# Supplementary material for: Cell Type–specific Adaptive Signaling Responses to KRASG12C Inhibition
Source: Oxford University Press journal article supplement (doi:10.1158/1078-0432.ccr-20-3872), 2021-02-22
Supplement: 10780432ccr203872-sup-252918_4_supp_6912869_qjcb38.xlsx [file 10780432ccr203872-sup-252918_4_supp_6912869_qjcb38.xlsx]

## Sheet: pY_all
RowIdentifier	OrigIdentifier	Proteins	RefType	Leading Proteins	Protein	Fasta Headers	Localization Prob	Score Diff	PEP	Score	Delta Score	Diagnostic Peak	Number of Phospho (STY)	Sequence Window	Modification Window	Peptide Window Coverage	Phospho (STY) Probabilities	Phospho (STY) Score Diffs	Position in Peptide	Charge	Mass Error [ppm]	Reverse	Potential Contaminant	id	Protein Group IDs	Positions	Position	Best Localization Evidence ID	Best Localization MS/MS ID	Best Localization Raw File	Best Localization Scan Number	Best Score Evidence ID	Best Score MS/MS ID	Best Score Raw File	Best Score Scan Number	Best PEP Evidence ID	Best PEP MS/MS ID	Best PEP Raw File	Best PEP Scan Number	Modification Type	Inferred Number of Sites	Inferred Modified Sequence	Modification Probability Order	Modification Site Probability Order	Modification Site Probability	Cumulative Modification Probability	Unmodified Sequence	CIC_Identifier	ModificationID
sp|P28482|MK01_HUMAN	sp|P28482|MK01_HUMAN	P28482	__Other	P28482	P28482	sp|P28482|MK01_HUMAN Mitogen-activated protein kinase 1 OS=Homo sapiens OX=9606 GN=MAPK1 PE=1 SV=3	0.999999	62.6103	1.70011e-135	301.48	274.98	---	2	LARVADPDHDHTGFLTEYVATRWYRAPEIML	X;X;X;X;X;X;X;X;X;X;X;X;X;X;X;Phospho (STY);X;Phospho (STY);X;X;X;X;X;X;X;X;X;X;X;X;X	XXXPPPPPPPPPPPPPPPPPPPXXXXXXXXX	VADPDHDHTGFLT(1)EY(1)VATR	VADPDHDHT(-62.61)GFLT(62.61)EY(50.46)VAT(-50.46)R	13	3	-2.1246	---	---	698	396	185	185	8912	12552	20191107_Haura_KRAS-G12C_TMT-Batch1-H358-pY_run2	13808	8912	12552	20191107_Haura_KRAS-G12C_TMT-Batch1-H358-pY_run2	13808	8912	12552	20191107_Haura_KRAS-G12C_TMT-Batch1-H358-pY_run2	13808	Phosphorylation (STY)	2	VADPDHDHTGFLpTEpYVATR	13,15>>n	185,187>>n	1	1	VADPDHDHTGFLTEYVATR	VADPDHDHTGFLpTEpYVATR;P28482;LARVADPDHDHTGFLTEYVATRWYRAPEIML;13;2;13,15>>n	ph_P28482:185
sp|P28482|MK01_HUMAN	sp|P28482|MK01_HUMAN	P28482	__Other	P28482	P28482	sp|P28482|MK01_HUMAN Mitogen-activated protein kinase 1 OS=Homo sapiens OX=9606 GN=MAPK1 PE=1 SV=3	0.999998	57.9824	1.70011e-135	301.48	274.98	+	1;2	RVADPDHDHTGFLTEYVATRWYRAPEIMLNS	X;X;X;X;X;X;X;X;X;X;X;X;X;Phospho (STY);X;Phospho (STY);X;X;X;X;X;X;X;X;X;X;X;X;X;X;X	XPPPPPPPPPPPPPPPPPPPXXXXXXXXXXX	VADPDHDHTGFLTEY(1)VATR	VADPDHDHT(-144.87)GFLT(-93.26)EY(57.98)VAT(-57.98)R	15	4	-0.62692	---	---	1508	396	187	187	8901	12518	20191112_Haura_KRAS-G12C_TMT-Batch2-Calu1-pY_run1	12662	8912	12552	20191107_Haura_KRAS-G12C_TMT-Batch1-H358-pY_run2	13808	8912	12552	20191107_Haura_KRAS-G12C_TMT-Batch1-H358-pY_run2	13808	Phosphorylation (STY)	1	VADPDHDHTGFLTEpYVATR	15>>n	187>>n	1	1	VADPDHDHTGFLTEYVATR	VADPDHDHTGFLTEpYVATR;P28482;RVADPDHDHTGFLTEYVATRWYRAPEIMLNS;15;1;15>>n	ph_P28482:187
sp|P27361|MK03_HUMAN	sp|P27361|MK03_HUMAN	P27361	__Other	P27361	P27361	sp|P27361|MK03_HUMAN Mitogen-activated protein kinase 3 OS=Homo sapiens OX=9606 GN=MAPK3 PE=1 SV=4	0.999998	56.5786	3.04116e-80	197.68	179.12	---	2	LARIADPEHDHTGFLTEYVATRWYRAPEIML	X;X;X;X;X;X;X;X;X;X;X;X;X;X;X;Phospho (STY);X;Phospho (STY);X;X;X;X;X;X;X;X;X;X;X;X;X	XXXPPPPPPPPPPPPPPPPPPPXXXXXXXXX	IADPEHDHTGFLT(1)EY(1)VATR	IADPEHDHT(-56.58)GFLT(56.58)EY(34.87)VAT(-34.87)R	13	3	0.06026	---	---	696	390	202	202	3829	5354	20191113_Haura_KRAS-G12C_TMT-Batch3-H1792-pY_run2	14369	3829	5354	20191113_Haura_KRAS-G12C_TMT-Batch3-H1792-pY_run2	14369	3825	5349	20191107_Haura_KRAS-G12C_TMT-Batch1-H358-pY_run2	14412	Phosphorylation (STY)	2	IADPEHDHTGFLpTEpYVATR	13,15>>n	202,204>>n	1	1	IADPEHDHTGFLTEYVATR	IADPEHDHTGFLpTEpYVATR;P27361;LARIADPEHDHTGFLTEYVATRWYRAPEIML;13;2;13,15>>n	ph_P27361:202
sp|P27361|MK03_HUMAN	sp|P27361|MK03_HUMAN	P27361	__Other	P27361	P27361	sp|P27361|MK03_HUMAN Mitogen-activated protein kinase 3 OS=Homo sapiens OX=9606 GN=MAPK3 PE=1 SV=4	0.999995	53.3537	3.04116e-80	230.93	209.27	+	1;2	RIADPEHDHTGFLTEYVATRWYRAPEIMLNS	X;X;X;X;X;X;X;X;X;X;X;X;X;Phospho (STY);X;Phospho (STY);X;X;X;X;X;X;X;X;X;X;X;X;X;X;X	XPPPPPPPPPPPPPPPPPPPXXXXXXXXXXX	IADPEHDHTGFLTEY(1)VATR	IADPEHDHT(-151.24)GFLT(-88.08)EY(53.35)VAT(-53.35)R	15	4	-1.0041	---	---	1497	390	204	204	3815	5334	20191112_Haura_KRAS-G12C_TMT-Batch2-Calu1-pY_run1	13210	3815	5334	20191112_Haura_KRAS-G12C_TMT-Batch2-Calu1-pY_run1	13210	3825	5349	20191107_Haura_KRAS-G12C_TMT-Batch1-H358-pY_run2	14412	Phosphorylation (STY)	1	IADPEHDHTGFLTEpYVATR	15>>n	204>>n	1	1	IADPEHDHTGFLTEYVATR	IADPEHDHTGFLTEpYVATR;P27361;RIADPEHDHTGFLTEYVATRWYRAPEIMLNS;15;1;15>>n	ph_P27361:204
sp|P08581|MET_HUMAN	sp|P08581|MET_HUMAN	P08581	__Other	P08581	P08581	sp|P08581|MET_HUMAN Hepatocyte growth factor receptor OS=Homo sapiens OX=9606 GN=MET PE=1 SV=4	0.964811	13.1576	9.97107e-08	145.71	106.92	+	1;2	KVADFGLARDMYDKEYYSVHNKTGAKLPVKW	X;X;X;X;X;X;X;X;X;X;Oxidation (M);X;X;X;X;Phospho (STY);Phospho (STY);Phospho (STY);X;X;X;X;X;X;X;X;X;X;X;X;X	XXXXXXXXXPPPPPPPPPPPPPPPPPXXXXX	DMYDKEY(0.965)Y(0.754)S(0.281)VHNK	DMY(-33.33)DKEY(13.16)Y(4.66)S(-4.66)VHNK	7	4	0.013581	---	---	1334	283	1234	1234	1442	1984	20191112_Haura_KRAS-G12C_TMT-Batch2-Calu1-pY_run2	11541	1437	1973	20191112_Haura_KRAS-G12C_TMT-Batch2-Calu1-pY_run1	11393	1470	2037	20191112_Haura_KRAS-G12C_TMT-Batch2-Calu1-pY_run2	9628	Phosphorylation (STY)	2	DMYDKEpYpYSVHNK	7>8>>n	1234>1235>>n	0.965	0.728	DMYDKEYYSVHNK	DMYDKEpYpYSVHNK;P08581;KVADFGLARDMYDKEYYSVHNKTGAKLPVKW;7;2;7>8>>n	ph_P08581:1234
sp|O60716|CTND1_HUMAN	sp|O60716|CTND1_HUMAN	O60716	__Other	O60716	O60716	sp|O60716|CTND1_HUMAN Catenin delta-1 OS=Homo sapiens OX=9606 GN=CTNND1 PE=1 SV=1	1	146.857	1.53375e-05	146.86	122.82	---	2	IEERYRPSMEGYRAPSRQDVYGPQPQVRVGG	X;X;X;X;Phospho (STY);X;X;X;Oxidation (M);X;X;Phospho (STY);X;X;X;Phospho (STY);X;X;X;X;Phospho (STY);X;X;X;X;X;X;X;X;X;X	XXXXXXXXXXXXXPPPPPPPPPPPPPPPXXX	APS(1)RQDVY(1)GPQPQVR	APS(146.86)RQDVY(146.86)GPQPQVR	3	3	-0.41954	---	---	70	189	252	252	587	836	20191113_Haura_KRAS-G12C_TMT-Batch3-H1792-pY_run2	9752	587	836	20191113_Haura_KRAS-G12C_TMT-Batch3-H1792-pY_run2	9752	587	836	20191113_Haura_KRAS-G12C_TMT-Batch3-H1792-pY_run2	9752	Phosphorylation (STY)	2	APpSRQDVpYGPQPQVR	3,8,x	252,257,x	1	1	APSRQDVYGPQPQVR	APpSRQDVpYGPQPQVR;O60716;IEERYRPSMEGYRAPSRQDVYGPQPQVRVGG;3;2;3,8,x	ph_O60716:252
sp|Q9UEU0|VTI1B_HUMAN	sp|Q9UEU0|VTI1B_HUMAN	Q9UEU0	__Other	Q9UEU0	Q9UEU0	sp|Q9UEU0|VTI1B_HUMAN Vesicle transport through interaction with t-SNAREs homolog 1B OS=Homo sapiens OX=9606 GN=VTI1B PE=1 SV=3	0.995495	23.4435	3.15392e-08	168.02	146.47	+	1	LTATPGGRGDMKYGIYAVENEHMNRLQSQRA	X;X;X;X;X;X;X;X;X;X;X;X;X;X;X;Phospho (STY);X;X;X;X;X;X;X;X;X;X;X;X;X;X;X	XXXXXXXXXXXXPPPPPPPPPPPPPXXXXXX	Y(0.005)GIY(0.995)AVENEHMNR	Y(-23.44)GIY(23.44)AVENEHMNR	4	3	-0.56872	---	---	2650	1066	115	115	9934	14080	20191107_Haura_KRAS-G12C_TMT-Batch1-H358-pY_run1	12016	9934	14080	20191107_Haura_KRAS-G12C_TMT-Batch1-H358-pY_run1	12016	9934	14080	20191107_Haura_KRAS-G12C_TMT-Batch1-H358-pY_run1	12016	Phosphorylation (STY)	1	YGIpYAVENEHMNR	4>>n	115>>n	0.995	0.995	YGIYAVENEHMNR	YGIpYAVENEHMNR;Q9UEU0;LTATPGGRGDMKYGIYAVENEHMNRLQSQRA;4;1;4>>n	ph_Q9UEU0:115
sp|P08493|MGP_HUMAN	sp|P08493|MGP_HUMAN	P08493	__Other	P08493	P08493	sp|P08493|MGP_HUMAN Matrix Gla protein OS=Homo sapiens OX=9606 GN=MGP PE=1 SV=2	1	65.3098	8.40504e-05	139.86	127.28	+	1	ELNREACDDYRLCERYAMVYGYNAAYNRYFR	X;X;X;X;X;X;X;X;X;X;X;X;X;X;X;Phospho (STY);X;X;X;X;X;X;X;X;X;X;X;X;X;X;X	XXXXXXXXXXXXXXXPPPPPPPPPPPPPXXX	Y(1)AMVYGYNAAYNR	Y(65.31)AMVY(-65.31)GY(-81.88)NAAY(-94.52)NR	1	2	-0.53805	---	---	1328	281	82	82	9803	13920	20191113_Haura_KRAS-G12C_TMT-Batch3-H1792-pY_run2	14108	9802	13919	20191113_Haura_KRAS-G12C_TMT-Batch3-H1792-pY_run2	14090	9802	13919	20191113_Haura_KRAS-G12C_TMT-Batch3-H1792-pY_run2	14090	Phosphorylation (STY)	1	pYAMVYGYNAAYNR	1>>n	82>>n	1	1	YAMVYGYNAAYNR	pYAMVYGYNAAYNR;P08493;ELNREACDDYRLCERYAMVYGYNAAYNRYFR;1;1;1>>n	ph_P08493:82
sp|Q96J84|KIRR1_HUMAN	sp|Q96J84|KIRR1_HUMAN	Q96J84	__Other	Q96J84	Q96J84	sp|Q96J84|KIRR1_HUMAN Kin of IRRE-like protein 1 OS=Homo sapiens OX=9606 GN=KIRREL1 PE=1 SV=2	0.87315	8.41787	0.00643529	120.09	99.22	---	1	YRLGYPQAPPSGLERTPYEAYDPIGKYATAT	X;X;X;X;X;X;X;X;X;X;X;X;X;X;X;Phospho (STY);X;X;X;X;X;X;X;X;X;X;X;X;X;X;X	XXXXXXXXXXXXXXXPPPPPPPPPPPXXXXX	T(0.873)PY(0.126)EAY(0.001)DPIGK	T(8.42)PY(-8.42)EAY(-28.77)DPIGK	1	2	3.4631	---	---	871	911	719	719	8580	12075	20191113_Haura_KRAS-G12C_TMT-Batch3-H1792-pY_run2	14094	8570	12059	20191112_Haura_KRAS-G12C_TMT-Batch2-Calu1-pY_run1	14213	8579	12074	20191113_Haura_KRAS-G12C_TMT-Batch3-H1792-pY_run2	14182	Phosphorylation (STY)	1	pTPYEAYDPIGK	1>>n	719>>n	0.873	0.873	TPYEAYDPIGK	pTPYEAYDPIGK;Q96J84;YRLGYPQAPPSGLERTPYEAYDPIGKYATAT;1;1;1>>n	ph_Q96J84:719
sp|Q12965|MYO1E_HUMAN	sp|Q12965|MYO1E_HUMAN	Q12965	__Other	Q12965	Q12965	sp|Q12965|MYO1E_HUMAN Unconventional myosin-Ie OS=Homo sapiens OX=9606 GN=MYO1E PE=1 SV=2	0.990534	20.197	0.0228141	43.027	13.217	+	1	SLFLLEEMRERKYDGYARVIQKSWRKFVARK	X;X;X;X;X;X;X;X;X;X;X;X;X;X;X;Phospho (STY);X;X;X;X;X;X;X;X;X;X;X;X;X;X;X	XXXXXXXXXXXPPPPPPPXXXXXXXXXXXXX	KY(0.009)DGY(0.991)AR	KY(-20.2)DGY(20.2)AR	5	3	-0.046181	---	---	1871	602	698	698	4740	6772	20191113_Haura_KRAS-G12C_TMT-Batch3-H1792-pY_run1	7443	4740	6772	20191113_Haura_KRAS-G12C_TMT-Batch3-H1792-pY_run1	7443	4740	6772	20191113_Haura_KRAS-G12C_TMT-Batch3-H1792-pY_run1	7443	Phosphorylation (STY)	1	KYDGpYAR	5>>n	698>>n	0.991	0.991	KYDGYAR	KYDGpYAR;Q12965;SLFLLEEMRERKYDGYARVIQKSWRKFVARK;5;1;5>>n	ph_Q12965:698
sp|Q7Z699|SPRE1_HUMAN	sp|Q7Z699|SPRE1_HUMAN	Q7Z699	__Other	Q7Z699	Q7Z699	sp|Q7Z699|SPRE1_HUMAN Sprouty-related, EVH1 domain-containing protein 1 OS=Homo sapiens OX=9606 GN=SPRED1 PE=1 SV=2	1	72.1513	0.00020249	124.83	62.12	+	1	TFGQPGLDIQSRSMEYVQRQISKECGSLKSQ	X;X;X;X;X;X;X;X;X;X;X;X;X;X;X;Phospho (STY);X;X;X;X;X;X;X;X;X;X;X;X;X;X;X	XXXXXXXXXXXXPPPPPPPXXXXXXXXXXXX	SMEY(1)VQR	S(-72.15)MEY(72.15)VQR	4	2	-0.022211	---	---	2124	761	211	211	7488	10583	20191107_Haura_KRAS-G12C_TMT-Batch1-H358-pY_run1	9117	7488	10583	20191107_Haura_KRAS-G12C_TMT-Batch1-H358-pY_run1	9117	7491	10586	20191112_Haura_KRAS-G12C_TMT-Batch2-Calu1-pY_run2	9045	Phosphorylation (STY)	1	SMEpYVQR	4>>n	211>>n	1	1	SMEYVQR	SMEpYVQR;Q7Z699;TFGQPGLDIQSRSMEYVQRQISKECGSLKSQ;4;1;4>>n	ph_Q7Z699:211
sp|P51810|GP143_HUMAN	sp|P51810|GP143_HUMAN	P51810	__Other	P51810	P51810	sp|P51810|GP143_HUMAN G-protein coupled receptor 143 OS=Homo sapiens OX=9606 GN=GPR143 PE=1 SV=2	0.998856	29.4099	0.000513347	96.331	39.602	+	1	TVTAVASLLKGRQGIYTENERRMGAVIKIRF	X;X;X;X;X;X;X;X;X;X;X;X;X;X;X;Phospho (STY);X;X;X;X;X;X;X;X;X;X;X;X;X;X;X	XXXXXXXXXXPPPPPPPPPPPPXXXXXXXXX	QGIY(0.999)T(0.001)ENERR	QGIY(29.41)T(-29.41)ENERR	4	3	0.96207	---	---	1637	470	231	231	6347	9043	20191113_Haura_KRAS-G12C_TMT-Batch3-H1792-pY_run1	6545	6346	9042	20191113_Haura_KRAS-G12C_TMT-Batch3-H1792-pY_run2	8077	6346	9042	20191113_Haura_KRAS-G12C_TMT-Batch3-H1792-pY_run2	8077	Phosphorylation (STY)	1	QGIpYTENERR	4>>n	231>>n	0.999	0.999	QGIYTENERR	QGIpYTENERR;P51810;TVTAVASLLKGRQGIYTENERRMGAVIKIRF;4;1;4>>n	ph_P51810:231
sp|Q14118|DAG1_HUMAN	sp|Q14118|DAG1_HUMAN	Q14118	__Other	Q14118	Q14118	sp|Q14118|DAG1_HUMAN Dystroglycan OS=Homo sapiens OX=9606 GN=DAG1 PE=1 SV=2	0.990942	22.2367	0.000149307	122.46	111.51	+	1	APMEGKGSRPKNMTPYRSPPPYVPP______	X;X;X;X;X;X;X;X;X;X;X;X;X;X;X;Phospho (STY);X;X;X;X;X;X;X;X;X;X;X;X;X;X;X	XXXXXXXXXXXPPPPPPPPPPPPPPXXXXXX	NMT(0.003)PY(0.991)RS(0.006)PPPYVPP	NMT(-25)PY(22.24)RS(-22.24)PPPY(-61.35)VPP	5	3	-0.22648	---	---	1925	633	886	886	5892	8440	20191112_Haura_KRAS-G12C_TMT-Batch2-Calu1-pY_run1	13400	5892	8440	20191112_Haura_KRAS-G12C_TMT-Batch2-Calu1-pY_run1	13400	5894	8444	20191112_Haura_KRAS-G12C_TMT-Batch2-Calu1-pY_run2	13387	Phosphorylation (STY)	1	NMTPpYRSPPPYVPP	5>>n	886>>n	0.991	0.991	NMTPYRSPPPYVPP	NMTPpYRSPPPYVPP;Q14118;APMEGKGSRPKNMTPYRSPPPYVPP______;5;1;5>>n	ph_Q14118:886
sp|P06239|LCK_HUMAN	sp|P06239|LCK_HUMAN	P06239	__Other	P06239	P06239	sp|P06239|LCK_HUMAN Tyrosine-protein kinase Lck OS=Homo sapiens OX=9606 GN=LCK PE=1 SV=6	0.999999	60.1065	2.51671e-61	265.36	231.44	+	1	VVKHYKIRNLDNGGFYISPRITFPGLHELVR	X;X;X;X;X;X;X;X;X;X;X;X;X;X;X;Phospho (STY);X;X;X;X;X;X;X;X;X;X;X;X;X;X;X	XXXXXXPPPPPPPPPPPPPPXXXXXXXXXXX	NLDNGGFY(1)ISPR	NLDNGGFY(60.11)IS(-60.11)PR	8	2	-0.16965	---	---	1273	265	192	192	5824	8355	20191107_Haura_KRAS-G12C_TMT-Batch1-H358-pY_run2	14671	5824	8355	20191107_Haura_KRAS-G12C_TMT-Batch1-H358-pY_run2	14671	5824	8355	20191107_Haura_KRAS-G12C_TMT-Batch1-H358-pY_run2	14671	Phosphorylation (STY)	1	NLDNGGFpYISPR	8>>n	192>>n	1	1	NLDNGGFYISPR	NLDNGGFpYISPR;P06239;VVKHYKIRNLDNGGFYISPRITFPGLHELVR;8;1;8>>n	ph_P06239:192
sp|P60842|IF4A1_HUMAN	sp|P60842|IF4A1_HUMAN	P60842	__Other	P60842	P60842	sp|P60842|IF4A1_HUMAN Eukaryotic initiation factor 4A-I OS=Homo sapiens OX=9606 GN=EIF4A1 PE=1 SV=1	1	57.0193	0.00815732	57.019	42.047	---	1	DEADEMLSRGFKDQIYDIFQKLNSNTQVVLL	X;X;X;X;X;X;X;X;X;X;X;X;X;X;X;Phospho (STY);X;X;X;X;X;X;X;X;X;X;X;X;X;X;X	XXXXXXXXXPPPPPPPPPPPPXXXXXXXXXX	GFKDQIY(1)DIFQK	GFKDQIY(57.02)DIFQK	7	3	1.7392	---	---	1695	503	197	197	2782	3855	20191113_Haura_KRAS-G12C_TMT-Batch3-H1792-pY_run2	17594	2782	3855	20191113_Haura_KRAS-G12C_TMT-Batch3-H1792-pY_run2	17594	2782	3855	20191113_Haura_KRAS-G12C_TMT-Batch3-H1792-pY_run2	17594	Phosphorylation (STY)	1	GFKDQIpYDIFQK	7,x	197,x	1	1	GFKDQIYDIFQK	GFKDQIpYDIFQK;P60842;DEADEMLSRGFKDQIYDIFQKLNSNTQVVLL;7;1;7,x	ph_P60842:197
sp|Q3V6T2|GRDN_HUMAN	sp|Q3V6T2|GRDN_HUMAN	Q3V6T2	__Other	Q3V6T2	Q3V6T2	sp|Q3V6T2|GRDN_HUMAN Girdin OS=Homo sapiens OX=9606 GN=CCDC88A PE=1 SV=2	0.796151	5.91692	0.00116475	114.89	51.415	---	1	ESSLSRQSKDSNPYATLPRASSVISTAEGTT	X;X;X;X;X;X;X;X;X;X;X;X;X;X;X;Phospho (STY);X;X;X;X;X;X;X;X;X;X;X;X;X;X;X	XXXXXXXXXPPPPPPPPPPXXXXXXXXXXXX	DSNPY(0.204)AT(0.796)LPR	DS(-53.92)NPY(-5.92)AT(5.92)LPR	7	2	0.35666	---	---	806	684	1801	1801	1542	2116	20191107_Haura_KRAS-G12C_TMT-Batch1-H358-pY_run1	10641	1542	2116	20191107_Haura_KRAS-G12C_TMT-Batch1-H358-pY_run1	10641	1542	2116	20191107_Haura_KRAS-G12C_TMT-Batch1-H358-pY_run1	10641	Phosphorylation (STY)	1	DSNPYApTLPR	7>>n	1801>>n	0.796	0.796	DSNPYATLPR	DSNPYApTLPR;Q3V6T2;ESSLSRQSKDSNPYATLPRASSVISTAEGTT;7;1;7>>n	ph_Q3V6T2:1801
sp|Q14498|RBM39_HUMAN	sp|Q14498|RBM39_HUMAN	Q14498	__Other	Q14498	Q14498	sp|Q14498|RBM39_HUMAN RNA-binding protein 39 OS=Homo sapiens OX=9606 GN=RBM39 PE=1 SV=2	0.945528	13.3927	0.00867722	75.695	57.384	---	2	SRSRSRDRRFRGRYRSPYSGPKFNSAIRGKI	X;X;X;X;X;X;X;X;X;X;X;X;X;X;X;Phospho (STY);X;Phospho (STY);X;X;X;X;X;X;X;X;X;X;X;X;X	XXXXXXXXXXXXXPPPPPPPPPXXXXXXXXX	Y(0.053)RS(0.946)PY(0.98)S(0.021)GPK	Y(-13.39)RS(13.39)PY(20.13)S(-20.13)GPK	3	3	1.1898	---	---	312	645	97	97	10306	14573	20191112_Haura_KRAS-G12C_TMT-Batch2-Calu1-pY_run2	8857	10306	14573	20191112_Haura_KRAS-G12C_TMT-Batch2-Calu1-pY_run2	8857	10306	14573	20191112_Haura_KRAS-G12C_TMT-Batch2-Calu1-pY_run2	8857	Phosphorylation (STY)	2	YRpSPpYSGPK	5,3>>n	99,97>>n	0.946	0.927	YRSPYSGPK	YRpSPpYSGPK;Q14498;SRSRSRDRRFRGRYRSPYSGPKFNSAIRGKI;3;2;5,3>>n	ph_Q14498:97
sp|Q14498|RBM39_HUMAN	sp|Q14498|RBM39_HUMAN	Q14498	__Other	Q14498	Q14498	sp|Q14498|RBM39_HUMAN RNA-binding protein 39 OS=Homo sapiens OX=9606 GN=RBM39 PE=1 SV=2	0.980279	20.1282	0.00867722	75.695	57.384	+	2	SRSRDRRFRGRYRSPYSGPKFNSAIRGKIGL	X;X;X;X;X;X;X;X;X;X;X;X;X;Phospho (STY);X;Phospho (STY);X;X;X;X;X;X;X;X;X;X;X;X;X;X;X	XXXXXXXXXXXPPPPPPPPPXXXXXXXXXXX	Y(0.053)RS(0.946)PY(0.98)S(0.021)GPK	Y(-13.39)RS(13.39)PY(20.13)S(-20.13)GPK	5	3	1.1898	---	---	1955	645	99	99	10306	14573	20191112_Haura_KRAS-G12C_TMT-Batch2-Calu1-pY_run2	8857	10306	14573	20191112_Haura_KRAS-G12C_TMT-Batch2-Calu1-pY_run2	8857	10306	14573	20191112_Haura_KRAS-G12C_TMT-Batch2-Calu1-pY_run2	8857	Phosphorylation (STY)	2	YRpSPpYSGPK	5,3>>n	99,97>>n	0.98	0.927	YRSPYSGPK	YRpSPpYSGPK;Q14498;SRSRDRRFRGRYRSPYSGPKFNSAIRGKIGL;5;2;5,3>>n	ph_Q14498:99
sp|P06239|LCK_HUMAN	sp|P06239|LCK_HUMAN	P06239	__Other	P06239	P06239	sp|P06239|LCK_HUMAN Tyrosine-protein kinase Lck OS=Homo sapiens OX=9606 GN=LCK PE=1 SV=6	0.999998	57.6361	2.44835e-13	160.81	135.09	+	1	LRSVLEDFFTATEGQYQPQP___________	X;X;X;X;X;X;X;X;X;X;X;X;X;X;X;Phospho (STY);X;X;X;X;X;X;X;X;X;X;X;X;X;X;X	XXPPPPPPPPPPPPPPPPPPXXXXXXXXXXX	SVLEDFFTATEGQY(1)QPQP	S(-118.5)VLEDFFT(-74.08)AT(-57.64)EGQY(57.64)QPQP	14	3	0.038969	---	---	1275	265	505	505	7986	11277	20191107_Haura_KRAS-G12C_TMT-Batch1-H358-pY_run1	23819	7986	11277	20191107_Haura_KRAS-G12C_TMT-Batch1-H358-pY_run1	23819	7986	11277	20191107_Haura_KRAS-G12C_TMT-Batch1-H358-pY_run1	23819	Phosphorylation (STY)	1	SVLEDFFTATEGQpYQPQP	14>>n	505>>n	1	1	SVLEDFFTATEGQYQPQP	SVLEDFFTATEGQpYQPQP;P06239;LRSVLEDFFTATEGQYQPQP___________;14;1;14>>n	ph_P06239:505
sp|P09651|ROA1_HUMAN	sp|P09651|ROA1_HUMAN	P09651	__Other	P09651	P09651	sp|P09651|ROA1_HUMAN Heterogeneous nuclear ribonucleoprotein A1 OS=Homo sapiens OX=9606 GN=HNRNPA1 PE=1 SV=5	0.881086	8.69786	0.0400498	43.382	29.125	---	1	__________MSKSESPKEPEQLRKLFIGGL	X;X;X;X;X;X;X;X;X;X;X;X;X;X;X;Phospho (STY);X;X;X;X;X;X;X;X;X;X;X;X;X;X;X	XXXXXXXXXXXXXPPPPPPPPPPPXXXXXXX	S(0.119)ES(0.881)PKEPEQLR	S(-8.7)ES(8.7)PKEPEQLR	3	3	-1.0204	---	---	150	293	6	6	7066	9954	20191107_Haura_KRAS-G12C_TMT-Batch1-H358-pY_run1	9190	7066	9954	20191107_Haura_KRAS-G12C_TMT-Batch1-H358-pY_run1	9190	7066	9954	20191107_Haura_KRAS-G12C_TMT-Batch1-H358-pY_run1	9190	Phosphorylation (STY)	1	SEpSPKEPEQLR	3>>n	6>>n	0.881	0.881	SESPKEPEQLR	SEpSPKEPEQLR;P09651;__________MSKSESPKEPEQLRKLFIGGL;3;1;3>>n	ph_P09651:6
sp|Q9C0B5|ZDHC5_HUMAN	sp|Q9C0B5|ZDHC5_HUMAN	Q9C0B5	__Other	Q9C0B5	Q9C0B5	sp|Q9C0B5|ZDHC5_HUMAN Palmitoyltransferase ZDHHC5 OS=Homo sapiens OX=9606 GN=ZDHHC5 PE=1 SV=2	1	81.4275	1.81979e-07	113.69	101.25	+	1	AEEDEDKEDDFRAPLYKTVEIKGIQVRMKWC	X;X;X;X;X;X;X;X;X;X;X;X;X;X;X;Phospho (STY);X;X;X;X;X;X;X;X;X;X;X;X;X;X;X	PPPPPPPPPPPPPPPPPXXXXXXXXXXXXXX	AEEDEDKEDDFRAPLY(1)K	AEEDEDKEDDFRAPLY(81.43)K	16	4	2.2262	---	---	2490	972	91	91	137	166	20191113_Haura_KRAS-G12C_TMT-Batch3-H1792-pY_run2	12739	136	165	20191113_Haura_KRAS-G12C_TMT-Batch3-H1792-pY_run1	12664	136	165	20191113_Haura_KRAS-G12C_TMT-Batch3-H1792-pY_run1	12664	Phosphorylation (STY)	1	AEEDEDKEDDFRAPLpYK	16,x	91,x	1	1	AEEDEDKEDDFRAPLYK	AEEDEDKEDDFRAPLpYK;Q9C0B5;AEEDEDKEDDFRAPLYKTVEIKGIQVRMKWC;16;1;16,x	ph_Q9C0B5:91
sp|Q96J84|KIRR1_HUMAN	sp|Q96J84|KIRR1_HUMAN	Q96J84	__Other	Q96J84	Q96J84	sp|Q96J84|KIRR1_HUMAN Kin of IRRE-like protein 1 OS=Homo sapiens OX=9606 GN=KIRREL1 PE=1 SV=2	0.999542	33.4098	3.18395e-07	90.444	75.653	+	1	YATATRFSYTSQHSDYGQRFQQRMQTHV___	Phospho (STY);X;X;X;X;X;X;X;X;X;X;X;X;X;X;Phospho (STY);X;X;X;X;X;X;X;X;X;X;X;X;X;X;X	XXXXXXPPPPPPPPPPPPPXXXXXXXXXXXX	FSYTSQHSDY(1)GQR	FS(-74.26)Y(-67.3)T(-67.24)S(-57.9)QHS(-33.41)DY(33.41)GQR	10	3	-0.43799	---	---	2361	911	745	745	2583	3488	20191113_Haura_KRAS-G12C_TMT-Batch3-H1792-pY_run2	9317	2583	3488	20191113_Haura_KRAS-G12C_TMT-Batch3-H1792-pY_run2	9317	2583	3488	20191113_Haura_KRAS-G12C_TMT-Batch3-H1792-pY_run2	9317	Phosphorylation (STY)	1	FSYTSQHSDpYGQR	10>>n	745>>n	1	1	FSYTSQHSDYGQR	FSYTSQHSDpYGQR;Q96J84;YATATRFSYTSQHSDYGQRFQQRMQTHV___;10;1;10>>n	ph_Q96J84:745
sp|O95628|CNOT4_HUMAN	sp|O95628|CNOT4_HUMAN	O95628	__Other	O95628	O95628	sp|O95628|CNOT4_HUMAN CCR4-NOT transcription complex subunit 4 OS=Homo sapiens OX=9606 GN=CNOT4 PE=1 SV=3	0.986278	21.2286	0.0248837	40.552	16.509	+	2	GRTLKASLGTTKYCSYFLKNMQCPKPDCMYL	X;X;X;X;X;X;Phospho (STY);X;X;X;X;X;X;X;X;Phospho (STY);X;X;X;X;X;X;X;X;X;X;X;X;X;X;X	XXXXXPPPPPPPPPPPPPPXXXXXXXXXXXX	AS(0.429)LGT(0.429)T(0.074)KY(0.068)CS(0.015)Y(0.986)FLK	AS(0)LGT(0)T(-7.82)KY(-8.28)CS(-21.23)Y(21.23)FLK	11	4	2.3636	---	---	1224	231	198	198	726	1027	20191113_Haura_KRAS-G12C_TMT-Batch3-H1792-pY_run2	8411	726	1027	20191113_Haura_KRAS-G12C_TMT-Batch3-H1792-pY_run2	8411	726	1027	20191113_Haura_KRAS-G12C_TMT-Batch3-H1792-pY_run2	8411	Phosphorylation (STY)	2	ApSLGTTKYCSpYFLK	11>>2,n	198>>189,n	0.986	0.423	ASLGTTKYCSYFLK	ApSLGTTKYCSpYFLK;O95628;GRTLKASLGTTKYCSYFLKNMQCPKPDCMYL;11;2;11>>2,n	ph_O95628:198
sp|P62753|RS6_HUMAN	sp|P62753|RS6_HUMAN	P62753	__Other	P62753	P62753	sp|P62753|RS6_HUMAN 40S ribosomal protein S6 OS=Homo sapiens OX=9606 GN=RPS6 PE=1 SV=1	0.997509	26.0254	0.0184403	57.96	46.112	+	1	THGRVRLLLSKGHSCYRPRRTGERKRKSVRG	X;X;X;X;X;X;X;X;X;X;X;X;X;X;X;Phospho (STY);X;X;X;X;X;X;X;X;X;X;X;X;X;X;X	XXXXXXXXXXXPPPPPPPPXXXXXXXXXXXX	GHS(0.002)CY(0.998)RPR	GHS(-26.03)CY(26.03)RPR	5	3	0.10376	---	---	1714	518	84	84	2890	3996	20191113_Haura_KRAS-G12C_TMT-Batch3-H1792-pY_run1	3658	2890	3996	20191113_Haura_KRAS-G12C_TMT-Batch3-H1792-pY_run1	3658	2890	3996	20191113_Haura_KRAS-G12C_TMT-Batch3-H1792-pY_run1	3658	Phosphorylation (STY)	1	GHSCpYRPR	5>>n	84>>n	0.998	0.998	GHSCYRPR	GHSCpYRPR;P62753;THGRVRLLLSKGHSCYRPRRTGERKRKSVRG;5;1;5>>n	ph_P62753:84
sp|P29323|EPHB2_HUMAN	sp|P29323|EPHB2_HUMAN	P29323	__Other	P29323	P29323	sp|P29323|EPHB2_HUMAN Ephrin type-B receptor 2 OS=Homo sapiens OX=9606 GN=EPHB2 PE=1 SV=5	0.807807	6.24199	0.00225381	89.247	54.023	---	1	IVCNRRGFERADSEYTDKLQHYTSGHMTPGM	X;X;X;X;X;X;X;X;X;X;X;X;X;X;X;Phospho (STY);X;X;X;X;X;X;X;X;X;X;X;X;X;X;X	XXXXXXXXXXPPPPPPPPXXXXXXXXXXXXX	ADSEY(0.192)T(0.808)DK	ADS(-34.64)EY(-6.24)T(6.24)DK	6	2	2.5058	---	---	707	400	578	578	114	132	20191113_Haura_KRAS-G12C_TMT-Batch3-H1792-pY_run2	8417	114	132	20191113_Haura_KRAS-G12C_TMT-Batch3-H1792-pY_run2	8417	114	132	20191113_Haura_KRAS-G12C_TMT-Batch3-H1792-pY_run2	8417	Phosphorylation (STY)	1	ADSEYpTDK	6>>n	578>>n	0.808	0.808	ADSEYTDK	ADSEYpTDK;P29323;IVCNRRGFERADSEYTDKLQHYTSGHMTPGM;6;1;6>>n	ph_P29323:578
sp|P10586|PTPRF_HUMAN	sp|P10586|PTPRF_HUMAN	P10586	__Other	P10586	P10586	sp|P10586|PTPRF_HUMAN Receptor-type tyrosine-protein phosphatase F OS=Homo sapiens OX=9606 GN=PTPRF PE=1 SV=2	0.992049	20.9609	0.00142205	83.265	59.11	+	1	LLAHSSDPVEMRRLNYQTPGMRDHPPIPITD	X;X;X;X;X;X;X;X;X;X;X;X;X;X;X;Phospho (STY);X;X;X;X;X;X;X;X;X;X;X;X;X;X;X	XXXXXXXXXXXXXPPPPPPPPPXXXXXXXXX	LNY(0.992)QT(0.008)PGMR	LNY(20.96)QT(-20.96)PGMR	3	2	0.89293	---	---	1365	300	1321	1321	5108	7382	20191107_Haura_KRAS-G12C_TMT-Batch1-H358-pY_run1	11122	5109	7383	20191107_Haura_KRAS-G12C_TMT-Batch1-H358-pY_run2	11088	5109	7383	20191107_Haura_KRAS-G12C_TMT-Batch1-H358-pY_run2	11088	Phosphorylation (STY)	1	LNpYQTPGMR	3>>n	1321>>n	0.992	0.992	LNYQTPGMR	LNpYQTPGMR;P10586;LLAHSSDPVEMRRLNYQTPGMRDHPPIPITD;3;1;3>>n	ph_P10586:1321
sp|Q9H6X2|ANTR1_HUMAN	sp|Q9H6X2|ANTR1_HUMAN	P58335;Q9H6X2	__Other	Q9H6X2	Q9H6X2	sp|Q9H6X2|ANTR1_HUMAN Anthrax toxin receptor 1 OS=Homo sapiens OX=9606 GN=ANTXR1 PE=1 SV=2;sp|P58335|ANTR2_HUMAN Anthrax toxin receptor 2 OS=Homo sapiens OX=9606 GN=ANTXR2 PE=1 SV=5	0.980728	17.0988	4.52937e-05	141.54	117.15	+	1	DGLPKKKWPTVDASYYGGRGVGGIKRMEVRW	X;X;X;X;X;X;X;X;X;X;X;X;X;X;X;Phospho (STY);X;X;X;X;X;X;X;X;X;X;X;X;X;X;X	XXXXXXPPPPPPPPPPPPPXXXXXXXXXXXX	WPTVDASY(0.019)Y(0.981)GGR	WPT(-85.41)VDAS(-38.34)Y(-17.1)Y(17.1)GGR	9	2	-1.1594	---	---	2533	1001	383	383	9734	13848	20191112_Haura_KRAS-G12C_TMT-Batch2-Calu1-pY_run1	14977	4736	6768	20191107_Haura_KRAS-G12C_TMT-Batch1-H358-pY_run1	13000	4736	6768	20191107_Haura_KRAS-G12C_TMT-Batch1-H358-pY_run1	13000	Phosphorylation (STY)	1	WPTVDASYpYGGR	9>>n	383>>n	0.981	0.981	WPTVDASYYGGR	WPTVDASYpYGGR;P58335;Q9H6X2;DGLPKKKWPTVDASYYGGRGVGGIKRMEVRW;9;1;9>>n	ph_Q9H6X2:383
sp|Q00610|CLH1_HUMAN	sp|Q00610|CLH1_HUMAN	Q00610	__Other	Q00610	Q00610	sp|Q00610|CLH1_HUMAN Clathrin heavy chain 1 OS=Homo sapiens OX=9606 GN=CLTC PE=1 SV=5	0.983637	17.8036	0.000287985	133.89	89.575	+	1	IDSNNNPERFLRENPYYDSRVVGKYCEKRDP	X;X;X;X;X;X;X;X;X;X;X;X;X;X;X;Phospho (STY);X;X;X;X;X;X;X;X;X;X;X;X;X;X;X	XXXXXXXXXPPPPPPPPPPPXXXXXXXXXXX	FLRENPY(0.984)Y(0.016)DSR	FLRENPY(17.8)Y(-17.8)DS(-42.75)R	7	3	-0.54397	---	---	1763	551	899	899	2501	3392	20191113_Haura_KRAS-G12C_TMT-Batch3-H1792-pY_run1	11372	2502	3393	20191113_Haura_KRAS-G12C_TMT-Batch3-H1792-pY_run2	11447	2046	2757	20191113_Haura_KRAS-G12C_TMT-Batch3-H1792-pY_run1	7927	Phosphorylation (STY)	1	FLRENPpYYDSR	7>>n	899>>n	0.984	0.984	FLRENPYYDSR	FLRENPpYYDSR;Q00610;IDSNNNPERFLRENPYYDSRVVGKYCEKRDP;7;1;7>>n	ph_Q00610:899
sp|Q92738|US6NL_HUMAN	sp|Q92738|US6NL_HUMAN	Q92738	__Other	Q92738	Q92738	sp|Q92738|US6NL_HUMAN USP6 N-terminal-like protein OS=Homo sapiens OX=9606 GN=USP6NL PE=1 SV=3	0.929542	11.2723	4.92382e-05	109.86	71.624	---	1	ELDSGASVEEALERAYSQSPRHALYPPSPRK	X;X;X;X;X;X;X;X;X;X;X;X;X;X;X;Phospho (STY);X;X;X;X;X;X;X;X;X;X;X;X;X;X;X	XXXXXXXXXXXXXXPPPPPPPXXXXXXXXXX	AY(0.93)S(0.069)QS(0.001)PR	AY(11.27)S(-11.27)QS(-29.23)PR	2	2	-0.12447	---	---	2312	881	573	573	967	1355	20191113_Haura_KRAS-G12C_TMT-Batch3-H1792-pY_run1	5583	968	1357	20191113_Haura_KRAS-G12C_TMT-Batch3-H1792-pY_run2	5711	968	1357	20191113_Haura_KRAS-G12C_TMT-Batch3-H1792-pY_run2	5711	Phosphorylation (STY)	1	ApYSQSPR	2>>n	573>>n	0.93	0.93	AYSQSPR	ApYSQSPR;Q92738;ELDSGASVEEALERAYSQSPRHALYPPSPRK;2;1;2>>n	ph_Q92738:573
sp|Q9BY49|PECR_HUMAN	sp|Q9BY49|PECR_HUMAN	Q9BY49	__Other	Q9BY49	Q9BY49	sp|Q9BY49|PECR_HUMAN Peroxisomal trans-2-enoyl-CoA reductase OS=Homo sapiens OX=9606 GN=PECR PE=1 SV=2	0.999644	34.4805	0.00226265	88.948	29.967	+	1	GFPLAVHSGAARAGVYNLTKSLALEWACSGI	X;X;X;X;X;X;X;X;X;X;X;X;X;X;X;Phospho (STY);X;X;X;X;X;X;X;X;X;X;X;X;X;X;X	XXXXXXXXXXXXPPPPPPPPXXXXXXXXXXX	AGVY(1)NLTK	AGVY(34.48)NLT(-34.48)K	4	2	4.299	---	---	2481	962	179	179	319	491	20191113_Haura_KRAS-G12C_TMT-Batch3-H1792-pY_run2	12276	318	490	20191113_Haura_KRAS-G12C_TMT-Batch3-H1792-pY_run1	12207	318	490	20191113_Haura_KRAS-G12C_TMT-Batch3-H1792-pY_run1	12207	Phosphorylation (STY)	1	AGVpYNLTK	4>>n	179>>n	1	1	AGVYNLTK	AGVpYNLTK;Q9BY49;GFPLAVHSGAARAGVYNLTKSLALEWACSGI;4;1;4>>n	ph_Q9BY49:179
sp|P06737|PYGL_HUMAN	sp|P06737|PYGL_HUMAN	P06737	__Other	P06737	P06737	sp|P06737|PYGL_HUMAN Glycogen phosphorylase, liver form OS=Homo sapiens OX=9606 GN=PYGL PE=1 SV=4	0.60249	1.80624	0.00173474	68.069	46.818	---	1	VRDHLVGRWIRTQQHYYDKCPKRVYYLSLEF	X;X;X;X;X;X;X;X;X;X;X;X;X;X;X;Phospho (STY);X;X;X;X;X;X;X;X;X;X;X;X;X;X;X	XXXXXXXXXXXPPPPPPPPPPPXXXXXXXXX	TQQHY(0.602)Y(0.397)DKCPK	T(-44.69)QQHY(1.81)Y(-1.81)DKCPK	5	4	-0.28753	---	---	1288	269	75	75	8602	12099	20191113_Haura_KRAS-G12C_TMT-Batch3-H1792-pY_run2	7996	8602	12099	20191113_Haura_KRAS-G12C_TMT-Batch3-H1792-pY_run2	7996	8602	12099	20191113_Haura_KRAS-G12C_TMT-Batch3-H1792-pY_run2	7996	Phosphorylation (STY)	1	TQQHpYYDKCPK	5>n	75>n	0.602	0.602	TQQHYYDKCPK	TQQHpYYDKCPK;P06737;VRDHLVGRWIRTQQHYYDKCPKRVYYLSLEF;5;1;5>n	ph_P06737:75
sp|Q5VY43|PEAR1_HUMAN	sp|Q5VY43|PEAR1_HUMAN	Q5VY43	__Other	Q5VY43	Q5VY43	sp|Q5VY43|PEAR1_HUMAN Platelet endothelial aggregation receptor 1 OS=Homo sapiens OX=9606 GN=PEAR1 PE=1 SV=1	0.982627	18.1177	1.38963e-05	70.666	61.166	+	1;2	IRDLPSLPGGPRESSYMEMKGPPSGSPPRQP	X;X;X;X;X;X;X;X;X;X;X;X;X;X;X;Phospho (STY);Oxidation (M);X;Oxidation (M);X;X;X;X;Phospho (STY);X;X;X;X;X;X;X	XXXXXXXXXXXXPPPPPPPPPPPPPPPPPPP	ES(0.002)S(0.015)Y(0.983)MEMK	ES(-26.53)S(-18.12)Y(18.12)MEMK	4	2	-1.388	---	---	2057	714	943	943	2213	2979	20191112_Haura_KRAS-G12C_TMT-Batch2-Calu1-pY_run1	9625	2216	2982	20191112_Haura_KRAS-G12C_TMT-Batch2-Calu1-pY_run2	14525	2216	2982	20191112_Haura_KRAS-G12C_TMT-Batch2-Calu1-pY_run2	14525	Phosphorylation (STY)	1	ESSpYMEMK	4>>n	943>>n	0.983	0.983	ESSYMEMK	ESSpYMEMK;Q5VY43;IRDLPSLPGGPRESSYMEMKGPPSGSPPRQP;4;1;4>>n	ph_Q5VY43:943
sp|Q5VTE0|EF1A3_HUMAN	sp|Q5VTE0|EF1A3_HUMAN	P68104;Q05639;Q5VTE0	__Other	Q5VTE0	Q5VTE0	sp|Q5VTE0|EF1A3_HUMAN Putative elongation factor 1-alpha-like 3 OS=Homo sapiens OX=9606 GN=EEF1A1P5 PE=5 SV=1;sp|P68104|EF1A1_HUMAN Elongation factor 1-alpha 1 OS=Homo sapiens OX=9606 GN=EEF1A1 PE=1 SV=1;sp|Q05639|EF1A2_HUMAN Elongation factor 1-alpha 2 OS	0.569146	1.20894	0.00680258	59.908	40.295	---	1	ISKNGQTREHALLAYTLGVKQLIVGVNKMDS	X;X;X;X;X;X;X;X;X;X;X;X;X;X;X;Phospho (STY);X;X;X;X;X;X;X;X;X;X;X;X;X;X;X	XXXXXXXXPPPPPPPPPPPPXXXXXXXXXXX	EHALLAY(0.431)T(0.569)LGVK	EHALLAY(-1.21)T(1.21)LGVK	8	2	1.6597	---	---	754	527	142	142	1926	2589	20191113_Haura_KRAS-G12C_TMT-Batch3-H1792-pY_run2	15643	1926	2589	20191113_Haura_KRAS-G12C_TMT-Batch3-H1792-pY_run2	15643	1926	2589	20191113_Haura_KRAS-G12C_TMT-Batch3-H1792-pY_run2	15643	Phosphorylation (STY)	1	EHALLAYpTLGVK	8>n	142>n	0.569	0.569	EHALLAYTLGVK	EHALLAYpTLGVK;P68104;Q05639;Q5VTE0;ISKNGQTREHALLAYTLGVKQLIVGVNKMDS;8;1;8>n	ph_Q5VTE0:142
sp|Q6ZW31|SYDE1_HUMAN	sp|Q6ZW31|SYDE1_HUMAN	Q6ZW31	__Other	Q6ZW31	Q6ZW31	sp|Q6ZW31|SYDE1_HUMAN Rho GTPase-activating protein SYDE1 OS=Homo sapiens OX=9606 GN=SYDE1 PE=1 SV=1	1	88.7971	1.50856e-07	177.36	148.27	+	1	RPRGRGGPESPPSNRYAGDWSVCGRDFLPCG	X;X;X;X;X;X;X;X;X;X;X;X;X;X;X;Phospho (STY);X;X;X;X;X;X;X;X;X;X;X;X;X;X;X	XXXXXXXXXXXXXXXPPPPPPPPPPXXXXXX	Y(1)AGDWSVCGR	Y(88.8)AGDWS(-88.8)VCGR	1	2	0.70755	---	---	2105	744	651	651	9780	13897	20191112_Haura_KRAS-G12C_TMT-Batch2-Calu1-pY_run1	12375	9781	13898	20191112_Haura_KRAS-G12C_TMT-Batch2-Calu1-pY_run2	12488	9781	13898	20191112_Haura_KRAS-G12C_TMT-Batch2-Calu1-pY_run2	12488	Phosphorylation (STY)	1	pYAGDWSVCGR	1>>n	651>>n	1	1	YAGDWSVCGR	pYAGDWSVCGR;Q6ZW31;RPRGRGGPESPPSNRYAGDWSVCGRDFLPCG;1;1;1>>n	ph_Q6ZW31:651
sp|Q14683|SMC1A_HUMAN	sp|Q14683|SMC1A_HUMAN	Q14683	__Other	Q14683	Q14683	sp|Q14683|SMC1A_HUMAN Structural maintenance of chromosomes protein 1A OS=Homo sapiens OX=9606 GN=SMC1A PE=1 SV=2	0.508508	0.630903	0.00231147	70.963	48.765	---	1	QVQSQAHGLQMRLKYSQSDLEQTKTRHLALN	X;X;X;X;X;X;X;X;X;X;X;X;X;X;X;Phospho (STY);X;X;X;X;X;X;X;X;X;X;X;X;X;X;X	XXXXXXXXXXXXPPPPPPPPPPPPXXXXXXX	LKY(0.44)S(0.509)QS(0.052)DLEQTK	LKY(-0.63)S(0.63)QS(-9.92)DLEQT(-62.86)K	4	3	1.0207	---	---	314	650	715	715	5003	7219	20191107_Haura_KRAS-G12C_TMT-Batch1-H358-pY_run2	11490	5003	7219	20191107_Haura_KRAS-G12C_TMT-Batch1-H358-pY_run2	11490	5003	7219	20191107_Haura_KRAS-G12C_TMT-Batch1-H358-pY_run2	11490	Phosphorylation (STY)	1	LKYpSQSDLEQTK	4>n	715>n	0.509	0.509	LKYSQSDLEQTK	LKYpSQSDLEQTK;Q14683;QVQSQAHGLQMRLKYSQSDLEQTKTRHLALN;4;1;4>n	ph_Q14683:715
sp|Q8N1I0|DOCK4_HUMAN	sp|Q8N1I0|DOCK4_HUMAN	Q8N1I0	__Other	Q8N1I0	Q8N1I0	sp|Q8N1I0|DOCK4_HUMAN Dedicator of cytokinesis protein 4 OS=Homo sapiens OX=9606 GN=DOCK4 PE=1 SV=3	0.926777	11.0586	0.00266357	68.657	38.49	+	1	EPVRKESKTPPPYSVYERTLRRPVPLPHSLS	X;X;X;X;X;X;X;X;X;X;X;X;X;X;X;Phospho (STY);X;X;X;X;X;X;X;X;X;X;X;X;X;X;X	XXXXXXXXPPPPPPPPPPXXXXXXXXXXXXX	TPPPY(0.001)S(0.073)VY(0.927)ER	T(-55.62)PPPY(-31.96)S(-11.06)VY(11.06)ER	8	2	-2.662	---	---	2194	808	1906	1906	8540	12024	20191113_Haura_KRAS-G12C_TMT-Batch3-H1792-pY_run2	11123	8540	12024	20191113_Haura_KRAS-G12C_TMT-Batch3-H1792-pY_run2	11123	8540	12024	20191113_Haura_KRAS-G12C_TMT-Batch3-H1792-pY_run2	11123	Phosphorylation (STY)	1	TPPPYSVpYER	8>>n	1906>>n	0.927	0.927	TPPPYSVYER	TPPPYSVpYER;Q8N1I0;EPVRKESKTPPPYSVYERTLRRPVPLPHSLS;8;1;8>>n	ph_Q8N1I0:1906
sp|Q9H0H5|RGAP1_HUMAN	sp|Q9H0H5|RGAP1_HUMAN	Q9H0H5	__Other	Q9H0H5	Q9H0H5	sp|Q9H0H5|RGAP1_HUMAN Rac GTPase-activating protein 1 OS=Homo sapiens OX=9606 GN=RACGAP1 PE=1 SV=1	0.999833	37.7831	0.00241059	78.77	54.435	+	1	CVNEIEQRGLTETGLYRISGCDRTVKELKEK	X;X;X;X;X;X;X;X;X;X;X;X;X;X;X;Phospho (STY);X;X;X;X;X;X;X;X;X;X;X;X;X;X;X	XXXXXXXXPPPPPPPPPXXXXXXXXXXXXXX	GLTETGLY(1)R	GLT(-64.61)ET(-37.78)GLY(37.78)R	8	2	0.58995	---	---	2508	981	384	384	2963	4105	20191107_Haura_KRAS-G12C_TMT-Batch1-H358-pY_run2	12133	2963	4105	20191107_Haura_KRAS-G12C_TMT-Batch1-H358-pY_run2	12133	2963	4105	20191107_Haura_KRAS-G12C_TMT-Batch1-H358-pY_run2	12133	Phosphorylation (STY)	1	GLTETGLpYR	8>>n	384>>n	1	1	GLTETGLYR	GLTETGLpYR;Q9H0H5;CVNEIEQRGLTETGLYRISGCDRTVKELKEK;8;1;8>>n	ph_Q9H0H5:384
sp|P68371|TBB4B_HUMAN	sp|P68371|TBB4B_HUMAN	P68371	__Other	P68371	P68371	sp|P68371|TBB4B_HUMAN Tubulin beta-4B chain OS=Homo sapiens OX=9606 GN=TUBB4B PE=1 SV=1	0.929586	11.2063	0.000958101	119.76	94.547	+	1	TYHGDSDLQLERINVYYNEATGGKYVPRAVL	X;X;X;X;X;X;X;X;X;X;X;X;X;X;X;Phospho (STY);X;X;X;X;X;X;X;X;X;X;X;X;X;X;X	XXXXXXXXXXXXPPPPPPPPPPPPXXXXXXX	INVY(0.93)Y(0.07)NEATGGK	INVY(11.21)Y(-11.21)NEAT(-79.76)GGK	4	3	1.7137	---	---	1737	529	50	50	4072	5903	20191112_Haura_KRAS-G12C_TMT-Batch2-Calu1-pY_run2	14043	4071	5902	20191112_Haura_KRAS-G12C_TMT-Batch2-Calu1-pY_run1	13952	4072	5903	20191112_Haura_KRAS-G12C_TMT-Batch2-Calu1-pY_run2	14043	Phosphorylation (STY)	1	INVpYYNEATGGK	4>>n	50>>n	0.93	0.93	INVYYNEATGGK	INVpYYNEATGGK;P68371;TYHGDSDLQLERINVYYNEATGGKYVPRAVL;4;1;4>>n	ph_P68371:50
sp|Q5VY43|PEAR1_HUMAN	sp|Q5VY43|PEAR1_HUMAN	Q5VY43	__Other	Q5VY43	Q5VY43	sp|Q5VY43|PEAR1_HUMAN Platelet endothelial aggregation receptor 1 OS=Homo sapiens OX=9606 GN=PEAR1 PE=1 SV=1	0.514429	0	1.38963e-05	70.666	61.166	---	2	GGPRESSYMEMKGPPSGSPPRQPPQFWDSQR	X;X;X;X;X;X;X;Phospho (STY);Oxidation (M);X;Oxidation (M);X;X;X;X;Phospho (STY);X;X;X;X;X;X;X;X;X;X;X;X;X;X;X	XXXXPPPPPPPPPPPPPPPPPPPPPPPPPPP	ES(0.054)S(0.295)Y(0.651)MEMKGPPS(0.514)GS(0.485)PPRQPPQFWDSQR	ES(-10.49)S(-3.09)Y(3.09)MEMKGPPS(0)GS(0)PPRQPPQFWDS(-53.38)QR	12	4	-0.81607	---	---	343	714	951	951	2216	2982	20191112_Haura_KRAS-G12C_TMT-Batch2-Calu1-pY_run2	14525	2216	2982	20191112_Haura_KRAS-G12C_TMT-Batch2-Calu1-pY_run2	14525	2216	2982	20191112_Haura_KRAS-G12C_TMT-Batch2-Calu1-pY_run2	14525	Phosphorylation (STY)	2	ESSpYMEMKGPPpSGSPPRQPPQFWDSQR	4>12,n	943>951,n	0.514	0.335	ESSYMEMKGPPSGSPPRQPPQFWDSQR	ESSpYMEMKGPPpSGSPPRQPPQFWDSQR;Q5VY43;GGPRESSYMEMKGPPSGSPPRQPPQFWDSQR;12;2;4>12,n	ph_Q5VY43:951
sp|Q5VT25|MRCKA_HUMAN	sp|Q5VT25|MRCKA_HUMAN	Q5VT25	__Other	Q5VT25	Q5VT25	sp|Q5VT25|MRCKA_HUMAN Serine/threonine-protein kinase MRCK alpha OS=Homo sapiens OX=9606 GN=CDC42BPA PE=1 SV=1	0.540861	1.24691	0.0168394	86.624	55.252	---	1	SAQNGSALKREFSGGSYSAKRQPMPSPSEGS	X;X;X;X;X;X;X;X;X;X;X;X;X;X;X;Phospho (STY);X;X;X;X;X;X;X;X;X;X;X;X;X;X;X	XXXXXXXXXXPPPPPPPPPPXXXXXXXXXXX	EFS(0.001)GGS(0.541)Y(0.406)S(0.052)AK	EFS(-26.82)GGS(1.25)Y(-1.25)S(-10.16)AK	6	2	-1.2574	---	---	339	710	1654	1654	1868	2525	20191112_Haura_KRAS-G12C_TMT-Batch2-Calu1-pY_run2	10588	1868	2525	20191112_Haura_KRAS-G12C_TMT-Batch2-Calu1-pY_run2	10588	1868	2525	20191112_Haura_KRAS-G12C_TMT-Batch2-Calu1-pY_run2	10588	Phosphorylation (STY)	1	EFSGGpSYSAK	6>n	1654>n	0.541	0.541	EFSGGSYSAK	EFSGGpSYSAK;Q5VT25;SAQNGSALKREFSGGSYSAKRQPMPSPSEGS;6;1;6>n	ph_Q5VT25:1654
sp|P05023|AT1A1_HUMAN	sp|P05023|AT1A1_HUMAN	P05023	__Other	P05023	P05023	sp|P05023|AT1A1_HUMAN Sodium/potassium-transporting ATPase subunit alpha-1 OS=Homo sapiens OX=9606 GN=ATP1A1 PE=1 SV=1	0.999947	42.7912	0.00646942	48.823	36.537	+	1	______MGKGVGRDKYEPAAVSEQGDKKGKK	X;X;X;X;X;X;X;X;X;X;X;X;X;X;X;Phospho (STY);X;X;X;X;X;X;X;X;X;X;X;X;X;X;X	XXXXXXXXXXXXXPPPPPPPPPPPPPPPXXX	DKY(1)EPAAVSEQGDKK	DKY(42.79)EPAAVS(-42.79)EQGDKK	3	4	3.7809	---	---	1260	258	10	10	1325	1777	20191107_Haura_KRAS-G12C_TMT-Batch1-H358-pY_run1	9624	1325	1777	20191107_Haura_KRAS-G12C_TMT-Batch1-H358-pY_run1	9624	1325	1777	20191107_Haura_KRAS-G12C_TMT-Batch1-H358-pY_run1	9624	Phosphorylation (STY)	1	DKpYEPAAVSEQGDKK	3>>n	10>>n	1	1	DKYEPAAVSEQGDKK	DKpYEPAAVSEQGDKK;P05023;______MGKGVGRDKYEPAAVSEQGDKKGKK;3;1;3>>n	ph_P05023:10
sp|Q9BSA4|TTYH2_HUMAN	sp|Q9BSA4|TTYH2_HUMAN	Q9BSA4	__Other	Q9BSA4	Q9BSA4	sp|Q9BSA4|TTYH2_HUMAN Protein tweety homolog 2 OS=Homo sapiens OX=9606 GN=TTYH2 PE=1 SV=3	1	71.223	0.00407056	71.223	42.136	+	1	SEYMNQAMLFGRNPRYENVPLIGRASPPPTY	X;X;X;X;X;X;X;X;X;X;X;X;X;X;X;Phospho (STY);X;X;X;X;X;X;X;X;X;X;X;X;X;X;X	XXXXXXXXXXXXXXXPPPPPPPPPXXXXXXX	Y(1)ENVPLIGR	Y(71.22)ENVPLIGR	1	2	1.8426	---	---	2473	954	494	494	9875	14015	20191113_Haura_KRAS-G12C_TMT-Batch3-H1792-pY_run2	14048	9875	14015	20191113_Haura_KRAS-G12C_TMT-Batch3-H1792-pY_run2	14048	9875	14015	20191113_Haura_KRAS-G12C_TMT-Batch3-H1792-pY_run2	14048	Phosphorylation (STY)	1	pYENVPLIGR	1,x	494,x	1	1	YENVPLIGR	pYENVPLIGR;Q9BSA4;SEYMNQAMLFGRNPRYENVPLIGRASPPPTY;1;1;1,x	ph_Q9BSA4:494
sp|O15031|PLXB2_HUMAN	sp|O15031|PLXB2_HUMAN	O15031	__Other	O15031	O15031	sp|O15031|PLXB2_HUMAN Plexin-B2 OS=Homo sapiens OX=9606 GN=PLXNB2 PE=1 SV=3	0.990428	20.8787	0.00671717	66.258	28.882	+	1	GSVKEKERTKAITEIYLTRLLSVKGTLQQFV	X;X;X;X;X;X;X;X;X;X;X;X;X;X;X;Phospho (STY);X;X;X;X;X;X;X;X;X;X;X;X;X;X;X	XXXXXXXXXXPPPPPPPPPXXXXXXXXXXXX	AIT(0.001)EIY(0.99)LT(0.008)R	AIT(-28.25)EIY(20.88)LT(-20.88)R	6	2	-1.234	---	---	1087	146	1621	1621	389	583	20191107_Haura_KRAS-G12C_TMT-Batch1-H358-pY_run2	15212	388	582	20191107_Haura_KRAS-G12C_TMT-Batch1-H358-pY_run1	15223	388	582	20191107_Haura_KRAS-G12C_TMT-Batch1-H358-pY_run1	15223	Phosphorylation (STY)	1	AITEIpYLTR	6>>n	1621>>n	0.99	0.99	AITEIYLTR	AITEIpYLTR;O15031;GSVKEKERTKAITEIYLTRLLSVKGTLQQFV;6;1;6>>n	ph_O15031:1621
sp|Q96LB3|IFT74_HUMAN	sp|Q96LB3|IFT74_HUMAN	Q96LB3	__Other	Q96LB3	Q96LB3	sp|Q96LB3|IFT74_HUMAN Intraflagellar transport protein 74 homolog OS=Homo sapiens OX=9606 GN=IFT74 PE=1 SV=1	0.952885	13.1858	0.00438729	57.802	37.421	+	1	FAMKEFIATKSQESDYQPIKKNVTKQIAEYN	X;X;X;X;X;X;X;X;X;X;X;X;X;X;X;Phospho (STY);X;X;X;X;X;X;X;X;X;X;X;X;X;X;X	XXXXXXXXXXPPPPPPPPPPPXXXXXXXXXX	S(0.001)QES(0.046)DY(0.953)QPIKK	S(-28.46)QES(-13.19)DY(13.19)QPIKK	6	3	4.1523	---	---	2373	919	572	572	7689	10886	20191112_Haura_KRAS-G12C_TMT-Batch2-Calu1-pY_run1	9645	7689	10886	20191112_Haura_KRAS-G12C_TMT-Batch2-Calu1-pY_run1	9645	7689	10886	20191112_Haura_KRAS-G12C_TMT-Batch2-Calu1-pY_run1	9645	Phosphorylation (STY)	1	SQESDpYQPIKK	6>>n	572>>n	0.953	0.953	SQESDYQPIKK	SQESDpYQPIKK;Q96LB3;FAMKEFIATKSQESDYQPIKKNVTKQIAEYN;6;1;6>>n	ph_Q96LB3:572
sp|P14866|HNRPL_HUMAN	sp|P14866|HNRPL_HUMAN	P14866	__Other	P14866	P14866	sp|P14866|HNRPL_HUMAN Heterogeneous nuclear ribonucleoprotein L OS=Homo sapiens OX=9606 GN=HNRNPL PE=1 SV=2	0.523445	0.794253	0.00985234	57.019	46.19	---	1	AAGGGGGGGRYYGGGSEGGRAPKRLKTDNAG	X;X;X;X;X;X;X;X;X;X;X;X;X;X;X;Phospho (STY);X;X;X;X;X;X;X;X;X;X;X;X;X;X;X	XXXXXXXXXXPPPPPPPPPPPPPXXXXXXXX	Y(0.436)Y(0.041)GGGS(0.523)EGGRAPK	Y(-0.79)Y(-11.1)GGGS(0.79)EGGRAPK	6	3	0.34936	---	---	158	323	52	52	10555	14919	20191112_Haura_KRAS-G12C_TMT-Batch2-Calu1-pY_run2	8088	10555	14919	20191112_Haura_KRAS-G12C_TMT-Batch2-Calu1-pY_run2	8088	10555	14919	20191112_Haura_KRAS-G12C_TMT-Batch2-Calu1-pY_run2	8088	Phosphorylation (STY)	1	YYGGGpSEGGRAPK	6>n	52>n	0.523	0.523	YYGGGSEGGRAPK	YYGGGpSEGGRAPK;P14866;AAGGGGGGGRYYGGGSEGGRAPKRLKTDNAG;6;1;6>n	ph_P14866:52
sp|P07814|SYEP_HUMAN	sp|P07814|SYEP_HUMAN	P07814	__Other	P07814	P07814	sp|P07814|SYEP_HUMAN Bifunctional glutamate/proline--tRNA ligase OS=Homo sapiens OX=9606 GN=EPRS PE=1 SV=5	0.846617	7.98911	2.50146e-05	84.14	73.285	+	1	RGFFICDQPYEPVSPYSCKEAPCVLIYIPDG	X;X;X;X;X;X;X;X;X;X;X;X;X;X;X;Phospho (STY);X;X;X;X;X;X;X;X;X;X;X;X;X;X;X	XPPPPPPPPPPPPPPPPPPXXXXXXXXXXXX	GFFICDQPYEPVS(0.019)PY(0.847)S(0.135)CK	GFFICDQPY(-41.33)EPVS(-16.53)PY(7.99)S(-7.99)CK	15	3	0.826	---	---	1303	274	690	690	2777	3849	20191113_Haura_KRAS-G12C_TMT-Batch3-H1792-pY_run2	17922	2777	3849	20191113_Haura_KRAS-G12C_TMT-Batch3-H1792-pY_run2	17922	2777	3849	20191113_Haura_KRAS-G12C_TMT-Batch3-H1792-pY_run2	17922	Phosphorylation (STY)	1	GFFICDQPYEPVSPpYSCK	15>>n	690>>n	0.847	0.847	GFFICDQPYEPVSPYSCK	GFFICDQPYEPVSPpYSCK;P07814;RGFFICDQPYEPVSPYSCKEAPCVLIYIPDG;15;1;15>>n	ph_P07814:690
sp|P29317|EPHA2_HUMAN	sp|P29317|EPHA2_HUMAN	P29317	__Other	P29317	P29317	sp|P29317|EPHA2_HUMAN Ephrin type-A receptor 2 OS=Homo sapiens OX=9606 GN=EPHA2 PE=1 SV=2	0.984173	17.2431	2.75954e-39	231.71	192.49	---	1;2	EDVYFSKSEQLKPLKTYVDPHTYEDPNQAVL	X;X;X;Phospho (STY);X;Phospho (STY);X;Phospho (STY);X;X;X;X;X;X;X;Phospho (STY);X;X;X;X;X;Phospho (STY);Phospho (STY);X;X;X;X;X;X;X;X	XXXXXXXPPPPPPPPPPPPPPPPPPPPPPPP	S(0.001)EQLKPLKT(0.984)Y(0.015)VDPHT(0.288)Y(0.713)EDPNQAVLK	S(-31.26)EQLKPLKT(17.24)Y(-17.24)VDPHT(-4.14)Y(4.14)EDPNQAVLK	9	4	0.43843	---	---	700	398	587	587	7064	9951	20191112_Haura_KRAS-G12C_TMT-Batch2-Calu1-pY_run2	13871	8856	12449	20191112_Haura_KRAS-G12C_TMT-Batch2-Calu1-pY_run1	13249	8856	12449	20191112_Haura_KRAS-G12C_TMT-Batch2-Calu1-pY_run1	13249	Phosphorylation (STY)	2	SEQLKPLKpTYVDPHTpYEDPNQAVLK	9>16>>n	587>594>>n	0.984	0.702	SEQLKPLKTYVDPHTYEDPNQAVLK	SEQLKPLKpTYVDPHTpYEDPNQAVLK;P29317;EDVYFSKSEQLKPLKTYVDPHTYEDPNQAVL;9;2;9>16>>n	ph_P29317:587
sp|Q96KB5|TOPK_HUMAN	sp|Q96KB5|TOPK_HUMAN	Q96KB5	__Other	Q96KB5	Q96KB5	sp|Q96KB5|TOPK_HUMAN Lymphokine-activated killer T-cell-originated protein kinase OS=Homo sapiens OX=9606 GN=PBK PE=1 SV=3	1	124.669	0.000722043	134.57	123.64	+	1	SPWAVKKINPICNDHYRSVYQKRLMDEAKIL	X;X;X;X;X;X;X;X;X;X;X;X;X;X;X;Phospho (STY);X;X;X;X;X;X;X;X;X;X;X;X;X;X;X	XXXXXXPPPPPPPPPPPXXXXXXXXXXXXXX	KINPICNDHY(1)R	KINPICNDHY(124.67)R	10	4	-0.054095	---	---	2370	916	74	74	4389	6344	20191112_Haura_KRAS-G12C_TMT-Batch2-Calu1-pY_run2	9067	4062	5893	20191112_Haura_KRAS-G12C_TMT-Batch2-Calu1-pY_run2	9881	4062	5893	20191112_Haura_KRAS-G12C_TMT-Batch2-Calu1-pY_run2	9881	Phosphorylation (STY)	1	KINPICNDHpYR	10,x	74,x	1	1	KINPICNDHYR	KINPICNDHpYR;Q96KB5;SPWAVKKINPICNDHYRSVYQKRLMDEAKIL;10;1;10,x	ph_Q96KB5:74
sp|P10451|OSTP_HUMAN	sp|P10451|OSTP_HUMAN	P10451	__Other	P10451	P10451	sp|P10451|OSTP_HUMAN Osteopontin OS=Homo sapiens OX=9606 GN=SPP1 PE=1 SV=1	0.999999	61.1148	0.000334617	136.75	101.24	+	1	VPTVDTYDGRGDSVVYGLRSKSKKFRRPDIQ	X;X;X;X;X;X;X;X;X;X;X;X;X;X;X;Phospho (STY);X;X;X;X;X;X;X;X;X;X;X;X;X;X;X	XXXXXXXXXXPPPPPPPPPXXXXXXXXXXXX	GDSVVY(1)GLR	GDS(-61.11)VVY(61.11)GLR	6	2	1.6391	---	---	1364	299	165	165	2725	3659	20191113_Haura_KRAS-G12C_TMT-Batch3-H1792-pY_run1	12356	2726	3661	20191113_Haura_KRAS-G12C_TMT-Batch3-H1792-pY_run2	12423	2725	3659	20191113_Haura_KRAS-G12C_TMT-Batch3-H1792-pY_run1	12356	Phosphorylation (STY)	1	GDSVVpYGLR	6>>n	165>>n	1	1	GDSVVYGLR	GDSVVpYGLR;P10451;VPTVDTYDGRGDSVVYGLRSKSKKFRRPDIQ;6;1;6>>n	ph_P10451:165
sp|Q5XXA6|ANO1_HUMAN	sp|Q5XXA6|ANO1_HUMAN	Q5XXA6	__Other	Q5XXA6	Q5XXA6	sp|Q5XXA6|ANO1_HUMAN Anoctamin-1 OS=Homo sapiens OX=9606 GN=ANO1 PE=1 SV=1	0.783639	6.03254	0.00028498	141.48	111.3	+	1	_________MRVNEKYSTLPAEDRSVHIINI	X;X;X;X;X;X;X;X;X;X;X;X;X;X;X;Phospho (STY);X;X;X;X;X;X;X;X;X;X;X;X;X;X;X	XXXXXXXXXXXXXXXPPPPPPPPPXXXXXXX	Y(0.784)S(0.195)T(0.021)LPAEDR	Y(6.03)S(-6.03)T(-15.72)LPAEDR	1	2	-0.1101	---	---	2060	717	7	7	10390	14669	20191107_Haura_KRAS-G12C_TMT-Batch1-H358-pY_run2	9707	10389	14668	20191107_Haura_KRAS-G12C_TMT-Batch1-H358-pY_run1	9725	10389	14668	20191107_Haura_KRAS-G12C_TMT-Batch1-H358-pY_run1	9725	Phosphorylation (STY)	1	pYSTLPAEDR	1>>n	7>>n	0.784	0.784	YSTLPAEDR	pYSTLPAEDR;Q5XXA6;_________MRVNEKYSTLPAEDRSVHIINI;1;1;1>>n	ph_Q5XXA6:7
sp|Q8NAX2|KDF1_HUMAN	sp|Q8NAX2|KDF1_HUMAN	Q8NAX2	__Other	Q8NAX2	Q8NAX2	sp|Q8NAX2|KDF1_HUMAN Keratinocyte differentiation factor 1 OS=Homo sapiens OX=9606 GN=KDF1 PE=1 SV=2	0.905646	9.82198	0.010159	60.788	36.453	+	1	FSYPDVKLKGIPVYPYPRATSPAPDADSCCK	X;X;X;X;X;X;X;X;X;X;X;X;X;X;X;Phospho (STY);X;X;X;X;X;X;X;X;X;X;X;X;X;X;X	XXXXXXXXXPPPPPPPPPXXXXXXXXXXXXX	GIPVY(0.094)PY(0.906)PR	GIPVY(-9.82)PY(9.82)PR	7	2	1.3981	---	---	2219	822	174	174	2899	4006	20191107_Haura_KRAS-G12C_TMT-Batch1-H358-pY_run1	13915	2899	4006	20191107_Haura_KRAS-G12C_TMT-Batch1-H358-pY_run1	13915	2899	4006	20191107_Haura_KRAS-G12C_TMT-Batch1-H358-pY_run1	13915	Phosphorylation (STY)	1	GIPVYPpYPR	7>>n	174>>n	0.906	0.906	GIPVYPYPR	GIPVYPpYPR;Q8NAX2;FSYPDVKLKGIPVYPYPRATSPAPDADSCCK;7;1;7>>n	ph_Q8NAX2:174
sp|Q14118|DAG1_HUMAN	sp|Q14118|DAG1_HUMAN	Q14118	__Other	Q14118	Q14118	sp|Q14118|DAG1_HUMAN Dystroglycan OS=Homo sapiens OX=9606 GN=DAG1 PE=1 SV=2	0.634973	2.42112	7.65893e-05	145.89	119.29	---	1	MEGKGSRPKNMTPYRSPPPYVPP________	X;X;X;X;X;X;X;X;X;X;X;X;X;X;X;Phospho (STY);X;X;X;X;X;X;X;X;X;X;X;X;X;X;X	XXXXXXXXXPPPPPPPPPPPPPPXXXXXXXX	NMT(0.001)PY(0.364)RS(0.635)PPPYVPP	NMT(-26.54)PY(-2.42)RS(2.42)PPPY(-57.99)VPP	7	2	-0.1536	---	---	302	633	888	888	5893	8441	20191112_Haura_KRAS-G12C_TMT-Batch2-Calu1-pY_run1	13235	5891	8436	20191107_Haura_KRAS-G12C_TMT-Batch1-H358-pY_run2	13332	5891	8436	20191107_Haura_KRAS-G12C_TMT-Batch1-H358-pY_run2	13332	Phosphorylation (STY)	1	NMTPYRpSPPPYVPP	7>n	888>n	0.635	0.635	NMTPYRSPPPYVPP	NMTPYRpSPPPYVPP;Q14118;MEGKGSRPKNMTPYRSPPPYVPP________;7;1;7>n	ph_Q14118:888
sp|O43609|SPY1_HUMAN	sp|O43609|SPY1_HUMAN	O43609	__Other	O43609	O43609	sp|O43609|SPY1_HUMAN Protein sprouty homolog 1 OS=Homo sapiens OX=9606 GN=SPRY1 PE=1 SV=2	0.987706	19.104	0.000121775	137.59	100.48	---	1	ILSLDQIKAIRGSNEYTEGPSVVKRPAPRTA	X;X;X;X;X;X;X;X;X;X;X;X;X;X;X;Phospho (STY);X;X;X;X;X;X;X;X;X;X;X;X;X;X;X	XXXXXXXXXXXPPPPPPPPPPPPPXXXXXXX	GSNEY(0.988)T(0.012)EGPSVVK	GS(-38.06)NEY(19.1)T(-19.1)EGPS(-79.22)VVK	5	2	2.2592	---	---	1123	168	53	53	3200	4402	20191107_Haura_KRAS-G12C_TMT-Batch1-H358-pY_run2	11231	3200	4402	20191107_Haura_KRAS-G12C_TMT-Batch1-H358-pY_run2	11231	3200	4402	20191107_Haura_KRAS-G12C_TMT-Batch1-H358-pY_run2	11231	Phosphorylation (STY)	1	GSNEpYTEGPSVVK	5>>n	53>>n	0.988	0.988	GSNEYTEGPSVVK	GSNEpYTEGPSVVK;O43609;ILSLDQIKAIRGSNEYTEGPSVVKRPAPRTA;5;1;5>>n	ph_O43609:53
sp|P23193|TCEA1_HUMAN	sp|P23193|TCEA1_HUMAN	P23193	__Other	P23193	P23193	sp|P23193|TCEA1_HUMAN Transcription elongation factor A protein 1 OS=Homo sapiens OX=9606 GN=TCEA1 PE=1 SV=2	0.999899	40.0687	7.35582e-06	177.97	136.08	+	1	GNVSNRKDETNARDTYVSSFPRAPSTSDSVR	X;X;X;X;X;X;X;X;X;X;X;X;X;X;X;Phospho (STY);X;X;X;X;X;X;X;X;X;X;X;X;X;X;X	XXXXXXXXXXXXXPPPPPPPPPXXXXXXXXX	DTY(1)VSSFPR	DT(-40.07)Y(40.07)VS(-55.23)S(-94.22)FPR	3	2	0.048969	---	---	1476	372	126	126	1603	2182	20191112_Haura_KRAS-G12C_TMT-Batch2-Calu1-pY_run2	12098	1603	2182	20191112_Haura_KRAS-G12C_TMT-Batch2-Calu1-pY_run2	12098	1603	2182	20191112_Haura_KRAS-G12C_TMT-Batch2-Calu1-pY_run2	12098	Phosphorylation (STY)	1	DTpYVSSFPR	3>>n	126>>n	1	1	DTYVSSFPR	DTpYVSSFPR;P23193;GNVSNRKDETNARDTYVSSFPRAPSTSDSVR;3;1;3>>n	ph_P23193:126
sp|Q5TDH0|DDI2_HUMAN	sp|Q5TDH0|DDI2_HUMAN	Q5TDH0	__Other	Q5TDH0	Q5TDH0	sp|Q5TDH0|DDI2_HUMAN Protein DDI1 homolog 2 OS=Homo sapiens OX=9606 GN=DDI2 PE=1 SV=1	1	67.0552	0.0131063	67.055	26.109	+	1	TFLPEGELPECARLAYGAGREDVRPEEIADQ	X;X;X;X;X;X;X;X;X;X;X;X;X;X;X;Phospho (STY);X;X;X;X;X;X;X;X;X;X;X;X;X;X;X	XXXXXXXXXXXXXPPPPPPPXXXXXXXXXXX	LAY(1)GAGR	LAY(67.06)GAGR	3	2	0.08405	---	---	2051	709	366	366	4807	6858	20191107_Haura_KRAS-G12C_TMT-Batch1-H358-pY_run2	7614	4807	6858	20191107_Haura_KRAS-G12C_TMT-Batch1-H358-pY_run2	7614	4807	6858	20191107_Haura_KRAS-G12C_TMT-Batch1-H358-pY_run2	7614	Phosphorylation (STY)	1	LApYGAGR	3,x	366,x	1	1	LAYGAGR	LApYGAGR;Q5TDH0;TFLPEGELPECARLAYGAGREDVRPEEIADQ;3;1;3,x	ph_Q5TDH0:366
sp|Q9BYP7|WNK3_HUMAN	sp|Q9BYP7|WNK3_HUMAN	Q9BYP7;Q9H4A3;Q9Y3S1	__Other	Q9BYP7	Q9BYP7	sp|Q9BYP7|WNK3_HUMAN Serine/threonine-protein kinase WNK3 OS=Homo sapiens OX=9606 GN=WNK3 PE=1 SV=3;sp|Q9Y3S1|WNK2_HUMAN Serine/threonine-protein kinase WNK2 OS=Homo sapiens OX=9606 GN=WNK2 PE=1 SV=4;sp|Q9H4A3|WNK1_HUMAN Serine/threonine-protein kinase WNK	0.998195	27.4207	0.00895603	42.813	14.601	---	2	PPIIHRDLKCDNIFITGPTGSVKIGDLGLAT	X;X;X;X;X;X;X;X;X;X;X;X;X;X;X;Phospho (STY);X;X;Phospho (STY);X;X;X;X;X;X;X;X;X;X;X;X	XXXXXXPPPPPPPPPPPPPPPPPXXXXXXXX	DLKCDNIFIT(0.998)GPT(0.998)GS(0.004)VK	DLKCDNIFIT(27.42)GPT(27.42)GS(-27.42)VK	10	4	-1.0141	---	---	901	967	284	284	1337	1789	20191112_Haura_KRAS-G12C_TMT-Batch2-Calu1-pY_run2	12272	1337	1789	20191112_Haura_KRAS-G12C_TMT-Batch2-Calu1-pY_run2	12272	1337	1789	20191112_Haura_KRAS-G12C_TMT-Batch2-Calu1-pY_run2	12272	Phosphorylation (STY)	2	DLKCDNIFIpTGPpTGSVK	10,13>>n	284,287>>n	0.998	0.996	DLKCDNIFITGPTGSVK	DLKCDNIFIpTGPpTGSVK;Q9BYP7;Q9H4A3;Q9Y3S1;PPIIHRDLKCDNIFITGPTGSVKIGDLGLAT;10;2;10,13>>n	ph_Q9BYP7:284
sp|Q9BYP7|WNK3_HUMAN	sp|Q9BYP7|WNK3_HUMAN	Q9BYP7;Q9H4A3;Q9Y3S1	__Other	Q9BYP7	Q9BYP7	sp|Q9BYP7|WNK3_HUMAN Serine/threonine-protein kinase WNK3 OS=Homo sapiens OX=9606 GN=WNK3 PE=1 SV=3;sp|Q9Y3S1|WNK2_HUMAN Serine/threonine-protein kinase WNK2 OS=Homo sapiens OX=9606 GN=WNK2 PE=1 SV=4;sp|Q9H4A3|WNK1_HUMAN Serine/threonine-protein kinase WNK	0.998195	27.4207	0.00895603	42.813	14.601	---	2	IHRDLKCDNIFITGPTGSVKIGDLGLATLMR	X;X;X;X;X;X;X;X;X;X;X;X;Phospho (STY);X;X;Phospho (STY);X;X;X;X;X;X;X;X;X;X;X;X;X;X;X	XXXPPPPPPPPPPPPPPPPPXXXXXXXXXXX	DLKCDNIFIT(0.998)GPT(0.998)GS(0.004)VK	DLKCDNIFIT(27.42)GPT(27.42)GS(-27.42)VK	13	4	-1.0141	---	---	902	967	287	287	1337	1789	20191112_Haura_KRAS-G12C_TMT-Batch2-Calu1-pY_run2	12272	1337	1789	20191112_Haura_KRAS-G12C_TMT-Batch2-Calu1-pY_run2	12272	1337	1789	20191112_Haura_KRAS-G12C_TMT-Batch2-Calu1-pY_run2	12272	Phosphorylation (STY)	2	DLKCDNIFIpTGPpTGSVK	10,13>>n	284,287>>n	0.998	0.996	DLKCDNIFITGPTGSVK	DLKCDNIFIpTGPpTGSVK;Q9BYP7;Q9H4A3;Q9Y3S1;IHRDLKCDNIFITGPTGSVKIGDLGLATLMR;13;2;10,13>>n	ph_Q9BYP7:287
sp|P55287|CAD11_HUMAN	sp|P55287|CAD11_HUMAN	P55287	__Other	P55287	P55287	sp|P55287|CAD11_HUMAN Cadherin-11 OS=Homo sapiens OX=9606 GN=CDH11 PE=1 SV=2	0.906075	9.84383	0.000571494	82.34	42.679	+	1	DGINGFIPRKDIKPEYQYMPRPGLRPAPNSV	X;X;X;X;X;X;X;X;X;X;X;X;X;X;X;Phospho (STY);X;X;X;X;X;X;X;X;X;X;X;X;X;X;X	XXXXXXXXXPPPPPPPPPPPPXXXXXXXXXX	KDIKPEY(0.906)QY(0.094)MPR	KDIKPEY(9.84)QY(-9.84)MPR	7	4	2.9396	---	---	1677	493	700	700	4275	6206	20191107_Haura_KRAS-G12C_TMT-Batch1-H358-pY_run2	11438	4275	6206	20191107_Haura_KRAS-G12C_TMT-Batch1-H358-pY_run2	11438	4275	6206	20191107_Haura_KRAS-G12C_TMT-Batch1-H358-pY_run2	11438	Phosphorylation (STY)	1	KDIKPEpYQYMPR	7>>n	700>>n	0.906	0.906	KDIKPEYQYMPR	KDIKPEpYQYMPR;P55287;DGINGFIPRKDIKPEYQYMPRPGLRPAPNSV;7;1;7>>n	ph_P55287:700
sp|Q99755|PI51A_HUMAN	sp|Q99755|PI51A_HUMAN	A2A3N6;Q99755	__Other	Q99755	Q99755	sp|Q99755|PI51A_HUMAN Phosphatidylinositol 4-phosphate 5-kinase type-1 alpha OS=Homo sapiens OX=9606 GN=PIP5K1A PE=1 SV=1;sp|A2A3N6|PIPSL_HUMAN Putative PIP5K1A and PSMD4-like protein OS=Homo sapiens OX=9606 GN=PIPSL PE=5 SV=1	0.991755	21.2471	6.2321e-06	144.27	119.09	+	1	QYSVDTRRPAPQKALYSTAMESIQGEARRGG	X;X;X;X;X;X;X;X;X;X;X;X;X;X;X;Phospho (STY);X;X;X;X;X;X;X;X;X;X;X;X;X;X;X	XXXXXXXXXXXXXPPPPPPPPPPPPPPPXXX	ALY(0.992)S(0.007)T(0.001)AMESIQGEAR	ALY(21.25)S(-21.25)T(-30.92)AMES(-99.81)IQGEAR	3	3	-1.7515	---	---	2453	946	360	360	516	735	20191107_Haura_KRAS-G12C_TMT-Batch1-H358-pY_run1	14676	516	735	20191107_Haura_KRAS-G12C_TMT-Batch1-H358-pY_run1	14676	516	735	20191107_Haura_KRAS-G12C_TMT-Batch1-H358-pY_run1	14676	Phosphorylation (STY)	1	ALpYSTAMESIQGEAR	3>>n	360>>n	0.992	0.992	ALYSTAMESIQGEAR	ALpYSTAMESIQGEAR;A2A3N6;Q99755;QYSVDTRRPAPQKALYSTAMESIQGEARRGG;3;1;3>>n	ph_Q99755:360
sp|P15924|DESP_HUMAN	sp|P15924|DESP_HUMAN	P15924	__Other	P15924	P15924	sp|P15924|DESP_HUMAN Desmoplakin OS=Homo sapiens OX=9606 GN=DSP PE=1 SV=3	0.999833	40.9226	1.98347e-11	124.18	111.04	+	1;2	YYSRRGVITDQNSDGYCQTGTMSRHQNQNTI	X;X;X;X;X;X;X;X;X;X;X;X;Phospho (STY);X;X;Phospho (STY);X;X;X;X;X;Oxidation (M);X;X;X;X;X;X;X;X;X	XXXXXPPPPPPPPPPPPPPPPPPPXXXXXXX	GVITDQNSDGY(1)CQTGTMSR	GVIT(-70.4)DQNS(-40.92)DGY(40.92)CQT(-40.92)GT(-53.23)MS(-69.2)R	11	3	-1.6989	---	---	1403	330	56	56	3317	4568	20191107_Haura_KRAS-G12C_TMT-Batch1-H358-pY_run2	10910	3317	4568	20191107_Haura_KRAS-G12C_TMT-Batch1-H358-pY_run2	10910	3317	4568	20191107_Haura_KRAS-G12C_TMT-Batch1-H358-pY_run2	10910	Phosphorylation (STY)	1	GVITDQNSDGpYCQTGTMSR	11>>n	56>>n	1	1	GVITDQNSDGYCQTGTMSR	GVITDQNSDGpYCQTGTMSR;P15924;YYSRRGVITDQNSDGYCQTGTMSRHQNQNTI;11;1;11>>n	ph_P15924:56
sp|Q7Z699|SPRE1_HUMAN	sp|Q7Z699|SPRE1_HUMAN	Q7Z699	__Other	Q7Z699	Q7Z699	sp|Q7Z699|SPRE1_HUMAN Sprouty-related, EVH1 domain-containing protein 1 OS=Homo sapiens OX=9606 GN=SPRED1 PE=1 SV=2	0.96233	14.2711	0.000142887	128.96	99.986	---	1	DADSSIQFSKPDSKKSDYLYSCGDETKLSSP	X;X;X;X;X;X;X;X;X;X;X;X;X;X;X;Phospho (STY);X;X;X;X;X;X;X;X;X;X;X;X;X;X;X	XXXXXXXXXXXXXXPPPPPPPPPPPPPXXXX	KS(0.962)DY(0.036)LY(0.002)SCGDETK	KS(14.27)DY(-14.27)LY(-27.66)S(-45.46)CGDET(-94.24)K	2	3	2.3827	---	---	365	761	290	290	4575	6579	20191107_Haura_KRAS-G12C_TMT-Batch1-H358-pY_run1	11425	4575	6579	20191107_Haura_KRAS-G12C_TMT-Batch1-H358-pY_run1	11425	4575	6579	20191107_Haura_KRAS-G12C_TMT-Batch1-H358-pY_run1	11425	Phosphorylation (STY)	1	KpSDYLYSCGDETK	2>>n	290>>n	0.962	0.962	KSDYLYSCGDETK	KpSDYLYSCGDETK;Q7Z699;DADSSIQFSKPDSKKSDYLYSCGDETKLSSP;2;1;2>>n	ph_Q7Z699:290
sp|Q8WUM4|PDC6I_HUMAN	sp|Q8WUM4|PDC6I_HUMAN	Q8WUM4	__Other	Q8WUM4	Q8WUM4	sp|Q8WUM4|PDC6I_HUMAN Programmed cell death 6-interacting protein OS=Homo sapiens OX=9606 GN=PDCD6IP PE=1 SV=1	0.889479	9.05689	0.0355085	47.849	12.749	+	1	HAAELIKTVASRYDEYVNVKDFSDKINRALA	X;X;X;X;X;X;X;X;X;X;X;X;X;X;X;Phospho (STY);X;X;X;X;X;X;X;X;X;X;X;X;X;X;X	XXXXXXXXXXXXPPPPPPPPXXXXXXXXXXX	Y(0.111)DEY(0.889)VNVK	Y(-9.06)DEY(9.06)VNVK	4	2	2.0155	---	---	2281	858	294	294	9856	13994	20191107_Haura_KRAS-G12C_TMT-Batch1-H358-pY_run1	12779	9856	13994	20191107_Haura_KRAS-G12C_TMT-Batch1-H358-pY_run1	12779	9856	13994	20191107_Haura_KRAS-G12C_TMT-Batch1-H358-pY_run1	12779	Phosphorylation (STY)	1	YDEpYVNVK	4>>n	294>>n	0.889	0.889	YDEYVNVK	YDEpYVNVK;Q8WUM4;HAAELIKTVASRYDEYVNVKDFSDKINRALA;4;1;4>>n	ph_Q8WUM4:294
sp|Q9UQB8|BAIP2_HUMAN	sp|Q9UQB8|BAIP2_HUMAN	Q9UQB8	__Other	Q9UQB8	Q9UQB8	sp|Q9UQB8|BAIP2_HUMAN Brain-specific angiogenesis inhibitor 1-associated protein 2 OS=Homo sapiens OX=9606 GN=BAIAP2 PE=1 SV=1	0.568922	2.17175	0.00117029	130.98	89.33	---	1	SLSPPQSQSKLSDSYSNTLPVRKSVTPKNSY	X;X;X;X;X;X;X;X;X;X;X;X;X;X;X;Phospho (STY);X;X;X;X;X;X;X;X;X;X;X;X;X;Phospho (STY);Phospho (STY)	XXXXXXXXXXPPPPPPPPPPPPXXXXXXXXX	LSDS(0.066)Y(0.345)S(0.569)NT(0.02)LPVR	LS(-40.87)DS(-9.38)Y(-2.17)S(2.17)NT(-14.46)LPVR	6	2	0.73988	---	---	575	1106	338	338	5215	7555	20191107_Haura_KRAS-G12C_TMT-Batch1-H358-pY_run2	13140	5215	7555	20191107_Haura_KRAS-G12C_TMT-Batch1-H358-pY_run2	13140	5219	7559	20191112_Haura_KRAS-G12C_TMT-Batch2-Calu1-pY_run2	13227	Phosphorylation (STY)	1	LSDSYpSNTLPVR	6>n	338>n	0.569	0.569	LSDSYSNTLPVR	LSDSYpSNTLPVR;Q9UQB8;SLSPPQSQSKLSDSYSNTLPVRKSVTPKNSY;6;1;6>n	ph_Q9UQB8:338
sp|O75056|SDC3_HUMAN	sp|O75056|SDC3_HUMAN	O75056	__Other	O75056	O75056	sp|O75056|SDC3_HUMAN Syndecan-3 OS=Homo sapiens OX=9606 GN=SDC3 PE=1 SV=2	1	102.317	5.39053e-16	182.15	171.16	+	1	QASVTYQKPDKQEEFYA______________	X;X;X;X;X;X;X;X;X;X;X;X;X;X;X;Phospho (STY);X;X;X;X;X;X;X;X;X;X;X;X;X;X;X	PPPPPPPPPPPPPPPPPXXXXXXXXXXXXXX	QASVTYQKPDKQEEFY(1)A	QAS(-126.31)VT(-104.93)Y(-102.32)QKPDKQEEFY(102.32)A	16	4	0.20247	---	---	1171	195	441	441	6219	8835	20191112_Haura_KRAS-G12C_TMT-Batch2-Calu1-pY_run1	12426	6219	8835	20191112_Haura_KRAS-G12C_TMT-Batch2-Calu1-pY_run1	12426	6219	8835	20191112_Haura_KRAS-G12C_TMT-Batch2-Calu1-pY_run1	12426	Phosphorylation (STY)	1	QASVTYQKPDKQEEFpYA	16>>n	441>>n	1	1	QASVTYQKPDKQEEFYA	QASVTYQKPDKQEEFpYA;O75056;QASVTYQKPDKQEEFYA______________;16;1;16>>n	ph_O75056:441
sp|Q8TEW0|PARD3_HUMAN	sp|Q8TEW0|PARD3_HUMAN	Q8TEW0	__Other	Q8TEW0	Q8TEW0	sp|Q8TEW0|PARD3_HUMAN Partitioning defective 3 homolog OS=Homo sapiens OX=9606 GN=PARD3 PE=1 SV=2	0.508441	0.710498	1.08128e-09	115.15	100.12	---	1	FQQAKQDEDVEDRRRTYSFEQPWPNARPATQ	X;X;X;X;X;X;X;X;X;X;X;X;X;X;X;Phospho (STY);X;X;X;X;X;X;X;X;X;X;X;X;X;X;X	XXXXXXXXXXXXXXXPPPPPPPPPPPPPPPP	T(0.508)Y(0.432)S(0.06)FEQPWPNARPATQSGR	T(0.71)Y(-0.71)S(-9.29)FEQPWPNARPAT(-86.38)QS(-87.87)GR	1	3	1.0891	---	---	857	850	1176	1176	8822	12393	20191112_Haura_KRAS-G12C_TMT-Batch2-Calu1-pY_run2	12823	8821	12392	20191112_Haura_KRAS-G12C_TMT-Batch2-Calu1-pY_run1	12711	8821	12392	20191112_Haura_KRAS-G12C_TMT-Batch2-Calu1-pY_run1	12711	Phosphorylation (STY)	1	pTYSFEQPWPNARPATQSGR	1>n	1176>n	0.508	0.508	TYSFEQPWPNARPATQSGR	pTYSFEQPWPNARPATQSGR;Q8TEW0;FQQAKQDEDVEDRRRTYSFEQPWPNARPATQ;1;1;1>n	ph_Q8TEW0:1176
sp|O60716|CTND1_HUMAN	sp|O60716|CTND1_HUMAN	O60716	__Other	O60716	O60716	sp|O60716|CTND1_HUMAN Catenin delta-1 OS=Homo sapiens OX=9606 GN=CTNND1 PE=1 SV=1	0.612405	1.90702	2.98356e-11	176.84	149.76	---	2	DLKLNGPQDHSHLLYSTIPRMQEPGQIVETY	X;X;X;X;X;X;X;X;X;X;X;X;X;X;Phospho (STY);Phospho (STY);X;X;X;X;X;X;X;X;X;X;X;X;X;X;X	XXXPPPPPPPPPPPPPPPPPXXXXXXXXXXX	LNGPQDHSHLLY(0.989)S(0.612)T(0.399)IPR	LNGPQDHS(-70.9)HLLY(17.33)S(1.91)T(-1.91)IPR	13	3	-1.3619	---	---	74	189	97	97	5084	7349	20191113_Haura_KRAS-G12C_TMT-Batch3-H1792-pY_run2	12800	5078	7343	20191112_Haura_KRAS-G12C_TMT-Batch2-Calu1-pY_run1	12829	5078	7343	20191112_Haura_KRAS-G12C_TMT-Batch2-Calu1-pY_run1	12829	Phosphorylation (STY)	2	LNGPQDHSHLLpYpSTIPR	12>>13>n	96>>97>n	0.612	0.605	LNGPQDHSHLLYSTIPR	LNGPQDHSHLLpYpSTIPR;O60716;DLKLNGPQDHSHLLYSTIPRMQEPGQIVETY;13;2;12>>13>n	ph_O60716:97
sp|Q86XX4|FRAS1_HUMAN	sp|Q86XX4|FRAS1_HUMAN	Q86XX4	__Other	Q86XX4	Q86XX4	sp|Q86XX4|FRAS1_HUMAN Extracellular matrix protein FRAS1 OS=Homo sapiens OX=9606 GN=FRAS1 PE=1 SV=2	0.974976	15.9064	0.00141746	123.11	91.284	+	1	PKRHPDRVEKNVNRHYCTVRNVNILSEPEAA	X;X;X;X;X;X;X;X;X;X;X;X;X;X;X;Phospho (STY);X;X;X;X;X;X;X;X;X;X;X;X;X;X;X	XXXXXXXXXXPPPPPPPPPPXXXXXXXXXXX	NVNRHY(0.975)CT(0.025)VR	NVNRHY(15.91)CT(-15.91)VR	6	3	-2.2708	---	---	2152	778	3966	3966	6072	8648	20191112_Haura_KRAS-G12C_TMT-Batch2-Calu1-pY_run1	5146	6072	8648	20191112_Haura_KRAS-G12C_TMT-Batch2-Calu1-pY_run1	5146	6072	8648	20191112_Haura_KRAS-G12C_TMT-Batch2-Calu1-pY_run1	5146	Phosphorylation (STY)	1	NVNRHpYCTVR	6>>n	3966>>n	0.975	0.975	NVNRHYCTVR	NVNRHpYCTVR;Q86XX4;PKRHPDRVEKNVNRHYCTVRNVNILSEPEAA;6;1;6>>n	ph_Q86XX4:3966
sp|Q03135|CAV1_HUMAN	sp|Q03135|CAV1_HUMAN	Q03135	__Other	Q03135	Q03135	sp|Q03135|CAV1_HUMAN Caveolin-1 OS=Homo sapiens OX=9606 GN=CAV1 PE=1 SV=4	1	132.209	3.20774e-12	177.08	149.13	---	2	GNIYKPNNKAMADELSEKQVYDAHTKEIDLV	X;X;X;Phospho (STY);X;X;X;X;X;X;X;X;X;X;X;Phospho (STY);X;X;X;X;Phospho (STY);X;X;X;X;X;X;X;X;X;X	XXXXXXXXXPPPPPPPPPPPPPPPPPXXXXX	AMADELS(1)EKQVY(1)DAHTK	AMADELS(132.21)EKQVY(73.62)DAHT(-73.62)K	7	4	0.2537	---	---	242	563	37	37	526	746	20191112_Haura_KRAS-G12C_TMT-Batch2-Calu1-pY_run2	12282	524	744	20191112_Haura_KRAS-G12C_TMT-Batch2-Calu1-pY_run1	12160	524	744	20191112_Haura_KRAS-G12C_TMT-Batch2-Calu1-pY_run1	12160	Phosphorylation (STY)	2	AMADELpSEKQVpYDAHTK	7,12>>n	37,42>>n	1	1	AMADELSEKQVYDAHTK	AMADELpSEKQVpYDAHTK;Q03135;GNIYKPNNKAMADELSEKQVYDAHTKEIDLV;7;2;7,12>>n	ph_Q03135:37
sp|A6NI28|RHG42_HUMAN	sp|A6NI28|RHG42_HUMAN	A6NI28	__Other	A6NI28	A6NI28	sp|A6NI28|RHG42_HUMAN Rho GTPase-activating protein 42 OS=Homo sapiens OX=9606 GN=ARHGAP42 PE=1 SV=3	0.997738	26.5464	1.3221e-17	172	142.55	+	1	KMCRRLRLDTASSNGYQRPGSVVAAKAQLFE	X;X;X;X;X;X;X;X;X;X;X;X;X;X;X;Phospho (STY);X;X;X;X;X;X;X;X;X;X;X;X;X;X;X	XXXXXPPPPPPPPPPPPPPPPPPPPPXXXXX	LRLDTASSNGY(0.998)QRPGS(0.002)VVAAK	LRLDT(-65.33)AS(-58.72)S(-43)NGY(26.55)QRPGS(-26.55)VVAAK	11	4	2.3293	---	---	1028	109	792	792	5206	7546	20191112_Haura_KRAS-G12C_TMT-Batch2-Calu1-pY_run1	11281	5208	7548	20191113_Haura_KRAS-G12C_TMT-Batch3-H1792-pY_run2	11332	5208	7548	20191113_Haura_KRAS-G12C_TMT-Batch3-H1792-pY_run2	11332	Phosphorylation (STY)	1	LRLDTASSNGpYQRPGSVVAAK	11>>n	792>>n	0.998	0.998	LRLDTASSNGYQRPGSVVAAK	LRLDTASSNGpYQRPGSVVAAK;A6NI28;KMCRRLRLDTASSNGYQRPGSVVAAKAQLFE;11;1;11>>n	ph_A6NI28:792
sp|Q99959|PKP2_HUMAN	sp|Q99959|PKP2_HUMAN	Q99959	__Other	Q99959	Q99959	sp|Q99959|PKP2_HUMAN Plakophilin-2 OS=Homo sapiens OX=9606 GN=PKP2 PE=1 SV=2	1	57.1586	0.00609125	57.159	40.279	+	1	SIGCFGSRSRKVKEQYQDVPMPEEKSNPKGV	X;X;X;X;X;X;X;X;X;X;X;X;X;X;X;Phospho (STY);X;X;X;X;X;X;X;X;X;X;X;X;X;X;X	XXXXXXXXXXXPPPPPPPPPPPPPPXXXXXX	VKEQY(1)QDVPMPEEK	VKEQY(57.16)QDVPMPEEK	5	3	2.9612	---	---	2466	950	659	659	9215	13023	20191107_Haura_KRAS-G12C_TMT-Batch1-H358-pY_run2	12175	9215	13023	20191107_Haura_KRAS-G12C_TMT-Batch1-H358-pY_run2	12175	9215	13023	20191107_Haura_KRAS-G12C_TMT-Batch1-H358-pY_run2	12175	Phosphorylation (STY)	1	VKEQpYQDVPMPEEK	5,x	659,x	1	1	VKEQYQDVPMPEEK	VKEQpYQDVPMPEEK;Q99959;SIGCFGSRSRKVKEQYQDVPMPEEKSNPKGV;5;1;5,x	ph_Q99959:659
sp|P17302|CXA1_HUMAN	sp|P17302|CXA1_HUMAN	P17302	__Other	P17302	P17302	sp|P17302|CXA1_HUMAN Gap junction alpha-1 protein OS=Homo sapiens OX=9606 GN=GJA1 PE=1 SV=2	0.49999	0	4.269e-15	112.54	102.96	---	1	GALSPAKDCGSQKYAYFNGCSSPTAPLSPMS	X;X;X;X;X;X;X;X;X;X;X;X;X;X;X;X;X;X;X;X;X;X;X;X;X;X;X;X;X;X;X	XXXXXXXXXXXXXXXXXXXXXXXXXXXXXXX	Y(0.5)AY(0.5)FNGCSSPTAPLSPMSPPGYK	Y(0)AY(0)FNGCS(-44.68)S(-52.27)PT(-66.76)APLS(-85.7)PMS(-99.61)PPGY(-111.58)K	3	3	-0.36408	---	---	1420	341	267	267	9824	13952	20191112_Haura_KRAS-G12C_TMT-Batch2-Calu1-pY_run1	17160	9824	13952	20191112_Haura_KRAS-G12C_TMT-Batch2-Calu1-pY_run1	17160	9824	13952	20191112_Haura_KRAS-G12C_TMT-Batch2-Calu1-pY_run1	17160	Phosphorylation (STY)	1	YApYFNGCSSPTAPLSPMSPPGYK	3,n	267,n	0.5	0.5	YAYFNGCSSPTAPLSPMSPPGYK	YApYFNGCSSPTAPLSPMSPPGYK;P17302;GALSPAKDCGSQKYAYFNGCSSPTAPLSPMS;3;1;3,n	ph_P17302:267
sp|Q9H6B4|CLMP_HUMAN	sp|Q9H6B4|CLMP_HUMAN	Q9H6B4	__Other	Q9H6B4	Q9H6B4	sp|Q9H6B4|CLMP_HUMAN CXADR-like membrane protein OS=Homo sapiens OX=9606 GN=CLMP PE=1 SV=1	0.811846	6.35629	1.50364e-24	124.88	111.95	+	1	LSTDAAPQPGLATQAYSLVGPEVRGSEPKKV	X;X;X;X;X;X;X;X;X;X;X;X;X;X;X;Phospho (STY);X;X;X;X;X;X;X;X;X;X;X;X;X;X;X	PPPPPPPPPPPPPPPPPPPPPPPPXXXXXXX	TLSTDAAPQPGLATQAY(0.812)S(0.188)LVGPEVR	T(-99.43)LS(-99.58)T(-99.68)DAAPQPGLAT(-34.48)QAY(6.36)S(-6.36)LVGPEVR	17	3	-1.2798	---	---	2531	1000	333	333	8480	11957	20191112_Haura_KRAS-G12C_TMT-Batch2-Calu1-pY_run2	16935	8478	11955	20191112_Haura_KRAS-G12C_TMT-Batch2-Calu1-pY_run1	16839	8478	11955	20191112_Haura_KRAS-G12C_TMT-Batch2-Calu1-pY_run1	16839	Phosphorylation (STY)	1	TLSTDAAPQPGLATQApYSLVGPEVR	17>>n	333>>n	0.812	0.812	TLSTDAAPQPGLATQAYSLVGPEVR	TLSTDAAPQPGLATQApYSLVGPEVR;Q9H6B4;LSTDAAPQPGLATQAYSLVGPEVRGSEPKKV;17;1;17>>n	ph_Q9H6B4:333
sp|P08559|ODPA_HUMAN	sp|P08559|ODPA_HUMAN	P08559	__Other	P08559	P08559	sp|P08559|ODPA_HUMAN Pyruvate dehydrogenase E1 component subunit alpha, somatic form, mitochondrial OS=Homo sapiens OX=9606 GN=PDHA1 PE=1 SV=3	0.994721	23.5248	0.00011841	152.47	100.74	+	1	YGMGTSVERAAASTDYYKRGDFIPGLRVDGM	X;X;X;X;X;X;X;X;X;X;X;X;X;X;X;Phospho (STY);X;X;X;X;X;X;X;X;X;X;X;X;X;X;X	XXXXXXXXXPPPPPPPPPPXXXXXXXXXXXX	AAAST(0.001)DY(0.995)Y(0.004)K	AAAS(-51.64)T(-30.66)DY(23.52)Y(-23.52)K	7	2	1.0749	---	---	1329	282	242	242	1	1	20191107_Haura_KRAS-G12C_TMT-Batch1-H358-pY_run1	10365	2	2	20191107_Haura_KRAS-G12C_TMT-Batch1-H358-pY_run2	10352	2	2	20191107_Haura_KRAS-G12C_TMT-Batch1-H358-pY_run2	10352	Phosphorylation (STY)	1	AAASTDpYYK	7>>n	242>>n	0.995	0.995	AAASTDYYK	AAASTDpYYK;P08559;YGMGTSVERAAASTDYYKRGDFIPGLRVDGM;7;1;7>>n	ph_P08559:242
sp|Q8TEW8|PAR3L_HUMAN	sp|Q8TEW8|PAR3L_HUMAN	Q8TEW8	__Other	Q8TEW8	Q8TEW8	sp|Q8TEW8|PAR3L_HUMAN Partitioning defective 3 homolog B OS=Homo sapiens OX=9606 GN=PARD3B PE=1 SV=2	0.999581	33.7744	4.78563e-07	96.492	35.53	+	1	DGNAHNLRFEGMERQYASLPRGGPADPVDYL	X;X;X;X;X;X;X;X;X;X;X;X;X;X;X;Phospho (STY);X;X;X;X;X;X;X;X;X;X;X;X;X;X;X	XXXXXXXXXXXXXXPPPPPPPXXXXXXXXXX	QY(1)ASLPR	QY(33.77)AS(-33.77)LPR	2	2	0.11161	---	---	2270	851	1082	1082	6638	9390	20191112_Haura_KRAS-G12C_TMT-Batch2-Calu1-pY_run2	9612	6638	9390	20191112_Haura_KRAS-G12C_TMT-Batch2-Calu1-pY_run2	9612	6637	9389	20191112_Haura_KRAS-G12C_TMT-Batch2-Calu1-pY_run1	9481	Phosphorylation (STY)	1	QpYASLPR	2>>n	1082>>n	1	1	QYASLPR	QpYASLPR;Q8TEW8;DGNAHNLRFEGMERQYASLPRGGPADPVDYL;2;1;2>>n	ph_Q8TEW8:1082
sp|Q86SQ0|PHLB2_HUMAN	sp|Q86SQ0|PHLB2_HUMAN	Q86SQ0	__Other	Q86SQ0	Q86SQ0	sp|Q86SQ0|PHLB2_HUMAN Pleckstrin homology-like domain family B member 2 OS=Homo sapiens OX=9606 GN=PHLDB2 PE=1 SV=2	0.999772	41.9023	3.50857e-19	122.73	109.28	+	1	LGEKDLPHSVIDNDNYLNFSSLSSGALPYKT	X;X;X;X;X;X;X;X;X;X;X;X;X;X;X;Phospho (STY);X;X;X;X;X;X;X;X;X;X;X;X;X;X;X	XXXXPPPPPPPPPPPPPPPPPPPPPPPPPPX	DLPHSVIDNDNY(1)LNFSSLSSGALPYK	DLPHS(-41.9)VIDNDNY(41.9)LNFS(-41.9)S(-41.9)LS(-45.08)S(-54.74)GALPY(-82.06)K	12	4	-0.84236	---	---	2131	766	301	301	1340	1792	20191112_Haura_KRAS-G12C_TMT-Batch2-Calu1-pY_run2	18511	1340	1792	20191112_Haura_KRAS-G12C_TMT-Batch2-Calu1-pY_run2	18511	1340	1792	20191112_Haura_KRAS-G12C_TMT-Batch2-Calu1-pY_run2	18511	Phosphorylation (STY)	1	DLPHSVIDNDNpYLNFSSLSSGALPYK	12>>n	301>>n	1	1	DLPHSVIDNDNYLNFSSLSSGALPYK	DLPHSVIDNDNpYLNFSSLSSGALPYK;Q86SQ0;LGEKDLPHSVIDNDNYLNFSSLSSGALPYKT;12;1;12>>n	ph_Q86SQ0:301
sp|P35568|IRS1_HUMAN	sp|P35568|IRS1_HUMAN	P35568	__Other	P35568	P35568	sp|P35568|IRS1_HUMAN Insulin receptor substrate 1 OS=Homo sapiens OX=9606 GN=IRS1 PE=1 SV=1	0.989607	19.7871	0.000146379	86.467	64.836	+	1	LGHTPPARGEEELSNYICMGGKGPSTLTAPN	X;X;X;X;X;X;X;X;X;X;X;X;X;X;X;Phospho (STY);X;X;X;X;X;X;X;X;X;X;X;X;X;X;X	XXXXXXXXPPPPPPPPPPPPPPXXXXXXXXX	GEEELS(0.01)NY(0.99)ICMGGK	GEEELS(-19.79)NY(19.79)ICMGGK	8	3	1.62	---	---	1559	419	465	465	2730	3665	20191107_Haura_KRAS-G12C_TMT-Batch1-H358-pY_run2	15408	2731	3666	20191112_Haura_KRAS-G12C_TMT-Batch2-Calu1-pY_run2	15545	2731	3666	20191112_Haura_KRAS-G12C_TMT-Batch2-Calu1-pY_run2	15545	Phosphorylation (STY)	1	GEEELSNpYICMGGK	8>>n	465>>n	0.99	0.99	GEEELSNYICMGGK	GEEELSNpYICMGGK;P35568;LGHTPPARGEEELSNYICMGGKGPSTLTAPN;8;1;8>>n	ph_P35568:465
sp|Q9BRK3|MXRA8_HUMAN	sp|Q9BRK3|MXRA8_HUMAN	Q9BRK3	__Other	Q9BRK3	Q9BRK3	sp|Q9BRK3|MXRA8_HUMAN Matrix remodeling-associated protein 8 OS=Homo sapiens OX=9606 GN=MXRA8 PE=1 SV=1	1	44.8635	0.000266826	142.83	107.6	+	1	LKERAELAHSPLPAKYIDLDKGFRKENCK__	X;X;X;X;X;X;X;X;X;X;X;X;X;X;X;Phospho (STY);X;X;X;X;X;X;X;X;X;X;X;X;X;X;X	XXXXXXXXXXXXXXXPPPPPPPPPPXXXXXX	Y(1)IDLDKGFRK	Y(44.86)IDLDKGFRK	1	3	2.4186	---	---	2469	952	429	429	10039	14207	20191112_Haura_KRAS-G12C_TMT-Batch2-Calu1-pY_run2	13149	10035	14203	20191112_Haura_KRAS-G12C_TMT-Batch2-Calu1-pY_run2	14228	10035	14203	20191112_Haura_KRAS-G12C_TMT-Batch2-Calu1-pY_run2	14228	Phosphorylation (STY)	1	pYIDLDKGFRK	1,x	429,x	1	1	YIDLDKGFRK	pYIDLDKGFRK;Q9BRK3;LKERAELAHSPLPAKYIDLDKGFRKENCK__;1;1;1,x	ph_Q9BRK3:429
sp|Q6NZI2|CAVN1_HUMAN	sp|Q6NZI2|CAVN1_HUMAN	Q6NZI2	__Other	Q6NZI2	Q6NZI2	sp|Q6NZI2|CAVN1_HUMAN Caveolae-associated protein 1 OS=Homo sapiens OX=9606 GN=CAVIN1 PE=1 SV=1	0.989725	19.839	0.000106775	106.13	73.632	+	1	FTPDHVVYARSKTAVYKVPPFTFHVKKIREG	X;Phospho (STY);X;X;X;X;X;Phospho (STY);X;X;X;X;X;X;X;Phospho (STY);X;X;X;X;X;X;X;X;X;X;X;X;X;X;X	XXXXXXXXXXXXPPPPPPPPPPPPPPXXXXX	T(0.01)AVY(0.99)KVPPFTFHVK	T(-19.84)AVY(19.84)KVPPFT(-53.86)FHVK	4	4	3.2502	---	---	2083	731	316	316	8256	11650	20191112_Haura_KRAS-G12C_TMT-Batch2-Calu1-pY_run2	14870	8256	11650	20191112_Haura_KRAS-G12C_TMT-Batch2-Calu1-pY_run2	14870	8256	11650	20191112_Haura_KRAS-G12C_TMT-Batch2-Calu1-pY_run2	14870	Phosphorylation (STY)	1	TAVpYKVPPFTFHVK	4>>n	316>>n	0.99	0.99	TAVYKVPPFTFHVK	TAVpYKVPPFTFHVK;Q6NZI2;FTPDHVVYARSKTAVYKVPPFTFHVKKIREG;4;1;4>>n	ph_Q6NZI2:316
CON__P08727	CON__P08727	CON__P08727;CON__A2A4G1;CON__P08727;CON__P19001;CON__Q9QWL7	__Other	CON__P08727	CON__P08727	sp|P08727|K1C19_HUMAN Keratin, type I cytoskeletal 19 OS=Homo sapiens OX=9606 GN=KRT19 PE=1 SV=4	1	73.215	0.00870949	73.215	50.574	+	1	LEAANGELEVKIRDWYQKQGPGPSRDYSHYY	X;X;X;X;X;X;X;X;X;X;X;X;X;X;X;Phospho (STY);X;X;X;X;X;X;X;X;X;X;X;X;X;X;X	XXXXXXXXXXXPPPPPPPXXXXXXXXXXXXX	IRDWY(1)QK	IRDWY(73.21)QK	5	3	1.1899	---	+	966	4	116	116	4087	5920	20191107_Haura_KRAS-G12C_TMT-Batch1-H358-pY_run2	11696	4087	5920	20191107_Haura_KRAS-G12C_TMT-Batch1-H358-pY_run2	11696	4087	5920	20191107_Haura_KRAS-G12C_TMT-Batch1-H358-pY_run2	11696	Phosphorylation (STY)	1	IRDWpYQK	5,x	116,x	1	1	IRDWYQK	IRDWpYQK;CON__P08727;CON__A2A4G1;CON__P08727;CON__P19001;CON__Q9QWL7;LEAANGELEVKIRDWYQKQGPGPSRDYSHYY;5;1;5,x	ph_P08727:116
sp|Q9HBL0|TENS1_HUMAN	sp|Q9HBL0|TENS1_HUMAN	Q9HBL0	__Other	Q9HBL0	Q9HBL0	sp|Q9HBL0|TENS1_HUMAN Tensin-1 OS=Homo sapiens OX=9606 GN=TNS1 PE=1 SV=2	0.999243	31.2029	0.00349921	61.641	34.543	---	2	RMSVGDRAGSLPNYATINGKVSSPVASGMSS	X;X;X;X;X;X;X;X;X;X;X;X;X;Phospho (STY);X;Phospho (STY);X;X;X;X;X;X;X;X;X;X;X;X;X;X;X	XXXXXXXPPPPPPPPPPPPPXXXXXXXXXXX	AGS(0.001)LPNY(0.999)AT(0.999)INGK	AGS(-31.2)LPNY(31.58)AT(31.2)INGK	9	3	-0.56	---	---	920	1007	1406	1406	299	457	20191112_Haura_KRAS-G12C_TMT-Batch2-Calu1-pY_run2	14365	299	457	20191112_Haura_KRAS-G12C_TMT-Batch2-Calu1-pY_run2	14365	299	457	20191112_Haura_KRAS-G12C_TMT-Batch2-Calu1-pY_run2	14365	Phosphorylation (STY)	2	AGSLPNpYApTINGK	7,9>>n	1404,1406>>n	0.999	0.998	AGSLPNYATINGK	AGSLPNpYApTINGK;Q9HBL0;RMSVGDRAGSLPNYATINGKVSSPVASGMSS;9;2;7,9>>n	ph_Q9HBL0:1406
sp|Q13523|PRP4B_HUMAN	sp|Q13523|PRP4B_HUMAN	Q13523	__Other	Q13523	Q13523	sp|Q13523|PRP4B_HUMAN Serine/threonine-protein kinase PRP4 homolog OS=Homo sapiens OX=9606 GN=PRPF4B PE=1 SV=3	0.588789	1.56178	4.2606e-19	154.65	132.22	---	1	LCDFGSASHVADNDITPYLVSRFYRAPEIII	X;X;X;X;X;X;X;X;X;X;X;X;X;X;X;Phospho (STY);X;X;X;X;X;X;X;X;X;X;X;X;X;X;X	PPPPPPPPPPPPPPPPPPPPPPXXXXXXXXX	LCDFGSASHVADNDIT(0.589)PY(0.411)LVSR	LCDFGS(-92.36)AS(-76.88)HVADNDIT(1.56)PY(-1.56)LVS(-33.41)R	16	2	-0.85907	---	---	789	616	847	847	4825	6902	20191112_Haura_KRAS-G12C_TMT-Batch2-Calu1-pY_run2	16102	4825	6902	20191112_Haura_KRAS-G12C_TMT-Batch2-Calu1-pY_run2	16102	4825	6902	20191112_Haura_KRAS-G12C_TMT-Batch2-Calu1-pY_run2	16102	Phosphorylation (STY)	1	LCDFGSASHVADNDIpTPYLVSR	16>n	847>n	0.589	0.589	LCDFGSASHVADNDITPYLVSR	LCDFGSASHVADNDIpTPYLVSR;Q13523;LCDFGSASHVADNDITPYLVSRFYRAPEIII;16;1;16>n	ph_Q13523:847
sp|Q86YV5|PRAG1_HUMAN	sp|Q86YV5|PRAG1_HUMAN	Q86YV5	__Other	Q86YV5	Q86YV5	sp|Q86YV5|PRAG1_HUMAN Inactive tyrosine-protein kinase PRAG1 OS=Homo sapiens OX=9606 GN=PRAG1 PE=1 SV=4	0.998571	28.5438	4.50344e-25	134.34	126.38	+	1;2	SDQRCSPSGDSEGGEYCSILDCCPGSPVAKA	X;X;X;X;X;X;X;X;X;X;X;X;X;X;X;Phospho (STY);X;X;X;X;X;X;X;X;X;Phospho (STY);X;X;X;X;X	XXXXPPPPPPPPPPPPPPPPPPPPPPPPPPX	CSPSGDSEGGEY(0.999)CS(0.001)ILDCCPGSPVAK	CS(-69.38)PS(-61.3)GDS(-44.97)EGGEY(28.54)CS(-28.54)ILDCCPGS(-83.1)PVAK	12	3	-0.62805	---	---	2155	781	253	253	1079	1496	20191112_Haura_KRAS-G12C_TMT-Batch2-Calu1-pY_run2	14925	1079	1496	20191112_Haura_KRAS-G12C_TMT-Batch2-Calu1-pY_run2	14925	1079	1496	20191112_Haura_KRAS-G12C_TMT-Batch2-Calu1-pY_run2	14925	Phosphorylation (STY)	1	CSPSGDSEGGEpYCSILDCCPGSPVAK	12>>n	253>>n	0.999	0.999	CSPSGDSEGGEYCSILDCCPGSPVAK	CSPSGDSEGGEpYCSILDCCPGSPVAK;Q86YV5;SDQRCSPSGDSEGGEYCSILDCCPGSPVAKA;12;1;12>>n	ph_Q86YV5:253
sp|Q99816|TS101_HUMAN	sp|Q99816|TS101_HUMAN	Q99816	__Other	Q99816	Q99816	sp|Q99816|TS101_HUMAN Tumor susceptibility gene 101 protein OS=Homo sapiens OX=9606 GN=TSG101 PE=1 SV=2	0.999996	55.1367	0.012422	64.091	40.534	+	1	ALMQKARKTAGLSDLY_______________	X;X;X;X;X;X;X;X;X;X;X;X;X;X;X;Phospho (STY);X;X;X;X;X;X;X;X;X;X;X;X;X;X;X	XXXXXXXPPPPPPPPPXXXXXXXXXXXXXXX	KTAGLSDLY(1)	KT(-60.33)AGLS(-55.14)DLY(55.14)	9	2	1.6166	---	---	2454	947	390	390	4616	6624	20191107_Haura_KRAS-G12C_TMT-Batch1-H358-pY_run1	13489	4616	6624	20191107_Haura_KRAS-G12C_TMT-Batch1-H358-pY_run1	13489	4616	6624	20191107_Haura_KRAS-G12C_TMT-Batch1-H358-pY_run1	13489	Phosphorylation (STY)	1	KTAGLSDLpY	9>>n	390>>n	1	1	KTAGLSDLY	KTAGLSDLpY;Q99816;ALMQKARKTAGLSDLY_______________;9;1;9>>n	ph_Q99816:390
sp|P17302|CXA1_HUMAN	sp|P17302|CXA1_HUMAN	P17302	__Other	P17302	P17302	sp|P17302|CXA1_HUMAN Gap junction alpha-1 protein OS=Homo sapiens OX=9606 GN=GJA1 PE=1 SV=2	0.909793	10.0397	3.75376e-15	113.99	102.96	---	1	TSGALSPAKDCGSQKYAYFNGCSSPTAPLSP	X;X;X;X;X;X;X;X;X;X;X;X;X;X;X;Phospho (STY);X;X;X;X;X;X;X;X;X;X;X;X;X;X;X	XXXXXXXXXXXXXXXPPPPPPPPPPPPPPPP	Y(0.91)AY(0.09)FNGCSSPTAPLSPMSPPGYK	Y(10.04)AY(-10.04)FNGCS(-45.11)S(-45.11)PT(-68.2)APLS(-93.56)PMS(-101.06)PPGY(-113.02)K	1	3	-0.17774	---	---	1419	341	265	265	9826	13955	20191112_Haura_KRAS-G12C_TMT-Batch2-Calu1-pY_run2	17275	9826	13955	20191112_Haura_KRAS-G12C_TMT-Batch2-Calu1-pY_run2	17275	9826	13955	20191112_Haura_KRAS-G12C_TMT-Batch2-Calu1-pY_run2	17275	Phosphorylation (STY)	1	pYAYFNGCSSPTAPLSPMSPPGYK	1>>n	265>>n	0.91	0.91	YAYFNGCSSPTAPLSPMSPPGYK	pYAYFNGCSSPTAPLSPMSPPGYK;P17302;TSGALSPAKDCGSQKYAYFNGCSSPTAPLSP;1;1;1>>n	ph_P17302:265
sp|Q5T5P2|SKT_HUMAN	sp|Q5T5P2|SKT_HUMAN	Q5T5P2	__Other	Q5T5P2	Q5T5P2	sp|Q5T5P2|SKT_HUMAN Sickle tail protein homolog OS=Homo sapiens OX=9606 GN=KIAA1217 PE=1 SV=2	0.867516	8.16113	5.97998e-06	164.64	96.418	---	1	SPSVAIYIKDESRNVYYELNDVRNIQDRSLL	X;X;X;X;X;X;X;X;X;X;X;X;X;X;X;Phospho (STY);X;X;X;X;X;X;X;X;X;X;X;X;X;X;X	XXXXXXXXXXXXXPPPPPPPPPPXXXXXXXX	NVY(0.868)Y(0.132)ELNDVR	NVY(8.16)Y(-8.16)ELNDVR	3	2	-0.354	---	---	2040	702	244	244	6096	8673	20191107_Haura_KRAS-G12C_TMT-Batch1-H358-pY_run2	13577	6096	8673	20191107_Haura_KRAS-G12C_TMT-Batch1-H358-pY_run2	13577	6096	8673	20191107_Haura_KRAS-G12C_TMT-Batch1-H358-pY_run2	13577	Phosphorylation (STY)	1	NVpYYELNDVR	3>>n	244>>n	0.868	0.868	NVYYELNDVR	NVpYYELNDVR;Q5T5P2;SPSVAIYIKDESRNVYYELNDVRNIQDRSLL;3;1;3>>n	ph_Q5T5P2:244
sp|O60716|CTND1_HUMAN	sp|O60716|CTND1_HUMAN	O60716	__Other	O60716	O60716	sp|O60716|CTND1_HUMAN Catenin delta-1 OS=Homo sapiens OX=9606 GN=CTNND1 PE=1 SV=1	0.874727	8.44039	0.000102315	93.909	79.655	---	1;2	YEDGYPGGSDNYGSLSRVTRIEERYRPSMEG	X;X;X;X;X;X;X;X;X;X;X;Phospho (STY);X;X;X;Phospho (STY);X;X;X;X;X;X;X;X;Phospho (STY);X;X;X;Oxidation (M);X;X	PPPPPPPPPPPPPPPPPXXXXXXXXXXXXXX	HYEDGYPGGS(0.004)DNY(0.991)GS(0.131)LS(0.875)R	HY(-82.59)EDGY(-39.93)PGGS(-25.33)DNY(21.59)GS(-8.44)LS(8.44)R	17	2	-0.7069	---	---	73	189	232	232	3778	5287	20191112_Haura_KRAS-G12C_TMT-Batch2-Calu1-pY_run1	10688	3778	5287	20191112_Haura_KRAS-G12C_TMT-Batch2-Calu1-pY_run1	10688	3778	5287	20191112_Haura_KRAS-G12C_TMT-Batch2-Calu1-pY_run1	10688	Phosphorylation (STY)	2	HYEDGYPGGSDNpYGSLpSR	13>17>>n	228>232>>n	0.875	0.867	HYEDGYPGGSDNYGSLSR	HYEDGYPGGSDNpYGSLpSR;O60716;YEDGYPGGSDNYGSLSRVTRIEERYRPSMEG;17;2;13>17>>n	ph_O60716:232
sp|Q8N9U0|TAC2N_HUMAN	sp|Q8N9U0|TAC2N_HUMAN	Q8N9U0	__Other	Q8N9U0	Q8N9U0	sp|Q8N9U0|TAC2N_HUMAN Tandem C2 domains nuclear protein OS=Homo sapiens OX=9606 GN=TC2N PE=1 SV=2	0.983208	17.6753	0.000355473	136.8	81.121	+	1	DLSRRFPPRSEVKRLYGSVCDLRTNKLPGSP	X;X;X;X;X;X;X;X;X;X;X;X;X;X;X;Phospho (STY);X;X;X;X;X;X;X;X;X;X;X;X;X;X;X	XXXXXXXXXXXXXXPPPPPPPPPXXXXXXXX	LY(0.983)GS(0.017)VCDLR	LY(17.68)GS(-17.68)VCDLR	2	2	-0.71281	---	---	2217	821	154	154	5428	7834	20191107_Haura_KRAS-G12C_TMT-Batch1-H358-pY_run2	13475	5427	7833	20191107_Haura_KRAS-G12C_TMT-Batch1-H358-pY_run1	13506	5427	7833	20191107_Haura_KRAS-G12C_TMT-Batch1-H358-pY_run1	13506	Phosphorylation (STY)	1	LpYGSVCDLR	2>>n	154>>n	0.983	0.983	LYGSVCDLR	LpYGSVCDLR;Q8N9U0;DLSRRFPPRSEVKRLYGSVCDLRTNKLPGSP;2;1;2>>n	ph_Q8N9U0:154
sp|O75445|USH2A_HUMAN	sp|O75445|USH2A_HUMAN	O75445	__Other	O75445	O75445	sp|O75445|USH2A_HUMAN Usherin OS=Homo sapiens OX=9606 GN=USH2A PE=1 SV=3	0.992078	20.9768	0.0412967	45.312	10.212	+	1	PDSALPCTPSQIETKYTGLGQKASLGGLQPY	X;X;X;X;X;X;X;X;X;X;X;X;X;X;X;Phospho (STY);X;X;X;X;X;X;X;X;X;X;X;X;X;X;X	XXXXXXXXXXXXXXXPPPPPPPXXXXXXXXX	Y(0.992)T(0.008)GLGQK	Y(20.98)T(-20.98)GLGQK	1	2	-2.8201	---	---	1180	201	4887	4887	10410	14690	20191112_Haura_KRAS-G12C_TMT-Batch2-Calu1-pY_run2	14053	10410	14690	20191112_Haura_KRAS-G12C_TMT-Batch2-Calu1-pY_run2	14053	10410	14690	20191112_Haura_KRAS-G12C_TMT-Batch2-Calu1-pY_run2	14053	Phosphorylation (STY)	1	pYTGLGQK	1>>n	4887>>n	0.992	0.992	YTGLGQK	pYTGLGQK;O75445;PDSALPCTPSQIETKYTGLGQKASLGGLQPY;1;1;1>>n	ph_O75445:4887
sp|Q96NY8|NECT4_HUMAN	sp|Q96NY8|NECT4_HUMAN	Q96NY8	__Other	Q96NY8	Q96NY8	sp|Q96NY8|NECT4_HUMAN Nectin-4 OS=Homo sapiens OX=9606 GN=NECTIN4 PE=1 SV=1	0.999771	36.4098	0.00183978	69.602	49.718	+	1	QENGTLRAKPTGNGIYINGRGHLV_______	X;X;X;X;X;X;X;X;X;X;X;X;X;X;X;Phospho (STY);X;X;X;X;X;X;X;X;X;X;X;X;X;X;X	XXXXXXXPPPPPPPPPPPPPXXXXXXXXXXX	AKPTGNGIY(1)INGR	AKPT(-36.41)GNGIY(36.41)INGR	9	3	2.0841	---	---	2376	923	502	502	417	617	20191107_Haura_KRAS-G12C_TMT-Batch1-H358-pY_run2	10519	417	617	20191107_Haura_KRAS-G12C_TMT-Batch1-H358-pY_run2	10519	417	617	20191107_Haura_KRAS-G12C_TMT-Batch1-H358-pY_run2	10519	Phosphorylation (STY)	1	AKPTGNGIpYINGR	9>>n	502>>n	1	1	AKPTGNGIYINGR	AKPTGNGIpYINGR;Q96NY8;QENGTLRAKPTGNGIYINGRGHLV_______;9;1;9>>n	ph_Q96NY8:502
sp|Q68CZ2|TENS3_HUMAN	sp|Q68CZ2|TENS3_HUMAN	Q68CZ2	__Other	Q68CZ2	Q68CZ2	sp|Q68CZ2|TENS3_HUMAN Tensin-3 OS=Homo sapiens OX=9606 GN=TNS3 PE=1 SV=2	1	143.777	4.19952e-22	192.18	169.3	+	1;2	EQPLGGRLRKLSLGQYDNDAGGQLPFSKCAW	X;X;X;X;X;X;X;X;X;X;X;Phospho (STY);X;X;X;Phospho (STY);X;X;X;X;X;X;X;X;X;X;X;X;X;X;X	XXXXXXXXXPPPPPPPPPPPPPPPPPPPXXX	KLS(1)LGQY(1)DNDAGGQLPFSK	KLS(150.63)LGQY(143.78)DNDAGGQLPFS(-143.78)K	7	3	0.67884	---	---	2066	722	780	780	4476	6463	20191112_Haura_KRAS-G12C_TMT-Batch2-Calu1-pY_run2	17064	4467	6454	20191112_Haura_KRAS-G12C_TMT-Batch2-Calu1-pY_run1	15475	4467	6454	20191112_Haura_KRAS-G12C_TMT-Batch2-Calu1-pY_run1	15475	Phosphorylation (STY)	2	KLpSLGQpYDNDAGGQLPFSK	3,7>>n	776,780>>n	1	1	KLSLGQYDNDAGGQLPFSK	KLpSLGQpYDNDAGGQLPFSK;Q68CZ2;EQPLGGRLRKLSLGQYDNDAGGQLPFSKCAW;7;2;3,7>>n	ph_Q68CZ2:780
sp|O14964|HGS_HUMAN	sp|O14964|HGS_HUMAN	O14964	__Other	O14964	O14964	sp|O14964|HGS_HUMAN Hepatocyte growth factor-regulated tyrosine kinase substrate OS=Homo sapiens OX=9606 GN=HGS PE=1 SV=1	0.99994	42.2186	0.00102359	88.681	56.838	+	1	AEDIDPELARYLNRNYWEKKQEEARKSPTPS	X;X;X;X;X;X;X;X;X;X;X;X;X;X;X;Phospho (STY);X;X;X;X;X;X;X;X;X;X;X;X;X;X;X	XXXXXXXXXXPPPPPPPPPXXXXXXXXXXXX	YLNRNY(1)WEK	Y(-42.22)LNRNY(42.22)WEK	6	3	1.9003	---	---	1080	143	334	334	10109	14282	20191112_Haura_KRAS-G12C_TMT-Batch2-Calu1-pY_run2	12741	10109	14282	20191112_Haura_KRAS-G12C_TMT-Batch2-Calu1-pY_run2	12741	10109	14282	20191112_Haura_KRAS-G12C_TMT-Batch2-Calu1-pY_run2	12741	Phosphorylation (STY)	1	YLNRNpYWEK	6>>n	334>>n	1	1	YLNRNYWEK	YLNRNpYWEK;O14964;AEDIDPELARYLNRNYWEKKQEEARKSPTPS;6;1;6>>n	ph_O14964:334
sp|Q9NQS7|INCE_HUMAN	sp|Q9NQS7|INCE_HUMAN	Q9NQS7	__Other	Q9NQS7	Q9NQS7	sp|Q9NQS7|INCE_HUMAN Inner centromere protein OS=Homo sapiens OX=9606 GN=INCENP PE=1 SV=3	0.991499	20.6684	4.13671e-05	135.58	112.14	+	1	KTPSQKNRRKKRRISYVQDENRDPIRRRLSR	X;X;X;X;X;X;X;X;X;X;X;X;X;X;X;Phospho (STY);X;X;X;X;X;X;X;X;X;X;X;X;X;X;X	XXXXXXXXXXXXXPPPPPPPPPPPPPPXXXX	IS(0.009)Y(0.991)VQDENRDPIRR	IS(-20.67)Y(20.67)VQDENRDPIRR	3	4	-0.59536	---	---	2585	1021	73	73	4118	5951	20191112_Haura_KRAS-G12C_TMT-Batch2-Calu1-pY_run1	9560	4120	5953	20191112_Haura_KRAS-G12C_TMT-Batch2-Calu1-pY_run2	9717	4120	5953	20191112_Haura_KRAS-G12C_TMT-Batch2-Calu1-pY_run2	9717	Phosphorylation (STY)	1	ISpYVQDENRDPIRR	3>>n	73>>n	0.991	0.991	ISYVQDENRDPIRR	ISpYVQDENRDPIRR;Q9NQS7;KTPSQKNRRKKRRISYVQDENRDPIRRRLSR;3;1;3>>n	ph_Q9NQS7:73
sp|Q8IYA6|CKP2L_HUMAN	sp|Q8IYA6|CKP2L_HUMAN	Q8IYA6	__Other	Q8IYA6	Q8IYA6	sp|Q8IYA6|CKP2L_HUMAN Cytoskeleton-associated protein 2-like OS=Homo sapiens OX=9606 GN=CKAP2L PE=1 SV=4	1	81.865	0.000938891	94.297	59.918	+	1	QVTATPRIAKAEQHNYPGIKLQIGPIPRING	X;X;X;X;X;X;X;X;X;X;X;X;X;X;X;Phospho (STY);X;X;X;X;X;X;X;X;X;X;X;X;X;X;X	XXXXXXXXXXPPPPPPPPPPXXXXXXXXXXX	AEQHNY(1)PGIK	AEQHNY(81.87)PGIK	6	3	-1.078	---	---	2184	797	659	659	189	239	20191113_Haura_KRAS-G12C_TMT-Batch3-H1792-pY_run2	8667	187	237	20191112_Haura_KRAS-G12C_TMT-Batch2-Calu1-pY_run2	8696	185	235	20191107_Haura_KRAS-G12C_TMT-Batch1-H358-pY_run2	8772	Phosphorylation (STY)	1	AEQHNpYPGIK	6,x	659,x	1	1	AEQHNYPGIK	AEQHNpYPGIK;Q8IYA6;QVTATPRIAKAEQHNYPGIKLQIGPIPRING;6;1;6,x	ph_Q8IYA6:659
sp|P35637|FUS_HUMAN	sp|P35637|FUS_HUMAN	P35637	__Other	P35637	P35637	sp|P35637|FUS_HUMAN RNA-binding protein FUS OS=Homo sapiens OX=9606 GN=FUS PE=1 SV=1	0.998885	30.193	0.0131739	66.799	37.226	+	1	GGGGGGGGYNRSSGGYEPRGRGGGRGGRGGM	X;X;X;X;X;X;X;X;X;X;X;X;X;X;X;Phospho (STY);X;X;X;X;X;X;X;X;X;X;X;X;X;X;X	XXXXXXXXXXXPPPPPPPPXXXXXXXXXXXX	SS(0.001)GGY(0.999)EPR	S(-37.97)S(-30.19)GGY(30.19)EPR	5	2	-0.427	---	---	1566	421	239	239	7772	10983	20191113_Haura_KRAS-G12C_TMT-Batch3-H1792-pY_run2	5863	7771	10982	20191113_Haura_KRAS-G12C_TMT-Batch3-H1792-pY_run1	5827	7771	10982	20191113_Haura_KRAS-G12C_TMT-Batch3-H1792-pY_run1	5827	Phosphorylation (STY)	1	SSGGpYEPR	5>>n	239>>n	0.999	0.999	SSGGYEPR	SSGGpYEPR;P35637;GGGGGGGGYNRSSGGYEPRGRGGGRGGRGGM;5;1;5>>n	ph_P35637:239
sp|Q6WRI0|IGS10_HUMAN	sp|Q6WRI0|IGS10_HUMAN	Q6WRI0	__Other	Q6WRI0	Q6WRI0	sp|Q6WRI0|IGS10_HUMAN Immunoglobulin superfamily member 10 OS=Homo sapiens OX=9606 GN=IGSF10 PE=1 SV=1	0.999789	36.7584	0.0256248	54.525	28.416	+	1	PTSIPMEKTHKVNASYPRVSSTNEAKRDSVI	X;X;X;X;X;X;X;X;X;X;X;X;X;X;X;Phospho (STY);X;X;X;X;X;X;X;X;X;X;X;X;X;X;X	XXXXXXXXXXXPPPPPPPXXXXXXXXXXXXX	VNASY(1)PR	VNAS(-36.76)Y(36.76)PR	5	2	-1.3466	---	---	2097	739	1162	1162	9387	13334	20191112_Haura_KRAS-G12C_TMT-Batch2-Calu1-pY_run2	7115	9387	13334	20191112_Haura_KRAS-G12C_TMT-Batch2-Calu1-pY_run2	7115	9387	13334	20191112_Haura_KRAS-G12C_TMT-Batch2-Calu1-pY_run2	7115	Phosphorylation (STY)	1	VNASpYPR	5>>n	1162>>n	1	1	VNASYPR	VNASpYPR;Q6WRI0;PTSIPMEKTHKVNASYPRVSSTNEAKRDSVI;5;1;5>>n	ph_Q6WRI0:1162
sp|P35221|CTNA1_HUMAN	sp|P35221|CTNA1_HUMAN	P35221	__Other	P35221	P35221	sp|P35221|CTNA1_HUMAN Catenin alpha-1 OS=Homo sapiens OX=9606 GN=CTNNA1 PE=1 SV=1	1	42.3359	8.16754e-09	176.05	134.65	---	1	LKLRNAGNEQDLGIQYKALKPEVDKLNIMAA	X;X;X;X;X;X;X;X;X;X;X;X;X;X;X;Phospho (STY);X;X;X;X;X;X;X;X;X;X;X;X;X;X;X	XXXXPPPPPPPPPPPPPXXXXXXXXXXXXXX	NAGNEQDLGIQY(1)K	NAGNEQDLGIQY(42.34)K	12	2	2.7278	---	---	1552	414	177	177	5699	8140	20191113_Haura_KRAS-G12C_TMT-Batch3-H1792-pY_run2	12385	5690	8129	20191107_Haura_KRAS-G12C_TMT-Batch1-H358-pY_run1	12537	5690	8129	20191107_Haura_KRAS-G12C_TMT-Batch1-H358-pY_run1	12537	Phosphorylation (STY)	1	NAGNEQDLGIQpYK	12,x	177,x	1	1	NAGNEQDLGIQYK	NAGNEQDLGIQpYK;P35221;LKLRNAGNEQDLGIQYKALKPEVDKLNIMAA;12;1;12,x	ph_P35221:177
sp|Q9H422|HIPK3_HUMAN	sp|Q9H422|HIPK3_HUMAN	Q9H422	__Other	Q9H422	Q9H422	sp|Q9H422|HIPK3_HUMAN Homeodomain-interacting protein kinase 3 OS=Homo sapiens OX=9606 GN=HIPK3 PE=1 SV=1	0.999576	33.7426	1.41554e-33	239.66	159.77	+	1	DFGSASHVSKTVCSTYLQSRYYRAPEIILGL	X;X;X;X;X;X;X;X;X;X;X;X;X;X;X;Phospho (STY);X;X;X;X;X;X;X;X;X;X;X;X;X;X;X	XXXXXXXXXXPPPPPPPPPPXXXXXXXXXXX	TVCSTY(1)LQSR	T(-137.91)VCS(-58.48)T(-33.74)Y(33.74)LQS(-97.27)R	6	2	-1.9326	---	---	2522	993	359	359	8725	12258	20191107_Haura_KRAS-G12C_TMT-Batch1-H358-pY_run2	10114	8730	12267	20191113_Haura_KRAS-G12C_TMT-Batch3-H1792-pY_run2	10032	8730	12267	20191113_Haura_KRAS-G12C_TMT-Batch3-H1792-pY_run2	10032	Phosphorylation (STY)	1	TVCSTpYLQSR	6>>n	359>>n	1	1	TVCSTYLQSR	TVCSTpYLQSR;Q9H422;DFGSASHVSKTVCSTYLQSRYYRAPEIILGL;6;1;6>>n	ph_Q9H422:359
sp|Q13151|ROA0_HUMAN	sp|Q13151|ROA0_HUMAN	Q13151	__Other	Q13151	Q13151	sp|Q13151|ROA0_HUMAN Heterogeneous nuclear ribonucleoprotein A0 OS=Homo sapiens OX=9606 GN=HNRNPA0 PE=1 SV=1	0.998566	28.4277	3.24129e-13	155.93	131.89	+	1	GHRVEVKKAVPKEDIYSGGGGGGSRSSRGGR	X;X;X;X;X;X;X;X;X;X;X;X;X;X;X;Phospho (STY);X;X;X;X;X;X;X;X;X;X;X;X;X;X;X	XXXXXXXPPPPPPPPPPPPPPPPPPXXXXXX	KAVPKEDIY(0.999)S(0.001)GGGGGGSR	KAVPKEDIY(28.43)S(-28.43)GGGGGGS(-96.49)R	9	4	0.41551	---	---	1882	606	180	180	4252	6180	20191112_Haura_KRAS-G12C_TMT-Batch2-Calu1-pY_run1	9010	4252	6180	20191112_Haura_KRAS-G12C_TMT-Batch2-Calu1-pY_run1	9010	4252	6180	20191112_Haura_KRAS-G12C_TMT-Batch2-Calu1-pY_run1	9010	Phosphorylation (STY)	1	KAVPKEDIpYSGGGGGGSR	9>>n	180>>n	0.999	0.999	KAVPKEDIYSGGGGGGSR	KAVPKEDIpYSGGGGGGSR;Q13151;GHRVEVKKAVPKEDIYSGGGGGGSRSSRGGR;9;1;9>>n	ph_Q13151:180
sp|Q7Z6E9|RBBP6_HUMAN	sp|Q7Z6E9|RBBP6_HUMAN	Q7Z6E9	__Other	Q7Z6E9	Q7Z6E9	sp|Q7Z6E9|RBBP6_HUMAN E3 ubiquitin-protein ligase RBBP6 OS=Homo sapiens OX=9606 GN=RBBP6 PE=1 SV=1	0.975446	16.2843	0.00318899	66.393	45.729	+	1	YVGGQSHRSRNIGSNYPEKLSARDGHNQKDN	X;X;X;X;X;X;X;X;X;X;X;X;X;X;X;Phospho (STY);X;X;X;X;X;X;X;X;X;X;X;X;X;X;X	XXXXXXXXXXPPPPPPPPPPPPPXXXXXXXX	NIGS(0.023)NY(0.975)PEKLS(0.002)AR	NIGS(-16.28)NY(16.28)PEKLS(-27.84)AR	6	3	-0.62941	---	---	2125	762	898	898	5802	8324	20191107_Haura_KRAS-G12C_TMT-Batch1-H358-pY_run1	10883	5804	8326	20191113_Haura_KRAS-G12C_TMT-Batch3-H1792-pY_run1	10664	5804	8326	20191113_Haura_KRAS-G12C_TMT-Batch3-H1792-pY_run1	10664	Phosphorylation (STY)	1	NIGSNpYPEKLSAR	6>>n	898>>n	0.975	0.975	NIGSNYPEKLSAR	NIGSNpYPEKLSAR;Q7Z6E9;YVGGQSHRSRNIGSNYPEKLSARDGHNQKDN;6;1;6>>n	ph_Q7Z6E9:898
sp|Q96JP5|ZFP91_HUMAN	sp|Q96JP5|ZFP91_HUMAN	Q96JP5	__Other	Q96JP5	Q96JP5	sp|Q96JP5|ZFP91_HUMAN E3 ubiquitin-protein ligase ZFP91 OS=Homo sapiens OX=9606 GN=ZFP91 PE=1 SV=1	1	51.3458	0.0173765	52.716	27.793	+	1	AAAAAAAVSRRRKAEYPRRRRSSPSARPPDV	X;X;X;X;X;X;X;X;X;X;X;X;X;X;X;Phospho (STY);X;X;X;X;X;X;X;X;X;X;X;X;X;X;X	XXXXXXXXXXXXPPPPPPPXXXXXXXXXXXX	KAEY(1)PRR	KAEY(51.35)PRR	4	3	-1.5815	---	---	2368	914	76	76	4231	6152	20191113_Haura_KRAS-G12C_TMT-Batch3-H1792-pY_run2	5611	4230	6151	20191107_Haura_KRAS-G12C_TMT-Batch1-H358-pY_run1	5717	4230	6151	20191107_Haura_KRAS-G12C_TMT-Batch1-H358-pY_run1	5717	Phosphorylation (STY)	1	KAEpYPRR	4,x	76,x	1	1	KAEYPRR	KAEpYPRR;Q96JP5;AAAAAAAVSRRRKAEYPRRRRSSPSARPPDV;4;1;4,x	ph_Q96JP5:76
sp|Q9NR20|DYRK4_HUMAN	sp|Q9NR20|DYRK4_HUMAN	Q92630;Q9NR20	__Other	Q9NR20	Q9NR20	sp|Q9NR20|DYRK4_HUMAN Dual specificity tyrosine-phosphorylation-regulated kinase 4 OS=Homo sapiens OX=9606 GN=DYRK4 PE=1 SV=2;sp|Q92630|DYRK2_HUMAN Dual specificity tyrosine-phosphorylation-regulated kinase 2 OS=Homo sapiens OX=9606 GN=DYRK2 PE=1 SV=3	0.999996	54.1083	2.17768e-21	225.24	118.23	+	1	IDFGSSCYEHQKVYTYIQSRFYRSPEVILGH	X;X;X;X;X;X;X;X;X;X;X;X;X;X;X;Phospho (STY);X;X;X;X;X;X;X;X;X;X;X;X;X;X;X	XXXXXXXXXXXXPPPPPPPPXXXXXXXXXXX	VYTY(1)IQSR	VY(-81.25)T(-54.11)Y(54.11)IQS(-89.81)R	4	2	-1.3455	---	---	2308	876	264	264	9679	13761	20191112_Haura_KRAS-G12C_TMT-Batch2-Calu1-pY_run1	12118	9677	13756	20191107_Haura_KRAS-G12C_TMT-Batch1-H358-pY_run1	12272	9677	13756	20191107_Haura_KRAS-G12C_TMT-Batch1-H358-pY_run1	12272	Phosphorylation (STY)	1	VYTpYIQSR	4>>n	264>>n	1	1	VYTYIQSR	VYTpYIQSR;Q92630;Q9NR20;IDFGSSCYEHQKVYTYIQSRFYRSPEVILGH;4;1;4>>n	ph_Q9NR20:264
sp|Q14247|SRC8_HUMAN	sp|Q14247|SRC8_HUMAN	Q14247	__Other	Q14247	Q14247	sp|Q14247|SRC8_HUMAN Src substrate cortactin OS=Homo sapiens OX=9606 GN=CTTN PE=1 SV=2	0.977334	16.3469	2.52445e-49	210.22	188.02	+	1;2	LSYRGPVSGTEPEPVYSMEAADYREASSQQG	X;X;X;X;X;X;X;X;X;X;X;X;X;X;X;Phospho (STY);X;Oxidation (M);X;X;X;X;Phospho (STY);X;X;X;X;X;X;X;X	PPPPPPPPPPPPPPPPPPPPPPPPXXXXXXX	GPVSGTEPEPVY(0.977)S(0.023)MEAADYR	GPVS(-140.7)GT(-129.05)EPEPVY(16.35)S(-16.35)MEAADY(-62.57)R	12	3	-1.0466	---	---	1937	640	446	446	3059	4219	20191113_Haura_KRAS-G12C_TMT-Batch3-H1792-pY_run1	14637	172	217	20191112_Haura_KRAS-G12C_TMT-Batch2-Calu1-pY_run1	14762	172	217	20191112_Haura_KRAS-G12C_TMT-Batch2-Calu1-pY_run1	14762	Phosphorylation (STY)	1	GPVSGTEPEPVpYSMEAADYR	12>>n	446>>n	0.977	0.977	GPVSGTEPEPVYSMEAADYR	GPVSGTEPEPVpYSMEAADYR;Q14247;LSYRGPVSGTEPEPVYSMEAADYREASSQQG;12;1;12>>n	ph_Q14247:446
sp|P53801|PTTG_HUMAN	sp|P53801|PTTG_HUMAN	P53801	__Other	P53801	P53801	sp|P53801|PTTG_HUMAN Pituitary tumor-transforming gene 1 protein-interacting protein OS=Homo sapiens OX=9606 GN=PTTG1IP PE=1 SV=1	1	40.4755	7.90485e-13	189.33	170.5	+	1;2	DEIRKKYGLFKEENPYARFENN_________	X;X;X;X;X;X;Phospho (STY);X;X;X;X;X;X;X;X;Phospho (STY);X;X;X;X;X;X;X;X;X;X;X;X;X;X;X	XXXXXPPPPPPPPPPPPPXXXXXXXXXXXXX	Y(1)GLFKEENPY(1)AR	Y(40.48)GLFKEENPY(40.48)AR	10	3	0.53382	---	---	1651	482	174	174	9960	14118	20191112_Haura_KRAS-G12C_TMT-Batch2-Calu1-pY_run2	14188	9949	14101	20191112_Haura_KRAS-G12C_TMT-Batch2-Calu1-pY_run1	13208	4752	6786	20191112_Haura_KRAS-G12C_TMT-Batch2-Calu1-pY_run2	11882	Phosphorylation (STY)	2	pYGLFKEENPpYAR	1,10,x	165,174,x	1	1	YGLFKEENPYAR	pYGLFKEENPpYAR;P53801;DEIRKKYGLFKEENPYARFENN_________;10;2;1,10,x	ph_P53801:174
sp|Q9Y520|PRC2C_HUMAN	sp|Q9Y520|PRC2C_HUMAN	Q9Y520	__Other	Q9Y520	Q9Y520	sp|Q9Y520|PRC2C_HUMAN Protein PRRC2C OS=Homo sapiens OX=9606 GN=PRRC2C PE=1 SV=4	0.99978	36.8782	0.00108407	118.4	92.36	+	1	SYGGRGRGGRGHTRDYPQYRDNKPRAEHIPS	X;X;X;X;X;X;X;X;X;X;X;X;X;X;X;Phospho (STY);X;X;X;X;X;X;X;X;X;X;X;X;X;X;X	XXXXXXXXXXPPPPPPPPPPXXXXXXXXXXX	GHTRDY(1)PQYR	GHT(-36.88)RDY(36.88)PQY(-48.3)R	6	3	-1.4605	---	---	2755	1130	1218	1218	2895	4002	20191113_Haura_KRAS-G12C_TMT-Batch3-H1792-pY_run1	5327	2895	4002	20191113_Haura_KRAS-G12C_TMT-Batch3-H1792-pY_run1	5327	2893	3999	20191107_Haura_KRAS-G12C_TMT-Batch1-H358-pY_run1	5473	Phosphorylation (STY)	1	GHTRDpYPQYR	6>>n	1218>>n	1	1	GHTRDYPQYR	GHTRDpYPQYR;Q9Y520;SYGGRGRGGRGHTRDYPQYRDNKPRAEHIPS;6;1;6>>n	ph_Q9Y520:1218
sp|O43491|E41L2_HUMAN	sp|O43491|E41L2_HUMAN	O43491	__Other	O43491	O43491	sp|O43491|E41L2_HUMAN Band 4.1-like protein 2 OS=Homo sapiens OX=9606 GN=EPB41L2 PE=1 SV=1	1	51.6064	1.57819e-18	197	169.5	---	2	PTKAPHLQLIEGKKNSLRVEGDNIYVRHSNL	X;X;X;X;X;X;X;X;X;X;X;X;X;X;X;Phospho (STY);X;X;X;X;X;X;X;X;Phospho (STY);X;X;X;X;X;X	XXXXXXXXXXXXXPPPPPPPPPPPPPPXXXX	KNS(1)LRVEGDNIY(1)VR	KNS(51.61)LRVEGDNIY(51.61)VR	3	4	-1.7179	---	---	61	164	614	614	4506	6504	20191113_Haura_KRAS-G12C_TMT-Batch3-H1792-pY_run2	12116	4501	6496	20191112_Haura_KRAS-G12C_TMT-Batch2-Calu1-pY_run2	12191	4501	6496	20191112_Haura_KRAS-G12C_TMT-Batch2-Calu1-pY_run2	12191	Phosphorylation (STY)	2	KNpSLRVEGDNIpYVR	3,12,x	614,623,x	1	1	KNSLRVEGDNIYVR	KNpSLRVEGDNIpYVR;O43491;PTKAPHLQLIEGKKNSLRVEGDNIYVRHSNL;3;2;3,12,x	ph_O43491:614
sp|Q13561|DCTN2_HUMAN	sp|Q13561|DCTN2_HUMAN	Q13561	__Other	Q13561	Q13561	sp|Q13561|DCTN2_HUMAN Dynactin subunit 2 OS=Homo sapiens OX=9606 GN=DCTN2 PE=1 SV=4	1	85.2117	0.00036529	119.41	92.077	+	1	__________MADPKYADLPGIARNEPDVYE	X;X;X;X;X;X;X;X;X;X;X;X;X;X;X;Phospho (STY);X;X;X;X;X;X;X;X;X;X;X;X;X;X;X	XXXXXXXXXXXXXXXPPPPPPPPPXXXXXXX	Y(1)ADLPGIAR	Y(85.21)ADLPGIAR	1	2	0.045179	---	---	1905	618	6	6	9779	13896	20191113_Haura_KRAS-G12C_TMT-Batch3-H1792-pY_run2	13491	9777	13894	20191112_Haura_KRAS-G12C_TMT-Batch2-Calu1-pY_run2	13606	9776	13893	20191112_Haura_KRAS-G12C_TMT-Batch2-Calu1-pY_run1	13513	Phosphorylation (STY)	1	pYADLPGIAR	1,x	6,x	1	1	YADLPGIAR	pYADLPGIAR;Q13561;__________MADPKYADLPGIARNEPDVYE;1;1;1,x	ph_Q13561:6
sp|Q16625|OCLN_HUMAN	sp|Q16625|OCLN_HUMAN	Q16625	__Other	Q16625	Q16625	sp|Q16625|OCLN_HUMAN Occludin OS=Homo sapiens OX=9606 GN=OCLN PE=1 SV=1	0.999637	35.0255	1.00459e-59	230.12	212.76	+	1	AGRSKRTEQDHYETDYTTGGESCDELEEDWI	X;X;X;X;X;X;X;X;X;X;X;X;X;X;X;Phospho (STY);X;X;X;X;X;X;X;X;X;X;X;X;X;X;X	XXXXXPPPPPPPPPPPPPPPPPPPPPPPPPP	TEQDHYETDY(1)TTGGESCDELEEDWIR	T(-91.2)EQDHY(-51.59)ET(-44.77)DY(35.03)T(-35.03)T(-50.65)GGES(-110.8)CDELEEDWIR	10	3	-0.83716	---	---	2010	677	402	402	8303	11722	20191112_Haura_KRAS-G12C_TMT-Batch2-Calu1-pY_run1	14972	8303	11722	20191112_Haura_KRAS-G12C_TMT-Batch2-Calu1-pY_run1	14972	8303	11722	20191112_Haura_KRAS-G12C_TMT-Batch2-Calu1-pY_run1	14972	Phosphorylation (STY)	1	TEQDHYETDpYTTGGESCDELEEDWIR	10>>n	402>>n	1	1	TEQDHYETDYTTGGESCDELEEDWIR	TEQDHYETDpYTTGGESCDELEEDWIR;Q16625;AGRSKRTEQDHYETDYTTGGESCDELEEDWI;10;1;10>>n	ph_Q16625:402
sp|P05387|RLA2_HUMAN	sp|P05387|RLA2_HUMAN	P05387	__Other	P05387	P05387	sp|P05387|RLA2_HUMAN 60S acidic ribosomal protein P2 OS=Homo sapiens OX=9606 GN=RPLP2 PE=1 SV=1	0.981171	17.2409	4.67682e-13	152.32	133.72	---	1	_____________MRYVASYLLAALGGNSSP	X;X;X;X;X;X;X;X;X;X;X;X;X;X;X;Phospho (STY);X;X;X;X;X;X;X;X;X;X;X;X;X;X;X	XXXXXXXXXXXXXXXPPPPPPPPPPPPPPPP	Y(0.981)VAS(0.019)YLLAALGGNSSPSAK	Y(17.24)VAS(-17.24)Y(-35.02)LLAALGGNS(-121.36)S(-137.23)PS(-143.61)AK	1	3	1.3439	---	---	1267	261	3	3	10425	14705	20191112_Haura_KRAS-G12C_TMT-Batch2-Calu1-pY_run1	21166	10425	14705	20191112_Haura_KRAS-G12C_TMT-Batch2-Calu1-pY_run1	21166	10425	14705	20191112_Haura_KRAS-G12C_TMT-Batch2-Calu1-pY_run1	21166	Phosphorylation (STY)	1	pYVASYLLAALGGNSSPSAK	1>>n	3>>n	0.981	0.981	YVASYLLAALGGNSSPSAK	pYVASYLLAALGGNSSPSAK;P05387;_____________MRYVASYLLAALGGNSSP;1;1;1>>n	ph_P05387:3
sp|P17302|CXA1_HUMAN	sp|P17302|CXA1_HUMAN	P17302	__Other	P17302	P17302	sp|P17302|CXA1_HUMAN Gap junction alpha-1 protein OS=Homo sapiens OX=9606 GN=GJA1 PE=1 SV=2	0.99989	39.5877	1.25714e-15	186.56	164.93	+	1	CRNYNKQASEQNWANYSAEQNRMGQAGSTIS	X;X;X;X;X;X;X;X;X;X;X;X;X;X;X;Phospho (STY);X;X;X;X;X;X;X;X;X;X;X;X;X;X;X	XXXXXXPPPPPPPPPPPPPPPPXXXXXXXXX	QASEQNWANY(1)SAEQNR	QAS(-130.6)EQNWANY(39.59)S(-39.59)AEQNR	10	3	-1.1517	---	---	1421	341	313	313	6214	8830	20191113_Haura_KRAS-G12C_TMT-Batch3-H1792-pY_run1	10259	6213	8829	20191112_Haura_KRAS-G12C_TMT-Batch2-Calu1-pY_run2	10406	6213	8829	20191112_Haura_KRAS-G12C_TMT-Batch2-Calu1-pY_run2	10406	Phosphorylation (STY)	1	QASEQNWANpYSAEQNR	10>>n	313>>n	1	1	QASEQNWANYSAEQNR	QASEQNWANpYSAEQNR;P17302;CRNYNKQASEQNWANYSAEQNRMGQAGSTIS;10;1;10>>n	ph_P17302:313
sp|P46783|RS10_HUMAN	sp|P46783|RS10_HUMAN	P46783	__Other	P46783	P46783	sp|P46783|RS10_HUMAN 40S ribosomal protein S10 OS=Homo sapiens OX=9606 GN=RPS10 PE=1 SV=1	0.555714	0.97188	0.0174549	52.79	37.128	---	1	GERPARLTRGEADRDTYRRSAVPPGADKKAE	X;X;X;X;X;X;X;X;X;X;X;X;X;X;X;Phospho (STY);X;X;X;X;X;X;X;X;X;X;X;X;X;X;X	XXXXXXXXXPPPPPPPPPPXXXXXXXXXXXX	GEADRDT(0.556)Y(0.444)RR	GEADRDT(0.97)Y(-0.97)RR	7	3	-1.6137	---	---	727	449	126	126	2727	3662	20191107_Haura_KRAS-G12C_TMT-Batch1-H358-pY_run2	4337	2728	3663	20191112_Haura_KRAS-G12C_TMT-Batch2-Calu1-pY_run1	4192	2728	3663	20191112_Haura_KRAS-G12C_TMT-Batch2-Calu1-pY_run1	4192	Phosphorylation (STY)	1	GEADRDpTYRR	7>n	126>n	0.556	0.556	GEADRDTYRR	GEADRDpTYRR;P46783;GERPARLTRGEADRDTYRRSAVPPGADKKAE;7;1;7>n	ph_P46783:126
sp|P30530|UFO_HUMAN	sp|P30530|UFO_HUMAN	P30530	__Other	P30530	P30530	sp|P30530|UFO_HUMAN Tyrosine-protein kinase receptor UFO OS=Homo sapiens OX=9606 GN=AXL PE=1 SV=4	1	127.199	4.81536e-15	217.02	183.47	+	1;2	VADFGLSKKIYNGDYYRQGRIAKMPVKWIAI	X;X;X;X;X;X;X;X;X;X;X;X;X;X;Phospho (STY);Phospho (STY);X;X;X;X;X;X;X;X;X;X;X;X;X;X;X	XXXXXXXXPPPPPPPPPPPPXXXXXXXXXXX	IYNGDY(1)Y(1)R	IY(-95.77)NGDY(95.77)Y(127.2)R	7	2	0.9954	---	---	1538	406	703	703	4186	6047	20191112_Haura_KRAS-G12C_TMT-Batch2-Calu1-pY_run2	12676	4180	6033	20191112_Haura_KRAS-G12C_TMT-Batch2-Calu1-pY_run2	11602	4180	6033	20191112_Haura_KRAS-G12C_TMT-Batch2-Calu1-pY_run2	11602	Phosphorylation (STY)	2	IYNGDpYpYR	7,6>>n	703,702>>n	1	1	IYNGDYYR	IYNGDpYpYR;P30530;VADFGLSKKIYNGDYYRQGRIAKMPVKWIAI;7;2;7,6>>n	ph_P30530:703
sp|O14974|MYPT1_HUMAN	sp|O14974|MYPT1_HUMAN	O14974	__Other	O14974	O14974	sp|O14974|MYPT1_HUMAN Protein phosphatase 1 regulatory subunit 12A OS=Homo sapiens OX=9606 GN=PPP1R12A PE=1 SV=1	0.999981	47.2598	0.000414768	163.99	117.61	+	1	EDEYKQKYSRTYDETYQRYRPVSTSSSTTPS	X;X;X;X;X;X;X;X;X;X;X;X;X;X;X;Phospho (STY);X;X;X;X;X;X;X;X;X;X;X;X;X;X;X	XXXXXXXXXXPPPPPPPPXXXXXXXXXXXXX	TYDETY(1)QR	T(-114.27)Y(-105.07)DET(-47.26)Y(47.26)QR	6	2	-0.63321	---	---	1083	144	766	766	8797	12367	20191112_Haura_KRAS-G12C_TMT-Batch2-Calu1-pY_run2	7801	8797	12367	20191112_Haura_KRAS-G12C_TMT-Batch2-Calu1-pY_run2	7801	8796	12365	20191112_Haura_KRAS-G12C_TMT-Batch2-Calu1-pY_run1	7707	Phosphorylation (STY)	1	TYDETpYQR	6>>n	766>>n	1	1	TYDETYQR	TYDETpYQR;O14974;EDEYKQKYSRTYDETYQRYRPVSTSSSTTPS;6;1;6>>n	ph_O14974:766
sp|Q9UDY2|ZO2_HUMAN	sp|Q9UDY2|ZO2_HUMAN	Q9UDY2	__Other	Q9UDY2	Q9UDY2	sp|Q9UDY2|ZO2_HUMAN Tight junction protein ZO-2 OS=Homo sapiens OX=9606 GN=TJP2 PE=1 SV=2	1	67.2753	0.000119035	118.26	85.143	+	1;2	DRDRDRSRGRSIDQDYERAYHRAYDPDYERA	X;X;X;X;X;X;X;X;X;X;Phospho (STY);X;X;X;X;Phospho (STY);X;X;X;X;X;X;X;Phospho (STY);X;X;X;Phospho (STY);X;X;X	XXXXXXXXPPPPPPPPPPXXXXXXXXXXXXX	GRS(1)IDQDY(1)ER	GRS(67.28)IDQDY(67.28)ER	8	3	-0.83877	---	---	2643	1065	249	249	3145	4336	20191112_Haura_KRAS-G12C_TMT-Batch2-Calu1-pY_run2	7465	7255	10225	20191112_Haura_KRAS-G12C_TMT-Batch2-Calu1-pY_run1	8298	7256	10226	20191112_Haura_KRAS-G12C_TMT-Batch2-Calu1-pY_run2	8411	Phosphorylation (STY)	2	GRpSIDQDpYER	3,8,x	244,249,x	1	1	GRSIDQDYER	GRpSIDQDpYER;Q9UDY2;DRDRDRSRGRSIDQDYERAYHRAYDPDYERA;8;2;3,8,x	ph_Q9UDY2:249
sp|Q14247|SRC8_HUMAN	sp|Q14247|SRC8_HUMAN	Q14247	__Other	Q14247	Q14247	sp|Q14247|SRC8_HUMAN Src substrate cortactin OS=Homo sapiens OX=9606 GN=CTTN PE=1 SV=2	0.608166	1.90933	1.02591e-18	117.36	102.66	---	1	SYRGPVSGTEPEPVYSMEAADYREASSQQGL	X;X;X;X;X;X;X;X;X;X;X;X;X;X;X;Phospho (STY);Oxidation (M);X;X;X;X;X;X;X;X;X;X;X;X;X;X	PPPPPPPPPPPPPPPPPPPPPPPXXXXXXXX	AELSYRGPVSGTEPEPVY(0.392)S(0.608)MEAADYR	AELS(-88.7)Y(-82.65)RGPVS(-62.3)GT(-55.99)EPEPVY(-1.91)S(1.91)MEAADY(-47.93)R	19	3	-1.6364	---	---	305	640	447	447	168	212	20191112_Haura_KRAS-G12C_TMT-Batch2-Calu1-pY_run1	13062	168	212	20191112_Haura_KRAS-G12C_TMT-Batch2-Calu1-pY_run1	13062	168	212	20191112_Haura_KRAS-G12C_TMT-Batch2-Calu1-pY_run1	13062	Phosphorylation (STY)	1	AELSYRGPVSGTEPEPVYpSMEAADYR	19>n	447>n	0.608	0.608	AELSYRGPVSGTEPEPVYSMEAADYR	AELSYRGPVSGTEPEPVYpSMEAADYR;Q14247;SYRGPVSGTEPEPVYSMEAADYREASSQQGL;19;1;19>n	ph_Q14247:447
sp|P16591|FER_HUMAN	sp|P16591|FER_HUMAN	P16591	__Other	P16591	P16591	sp|P16591|FER_HUMAN Tyrosine-protein kinase Fer OS=Homo sapiens OX=9606 GN=FER PE=1 SV=2	0.999582	34.0474	1.19511e-08	175.48	148.38	+	1	KISDFGMSRQEDGGVYSSSGLKQIPIKWTAP	X;X;X;X;X;X;X;X;X;X;X;X;X;X;X;Phospho (STY);X;X;X;X;X;X;X;X;X;X;X;X;X;X;X	XPPPPPPPPPPPPPPPPPPPPPXXXXXXXXX	QEDGGVY(1)SSSGLK	QEDGGVY(34.05)S(-34.05)S(-46.77)S(-54.31)GLK	7	3	0.537	---	---	1415	337	714	714	6296	8969	20191113_Haura_KRAS-G12C_TMT-Batch3-H1792-pY_run2	10829	6291	8961	20191112_Haura_KRAS-G12C_TMT-Batch2-Calu1-pY_run1	10751	6291	8961	20191112_Haura_KRAS-G12C_TMT-Batch2-Calu1-pY_run1	10751	Phosphorylation (STY)	1	QEDGGVpYSSSGLK	7>>n	714>>n	1	1	QEDGGVYSSSGLK	QEDGGVpYSSSGLK;P16591;KISDFGMSRQEDGGVYSSSGLKQIPIKWTAP;7;1;7>>n	ph_P16591:714
sp|Q9NP81|SYSM_HUMAN	sp|Q9NP81|SYSM_HUMAN	Q9NP81	__Other	Q9NP81	Q9NP81	sp|Q9NP81|SYSM_HUMAN Serine--tRNA ligase, mitochondrial OS=Homo sapiens OX=9606 GN=SARS2 PE=1 SV=1	0.938926	11.8678	0.00113685	72.496	41.946	+	1	EKRNRNLLYEYAREGYSALPQLDIERFCACP	X;X;X;X;X;X;X;X;X;X;X;X;X;X;X;Phospho (STY);X;X;X;X;X;X;X;X;X;X;X;X;X;X;X	XXXXXXXXXXXXXPPPPPPPPPPPPPXXXXX	EGY(0.939)S(0.061)ALPQLDIER	EGY(11.87)S(-11.87)ALPQLDIER	3	3	-1.0475	---	---	2574	1016	52	52	1914	2575	20191107_Haura_KRAS-G12C_TMT-Batch1-H358-pY_run1	15621	1914	2575	20191107_Haura_KRAS-G12C_TMT-Batch1-H358-pY_run1	15621	1914	2575	20191107_Haura_KRAS-G12C_TMT-Batch1-H358-pY_run1	15621	Phosphorylation (STY)	1	EGpYSALPQLDIER	3>>n	52>>n	0.939	0.939	EGYSALPQLDIER	EGpYSALPQLDIER;Q9NP81;EKRNRNLLYEYAREGYSALPQLDIERFCACP;3;1;3>>n	ph_Q9NP81:52
sp|Q07157|ZO1_HUMAN	sp|Q07157|ZO1_HUMAN	Q07157	__Other	Q07157	Q07157	sp|Q07157|ZO1_HUMAN Tight junction protein ZO-1 OS=Homo sapiens OX=9606 GN=TJP1 PE=1 SV=3	0.999999	64.9992	1.07962e-05	84.035	67.529	+	1	DLDSRQHPEESSERGYFPRFEEPAPLSYDSR	X;X;X;X;X;X;X;X;X;X;X;X;X;X;X;Phospho (STY);X;X;X;X;X;X;X;X;X;X;X;Phospho (STY);X;X;X	XXXXXXXXXXXXXXPPPPPPPPPPPPPPPPP	GY(1)FPRFEEPAPLSYDSRPR	GY(65)FPRFEEPAPLS(-65.25)Y(-65)DS(-79.68)RPR	2	4	-0.20263	---	---	1823	574	1128	1128	3356	4607	20191112_Haura_KRAS-G12C_TMT-Batch2-Calu1-pY_run2	14102	3356	4607	20191112_Haura_KRAS-G12C_TMT-Batch2-Calu1-pY_run2	14102	3356	4607	20191112_Haura_KRAS-G12C_TMT-Batch2-Calu1-pY_run2	14102	Phosphorylation (STY)	1	GpYFPRFEEPAPLSYDSRPR	2>>n	1128>>n	1	1	GYFPRFEEPAPLSYDSRPR	GpYFPRFEEPAPLSYDSRPR;Q07157;DLDSRQHPEESSERGYFPRFEEPAPLSYDSR;2;1;2>>n	ph_Q07157:1128
sp|P22626|ROA2_HUMAN	sp|P22626|ROA2_HUMAN	P22626	__Other	P22626	P22626	sp|P22626|ROA2_HUMAN Heterogeneous nuclear ribonucleoproteins A2/B1 OS=Homo sapiens OX=9606 GN=HNRNPA2B1 PE=1 SV=2	0.999867	38.7493	1.77086e-18	118.51	110.33	---	1	MKSGNFGGSRNMGGPYGGGNYGPGGSGGSGG	X;X;X;X;X;X;X;X;X;X;X;X;X;X;X;Phospho (STY);X;X;X;X;X;X;X;X;X;X;X;X;X;X;X	XXXXXXXXXXPPPPPPPPPPPPPPPPPPPPP	NMGGPY(1)GGGNYGPGGSGGSGGYGGR	NMGGPY(38.75)GGGNY(-38.75)GPGGS(-88.49)GGS(-104.78)GGY(-106.77)GGR	6	3	-0.7272	---	---	1471	370	331	331	5876	8414	20191107_Haura_KRAS-G12C_TMT-Batch1-H358-pY_run2	10789	5876	8414	20191107_Haura_KRAS-G12C_TMT-Batch1-H358-pY_run2	10789	5876	8414	20191107_Haura_KRAS-G12C_TMT-Batch1-H358-pY_run2	10789	Phosphorylation (STY)	1	NMGGPpYGGGNYGPGGSGGSGGYGGR	6>>n	331>>n	1	1	NMGGPYGGGNYGPGGSGGSGGYGGR	NMGGPpYGGGNYGPGGSGGSGGYGGR;P22626;MKSGNFGGSRNMGGPYGGGNYGPGGSGGSGG;6;1;6>>n	ph_P22626:331
sp|Q6ZW49|PAXI1_HUMAN	sp|Q6ZW49|PAXI1_HUMAN	Q6ZW49	__Other	Q6ZW49	Q6ZW49	sp|Q6ZW49|PAXI1_HUMAN PAX-interacting protein 1 OS=Homo sapiens OX=9606 GN=PAXIP1 PE=1 SV=2	0.999943	44.7586	0.000859122	93.262	71.716	+	1	DLKLMAYLAGAKYTGYLCRSNTVLICKEPTG	X;X;X;X;X;X;X;X;X;X;X;X;X;X;X;Phospho (STY);X;X;X;X;X;X;X;X;X;X;X;X;X;X;X	XXXXXXXXXXXXPPPPPPPXXXXXXXXXXXX	YTGY(1)LCR	Y(-46.2)T(-44.76)GY(44.76)LCR	4	2	-0.12339	---	---	2106	745	738	738	10413	14693	20191113_Haura_KRAS-G12C_TMT-Batch3-H1792-pY_run1	11058	10413	14693	20191113_Haura_KRAS-G12C_TMT-Batch3-H1792-pY_run1	11058	10413	14693	20191113_Haura_KRAS-G12C_TMT-Batch3-H1792-pY_run1	11058	Phosphorylation (STY)	1	YTGpYLCR	4>>n	738>>n	1	1	YTGYLCR	YTGpYLCR;Q6ZW49;DLKLMAYLAGAKYTGYLCRSNTVLICKEPTG;4;1;4>>n	ph_Q6ZW49:738
sp|P38159|RBMX_HUMAN	sp|P38159|RBMX_HUMAN	P38159;Q96E39	__Other	P38159	P38159	sp|P38159|RBMX_HUMAN RNA-binding motif protein, X chromosome OS=Homo sapiens OX=9606 GN=RBMX PE=1 SV=3;sp|Q96E39|RMXL1_HUMAN RNA binding motif protein, X-linked-like-1 OS=Homo sapiens OX=9606 GN=RBMXL1 PE=1 SV=1	0.999983	47.7697	3.71169e-05	110.61	17.919	+	1	GGPPRREPLPSRRDVYLSPRDDGYSTKDSYS	X;X;X;X;X;X;X;X;X;X;X;X;X;X;X;Phospho (STY);X;X;X;X;X;X;X;Phospho (STY);Phospho (STY);X;X;X;X;X;X	XXXXXXXXXXXXXPPPPPPPXXXXXXXXXXX	DVY(1)LSPR	DVY(47.77)LS(-47.77)PR	3	2	-0.85603	---	---	1575	426	206	206	1648	2235	20191107_Haura_KRAS-G12C_TMT-Batch1-H358-pY_run1	11834	1648	2235	20191107_Haura_KRAS-G12C_TMT-Batch1-H358-pY_run1	11834	1648	2235	20191107_Haura_KRAS-G12C_TMT-Batch1-H358-pY_run1	11834	Phosphorylation (STY)	1	DVpYLSPR	3>>n	206>>n	1	1	DVYLSPR	DVpYLSPR;P38159;Q96E39;GGPPRREPLPSRRDVYLSPRDDGYSTKDSYS;3;1;3>>n	ph_P38159:206
sp|P50238|CRIP1_HUMAN	sp|P50238|CRIP1_HUMAN	P50238	__Other	P50238	P50238	sp|P50238|CRIP1_HUMAN Cysteine-rich protein 1 OS=Homo sapiens OX=9606 GN=CRIP1 PE=1 SV=3	1	88.9423	0.000242842	88.942	50.704	+	1	____MPKCPKCNKEVYFAERVTSLGKDWHRP	X;X;X;X;X;X;X;X;X;X;X;X;X;X;X;Phospho (STY);X;X;X;X;X;X;X;X;X;X;X;X;X;X;X	XXXXXXXXXXPPPPPPPPPPXXXXXXXXXXX	EVY(1)FAER	EVY(88.94)FAER	3	2	-1.4341	---	---	1628	462	12	12	2286	3094	20191112_Haura_KRAS-G12C_TMT-Batch2-Calu1-pY_run2	12372	2286	3094	20191112_Haura_KRAS-G12C_TMT-Batch2-Calu1-pY_run2	12372	2285	3093	20191112_Haura_KRAS-G12C_TMT-Batch2-Calu1-pY_run1	12235	Phosphorylation (STY)	1	EVpYFAER	3,x	12,x	1	1	EVYFAER	EVpYFAER;P50238;____MPKCPKCNKEVYFAERVTSLGKDWHRP;3;1;3,x	ph_P50238:12
sp|Q01995|TAGL_HUMAN	sp|Q01995|TAGL_HUMAN	Q01995	__Other	Q01995	Q01995	sp|Q01995|TAGL_HUMAN Transgelin OS=Homo sapiens OX=9606 GN=TAGLN PE=1 SV=4	0.999992	51.1358	2.31666e-08	166.86	149.92	+	1	QMGSNRGASQAGMTGYGRPRQIIS_______	X;X;X;X;X;X;X;X;X;X;X;X;Oxidation (M);X;X;Phospho (STY);X;X;X;X;X;X;X;X;X;X;X;X;X;X;X	XXXXXXPPPPPPPPPPPPPPXXXXXXXXXXX	GASQAGMTGY(1)GRPR	GAS(-139.34)QAGMT(-51.14)GY(51.14)GRPR	10	3	-2.0816	---	---	1776	559	193	193	2674	3600	20191112_Haura_KRAS-G12C_TMT-Batch2-Calu1-pY_run1	6823	2674	3600	20191112_Haura_KRAS-G12C_TMT-Batch2-Calu1-pY_run1	6823	2674	3600	20191112_Haura_KRAS-G12C_TMT-Batch2-Calu1-pY_run1	6823	Phosphorylation (STY)	1	GASQAGMTGpYGRPR	10>>n	193>>n	1	1	GASQAGMTGYGRPR	GASQAGMTGpYGRPR;Q01995;QMGSNRGASQAGMTGYGRPRQIIS_______;10;1;10>>n	ph_Q01995:193
sp|Q00535|CDK5_HUMAN	sp|Q00535|CDK5_HUMAN	Q00535	__Other	Q00535	Q00535	sp|Q00535|CDK5_HUMAN Cyclin-dependent-like kinase 5 OS=Homo sapiens OX=9606 GN=CDK5 PE=1 SV=3	0.571485	1.26893	0.0021118	107.24	62.935	---	1	__MQKYEKLEKIGEGTYGTVFKAKNRETHEI	X;X;X;X;X;X;X;X;X;X;X;X;X;X;X;Phospho (STY);X;X;X;X;X;X;X;X;X;X;X;X;X;X;X	XXXXXXXXXXXPPPPPPPPPPPXXXXXXXXX	IGEGT(0.571)Y(0.427)GT(0.002)VFK	IGEGT(1.27)Y(-1.27)GT(-24.96)VFK	5	2	-0.30759	---	---	757	548	14	14	3934	5518	20191113_Haura_KRAS-G12C_TMT-Batch3-H1792-pY_run1	14932	3934	5518	20191113_Haura_KRAS-G12C_TMT-Batch3-H1792-pY_run1	14932	3934	5518	20191113_Haura_KRAS-G12C_TMT-Batch3-H1792-pY_run1	14932	Phosphorylation (STY)	1	IGEGpTYGTVFK	5>n	14>n	0.571	0.571	IGEGTYGTVFK	IGEGpTYGTVFK;Q00535;__MQKYEKLEKIGEGTYGTVFKAKNRETHEI;5;1;5>n	ph_Q00535:14
sp|Q96CS3|FAF2_HUMAN	sp|Q96CS3|FAF2_HUMAN	Q96CS3	__Other	Q96CS3	Q96CS3	sp|Q96CS3|FAF2_HUMAN FAS-associated factor 2 OS=Homo sapiens OX=9606 GN=FAF2 PE=1 SV=2	0.536958	1.22958	0.00156604	81.92	58.802	---	1	PSRPLQVNTADHRIYSYVVSRPQPRGLLGWG	X;X;X;X;X;X;X;X;X;X;X;X;X;X;X;Phospho (STY);X;X;X;X;X;X;X;X;X;X;X;X;X;X;X	XXXXXXXXXXXXXPPPPPPPPPPPPXXXXXX	IY(0.405)S(0.537)Y(0.058)VVSRPQPR	IY(-1.23)S(1.23)Y(-9.63)VVS(-60.97)RPQPR	3	3	-1.7989	---	---	433	901	80	80	4217	6138	20191107_Haura_KRAS-G12C_TMT-Batch1-H358-pY_run2	11967	4217	6138	20191107_Haura_KRAS-G12C_TMT-Batch1-H358-pY_run2	11967	4217	6138	20191107_Haura_KRAS-G12C_TMT-Batch1-H358-pY_run2	11967	Phosphorylation (STY)	1	IYpSYVVSRPQPR	3>n	80>n	0.537	0.537	IYSYVVSRPQPR	IYpSYVVSRPQPR;Q96CS3;PSRPLQVNTADHRIYSYVVSRPQPRGLLGWG;3;1;3>n	ph_Q96CS3:80
sp|P06493|CDK1_HUMAN	sp|P06493|CDK1_HUMAN	P06493	__Other	P06493	P06493	sp|P06493|CDK1_HUMAN Cyclin-dependent kinase 1 OS=Homo sapiens OX=9606 GN=CDK1 PE=1 SV=3	1	72.5925	0.000140472	136.27	72.515	+	1	YTKIEKIGEGTYGVVYKGRHKTTGQVVAMKK	X;X;X;X;X;X;X;X;X;X;X;X;X;X;X;Phospho (STY);X;X;X;X;X;X;X;X;X;X;X;X;X;X;X	XXXXXXPPPPPPPPPPPPPXXXXXXXXXXXX	IGEGTYGVVY(1)KGR	IGEGT(-72.59)Y(-78.71)GVVY(72.59)KGR	10	3	-0.53997	---	---	1284	267	19	19	3973	5773	20191107_Haura_KRAS-G12C_TMT-Batch1-H358-pY_run1	12328	3973	5773	20191107_Haura_KRAS-G12C_TMT-Batch1-H358-pY_run1	12328	3973	5773	20191107_Haura_KRAS-G12C_TMT-Batch1-H358-pY_run1	12328	Phosphorylation (STY)	1	IGEGTYGVVpYKGR	10>>n	19>>n	1	1	IGEGTYGVVYKGR	IGEGTYGVVpYKGR;P06493;YTKIEKIGEGTYGVVYKGRHKTTGQVVAMKK;10;1;10>>n	ph_P06493:19
sp|P04083|ANXA1_HUMAN	sp|P04083|ANXA1_HUMAN	P04083	__Other	P04083	P04083	sp|P04083|ANXA1_HUMAN Annexin A1 OS=Homo sapiens OX=9606 GN=ANXA1 PE=1 SV=2	0.997938	27.1938	1.71266e-15	112.54	91.652	+	1	TVKSSKGGPGSAVSPYPTFNPSSDVAALHKA	X;X;X;X;X;X;X;X;X;X;X;X;X;X;X;Phospho (STY);X;X;X;X;X;X;X;X;X;X;X;X;X;X;X	XXXXXXPPPPPPPPPPPPPPPPPPPPPPPPX	GGPGSAVSPY(0.998)PT(0.002)FNPSSDVAALHK	GGPGS(-74.65)AVS(-44.68)PY(27.19)PT(-27.19)FNPS(-42.09)S(-42.09)DVAALHK	10	4	-1.1197	---	---	1254	253	39	39	2831	3928	20191112_Haura_KRAS-G12C_TMT-Batch2-Calu1-pY_run1	14750	2831	3928	20191112_Haura_KRAS-G12C_TMT-Batch2-Calu1-pY_run1	14750	2831	3928	20191112_Haura_KRAS-G12C_TMT-Batch2-Calu1-pY_run1	14750	Phosphorylation (STY)	1	GGPGSAVSPpYPTFNPSSDVAALHK	10>>n	39>>n	0.998	0.998	GGPGSAVSPYPTFNPSSDVAALHK	GGPGSAVSPpYPTFNPSSDVAALHK;P04083;TVKSSKGGPGSAVSPYPTFNPSSDVAALHKA;10;1;10>>n	ph_P04083:39
sp|Q15678|PTN14_HUMAN	sp|Q15678|PTN14_HUMAN	Q15678	__Other	Q15678	Q15678	sp|Q15678|PTN14_HUMAN Tyrosine-protein phosphatase non-receptor type 14 OS=Homo sapiens OX=9606 GN=PTPN14 PE=1 SV=2	0.97984	16.8667	2.10461e-51	223.85	209.95	+	1	NIINTHAYNQPEDLVYSQPEMRERHPYTVPY	X;X;X;X;X;X;X;X;X;X;X;X;X;X;X;Phospho (STY);X;X;X;X;X;X;X;X;X;X;X;X;X;X;X	PPPPPPPPPPPPPPPPPPPPPPXXXXXXXXX	NLNIINTHAYNQPEDLVY(0.98)S(0.02)QPEMR	NLNIINT(-86.26)HAY(-68.45)NQPEDLVY(16.87)S(-16.87)QPEMR	18	4	0.066414	---	---	1998	671	485	485	5845	8381	20191112_Haura_KRAS-G12C_TMT-Batch2-Calu1-pY_run2	15622	5843	8379	20191112_Haura_KRAS-G12C_TMT-Batch2-Calu1-pY_run1	15492	5843	8379	20191112_Haura_KRAS-G12C_TMT-Batch2-Calu1-pY_run1	15492	Phosphorylation (STY)	1	NLNIINTHAYNQPEDLVpYSQPEMR	18>>n	485>>n	0.98	0.98	NLNIINTHAYNQPEDLVYSQPEMR	NLNIINTHAYNQPEDLVpYSQPEMR;Q15678;NIINTHAYNQPEDLVYSQPEMRERHPYTVPY;18;1;18>>n	ph_Q15678:485
sp|P33981|TTK_HUMAN	sp|P33981|TTK_HUMAN	P33981	__Other	P33981	P33981	sp|P33981|TTK_HUMAN Dual specificity protein kinase TTK OS=Homo sapiens OX=9606 GN=TTK PE=1 SV=2	0.998741	28.9941	2.41413e-05	122.93	96.305	+	1	PKSICKTPSSNTLDDYMSCFRTPVVKNDFPP	X;X;X;X;X;X;X;X;X;X;X;X;X;X;X;Phospho (STY);X;X;X;X;X;X;X;X;X;X;X;X;X;X;X	XXXXXXPPPPPPPPPPPPPPPXXXXXXXXXX	TPSSNTLDDY(0.999)MS(0.001)CFR	T(-85.69)PS(-85.69)S(-79.8)NT(-64.67)LDDY(28.99)MS(-28.99)CFR	10	3	0.014872	---	---	1547	410	462	462	8553	12037	20191107_Haura_KRAS-G12C_TMT-Batch1-H358-pY_run1	15305	8555	12039	20191112_Haura_KRAS-G12C_TMT-Batch2-Calu1-pY_run1	15300	8553	12037	20191107_Haura_KRAS-G12C_TMT-Batch1-H358-pY_run1	15305	Phosphorylation (STY)	1	TPSSNTLDDpYMSCFR	10>>n	462>>n	0.999	0.999	TPSSNTLDDYMSCFR	TPSSNTLDDpYMSCFR;P33981;PKSICKTPSSNTLDDYMSCFRTPVVKNDFPP;10;1;10>>n	ph_P33981:462
sp|P35222|CTNB1_HUMAN	sp|P35222|CTNB1_HUMAN	P35222	__Other	P35222	P35222	sp|P35222|CTNB1_HUMAN Catenin beta-1 OS=Homo sapiens OX=9606 GN=CTNNB1 PE=1 SV=1	1	105.116	0.000862921	121.96	92.147	---	1	RHQEAEMAQNAVRLHYGLPVVVKLLHPPSHW	X;X;X;X;X;X;X;X;X;X;X;X;X;X;X;Phospho (STY);X;X;X;X;X;X;X;X;X;X;X;X;X;X;X	XXXXXXXXXXXXXPPPPPPPPPPXXXXXXXX	LHY(1)GLPVVVK	LHY(105.12)GLPVVVK	3	2	2.0297	---	---	1553	415	489	489	4953	7082	20191113_Haura_KRAS-G12C_TMT-Batch3-H1792-pY_run2	14696	4952	7080	20191113_Haura_KRAS-G12C_TMT-Batch3-H1792-pY_run2	14668	4949	7076	20191107_Haura_KRAS-G12C_TMT-Batch1-H358-pY_run2	14776	Phosphorylation (STY)	1	LHpYGLPVVVK	3,x	489,x	1	1	LHYGLPVVVK	LHpYGLPVVVK;P35222;RHQEAEMAQNAVRLHYGLPVVVKLLHPPSHW;3;1;3,x	ph_P35222:489
sp|Q8WXI2|CNKR2_HUMAN	sp|Q8WXI2|CNKR2_HUMAN	Q8WXI2	__Other	Q8WXI2	Q8WXI2	sp|Q8WXI2|CNKR2_HUMAN Connector enhancer of kinase suppressor of ras 2 OS=Homo sapiens OX=9606 GN=CNKSR2 PE=1 SV=1	0.831031	6.96933	0.0208163	55.531	33.383	---	1	KGRSSSQGRRESTPTYGKLRPISMPVEYNWV	X;X;X;X;X;X;X;X;X;X;X;X;X;X;X;Phospho (STY);X;X;X;X;X;X;X;X;X;X;X;X;X;X;X	XXXXXXXXXXPPPPPPPPXXXXXXXXXXXXX	EST(0.002)PT(0.167)Y(0.831)GK	ES(-40.75)T(-26.38)PT(-6.97)Y(6.97)GK	6	2	-0.39888	---	---	2299	869	434	434	2217	2983	20191113_Haura_KRAS-G12C_TMT-Batch3-H1792-pY_run2	8581	2217	2983	20191113_Haura_KRAS-G12C_TMT-Batch3-H1792-pY_run2	8581	2217	2983	20191113_Haura_KRAS-G12C_TMT-Batch3-H1792-pY_run2	8581	Phosphorylation (STY)	1	ESTPTpYGK	6>>n	434>>n	0.831	0.831	ESTPTYGK	ESTPTpYGK;Q8WXI2;KGRSSSQGRRESTPTYGKLRPISMPVEYNWV;6;1;6>>n	ph_Q8WXI2:434
sp|Q9Y4G6|TLN2_HUMAN	sp|Q9Y4G6|TLN2_HUMAN	Q9Y4G6	__Other	Q9Y4G6	Q9Y4G6	sp|Q9Y4G6|TLN2_HUMAN Talin-2 OS=Homo sapiens OX=9606 GN=TLN2 PE=1 SV=4	0.98747	18.9659	1.14149e-11	132.13	114.31	+	1	ITSIRDKAPGQRECDYSIDGINRCIRDIEQA	X;X;X;X;X;X;X;X;X;X;X;X;X;X;X;Phospho (STY);X;X;X;X;X;X;X;X;X;X;X;X;X;X;X	XXXXXPPPPPPPPPPPPPPPPPPXXXXXXXX	DKAPGQRECDY(0.987)S(0.013)IDGINR	DKAPGQRECDY(18.97)S(-18.97)IDGINR	11	4	-2.3239	---	---	2743	1126	1665	1665	1287	1729	20191112_Haura_KRAS-G12C_TMT-Batch2-Calu1-pY_run1	9448	1288	1730	20191112_Haura_KRAS-G12C_TMT-Batch2-Calu1-pY_run2	9593	1288	1730	20191112_Haura_KRAS-G12C_TMT-Batch2-Calu1-pY_run2	9593	Phosphorylation (STY)	1	DKAPGQRECDpYSIDGINR	11>>n	1665>>n	0.987	0.987	DKAPGQRECDYSIDGINR	DKAPGQRECDpYSIDGINR;Q9Y4G6;ITSIRDKAPGQRECDYSIDGINRCIRDIEQA;11;1;11>>n	ph_Q9Y4G6:1665
sp|Q6PKG0|LARP1_HUMAN	sp|Q6PKG0|LARP1_HUMAN	Q6PKG0	__Other	Q6PKG0	Q6PKG0	sp|Q6PKG0|LARP1_HUMAN La-related protein 1 OS=Homo sapiens OX=9606 GN=LARP1 PE=1 SV=2	1	88.0548	3.77264e-05	159.4	125.61	+	1	RGRGRGRGGTRTHFDYQFGYRKFDGVEGPRT	X;X;X;X;X;X;X;X;X;X;X;X;X;X;X;Phospho (STY);X;X;X;X;X;X;X;X;X;X;X;X;X;X;X	XXXXXXXXXXXPPPPPPPPPPXXXXXXXXXX	THFDY(1)QFGYR	T(-97.75)HFDY(88.05)QFGY(-88.05)R	5	3	-2.7373	---	---	2086	733	361	361	8391	11825	20191107_Haura_KRAS-G12C_TMT-Batch1-H358-pY_run1	12251	8391	11825	20191107_Haura_KRAS-G12C_TMT-Batch1-H358-pY_run1	12251	8391	11825	20191107_Haura_KRAS-G12C_TMT-Batch1-H358-pY_run1	12251	Phosphorylation (STY)	1	THFDpYQFGYR	5>>n	361>>n	1	1	THFDYQFGYR	THFDpYQFGYR;Q6PKG0;RGRGRGRGGTRTHFDYQFGYRKFDGVEGPRT;5;1;5>>n	ph_Q6PKG0:361
sp|P45983|MK08_HUMAN	sp|P45983|MK08_HUMAN	P45983;P53779	__Other	P45983	P45983	sp|P45983|MK08_HUMAN Mitogen-activated protein kinase 8 OS=Homo sapiens OX=9606 GN=MAPK8 PE=1 SV=2;sp|P53779|MK10_HUMAN Mitogen-activated protein kinase 10 OS=Homo sapiens OX=9606 GN=MAPK10 PE=1 SV=2	0.998174	27.3757	4.15228e-06	147.35	131.93	+	1;2	FGLARTAGTSFMMTPYVVTRYYRAPEVILGM	X;X;X;X;X;X;X;X;X;X;X;Oxidation (M);Oxidation (M);Phospho (STY);X;Phospho (STY);X;X;X;X;X;X;X;X;X;X;X;X;X;X;X	XXXXXPPPPPPPPPPPPPPPXXXXXXXXXXX	TAGTSFMMT(1)PY(0.998)VVT(0.002)R	T(-99.5)AGT(-94.65)S(-88.2)FMMT(44.71)PY(27.38)VVT(-27.38)R	11	3	-1.3718	---	---	1596	443	185	185	8231	11620	20191112_Haura_KRAS-G12C_TMT-Batch2-Calu1-pY_run2	18298	8221	11608	20191112_Haura_KRAS-G12C_TMT-Batch2-Calu1-pY_run2	16663	8221	11608	20191112_Haura_KRAS-G12C_TMT-Batch2-Calu1-pY_run2	16663	Phosphorylation (STY)	2	TAGTSFMMpTPpYVVTR	9,11>>n	183,185>>n	0.998	0.998	TAGTSFMMTPYVVTR	TAGTSFMMpTPpYVVTR;P45983;P53779;FGLARTAGTSFMMTPYVVTRYYRAPEVILGM;11;2;9,11>>n	ph_P45983:185
sp|Q9UQB8|BAIP2_HUMAN	sp|Q9UQB8|BAIP2_HUMAN	Q9UQB8	__Other	Q9UQB8	Q9UQB8	sp|Q9UQB8|BAIP2_HUMAN Brain-specific angiogenesis inhibitor 1-associated protein 2 OS=Homo sapiens OX=9606 GN=BAIAP2 PE=1 SV=1	0.999283	32.9346	0.00029376	136.63	97.617	+	1	SNTLPVRKSVTPKNSYATTENKTLPRSSSMA	Phospho (STY);X;Phospho (STY);X;X;X;X;X;X;X;X;X;X;X;X;Phospho (STY);X;X;X;X;X;X;X;X;X;X;X;X;X;X;X	XXXXXXXXXXXXXPPPPPPPPPXXXXXXXXX	NS(0.001)Y(0.999)ATTENK	NS(-32.93)Y(32.93)AT(-36.82)T(-62.65)ENK	3	3	1.9236	---	---	2702	1106	353	353	6029	8600	20191112_Haura_KRAS-G12C_TMT-Batch2-Calu1-pY_run1	7728	6031	8602	20191112_Haura_KRAS-G12C_TMT-Batch2-Calu1-pY_run2	7821	6031	8602	20191112_Haura_KRAS-G12C_TMT-Batch2-Calu1-pY_run2	7821	Phosphorylation (STY)	1	NSpYATTENK	3>>n	353>>n	0.999	0.999	NSYATTENK	NSpYATTENK;Q9UQB8;SNTLPVRKSVTPKNSYATTENKTLPRSSSMA;3;1;3>>n	ph_Q9UQB8:353
sp|Q6NZI2|CAVN1_HUMAN	sp|Q6NZI2|CAVN1_HUMAN	Q6NZI2	__Other	Q6NZI2	Q6NZI2	sp|Q6NZI2|CAVN1_HUMAN Caveolae-associated protein 1 OS=Homo sapiens OX=9606 GN=CAVIN1 PE=1 SV=1	0.992262	21.0801	3.89799e-13	202	185.65	---	2	ERREKLKTSRDKLRKSFTPDHVVYARSKTAV	X;X;X;X;X;X;X;X;X;X;X;X;X;X;X;Phospho (STY);X;X;X;X;X;X;X;Phospho (STY);X;X;X;X;Phospho (STY);X;X	XXXXXXXXXXXXXXPPPPPPPPPPPPXXXXX	S(0.992)FT(0.008)PDHVVY(1)AR	S(21.08)FT(-21.08)PDHVVY(113.88)AR	1	2	-1.1297	---	---	351	731	300	300	7116	10055	20191112_Haura_KRAS-G12C_TMT-Batch2-Calu1-pY_run2	12946	7114	10051	20191112_Haura_KRAS-G12C_TMT-Batch2-Calu1-pY_run1	12832	7114	10051	20191112_Haura_KRAS-G12C_TMT-Batch2-Calu1-pY_run1	12832	Phosphorylation (STY)	2	pSFTPDHVVpYAR	9,1>>n	308,300>>n	0.992	0.992	SFTPDHVVYAR	pSFTPDHVVpYAR;Q6NZI2;ERREKLKTSRDKLRKSFTPDHVVYARSKTAV;1;2;9,1>>n	ph_Q6NZI2:300
sp|Q92753|RORB_HUMAN	sp|Q92753|RORB_HUMAN	Q92753	__Other	Q92753	Q92753	sp|Q92753|RORB_HUMAN Nuclear receptor ROR-beta OS=Homo sapiens OX=9606 GN=RORB PE=1 SV=3	1	41.9839	0.028729	41.984	14.459	+	1	RAFNPLNNTVLFEGKYGGMQMFKALGSDDLV	X;X;X;X;X;X;X;X;X;X;X;X;X;X;X;Phospho (STY);X;X;Oxidation (M);X;X;X;X;X;X;X;X;X;X;X;X	XXXXXXXXXXXXXXXPPPPPPPPXXXXXXXX	Y(1)GGMQMFK	Y(41.98)GGMQMFK	1	3	0.71217	---	---	2314	882	335	335	9929	14075	20191107_Haura_KRAS-G12C_TMT-Batch1-H358-pY_run2	11808	9929	14075	20191107_Haura_KRAS-G12C_TMT-Batch1-H358-pY_run2	11808	9929	14075	20191107_Haura_KRAS-G12C_TMT-Batch1-H358-pY_run2	11808	Phosphorylation (STY)	1	pYGGMQMFK	1,x	335,x	1	1	YGGMQMFK	pYGGMQMFK;Q92753;RAFNPLNNTVLFEGKYGGMQMFKALGSDDLV;1;1;1,x	ph_Q92753:335
sp|Q8WWI1|LMO7_HUMAN	sp|Q8WWI1|LMO7_HUMAN	Q8WWI1	__Other	Q8WWI1	Q8WWI1	sp|Q8WWI1|LMO7_HUMAN LIM domain only protein 7 OS=Homo sapiens OX=9606 GN=LMO7 PE=1 SV=3	0.97694	17.4805	2.37878e-05	126.48	104.93	+	1	LITLYWLGRKAQSNPYYNGPHLNLKAFENLL	X;X;X;X;X;X;X;X;X;X;X;X;X;X;X;Phospho (STY);X;X;X;X;X;X;X;X;X;X;X;X;X;X;X	XXXXXXXXXXPPPPPPPPPPPPPPPXXXXXX	AQS(0.006)NPY(0.977)Y(0.017)NGPHLNLK	AQS(-22.41)NPY(17.48)Y(-17.48)NGPHLNLK	6	3	-0.49907	---	---	2286	862	185	185	659	953	20191112_Haura_KRAS-G12C_TMT-Batch2-Calu1-pY_run1	12544	660	954	20191112_Haura_KRAS-G12C_TMT-Batch2-Calu1-pY_run2	12660	660	954	20191112_Haura_KRAS-G12C_TMT-Batch2-Calu1-pY_run2	12660	Phosphorylation (STY)	1	AQSNPpYYNGPHLNLK	6>>n	185>>n	0.977	0.977	AQSNPYYNGPHLNLK	AQSNPpYYNGPHLNLK;Q8WWI1;LITLYWLGRKAQSNPYYNGPHLNLKAFENLL;6;1;6>>n	ph_Q8WWI1:185
sp|Q13573|SNW1_HUMAN	sp|Q13573|SNW1_HUMAN	Q13573	__Other	Q13573	Q13573	sp|Q13573|SNW1_HUMAN SNW domain-containing protein 1 OS=Homo sapiens OX=9606 GN=SNW1 PE=1 SV=1	0.89342	9.23379	0.0216352	57.598	30.5	+	1	YDAIARQGQSKDKVIYSKYTDLVPKEVMNAD	X;X;X;X;X;X;X;X;X;X;X;X;X;X;X;Phospho (STY);X;X;X;X;X;X;X;X;X;X;X;X;X;X;X	XXXXXXXXXXXPPPPPPPXXXXXXXXXXXXX	DKVIY(0.893)S(0.107)K	DKVIY(9.23)S(-9.23)K	5	3	1.374	---	---	1906	619	113	113	1309	1755	20191113_Haura_KRAS-G12C_TMT-Batch3-H1792-pY_run2	10344	1308	1754	20191113_Haura_KRAS-G12C_TMT-Batch3-H1792-pY_run1	10284	1308	1754	20191113_Haura_KRAS-G12C_TMT-Batch3-H1792-pY_run1	10284	Phosphorylation (STY)	1	DKVIpYSK	5>>n	113>>n	0.893	0.893	DKVIYSK	DKVIpYSK;Q13573;YDAIARQGQSKDKVIYSKYTDLVPKEVMNAD;5;1;5>>n	ph_Q13573:113
sp|Q96QD8|S38A2_HUMAN	sp|Q96QD8|S38A2_HUMAN	Q96QD8	__Other	Q96QD8	Q96QD8	sp|Q96QD8|S38A2_HUMAN Sodium-coupled neutral amino acid transporter 2 OS=Homo sapiens OX=9606 GN=SLC38A2 PE=1 SV=2	0.990323	20.1006	7.61173e-91	261.78	247	+	1	FNYSYPTKQAALKSHYADVDPENQNFLLESN	X;X;Phospho (STY);X;X;X;X;X;X;X;X;X;X;X;X;Phospho (STY);X;X;X;X;X;X;X;X;X;X;X;X;X;X;X	XXXXXXXXPPPPPPPPPPPPPPPPPPPPPPP	S(0.01)HY(0.99)ADVDPENQNFLLESNLGKK	S(-20.1)HY(20.1)ADVDPENQNFLLES(-247.96)NLGKK	3	4	1.6922	---	---	2391	928	41	41	7248	10217	20191112_Haura_KRAS-G12C_TMT-Batch2-Calu1-pY_run1	14428	7248	10217	20191112_Haura_KRAS-G12C_TMT-Batch2-Calu1-pY_run1	14428	7248	10217	20191112_Haura_KRAS-G12C_TMT-Batch2-Calu1-pY_run1	14428	Phosphorylation (STY)	1	SHpYADVDPENQNFLLESNLGKK	3>>n	41>>n	0.99	0.99	SHYADVDPENQNFLLESNLGKK	SHpYADVDPENQNFLLESNLGKK;Q96QD8;FNYSYPTKQAALKSHYADVDPENQNFLLESN;3;1;3>>n	ph_Q96QD8:41
sp|P07910|HNRPC_HUMAN	sp|P07910|HNRPC_HUMAN	P07910	__Other	P07910	P07910	sp|P07910|HNRPC_HUMAN Heterogeneous nuclear ribonucleoproteins C1/C2 OS=Homo sapiens OX=9606 GN=HNRNPC PE=1 SV=4	0.9998	37.8657	0.000281288	97.071	57.529	+	1	LDYDFQRDYYDRMYSYPARVPPPPPIARAVV	X;X;X;X;X;X;X;X;X;X;X;X;X;X;X;Phospho (STY);X;X;X;X;X;X;X;X;X;X;X;X;X;X;X	XXXXXXXXXXXXPPPPPPPXXXXXXXXXXXX	MYSY(1)PAR	MY(-37.87)S(-44.35)Y(37.87)PAR	4	2	-0.35658	---	---	1308	276	139	139	5679	8117	20191107_Haura_KRAS-G12C_TMT-Batch1-H358-pY_run1	9899	5679	8117	20191107_Haura_KRAS-G12C_TMT-Batch1-H358-pY_run1	9899	5679	8117	20191107_Haura_KRAS-G12C_TMT-Batch1-H358-pY_run1	9899	Phosphorylation (STY)	1	MYSpYPAR	4>>n	139>>n	1	1	MYSYPAR	MYSpYPAR;P07910;LDYDFQRDYYDRMYSYPARVPPPPPIARAVV;4;1;4>>n	ph_P07910:139
sp|O00151|PDLI1_HUMAN	sp|O00151|PDLI1_HUMAN	O00151	__Other	O00151	O00151	sp|O00151|PDLI1_HUMAN PDZ and LIM domain protein 1 OS=Homo sapiens OX=9606 GN=PDLIM1 PE=1 SV=4	0.890553	9.64542	9.8225e-31	175.11	164.4	+	1	TARVITNQYNNPAGLYSSENISNFNNALESK	X;X;X;X;X;X;X;X;X;X;X;X;X;X;X;Phospho (STY);X;X;X;X;X;X;X;X;X;X;X;X;X;X;X	XXXPPPPPPPPPPPPPPPPPPPPPPPPPPPP	VITNQYNNPAGLY(0.891)S(0.097)S(0.013)ENISNFNNALESK	VIT(-92.26)NQY(-59.02)NNPAGLY(9.65)S(-9.65)S(-18.42)ENIS(-60.19)NFNNALES(-113.5)K	13	3	0.34079	---	---	1045	120	151	151	9176	12951	20191112_Haura_KRAS-G12C_TMT-Batch2-Calu1-pY_run2	17721	9176	12951	20191112_Haura_KRAS-G12C_TMT-Batch2-Calu1-pY_run2	17721	9176	12951	20191112_Haura_KRAS-G12C_TMT-Batch2-Calu1-pY_run2	17721	Phosphorylation (STY)	1	VITNQYNNPAGLpYSSENISNFNNALESK	13>>n	151>>n	0.891	0.891	VITNQYNNPAGLYSSENISNFNNALESK	VITNQYNNPAGLpYSSENISNFNNALESK;O00151;TARVITNQYNNPAGLYSSENISNFNNALESK;13;1;13>>n	ph_O00151:151
sp|P07910|HNRPC_HUMAN	sp|P07910|HNRPC_HUMAN	P07910	__Other	P07910	P07910	sp|P07910|HNRPC_HUMAN Heterogeneous nuclear ribonucleoproteins C1/C2 OS=Homo sapiens OX=9606 GN=HNRNPC PE=1 SV=4	0.625055	2.80723	0.00192421	76.655	55.815	---	1	DLDYDFQRDYYDRMYSYPARVPPPPPIARAV	X;X;X;X;X;X;X;X;X;X;X;X;X;X;X;Phospho (STY);X;X;X;X;X;X;X;X;X;X;X;X;X;X;X	XXXXXXXXPPPPPPPPPPPPXXXXXXXXXXX	DYY(0.001)DRMY(0.327)S(0.625)Y(0.047)PAR	DY(-39.23)Y(-30.06)DRMY(-2.81)S(2.81)Y(-11.26)PAR	8	3	-0.46925	---	---	132	276	138	138	1703	2301	20191113_Haura_KRAS-G12C_TMT-Batch3-H1792-pY_run2	11193	1703	2301	20191113_Haura_KRAS-G12C_TMT-Batch3-H1792-pY_run2	11193	1703	2301	20191113_Haura_KRAS-G12C_TMT-Batch3-H1792-pY_run2	11193	Phosphorylation (STY)	1	DYYDRMYpSYPAR	8>n	138>n	0.625	0.625	DYYDRMYSYPAR	DYYDRMYpSYPAR;P07910;DLDYDFQRDYYDRMYSYPARVPPPPPIARAV;8;1;8>n	ph_P07910:138
sp|P46108|CRK_HUMAN	sp|P46108|CRK_HUMAN	P46108	__Other	P46108	P46108	sp|P46108|CRK_HUMAN Adapter molecule crk OS=Homo sapiens OX=9606 GN=CRK PE=1 SV=2	1	49.418	0.0325069	49.418	24.495	+	1	SRQGSGVILRQEEAEYVRALFDFNGNDEEDL	X;X;X;X;X;X;X;X;X;X;X;X;X;X;X;Phospho (STY);X;X;X;X;X;X;X;X;X;X;X;X;X;X;X	XXXXXXXXXXPPPPPPPPXXXXXXXXXXXXX	QEEAEY(1)VR	QEEAEY(49.42)VR	6	2	-1.1826	---	---	1598	445	136	136	6298	8971	20191112_Haura_KRAS-G12C_TMT-Batch2-Calu1-pY_run1	7821	6298	8971	20191112_Haura_KRAS-G12C_TMT-Batch2-Calu1-pY_run1	7821	6298	8971	20191112_Haura_KRAS-G12C_TMT-Batch2-Calu1-pY_run1	7821	Phosphorylation (STY)	1	QEEAEpYVR	6,x	136,x	1	1	QEEAEYVR	QEEAEpYVR;P46108;SRQGSGVILRQEEAEYVRALFDFNGNDEEDL;6;1;6,x	ph_P46108:136
sp|Q9NR45|SIAS_HUMAN	sp|Q9NR45|SIAS_HUMAN	Q9NR45	__Other	Q9NR45	Q9NR45	sp|Q9NR45|SIAS_HUMAN Sialic acid synthase OS=Homo sapiens OX=9606 GN=NANS PE=1 SV=2	0.818443	7.16891	0.0189867	53.327	26.212	---	1	SELEFKFNRKALERPYTSKHSWGKTYGEHKR	X;X;X;X;X;X;X;X;X;X;X;X;X;X;X;Phospho (STY);X;X;X;X;X;X;X;X;X;X;X;X;X;X;X	XXXXXXXXXXPPPPPPPPPXXXXXXXXXXXX	ALERPY(0.818)T(0.157)S(0.024)K	ALERPY(7.17)T(-7.17)S(-15.24)K	6	3	0.33955	---	---	2586	1023	71	71	464	674	20191113_Haura_KRAS-G12C_TMT-Batch3-H1792-pY_run1	8962	464	674	20191113_Haura_KRAS-G12C_TMT-Batch3-H1792-pY_run1	8962	464	674	20191113_Haura_KRAS-G12C_TMT-Batch3-H1792-pY_run1	8962	Phosphorylation (STY)	1	ALERPpYTSK	6>>n	71>>n	0.818	0.818	ALERPYTSK	ALERPpYTSK;Q9NR45;SELEFKFNRKALERPYTSKHSWGKTYGEHKR;6;1;6>>n	ph_Q9NR45:71
sp|Q9NXD2|MTMRA_HUMAN	sp|Q9NXD2|MTMRA_HUMAN	Q9NXD2	__Other	Q9NXD2	Q9NXD2	sp|Q9NXD2|MTMRA_HUMAN Myotubularin-related protein 10 OS=Homo sapiens OX=9606 GN=MTMR10 PE=1 SV=3	1	99.1476	2.30182e-83	284.12	258	+	1	SRMLRQQRSGPLEACYGELGQSRMYFNASGP	X;X;X;X;X;X;X;X;X;X;X;X;X;X;X;Phospho (STY);X;X;X;X;X;X;X;X;X;X;X;X;X;X;X	XXXXXXXXPPPPPPPPPPPPPPPXXXXXXXX	SGPLEACY(1)GELGQSR	S(-119.45)GPLEACY(99.15)GELGQS(-99.15)R	8	3	-0.34337	---	---	2612	1045	708	708	7159	10100	20191112_Haura_KRAS-G12C_TMT-Batch2-Calu1-pY_run2	12734	7158	10098	20191112_Haura_KRAS-G12C_TMT-Batch2-Calu1-pY_run1	12529	7158	10098	20191112_Haura_KRAS-G12C_TMT-Batch2-Calu1-pY_run1	12529	Phosphorylation (STY)	1	SGPLEACpYGELGQSR	8>>n	708>>n	1	1	SGPLEACYGELGQSR	SGPLEACpYGELGQSR;Q9NXD2;SRMLRQQRSGPLEACYGELGQSRMYFNASGP;8;1;8>>n	ph_Q9NXD2:708
sp|Q05655|KPCD_HUMAN	sp|Q05655|KPCD_HUMAN	Q05655	__Other	Q05655	Q05655	sp|Q05655|KPCD_HUMAN Protein kinase C delta type OS=Homo sapiens OX=9606 GN=PRKCD PE=1 SV=2	1	135.398	6.21431e-39	220.6	191.79	+	1;2;3	ASRRSDSASSEPVGIYQGFEKKTGVAGEDMQ	X;Phospho (STY);X;X;Phospho (STY);X;Phospho (STY);X;Phospho (STY);Phospho (STY);X;X;X;X;X;Phospho (STY);X;X;X;X;X;X;X;X;X;X;X;X;X;Oxidation (M);X	PPPPPPPPPPPPPPPPPPPPPPXXXXXXXXX	SDSASSEPVGIY(1)QGFEK	S(-154.68)DS(-148.73)AS(-142.63)S(-135.4)EPVGIY(135.4)QGFEK	12	3	-0.80562	---	---	1803	568	313	313	6953	9787	20191112_Haura_KRAS-G12C_TMT-Batch2-Calu1-pY_run1	14339	6953	9787	20191112_Haura_KRAS-G12C_TMT-Batch2-Calu1-pY_run1	14339	6953	9787	20191112_Haura_KRAS-G12C_TMT-Batch2-Calu1-pY_run1	14339	Phosphorylation (STY)	1	SDSASSEPVGIpYQGFEK	12>>n	313>>n	1	1	SDSASSEPVGIYQGFEK	SDSASSEPVGIpYQGFEK;Q05655;ASRRSDSASSEPVGIYQGFEKKTGVAGEDMQ;12;1;12>>n	ph_Q05655:313
sp|Q8IZP0|ABI1_HUMAN	sp|Q8IZP0|ABI1_HUMAN	Q8IZP0	__Other	Q8IZP0	Q8IZP0	sp|Q8IZP0|ABI1_HUMAN Abl interactor 1 OS=Homo sapiens OX=9606 GN=ABI1 PE=1 SV=4	0.995338	24.0038	7.78937e-45	230.62	211.3	+	1	YKTLEPVKPPTVPNDYMTSPARLGSQHSPGR	X;X;X;X;X;X;X;X;X;X;X;X;X;X;X;Phospho (STY);Oxidation (M);X;X;X;X;X;X;X;X;X;X;X;X;X;X	XXPPPPPPPPPPPPPPPPPPPPXXXXXXXXX	TLEPVKPPTVPNDY(0.995)MT(0.004)S(0.001)PAR	T(-107.44)LEPVKPPT(-80.34)VPNDY(24)MT(-24)S(-31.51)PAR	14	4	-1.351	---	---	2189	802	213	213	8452	11915	20191112_Haura_KRAS-G12C_TMT-Batch2-Calu1-pY_run1	14009	8455	11924	20191113_Haura_KRAS-G12C_TMT-Batch3-H1792-pY_run1	13923	8455	11924	20191113_Haura_KRAS-G12C_TMT-Batch3-H1792-pY_run1	13923	Phosphorylation (STY)	1	TLEPVKPPTVPNDpYMTSPAR	14>>n	213>>n	0.995	0.995	TLEPVKPPTVPNDYMTSPAR	TLEPVKPPTVPNDpYMTSPAR;Q8IZP0;YKTLEPVKPPTVPNDYMTSPARLGSQHSPGR;14;1;14>>n	ph_Q8IZP0:213
sp|O60927|PP1RB_HUMAN	sp|O60927|PP1RB_HUMAN	O60927	__Other	O60927	O60927	sp|O60927|PP1RB_HUMAN E3 ubiquitin-protein ligase PPP1R11 OS=Homo sapiens OX=9606 GN=PPP1R11 PE=1 SV=1	1	109.714	0.000296026	109.71	86.478	+	1	DNEHMGRRSSKCCCIYEKPRAFGESSTESDE	X;X;X;X;X;X;X;X;X;X;X;X;X;X;X;Phospho (STY);X;X;X;X;X;X;X;X;X;X;X;X;X;X;X	XXXXXXXXXXXPPPPPPPPPXXXXXXXXXXX	CCCIY(1)EKPR	CCCIY(109.71)EKPR	5	3	0.52907	---	---	1169	193	64	64	1029	1440	20191112_Haura_KRAS-G12C_TMT-Batch2-Calu1-pY_run2	9040	1029	1440	20191112_Haura_KRAS-G12C_TMT-Batch2-Calu1-pY_run2	9040	1029	1440	20191112_Haura_KRAS-G12C_TMT-Batch2-Calu1-pY_run2	9040	Phosphorylation (STY)	1	CCCIpYEKPR	5,x	64,x	1	1	CCCIYEKPR	CCCIpYEKPR;O60927;DNEHMGRRSSKCCCIYEKPRAFGESSTESDE;5;1;5,x	ph_O60927:64
sp|O75886|STAM2_HUMAN	sp|O75886|STAM2_HUMAN	O75886	__Other	O75886	O75886	sp|O75886|STAM2_HUMAN Signal transducing adapter molecule 2 OS=Homo sapiens OX=9606 GN=STAM2 PE=1 SV=1	0.999233	31.1666	0.00023774	127.37	95.365	+	1	EALELYNKLVNEAPVYSVYSKLHPPAHYPPA	X;X;X;X;X;X;X;X;X;X;X;X;X;X;X;Phospho (STY);X;X;X;X;X;X;X;X;X;X;X;X;X;X;X	XXXXXXXXPPPPPPPPPPPPPXXXXXXXXXX	LVNEAPVY(0.999)S(0.001)VYSK	LVNEAPVY(31.17)S(-31.17)VY(-55.71)S(-71.94)K	8	3	1.2181	---	---	1191	208	371	371	5342	7728	20191112_Haura_KRAS-G12C_TMT-Batch2-Calu1-pY_run1	15605	5343	7729	20191112_Haura_KRAS-G12C_TMT-Batch2-Calu1-pY_run1	15626	5342	7728	20191112_Haura_KRAS-G12C_TMT-Batch2-Calu1-pY_run1	15605	Phosphorylation (STY)	1	LVNEAPVpYSVYSK	8>>n	371>>n	0.999	0.999	LVNEAPVYSVYSK	LVNEAPVpYSVYSK;O75886;EALELYNKLVNEAPVYSVYSKLHPPAHYPPA;8;1;8>>n	ph_O75886:371
sp|P47712|PA24A_HUMAN	sp|P47712|PA24A_HUMAN	P47712	__Other	P47712	P47712	sp|P47712|PA24A_HUMAN Cytosolic phospholipase A2 OS=Homo sapiens OX=9606 GN=PLA2G4A PE=1 SV=2	1	97.2723	0.000484352	98.392	57.96	+	1	ELDAAVADPDEFERIYEPLDVKSKKIHVVDS	X;X;X;X;X;X;X;X;X;X;X;X;X;X;X;Phospho (STY);X;X;X;X;X;X;X;X;X;X;X;X;X;X;X	XXXXXXXXXXXXXXPPPPPPPPXXXXXXXXX	IY(1)EPLDVK	IY(97.27)EPLDVK	2	2	0.93112	---	---	1618	453	535	535	4141	5977	20191113_Haura_KRAS-G12C_TMT-Batch3-H1792-pY_run2	15235	4140	5976	20191113_Haura_KRAS-G12C_TMT-Batch3-H1792-pY_run1	15144	4140	5976	20191113_Haura_KRAS-G12C_TMT-Batch3-H1792-pY_run1	15144	Phosphorylation (STY)	1	IpYEPLDVK	2,x	535,x	1	1	IYEPLDVK	IpYEPLDVK;P47712;ELDAAVADPDEFERIYEPLDVKSKKIHVVDS;2;1;2,x	ph_P47712:535
sp|Q9H5V8|CDCP1_HUMAN	sp|Q9H5V8|CDCP1_HUMAN	Q9H5V8	__Other	Q9H5V8	Q9H5V8	sp|Q9H5V8|CDCP1_HUMAN CUB domain-containing protein 1 OS=Homo sapiens OX=9606 GN=CDCP1 PE=1 SV=3	0.986153	18.8535	3.09955e-239	345.43	315.33	---	1;2	EEPPPRSPPESESEPYTFSHPNNGDVSSKDT	X;X;X;X;X;X;Phospho (STY);X;X;X;Phospho (STY);X;X;X;X;Phospho (STY);X;X;X;X;X;X;X;X;X;X;X;X;X;X;X	PPPPPPPPPPPPPPPPPPPPPPPPPPPPPXX	SPPESES(0.001)EPY(0.986)T(0.013)FSHPNNGDVSSK	S(-77.97)PPES(-38.59)ES(-30.66)EPY(18.85)T(-18.85)FS(-46.59)HPNNGDVS(-148.51)S(-155.56)K	10	3	0.15534	---	---	2526	997	806	806	7642	10831	20191112_Haura_KRAS-G12C_TMT-Batch2-Calu1-pY_run2	10918	4791	6833	20191112_Haura_KRAS-G12C_TMT-Batch2-Calu1-pY_run2	11620	4791	6833	20191112_Haura_KRAS-G12C_TMT-Batch2-Calu1-pY_run2	11620	Phosphorylation (STY)	1	SPPESESEPpYTFSHPNNGDVSSK	10>>n	806>>n	0.986	0.986	SPPESESEPYTFSHPNNGDVSSK	SPPESESEPpYTFSHPNNGDVSSK;Q9H5V8;EEPPPRSPPESESEPYTFSHPNNGDVSSKDT;10;1;10>>n	ph_Q9H5V8:806
sp|Q8IUD2|RB6I2_HUMAN	sp|Q8IUD2|RB6I2_HUMAN	Q8IUD2	__Other	Q8IUD2	Q8IUD2	sp|Q8IUD2|RB6I2_HUMAN ELKS/Rab6-interacting/CAST family member 1 OS=Homo sapiens OX=9606 GN=ERC1 PE=1 SV=1	0.500441	0	0.0078846	42.789	9.482	---	2	SAKTKALQTVIEMKDSKISSMERGLRDLEEE	X;X;X;X;X;X;X;X;X;X;X;X;X;X;X;X;X;X;X;X;X;X;X;X;X;X;X;X;X;X;X	XXXXXXXXXXXXXXXXXXXXXXXXXXXXXXX	T(0.999)KALQT(0.5)VIEMKDS(0.5)K	T(27.53)KALQT(0)VIEMKDS(0)K	13	4	-3.9845	---	---	376	783	389	389	8430	11878	20191113_Haura_KRAS-G12C_TMT-Batch3-H1792-pY_run1	9150	8430	11878	20191113_Haura_KRAS-G12C_TMT-Batch3-H1792-pY_run1	9150	8430	11878	20191113_Haura_KRAS-G12C_TMT-Batch3-H1792-pY_run1	9150	Phosphorylation (STY)	2	pTKALQTVIEMKDpSK	1>>13,n	377>>389,n	0.5	0.499	TKALQTVIEMKDSK	pTKALQTVIEMKDpSK;Q8IUD2;SAKTKALQTVIEMKDSKISSMERGLRDLEEE;13;2;1>>13,n	ph_Q8IUD2:389
sp|Q8IUD2|RB6I2_HUMAN	sp|Q8IUD2|RB6I2_HUMAN	Q8IUD2	__Other	Q8IUD2	Q8IUD2	sp|Q8IUD2|RB6I2_HUMAN ELKS/Rab6-interacting/CAST family member 1 OS=Homo sapiens OX=9606 GN=ERC1 PE=1 SV=1	0.999119	27.5345	0.0078846	42.789	9.482	---	2	EEMHRRFENAPDSAKTKALQTVIEMKDSKIS	X;X;X;X;X;X;X;X;X;X;X;X;X;X;X;Phospho (STY);X;X;X;X;Phospho (STY);X;X;X;Oxidation (M);X;X;X;X;X;X	XXXXXXXXXXXXXXXPPPPPPPPPPPPPPXX	T(0.999)KALQT(0.5)VIEMKDS(0.5)K	T(27.53)KALQT(0)VIEMKDS(0)K	1	4	-3.9845	---	---	839	783	377	377	8430	11878	20191113_Haura_KRAS-G12C_TMT-Batch3-H1792-pY_run1	9150	8430	11878	20191113_Haura_KRAS-G12C_TMT-Batch3-H1792-pY_run1	9150	8430	11878	20191113_Haura_KRAS-G12C_TMT-Batch3-H1792-pY_run1	9150	Phosphorylation (STY)	2	pTKALQpTVIEMKDSK	1>>6,n	377>>382,n	0.999	0.499	TKALQTVIEMKDSK	pTKALQpTVIEMKDSK;Q8IUD2;EEMHRRFENAPDSAKTKALQTVIEMKDSKIS;1;2;1>>6,n	ph_Q8IUD2:377
sp|Q8IUD2|RB6I2_HUMAN	sp|Q8IUD2|RB6I2_HUMAN	Q8IUD2	__Other	Q8IUD2	Q8IUD2	sp|Q8IUD2|RB6I2_HUMAN ELKS/Rab6-interacting/CAST family member 1 OS=Homo sapiens OX=9606 GN=ERC1 PE=1 SV=1	0.500441	0	0.0078846	42.789	9.482	---	2	RFENAPDSAKTKALQTVIEMKDSKISSMERG	X;X;X;X;X;X;X;X;X;X;Phospho (STY);X;X;X;X;Phospho (STY);X;X;X;Oxidation (M);X;X;X;X;X;X;X;X;X;X;X	XXXXXXXXXXPPPPPPPPPPPPPPXXXXXXX	T(0.999)KALQT(0.5)VIEMKDS(0.5)K	T(27.53)KALQT(0)VIEMKDS(0)K	6	4	-3.9845	---	---	840	783	382	382	8430	11878	20191113_Haura_KRAS-G12C_TMT-Batch3-H1792-pY_run1	9150	8430	11878	20191113_Haura_KRAS-G12C_TMT-Batch3-H1792-pY_run1	9150	8430	11878	20191113_Haura_KRAS-G12C_TMT-Batch3-H1792-pY_run1	9150	Phosphorylation (STY)	2	pTKALQpTVIEMKDSK	1>>6,n	377>>382,n	0.5	0.499	TKALQTVIEMKDSK	pTKALQpTVIEMKDSK;Q8IUD2;RFENAPDSAKTKALQTVIEMKDSKISSMERG;6;2;1>>6,n	ph_Q8IUD2:382
sp|P08729|K2C7_HUMAN	sp|P08729|K2C7_HUMAN	CON__P08729;CON__P08729;CON__Q3KNV1	__Other	CON__P08729	CON__P08729	sp|P08729|K2C7_HUMAN Keratin, type II cytoskeletal 7 OS=Homo sapiens OX=9606 GN=KRT7 PE=1 SV=5	0.564455	5.79789	0.0190162	41.89	31.405	---	2	RPGGLGSSSLYGLGASRPRVAVRSAYGGPVG	X;X;X;X;X;X;X;X;X;X;X;X;X;X;X;Phospho (STY);X;X;X;X;X;X;X;X;X;Phospho (STY);X;X;X;X;X	PPPPPPPPPPPPPPPPPPPXXXXXXXXXXXX	LS(0.501)S(0.497)ARPGGLGS(0.101)S(0.097)S(0.093)LY(0.146)GLGAS(0.564)RPR	LS(0)S(0)ARPGGLGS(-7.48)S(-7.68)S(-7.88)LY(-5.8)GLGAS(5.8)RPR	20	3	-1.7001	---	+	8	5	45	45	5297	7679	20191112_Haura_KRAS-G12C_TMT-Batch2-Calu1-pY_run1	13261	5297	7679	20191112_Haura_KRAS-G12C_TMT-Batch2-Calu1-pY_run1	13261	5297	7679	20191112_Haura_KRAS-G12C_TMT-Batch2-Calu1-pY_run1	13261	Phosphorylation (STY)	2	LpSSARPGGLGSSSLYGLGApSRPR	20>2,n	45>27,n	0.564	0.283	LSSARPGGLGSSSLYGLGASRPR	LpSSARPGGLGSSSLYGLGApSRPR;CON__P08729;CON__P08729;CON__Q3KNV1;RPGGLGSSSLYGLGASRPRVAVRSAYGGPVG;20;2;20>2,n	ph_P08729:45
sp|P61927|RL37_HUMAN	sp|P61927|RL37_HUMAN	P61927	__Other	P61927	P61927	sp|P61927|RL37_HUMAN 60S ribosomal protein L37 OS=Homo sapiens OX=9606 GN=RPL37 PE=1 SV=2	1	61.8369	0.00891311	61.837	38.28	+	1	SKAYHLQKSTCGKCGYPAKRKRKYNWSAKAK	X;X;X;X;X;X;X;X;X;X;X;X;X;X;X;Phospho (STY);X;X;X;X;X;X;X;X;X;X;X;X;X;X;X	XXXXXXXXXXXXXPPPPPPPXXXXXXXXXXX	CGY(1)PAKR	CGY(61.84)PAKR	3	3	0.23843	---	---	1704	510	39	39	1043	1454	20191107_Haura_KRAS-G12C_TMT-Batch1-H358-pY_run1	6659	1043	1454	20191107_Haura_KRAS-G12C_TMT-Batch1-H358-pY_run1	6659	1043	1454	20191107_Haura_KRAS-G12C_TMT-Batch1-H358-pY_run1	6659	Phosphorylation (STY)	1	CGpYPAKR	3,x	39,x	1	1	CGYPAKR	CGpYPAKR;P61927;SKAYHLQKSTCGKCGYPAKRKRKYNWSAKAK;3;1;3,x	ph_P61927:39
sp|P46777|RL5_HUMAN	sp|P46777|RL5_HUMAN	P46777	__Other	P46777	P46777	sp|P46777|RL5_HUMAN 60S ribosomal protein L5 OS=Homo sapiens OX=9606 GN=RPL5 PE=1 SV=3	0.85069	7.92324	0.0129913	56.563	35.099	+	1	RYQVKFRRRREGKTDYYARKRLVIQDKNKYN	X;X;X;X;X;X;X;X;X;X;X;X;X;X;X;Phospho (STY);X;X;X;X;X;X;X;X;X;X;X;X;X;X;X	XXXXXXXXXXPPPPPPPPPXXXXXXXXXXXX	EGKT(0.012)DY(0.851)Y(0.137)AR	EGKT(-18.48)DY(7.92)Y(-7.92)AR	6	3	-2.4532	---	---	1602	448	30	30	1893	2553	20191112_Haura_KRAS-G12C_TMT-Batch2-Calu1-pY_run1	8127	1893	2553	20191112_Haura_KRAS-G12C_TMT-Batch2-Calu1-pY_run1	8127	1893	2553	20191112_Haura_KRAS-G12C_TMT-Batch2-Calu1-pY_run1	8127	Phosphorylation (STY)	1	EGKTDpYYAR	6>>n	30>>n	0.851	0.851	EGKTDYYAR	EGKTDpYYAR;P46777;RYQVKFRRRREGKTDYYARKRLVIQDKNKYN;6;1;6>>n	ph_P46777:30
sp|Q13671|RIN1_HUMAN	sp|Q13671|RIN1_HUMAN	Q13671	__Other	Q13671	Q13671	sp|Q13671|RIN1_HUMAN Ras and Rab interactor 1 OS=Homo sapiens OX=9606 GN=RIN1 PE=1 SV=4	0.956411	13.4011	0.00906092	58.699	47.869	---	2	SQTERLPPCQLLRRESSVGYRVPAGSGPSLP	X;X;X;X;X;X;X;X;X;X;X;X;X;X;X;Phospho (STY);X;X;X;Phospho (STY);X;X;X;X;X;X;X;X;X;X;X	XXXXXXXXXXXXXPPPPPPPPXXXXXXXXXX	RES(0.956)S(0.046)VGY(0.997)R	RES(13.4)S(-13.4)VGY(25.74)R	3	3	-2.1295	---	---	299	623	291	291	6700	9457	20191112_Haura_KRAS-G12C_TMT-Batch2-Calu1-pY_run1	6448	6701	9458	20191112_Haura_KRAS-G12C_TMT-Batch2-Calu1-pY_run2	6557	6701	9458	20191112_Haura_KRAS-G12C_TMT-Batch2-Calu1-pY_run2	6557	Phosphorylation (STY)	2	REpSSVGpYR	7,3>>n	295,291>>n	0.956	0.953	RESSVGYR	REpSSVGpYR;Q13671;SQTERLPPCQLLRRESSVGYRVPAGSGPSLP;3;2;7,3>>n	ph_Q13671:291
sp|P29317|EPHA2_HUMAN	sp|P29317|EPHA2_HUMAN	P29317	__Other	P29317	P29317	sp|P29317|EPHA2_HUMAN Ephrin type-A receptor 2 OS=Homo sapiens OX=9606 GN=EPHA2 PE=1 SV=2	0.623347	0	0.00148306	61.511	39.708	---	2	RKNQRARQSPEDVYFSKSEQLKPLKTYVDPH	X;X;X;X;X;X;X;X;X;X;X;X;X;Phospho (STY);X;Phospho (STY);X;Phospho (STY);X;X;X;X;X;X;X;Phospho (STY);X;X;X;X;X	XXXXXXXPPPPPPPPPPPPPPPPPPXXXXXX	QS(0.092)PEDVY(0.665)FS(0.623)KS(0.62)EQLKPLK	QS(-8.66)PEDVY(0.38)FS(0)KS(0)EQLKPLK	9	4	0.90652	---	---	179	398	577	577	6569	9310	20191112_Haura_KRAS-G12C_TMT-Batch2-Calu1-pY_run2	14930	6569	9310	20191112_Haura_KRAS-G12C_TMT-Batch2-Calu1-pY_run2	14930	6569	9310	20191112_Haura_KRAS-G12C_TMT-Batch2-Calu1-pY_run2	14930	Phosphorylation (STY)	2	QSPEDVpYFpSKSEQLKPLK	7,9,n	575,577,n	0.623	0.414	QSPEDVYFSKSEQLKPLK	QSPEDVpYFpSKSEQLKPLK;P29317;RKNQRARQSPEDVYFSKSEQLKPLKTYVDPH;9;2;7,9,n	ph_P29317:577
sp|P29317|EPHA2_HUMAN	sp|P29317|EPHA2_HUMAN	P29317	__Other	P29317	P29317	sp|P29317|EPHA2_HUMAN Ephrin type-A receptor 2 OS=Homo sapiens OX=9606 GN=EPHA2 PE=1 SV=2	0.923533	8.098	1.57666e-09	95.212	74.64	---	2	NQRARQSPEDVYFSKSEQLKPLKTYVDPHTY	X;X;X;X;X;X;Phospho (STY);X;X;X;X;Phospho (STY);X;X;X;Phospho (STY);X;X;X;X;X;X;X;Phospho (STY);X;X;X;X;X;Phospho (STY);Phospho (STY)	XXXXXPPPPPPPPPPPPPPPPPPPPPPPPPP	QSPEDVY(0.57)FS(0.507)KS(0.924)EQLKPLK	QS(-40.93)PEDVY(0.59)FS(-0.59)KS(8.1)EQLKPLK	11	4	1.9737	---	---	180	398	579	579	6568	9309	20191112_Haura_KRAS-G12C_TMT-Batch2-Calu1-pY_run1	14791	7057	9942	20191107_Haura_KRAS-G12C_TMT-Batch1-H358-pY_run1	12595	7057	9942	20191107_Haura_KRAS-G12C_TMT-Batch1-H358-pY_run1	12595	Phosphorylation (STY)	2	QSPEDVpYFSKpSEQLKPLK	11>>7>n	579>>575>n	0.924	0.527	QSPEDVYFSKSEQLKPLK	QSPEDVpYFSKpSEQLKPLK;P29317;NQRARQSPEDVYFSKSEQLKPLKTYVDPHTY;11;2;11>>7>n	ph_P29317:579
sp|P31431|SDC4_HUMAN	sp|P31431|SDC4_HUMAN	P31431	__Other	P31431	P31431	sp|P31431|SDC4_HUMAN Syndecan-4 OS=Homo sapiens OX=9606 GN=SDC4 PE=1 SV=2	1	101.782	4.47155e-05	144.09	102.44	+	1	LGKKPIYKKAPTNEFYA______________	X;X;X;X;X;X;X;X;X;X;X;X;X;X;X;Phospho (STY);X;X;X;X;X;X;X;X;X;X;X;X;X;X;X	XXXXXXXXPPPPPPPPPXXXXXXXXXXXXXX	APTNEFY(1)A	APT(-101.78)NEFY(101.78)A	7	2	-2.4971	---	---	1542	407	197	197	590	841	20191112_Haura_KRAS-G12C_TMT-Batch2-Calu1-pY_run1	14414	4244	6168	20191107_Haura_KRAS-G12C_TMT-Batch1-H358-pY_run2	12336	590	841	20191112_Haura_KRAS-G12C_TMT-Batch2-Calu1-pY_run1	14414	Phosphorylation (STY)	1	APTNEFpYA	7>>n	197>>n	1	1	APTNEFYA	APTNEFpYA;P31431;LGKKPIYKKAPTNEFYA______________;7;1;7>>n	ph_P31431:197
sp|Q8NFG4|FLCN_HUMAN	sp|Q8NFG4|FLCN_HUMAN	Q8NFG4	__Other	Q8NFG4	Q8NFG4	sp|Q8NFG4|FLCN_HUMAN Folliculin OS=Homo sapiens OX=9606 GN=FLCN PE=1 SV=1	1	63.6408	0.0236659	75.854	37.562	---	1	GASEEDNVKLLKFWMTGLSKTYKSHLMSTVR	X;X;X;X;X;X;X;X;X;X;X;X;X;X;X;Phospho (STY);X;X;X;X;X;X;X;X;X;X;X;X;X;X;X	XXXXXXXXXXXXPPPPPPPPXXXXXXXXXXX	FWMT(1)GLSK	FWMT(63.64)GLS(-63.64)K	4	3	3.8905	---	---	852	833	555	555	2593	3501	20191107_Haura_KRAS-G12C_TMT-Batch1-H358-pY_run2	8977	2593	3501	20191107_Haura_KRAS-G12C_TMT-Batch1-H358-pY_run2	8977	2593	3501	20191107_Haura_KRAS-G12C_TMT-Batch1-H358-pY_run2	8977	Phosphorylation (STY)	1	FWMpTGLSK	4>>n	555>>n	1	1	FWMTGLSK	FWMpTGLSK;Q8NFG4;GASEEDNVKLLKFWMTGLSKTYKSHLMSTVR;4;1;4>>n	ph_Q8NFG4:555
sp|Q9H201|EPN3_HUMAN	sp|Q9H201|EPN3_HUMAN	Q9H201	__Other	Q9H201	Q9H201	sp|Q9H201|EPN3_HUMAN Epsin-3 OS=Homo sapiens OX=9606 GN=EPN3 PE=2 SV=1	0.998819	29.2755	0.00020576	100.19	45.663	+	1	IGSGQLGFSRRYGEDYSRSRGSPSSYNSSSS	X;X;X;X;X;X;X;X;X;X;X;X;X;X;X;Phospho (STY);X;X;X;X;X;X;X;X;X;Phospho (STY);X;X;X;X;X	XXXXXXXXXXPPPPPPPPXXXXXXXXXXXXX	YGEDY(0.999)S(0.001)R	Y(-60.08)GEDY(29.28)S(-29.28)R	5	2	-1.5258	---	---	2513	985	176	176	9912	14053	20191107_Haura_KRAS-G12C_TMT-Batch1-H358-pY_run1	7729	9912	14053	20191107_Haura_KRAS-G12C_TMT-Batch1-H358-pY_run1	7729	9912	14053	20191107_Haura_KRAS-G12C_TMT-Batch1-H358-pY_run1	7729	Phosphorylation (STY)	1	YGEDpYSR	5>>n	176>>n	0.999	0.999	YGEDYSR	YGEDpYSR;Q9H201;IGSGQLGFSRRYGEDYSRSRGSPSSYNSSSS;5;1;5>>n	ph_Q9H201:176
sp|P27986|P85A_HUMAN	sp|P27986|P85A_HUMAN	P27986	__Other	P27986	P27986	sp|P27986|P85A_HUMAN Phosphatidylinositol 3-kinase regulatory subunit alpha OS=Homo sapiens OX=9606 GN=PIK3R1 PE=1 SV=2	1	52.2469	0.00322051	76.899	43.778	+	1	SRRRLEEDLKKQAAEYREIDKRMNSIKPDLI	X;X;X;X;X;X;X;X;X;X;X;X;X;X;X;Phospho (STY);X;X;X;X;X;X;X;X;X;X;X;X;X;X;X	XXXXXXXXXXPPPPPPPPPPPPXXXXXXXXX	QAAEY(1)REIDKR	QAAEY(52.25)REIDKR	5	4	0.04675	---	---	1504	393	556	556	6161	8756	20191112_Haura_KRAS-G12C_TMT-Batch2-Calu1-pY_run2	7747	4545	6547	20191112_Haura_KRAS-G12C_TMT-Batch2-Calu1-pY_run1	6315	4545	6547	20191112_Haura_KRAS-G12C_TMT-Batch2-Calu1-pY_run1	6315	Phosphorylation (STY)	1	QAAEpYREIDKR	5,x	556,x	1	1	QAAEYREIDKR	QAAEpYREIDKR;P27986;SRRRLEEDLKKQAAEYREIDKRMNSIKPDLI;5;1;5,x	ph_P27986:556
sp|Q9HCE6|ARGAL_HUMAN	sp|Q9HCE6|ARGAL_HUMAN	Q9HCE6	__Other	Q9HCE6	Q9HCE6	sp|Q9HCE6|ARGAL_HUMAN Rho guanine nucleotide exchange factor 10-like protein OS=Homo sapiens OX=9606 GN=ARHGEF10L PE=1 SV=4	1	118.177	0.000328614	118.18	104.18	+	1	ESPDAHQPGAERNLLYEDAHRAGAPRQAEDL	X;X;X;X;X;X;X;X;X;X;X;X;X;X;X;Phospho (STY);X;X;X;X;X;X;X;X;X;X;X;X;X;X;X	XXXXXXXXXXXXPPPPPPPPPXXXXXXXXXX	NLLY(1)EDAHR	NLLY(118.18)EDAHR	4	3	0.035961	---	---	2565	1010	152	152	5840	8376	20191107_Haura_KRAS-G12C_TMT-Batch1-H358-pY_run2	10477	5840	8376	20191107_Haura_KRAS-G12C_TMT-Batch1-H358-pY_run2	10477	5840	8376	20191107_Haura_KRAS-G12C_TMT-Batch1-H358-pY_run2	10477	Phosphorylation (STY)	1	NLLpYEDAHR	4,x	152,x	1	1	NLLYEDAHR	NLLpYEDAHR;Q9HCE6;ESPDAHQPGAERNLLYEDAHRAGAPRQAEDL;4;1;4,x	ph_Q9HCE6:152
sp|Q6NZI2|CAVN1_HUMAN	sp|Q6NZI2|CAVN1_HUMAN	Q6NZI2	__Other	Q6NZI2	Q6NZI2	sp|Q6NZI2|CAVN1_HUMAN Caveolae-associated protein 1 OS=Homo sapiens OX=9606 GN=CAVIN1 PE=1 SV=1	0.975636	16.0255	1.94335e-14	202.18	176.26	---	2	REKLKTSRDKLRKSFTPDHVVYARSKTAVYK	X;X;X;X;X;X;X;X;X;X;X;X;X;X;X;Phospho (STY);X;X;X;X;X;Phospho (STY);X;X;X;X;Phospho (STY);X;X;Phospho (STY);X	XXXXXXXXXXXXPPPPPPPPPPPPXXXXXXX	KS(0.024)FT(0.976)PDHVVY(1)AR	KS(-16.03)FT(16.03)PDHVVY(74.77)AR	4	3	-0.074145	---	---	823	731	302	302	4596	6602	20191112_Haura_KRAS-G12C_TMT-Batch2-Calu1-pY_run2	11404	7115	10053	20191112_Haura_KRAS-G12C_TMT-Batch2-Calu1-pY_run2	12938	7115	10053	20191112_Haura_KRAS-G12C_TMT-Batch2-Calu1-pY_run2	12938	Phosphorylation (STY)	2	KSFpTPDHVVpYAR	10,4>>n	308,302>>n	0.976	0.976	KSFTPDHVVYAR	KSFpTPDHVVpYAR;Q6NZI2;REKLKTSRDKLRKSFTPDHVVYARSKTAVYK;4;2;10,4>>n	ph_Q6NZI2:302
CON__P08727	CON__P08727	CON__P08727	__Other	CON__P08727	CON__P08727	---	0.999125	30.867	2.23272e-40	177.6	165.29	+	1	SVSSARFVSSSSSGGYGGGYGGVLTASDGLL	X;X;X;X;X;X;X;X;X;X;X;X;X;X;X;Phospho (STY);X;X;X;X;X;X;X;X;X;X;X;X;X;X;X	XXXXXXPPPPPPPPPPPPPPPPPPPPPPPPP	FVSSSSSGGY(0.999)GGGY(0.001)GGVLTASDGLLAGNEK	FVS(-78.25)S(-70.22)S(-66.33)S(-50.86)S(-43.2)GGY(30.87)GGGY(-30.87)GGVLT(-64.29)AS(-74.94)DGLLAGNEK	10	4	0.56136	---	+	964	4	61	61	2589	3496	20191112_Haura_KRAS-G12C_TMT-Batch2-Calu1-pY_run1	18587	2588	3494	20191112_Haura_KRAS-G12C_TMT-Batch2-Calu1-pY_run1	18562	2588	3494	20191112_Haura_KRAS-G12C_TMT-Batch2-Calu1-pY_run1	18562	Phosphorylation (STY)	1	FVSSSSSGGpYGGGYGGVLTASDGLLAGNEK	10>>n	61>>n	0.999	0.999	FVSSSSSGGYGGGYGGVLTASDGLLAGNEK	FVSSSSSGGpYGGGYGGVLTASDGLLAGNEK;CON__P08727;SVSSARFVSSSSSGGYGGGYGGVLTASDGLL;10;1;10>>n	ph_P08727:61
sp|Q9NZV1|CRIM1_HUMAN	sp|Q9NZV1|CRIM1_HUMAN	Q9NZV1	__Other	Q9NZV1	Q9NZV1	sp|Q9NZV1|CRIM1_HUMAN Cysteine-rich motor neuron 1 protein OS=Homo sapiens OX=9606 GN=CRIM1 PE=1 SV=1	0.999926	41.6742	0.000163545	146.81	62.334	+	1	RMLRIAEPDARFSGFYSMQKQNHLQADNFYQ	X;X;X;X;X;X;X;X;X;X;X;X;X;X;X;Phospho (STY);X;X;X;X;X;X;X;X;X;X;X;X;X;Phospho (STY);X	XXXXXXXXXXXPPPPPPPPPXXXXXXXXXXX	FSGFY(1)SMQK	FS(-41.67)GFY(41.67)S(-52.12)MQK	5	3	1.2105	---	---	2623	1055	1019	1019	2544	3446	20191112_Haura_KRAS-G12C_TMT-Batch2-Calu1-pY_run1	15775	2544	3446	20191112_Haura_KRAS-G12C_TMT-Batch2-Calu1-pY_run1	15775	2544	3446	20191112_Haura_KRAS-G12C_TMT-Batch2-Calu1-pY_run1	15775	Phosphorylation (STY)	1	FSGFpYSMQK	5>>n	1019>>n	1	1	FSGFYSMQK	FSGFpYSMQK;Q9NZV1;RMLRIAEPDARFSGFYSMQKQNHLQADNFYQ;5;1;5>>n	ph_Q9NZV1:1019
sp|P30530|UFO_HUMAN	sp|P30530|UFO_HUMAN	P30530	__Other	P30530	P30530	sp|P30530|UFO_HUMAN Tyrosine-protein kinase receptor UFO OS=Homo sapiens OX=9606 GN=AXL PE=1 SV=4	0.999967	44.8342	2.32754e-07	127.32	105.95	+	1	QGNRLKQPADCLDGLYALMSRCWELNPQDRP	X;X;X;X;X;X;X;X;X;X;X;X;X;X;X;Phospho (STY);X;X;X;X;X;X;X;X;X;X;X;X;X;X;X	XXXXPPPPPPPPPPPPPPPPPXXXXXXXXXX	LKQPADCLDGLY(1)ALMSR	LKQPADCLDGLY(44.83)ALMS(-44.83)R	12	3	0.70769	---	---	1539	406	779	779	4999	7215	20191112_Haura_KRAS-G12C_TMT-Batch2-Calu1-pY_run1	17639	4999	7215	20191112_Haura_KRAS-G12C_TMT-Batch2-Calu1-pY_run1	17639	4999	7215	20191112_Haura_KRAS-G12C_TMT-Batch2-Calu1-pY_run1	17639	Phosphorylation (STY)	1	LKQPADCLDGLpYALMSR	12>>n	779>>n	1	1	LKQPADCLDGLYALMSR	LKQPADCLDGLpYALMSR;P30530;QGNRLKQPADCLDGLYALMSRCWELNPQDRP;12;1;12>>n	ph_P30530:779
sp|P52799|EFNB2_HUMAN;sp|P98172|EFNB1_HUMAN	sp|P52799|EFNB2_HUMAN;sp|P98172|EFNB1_HUMAN	P52799;P98172	__Other	P52799;P98172	P98172	sp|P52799|EFNB2_HUMAN Ephrin-B2 OS=Homo sapiens OX=9606 GN=EFNB2 PE=1 SV=1;sp|P98172|EFNB1_HUMAN Ephrin-B1 OS=Homo sapiens OX=9606 GN=EFNB1 PE=1 SV=1	0.52587	0.902364	7.88324e-09	94.899	89.944	---	1	LRTADSVFCPHYEKVSGDYGHPVYIVQEMPP;LRTTENNYCPHYEKVSGDYGHPVYIVQEMPP	X;X;X;X;X;X;X;Phospho (STY);X;X;X;Phospho (STY);X;X;X;Phospho (STY);X;X;X;X;X;X;X;X;X;X;X;X;X;X;X	XXXXXXXXXXXXXXPPPPPPPPPPPPPPPPP	VS(0.526)GDY(0.427)GHPVY(0.047)IVQEMPPQSPANIYYKV	VS(0.9)GDY(-0.9)GHPVY(-10.5)IVQEMPPQS(-66.23)PANIY(-90)Y(-92.3)KV	2	4	2.0479	---	---	213	476;545	308;321	321	9481	13475	20191112_Haura_KRAS-G12C_TMT-Batch2-Calu1-pY_run2	17403	9481	13475	20191112_Haura_KRAS-G12C_TMT-Batch2-Calu1-pY_run2	17403	9481	13475	20191112_Haura_KRAS-G12C_TMT-Batch2-Calu1-pY_run2	17403	Phosphorylation (STY)	1	VpSGDYGHPVYIVQEMPPQSPANIYYKV	2>n	308>n;321>n	0.526	0.526	VSGDYGHPVYIVQEMPPQSPANIYYKV	VpSGDYGHPVYIVQEMPPQSPANIYYKV;P52799;P98172;LRTADSVFCPHYEKVSGDYGHPVYIVQEMPP;LRTTENNYCPHYEKVSGDYGHPVYIVQEMPP;2;1;2>n	ph_P52799;P98172:308;321
sp|Q9ULI3|HEG1_HUMAN	sp|Q9ULI3|HEG1_HUMAN	Q9ULI3	__Other	Q9ULI3	Q9ULI3	sp|Q9ULI3|HEG1_HUMAN Protein HEG homolog 1 OS=Homo sapiens OX=9606 GN=HEG1 PE=1 SV=3	0.986145	18.6138	9.26707e-51	224	190.69	+	1	HENGSTKNLLQMTDVYYSPTSVRNPELERNG	X;X;X;X;X;X;X;X;X;X;X;X;X;X;X;Phospho (STY);X;X;X;X;X;X;X;X;X;X;X;X;X;X;X	XXXXXXXPPPPPPPPPPPPPPPPPPPPPPXX	NLLQMTDVY(0.986)Y(0.014)SPTSVR	NLLQMT(-70.55)DVY(18.61)Y(-18.61)S(-35.6)PT(-48.87)S(-57.32)VR	9	3	-1.0565	---	---	2678	1087	1330	1330	5834	8370	20191112_Haura_KRAS-G12C_TMT-Batch2-Calu1-pY_run1	17744	5836	8372	20191112_Haura_KRAS-G12C_TMT-Batch2-Calu1-pY_run1	16421	5836	8372	20191112_Haura_KRAS-G12C_TMT-Batch2-Calu1-pY_run1	16421	Phosphorylation (STY)	1	NLLQMTDVpYYSPTSVR	9>>n	1330>>n	0.986	0.986	NLLQMTDVYYSPTSVR	NLLQMTDVpYYSPTSVR;Q9ULI3;HENGSTKNLLQMTDVYYSPTSVRNPELERNG;9;1;9>>n	ph_Q9ULI3:1330
sp|Q8TAF3|WDR48_HUMAN	sp|Q8TAF3|WDR48_HUMAN	Q8TAF3	__Other	Q8TAF3	Q8TAF3	sp|Q8TAF3|WDR48_HUMAN WD repeat-containing protein 48 OS=Homo sapiens OX=9606 GN=WDR48 PE=1 SV=1	0.555134	1.08725	0.00039579	67.364	58.318	---	1	TVNKWTLKGIHNFRASGDYDNDCTNPITPLC	X;X;X;X;X;X;X;X;X;X;X;X;X;X;X;Phospho (STY);X;X;X;X;X;X;X;X;X;X;X;X;X;X;X	XXXXXXXXXXXXXXPPPPPPPPPPPPPPPPP	AS(0.555)GDY(0.432)DNDCT(0.008)NPIT(0.005)PLCTQPDQVIK	AS(1.09)GDY(-1.09)DNDCT(-18.35)NPIT(-20.85)PLCT(-50.87)QPDQVIK	2	3	-0.56016	---	---	403	843	335	335	720	1021	20191107_Haura_KRAS-G12C_TMT-Batch1-H358-pY_run2	16313	721	1022	20191113_Haura_KRAS-G12C_TMT-Batch3-H1792-pY_run2	16312	721	1022	20191113_Haura_KRAS-G12C_TMT-Batch3-H1792-pY_run2	16312	Phosphorylation (STY)	1	ApSGDYDNDCTNPITPLCTQPDQVIK	2>n	335>n	0.555	0.555	ASGDYDNDCTNPITPLCTQPDQVIK	ApSGDYDNDCTNPITPLCTQPDQVIK;Q8TAF3;TVNKWTLKGIHNFRASGDYDNDCTNPITPLC;2;1;2>n	ph_Q8TAF3:335
sp|P49023|PAXI_HUMAN	sp|P49023|PAXI_HUMAN	P49023	__Other	P49023	P49023	sp|P49023|PAXI_HUMAN Paxillin OS=Homo sapiens OX=9606 GN=PXN PE=1 SV=3	0.860275	9.05984	6.98924e-11	139.11	123.82	---	2	WQPSSSRFIHQQPQSSSPVYGSSAKTSSVSN	X;X;X;X;X;X;X;X;X;X;X;X;X;X;X;Phospho (STY);X;X;X;Phospho (STY);X;X;X;X;X;X;X;X;X;X;X	XXXXXXXPPPPPPPPPPPPPPPPPPXXXXXX	FIHQQPQS(0.107)S(0.86)S(0.033)PVY(0.986)GS(0.012)S(0.002)AK	FIHQQPQS(-9.06)S(9.06)S(-14.42)PVY(19.73)GS(-19.73)S(-26.75)AK	9	3	-0.15988	---	---	208	457	84	84	2432	3304	20191112_Haura_KRAS-G12C_TMT-Batch2-Calu1-pY_run2	11960	2432	3304	20191112_Haura_KRAS-G12C_TMT-Batch2-Calu1-pY_run2	11960	2431	3303	20191112_Haura_KRAS-G12C_TMT-Batch2-Calu1-pY_run1	11869	Phosphorylation (STY)	2	FIHQQPQSpSSPVpYGSSAK	13>9>>n	88>84>>n	0.86	0.848	FIHQQPQSSSPVYGSSAK	FIHQQPQSpSSPVpYGSSAK;P49023;WQPSSSRFIHQQPQSSSPVYGSSAKTSSVSN;9;2;13>9>>n	ph_P49023:84
sp|Q8WXH5|SOCS4_HUMAN	sp|Q8WXH5|SOCS4_HUMAN	Q8WXH5	__Other	Q8WXH5	Q8WXH5	sp|Q8WXH5|SOCS4_HUMAN Suppressor of cytokine signaling 4 OS=Homo sapiens OX=9606 GN=SOCS4 PE=1 SV=1	0.994418	22.5077	0.0432366	43.808	33.05	+	1	RPKTSRSRSADRKDGYVWSGKKLSWSKKSES	X;X;X;X;X;X;X;X;X;X;X;X;X;X;X;Phospho (STY);X;X;X;X;X;X;X;X;X;X;X;X;X;X;X	XXXXXXXXXXXXXPPPPPPPPXXXXXXXXXX	DGY(0.994)VWS(0.006)GK	DGY(22.51)VWS(-22.51)GK	3	2	-0.71884	---	---	2298	868	30	30	1219	1651	20191107_Haura_KRAS-G12C_TMT-Batch1-H358-pY_run1	13219	1219	1651	20191107_Haura_KRAS-G12C_TMT-Batch1-H358-pY_run1	13219	1219	1651	20191107_Haura_KRAS-G12C_TMT-Batch1-H358-pY_run1	13219	Phosphorylation (STY)	1	DGpYVWSGK	3>>n	30>>n	0.994	0.994	DGYVWSGK	DGpYVWSGK;Q8WXH5;RPKTSRSRSADRKDGYVWSGKKLSWSKKSES;3;1;3>>n	ph_Q8WXH5:30
sp|Q96PD2|DCBD2_HUMAN	sp|Q96PD2|DCBD2_HUMAN	Q96PD2	__Other	Q96PD2	Q96PD2	sp|Q96PD2|DCBD2_HUMAN Discoidin, CUB and LCCL domain-containing protein 2 OS=Homo sapiens OX=9606 GN=DCBLD2 PE=1 SV=1	0.629941	2.31962	0.000197389	136.57	106	---	1;2	VCAWHWRNRKKKTEGTYDLPYWDRAGWWKGM	X;X;X;X;X;X;X;X;X;X;X;X;X;X;X;Phospho (STY);X;X;X;X;Phospho (STY);X;X;X;X;X;X;X;X;X;X	XXXXXXXXXXXPPPPPPPPPPPPPXXXXXXX	T(0.001)EGT(0.63)Y(0.369)DLPYWDR	T(-28.99)EGT(2.32)Y(-2.32)DLPY(-63.33)WDR	4	2	-0.0086595	---	---	878	924	564	564	8295	11711	20191113_Haura_KRAS-G12C_TMT-Batch3-H1792-pY_run1	15121	8295	11711	20191113_Haura_KRAS-G12C_TMT-Batch3-H1792-pY_run1	15121	4620	6628	20191107_Haura_KRAS-G12C_TMT-Batch1-H358-pY_run1	13484	Phosphorylation (STY)	1	TEGpTYDLPYWDR	4>n	564>n	0.63	0.63	TEGTYDLPYWDR	TEGpTYDLPYWDR;Q96PD2;VCAWHWRNRKKKTEGTYDLPYWDRAGWWKGM;4;1;4>n	ph_Q96PD2:564
sp|P29317|EPHA2_HUMAN	sp|P29317|EPHA2_HUMAN	P29317	__Other	P29317	P29317	sp|P29317|EPHA2_HUMAN Ephrin type-A receptor 2 OS=Homo sapiens OX=9606 GN=EPHA2 PE=1 SV=2	0.998345	28.2241	8.21313e-21	189.78	173.89	---	1;2	SDFGLSRVLEDDPEATYTTSGGKIPIRWTAP	X;X;X;X;X;X;X;X;X;X;X;X;X;X;X;Phospho (STY);Phospho (STY);Phospho (STY);X;X;X;X;X;X;X;X;X;X;X;X;X	XXXXXXXPPPPPPPPPPPPPPPPPPPPXXXX	VLEDDPEAT(0.998)Y(0.904)T(0.09)T(0.006)S(0.001)GGKIPIR	VLEDDPEAT(28.22)Y(10.08)T(-10.08)T(-21.67)S(-31.39)GGKIPIR	9	3	-0.383	---	---	702	398	771	771	9315	13234	20191107_Haura_KRAS-G12C_TMT-Batch1-H358-pY_run1	15529	9320	13244	20191112_Haura_KRAS-G12C_TMT-Batch2-Calu1-pY_run2	15653	9320	13244	20191112_Haura_KRAS-G12C_TMT-Batch2-Calu1-pY_run2	15653	Phosphorylation (STY)	2	VLEDDPEApTpYTTSGGKIPIR	9>10>>n	771>772>>n	0.998	0.902	VLEDDPEATYTTSGGKIPIR	VLEDDPEApTpYTTSGGKIPIR;P29317;SDFGLSRVLEDDPEATYTTSGGKIPIRWTAP;9;2;9>10>>n	ph_P29317:771
sp|Q9Y4K4|M4K5_HUMAN	sp|Q9Y4K4|M4K5_HUMAN	Q9Y4K4	__Other	Q9Y4K4	Q9Y4K4	sp|Q9Y4K4|M4K5_HUMAN Mitogen-activated protein kinase kinase kinase kinase 5 OS=Homo sapiens OX=9606 GN=MAP4K5 PE=1 SV=2	0.8856	8.90393	0.00189439	85.731	66.46	+	1	PQQDYELVQRVGSGTYGDVYKARNVHTGELA	X;X;X;X;X;X;X;X;X;X;X;X;X;X;X;Phospho (STY);X;X;X;X;X;X;X;X;X;X;X;X;X;X;X	XXXXXXXXXXPPPPPPPPPPPXXXXXXXXXX	VGSGT(0.114)Y(0.886)GDVYK	VGS(-34.82)GT(-8.9)Y(8.9)GDVY(-38.53)K	6	2	0.5684	---	---	2754	1129	31	31	9103	12816	20191113_Haura_KRAS-G12C_TMT-Batch3-H1792-pY_run1	11961	9103	12816	20191113_Haura_KRAS-G12C_TMT-Batch3-H1792-pY_run1	11961	9103	12816	20191113_Haura_KRAS-G12C_TMT-Batch3-H1792-pY_run1	11961	Phosphorylation (STY)	1	VGSGTpYGDVYK	6>>n	31>>n	0.886	0.886	VGSGTYGDVYK	VGSGTpYGDVYK;Q9Y4K4;PQQDYELVQRVGSGTYGDVYKARNVHTGELA;6;1;6>>n	ph_Q9Y4K4:31
sp|Q9NR46|SHLB2_HUMAN	sp|Q9NR46|SHLB2_HUMAN	Q9NR46	__Other	Q9NR46	Q9NR46	sp|Q9NR46|SHLB2_HUMAN Endophilin-B2 OS=Homo sapiens OX=9606 GN=SH3GLB2 PE=1 SV=1	1	56.3592	0.00182864	79.82	34.743	+	1	VLLQPNPSARVEEFLYEKLDRKVPSRVTNGE	X;X;X;X;X;X;X;X;X;X;X;X;X;X;X;Phospho (STY);X;X;X;X;X;X;X;X;X;X;X;X;X;X;X	XXXXXXXXXXPPPPPPPPPPPXXXXXXXXXX	VEEFLY(1)EKLDR	VEEFLY(56.36)EKLDR	6	3	0.77304	---	---	2587	1024	77	77	8975	12629	20191112_Haura_KRAS-G12C_TMT-Batch2-Calu1-pY_run2	17219	8974	12628	20191112_Haura_KRAS-G12C_TMT-Batch2-Calu1-pY_run1	17105	8974	12628	20191112_Haura_KRAS-G12C_TMT-Batch2-Calu1-pY_run1	17105	Phosphorylation (STY)	1	VEEFLpYEKLDR	6,x	77,x	1	1	VEEFLYEKLDR	VEEFLpYEKLDR;Q9NR46;VLLQPNPSARVEEFLYEKLDRKVPSRVTNGE;6;1;6,x	ph_Q9NR46:77
sp|Q8TF42|UBS3B_HUMAN	sp|Q8TF42|UBS3B_HUMAN	Q8TF42	__Other	Q8TF42	Q8TF42	sp|Q8TF42|UBS3B_HUMAN Ubiquitin-associated and SH3 domain-containing protein B OS=Homo sapiens OX=9606 GN=UBASH3B PE=1 SV=2	0.568923	1.20697	0.00251882	70.1	39.769	---	1	GHPSPLGMAAREELYSKVTPRRNRQQRPGTI	X;X;X;X;X;X;X;X;X;X;X;X;X;X;X;Phospho (STY);X;X;X;X;X;X;X;X;X;X;X;X;X;X;X	XXXXXXXXXXXPPPPPPPPPPXXXXXXXXXX	EELY(0.431)S(0.569)KVTPR	EELY(-1.21)S(1.21)KVT(-34.59)PR	5	3	0.83889	---	---	414	852	20	20	1818	2456	20191107_Haura_KRAS-G12C_TMT-Batch1-H358-pY_run2	11032	1818	2456	20191107_Haura_KRAS-G12C_TMT-Batch1-H358-pY_run2	11032	1818	2456	20191107_Haura_KRAS-G12C_TMT-Batch1-H358-pY_run2	11032	Phosphorylation (STY)	1	EELYpSKVTPR	5>n	20>n	0.569	0.569	EELYSKVTPR	EELYpSKVTPR;Q8TF42;GHPSPLGMAAREELYSKVTPRRNRQQRPGTI;5;1;5>n	ph_Q8TF42:20
sp|Q9Y6M7|S4A7_HUMAN	sp|Q9Y6M7|S4A7_HUMAN	Q9Y6M7	__Other	Q9Y6M7	Q9Y6M7	sp|Q9Y6M7|S4A7_HUMAN Sodium bicarbonate cotransporter 3 OS=Homo sapiens OX=9606 GN=SLC4A7 PE=1 SV=2	0.986247	18.556	5.4557e-05	92.474	77.902	---	2	HRAVYIGVHVPFSKESRRRHRHRGHKHHHRR	X;X;X;X;Phospho (STY);X;X;X;X;X;X;X;X;X;X;Phospho (STY);X;X;X;X;X;X;X;X;X;X;X;X;X;X;X	XXPPPPPPPPPPPPPPPXXXXXXXXXXXXXX	AVY(1)IGVHVPFS(0.014)KES(0.986)R	AVY(54.42)IGVHVPFS(-18.56)KES(18.56)R	14	3	0.65143	---	---	600	1136	55	55	914	1293	20191112_Haura_KRAS-G12C_TMT-Batch2-Calu1-pY_run1	15481	914	1293	20191112_Haura_KRAS-G12C_TMT-Batch2-Calu1-pY_run1	15481	913	1291	20191112_Haura_KRAS-G12C_TMT-Batch2-Calu1-pY_run1	15479	Phosphorylation (STY)	2	AVpYIGVHVPFSKEpSR	3,14>>n	44,55>>n	0.986	0.986	AVYIGVHVPFSKESR	AVpYIGVHVPFSKEpSR;Q9Y6M7;HRAVYIGVHVPFSKESRRRHRHRGHKHHHRR;14;2;3,14>>n	ph_Q9Y6M7:55
sp|Q92974|ARHG2_HUMAN	sp|Q92974|ARHG2_HUMAN	Q92974	__Other	Q92974	Q92974	sp|Q92974|ARHG2_HUMAN Rho guanine nucleotide exchange factor 2 OS=Homo sapiens OX=9606 GN=ARHGEF2 PE=1 SV=4	0.995299	23.4184	7.19224e-05	136.81	97.029	+	1	LRSKTTIRERPSSAIYPSDSFRQSLLGSRRG	X;X;X;X;X;X;X;X;X;X;X;X;X;X;X;Phospho (STY);X;X;X;X;X;X;X;X;X;X;X;X;X;X;X	XXXXXXXXPPPPPPPPPPPPPPXXXXXXXXX	ERPSSAIY(0.995)PS(0.005)DSFR	ERPS(-63.43)S(-50.9)AIY(23.42)PS(-23.42)DS(-37.87)FR	8	3	-1.0754	---	---	2321	888	125	125	2142	2894	20191112_Haura_KRAS-G12C_TMT-Batch2-Calu1-pY_run2	10525	2142	2894	20191112_Haura_KRAS-G12C_TMT-Batch2-Calu1-pY_run2	10525	2142	2894	20191112_Haura_KRAS-G12C_TMT-Batch2-Calu1-pY_run2	10525	Phosphorylation (STY)	1	ERPSSAIpYPSDSFR	8>>n	125>>n	0.995	0.995	ERPSSAIYPSDSFR	ERPSSAIpYPSDSFR;Q92974;LRSKTTIRERPSSAIYPSDSFRQSLLGSRRG;8;1;8>>n	ph_Q92974:125
sp|P11274|BCR_HUMAN	sp|P11274|BCR_HUMAN	P11274	__Other	P11274	P11274	sp|P11274|BCR_HUMAN Breakpoint cluster region protein OS=Homo sapiens OX=9606 GN=BCR PE=1 SV=2	0.821175	7.54931	0.0121715	57.59	18.442	+	1	FSSGQSSRVSPSPTTYRMFRDKSRSPSQNSQ	X;X;X;X;X;X;X;X;X;X;X;X;X;X;X;Phospho (STY);X;X;X;X;X;X;X;X;X;X;X;X;X;X;X	XXXXXXXXPPPPPPPPPXXXXXXXXXXXXXX	VSPS(0.014)PT(0.02)T(0.144)Y(0.821)R	VS(-44.96)PS(-17.54)PT(-16.14)T(-7.55)Y(7.55)R	8	2	0.029803	---	---	1371	304	360	360	9493	13490	20191112_Haura_KRAS-G12C_TMT-Batch2-Calu1-pY_run2	8819	9493	13490	20191112_Haura_KRAS-G12C_TMT-Batch2-Calu1-pY_run2	8819	9493	13490	20191112_Haura_KRAS-G12C_TMT-Batch2-Calu1-pY_run2	8819	Phosphorylation (STY)	1	VSPSPTTpYR	8>>n	360>>n	0.821	0.821	VSPSPTTYR	VSPSPTTpYR;P11274;FSSGQSSRVSPSPTTYRMFRDKSRSPSQNSQ;8;1;8>>n	ph_P11274:360
sp|P00533|EGFR_HUMAN	sp|P00533|EGFR_HUMAN	P00533	__Other	P00533	P00533	sp|P00533|EGFR_HUMAN Epidermal growth factor receptor OS=Homo sapiens OX=9606 GN=EGFR PE=1 SV=2	1	123.639	7.56106e-23	178.32	149.52	---	1	TDFGLAKLLGAEEKEYHAEGGKVPIKWMALE	X;X;X;X;X;X;X;X;X;X;X;X;X;X;X;Phospho (STY);X;X;X;X;X;X;X;X;X;X;X;X;X;X;X	XXXXXXXXXXXXXXPPPPPPPPPPPPPPPPP	EY(1)HAEGGKVPIK	EY(123.64)HAEGGKVPIK	2	3	2.0852	---	---	1240	242	869	869	2341	3178	20191113_Haura_KRAS-G12C_TMT-Batch3-H1792-pY_run2	9508	2340	3176	20191113_Haura_KRAS-G12C_TMT-Batch3-H1792-pY_run2	9504	2343	3180	20191112_Haura_KRAS-G12C_TMT-Batch2-Calu1-pY_run2	15938	Phosphorylation (STY)	1	EpYHAEGGKVPIK	2,x	869,x	1	1	EYHAEGGKVPIK	EpYHAEGGKVPIK;P00533;TDFGLAKLLGAEEKEYHAEGGKVPIKWMALE;2;1;2,x	ph_P00533:869
sp|Q9UN19|DAPP1_HUMAN	sp|Q9UN19|DAPP1_HUMAN	Q9UN19	__Other	Q9UN19	Q9UN19	sp|Q9UN19|DAPP1_HUMAN Dual adapter for phosphotyrosine and 3-phosphotyrosine and 3-phosphoinositide OS=Homo sapiens OX=9606 GN=DAPP1 PE=1 SV=1	0.999979	49.8828	2.2714e-05	158.81	126.4	+	1	VLKHPYPRKVEEPSIYESVRVHTAMQTGRTE	X;X;X;X;X;X;X;X;X;X;X;X;X;X;X;Phospho (STY);X;X;X;X;X;X;X;X;X;X;X;X;X;X;X	XXXXXXXXPPPPPPPPPPPPXXXXXXXXXXX	KVEEPSIY(1)ESVR	KVEEPS(-49.88)IY(49.88)ES(-49.88)VR	8	3	-1.1633	---	---	2682	1091	139	139	4703	6733	20191107_Haura_KRAS-G12C_TMT-Batch1-H358-pY_run1	11447	4704	6734	20191107_Haura_KRAS-G12C_TMT-Batch1-H358-pY_run2	11414	4704	6734	20191107_Haura_KRAS-G12C_TMT-Batch1-H358-pY_run2	11414	Phosphorylation (STY)	1	KVEEPSIpYESVR	8>>n	139>>n	1	1	KVEEPSIYESVR	KVEEPSIpYESVR;Q9UN19;VLKHPYPRKVEEPSIYESVRVHTAMQTGRTE;8;1;8>>n	ph_Q9UN19:139
sp|P04626|ERBB2_HUMAN	sp|P04626|ERBB2_HUMAN	P04626	__Other	P04626	P04626	sp|P04626|ERBB2_HUMAN Receptor tyrosine-protein kinase erbB-2 OS=Homo sapiens OX=9606 GN=ERBB2 PE=1 SV=1	0.566113	1.15526	0.000151744	83.968	62.165	---	1	KITDFGLARLLDIDETEYHADGGKVPIKWMA	X;X;X;X;X;X;X;X;X;X;X;X;X;X;X;Phospho (STY);X;X;X;X;X;X;X;X;X;X;X;X;X;X;X	XXXXXXXXXPPPPPPPPPPPPPPPPPPPXXX	LLDIDET(0.566)EY(0.434)HADGGKVPIK	LLDIDET(1.16)EY(-1.16)HADGGKVPIK	7	3	0.28095	---	---	653	255	875	875	5031	7274	20191113_Haura_KRAS-G12C_TMT-Batch3-H1792-pY_run1	14701	5031	7274	20191113_Haura_KRAS-G12C_TMT-Batch3-H1792-pY_run1	14701	5032	7275	20191113_Haura_KRAS-G12C_TMT-Batch3-H1792-pY_run1	14709	Phosphorylation (STY)	1	LLDIDEpTEYHADGGKVPIK	7>n	875>n	0.566	0.566	LLDIDETEYHADGGKVPIK	LLDIDEpTEYHADGGKVPIK;P04626;KITDFGLARLLDIDETEYHADGGKVPIKWMA;7;1;7>n	ph_P04626:875
sp|Q9NWQ8|PHAG1_HUMAN	sp|Q9NWQ8|PHAG1_HUMAN	Q9NWQ8	__Other	Q9NWQ8	Q9NWQ8	sp|Q9NWQ8|PHAG1_HUMAN Phosphoprotein associated with glycosphingolipid-enriched microdomains 1 OS=Homo sapiens OX=9606 GN=PAG1 PE=1 SV=2	1	92.5753	0.000152617	92.575	75.696	---	1;2	PGPQTEGKAEFAEYASVDRNKKCRQSVNVES	X;X;X;X;X;X;X;X;X;X;X;X;X;Phospho (STY);X;Phospho (STY);X;X;X;X;X;X;X;X;X;X;X;X;X;X;X	XXXXXXXXPPPPPPPPPPPPPPXXXXXXXXX	AEFAEY(1)AS(1)VDRNKK	AEFAEY(92.58)AS(92.58)VDRNKK	8	4	1.3467	---	---	540	1041	229	229	164	208	20191113_Haura_KRAS-G12C_TMT-Batch3-H1792-pY_run2	11606	164	208	20191113_Haura_KRAS-G12C_TMT-Batch3-H1792-pY_run2	11606	162	206	20191113_Haura_KRAS-G12C_TMT-Batch3-H1792-pY_run1	11539	Phosphorylation (STY)	2	AEFAEpYApSVDRNKK	6,8,x	227,229,x	1	1	AEFAEYASVDRNKK	AEFAEpYApSVDRNKK;Q9NWQ8;PGPQTEGKAEFAEYASVDRNKKCRQSVNVES;8;2;6,8,x	ph_Q9NWQ8:229
sp|P21980|TGM2_HUMAN	sp|P21980|TGM2_HUMAN	P21980	__Other	P21980	P21980	sp|P21980|TGM2_HUMAN Protein-glutamine gamma-glutamyltransferase 2 OS=Homo sapiens OX=9606 GN=TGM2 PE=1 SV=2	0.570809	1.51756	0.00660543	58.433	47.269	---	1	GWQALDPTPQEKSEGTYCCGPVPVRAIKEGD	X;X;X;X;X;X;X;X;X;X;X;X;X;X;X;Phospho (STY);X;X;X;X;X;X;X;X;X;X;X;X;X;X;X	XXXXXXXXXXXXPPPPPPPPPPPPPXXXXXX	S(0.027)EGT(0.571)Y(0.402)CCGPVPVR	S(-13.3)EGT(1.52)Y(-1.52)CCGPVPVR	4	2	0.085936	---	---	689	367	368	368	7040	9924	20191113_Haura_KRAS-G12C_TMT-Batch3-H1792-pY_run1	10535	7040	9924	20191113_Haura_KRAS-G12C_TMT-Batch3-H1792-pY_run1	10535	7040	9924	20191113_Haura_KRAS-G12C_TMT-Batch3-H1792-pY_run1	10535	Phosphorylation (STY)	1	SEGpTYCCGPVPVR	4>n	368>n	0.571	0.571	SEGTYCCGPVPVR	SEGpTYCCGPVPVR;P21980;GWQALDPTPQEKSEGTYCCGPVPVRAIKEGD;4;1;4>n	ph_P21980:368
sp|P07910|HNRPC_HUMAN	sp|P07910|HNRPC_HUMAN	P07910	__Other	P07910	P07910	sp|P07910|HNRPC_HUMAN Heterogeneous nuclear ribonucleoproteins C1/C2 OS=Homo sapiens OX=9606 GN=HNRNPC PE=1 SV=4	0.894685	9.92098	0.00125858	103.88	80.4	+	1	FDLDYDFQRDYYDRMYSYPARVPPPPPIARA	X;X;X;X;X;X;X;X;X;X;X;X;X;X;X;Phospho (STY);X;X;X;X;X;X;X;X;X;X;X;X;X;X;X	XXXXXXXXXPPPPPPPPPPPPXXXXXXXXXX	DYYDRMY(0.895)S(0.014)Y(0.091)PAR	DY(-48.43)Y(-38.49)DRMY(9.92)S(-18.04)Y(-9.92)PAR	7	3	-1.0803	---	---	1307	276	137	137	1702	2300	20191107_Haura_KRAS-G12C_TMT-Batch1-H358-pY_run1	11308	1702	2300	20191107_Haura_KRAS-G12C_TMT-Batch1-H358-pY_run1	11308	1702	2300	20191107_Haura_KRAS-G12C_TMT-Batch1-H358-pY_run1	11308	Phosphorylation (STY)	1	DYYDRMpYSYPAR	7>>n	137>>n	0.895	0.895	DYYDRMYSYPAR	DYYDRMpYSYPAR;P07910;FDLDYDFQRDYYDRMYSYPARVPPPPPIARA;7;1;7>>n	ph_P07910:137
sp|Q12965|MYO1E_HUMAN	sp|Q12965|MYO1E_HUMAN	Q12965	__Other	Q12965	Q12965	sp|Q12965|MYO1E_HUMAN Unconventional myosin-Ie OS=Homo sapiens OX=9606 GN=MYO1E PE=1 SV=2	0.999085	33.5295	6.63079e-12	130.85	113.91	+	1	KNSRPTRRNTTQNTGYSSGTQNANYPVRAAP	X;X;X;X;X;X;X;X;X;X;X;X;X;X;X;Phospho (STY);X;X;X;X;X;X;X;X;X;X;X;X;X;X;X	XXXXXXXXPPPPPPPPPPPPPPPPPPPPXXX	NTTQNTGY(0.999)SSGTQNANYPVR	NT(-61.7)T(-62.85)QNT(-37.86)GY(33.53)S(-35.18)S(-33.53)GT(-53.46)QNANY(-78.55)PVR	8	3	-1.6313	---	---	1873	602	941	941	6058	8631	20191112_Haura_KRAS-G12C_TMT-Batch2-Calu1-pY_run2	9053	6058	8631	20191112_Haura_KRAS-G12C_TMT-Batch2-Calu1-pY_run2	9053	6058	8631	20191112_Haura_KRAS-G12C_TMT-Batch2-Calu1-pY_run2	9053	Phosphorylation (STY)	1	NTTQNTGpYSSGTQNANYPVR	8>>n	941>>n	0.999	0.999	NTTQNTGYSSGTQNANYPVR	NTTQNTGpYSSGTQNANYPVR;Q12965;KNSRPTRRNTTQNTGYSSGTQNANYPVRAAP;8;1;8>>n	ph_Q12965:941
sp|P19174|PLCG1_HUMAN	sp|P19174|PLCG1_HUMAN	P19174	__Other	P19174	P19174	sp|P19174|PLCG1_HUMAN 1-phosphatidylinositol 4,5-bisphosphate phosphodiesterase gamma-1 OS=Homo sapiens OX=9606 GN=PLCG1 PE=1 SV=1	1	116.939	2.09257e-05	128.96	98.419	+	1	EPDYGALYEGRNPGFYVEANPMPTFKCAVKA	X;X;X;Phospho (STY);X;X;X;X;X;X;X;X;X;X;X;Phospho (STY);X;X;X;X;X;X;X;X;X;X;X;X;X;X;X	XXXXXXXXXXXPPPPPPPPPPPPPPPXXXXX	NPGFY(1)VEANPMPTFK	NPGFY(116.94)VEANPMPT(-116.94)FK	5	3	0.76573	---	---	1442	353	783	783	5942	8499	20191112_Haura_KRAS-G12C_TMT-Batch2-Calu1-pY_run1	17676	5942	8499	20191112_Haura_KRAS-G12C_TMT-Batch2-Calu1-pY_run1	17676	5942	8499	20191112_Haura_KRAS-G12C_TMT-Batch2-Calu1-pY_run1	17676	Phosphorylation (STY)	1	NPGFpYVEANPMPTFK	5>>n	783>>n	1	1	NPGFYVEANPMPTFK	NPGFpYVEANPMPTFK;P19174;EPDYGALYEGRNPGFYVEANPMPTFKCAVKA;5;1;5>>n	ph_P19174:783
sp|Q13131|AAPK1_HUMAN	sp|Q13131|AAPK1_HUMAN	Q13131	__Other	Q13131	Q13131	sp|Q13131|AAPK1_HUMAN 5'-AMP-activated protein kinase catalytic subunit alpha-1 OS=Homo sapiens OX=9606 GN=PRKAA1 PE=1 SV=4	0.998865	31.5429	0.00791217	96.89	67.08	---	2	ITEAKSGTATPQRSGSVSNYRSCQRSDSDAE	X;X;X;X;X;X;X;X;X;X;X;X;X;X;X;Phospho (STY);X;X;X;Phospho (STY);X;X;X;X;X;X;X;X;X;X;X	XXXXXXXXXXXXXPPPPPPPPXXXXXXXXXX	S(0.001)GS(0.999)VS(0.001)NY(0.999)R	S(-31.54)GS(31.54)VS(-32.59)NY(32.59)R	3	2	-0.3238	---	---	281	605	496	496	7204	10166	20191112_Haura_KRAS-G12C_TMT-Batch2-Calu1-pY_run2	7798	7204	10166	20191112_Haura_KRAS-G12C_TMT-Batch2-Calu1-pY_run2	7798	7204	10166	20191112_Haura_KRAS-G12C_TMT-Batch2-Calu1-pY_run2	7798	Phosphorylation (STY)	2	SGpSVSNpYR	7,3>>n	500,496>>n	0.999	0.998	SGSVSNYR	SGpSVSNpYR;Q13131;ITEAKSGTATPQRSGSVSNYRSCQRSDSDAE;3;2;7,3>>n	ph_Q13131:496
sp|P52799|EFNB2_HUMAN	sp|P52799|EFNB2_HUMAN	P52799	__Other	P52799	P52799	sp|P52799|EFNB2_HUMAN Ephrin-B2 OS=Homo sapiens OX=9606 GN=EFNB2 PE=1 SV=1	1	94.4998	0.0011446	121.04	92.714	+	1	IIIPLRTADSVFCPHYEKVSGDYGHPVYIVQ	X;X;X;X;X;X;X;X;X;X;X;X;X;X;X;Phospho (STY);X;X;X;Phospho (STY);X;X;Phospho (STY);X;X;X;X;X;X;X;X	XXXXXXPPPPPPPPPPPPXXXXXXXXXXXXX	TADSVFCPHY(1)EK	T(-108.16)ADS(-94.5)VFCPHY(94.5)EK	10	3	0.35323	---	---	1643	476	304	304	8213	11599	20191107_Haura_KRAS-G12C_TMT-Batch1-H358-pY_run2	11811	8213	11599	20191107_Haura_KRAS-G12C_TMT-Batch1-H358-pY_run2	11811	8213	11599	20191107_Haura_KRAS-G12C_TMT-Batch1-H358-pY_run2	11811	Phosphorylation (STY)	1	TADSVFCPHpYEK	10>>n	304>>n	1	1	TADSVFCPHYEK	TADSVFCPHpYEK;P52799;IIIPLRTADSVFCPHYEKVSGDYGHPVYIVQ;10;1;10>>n	ph_P52799:304
sp|Q8N4X5|AF1L2_HUMAN	sp|Q8N4X5|AF1L2_HUMAN	Q8N4X5	__Other	Q8N4X5	Q8N4X5	sp|Q8N4X5|AF1L2_HUMAN Actin filament-associated protein 1-like 2 OS=Homo sapiens OX=9606 GN=AFAP1L2 PE=1 SV=1	0.99965	34.5608	0.000221072	130.07	100.74	+	1	TPVADDPNERESDRVYLDLTPVKSFLHGPSS	X;X;X;X;X;X;X;X;X;X;X;X;X;X;X;Phospho (STY);X;X;X;X;X;X;X;X;X;X;X;X;X;X;X	XXXXXXXXXXPPPPPPPPPPPPPXXXXXXXX	ESDRVY(1)LDLTPVK	ES(-34.56)DRVY(34.56)LDLT(-67.93)PVK	6	3	1.2196	---	---	2209	816	537	537	2157	2910	20191112_Haura_KRAS-G12C_TMT-Batch2-Calu1-pY_run1	14595	2157	2910	20191112_Haura_KRAS-G12C_TMT-Batch2-Calu1-pY_run1	14595	2157	2910	20191112_Haura_KRAS-G12C_TMT-Batch2-Calu1-pY_run1	14595	Phosphorylation (STY)	1	ESDRVpYLDLTPVK	6>>n	537>>n	1	1	ESDRVYLDLTPVK	ESDRVpYLDLTPVK;Q8N4X5;TPVADDPNERESDRVYLDLTPVKSFLHGPSS;6;1;6>>n	ph_Q8N4X5:537
sp|O43520|AT8B1_HUMAN	sp|O43520|AT8B1_HUMAN	O43520	__Other	O43520	O43520	sp|O43520|AT8B1_HUMAN Phospholipid-transporting ATPase IC OS=Homo sapiens OX=9606 GN=ATP8B1 PE=1 SV=3	0.999999	60.2161	0.00238175	139.86	123.66	---	2	QRRQQVFRRGVSTRRSAYAFSHQRGYADLIS	X;X;X;X;X;X;X;X;X;X;X;X;X;X;X;Phospho (STY);X;Phospho (STY);X;X;X;X;X;X;X;X;X;X;X;X;X	XXXXXXXXXXXXXXXPPPPPPPPPXXXXXXX	S(1)AY(1)AFSHQR	S(60.22)AY(54.01)AFS(-54.01)HQR	1	3	-1.8647	---	---	62	165	1207	1207	6896	9719	20191112_Haura_KRAS-G12C_TMT-Batch2-Calu1-pY_run1	9034	6897	9720	20191112_Haura_KRAS-G12C_TMT-Batch2-Calu1-pY_run2	9139	6897	9720	20191112_Haura_KRAS-G12C_TMT-Batch2-Calu1-pY_run2	9139	Phosphorylation (STY)	2	pSApYAFSHQR	1,3>>n	1207,1209>>n	1	1	SAYAFSHQR	pSApYAFSHQR;O43520;QRRQQVFRRGVSTRRSAYAFSHQRGYADLIS;1;2;1,3>>n	ph_O43520:1207
sp|P20936|RASA1_HUMAN	sp|P20936|RASA1_HUMAN	P20936	__Other	P20936	P20936	sp|P20936|RASA1_HUMAN Ras GTPase-activating protein 1 OS=Homo sapiens OX=9606 GN=RASA1 PE=1 SV=1	1	87.2981	2.16145e-06	186.09	79.674	+	1;2	DQEQVLNDTVDGKEIYNTIRRKTKDAFYKNI	X;X;X;X;X;X;X;X;X;X;X;X;X;X;X;Phospho (STY);X;Phospho (STY);X;X;X;X;X;X;X;X;X;X;X;X;X	XXXXXXXXXXXXXPPPPPPPPXXXXXXXXXX	EIY(1)NT(1)IRR	EIY(87.3)NT(87.3)IRR	3	3	-1.1565	---	---	1451	361	460	460	1970	2655	20191112_Haura_KRAS-G12C_TMT-Batch2-Calu1-pY_run2	9280	1953	2626	20191107_Haura_KRAS-G12C_TMT-Batch1-H358-pY_run1	11090	1959	2638	20191107_Haura_KRAS-G12C_TMT-Batch1-H358-pY_run1	9136	Phosphorylation (STY)	2	EIpYNpTIRR	3,5,x	460,462,x	1	1	EIYNTIRR	EIpYNpTIRR;P20936;DQEQVLNDTVDGKEIYNTIRRKTKDAFYKNI;3;2;3,5,x	ph_P20936:460
sp|Q96QU6|1A1L1_HUMAN	sp|Q96QU6|1A1L1_HUMAN	Q96QU6	__Other	Q96QU6	Q96QU6	sp|Q96QU6|1A1L1_HUMAN 1-aminocyclopropane-1-carboxylate synthase-like protein 1 OS=Homo sapiens OX=9606 GN=ACCS PE=1 SV=1	0.529785	0	0.0168175	45.257	11.257	---	2	WRGHLFLREEVAKFLSFYCKSPVPLRPENVV	X;X;X;X;X;X;X;X;X;X;X;X;X;X;X;Phospho (STY);X;Phospho (STY);X;X;X;X;X;X;X;X;X;X;X;X;X	XXXXXXXXXXXXXPPPPPPPPPPPPPXXXXX	FLS(0.53)FY(0.94)CKS(0.53)PVPLR	FLS(0)FY(8.97)CKS(0)PVPLR	3	4	1.4058	---	---	467	930	150	150	2504	3395	20191112_Haura_KRAS-G12C_TMT-Batch2-Calu1-pY_run2	13835	2504	3395	20191112_Haura_KRAS-G12C_TMT-Batch2-Calu1-pY_run2	13835	2504	3395	20191112_Haura_KRAS-G12C_TMT-Batch2-Calu1-pY_run2	13835	Phosphorylation (STY)	2	FLpSFpYCKSPVPLR	5>>3,n	152>>150,n	0.53	0.498	FLSFYCKSPVPLR	FLpSFpYCKSPVPLR;Q96QU6;WRGHLFLREEVAKFLSFYCKSPVPLRPENVV;3;2;5>>3,n	ph_Q96QU6:150
sp|Q15417|CNN3_HUMAN	sp|Q15417|CNN3_HUMAN	Q15417	__Other	Q15417	Q15417	sp|Q15417|CNN3_HUMAN Calponin-3 OS=Homo sapiens OX=9606 GN=CNN3 PE=1 SV=1	0.502255	0.69417	0.0153272	42.743	23.963	---	1	GLQMGTNKCASQAGMTAYGTRRHLYDPKMQT	X;X;X;X;X;X;X;X;X;X;X;X;X;X;X;Phospho (STY);X;X;X;X;X;X;X;X;X;X;X;X;X;X;X	XXXXXXXXPPPPPPPPPPPPPPXXXXXXXXX	CAS(0.002)QAGMT(0.502)AY(0.428)GT(0.068)RR	CAS(-25.03)QAGMT(0.69)AY(-0.69)GT(-8.68)RR	8	2	-0.0059672	---	---	801	666	180	180	996	1390	20191112_Haura_KRAS-G12C_TMT-Batch2-Calu1-pY_run1	7126	998	1394	20191112_Haura_KRAS-G12C_TMT-Batch2-Calu1-pY_run2	7194	998	1394	20191112_Haura_KRAS-G12C_TMT-Batch2-Calu1-pY_run2	7194	Phosphorylation (STY)	1	CASQAGMpTAYGTRR	8>n	180>n	0.502	0.502	CASQAGMTAYGTRR	CASQAGMpTAYGTRR;Q15417;GLQMGTNKCASQAGMTAYGTRRHLYDPKMQT;8;1;8>n	ph_Q15417:180
sp|O75886|STAM2_HUMAN	sp|O75886|STAM2_HUMAN	O75886	__Other	O75886	O75886	sp|O75886|STAM2_HUMAN Signal transducing adapter molecule 2 OS=Homo sapiens OX=9606 GN=STAM2 PE=1 SV=1	0.532299	1.06099	0.0201032	73.067	55.202	---	1	ALELYNKLVNEAPVYSVYSKLHPPAHYPPAS	X;X;X;X;X;X;X;X;X;X;X;X;X;X;X;Phospho (STY);X;X;X;X;X;X;X;X;X;X;X;X;X;X;X	XXXXXXXPPPPPPPPPPPPPXXXXXXXXXXX	LVNEAPVY(0.417)S(0.532)VY(0.045)S(0.006)K	LVNEAPVY(-1.06)S(1.06)VY(-10.76)S(-19.38)K	9	2	0.79475	---	---	87	208	372	372	5338	7724	20191107_Haura_KRAS-G12C_TMT-Batch1-H358-pY_run1	15622	5338	7724	20191107_Haura_KRAS-G12C_TMT-Batch1-H358-pY_run1	15622	5338	7724	20191107_Haura_KRAS-G12C_TMT-Batch1-H358-pY_run1	15622	Phosphorylation (STY)	1	LVNEAPVYpSVYSK	9>n	372>n	0.532	0.532	LVNEAPVYSVYSK	LVNEAPVYpSVYSK;O75886;ALELYNKLVNEAPVYSVYSKLHPPAHYPPAS;9;1;9>n	ph_O75886:372
sp|P25116|PAR1_HUMAN	sp|P25116|PAR1_HUMAN	P25116	__Other	P25116	P25116	sp|P25116|PAR1_HUMAN Proteinase-activated receptor 1 OS=Homo sapiens OX=9606 GN=F2R PE=1 SV=2	1	125.112	2.0482e-19	192.65	176.83	+	1;2	ASKMDTCSSNLNNSIYKKLLT__________	X;X;X;Oxidation (M);X;X;X;X;X;X;X;X;X;Phospho (STY);X;Phospho (STY);X;X;X;X;X;X;X;X;X;X;X;X;X;X;X	XXXPPPPPPPPPPPPPPPXXXXXXXXXXXXX	MDTCSSNLNNS(1)IY(1)KK	MDT(-130.09)CS(-116.83)S(-109.34)NLNNS(109.34)IY(125.11)KK	13	4	-0.064849	---	---	1488	383	420	420	5480	7891	20191113_Haura_KRAS-G12C_TMT-Batch3-H1792-pY_run1	12252	5469	7877	20191112_Haura_KRAS-G12C_TMT-Batch2-Calu1-pY_run2	11815	5469	7877	20191112_Haura_KRAS-G12C_TMT-Batch2-Calu1-pY_run2	11815	Phosphorylation (STY)	2	MDTCSSNLNNpSIpYKK	13,11>>n	420,418>>n	1	1	MDTCSSNLNNSIYKK	MDTCSSNLNNpSIpYKK;P25116;ASKMDTCSSNLNNSIYKKLLT__________;13;2;13,11>>n	ph_P25116:420
sp|P29317|EPHA2_HUMAN	sp|P29317|EPHA2_HUMAN	P29317	__Other	P29317	P29317	sp|P29317|EPHA2_HUMAN Ephrin type-A receptor 2 OS=Homo sapiens OX=9606 GN=EPHA2 PE=1 SV=2	0.998358	27.8395	6.81661e-125	304.8	270.52	+	1;2	SEQLKPLKTYVDPHTYEDPNQAVLKFTTEIH	Phospho (STY);X;X;X;X;X;X;X;Phospho (STY);X;X;X;X;X;X;Phospho (STY);X;X;X;X;X;X;X;X;X;X;X;X;X;X;X	PPPPPPPPPPPPPPPPPPPPPPPPPXXXXXX	TYVDPHT(0.002)Y(0.998)EDPNQAVLK	T(-113.98)Y(-115.36)VDPHT(-27.84)Y(27.84)EDPNQAVLK	8	3	0.27999	---	---	1514	398	594	594	8854	12444	20191112_Haura_KRAS-G12C_TMT-Batch2-Calu1-pY_run1	12703	8851	12435	20191107_Haura_KRAS-G12C_TMT-Batch1-H358-pY_run2	12798	8851	12435	20191107_Haura_KRAS-G12C_TMT-Batch1-H358-pY_run2	12798	Phosphorylation (STY)	1	TYVDPHTpYEDPNQAVLK	8>>n	594>>n	0.998	0.998	TYVDPHTYEDPNQAVLK	TYVDPHTpYEDPNQAVLK;P29317;SEQLKPLKTYVDPHTYEDPNQAVLKFTTEIH;8;1;8>>n	ph_P29317:594
sp|P08581|MET_HUMAN	sp|P08581|MET_HUMAN	P08581	__Other	P08581	P08581	sp|P08581|MET_HUMAN Hepatocyte growth factor receptor OS=Homo sapiens OX=9606 GN=MET PE=1 SV=4	0.902598	9.48698	9.97107e-08	164.81	128.42	---	1;2	VADFGLARDMYDKEYYSVHNKTGAKLPVKWM	X;X;X;X;X;X;X;X;X;X;X;X;X;X;Phospho (STY);Phospho (STY);X;X;X;X;X;X;X;X;X;X;X;X;X;X;X	XXXXXXXXPPPPPPPPPPPPPXXXXXXXXXX	DMY(0.013)DKEY(0.903)Y(0.903)S(0.182)VHNK	DMY(-20.99)DKEY(9.49)Y(9.49)S(-9.49)VHNK	8	3	3.3237	---	---	1335	283	1235	1235	1428	1952	20191107_Haura_KRAS-G12C_TMT-Batch1-H358-pY_run1	11573	1410	1922	20191112_Haura_KRAS-G12C_TMT-Batch2-Calu1-pY_run2	11022	1470	2037	20191112_Haura_KRAS-G12C_TMT-Batch2-Calu1-pY_run2	9628	Phosphorylation (STY)	2	DMYDKEpYpYSVHNK	7,8>>n	1234,1235>>n	0.903	0.815	DMYDKEYYSVHNK	DMYDKEpYpYSVHNK;P08581;VADFGLARDMYDKEYYSVHNKTGAKLPVKWM;8;2;7,8>>n	ph_P08581:1235
sp|O43852|CALU_HUMAN	sp|O43852|CALU_HUMAN	O43852	__Other	O43852	O43852	sp|O43852|CALU_HUMAN Calumenin OS=Homo sapiens OX=9606 GN=CALU PE=1 SV=2	1	91.318	0.000137602	136.8	93.55	+	1	DELKDWIKFAQKRWIYEDVERQWKGHDLNED	X;X;X;X;X;X;X;X;X;X;X;X;X;X;X;Phospho (STY);X;X;X;X;X;X;X;X;X;X;X;X;X;X;X	XXXXXXXXXXXXXPPPPPPPPXXXXXXXXXX	WIY(1)EDVER	WIY(91.32)EDVER	3	2	-0.18474	---	---	1135	177	106	106	9718	13831	20191113_Haura_KRAS-G12C_TMT-Batch3-H1792-pY_run2	14752	9715	13827	20191112_Haura_KRAS-G12C_TMT-Batch2-Calu1-pY_run1	14756	9714	13825	20191107_Haura_KRAS-G12C_TMT-Batch1-H358-pY_run2	14777	Phosphorylation (STY)	1	WIpYEDVER	3,x	106,x	1	1	WIYEDVER	WIpYEDVER;O43852;DELKDWIKFAQKRWIYEDVERQWKGHDLNED;3;1;3,x	ph_O43852:106
sp|P46939|UTRO_HUMAN	sp|P46939|UTRO_HUMAN	P46939	__Other	P46939	P46939	sp|P46939|UTRO_HUMAN Utrophin OS=Homo sapiens OX=9606 GN=UTRN PE=1 SV=2	0.999988	49.2986	0.000389183	160.11	69.12	+	1	SPQLFHDDTHSRIEQYATRLAQMERTNGSFL	X;X;X;X;X;X;X;X;X;X;X;X;X;X;X;Phospho (STY);X;X;X;X;X;X;X;X;X;X;X;X;X;X;X	XXXXXXXXXXXXPPPPPPPXXXXXXXXXXXX	IEQY(1)ATR	IEQY(49.3)AT(-49.3)R	4	2	0.69619	---	---	1616	451	3197	3197	3918	5502	20191112_Haura_KRAS-G12C_TMT-Batch2-Calu1-pY_run2	9472	3918	5502	20191112_Haura_KRAS-G12C_TMT-Batch2-Calu1-pY_run2	9472	3916	5500	20191107_Haura_KRAS-G12C_TMT-Batch1-H358-pY_run2	9555	Phosphorylation (STY)	1	IEQpYATR	4>>n	3197>>n	1	1	IEQYATR	IEQpYATR;P46939;SPQLFHDDTHSRIEQYATRLAQMERTNGSFL;4;1;4>>n	ph_P46939:3197
sp|Q96RT1|ERBIN_HUMAN	sp|Q96RT1|ERBIN_HUMAN	Q96RT1	__Other	Q96RT1	Q96RT1	sp|Q96RT1|ERBIN_HUMAN Erbin OS=Homo sapiens OX=9606 GN=ERBIN PE=1 SV=2	1	65.3503	1.09057e-10	192.3	155.87	+	1	NMNFSNHNNVRANTAYHLHQRLGPARHGEMW	X;X;X;X;X;X;X;X;X;X;X;X;X;X;X;Phospho (STY);X;X;X;X;X;X;X;X;X;X;X;X;X;X;X	XXXXXXXXXXXPPPPPPPPPPXXXXXXXXXX	ANTAY(1)HLHQR	ANT(-65.35)AY(65.35)HLHQR	5	3	-0.5082	---	---	2395	932	1042	1042	546	775	20191112_Haura_KRAS-G12C_TMT-Batch2-Calu1-pY_run2	5497	546	775	20191112_Haura_KRAS-G12C_TMT-Batch2-Calu1-pY_run2	5497	546	775	20191112_Haura_KRAS-G12C_TMT-Batch2-Calu1-pY_run2	5497	Phosphorylation (STY)	1	ANTApYHLHQR	5>>n	1042>>n	1	1	ANTAYHLHQR	ANTApYHLHQR;Q96RT1;NMNFSNHNNVRANTAYHLHQRLGPARHGEMW;5;1;5>>n	ph_Q96RT1:1042
sp|P06241|FYN_HUMAN;sp|P07947|YES_HUMAN;sp|P12931|SRC_HUMAN	sp|P06241|FYN_HUMAN;sp|P07947|YES_HUMAN;sp|P12931|SRC_HUMAN	P06241;P07947;P12931	__Other	P06241;P07947;P12931	P07947	sp|P06241|FYN_HUMAN Tyrosine-protein kinase Fyn OS=Homo sapiens OX=9606 GN=FYN PE=1 SV=3;sp|P07947|YES_HUMAN Tyrosine-protein kinase Yes OS=Homo sapiens OX=9606 GN=YES1 PE=1 SV=3;sp|P12931|SRC_HUMAN Proto-oncogene tyrosine-protein kinase Src OS=Homo sapien	1	171.726	1.11247e-26	230.24	93.102	+	1	GAKFPIKWTAPEAALYGRFTIKSDVWSFGIL	X;X;X;X;X;X;X;X;X;X;X;X;X;X;X;Phospho (STY);X;X;X;X;X;X;X;X;X;X;X;X;X;X;X	XXXPPPPPPPPPPPPPPPXXXXXXXXXXXXX	WTAPEAALY(1)GR	WT(-171.73)APEAALY(171.73)GR	9	2	-1.3688	---	---	1278	266;277;313	440;446;439	446	9745	13861	20191112_Haura_KRAS-G12C_TMT-Batch2-Calu1-pY_run1	14867	9745	13861	20191112_Haura_KRAS-G12C_TMT-Batch2-Calu1-pY_run1	14867	9745	13861	20191112_Haura_KRAS-G12C_TMT-Batch2-Calu1-pY_run1	14867	Phosphorylation (STY)	1	WTAPEAALpYGR	9>>n	440>>n;446>>n;439>>n	1	1	WTAPEAALYGR	WTAPEAALpYGR;P06241;P07947;P12931;GAKFPIKWTAPEAALYGRFTIKSDVWSFGIL;9;1;9>>n	ph_P06241;P07947;P12931:440;446;439
sp|P08581|MET_HUMAN	sp|P08581|MET_HUMAN	P08581	__Other	P08581	P08581	sp|P08581|MET_HUMAN Hepatocyte growth factor receptor OS=Homo sapiens OX=9606 GN=MET PE=1 SV=4	0.999557	32.0452	9.97107e-08	124.92	109.66	---	1;2	ADFGLARDMYDKEYYSVHNKTGAKLPVKWMA	X;X;X;X;X;X;X;X;Oxidation (M);X;X;X;X;Phospho (STY);X;Phospho (STY);X;X;X;X;X;X;X;X;X;X;X;X;X;X;X	XXXXXXXPPPPPPPPPPPPPPPPPXXXXXXX	DMY(0.015)DKEY(0.493)Y(0.493)S(1)VHNK	DMY(-15.3)DKEY(0)Y(0)S(32.05)VHNK	9	3	1.1749	---	---	138	283	1236	1236	1435	1969	20191112_Haura_KRAS-G12C_TMT-Batch2-Calu1-pY_run1	9343	1470	2037	20191112_Haura_KRAS-G12C_TMT-Batch2-Calu1-pY_run2	9628	1470	2037	20191112_Haura_KRAS-G12C_TMT-Batch2-Calu1-pY_run2	9628	Phosphorylation (STY)	2	DMYDKEpYYpSVHNK	9>>7,n	1236>>1234,n	1	0.493	DMYDKEYYSVHNK	DMYDKEpYYpSVHNK;P08581;ADFGLARDMYDKEYYSVHNKTGAKLPVKWMA;9;2;9>>7,n	ph_P08581:1236
sp|Q05397|FAK1_HUMAN	sp|Q05397|FAK1_HUMAN	Q05397	__Other	Q05397	Q05397	sp|Q05397|FAK1_HUMAN Focal adhesion kinase 1 OS=Homo sapiens OX=9606 GN=PTK2 PE=1 SV=2	1	74.4979	5.40843e-45	179.41	161.91	---	1	REDGSLQGPIGNQHIYQPVGKPDPAAPPKKP	X;X;X;X;X;X;X;X;X;X;X;X;X;X;X;Phospho (STY);X;X;X;X;X;X;X;X;X;X;X;X;X;X;X	PPPPPPPPPPPPPPPPPPPPPPPPPPPPPXX	GSIDREDGSLQGPIGNQHIY(1)QPVGKPDPAAPPK	GS(-102.14)IDREDGS(-74.5)LQGPIGNQHIY(74.5)QPVGKPDPAAPPK	20	5	0.81463	---	---	1798	567	861	861	3179	4378	20191112_Haura_KRAS-G12C_TMT-Batch2-Calu1-pY_run2	12360	3179	4378	20191112_Haura_KRAS-G12C_TMT-Batch2-Calu1-pY_run2	12360	3179	4378	20191112_Haura_KRAS-G12C_TMT-Batch2-Calu1-pY_run2	12360	Phosphorylation (STY)	1	GSIDREDGSLQGPIGNQHIpYQPVGKPDPAAPPK	20>>n	861>>n	1	1	GSIDREDGSLQGPIGNQHIYQPVGKPDPAAPPK	GSIDREDGSLQGPIGNQHIpYQPVGKPDPAAPPK;Q05397;REDGSLQGPIGNQHIYQPVGKPDPAAPPKKP;20;1;20>>n	ph_Q05397:861
sp|Q96PD2|DCBD2_HUMAN	sp|Q96PD2|DCBD2_HUMAN	Q96PD2	__Other	Q96PD2	Q96PD2	sp|Q96PD2|DCBD2_HUMAN Discoidin, CUB and LCCL domain-containing protein 2 OS=Homo sapiens OX=9606 GN=DCBLD2 PE=1 SV=1	1	85.2244	3.10485e-71	237.58	223.51	+	1	PKAGKPGLPAPDELVYQVPQSTQEVSGAGRD	X;X;X;X;X;X;X;X;X;X;X;X;X;X;X;Phospho (STY);X;X;X;X;X;X;X;X;X;X;X;X;X;X;X	XXPPPPPPPPPPPPPPPPPPPPPPPPPPPPP	AGKPGLPAPDELVY(1)QVPQSTQEVSGAGR	AGKPGLPAPDELVY(85.22)QVPQS(-85.22)T(-90.65)QEVS(-123.46)GAGR	14	4	-0.60093	---	---	2378	924	750	750	269	420	20191113_Haura_KRAS-G12C_TMT-Batch3-H1792-pY_run2	15400	266	413	20191112_Haura_KRAS-G12C_TMT-Batch2-Calu1-pY_run2	15527	266	413	20191112_Haura_KRAS-G12C_TMT-Batch2-Calu1-pY_run2	15527	Phosphorylation (STY)	1	AGKPGLPAPDELVpYQVPQSTQEVSGAGR	14>>n	750>>n	1	1	AGKPGLPAPDELVYQVPQSTQEVSGAGR	AGKPGLPAPDELVpYQVPQSTQEVSGAGR;Q96PD2;PKAGKPGLPAPDELVYQVPQSTQEVSGAGRD;14;1;14>>n	ph_Q96PD2:750
sp|Q96RT1|ERBIN_HUMAN	sp|Q96RT1|ERBIN_HUMAN	Q96RT1	__Other	Q96RT1	Q96RT1	sp|Q96RT1|ERBIN_HUMAN Erbin OS=Homo sapiens OX=9606 GN=ERBIN PE=1 SV=2	0.999831	37.7258	6.66701e-05	159.09	125.09	+	1;2	PPQLLPRSESTENQSYAKHSANMNFSNHNNV	X;X;X;X;X;X;X;Phospho (STY);X;X;X;X;X;X;X;Phospho (STY);X;X;X;X;X;X;X;X;X;X;X;X;X;X;X	XXXXXXXPPPPPPPPPPPXXXXXXXXXXXXX	SESTENQSY(1)AK	S(-123.97)ES(-116.51)T(-110.56)ENQS(-37.73)Y(37.73)AK	9	3	1.7486	---	---	2405	932	1021	1021	7075	9964	20191112_Haura_KRAS-G12C_TMT-Batch2-Calu1-pY_run2	7611	7075	9964	20191112_Haura_KRAS-G12C_TMT-Batch2-Calu1-pY_run2	7611	7075	9964	20191112_Haura_KRAS-G12C_TMT-Batch2-Calu1-pY_run2	7611	Phosphorylation (STY)	1	SESTENQSpYAK	9>>n	1021>>n	1	1	SESTENQSYAK	SESTENQSpYAK;Q96RT1;PPQLLPRSESTENQSYAKHSANMNFSNHNNV;9;1;9>>n	ph_Q96RT1:1021
sp|P29317|EPHA2_HUMAN	sp|P29317|EPHA2_HUMAN	P29317	__Other	P29317	P29317	sp|P29317|EPHA2_HUMAN Ephrin type-A receptor 2 OS=Homo sapiens OX=9606 GN=EPHA2 PE=1 SV=2	0.599865	1.76032	1.56646e-09	161.84	136.52	---	1;2	KSEQLKPLKTYVDPHTYEDPNQAVLKFTTEI	X;Phospho (STY);X;X;X;X;X;X;X;Phospho (STY);X;X;X;X;X;Phospho (STY);X;X;X;X;X;X;X;X;X;X;X;X;X;X;X	XPPPPPPPPPPPPPPPPPPPPPPPPPXXXXX	TYVDPHT(0.6)Y(0.4)EDPNQAVLK	T(-38.15)Y(-38.82)VDPHT(1.76)Y(-1.76)EDPNQAVLK	7	4	2.2756	---	---	701	398	593	593	8855	12448	20191112_Haura_KRAS-G12C_TMT-Batch2-Calu1-pY_run1	12729	8867	12471	20191112_Haura_KRAS-G12C_TMT-Batch2-Calu1-pY_run1	13424	8867	12471	20191112_Haura_KRAS-G12C_TMT-Batch2-Calu1-pY_run1	13424	Phosphorylation (STY)	1	TYVDPHpTYEDPNQAVLK	7>n	593>n	0.6	0.6	TYVDPHTYEDPNQAVLK	TYVDPHpTYEDPNQAVLK;P29317;KSEQLKPLKTYVDPHTYEDPNQAVLKFTTEI;7;1;7>n	ph_P29317:593
sp|Q9Y490|TLN1_HUMAN	sp|Q9Y490|TLN1_HUMAN	Q9Y490	__Other	Q9Y490	Q9Y490	sp|Q9Y490|TLN1_HUMAN Talin-1 OS=Homo sapiens OX=9606 GN=TLN1 PE=1 SV=3	1	153.01	9.75511e-09	180.44	140.09	+	1	EDSVSPKKSTVLQQQYNRVGKVEHGSVALPA	X;X;X;X;X;X;X;X;X;X;X;X;X;X;X;Phospho (STY);X;X;X;X;X;X;X;X;X;X;X;X;X;X;X	XXXXXXXPPPPPPPPPPPXXXXXXXXXXXXX	STVLQQQY(1)NR	S(-158.41)T(-153.01)VLQQQY(153.01)NR	8	2	-0.63567	---	---	2738	1123	436	436	7951	11234	20191107_Haura_KRAS-G12C_TMT-Batch1-H358-pY_run1	9435	7951	11234	20191107_Haura_KRAS-G12C_TMT-Batch1-H358-pY_run1	9435	7951	11234	20191107_Haura_KRAS-G12C_TMT-Batch1-H358-pY_run1	9435	Phosphorylation (STY)	1	STVLQQQpYNR	8>>n	436>>n	1	1	STVLQQQYNR	STVLQQQpYNR;Q9Y490;EDSVSPKKSTVLQQQYNRVGKVEHGSVALPA;8;1;8>>n	ph_Q9Y490:436
sp|Q86X29|LSR_HUMAN	sp|Q86X29|LSR_HUMAN	Q86X29	__Other	Q86X29	Q86X29	sp|Q86X29|LSR_HUMAN Lipolysis-stimulated lipoprotein receptor OS=Homo sapiens OX=9606 GN=LSR PE=1 SV=4	0.999828	37.6509	2.11014e-56	253.42	203.13	+	1	PGDVDRSSSAGGQGSYVPLLRDTDSSVASEV	X;X;X;X;X;X;X;X;X;X;X;X;X;X;X;Phospho (STY);X;X;X;X;X;X;X;X;X;X;X;X;X;X;X	XXXXXXPPPPPPPPPPPPPPPXXXXXXXXXX	SSSAGGQGSY(1)VPLLR	S(-151.8)S(-147.23)S(-121.39)AGGQGS(-37.65)Y(37.65)VPLLR	10	2	-1.1921	---	---	2149	777	372	372	7822	11051	20191107_Haura_KRAS-G12C_TMT-Batch1-H358-pY_run1	13569	7822	11051	20191107_Haura_KRAS-G12C_TMT-Batch1-H358-pY_run1	13569	7822	11051	20191107_Haura_KRAS-G12C_TMT-Batch1-H358-pY_run1	13569	Phosphorylation (STY)	1	SSSAGGQGSpYVPLLR	10>>n	372>>n	1	1	SSSAGGQGSYVPLLR	SSSAGGQGSpYVPLLR;Q86X29;PGDVDRSSSAGGQGSYVPLLRDTDSSVASEV;10;1;10>>n	ph_Q86X29:372
sp|Q14160|SCRIB_HUMAN	sp|Q14160|SCRIB_HUMAN	Q14160	__Other	Q14160	Q14160	sp|Q14160|SCRIB_HUMAN Protein scribble homolog OS=Homo sapiens OX=9606 GN=SCRIB PE=1 SV=4	1	50.1076	0.000504818	142.43	91.081	+	1	ATEAAGRGLQPLKLDYRALAAVPSAGSVQRV	X;X;X;X;X;X;X;X;X;X;X;X;X;X;X;Phospho (STY);X;X;X;X;X;X;X;X;X;X;X;X;X;X;X	XXXXXXXPPPPPPPPPPXXXXXXXXXXXXXX	GLQPLKLDY(1)R	GLQPLKLDY(50.11)R	9	3	0.52204	---	---	1933	636	1268	1268	2961	4103	20191113_Haura_KRAS-G12C_TMT-Batch3-H1792-pY_run2	13399	2959	4101	20191112_Haura_KRAS-G12C_TMT-Batch2-Calu1-pY_run2	13492	2959	4101	20191112_Haura_KRAS-G12C_TMT-Batch2-Calu1-pY_run2	13492	Phosphorylation (STY)	1	GLQPLKLDpYR	9,x	1268,x	1	1	GLQPLKLDYR	GLQPLKLDpYR;Q14160;ATEAAGRGLQPLKLDYRALAAVPSAGSVQRV;9;1;9,x	ph_Q14160:1268
sp|P42356|PI4KA_HUMAN	sp|P42356|PI4KA_HUMAN	P42356	__Other	P42356	P42356	sp|P42356|PI4KA_HUMAN Phosphatidylinositol 4-kinase alpha OS=Homo sapiens OX=9606 GN=PI4KA PE=1 SV=4	1	88.0989	5.72874e-05	157.91	112.83	+	1	FMASLNLRNRYAGEVYGMIRFSGTTGQMSDL	X;X;X;X;X;X;X;X;X;X;X;X;X;X;X;Phospho (STY);X;X;X;X;X;X;X;X;X;X;X;X;X;X;X	XXXXXXXXXXPPPPPPPPPPXXXXXXXXXXX	YAGEVY(1)GMIR	Y(-88.1)AGEVY(88.1)GMIR	6	2	-0.5545	---	---	1587	434	1154	1154	9783	13900	20191107_Haura_KRAS-G12C_TMT-Batch1-H358-pY_run2	14361	9783	13900	20191107_Haura_KRAS-G12C_TMT-Batch1-H358-pY_run2	14361	9783	13900	20191107_Haura_KRAS-G12C_TMT-Batch1-H358-pY_run2	14361	Phosphorylation (STY)	1	YAGEVpYGMIR	6>>n	1154>>n	1	1	YAGEVYGMIR	YAGEVpYGMIR;P42356;FMASLNLRNRYAGEVYGMIRFSGTTGQMSDL;6;1;6>>n	ph_P42356:1154
sp|Q9Y6M7|S4A7_HUMAN	sp|Q9Y6M7|S4A7_HUMAN	Q9Y6M7	__Other	Q9Y6M7	Q9Y6M7	sp|Q9Y6M7|S4A7_HUMAN Sodium bicarbonate cotransporter 3 OS=Homo sapiens OX=9606 GN=SLC4A7 PE=1 SV=2	0.999994	52.0049	0.00157454	72.958	60.812	+	1	LFTEMDELCYRDGEEYEWKETARWLKFEEDV	X;X;X;X;X;X;X;X;X;X;X;X;X;X;X;Phospho (STY);X;X;X;X;X;X;X;X;X;X;X;X;X;X;X	XXXXXXXXXXXPPPPPPPPPPPPXXXXXXXX	DGEEY(1)EWKETAR	DGEEY(52)EWKET(-52)AR	5	3	1.244	---	---	2761	1136	127	127	1164	1595	20191107_Haura_KRAS-G12C_TMT-Batch1-H358-pY_run2	11230	1164	1595	20191107_Haura_KRAS-G12C_TMT-Batch1-H358-pY_run2	11230	1164	1595	20191107_Haura_KRAS-G12C_TMT-Batch1-H358-pY_run2	11230	Phosphorylation (STY)	1	DGEEpYEWKETAR	5>>n	127>>n	1	1	DGEEYEWKETAR	DGEEpYEWKETAR;Q9Y6M7;LFTEMDELCYRDGEEYEWKETARWLKFEEDV;5;1;5>>n	ph_Q9Y6M7:127
sp|Q02487|DSC2_HUMAN	sp|Q02487|DSC2_HUMAN	Q02487	__Other	Q02487	Q02487	sp|Q02487|DSC2_HUMAN Desmocollin-2 OS=Homo sapiens OX=9606 GN=DSC2 PE=1 SV=1	1	90.3633	1.39076e-18	167.89	143.04	+	1	VYLCNQDENHKHAQDYVLTYNYEGRGSVAGS	X;Phospho (STY);X;X;X;X;X;X;X;X;X;X;X;X;X;Phospho (STY);X;X;X;X;X;X;X;X;X;X;X;X;X;X;X	PPPPPPPPPPPPPPPPPPPPPPPPPXXXXXX	HAQDY(1)VLTYNYEGR	HAQDY(90.36)VLT(-90.36)Y(-115.62)NY(-135.61)EGR	5	3	-0.79096	---	---	1782	562	853	853	3420	4685	20191107_Haura_KRAS-G12C_TMT-Batch1-H358-pY_run2	12171	3420	4685	20191107_Haura_KRAS-G12C_TMT-Batch1-H358-pY_run2	12171	9660	13737	20191107_Haura_KRAS-G12C_TMT-Batch1-H358-pY_run1	12561	Phosphorylation (STY)	1	HAQDpYVLTYNYEGR	5>>n	853>>n	1	1	HAQDYVLTYNYEGR	HAQDpYVLTYNYEGR;Q02487;VYLCNQDENHKHAQDYVLTYNYEGRGSVAGS;5;1;5>>n	ph_Q02487:853
sp|P27824|CALX_HUMAN	sp|P27824|CALX_HUMAN	P27824	__Other	P27824	P27824	sp|P27824|CALX_HUMAN Calnexin OS=Homo sapiens OX=9606 GN=CANX PE=1 SV=2	1	61.7317	0.00165365	80.632	59.679	---	1	EDRKPKAEEDEILNRSPRNRKPRRE______	X;X;X;X;X;X;X;X;X;X;X;X;X;X;X;Phospho (STY);X;X;X;X;X;X;X;X;X;X;X;X;X;X;X	XXXXXXPPPPPPPPPPPPXXXXXXXXXXXXX	AEEDEILNRS(1)PR	AEEDEILNRS(61.73)PR	10	3	0.81174	---	---	176	392	583	583	139	168	20191113_Haura_KRAS-G12C_TMT-Batch3-H1792-pY_run2	10084	138	167	20191112_Haura_KRAS-G12C_TMT-Batch2-Calu1-pY_run2	10169	138	167	20191112_Haura_KRAS-G12C_TMT-Batch2-Calu1-pY_run2	10169	Phosphorylation (STY)	1	AEEDEILNRpSPR	10,x	583,x	1	1	AEEDEILNRSPR	AEEDEILNRpSPR;P27824;EDRKPKAEEDEILNRSPRNRKPRRE______;10;1;10,x	ph_P27824:583
sp|Q02487|DSC2_HUMAN	sp|Q02487|DSC2_HUMAN	Q02487;Q14574	__Other	Q02487	Q02487	sp|Q02487|DSC2_HUMAN Desmocollin-2 OS=Homo sapiens OX=9606 GN=DSC2 PE=1 SV=1;sp|Q14574|DSC3_HUMAN Desmocollin-3 OS=Homo sapiens OX=9606 GN=DSC3 PE=1 SV=3	0.882647	9.29387	3.24252e-08	167.71	152.72	+	1	SCRGGHTEVDNCRYTYSEWHSFTQPRLGEKV	X;X;X;X;X;X;X;X;X;X;X;X;X;X;X;Phospho (STY);X;X;X;X;X;X;X;X;X;X;X;X;X;X;X	XXXXXXXXXXXXXPPPPPPPPPPPPPXXXXX	Y(0.104)T(0.013)Y(0.883)S(0.001)EWHSFTQPR	Y(-9.29)T(-18.49)Y(9.29)S(-29.48)EWHS(-124.12)FT(-145.64)QPR	3	3	-0.45896	---	---	1785	562	823	823	10420	14700	20191107_Haura_KRAS-G12C_TMT-Batch1-H358-pY_run2	13222	10420	14700	20191107_Haura_KRAS-G12C_TMT-Batch1-H358-pY_run2	13222	10420	14700	20191107_Haura_KRAS-G12C_TMT-Batch1-H358-pY_run2	13222	Phosphorylation (STY)	1	YTpYSEWHSFTQPR	3>>n	823>>n	0.883	0.883	YTYSEWHSFTQPR	YTpYSEWHSFTQPR;Q02487;Q14574;SCRGGHTEVDNCRYTYSEWHSFTQPRLGEKV;3;1;3>>n	ph_Q02487:823
sp|Q659A1|ICE2_HUMAN	sp|Q659A1|ICE2_HUMAN	Q659A1	__Other	Q659A1	Q659A1	sp|Q659A1|ICE2_HUMAN Little elongation complex subunit 2 OS=Homo sapiens OX=9606 GN=ICE2 PE=1 SV=2	0.999993	51.3356	0.00858067	55.676	10.595	---	3	HHGRIPCTFPPKSLDTTTQQKIGGTRMPTRS	X;X;X;X;X;X;X;X;X;X;X;X;X;X;X;Phospho (STY);Phospho (STY);Phospho (STY);X;X;X;X;X;X;X;X;X;X;X;X;X	XXXXXXXXXXXXPPPPPPPPPXXXXXXXXXX	SLDT(1)T(1)T(1)QQK	S(-51.16)LDT(51.34)T(51.34)T(51.16)QQK	4	2	1.4133	---	---	816	721	935	935	7380	10440	20191113_Haura_KRAS-G12C_TMT-Batch3-H1792-pY_run1	9147	7380	10440	20191113_Haura_KRAS-G12C_TMT-Batch3-H1792-pY_run1	9147	7380	10440	20191113_Haura_KRAS-G12C_TMT-Batch3-H1792-pY_run1	9147	Phosphorylation (STY)	3	SLDpTpTpTQQK	4,5,6>>n	935,936,937>>n	1	1	SLDTTTQQK	SLDpTpTpTQQK;Q659A1;HHGRIPCTFPPKSLDTTTQQKIGGTRMPTRS;4;3;4,5,6>>n	ph_Q659A1:935
sp|Q659A1|ICE2_HUMAN	sp|Q659A1|ICE2_HUMAN	Q659A1	__Other	Q659A1	Q659A1	sp|Q659A1|ICE2_HUMAN Little elongation complex subunit 2 OS=Homo sapiens OX=9606 GN=ICE2 PE=1 SV=2	0.999993	51.3356	0.00858067	55.676	10.595	---	3	HGRIPCTFPPKSLDTTTQQKIGGTRMPTRSH	X;X;X;X;X;X;X;X;X;X;X;X;X;X;Phospho (STY);Phospho (STY);Phospho (STY);X;X;X;X;X;X;X;X;X;X;X;X;X;X	XXXXXXXXXXXPPPPPPPPPXXXXXXXXXXX	SLDT(1)T(1)T(1)QQK	S(-51.16)LDT(51.34)T(51.34)T(51.16)QQK	5	2	1.4133	---	---	817	721	936	936	7380	10440	20191113_Haura_KRAS-G12C_TMT-Batch3-H1792-pY_run1	9147	7380	10440	20191113_Haura_KRAS-G12C_TMT-Batch3-H1792-pY_run1	9147	7380	10440	20191113_Haura_KRAS-G12C_TMT-Batch3-H1792-pY_run1	9147	Phosphorylation (STY)	3	SLDpTpTpTQQK	4,5,6>>n	935,936,937>>n	1	1	SLDTTTQQK	SLDpTpTpTQQK;Q659A1;HGRIPCTFPPKSLDTTTQQKIGGTRMPTRSH;5;3;4,5,6>>n	ph_Q659A1:936
sp|Q659A1|ICE2_HUMAN	sp|Q659A1|ICE2_HUMAN	Q659A1	__Other	Q659A1	Q659A1	sp|Q659A1|ICE2_HUMAN Little elongation complex subunit 2 OS=Homo sapiens OX=9606 GN=ICE2 PE=1 SV=2	0.999992	51.1601	0.00858067	55.676	10.595	---	3	GRIPCTFPPKSLDTTTQQKIGGTRMPTRSHR	X;X;X;X;X;X;X;X;X;X;X;X;X;Phospho (STY);Phospho (STY);Phospho (STY);X;X;X;X;X;X;X;X;X;X;X;X;X;X;X	XXXXXXXXXXPPPPPPPPPXXXXXXXXXXXX	SLDT(1)T(1)T(1)QQK	S(-51.16)LDT(51.34)T(51.34)T(51.16)QQK	6	2	1.4133	---	---	818	721	937	937	7380	10440	20191113_Haura_KRAS-G12C_TMT-Batch3-H1792-pY_run1	9147	7380	10440	20191113_Haura_KRAS-G12C_TMT-Batch3-H1792-pY_run1	9147	7380	10440	20191113_Haura_KRAS-G12C_TMT-Batch3-H1792-pY_run1	9147	Phosphorylation (STY)	3	SLDpTpTpTQQK	4,5,6>>n	935,936,937>>n	1	1	SLDTTTQQK	SLDpTpTpTQQK;Q659A1;GRIPCTFPPKSLDTTTQQKIGGTRMPTRSHR;6;3;4,5,6>>n	ph_Q659A1:937
sp|Q86X29|LSR_HUMAN	sp|Q86X29|LSR_HUMAN	Q86X29	__Other	Q86X29	Q86X29	sp|Q86X29|LSR_HUMAN Lipolysis-stimulated lipoprotein receptor OS=Homo sapiens OX=9606 GN=LSR PE=1 SV=4	0.997833	26.6328	3.38123e-05	146.21	109.19	+	1	YRIQASQQDDSMRVLYYMEKELANFDPSRPG	X;X;X;X;X;X;X;X;X;X;X;X;X;X;X;Phospho (STY);X;Oxidation (M);X;X;X;X;X;X;X;X;X;X;X;X;X	XXXXXXXXXXXXXPPPPPPPXXXXXXXXXXX	VLY(0.998)Y(0.002)MEK	VLY(26.63)Y(-26.63)MEK	3	2	3.6107	---	---	2150	777	406	406	9356	13302	20191112_Haura_KRAS-G12C_TMT-Batch2-Calu1-pY_run2	17097	9351	13295	20191107_Haura_KRAS-G12C_TMT-Batch1-H358-pY_run1	16999	9352	13297	20191107_Haura_KRAS-G12C_TMT-Batch1-H358-pY_run1	17023	Phosphorylation (STY)	1	VLpYYMEK	3>>n	406>>n	0.998	0.998	VLYYMEK	VLpYYMEK;Q86X29;YRIQASQQDDSMRVLYYMEKELANFDPSRPG;3;1;3>>n	ph_Q86X29:406
sp|Q86X27|RGPS2_HUMAN	sp|Q86X27|RGPS2_HUMAN	Q86X27	__Other	Q86X27	Q86X27	sp|Q86X27|RGPS2_HUMAN Ras-specific guanine nucleotide-releasing factor RalGPS2 OS=Homo sapiens OX=9606 GN=RALGPS2 PE=1 SV=1	0.999996	54.559	0.000194778	148.56	105.81	+	1	LSEETSWPAFERNRLYHSLGPVTRVARNGYR	X;X;X;X;X;X;X;X;X;X;X;X;X;X;X;Phospho (STY);X;X;X;X;X;X;X;X;X;X;X;X;X;X;X	XXXXXXXXXXXXPPPPPPPPPPPPXXXXXXX	NRLY(1)HSLGPVTR	NRLY(54.56)HS(-54.56)LGPVT(-114.74)R	4	3	-0.3393	---	---	2145	776	420	420	5973	8530	20191112_Haura_KRAS-G12C_TMT-Batch2-Calu1-pY_run2	8581	5432	7838	20191112_Haura_KRAS-G12C_TMT-Batch2-Calu1-pY_run2	11165	5432	7838	20191112_Haura_KRAS-G12C_TMT-Batch2-Calu1-pY_run2	11165	Phosphorylation (STY)	1	NRLpYHSLGPVTR	4>>n	420>>n	1	1	NRLYHSLGPVTR	NRLpYHSLGPVTR;Q86X27;LSEETSWPAFERNRLYHSLGPVTRVARNGYR;4;1;4>>n	ph_Q86X27:420
sp|Q7Z698|SPRE2_HUMAN	sp|Q7Z698|SPRE2_HUMAN	Q7Z698	__Other	Q7Z698	Q7Z698	sp|Q7Z698|SPRE2_HUMAN Sprouty-related, EVH1 domain-containing protein 2 OS=Homo sapiens OX=9606 GN=SPRED2 PE=1 SV=2	0.98645	19.6452	5.6778e-07	124.46	103.22	+	1	VRGKYPDPSEDADSSYVRFAKGEVPKHDYNY	X;X;X;X;X;X;X;X;X;X;X;X;X;X;X;Phospho (STY);X;X;X;X;X;X;X;X;X;X;X;X;X;X;X	XXPPPPPPPPPPPPPPPPXXXXXXXXXXXXX	GKYPDPSEDADS(0.003)S(0.011)Y(0.986)VR	GKY(-105.01)PDPS(-86.3)EDADS(-25.4)S(-19.65)Y(19.65)VR	14	3	1.1524	---	---	2121	760	251	251	2928	4052	20191107_Haura_KRAS-G12C_TMT-Batch1-H358-pY_run2	10365	2928	4052	20191107_Haura_KRAS-G12C_TMT-Batch1-H358-pY_run2	10365	2928	4052	20191107_Haura_KRAS-G12C_TMT-Batch1-H358-pY_run2	10365	Phosphorylation (STY)	1	GKYPDPSEDADSSpYVR	14>>n	251>>n	0.986	0.986	GKYPDPSEDADSSYVR	GKYPDPSEDADSSpYVR;Q7Z698;VRGKYPDPSEDADSSYVRFAKGEVPKHDYNY;14;1;14>>n	ph_Q7Z698:251
sp|P25116|PAR1_HUMAN	sp|P25116|PAR1_HUMAN	P25116	__Other	P25116	P25116	sp|P25116|PAR1_HUMAN Proteinase-activated receptor 1 OS=Homo sapiens OX=9606 GN=F2R PE=1 SV=2	1	109.34	3.25885e-09	168.64	149.35	---	2	LMASKMDTCSSNLNNSIYKKLLT________	X;X;X;X;X;Oxidation (M);X;X;X;X;X;X;X;X;X;Phospho (STY);X;Phospho (STY);X;X;X;X;X;X;X;X;X;X;X;X;X	XXXXXPPPPPPPPPPPPPPPXXXXXXXXXXX	MDTCSSNLNNS(1)IY(1)KK	MDT(-130.09)CS(-116.83)S(-109.34)NLNNS(109.34)IY(125.11)KK	11	4	-0.064849	---	---	175	383	418	418	5480	7891	20191113_Haura_KRAS-G12C_TMT-Batch3-H1792-pY_run1	12252	5485	7896	20191112_Haura_KRAS-G12C_TMT-Batch2-Calu1-pY_run2	11079	5480	7891	20191113_Haura_KRAS-G12C_TMT-Batch3-H1792-pY_run1	12252	Phosphorylation (STY)	2	MDTCSSNLNNpSIpYKK	13,11>>n	420,418>>n	1	1	MDTCSSNLNNSIYKK	MDTCSSNLNNpSIpYKK;P25116;LMASKMDTCSSNLNNSIYKKLLT________;11;2;13,11>>n	ph_P25116:418
sp|Q9C0B5|ZDHC5_HUMAN	sp|Q9C0B5|ZDHC5_HUMAN	Q9C0B5	__Other	Q9C0B5	Q9C0B5	sp|Q9C0B5|ZDHC5_HUMAN Palmitoyltransferase ZDHHC5 OS=Homo sapiens OX=9606 GN=ZDHHC5 PE=1 SV=2	1	69.1898	6.45577e-36	212.97	182.75	---	1;2	RHPRLVPTGPTHREPSPVRYDNLSRHIVASL	X;X;X;X;X;X;X;X;X;X;X;X;X;X;X;Phospho (STY);X;X;X;Phospho (STY);X;X;X;X;X;X;X;X;X;X;X	XXXXPPPPPPPPPPPPPPPPPPPPPXXXXXX	EPS(1)PVRY(1)DNLSR	EPS(69.19)PVRY(38.41)DNLS(-38.41)R	3	3	-0.18581	---	---	507	972	529	529	2074	2792	20191113_Haura_KRAS-G12C_TMT-Batch3-H1792-pY_run2	10578	5360	7750	20191113_Haura_KRAS-G12C_TMT-Batch3-H1792-pY_run1	10610	5360	7750	20191113_Haura_KRAS-G12C_TMT-Batch3-H1792-pY_run1	10610	Phosphorylation (STY)	2	EPpSPVRpYDNLSR	3,7>>n	529,533>>n	1	1	EPSPVRYDNLSR	EPpSPVRpYDNLSR;Q9C0B5;RHPRLVPTGPTHREPSPVRYDNLSRHIVASL;3;2;3,7>>n	ph_Q9C0B5:529
sp|P10398|ARAF_HUMAN	sp|P10398|ARAF_HUMAN	P10398	__Other	P10398	P10398	sp|P10398|ARAF_HUMAN Serine/threonine-protein kinase A-Raf OS=Homo sapiens OX=9606 GN=ARAF PE=1 SV=2	0.999878	39.1258	3.9688e-09	166.3	144.67	+	1	VPTVCVDMSTNRQQFYHSVQDLSGGSRQHEA	X;X;X;X;X;X;X;X;X;X;X;X;X;X;X;Phospho (STY);X;X;X;X;X;X;X;X;X;X;X;X;X;X;X	XXXXXXXXXXXXPPPPPPPPPPPPPPPXXXX	QQFY(1)HSVQDLSGGSR	QQFY(39.13)HS(-39.13)VQDLS(-133.22)GGS(-147.47)R	4	3	-0.29636	---	---	1363	298	155	155	6513	9239	20191107_Haura_KRAS-G12C_TMT-Batch1-H358-pY_run1	11513	6513	9239	20191107_Haura_KRAS-G12C_TMT-Batch1-H358-pY_run1	11513	6513	9239	20191107_Haura_KRAS-G12C_TMT-Batch1-H358-pY_run1	11513	Phosphorylation (STY)	1	QQFpYHSVQDLSGGSR	4>>n	155>>n	1	1	QQFYHSVQDLSGGSR	QQFpYHSVQDLSGGSR;P10398;VPTVCVDMSTNRQQFYHSVQDLSGGSRQHEA;4;1;4>>n	ph_P10398:155
sp|Q6NXT2|H3C_HUMAN	sp|Q6NXT2|H3C_HUMAN	P68431;P84243;Q16695;Q6NXT2;Q71DI3	__Other	Q6NXT2	Q6NXT2	sp|Q6NXT2|H3C_HUMAN Histone H3.3C OS=Homo sapiens OX=9606 GN=H3F3C PE=1 SV=3;sp|Q71DI3|H32_HUMAN Histone H3.2 OS=Homo sapiens OX=9606 GN=HIST2H3A PE=1 SV=3;sp|Q16695|H31T_HUMAN Histone H3.1t OS=Homo sapiens OX=9606 GN=HIST3H3 PE=1 SV=3;sp|P84243|H33_HUMAN	0.999982	47.4266	0.00118808	86.18	52.177	+	1	ARKSTPSTCGVKPHRYRPGTVALREIRRYQK	X;X;X;X;X;X;X;X;X;X;X;X;X;X;X;Phospho (STY);X;X;X;X;X;X;X;X;X;X;X;X;X;X;X	XXXXXXXXXXXXXXXPPPPPPPPPXXXXXXX	Y(1)RPGTVALR	Y(47.43)RPGT(-47.43)VALR	1	3	-1.4435	---	---	1738	530	41	41	10282	14533	20191112_Haura_KRAS-G12C_TMT-Batch2-Calu1-pY_run2	8670	10282	14533	20191112_Haura_KRAS-G12C_TMT-Batch2-Calu1-pY_run2	8670	10282	14533	20191112_Haura_KRAS-G12C_TMT-Batch2-Calu1-pY_run2	8670	Phosphorylation (STY)	1	pYRPGTVALR	1>>n	41>>n	1	1	YRPGTVALR	pYRPGTVALR;P68431;P84243;Q16695;Q6NXT2;Q71DI3;ARKSTPSTCGVKPHRYRPGTVALREIRRYQK;1;1;1>>n	ph_Q6NXT2:41
sp|Q7Z699|SPRE1_HUMAN	sp|Q7Z699|SPRE1_HUMAN	Q7Z699	__Other	Q7Z699	Q7Z699	sp|Q7Z699|SPRE1_HUMAN Sprouty-related, EVH1 domain-containing protein 1 OS=Homo sapiens OX=9606 GN=SPRED1 PE=1 SV=2	0.891777	9.4733	5.57605e-05	138.77	109.79	+	1	DSSIQFSKPDSKKSDYLYSCGDETKLSSPKD	X;X;X;X;X;X;X;X;X;X;X;X;X;X;X;Phospho (STY);X;X;X;X;X;X;X;X;X;X;X;X;X;X;X	XXXXXXXXXXXXPPPPPPPPPPPPPXXXXXX	KS(0.101)DY(0.892)LY(0.007)S(0.001)CGDETK	KS(-9.47)DY(9.47)LY(-21.17)S(-30.8)CGDET(-72.32)K	4	3	1.088	---	---	2122	761	292	292	4584	6588	20191113_Haura_KRAS-G12C_TMT-Batch3-H1792-pY_run2	11319	4581	6585	20191112_Haura_KRAS-G12C_TMT-Batch2-Calu1-pY_run2	11366	4581	6585	20191112_Haura_KRAS-G12C_TMT-Batch2-Calu1-pY_run2	11366	Phosphorylation (STY)	1	KSDpYLYSCGDETK	4>>n	292>>n	0.892	0.892	KSDYLYSCGDETK	KSDpYLYSCGDETK;Q7Z699;DSSIQFSKPDSKKSDYLYSCGDETKLSSPKD;4;1;4>>n	ph_Q7Z699:292
sp|P06241|FYN_HUMAN	sp|P06241|FYN_HUMAN	P06241;P09769	__Other	P06241	P06241	sp|P06241|FYN_HUMAN Tyrosine-protein kinase Fyn OS=Homo sapiens OX=9606 GN=FYN PE=1 SV=3;sp|P09769|FGR_HUMAN Tyrosine-protein kinase Fgr OS=Homo sapiens OX=9606 GN=FGR PE=1 SV=2	0.999129	30.5963	7.21342e-06	175.75	117.59	+	1	RGTFLIRESETTKGAYSLSIRDWDDMKGDHV	X;X;X;X;X;X;X;X;X;X;X;X;X;X;X;Phospho (STY);X;X;X;X;X;X;X;X;X;X;X;X;X;X;X	XXXXXXXPPPPPPPPPPPPPPXXXXXXXXXX	GAY(0.999)S(0.001)LSIR	GAY(30.6)S(-30.6)LS(-84.18)IR	3	2	1.253	---	---	1277	266	185	185	2692	3626	20191113_Haura_KRAS-G12C_TMT-Batch3-H1792-pY_run2	11548	2689	3623	20191112_Haura_KRAS-G12C_TMT-Batch2-Calu1-pY_run1	11514	2170	2926	20191112_Haura_KRAS-G12C_TMT-Batch2-Calu1-pY_run2	11061	Phosphorylation (STY)	1	GApYSLSIR	3>>n	185>>n	0.999	0.999	GAYSLSIR	GApYSLSIR;P06241;P09769;RGTFLIRESETTKGAYSLSIRDWDDMKGDHV;3;1;3>>n	ph_P06241:185
sp|P07947|YES_HUMAN	sp|P07947|YES_HUMAN	P07947	__Other	P07947	P07947	sp|P07947|YES_HUMAN Tyrosine-protein kinase Yes OS=Homo sapiens OX=9606 GN=YES1 PE=1 SV=3	0.999129	30.5963	7.21342e-06	175.75	117.59	+	1	RGIFLVRESETTKGAYSLSIRDWDEIRGDNV	X;X;X;X;X;X;X;X;X;X;X;X;X;X;X;Phospho (STY);X;X;X;X;X;X;X;X;X;X;X;X;X;X;X	XXXXXXXPPPPPPPPPPPPPPXXXXXXXXXX	GAY(0.999)S(0.001)LSIR	GAY(30.6)S(-30.6)LS(-84.18)IR	3	2	1.253	---	---	1309	277	194	194	2692	3626	20191113_Haura_KRAS-G12C_TMT-Batch3-H1792-pY_run2	11548	2689	3623	20191112_Haura_KRAS-G12C_TMT-Batch2-Calu1-pY_run1	11514	2170	2926	20191112_Haura_KRAS-G12C_TMT-Batch2-Calu1-pY_run2	11061	Phosphorylation (STY)	1	GApYSLSIR	3>>n	194>>n	0.999	0.999	GAYSLSIR	GApYSLSIR;P07947;RGIFLVRESETTKGAYSLSIRDWDEIRGDNV;3;1;3>>n	ph_P07947:194
sp|Q05397|FAK1_HUMAN	sp|Q05397|FAK1_HUMAN	Q05397	__Other	Q05397	Q05397	sp|Q05397|FAK1_HUMAN Focal adhesion kinase 1 OS=Homo sapiens OX=9606 GN=PTK2 PE=1 SV=2	0.935703	11.415	3.25041e-07	181.4	121.38	---	1;2	VKLGDFGLSRYMEDSTYYKASKGKLPIKWMA	X;X;X;X;X;X;X;X;X;X;X;Oxidation (M);X;X;Phospho (STY);Phospho (STY);Phospho (STY);Phospho (STY);X;X;X;X;X;X;X;X;X;X;X;X;X	XXXXXXXXXXPPPPPPPPPPPPXXXXXXXXX	YMEDS(0.069)T(0.936)Y(0.815)Y(0.18)KASK	Y(-60.78)MEDS(-11.41)T(11.41)Y(6.47)Y(-6.47)KAS(-45.68)K	6	3	0.79633	---	---	764	567	575	575	10213	14460	20191113_Haura_KRAS-G12C_TMT-Batch3-H1792-pY_run2	12924	10183	14413	20191112_Haura_KRAS-G12C_TMT-Batch2-Calu1-pY_run1	13646	10165	14384	20191112_Haura_KRAS-G12C_TMT-Batch2-Calu1-pY_run1	13071	Phosphorylation (STY)	2	YMEDSpTpYYKASK	6>7>>n	575>576>>n	0.936	0.763	YMEDSTYYKASK	YMEDSpTpYYKASK;Q05397;VKLGDFGLSRYMEDSTYYKASKGKLPIKWMA;6;2;6>7>>n	ph_Q05397:575
sp|P08581|MET_HUMAN	sp|P08581|MET_HUMAN	P08581	__Other	P08581	P08581	sp|P08581|MET_HUMAN Hepatocyte growth factor receptor OS=Homo sapiens OX=9606 GN=MET PE=1 SV=4	1	78.0885	3.83433e-82	261.39	238.06	+	1;2	SVSPTTEMVSNESVDYRATFPEDQFPNSSQN	Phospho (STY);X;Phospho (STY);X;X;X;X;Oxidation (M);X;Phospho (STY);X;X;X;X;X;Phospho (STY);X;X;X;X;X;X;X;X;X;X;X;X;X;X;X	PPPPPPPPPPPPPPPPPPPPPPPPPPPPPPP	SVSPTTEMVSNESVDY(1)R	S(-216.54)VS(-205.13)PT(-178.49)T(-171.14)EMVS(-116.1)NES(-78.09)VDY(78.09)R	16	2	0.80467	---	---	1336	283	1003	1003	8014	11323	20191112_Haura_KRAS-G12C_TMT-Batch2-Calu1-pY_run2	12659	8009	11314	20191107_Haura_KRAS-G12C_TMT-Batch1-H358-pY_run2	12632	8034	11355	20191112_Haura_KRAS-G12C_TMT-Batch2-Calu1-pY_run2	14749	Phosphorylation (STY)	1	SVSPTTEMVSNESVDpYR	16>>n	1003>>n	1	1	SVSPTTEMVSNESVDYR	SVSPTTEMVSNESVDpYR;P08581;SVSPTTEMVSNESVDYRATFPEDQFPNSSQN;16;1;16>>n	ph_P08581:1003
sp|Q8TEW0|PARD3_HUMAN	sp|Q8TEW0|PARD3_HUMAN	Q8TEW0	__Other	Q8TEW0	Q8TEW0	sp|Q8TEW0|PARD3_HUMAN Partitioning defective 3 homolog OS=Homo sapiens OX=9606 GN=PARD3 PE=1 SV=2	1	145.085	4.36269e-17	201.48	164.64	+	1	AKTREFRERQARERDYAEIQDFHRTFGCDDE	X;X;X;X;X;X;X;X;X;X;X;X;X;X;X;Phospho (STY);X;X;X;X;X;X;X;X;X;X;X;X;X;X;X	XXXXXXXXXXXXPPPPPPPPPPPPXXXXXXX	ERDY(1)AEIQDFHR	ERDY(145.09)AEIQDFHR	4	4	-1.4584	---	---	2257	850	1080	1080	2105	2840	20191113_Haura_KRAS-G12C_TMT-Batch3-H1792-pY_run2	9236	2094	2814	20191107_Haura_KRAS-G12C_TMT-Batch1-H358-pY_run1	9388	2094	2814	20191107_Haura_KRAS-G12C_TMT-Batch1-H358-pY_run1	9388	Phosphorylation (STY)	1	ERDpYAEIQDFHR	4,x	1080,x	1	1	ERDYAEIQDFHR	ERDpYAEIQDFHR;Q8TEW0;AKTREFRERQARERDYAEIQDFHRTFGCDDE;4;1;4,x	ph_Q8TEW0:1080
sp|Q14160|SCRIB_HUMAN	sp|Q14160|SCRIB_HUMAN	Q14160	__Other	Q14160	Q14160	sp|Q14160|SCRIB_HUMAN Protein scribble homolog OS=Homo sapiens OX=9606 GN=SCRIB PE=1 SV=4	1	57.1032	0.000333134	113.93	78.385	---	1	PAASPEQLSFRERQKYFELEVRVPQAEGPPK	X;X;X;X;X;X;X;X;X;X;X;X;X;X;X;Phospho (STY);X;X;X;X;X;X;X;X;X;X;X;X;X;X;X	XXXXXXXXXXXXXPPPPPPPPPXXXXXXXXX	Y(1)FELEVR	Y(57.1)FELEVR	1	2	2.1707	---	---	1934	636	1360	1360	9906	14047	20191107_Haura_KRAS-G12C_TMT-Batch1-H358-pY_run2	15474	6413	9121	20191107_Haura_KRAS-G12C_TMT-Batch1-H358-pY_run2	13179	6413	9121	20191107_Haura_KRAS-G12C_TMT-Batch1-H358-pY_run2	13179	Phosphorylation (STY)	1	pYFELEVR	1,x	1360,x	1	1	YFELEVR	pYFELEVR;Q14160;PAASPEQLSFRERQKYFELEVRVPQAEGPPK;1;1;1,x	ph_Q14160:1360
sp|P29323|EPHB2_HUMAN	sp|P29323|EPHB2_HUMAN	P29323	__Other	P29323	P29323	sp|P29323|EPHB2_HUMAN Ephrin type-B receptor 2 OS=Homo sapiens OX=9606 GN=EPHB2 PE=1 SV=5	0.848135	7.48252	8.68939e-05	109.21	65.079	---	1	AIVCNRRGFERADSEYTDKLQHYTSGHMTPG	X;X;X;X;X;X;X;X;X;X;X;X;X;X;X;Phospho (STY);X;X;X;X;X;X;X;X;X;X;X;X;X;X;X	XXXXXXXXXXXPPPPPPPPXXXXXXXXXXXX	ADSEY(0.848)T(0.151)DK	ADS(-32.9)EY(7.48)T(-7.48)DK	5	2	2.3839	---	---	1521	400	577	577	109	127	20191107_Haura_KRAS-G12C_TMT-Batch1-H358-pY_run1	8472	111	129	20191112_Haura_KRAS-G12C_TMT-Batch2-Calu1-pY_run1	8293	111	129	20191112_Haura_KRAS-G12C_TMT-Batch2-Calu1-pY_run1	8293	Phosphorylation (STY)	1	ADSEpYTDK	5>>n	577>>n	0.848	0.848	ADSEYTDK	ADSEpYTDK;P29323;AIVCNRRGFERADSEYTDKLQHYTSGHMTPG;5;1;5>>n	ph_P29323:577
sp|O75815|BCAR3_HUMAN	sp|O75815|BCAR3_HUMAN	O75815	__Other	O75815	O75815	sp|O75815|BCAR3_HUMAN Breast cancer anti-estrogen resistance protein 3 OS=Homo sapiens OX=9606 GN=BCAR3 PE=1 SV=1	1	71.6956	2.19049e-15	163.42	139.86	+	1	TFTFRDPHLLDPTVEYVKFSKERHIMDRTPE	X;X;X;X;X;X;X;X;X;X;X;X;X;X;X;Phospho (STY);X;X;X;X;X;X;X;X;X;X;X;X;X;X;X	PPPPPPPPPPPPPPPPPPXXXXXXXXXXXXX	HGETFTFRDPHLLDPTVEY(1)VK	HGET(-146.08)FT(-146.26)FRDPHLLDPT(-71.7)VEY(71.7)VK	19	4	1.3732	---	---	1189	207	117	117	3461	4731	20191112_Haura_KRAS-G12C_TMT-Batch2-Calu1-pY_run1	14219	3461	4731	20191112_Haura_KRAS-G12C_TMT-Batch2-Calu1-pY_run1	14219	3461	4731	20191112_Haura_KRAS-G12C_TMT-Batch2-Calu1-pY_run1	14219	Phosphorylation (STY)	1	HGETFTFRDPHLLDPTVEpYVK	19>>n	117>>n	1	1	HGETFTFRDPHLLDPTVEYVK	HGETFTFRDPHLLDPTVEpYVK;O75815;TFTFRDPHLLDPTVEYVKFSKERHIMDRTPE;19;1;19>>n	ph_O75815:117
sp|P16144|ITB4_HUMAN	sp|P16144|ITB4_HUMAN	P16144	__Other	P16144	P16144	sp|P16144|ITB4_HUMAN Integrin beta-4 OS=Homo sapiens OX=9606 GN=ITGB4 PE=1 SV=5	1	67.4962	7.20476e-07	170.22	109.25	+	1;2	VPHRVLSTSSTLTRDYNSLTRSEHSHSTTLP	X;X;X;X;X;X;X;X;X;X;X;X;X;X;X;Phospho (STY);X;Phospho (STY);X;X;X;X;X;X;X;X;X;X;X;X;X	XXXXPPPPPPPPPPPPPPPPPXXXXXXXXXX	DY(1)NSLTR	DY(67.5)NS(-67.5)LT(-130.67)R	2	2	-0.063959	---	---	1407	333	1492	1492	1672	2262	20191112_Haura_KRAS-G12C_TMT-Batch2-Calu1-pY_run1	8672	1672	2262	20191112_Haura_KRAS-G12C_TMT-Batch2-Calu1-pY_run1	8672	9344	13286	20191112_Haura_KRAS-G12C_TMT-Batch2-Calu1-pY_run1	13736	Phosphorylation (STY)	1	DpYNSLTR	2>>n	1492>>n	1	1	DYNSLTR	DpYNSLTR;P16144;VPHRVLSTSSTLTRDYNSLTRSEHSHSTTLP;2;1;2>>n	ph_P16144:1492
sp|Q9Y6M9|NDUB9_HUMAN	sp|Q9Y6M9|NDUB9_HUMAN	Q9Y6M9	__Other	Q9Y6M9	Q9Y6M9	sp|Q9Y6M9|NDUB9_HUMAN NADH dehydrogenase [ubiquinone] 1 beta subcomplex subunit 9 OS=Homo sapiens OX=9606 GN=NDUFB9 PE=1 SV=3	0.999956	43.604	0.000564857	87.913	43.275	+	1	CLDDWHPSEKAMYPDYFAKREQWKKLRRESW	X;X;X;X;X;X;X;X;X;X;X;X;X;X;X;Phospho (STY);X;X;X;X;X;X;X;X;X;X;X;X;X;X;X	XXXXXXXXXXPPPPPPPPPPXXXXXXXXXXX	AMYPDY(1)FAKR	AMY(-43.6)PDY(43.6)FAKR	6	3	1.1065	---	---	2764	1137	118	118	527	747	20191107_Haura_KRAS-G12C_TMT-Batch1-H358-pY_run1	13130	527	747	20191107_Haura_KRAS-G12C_TMT-Batch1-H358-pY_run1	13130	527	747	20191107_Haura_KRAS-G12C_TMT-Batch1-H358-pY_run1	13130	Phosphorylation (STY)	1	AMYPDpYFAKR	6>>n	118>>n	1	1	AMYPDYFAKR	AMYPDpYFAKR;Q9Y6M9;CLDDWHPSEKAMYPDYFAKREQWKKLRRESW;6;1;6>>n	ph_Q9Y6M9:118
sp|Q9Y4H2|IRS2_HUMAN	sp|Q9Y4H2|IRS2_HUMAN	Q9Y4H2	__Other	Q9Y4H2	Q9Y4H2	sp|Q9Y4H2|IRS2_HUMAN Insulin receptor substrate 2 OS=Homo sapiens OX=9606 GN=IRS2 PE=1 SV=2	0.996932	25.1187	3.24539e-08	150.34	133.12	+	1	YKASSPAESSPEDSGYMRMWCGSKLSMEHAD	X;X;X;X;X;X;X;X;X;X;X;X;X;X;X;Phospho (STY);Oxidation (M);X;X;X;X;X;X;X;X;X;X;X;X;X;X	XXPPPPPPPPPPPPPPPPXXXXXXXXXXXXX	ASSPAESSPEDS(0.003)GY(0.997)MR	AS(-142.51)S(-139.36)PAES(-114.71)S(-91.45)PEDS(-25.12)GY(25.12)MR	14	3	-1.8733	---	---	2747	1127	742	742	756	1057	20191112_Haura_KRAS-G12C_TMT-Batch2-Calu1-pY_run2	9216	756	1057	20191112_Haura_KRAS-G12C_TMT-Batch2-Calu1-pY_run2	9216	756	1057	20191112_Haura_KRAS-G12C_TMT-Batch2-Calu1-pY_run2	9216	Phosphorylation (STY)	1	ASSPAESSPEDSGpYMR	14>>n	742>>n	0.997	0.997	ASSPAESSPEDSGYMR	ASSPAESSPEDSGpYMR;Q9Y4H2;YKASSPAESSPEDSGYMRMWCGSKLSMEHAD;14;1;14>>n	ph_Q9Y4H2:742
sp|Q9UQE7|SMC3_HUMAN	sp|Q9UQE7|SMC3_HUMAN	Q9UQE7	__Other	Q9UQE7	Q9UQE7	sp|Q9UQE7|SMC3_HUMAN Structural maintenance of chromosomes protein 3 OS=Homo sapiens OX=9606 GN=SMC3 PE=1 SV=2	0.999892	39.887	0.00145738	68.83	56.204	+	1	AFYTCVEVTAGNRLFYHIVDSDEVSTKILME	X;X;X;X;X;X;X;X;X;X;X;X;X;X;X;Phospho (STY);X;X;X;X;X;X;X;X;X;X;X;X;X;X;X	XXXXXXXXXXXXXPPPPPPPPPPPPPPXXXX	LFY(1)HIVDSDEVSTK	LFY(39.89)HIVDS(-39.89)DEVS(-55.14)T(-56.98)K	3	3	0.63483	---	---	2711	1108	560	560	4904	7023	20191113_Haura_KRAS-G12C_TMT-Batch3-H1792-pY_run2	15874	4901	7020	20191107_Haura_KRAS-G12C_TMT-Batch1-H358-pY_run1	15910	4901	7020	20191107_Haura_KRAS-G12C_TMT-Batch1-H358-pY_run1	15910	Phosphorylation (STY)	1	LFpYHIVDSDEVSTK	3>>n	560>>n	1	1	LFYHIVDSDEVSTK	LFpYHIVDSDEVSTK;Q9UQE7;AFYTCVEVTAGNRLFYHIVDSDEVSTKILME;3;1;3>>n	ph_Q9UQE7:560
sp|P08670|VIME_HUMAN	sp|P08670|VIME_HUMAN	P08670	__Other	P08670	P08670	sp|P08670|VIME_HUMAN Vimentin OS=Homo sapiens OX=9606 GN=VIM PE=1 SV=4	0.999979	46.716	1.36576e-22	229.48	185.17	+	1	_____MSTRSVSSSSYRRMFGGPGTASRPSS	X;X;X;X;X;X;X;X;X;X;X;X;X;X;X;Phospho (STY);X;X;X;X;X;X;X;X;X;X;X;X;X;X;X	XXXXXXXXXPPPPPPPPPXXXXXXXXXXXXX	SVSSSSY(1)RR	S(-212.86)VS(-157.28)S(-119.77)S(-74.41)S(-46.72)Y(46.72)RR	7	3	-1.2013	---	---	1344	285	11	11	8047	11372	20191112_Haura_KRAS-G12C_TMT-Batch2-Calu1-pY_run1	5087	8047	11372	20191112_Haura_KRAS-G12C_TMT-Batch2-Calu1-pY_run1	5087	8047	11372	20191112_Haura_KRAS-G12C_TMT-Batch2-Calu1-pY_run1	5087	Phosphorylation (STY)	1	SVSSSSpYRR	7>>n	11>>n	1	1	SVSSSSYRR	SVSSSSpYRR;P08670;_____MSTRSVSSSSYRRMFGGPGTASRPSS;7;1;7>>n	ph_P08670:11
sp|Q13480|GAB1_HUMAN	sp|Q13480|GAB1_HUMAN	Q13480	__Other	Q13480	Q13480	sp|Q13480|GAB1_HUMAN GRB2-associated-binding protein 1 OS=Homo sapiens OX=9606 GN=GAB1 PE=1 SV=2	1	125.041	3.69112e-75	275.48	242.85	+	1	VDLNKLRKDASSQDCYDIPRAFPSDRSSSLE	X;X;X;X;X;X;X;X;X;X;X;X;X;X;X;Phospho (STY);X;X;X;X;X;X;X;X;X;X;X;X;X;X;X	XXXXXXXPPPPPPPPPPPPPXXXXXXXXXXX	DASSQDCY(1)DIPR	DAS(-133.55)S(-125.04)QDCY(125.04)DIPR	8	3	-0.9875	---	---	1894	615	406	406	1139	1567	20191112_Haura_KRAS-G12C_TMT-Batch2-Calu1-pY_run2	9968	1138	1564	20191112_Haura_KRAS-G12C_TMT-Batch2-Calu1-pY_run2	9963	1138	1564	20191112_Haura_KRAS-G12C_TMT-Batch2-Calu1-pY_run2	9963	Phosphorylation (STY)	1	DASSQDCpYDIPR	8>>n	406>>n	1	1	DASSQDCYDIPR	DASSQDCpYDIPR;Q13480;VDLNKLRKDASSQDCYDIPRAFPSDRSSSLE;8;1;8>>n	ph_Q13480:406
sp|Q04837|SSBP_HUMAN	sp|Q04837|SSBP_HUMAN	Q04837	__Other	Q04837	Q04837	sp|Q04837|SSBP_HUMAN Single-stranded DNA-binding protein, mitochondrial OS=Homo sapiens OX=9606 GN=SSBP1 PE=1 SV=1	0.999429	32.4297	0.000315653	86.772	59.363	+	1	KGSRIYLEGKIDYGEYMDKNNVRRQATTIIA	X;X;X;X;X;X;X;X;X;X;X;X;X;X;X;Phospho (STY);X;X;X;X;X;X;X;X;X;X;X;X;X;X;X	XXXXXXXXXXPPPPPPPPPPPPPXXXXXXXX	IDY(0.001)GEY(0.999)MDKNNVR	IDY(-32.43)GEY(32.43)MDKNNVR	6	3	1.5697	---	---	1794	565	119	119	3857	5388	20191107_Haura_KRAS-G12C_TMT-Batch1-H358-pY_run1	12673	3857	5388	20191107_Haura_KRAS-G12C_TMT-Batch1-H358-pY_run1	12673	3857	5388	20191107_Haura_KRAS-G12C_TMT-Batch1-H358-pY_run1	12673	Phosphorylation (STY)	1	IDYGEpYMDKNNVR	6>>n	119>>n	0.999	0.999	IDYGEYMDKNNVR	IDYGEpYMDKNNVR;Q04837;KGSRIYLEGKIDYGEYMDKNNVRRQATTIIA;6;1;6>>n	ph_Q04837:119
sp|O60716|CTND1_HUMAN	sp|O60716|CTND1_HUMAN	O60716	__Other	O60716	O60716	sp|O60716|CTND1_HUMAN Catenin delta-1 OS=Homo sapiens OX=9606 GN=CTNND1 PE=1 SV=1	0.999996	53.7051	8.44472e-109	301.53	254.34	+	1;2	QMSNMGSNTKSLDNNYSTPNERGDHNRTLDR	X;X;X;X;X;X;X;X;X;X;Phospho (STY);X;X;X;X;Phospho (STY);Phospho (STY);Phospho (STY);X;X;X;X;X;X;X;X;X;Phospho (STY);X;X;X	XXXXXXXXXXPPPPPPPPPPPPPPPPPPPPP	SLDNNY(1)STPNER	S(-131.58)LDNNY(53.71)S(-53.71)T(-82.56)PNER	6	2	-0.65856	---	---	1158	189	904	904	7349	10374	20191113_Haura_KRAS-G12C_TMT-Batch3-H1792-pY_run1	8743	7344	10351	20191107_Haura_KRAS-G12C_TMT-Batch1-H358-pY_run2	8894	7344	10351	20191107_Haura_KRAS-G12C_TMT-Batch1-H358-pY_run2	8894	Phosphorylation (STY)	1	SLDNNpYSTPNER	6>>n	904>>n	1	1	SLDNNYSTPNER	SLDNNpYSTPNER;O60716;QMSNMGSNTKSLDNNYSTPNERGDHNRTLDR;6;1;6>>n	ph_O60716:904
REV__sp|Q9H0C3|TM117_HUMAN	REV__sp|Q9H0C3|TM117_HUMAN	---	__REV	REV__Q9H0C3	REV__Q9H0C3	---	0.96482	11.3559	0.0442094	44.765	14.327	+	3	---	X;X;X;X;X;X;X;X;Phospho (STY);X;Phospho (STY);X;X;X;X;Phospho (STY);X;X;X;X;X;X;X;X;X;X;X;X;X;X;X	XXXXXXPPPPPPPPPPPXXXXXXXXXXXXXX	DLS(0.997)ES(0.519)KDVT(0.519)Y(0.965)K	DLS(21.53)ES(0)KDVT(0)Y(11.36)K	10	4	0.712	+	---	1017	87	174	174	1341	1793	20191113_Haura_KRAS-G12C_TMT-Batch3-H1792-pY_run1	10684	1341	1793	20191113_Haura_KRAS-G12C_TMT-Batch3-H1792-pY_run1	10684	1341	1793	20191113_Haura_KRAS-G12C_TMT-Batch3-H1792-pY_run1	10684	Phosphorylation (STY)	3	DLpSEpSKDVTpYK	3,10>>5,n	167,174>>169,n	0.965	0.499	DLSESKDVTYK	DLpSEpSKDVTpYK;---;---;10;3;3,10>>5,n	ph_REV__Q9H0C3:174
sp|Q99959|PKP2_HUMAN	sp|Q99959|PKP2_HUMAN	Q99959	__Other	Q99959	Q99959	sp|Q99959|PKP2_HUMAN Plakophilin-2 OS=Homo sapiens OX=9606 GN=PKP2 PE=1 SV=2	0.999991	50.764	4.94376e-05	168.83	95.594	+	1;2	TTATYEGRWGRGTAQYSSQKSVEERSLRHPL	X;X;X;X;Phospho (STY);X;X;X;X;X;X;X;X;X;X;Phospho (STY);X;X;X;X;Phospho (STY);X;X;X;X;X;X;X;X;X;X	XXXXXXXXXXXPPPPPPPPPPPPPPXXXXXX	GTAQY(1)SSQK	GT(-50.76)AQY(50.76)S(-63.39)S(-90.04)QK	5	3	0.97785	---	---	2461	950	130	130	3270	4509	20191112_Haura_KRAS-G12C_TMT-Batch2-Calu1-pY_run2	7232	3268	4505	20191112_Haura_KRAS-G12C_TMT-Batch2-Calu1-pY_run1	7139	3268	4505	20191112_Haura_KRAS-G12C_TMT-Batch2-Calu1-pY_run1	7139	Phosphorylation (STY)	1	GTAQpYSSQK	5>>n	130>>n	1	1	GTAQYSSQK	GTAQpYSSQK;Q99959;TTATYEGRWGRGTAQYSSQKSVEERSLRHPL;5;1;5>>n	ph_Q99959:130
sp|Q9C0B5|ZDHC5_HUMAN	sp|Q9C0B5|ZDHC5_HUMAN	Q9C0B5	__Other	Q9C0B5	Q9C0B5	sp|Q9C0B5|ZDHC5_HUMAN Palmitoyltransferase ZDHHC5 OS=Homo sapiens OX=9606 GN=ZDHHC5 PE=1 SV=2	0.999616	34.1627	9.17455e-18	211.52	163.92	+	1	GQLQSIRSEGTTSTSYKSLANQTRNGSLSYD	X;X;X;X;X;X;X;X;X;X;X;X;X;X;X;Phospho (STY);X;X;X;X;X;X;X;X;X;X;X;X;X;X;X	XXXXXXXPPPPPPPPPPXXXXXXXXXXXXXX	SEGTTSTSY(1)K	S(-170.36)EGT(-118.91)T(-104.5)S(-73.63)T(-63.62)S(-34.16)Y(34.16)K	9	2	1.7476	---	---	2494	972	456	456	7032	9913	20191112_Haura_KRAS-G12C_TMT-Batch2-Calu1-pY_run1	7685	7032	9913	20191112_Haura_KRAS-G12C_TMT-Batch2-Calu1-pY_run1	7685	7032	9913	20191112_Haura_KRAS-G12C_TMT-Batch2-Calu1-pY_run1	7685	Phosphorylation (STY)	1	SEGTTSTSpYK	9>>n	456>>n	1	1	SEGTTSTSYK	SEGTTSTSpYK;Q9C0B5;GQLQSIRSEGTTSTSYKSLANQTRNGSLSYD;9;1;9>>n	ph_Q9C0B5:456
sp|Q09666|AHNK_HUMAN	sp|Q09666|AHNK_HUMAN	Q09666	__Other	Q09666	Q09666	sp|Q09666|AHNK_HUMAN Neuroblast differentiation-associated protein AHNAK OS=Homo sapiens OX=9606 GN=AHNAK PE=1 SV=2	0.999688	35.0556	3.9251e-08	141.86	107.92	+	1	PDVDLHMKGPKVKGEYDMTVPKLEGDLKGPK	X;X;X;X;X;X;X;X;X;X;X;X;X;X;X;Phospho (STY);X;Oxidation (M);X;X;X;X;X;X;X;X;X;X;X;X;X	XXXXXXXXXXXPPPPPPPPPPPPPPPPPXXX	VKGEY(1)DMTVPK	VKGEY(35.06)DMT(-35.06)VPK	5	3	4.036	---	---	1853	586	964	964	9218	13028	20191107_Haura_KRAS-G12C_TMT-Batch1-H358-pY_run2	12273	9228	13038	20191112_Haura_KRAS-G12C_TMT-Batch2-Calu1-pY_run1	14511	9228	13038	20191112_Haura_KRAS-G12C_TMT-Batch2-Calu1-pY_run1	14511	Phosphorylation (STY)	1	VKGEpYDMTVPK	5>>n	964>>n	1	1	VKGEYDMTVPK	VKGEpYDMTVPK;Q09666;PDVDLHMKGPKVKGEYDMTVPKLEGDLKGPK;5;1;5>>n	ph_Q09666:964
sp|O75369|FLNB_HUMAN	sp|O75369|FLNB_HUMAN	O75369	__Other	O75369	O75369	sp|O75369|FLNB_HUMAN Filamin-B OS=Homo sapiens OX=9606 GN=FLNB PE=1 SV=2	0.999856	38.514	0.00020974	148.94	98.337	+	1	SILVESVTRSSTETCYSAIPKASSDASKVTS	X;X;X;X;X;X;X;X;X;X;X;X;X;X;X;Phospho (STY);X;X;X;X;X;X;X;X;X;X;X;X;X;X;X	XXXXXXXXXPPPPPPPPPPPPXXXXXXXXXX	SSTETCY(1)SAIPK	S(-71.08)S(-71.08)T(-72.1)ET(-54.74)CY(38.51)S(-38.51)AIPK	7	3	1.3198	---	---	1178	199	2502	2502	7861	11108	20191112_Haura_KRAS-G12C_TMT-Batch2-Calu1-pY_run1	11187	7858	11105	20191107_Haura_KRAS-G12C_TMT-Batch1-H358-pY_run1	11391	7858	11105	20191107_Haura_KRAS-G12C_TMT-Batch1-H358-pY_run1	11391	Phosphorylation (STY)	1	SSTETCpYSAIPK	7>>n	2502>>n	1	1	SSTETCYSAIPK	SSTETCpYSAIPK;O75369;SILVESVTRSSTETCYSAIPKASSDASKVTS;7;1;7>>n	ph_O75369:2502
sp|P55196|AFAD_HUMAN	sp|P55196|AFAD_HUMAN	P55196	__Other	P55196	P55196	sp|P55196|AFAD_HUMAN Afadin OS=Homo sapiens OX=9606 GN=AFDN PE=1 SV=3	0.999968	44.9482	4.55324e-05	171.36	116.95	+	1	RPEAYPIPTQTYTREYFTFPASKSQDRMAPP	X;X;X;X;X;X;X;X;X;X;X;X;X;X;X;Phospho (STY);X;X;X;X;X;X;X;X;X;X;X;X;X;X;X	XXXXXXXXXXXXXXPPPPPPPPPXXXXXXXX	EY(1)FTFPASK	EY(44.95)FT(-44.95)FPAS(-133.2)K	2	2	4.0155	---	---	1670	492	1230	1230	2310	3131	20191112_Haura_KRAS-G12C_TMT-Batch2-Calu1-pY_run1	15961	2310	3131	20191112_Haura_KRAS-G12C_TMT-Batch2-Calu1-pY_run1	15961	2310	3131	20191112_Haura_KRAS-G12C_TMT-Batch2-Calu1-pY_run1	15961	Phosphorylation (STY)	1	EpYFTFPASK	2>>n	1230>>n	1	1	EYFTFPASK	EpYFTFPASK;P55196;RPEAYPIPTQTYTREYFTFPASKSQDRMAPP;2;1;2>>n	ph_P55196:1230
sp|Q86SQ4|AGRG6_HUMAN	sp|Q86SQ4|AGRG6_HUMAN	Q86SQ4	__Other	Q86SQ4	Q86SQ4	sp|Q86SQ4|AGRG6_HUMAN Adhesion G-protein coupled receptor G6 OS=Homo sapiens OX=9606 GN=ADGRG6 PE=1 SV=3	0.965082	15.0053	0.00159382	75.378	38.685	+	1	NSTYLTSKSKSSSTTYFKRNSHTDNVSYEHS	X;X;X;Phospho (STY);X;X;X;X;X;X;X;X;X;X;X;Phospho (STY);X;X;X;X;X;X;X;X;X;X;X;X;X;X;X	XXXXXXXXXXPPPPPPPPPXXXXXXXXXXXX	SSS(0.002)T(0.002)T(0.03)Y(0.965)FKR	S(-37.26)S(-37.26)S(-27.2)T(-26.35)T(-15.01)Y(15.01)FKR	6	3	2.7346	---	---	2135	767	1184	1184	7844	11086	20191112_Haura_KRAS-G12C_TMT-Batch2-Calu1-pY_run1	8622	7845	11087	20191112_Haura_KRAS-G12C_TMT-Batch2-Calu1-pY_run2	8745	7845	11087	20191112_Haura_KRAS-G12C_TMT-Batch2-Calu1-pY_run2	8745	Phosphorylation (STY)	1	SSSTTpYFKR	6>>n	1184>>n	0.965	0.965	SSSTTYFKR	SSSTTpYFKR;Q86SQ4;NSTYLTSKSKSSSTTYFKRNSHTDNVSYEHS;6;1;6>>n	ph_Q86SQ4:1184
sp|Q8WZ64|ARAP2_HUMAN	sp|Q8WZ64|ARAP2_HUMAN	Q8WZ64	__Other	Q8WZ64	Q8WZ64	sp|Q8WZ64|ARAP2_HUMAN Arf-GAP with Rho-GAP domain, ANK repeat and PH domain-containing protein 2 OS=Homo sapiens OX=9606 GN=ARAP2 PE=1 SV=3	0.999726	38.0743	2.09859e-05	111.74	49.74	+	1	EAATATNSFIIKSSIYDNRKEKISEDKVEDI	X;X;X;X;X;X;X;X;X;X;X;X;X;X;X;Phospho (STY);X;X;X;X;X;X;X;X;X;X;X;X;X;X;X	XXXXXXXXXXXXPPPPPPPPXXXXXXXXXXX	SSIY(1)DNRK	S(-39.25)S(-38.07)IY(38.07)DNRK	4	3	1.765	---	---	2301	870	380	380	7804	11026	20191112_Haura_KRAS-G12C_TMT-Batch2-Calu1-pY_run2	7758	7804	11026	20191112_Haura_KRAS-G12C_TMT-Batch2-Calu1-pY_run2	7758	7804	11026	20191112_Haura_KRAS-G12C_TMT-Batch2-Calu1-pY_run2	7758	Phosphorylation (STY)	1	SSIpYDNRK	4>>n	380>>n	1	1	SSIYDNRK	SSIpYDNRK;Q8WZ64;EAATATNSFIIKSSIYDNRKEKISEDKVEDI;4;1;4>>n	ph_Q8WZ64:380
sp|Q9BZG1|RAB34_HUMAN	sp|Q9BZG1|RAB34_HUMAN	Q9BZG1	__Other	Q9BZG1	Q9BZG1	sp|Q9BZG1|RAB34_HUMAN Ras-related protein Rab-34 OS=Homo sapiens OX=9606 GN=RAB34 PE=1 SV=1	1	69.642	4.7961e-26	210.41	175.87	+	1	RIGDVVRINSDDSNLYLTASKKKPTCCP___	X;X;X;X;X;X;X;X;X;X;X;X;X;X;X;Phospho (STY);X;X;X;X;X;X;X;X;X;X;X;X;X;X;X	XXXXXXXPPPPPPPPPPPPPPXXXXXXXXXX	INSDDSNLY(1)LTASK	INS(-112.14)DDS(-88.51)NLY(69.64)LT(-69.64)AS(-104.38)K	9	3	0.9179	---	---	2488	969	247	247	4065	5896	20191112_Haura_KRAS-G12C_TMT-Batch2-Calu1-pY_run1	14344	4066	5897	20191112_Haura_KRAS-G12C_TMT-Batch2-Calu1-pY_run1	14363	4066	5897	20191112_Haura_KRAS-G12C_TMT-Batch2-Calu1-pY_run1	14363	Phosphorylation (STY)	1	INSDDSNLpYLTASK	9>>n	247>>n	1	1	INSDDSNLYLTASK	INSDDSNLpYLTASK;Q9BZG1;RIGDVVRINSDDSNLYLTASKKKPTCCP___;9;1;9>>n	ph_Q9BZG1:247
sp|Q13480|GAB1_HUMAN	sp|Q13480|GAB1_HUMAN	Q13480	__Other	Q13480	Q13480	sp|Q13480|GAB1_HUMAN GRB2-associated-binding protein 1 OS=Homo sapiens OX=9606 GN=GAB1 PE=1 SV=2	0.999984	48.0174	9.8455e-10	175.74	154.74	+	1	SPPSRAPSASVDSSLYNLPRSYSHDVLPKVS	X;X;X;X;X;X;X;X;X;X;X;X;X;X;X;Phospho (STY);X;X;X;X;X;X;X;X;X;X;X;X;X;X;X	XXXXXPPPPPPPPPPPPPPPXXXXXXXXXXX	APSASVDSSLY(1)NLPR	APS(-129.52)AS(-114.25)VDS(-74.7)S(-48.02)LY(48.02)NLPR	11	3	-0.83858	---	---	1893	615	259	259	572	812	20191112_Haura_KRAS-G12C_TMT-Batch2-Calu1-pY_run2	14510	567	805	20191107_Haura_KRAS-G12C_TMT-Batch1-H358-pY_run1	14420	567	805	20191107_Haura_KRAS-G12C_TMT-Batch1-H358-pY_run1	14420	Phosphorylation (STY)	1	APSASVDSSLpYNLPR	11>>n	259>>n	1	1	APSASVDSSLYNLPR	APSASVDSSLpYNLPR;Q13480;SPPSRAPSASVDSSLYNLPRSYSHDVLPKVS;11;1;11>>n	ph_Q13480:259
sp|Q03135|CAV1_HUMAN	sp|Q03135|CAV1_HUMAN	Q03135	__Other	Q03135	Q03135	sp|Q03135|CAV1_HUMAN Caveolin-1 OS=Homo sapiens OX=9606 GN=CAV1 PE=1 SV=4	0.999937	42.001	9.49768e-136	295	282.07	+	1;2	__MSGGKYVDSEGHLYTVPIREQGNIYKPNN	X;X;X;X;X;X;X;Phospho (STY);X;X;Phospho (STY);X;X;X;X;Phospho (STY);X;X;X;X;X;X;X;X;X;X;Phospho (STY);X;X;X;X	XXXXXXXPPPPPPPPPPPPPPPPPPPPPPPP	YVDS(1)EGHLY(1)TVPIR	Y(-88.55)VDS(88.55)EGHLY(42)T(-42)VPIR	9	3	-1.2458	---	---	1789	563	14	14	10453	14750	20191112_Haura_KRAS-G12C_TMT-Batch2-Calu1-pY_run2	15110	10462	14775	20191112_Haura_KRAS-G12C_TMT-Batch2-Calu1-pY_run2	12712	10462	14775	20191112_Haura_KRAS-G12C_TMT-Batch2-Calu1-pY_run2	12712	Phosphorylation (STY)	2	YVDpSEGHLpYTVPIR	4,9>>n	9,14>>n	1	1	YVDSEGHLYTVPIR	YVDpSEGHLpYTVPIR;Q03135;__MSGGKYVDSEGHLYTVPIREQGNIYKPNN;9;2;4,9>>n	ph_Q03135:14
sp|Q9Y4H2|IRS2_HUMAN	sp|Q9Y4H2|IRS2_HUMAN	Q9Y4H2	__Other	Q9Y4H2	Q9Y4H2	sp|Q9Y4H2|IRS2_HUMAN Insulin receptor substrate 2 OS=Homo sapiens OX=9606 GN=IRS2 PE=1 SV=2	1	77.9171	3.75324e-34	204.23	171.3	+	1	RSYKAPYTCGGDSDQYVLMSSPVGRILEEER	X;X;X;X;X;X;X;X;X;X;X;X;X;X;X;Phospho (STY);X;X;Oxidation (M);X;X;X;X;X;X;X;X;X;X;X;X	XPPPPPPPPPPPPPPPPPPPPPPPPXXXXXX	APYTCGGDSDQY(1)VLMSSPVGR	APY(-137.36)T(-115.44)CGGDS(-77.92)DQY(77.92)VLMS(-83.33)S(-90.35)PVGR	12	3	-0.57364	---	---	2746	1127	823	823	594	845	20191112_Haura_KRAS-G12C_TMT-Batch2-Calu1-pY_run1	15286	594	845	20191112_Haura_KRAS-G12C_TMT-Batch2-Calu1-pY_run1	15286	8107	11456	20191112_Haura_KRAS-G12C_TMT-Batch2-Calu1-pY_run2	14301	Phosphorylation (STY)	1	APYTCGGDSDQpYVLMSSPVGR	12>>n	823>>n	1	1	APYTCGGDSDQYVLMSSPVGR	APYTCGGDSDQpYVLMSSPVGR;Q9Y4H2;RSYKAPYTCGGDSDQYVLMSSPVGRILEEER;12;1;12>>n	ph_Q9Y4H2:823
sp|Q8IZP0|ABI1_HUMAN	sp|Q8IZP0|ABI1_HUMAN	Q8IZP0	__Other	Q8IZP0	Q8IZP0	sp|Q8IZP0|ABI1_HUMAN Abl interactor 1 OS=Homo sapiens OX=9606 GN=ABI1 PE=1 SV=4	0.983979	18.2222	1.94276e-135	288.46	263.31	---	1;2	SPPMSGRGTLGRNTPYKTLEPVKPPTVPNDY	X;X;X;X;X;X;X;X;X;X;X;X;X;X;X;Phospho (STY);X;X;X;X;X;X;X;X;X;X;X;X;X;X;Phospho (STY)	XXXXXXXXXXXXPPPPPPPPPPPPPPPPPPP	NT(0.015)PY(0.984)KT(0.001)LEPVKPPTVPNDYMTSPAR	NT(-18.22)PY(18.22)KT(-29.12)LEPVKPPT(-144.19)VPNDY(-209.03)MT(-231.22)S(-236.63)PAR	4	4	1.5543	---	---	2188	802	198	198	6042	8614	20191112_Haura_KRAS-G12C_TMT-Batch2-Calu1-pY_run1	13793	6042	8614	20191112_Haura_KRAS-G12C_TMT-Batch2-Calu1-pY_run1	13793	6042	8614	20191112_Haura_KRAS-G12C_TMT-Batch2-Calu1-pY_run1	13793	Phosphorylation (STY)	1	NTPpYKTLEPVKPPTVPNDYMTSPAR	4>>n	198>>n	0.984	0.984	NTPYKTLEPVKPPTVPNDYMTSPAR	NTPpYKTLEPVKPPTVPNDYMTSPAR;Q8IZP0;SPPMSGRGTLGRNTPYKTLEPVKPPTVPNDY;4;1;4>>n	ph_Q8IZP0:198
sp|Q9HD67|MYO10_HUMAN	sp|Q9HD67|MYO10_HUMAN	Q9HD67	__Other	Q9HD67	Q9HD67	sp|Q9HD67|MYO10_HUMAN Unconventional myosin-X OS=Homo sapiens OX=9606 GN=MYO10 PE=1 SV=3	0.999879	40.7552	2.58323e-18	198.81	164.12	+	1	YGSQWSPDYRCSVGTYNSSGAYRFSSEGAQS	X;X;X;X;X;X;X;X;X;X;X;X;X;X;X;Phospho (STY);X;X;X;X;X;X;X;X;X;X;X;X;X;X;X	XXXXXXXXXXPPPPPPPPPPPPPXXXXXXXX	CSVGTY(1)NSSGAYR	CS(-55.12)VGT(-40.76)Y(40.76)NS(-46.21)S(-50.74)GAY(-58.92)R	6	3	-0.28162	---	---	2568	1013	1128	1128	1093	1510	20191112_Haura_KRAS-G12C_TMT-Batch2-Calu1-pY_run2	8796	1092	1509	20191112_Haura_KRAS-G12C_TMT-Batch2-Calu1-pY_run2	8779	1092	1509	20191112_Haura_KRAS-G12C_TMT-Batch2-Calu1-pY_run2	8779	Phosphorylation (STY)	1	CSVGTpYNSSGAYR	6>>n	1128>>n	1	1	CSVGTYNSSGAYR	CSVGTpYNSSGAYR;Q9HD67;YGSQWSPDYRCSVGTYNSSGAYRFSSEGAQS;6;1;6>>n	ph_Q9HD67:1128
sp|P56211|ARP19_HUMAN	sp|P56211|ARP19_HUMAN	P56211;O43768	__Other	P56211	P56211	sp|P56211|ARP19_HUMAN cAMP-regulated phosphoprotein 19 OS=Homo sapiens OX=9606 GN=ARPP19 PE=1 SV=2;sp|O43768|ENSA_HUMAN Alpha-endosulfine OS=Homo sapiens OX=9606 GN=ENSA PE=1 SV=1	0.999993	51.6768	4.04143e-11	190.96	166.11	+	1	GGSDFLRKRLQKGQKYFDSGDYNMAKAKMKN	X;X;X;X;X;X;X;X;X;X;X;X;X;X;X;Phospho (STY);X;X;X;X;X;X;X;Oxidation (M);X;X;X;X;X;X;X	XXXXXXXXXXXXPPPPPPPPPPPPPPXXXXX	Y(1)FDSGDYNMAK	Y(51.68)FDS(-51.68)GDY(-99.77)NMAK	1	2	1.1718	---	---	1132	175	59	59	9896	14037	20191112_Haura_KRAS-G12C_TMT-Batch2-Calu1-pY_run1	14237	9899	14040	20191112_Haura_KRAS-G12C_TMT-Batch2-Calu1-pY_run2	14331	9899	14040	20191112_Haura_KRAS-G12C_TMT-Batch2-Calu1-pY_run2	14331	Phosphorylation (STY)	1	pYFDSGDYNMAK	1>>n	59>>n	1	1	YFDSGDYNMAK	pYFDSGDYNMAK;P56211;O43768;GGSDFLRKRLQKGQKYFDSGDYNMAKAKMKN;1;1;1>>n	ph_P56211:59
sp|Q9H792|PEAK1_HUMAN	sp|Q9H792|PEAK1_HUMAN	Q9H792	__Other	Q9H792	Q9H792	sp|Q9H792|PEAK1_HUMAN Inactive tyrosine-protein kinase PEAK1 OS=Homo sapiens OX=9606 GN=PEAK1 PE=1 SV=4	0.998973	29.8824	7.92666e-16	121.47	100.1	+	1	GNPGDSKDMKEIEPNYESPSSNNQDKDSSQA	X;X;X;X;X;X;X;X;X;X;X;X;X;X;X;Phospho (STY);X;X;X;X;X;X;X;X;X;X;X;X;X;X;X	XXXXXXXXXXPPPPPPPPPPPPPPPPPPPPP	EIEPNY(0.999)ES(0.001)PSSNNQDKDSSQASK	EIEPNY(29.88)ES(-29.88)PS(-65.73)S(-70.93)NNQDKDS(-99.34)S(-102.42)QAS(-108.54)K	6	4	1.9972	---	---	2537	1003	387	387	1938	2609	20191113_Haura_KRAS-G12C_TMT-Batch3-H1792-pY_run1	9907	1938	2609	20191113_Haura_KRAS-G12C_TMT-Batch3-H1792-pY_run1	9907	1938	2609	20191113_Haura_KRAS-G12C_TMT-Batch3-H1792-pY_run1	9907	Phosphorylation (STY)	1	EIEPNpYESPSSNNQDKDSSQASK	6>>n	387>>n	0.999	0.999	EIEPNYESPSSNNQDKDSSQASK	EIEPNpYESPSSNNQDKDSSQASK;Q9H792;GNPGDSKDMKEIEPNYESPSSNNQDKDSSQA;6;1;6>>n	ph_Q9H792:387
sp|O14493|CLD4_HUMAN	sp|O14493|CLD4_HUMAN	O14493	__Other	O14493	O14493	sp|O14493|CLD4_HUMAN Claudin-4 OS=Homo sapiens OX=9606 GN=CLDN4 PE=1 SV=1	1	85.0256	0.000259002	145.04	105.5	+	1	YSAKYSAARSAAASNYV______________	Phospho (STY);X;X;X;X;X;X;X;X;X;X;X;X;X;X;Phospho (STY);X;X;X;X;X;X;X;X;X;X;X;X;X;X;X	XXXXXXXXXPPPPPPPPXXXXXXXXXXXXXX	SAAASNY(1)V	S(-105.04)AAAS(-85.03)NY(85.03)V	7	2	-0.33686	---	---	1066	133	208	208	6845	9662	20191113_Haura_KRAS-G12C_TMT-Batch3-H1792-pY_run2	10531	6845	9662	20191113_Haura_KRAS-G12C_TMT-Batch3-H1792-pY_run2	10531	6842	9645	20191112_Haura_KRAS-G12C_TMT-Batch2-Calu1-pY_run1	10437	Phosphorylation (STY)	1	SAAASNpYV	7>>n	208>>n	1	1	SAAASNYV	SAAASNpYV;O14493;YSAKYSAARSAAASNYV______________;7;1;7>>n	ph_O14493:208
sp|P26006|ITA3_HUMAN	sp|P26006|ITA3_HUMAN	P26006	__Other	P26006	P26006	sp|P26006|ITA3_HUMAN Integrin alpha-3 OS=Homo sapiens OX=9606 GN=ITGA3 PE=1 SV=5	1	60.1508	0.000150188	119.89	62.328	+	1	LWKCGFFKRARTRALYEAKRQKAEMKSQPSE	X;X;X;X;X;X;X;X;X;X;X;X;X;X;X;Phospho (STY);X;X;X;X;X;X;X;X;X;X;X;X;X;X;X	XXXXXXXXXXXXXPPPPPPPXXXXXXXXXXX	ALY(1)EAKR	ALY(60.15)EAKR	3	3	2.1566	---	---	1493	386	1028	1028	508	723	20191113_Haura_KRAS-G12C_TMT-Batch3-H1792-pY_run2	8902	501	715	20191107_Haura_KRAS-G12C_TMT-Batch1-H358-pY_run1	9031	506	721	20191112_Haura_KRAS-G12C_TMT-Batch2-Calu1-pY_run2	8902	Phosphorylation (STY)	1	ALpYEAKR	3,x	1028,x	1	1	ALYEAKR	ALpYEAKR;P26006;LWKCGFFKRARTRALYEAKRQKAEMKSQPSE;3;1;3,x	ph_P26006:1028
sp|Q7KZF4|SND1_HUMAN	sp|Q7KZF4|SND1_HUMAN	Q7KZF4	__Other	Q7KZF4	Q7KZF4	sp|Q7KZF4|SND1_HUMAN Staphylococcal nuclease domain-containing protein 1 OS=Homo sapiens OX=9606 GN=SND1 PE=1 SV=1	0.999972	45.577	0.000215293	101.99	71.331	+	1	EVCFTIENKTPQGREYGMIYLGKDTNGENIA	X;X;X;X;X;X;X;X;X;X;X;X;X;X;X;Phospho (STY);X;X;X;X;X;X;X;X;X;X;X;X;X;X;X	XXXXXXXXXPPPPPPPPPPPPPPXXXXXXXX	EY(1)GMIYLGK	EY(45.58)GMIY(-45.58)LGK	2	2	3.1295	---	---	2112	750	109	109	2318	3144	20191107_Haura_KRAS-G12C_TMT-Batch1-H358-pY_run1	16351	2318	3144	20191107_Haura_KRAS-G12C_TMT-Batch1-H358-pY_run1	16351	8546	12030	20191112_Haura_KRAS-G12C_TMT-Batch2-Calu1-pY_run1	13570	Phosphorylation (STY)	1	EpYGMIYLGK	2>>n	109>>n	1	1	EYGMIYLGK	EpYGMIYLGK;Q7KZF4;EVCFTIENKTPQGREYGMIYLGKDTNGENIA;2;1;2>>n	ph_Q7KZF4:109
sp|P56945|BCAR1_HUMAN	sp|P56945|BCAR1_HUMAN	P56945	__Other	P56945	P56945	sp|P56945|BCAR1_HUMAN Breast cancer anti-estrogen resistance protein 1 OS=Homo sapiens OX=9606 GN=BCAR1 PE=1 SV=2	0.987513	18.981	1.21607e-06	85.808	69.315	+	1	VSKDVPDGPLLREETYDVPPAFAKAKPFDPA	X;X;X;X;X;X;X;X;X;X;X;X;X;X;X;Phospho (STY);X;X;X;X;X;X;X;X;X;X;X;X;X;X;X	XXXPPPPPPPPPPPPPPPPPPPPPXXXXXXX	DVPDGPLLREET(0.012)Y(0.988)DVPPAFAK	DVPDGPLLREET(-18.98)Y(18.98)DVPPAFAK	13	4	0.44113	---	---	1681	497	327	327	1626	2206	20191112_Haura_KRAS-G12C_TMT-Batch2-Calu1-pY_run2	16881	1626	2206	20191112_Haura_KRAS-G12C_TMT-Batch2-Calu1-pY_run2	16881	1626	2206	20191112_Haura_KRAS-G12C_TMT-Batch2-Calu1-pY_run2	16881	Phosphorylation (STY)	1	DVPDGPLLREETpYDVPPAFAK	13>>n	327>>n	0.988	0.988	DVPDGPLLREETYDVPPAFAK	DVPDGPLLREETpYDVPPAFAK;P56945;VSKDVPDGPLLREETYDVPPAFAKAKPFDPA;13;1;13>>n	ph_P56945:327
sp|Q96J84|KIRR1_HUMAN	sp|Q96J84|KIRR1_HUMAN	Q96J84	__Other	Q96J84	Q96J84	sp|Q96J84|KIRR1_HUMAN Kin of IRRE-like protein 1 OS=Homo sapiens OX=9606 GN=KIRREL1 PE=1 SV=2	1	93.9595	2.60745e-18	192.65	176.29	+	1;2	AHEDRPSSRAVLYADYRAPGPARFDGRPSSR	X;X;X;X;X;X;X;X;X;X;X;X;Phospho (STY);X;X;Phospho (STY);X;X;X;X;X;X;X;X;X;X;X;X;X;X;X	XXXXXXXXXPPPPPPPPPPPPPPXXXXXXXX	AVLY(1)ADY(1)RAPGPAR	AVLY(93.96)ADY(93.96)RAPGPAR	7	3	-0.41114	---	---	2356	911	625	625	890	1268	20191113_Haura_KRAS-G12C_TMT-Batch3-H1792-pY_run2	11921	881	1259	20191112_Haura_KRAS-G12C_TMT-Batch2-Calu1-pY_run2	11247	881	1259	20191112_Haura_KRAS-G12C_TMT-Batch2-Calu1-pY_run2	11247	Phosphorylation (STY)	2	AVLpYADpYRAPGPAR	4,7,x	622,625,x	1	1	AVLYADYRAPGPAR	AVLpYADpYRAPGPAR;Q96J84;AHEDRPSSRAVLYADYRAPGPARFDGRPSSR;7;2;4,7,x	ph_Q96J84:625
sp|Q09666|AHNK_HUMAN	sp|Q09666|AHNK_HUMAN	Q09666	__Other	Q09666	Q09666	sp|Q09666|AHNK_HUMAN Neuroblast differentiation-associated protein AHNAK OS=Homo sapiens OX=9606 GN=AHNAK PE=1 SV=2	0.999994	51.9699	0.000590123	146.5	114.62	+	1	PDVDLHVKGTKVKGEYDVTVPKLEGELKGPK	X;X;X;X;X;X;X;X;X;X;X;X;X;X;X;Phospho (STY);X;X;X;X;X;X;X;X;X;X;X;X;X;X;X	XXXXXXXXXXXPPPPPPPPPPPXXXXXXXXX	VKGEY(1)DVTVPK	VKGEY(51.97)DVT(-51.97)VPK	5	3	3.8346	---	---	1854	586	715	715	9236	13051	20191112_Haura_KRAS-G12C_TMT-Batch2-Calu1-pY_run2	11982	9236	13051	20191112_Haura_KRAS-G12C_TMT-Batch2-Calu1-pY_run2	11982	9236	13051	20191112_Haura_KRAS-G12C_TMT-Batch2-Calu1-pY_run2	11982	Phosphorylation (STY)	1	VKGEpYDVTVPK	5>>n	715>>n	1	1	VKGEYDVTVPK	VKGEpYDVTVPK;Q09666;PDVDLHVKGTKVKGEYDVTVPKLEGELKGPK;5;1;5>>n	ph_Q09666:715
sp|Q8NFH8|REPS2_HUMAN	sp|Q8NFH8|REPS2_HUMAN	Q8NFH8	__Other	Q8NFH8	Q8NFH8	sp|Q8NFH8|REPS2_HUMAN RalBP1-associated Eps domain-containing protein 2 OS=Homo sapiens OX=9606 GN=REPS2 PE=1 SV=2	0.997639	26.2592	0.000110445	96.464	71.016	+	1	PSQAAESSPAKKDVLYSQPPSKPIRRKFRPE	X;X;X;X;X;X;X;X;X;X;X;X;X;X;X;Phospho (STY);X;X;X;X;X;X;X;X;X;X;X;X;X;X;X	XXXXXXXXXXXXPPPPPPPPPPPPPPXXXXX	DVLY(0.998)S(0.002)QPPSKPIRR	DVLY(26.26)S(-26.26)QPPS(-74.66)KPIRR	4	4	0.89754	---	---	2231	835	558	558	1622	2201	20191112_Haura_KRAS-G12C_TMT-Batch2-Calu1-pY_run2	10206	1620	2199	20191112_Haura_KRAS-G12C_TMT-Batch2-Calu1-pY_run1	10041	1618	2197	20191107_Haura_KRAS-G12C_TMT-Batch1-H358-pY_run1	10307	Phosphorylation (STY)	1	DVLpYSQPPSKPIRR	4>>n	558>>n	0.998	0.998	DVLYSQPPSKPIRR	DVLpYSQPPSKPIRR;Q8NFH8;PSQAAESSPAKKDVLYSQPPSKPIRRKFRPE;4;1;4>>n	ph_Q8NFH8:558
sp|Q9BYI3|HYCCI_HUMAN	sp|Q9BYI3|HYCCI_HUMAN	Q9BYI3	__Other	Q9BYI3	Q9BYI3	sp|Q9BYI3|HYCCI_HUMAN Hyccin OS=Homo sapiens OX=9606 GN=FAM126A PE=1 SV=2	0.999957	43.6418	5.9904e-26	130.77	39.506	+	1	ANRFSACSLQEEKLIYVSERTELPMKHQSGQ	X;X;X;X;X;X;X;X;X;X;X;X;X;X;X;Phospho (STY);X;X;X;X;X;X;X;X;X;X;X;X;X;X;X	XXXXXXXXXXXXXPPPPPPPXXXXXXXXXXX	LIY(1)VSER	LIY(43.64)VS(-43.64)ER	3	2	0.19176	---	---	2484	965	493	493	4994	7210	20191107_Haura_KRAS-G12C_TMT-Batch1-H358-pY_run1	13862	4995	7211	20191107_Haura_KRAS-G12C_TMT-Batch1-H358-pY_run2	13846	4996	7212	20191112_Haura_KRAS-G12C_TMT-Batch2-Calu1-pY_run1	13811	Phosphorylation (STY)	1	LIpYVSER	3>>n	493>>n	1	1	LIYVSER	LIpYVSER;Q9BYI3;ANRFSACSLQEEKLIYVSERTELPMKHQSGQ;3;1;3>>n	ph_Q9BYI3:493
sp|O95819|M4K4_HUMAN	sp|O95819|M4K4_HUMAN	O95819	__Other	O95819	O95819	sp|O95819|M4K4_HUMAN Mitogen-activated protein kinase kinase kinase kinase 4 OS=Homo sapiens OX=9606 GN=MAP4K4 PE=1 SV=2	1	54.5493	0.000267562	128.69	90.448	---	1	ERSKPSFHAPEPKAHYEPADRAREVEDRFRK	X;X;X;X;X;X;X;X;X;X;X;X;X;X;X;Phospho (STY);X;X;X;X;X;X;X;X;X;X;X;X;X;X;X	XXXXXXXXXXXXXPPPPPPPPXXXXXXXXXX	AHY(1)EPADR	AHY(54.55)EPADR	3	2	0.45234	---	---	1230	236	560	560	369	562	20191113_Haura_KRAS-G12C_TMT-Batch3-H1792-pY_run2	5381	366	558	20191107_Haura_KRAS-G12C_TMT-Batch1-H358-pY_run2	5438	365	556	20191107_Haura_KRAS-G12C_TMT-Batch1-H358-pY_run1	5477	Phosphorylation (STY)	1	AHpYEPADR	3,x	560,x	1	1	AHYEPADR	AHpYEPADR;O95819;ERSKPSFHAPEPKAHYEPADRAREVEDRFRK;3;1;3,x	ph_O95819:560
sp|P29317|EPHA2_HUMAN	sp|P29317|EPHA2_HUMAN	P29317	__Other	P29317	P29317	sp|P29317|EPHA2_HUMAN Ephrin type-A receptor 2 OS=Homo sapiens OX=9606 GN=EPHA2 PE=1 SV=2	0.999747	36.3316	1.5908e-83	261.31	242.02	+	1;2	DFGLSRVLEDDPEATYTTSGGKIPIRWTAPE	X;X;X;X;X;X;X;X;X;X;X;X;X;X;Phospho (STY);Phospho (STY);X;Phospho (STY);X;X;X;X;X;X;X;X;X;X;X;X;X	XXXXXXPPPPPPPPPPPPPPPPPPPPXXXXX	VLEDDPEATY(1)TTSGGK	VLEDDPEAT(-36.33)Y(36.33)T(-46.99)T(-80.8)S(-89.71)GGK	10	3	0.21436	---	---	1516	398	772	772	9288	13146	20191112_Haura_KRAS-G12C_TMT-Batch2-Calu1-pY_run1	13226	9312	13225	20191113_Haura_KRAS-G12C_TMT-Batch3-H1792-pY_run2	14140	9312	13225	20191113_Haura_KRAS-G12C_TMT-Batch3-H1792-pY_run2	14140	Phosphorylation (STY)	1	VLEDDPEATpYTTSGGK	10>>n	772>>n	1	1	VLEDDPEATYTTSGGK	VLEDDPEATpYTTSGGK;P29317;DFGLSRVLEDDPEATYTTSGGKIPIRWTAPE;10;1;10>>n	ph_P29317:772
sp|P35222|CTNB1_HUMAN	sp|P35222|CTNB1_HUMAN	P35222	__Other	P35222	P35222	sp|P35222|CTNB1_HUMAN Catenin beta-1 OS=Homo sapiens OX=9606 GN=CTNNB1 PE=1 SV=1	0.999991	50.6305	8.05523e-61	176.09	117.89	+	1	GAQGEPLGYRQDDPSYRSFHSGGYGQDALGM	X;X;X;X;X;X;X;X;X;X;X;X;X;X;X;Phospho (STY);X;X;X;X;X;X;X;X;X;X;X;X;X;X;X	XXXXXXXXXXPPPPPPPXXXXXXXXXXXXXX	QDDPSY(1)R	QDDPS(-50.63)Y(50.63)R	6	2	0.72372	---	---	1554	415	716	716	6241	8869	20191107_Haura_KRAS-G12C_TMT-Batch1-H358-pY_run2	6519	6242	8874	20191112_Haura_KRAS-G12C_TMT-Batch2-Calu1-pY_run1	6145	6242	8874	20191112_Haura_KRAS-G12C_TMT-Batch2-Calu1-pY_run1	6145	Phosphorylation (STY)	1	QDDPSpYR	6>>n	716>>n	1	1	QDDPSYR	QDDPSpYR;P35222;GAQGEPLGYRQDDPSYRSFHSGGYGQDALGM;6;1;6>>n	ph_P35222:716
sp|P00533|EGFR_HUMAN	sp|P00533|EGFR_HUMAN	P00533	__Other	P00533	P00533	sp|P00533|EGFR_HUMAN Epidermal growth factor receptor OS=Homo sapiens OX=9606 GN=EGFR PE=1 SV=2	1	157.725	3.15878e-26	224.68	156.78	+	1	KPNGIFKGSTAENAEYLRVAPQSSEFIGA__	X;X;X;X;X;X;X;X;X;X;X;X;X;X;X;Phospho (STY);X;X;X;X;X;X;X;X;X;X;X;X;X;X;X	PPPPPPPPPPPPPPPPPPXXXXXXXXXXXXX	GSTAENAEY(1)LR	GS(-177.11)T(-157.72)AENAEY(157.72)LR	9	2	-1.0515	---	---	1239	242	1197	1197	3233	4452	20191112_Haura_KRAS-G12C_TMT-Batch2-Calu1-pY_run2	9254	3233	4452	20191112_Haura_KRAS-G12C_TMT-Batch2-Calu1-pY_run2	9254	3233	4452	20191112_Haura_KRAS-G12C_TMT-Batch2-Calu1-pY_run2	9254	Phosphorylation (STY)	1	GSTAENAEpYLR	9>>n	1197>>n	1	1	GSTAENAEYLR	GSTAENAEpYLR;P00533;KPNGIFKGSTAENAEYLRVAPQSSEFIGA__;9;1;9>>n	ph_P00533:1197
sp|P18827|SDC1_HUMAN	sp|P18827|SDC1_HUMAN	P18827	__Other	P18827	P18827	sp|P18827|SDC1_HUMAN Syndecan-1 OS=Homo sapiens OX=9606 GN=SDC1 PE=1 SV=3	1	136.615	1.38532e-34	212.32	197.06	+	1	ANGGAYQKPTKQEEFYA______________	X;X;X;X;X;Phospho (STY);X;X;X;X;X;X;X;X;X;Phospho (STY);X;X;X;X;X;X;X;X;X;X;X;X;X;X;X	PPPPPPPPPPPPPPPPPXXXXXXXXXXXXXX	QANGGAYQKPTKQEEFY(1)A	QANGGAY(-167.75)QKPT(-136.62)KQEEFY(136.62)A	17	4	1.59	---	---	1437	351	309	309	6200	8807	20191107_Haura_KRAS-G12C_TMT-Batch1-H358-pY_run1	11635	6200	8807	20191107_Haura_KRAS-G12C_TMT-Batch1-H358-pY_run1	11635	6200	8807	20191107_Haura_KRAS-G12C_TMT-Batch1-H358-pY_run1	11635	Phosphorylation (STY)	1	QANGGAYQKPTKQEEFpYA	17>>n	309>>n	1	1	QANGGAYQKPTKQEEFYA	QANGGAYQKPTKQEEFpYA;P18827;ANGGAYQKPTKQEEFYA______________;17;1;17>>n	ph_P18827:309
sp|Q09666|AHNK_HUMAN	sp|Q09666|AHNK_HUMAN	Q09666	__Other	Q09666	Q09666	sp|Q09666|AHNK_HUMAN Neuroblast differentiation-associated protein AHNAK OS=Homo sapiens OX=9606 GN=AHNAK PE=1 SV=2	0.999761	36.2198	3.84188e-05	144.12	110.9	+	1	PDVDLHLKGPNVKGEYDVTMPKVESEIKVPD	X;X;X;X;X;X;X;X;X;X;X;X;X;X;X;Phospho (STY);X;X;X;X;X;X;X;X;X;X;X;X;X;X;X	XXXXXXXXPPPPPPPPPPPPPPXXXXXXXXX	GPNVKGEY(1)DVTMPK	GPNVKGEY(36.22)DVT(-36.22)MPK	8	3	4.029	---	---	1850	586	836	836	3031	4185	20191112_Haura_KRAS-G12C_TMT-Batch2-Calu1-pY_run2	12300	3030	4184	20191112_Haura_KRAS-G12C_TMT-Batch2-Calu1-pY_run1	12171	3030	4184	20191112_Haura_KRAS-G12C_TMT-Batch2-Calu1-pY_run1	12171	Phosphorylation (STY)	1	GPNVKGEpYDVTMPK	8>>n	836>>n	1	1	GPNVKGEYDVTMPK	GPNVKGEpYDVTMPK;Q09666;PDVDLHLKGPNVKGEYDVTMPKVESEIKVPD;8;1;8>>n	ph_Q09666:836
sp|Q8TEW0|PARD3_HUMAN	sp|Q8TEW0|PARD3_HUMAN	Q8TEW0	__Other	Q8TEW0	Q8TEW0	sp|Q8TEW0|PARD3_HUMAN Partitioning defective 3 homolog OS=Homo sapiens OX=9606 GN=PARD3 PE=1 SV=2	0.881283	9.06842	0.000209212	122.52	91.227	---	1	YSPGEGFQSAKENPRYSSYQGSRNGYLGGHG	Phospho (STY);X;X;X;X;X;X;X;X;X;X;X;X;X;X;Phospho (STY);X;X;X;X;X;X;X;X;X;Phospho (STY);X;X;X;X;X	XXXXXXXXXXXXXXXPPPPPPPPXXXXXXXX	Y(0.881)S(0.109)S(0.009)YQGSR	Y(9.07)S(-9.07)S(-19.69)Y(-43.19)QGS(-97.71)R	1	2	1.9643	---	---	2266	850	1259	1259	10379	14656	20191113_Haura_KRAS-G12C_TMT-Batch3-H1792-pY_run2	6775	10377	14654	20191112_Haura_KRAS-G12C_TMT-Batch2-Calu1-pY_run2	6757	10378	14655	20191113_Haura_KRAS-G12C_TMT-Batch3-H1792-pY_run1	6685	Phosphorylation (STY)	1	pYSSYQGSR	1>>n	1259>>n	0.881	0.881	YSSYQGSR	pYSSYQGSR;Q8TEW0;YSPGEGFQSAKENPRYSSYQGSRNGYLGGHG;1;1;1>>n	ph_Q8TEW0:1259
sp|P20020|AT2B1_HUMAN	sp|P20020|AT2B1_HUMAN	P20020;Q01814	__Other	P20020	P20020	sp|P20020|AT2B1_HUMAN Plasma membrane calcium-transporting ATPase 1 OS=Homo sapiens OX=9606 GN=ATP2B1 PE=1 SV=4;sp|Q01814|AT2B2_HUMAN Plasma membrane calcium-transporting ATPase 2 OS=Homo sapiens OX=9606 GN=ATP2B2 PE=1 SV=2	0.999682	35.8056	1.11902e-05	154.47	128.82	+	1	IQTQIRVVNAFRSSLYEGLEKPESRSSIHNF	X;X;X;X;X;X;X;X;X;X;X;X;X;X;X;Phospho (STY);X;X;X;X;X;X;X;X;X;X;X;X;X;X;X	XXXXXXXXXXXXPPPPPPPPPPPPPXXXXXX	SSLY(1)EGLEKPESR	S(-42.55)S(-35.81)LY(35.81)EGLEKPES(-106.71)R	4	3	-0.29004	---	---	1448	357	1129	1129	7814	11040	20191112_Haura_KRAS-G12C_TMT-Batch2-Calu1-pY_run2	11941	7812	11036	20191107_Haura_KRAS-G12C_TMT-Batch1-H358-pY_run2	11940	7812	11036	20191107_Haura_KRAS-G12C_TMT-Batch1-H358-pY_run2	11940	Phosphorylation (STY)	1	SSLpYEGLEKPESR	4>>n	1129>>n	1	1	SSLYEGLEKPESR	SSLpYEGLEKPESR;P20020;Q01814;IQTQIRVVNAFRSSLYEGLEKPESRSSIHNF;4;1;4>>n	ph_P20020:1129
sp|P16144|ITB4_HUMAN	sp|P16144|ITB4_HUMAN	P16144	__Other	P16144	P16144	sp|P16144|ITB4_HUMAN Integrin beta-4 OS=Homo sapiens OX=9606 GN=ITGB4 PE=1 SV=5	0.992134	23.0671	1.3239e-13	161.61	139.25	+	1	YEMKVCAYGAQGEGPYSSLVSCRTHQEVPSE	X;X;X;X;X;X;X;X;X;X;X;X;X;X;X;Phospho (STY);X;X;X;X;X;X;X;X;X;X;X;X;X;X;X	XXXXPPPPPPPPPPPPPPPPPPPXXXXXXXX	VCAYGAQGEGPY(0.992)S(0.003)S(0.005)LVSCR	VCAY(-105.58)GAQGEGPY(23.07)S(-25.27)S(-23.07)LVS(-47.32)CR	12	3	-1.9419	---	---	1410	333	1207	1207	8943	12592	20191107_Haura_KRAS-G12C_TMT-Batch1-H358-pY_run1	13488	8943	12592	20191107_Haura_KRAS-G12C_TMT-Batch1-H358-pY_run1	13488	8943	12592	20191107_Haura_KRAS-G12C_TMT-Batch1-H358-pY_run1	13488	Phosphorylation (STY)	1	VCAYGAQGEGPpYSSLVSCR	12>>n	1207>>n	0.992	0.992	VCAYGAQGEGPYSSLVSCR	VCAYGAQGEGPpYSSLVSCR;P16144;YEMKVCAYGAQGEGPYSSLVSCRTHQEVPSE;12;1;12>>n	ph_P16144:1207
sp|P24941|CDK2_HUMAN	sp|P24941|CDK2_HUMAN	P24941;Q00526	__Other	P24941	P24941	sp|P24941|CDK2_HUMAN Cyclin-dependent kinase 2 OS=Homo sapiens OX=9606 GN=CDK2 PE=1 SV=2;sp|Q00526|CDK3_HUMAN Cyclin-dependent kinase 3 OS=Homo sapiens OX=9606 GN=CDK3 PE=1 SV=1	1	132.679	1.27189e-13	198.57	78.064	---	1;2	__MENFQKVEKIGEGTYGVVYKARNKLTGEV	X;X;X;X;X;X;X;X;X;X;X;X;X;X;X;Phospho (STY);Phospho (STY);X;X;X;X;X;X;X;X;X;X;X;X;X;X	XXXXXXXXPPPPPPPPPPPPPPXXXXXXXXX	IGEGT(1)Y(1)GVVYK	IGEGT(132.68)Y(112.65)GVVY(-112.65)K	5	3	0.35292	---	---	695	381	14	14	3960	5695	20191107_Haura_KRAS-G12C_TMT-Batch1-H358-pY_run2	16327	3959	5682	20191107_Haura_KRAS-G12C_TMT-Batch1-H358-pY_run2	16411	3959	5682	20191107_Haura_KRAS-G12C_TMT-Batch1-H358-pY_run2	16411	Phosphorylation (STY)	2	IGEGpTpYGVVYK	5,6>>n	14,15>>n	1	1	IGEGTYGVVYK	IGEGpTpYGVVYK;P24941;Q00526;__MENFQKVEKIGEGTYGVVYKARNKLTGEV;5;2;5,6>>n	ph_P24941:14
sp|Q7Z699|SPRE1_HUMAN	sp|Q7Z699|SPRE1_HUMAN	Q7Z699	__Other	Q7Z699	Q7Z699	sp|Q7Z699|SPRE1_HUMAN Sprouty-related, EVH1 domain-containing protein 1 OS=Homo sapiens OX=9606 GN=SPRED1 PE=1 SV=2	0.983515	18.1509	0.000136021	122.34	103.02	+	1	SIQFSKPDSKKSDYLYSCGDETKLSSPKDSV	X;X;X;X;X;X;X;X;X;X;X;X;X;X;X;Phospho (STY);X;X;X;X;X;X;X;X;X;X;X;X;X;X;X	XXXXXXXXXXPPPPPPPPPPPPPXXXXXXXX	KSDY(0.001)LY(0.984)S(0.015)CGDETK	KS(-45.93)DY(-28.45)LY(18.15)S(-18.15)CGDET(-75.96)K	6	3	1.9771	---	---	2123	761	294	294	4574	6578	20191107_Haura_KRAS-G12C_TMT-Batch1-H358-pY_run1	11221	4580	6584	20191112_Haura_KRAS-G12C_TMT-Batch2-Calu1-pY_run2	11171	4574	6578	20191107_Haura_KRAS-G12C_TMT-Batch1-H358-pY_run1	11221	Phosphorylation (STY)	1	KSDYLpYSCGDETK	6>>n	294>>n	0.984	0.984	KSDYLYSCGDETK	KSDYLpYSCGDETK;Q7Z699;SIQFSKPDSKKSDYLYSCGDETKLSSPKDSV;6;1;6>>n	ph_Q7Z699:294
sp|Q9HAZ1|CLK4_HUMAN	sp|Q9HAZ1|CLK4_HUMAN	Q9HAZ1	__Other	Q9HAZ1	Q9HAZ1	sp|Q9HAZ1|CLK4_HUMAN Dual specificity protein kinase CLK4 OS=Homo sapiens OX=9606 GN=CLK4 PE=1 SV=1	0.998582	30.3381	6.31949e-07	120.7	105.7	+	1	RDYRDRRYVDEYRNDYCEGYVPRHYHRDIES	X;X;X;X;X;X;X;X;X;X;X;X;X;X;X;Phospho (STY);X;X;X;X;X;X;X;X;X;X;X;X;X;X;X	XXXXXXXPPPPPPPPPPPPPPPPXXXXXXXX	YVDEYRNDY(0.999)CEGY(0.001)VPR	Y(-61.03)VDEY(-33.06)RNDY(30.34)CEGY(-30.34)VPR	9	3	-3.0743	---	---	2553	1005	80	80	10429	14710	20191112_Haura_KRAS-G12C_TMT-Batch2-Calu1-pY_run1	11984	10429	14710	20191112_Haura_KRAS-G12C_TMT-Batch2-Calu1-pY_run1	11984	10429	14710	20191112_Haura_KRAS-G12C_TMT-Batch2-Calu1-pY_run1	11984	Phosphorylation (STY)	1	YVDEYRNDpYCEGYVPR	9>>n	80>>n	0.999	0.999	YVDEYRNDYCEGYVPR	YVDEYRNDpYCEGYVPR;Q9HAZ1;RDYRDRRYVDEYRNDYCEGYVPRHYHRDIES;9;1;9>>n	ph_Q9HAZ1:80
sp|Q99569|PKP4_HUMAN	sp|Q99569|PKP4_HUMAN	Q99569	__Other	Q99569	Q99569	sp|Q99569|PKP4_HUMAN Plakophilin-4 OS=Homo sapiens OX=9606 GN=PKP4 PE=1 SV=2	0.999999	59.3448	0.000301488	159.04	118.94	+	1	HITPIYEGRTYYSPVYRSPNHGTVELQGSQT	X;X;X;X;X;X;X;X;X;X;X;X;X;X;X;Phospho (STY);X;X;X;X;X;X;X;X;X;X;X;X;X;X;X	XXXXXXXXXPPPPPPPPXXXXXXXXXXXXXX	TYYSPVY(1)R	T(-104.43)Y(-96.44)Y(-64.81)S(-59.34)PVY(59.34)R	7	2	-0.18037	---	---	2433	939	425	425	8877	12488	20191112_Haura_KRAS-G12C_TMT-Batch2-Calu1-pY_run2	11810	8873	12482	20191107_Haura_KRAS-G12C_TMT-Batch1-H358-pY_run2	11792	8873	12482	20191107_Haura_KRAS-G12C_TMT-Batch1-H358-pY_run2	11792	Phosphorylation (STY)	1	TYYSPVpYR	7>>n	425>>n	1	1	TYYSPVYR	TYYSPVpYR;Q99569;HITPIYEGRTYYSPVYRSPNHGTVELQGSQT;7;1;7>>n	ph_Q99569:425
sp|P35367|HRH1_HUMAN	sp|P35367|HRH1_HUMAN	P35367	__Other	P35367	P35367	sp|P35367|HRH1_HUMAN Histamine H1 receptor OS=Homo sapiens OX=9606 GN=HRH1 PE=1 SV=1	1	43.8144	0.00144975	89.369	50.551	+	1	DIVHMQAAAEGSSRDYVAVNRSHGQLKTDEQ	X;X;X;X;X;X;X;X;X;X;X;X;X;X;X;Phospho (STY);X;X;X;X;X;X;X;X;X;X;X;X;X;X;X	XXXXXXXXXXXXXXPPPPPPPXXXXXXXXXX	DY(1)VAVNR	DY(43.81)VAVNR	2	2	1.3479	---	---	1556	417	321	321	1701	2299	20191113_Haura_KRAS-G12C_TMT-Batch3-H1792-pY_run2	8886	1696	2291	20191107_Haura_KRAS-G12C_TMT-Batch1-H358-pY_run1	9092	1696	2291	20191107_Haura_KRAS-G12C_TMT-Batch1-H358-pY_run1	9092	Phosphorylation (STY)	1	DpYVAVNR	2,x	321,x	1	1	DYVAVNR	DpYVAVNR;P35367;DIVHMQAAAEGSSRDYVAVNRSHGQLKTDEQ;2;1;2,x	ph_P35367:321
sp|Q09666|AHNK_HUMAN	sp|Q09666|AHNK_HUMAN	Q09666	__Other	Q09666	Q09666	sp|Q09666|AHNK_HUMAN Neuroblast differentiation-associated protein AHNAK OS=Homo sapiens OX=9606 GN=AHNAK PE=1 SV=2	0.999031	30.2242	0	387.47	362.83	---	1;2	KFGTFGGLGSKSKGHYEVTGSDDETGKLQGS	X;X;X;X;X;X;X;X;X;X;X;X;X;X;X;Phospho (STY);X;X;Phospho (STY);X;Phospho (STY);X;X;X;X;X;X;X;X;X;X	XXXXXXXXXXXPPPPPPPPPPPPPPPPPPPP	S(0.001)KGHY(0.999)EVTGSDDETGKLQGSGVSLASK	S(-30.22)KGHY(30.22)EVT(-46.92)GS(-107.15)DDET(-193.4)GKLQGS(-252.51)GVS(-302.99)LAS(-346.25)K	5	4	2.5284	---	---	1849	586	5836	5836	7307	10286	20191112_Haura_KRAS-G12C_TMT-Batch2-Calu1-pY_run1	11296	7307	10286	20191112_Haura_KRAS-G12C_TMT-Batch2-Calu1-pY_run1	11296	7307	10286	20191112_Haura_KRAS-G12C_TMT-Batch2-Calu1-pY_run1	11296	Phosphorylation (STY)	1	SKGHpYEVTGSDDETGKLQGSGVSLASK	5>>n	5836>>n	0.999	0.999	SKGHYEVTGSDDETGKLQGSGVSLASK	SKGHpYEVTGSDDETGKLQGSGVSLASK;Q09666;KFGTFGGLGSKSKGHYEVTGSDDETGKLQGS;5;1;5>>n	ph_Q09666:5836
sp|O95235|KI20A_HUMAN	sp|O95235|KI20A_HUMAN	O95235	__Other	O95235	O95235	sp|O95235|KI20A_HUMAN Kinesin-like protein KIF20A OS=Homo sapiens OX=9606 GN=KIF20A PE=1 SV=1	0.985229	18.3151	4.20498e-05	98.676	88.191	---	1	LPRTPTCQSSTDCSPYARILRSRRSPLLKSG	X;X;X;X;X;X;X;X;X;X;X;X;X;X;X;Phospho (STY);X;X;X;X;X;X;X;X;X;X;X;X;X;X;X	XXXPPPPPPPPPPPPPPPXXXXXXXXXXXXX	TPTCQSSTDCS(0.015)PY(0.985)AR	T(-45.97)PT(-45.97)CQS(-45.97)S(-40.55)T(-40.55)DCS(-18.32)PY(18.32)AR	13	2	-1.1536	---	---	1212	222	869	869	8561	12045	20191112_Haura_KRAS-G12C_TMT-Batch2-Calu1-pY_run1	7879	8557	12041	20191107_Haura_KRAS-G12C_TMT-Batch1-H358-pY_run1	8047	8557	12041	20191107_Haura_KRAS-G12C_TMT-Batch1-H358-pY_run1	8047	Phosphorylation (STY)	1	TPTCQSSTDCSPpYAR	13>>n	869>>n	0.985	0.985	TPTCQSSTDCSPYAR	TPTCQSSTDCSPpYAR;O95235;LPRTPTCQSSTDCSPYARILRSRRSPLLKSG;13;1;13>>n	ph_O95235:869
sp|P11171|41_HUMAN	sp|P11171|41_HUMAN	P11171	__Other	P11171	P11171	sp|P11171|41_HUMAN Protein 4.1 OS=Homo sapiens OX=9606 GN=EPB41 PE=1 SV=4	1	138.975	1.49042e-27	207.6	150.55	+	1	RMRKKKRERLDGENIYIRHSNLMLEDLDKSQ	X;X;X;X;X;X;X;X;X;X;X;X;X;X;X;Phospho (STY);X;X;X;X;X;X;X;X;X;X;X;X;X;X;X	XXXXXXXPPPPPPPPPPPXXXXXXXXXXXXX	LDGENIY(1)IR	LDGENIY(138.98)IR	7	2	-0.097894	---	---	1370	303	660	660	4848	6956	20191113_Haura_KRAS-G12C_TMT-Batch3-H1792-pY_run2	14205	2117	2858	20191107_Haura_KRAS-G12C_TMT-Batch1-H358-pY_run1	11705	2121	2867	20191112_Haura_KRAS-G12C_TMT-Batch2-Calu1-pY_run1	11473	Phosphorylation (STY)	1	LDGENIpYIR	7,x	660,x	1	1	LDGENIYIR	LDGENIpYIR;P11171;RMRKKKRERLDGENIYIRHSNLMLEDLDKSQ;7;1;7,x	ph_P11171:660
sp|Q05397|FAK1_HUMAN	sp|Q05397|FAK1_HUMAN	Q05397	__Other	Q05397	Q05397	sp|Q05397|FAK1_HUMAN Focal adhesion kinase 1 OS=Homo sapiens OX=9606 GN=PTK2 PE=1 SV=2	0.709328	3.95826	0.00428734	78.496	58.167	---	1;2	CVKLGDFGLSRYMEDSTYYKASKGKLPIKWM	X;X;X;X;X;X;X;X;X;X;X;X;Oxidation (M);X;X;Phospho (STY);Phospho (STY);Phospho (STY);Phospho (STY);X;X;X;X;X;X;X;X;X;X;X;X	XXXXXXXXXXXPPPPPPPPPPPPXXXXXXXX	Y(0.285)MEDS(0.709)T(0.004)Y(0.001)Y(0.001)K	Y(-3.96)MEDS(3.96)T(-22.79)Y(-28.92)Y(-28.92)K	5	3	0.85944	---	---	245	567	574	574	10175	14399	20191113_Haura_KRAS-G12C_TMT-Batch3-H1792-pY_run2	12735	10178	14406	20191107_Haura_KRAS-G12C_TMT-Batch1-H358-pY_run1	13533	10178	14406	20191107_Haura_KRAS-G12C_TMT-Batch1-H358-pY_run1	13533	Phosphorylation (STY)	1	YMEDpSTYYK	5>>n	574>>n	0.709	0.709	YMEDSTYYK	YMEDpSTYYK;Q05397;CVKLGDFGLSRYMEDSTYYKASKGKLPIKWM;5;1;5>>n	ph_Q05397:574
sp|Q13523|PRP4B_HUMAN	sp|Q13523|PRP4B_HUMAN	Q13523	__Other	Q13523	Q13523	sp|Q13523|PRP4B_HUMAN Serine/threonine-protein kinase PRP4 homolog OS=Homo sapiens OX=9606 GN=PRPF4B PE=1 SV=3	0.999919	43.8468	3.6381e-189	329.35	306.02	+	1;2	DFGSASHVADNDITPYLVSRFYRAPEIIIGK	X;X;X;Phospho (STY);X;Phospho (STY);X;X;X;X;X;X;X;X;X;Phospho (STY);X;X;X;X;X;X;X;X;X;X;X;X;X;X;X	PPPPPPPPPPPPPPPPPPPPXXXXXXXXXXX	LCDFGSASHVADNDITPY(1)LVSR	LCDFGS(-237.56)AS(-217.02)HVADNDIT(-43.85)PY(43.85)LVS(-44.02)R	18	3	-2.2666	---	---	1900	616	849	849	4810	6866	20191107_Haura_KRAS-G12C_TMT-Batch1-H358-pY_run1	15995	4828	6914	20191113_Haura_KRAS-G12C_TMT-Batch3-H1792-pY_run1	15917	4828	6914	20191113_Haura_KRAS-G12C_TMT-Batch3-H1792-pY_run1	15917	Phosphorylation (STY)	1	LCDFGSASHVADNDITPpYLVSR	18>>n	849>>n	1	1	LCDFGSASHVADNDITPYLVSR	LCDFGSASHVADNDITPpYLVSR;Q13523;DFGSASHVADNDITPYLVSRFYRAPEIIIGK;18;1;18>>n	ph_Q13523:849
sp|P06748|NPM_HUMAN	sp|P06748|NPM_HUMAN	P06748	__Other	P06748	P06748	sp|P06748|NPM_HUMAN Nucleophosmin OS=Homo sapiens OX=9606 GN=NPM1 PE=1 SV=2	1	76.6652	2.00799e-36	155.28	134.83	---	1	HISGQHLVAVEEDAESEDEEEEDVKLLSISG	X;X;X;X;X;X;X;X;X;X;X;X;X;X;X;Phospho (STY);X;X;X;X;X;X;X;X;X;X;X;X;X;X;X	PPPPPPPPPPPPPPPPPPPPPPPPPXXXXXX	CGSGPVHISGQHLVAVEEDAES(1)EDEEEEDVK	CGS(-78)GPVHIS(-76.67)GQHLVAVEEDAES(76.67)EDEEEEDVK	22	4	-0.21897	---	---	124	270	125	125	1040	1451	20191113_Haura_KRAS-G12C_TMT-Batch3-H1792-pY_run1	12707	1040	1451	20191113_Haura_KRAS-G12C_TMT-Batch3-H1792-pY_run1	12707	1040	1451	20191113_Haura_KRAS-G12C_TMT-Batch3-H1792-pY_run1	12707	Phosphorylation (STY)	1	CGSGPVHISGQHLVAVEEDAEpSEDEEEEDVK	22>>n	125>>n	1	1	CGSGPVHISGQHLVAVEEDAESEDEEEEDVK	CGSGPVHISGQHLVAVEEDAEpSEDEEEEDVK;P06748;HISGQHLVAVEEDAESEDEEEEDVKLLSISG;22;1;22>>n	ph_P06748:125
sp|P05023|AT1A1_HUMAN	sp|P05023|AT1A1_HUMAN	P05023	__Other	P05023	P05023	sp|P05023|AT1A1_HUMAN Sodium/potassium-transporting ATPase subunit alpha-1 OS=Homo sapiens OX=9606 GN=ATP1A1 PE=1 SV=1	0.999874	38.9985	8.11305e-05	180.7	24.969	+	1	SMDDHKLSLDELHRKYGTDLSRGLTSARAAE	X;X;X;X;X;X;X;X;X;X;X;X;X;X;X;Phospho (STY);X;X;X;X;X;X;X;X;X;X;X;X;X;X;X	XXXXXXXXXXXXXXPPPPPPPPXXXXXXXXX	Y(1)GTDLSR	Y(39)GT(-39)DLS(-112.28)R	1	2	0.93683	---	---	1262	258	55	55	9989	14151	20191112_Haura_KRAS-G12C_TMT-Batch2-Calu1-pY_run1	8354	9990	14153	20191112_Haura_KRAS-G12C_TMT-Batch2-Calu1-pY_run2	8374	4761	6796	20191112_Haura_KRAS-G12C_TMT-Batch2-Calu1-pY_run1	8146	Phosphorylation (STY)	1	pYGTDLSR	1>>n	55>>n	1	1	YGTDLSR	pYGTDLSR;P05023;SMDDHKLSLDELHRKYGTDLSRGLTSARAAE;1;1;1>>n	ph_P05023:55
sp|Q96PD2|DCBD2_HUMAN	sp|Q96PD2|DCBD2_HUMAN	Q96PD2	__Other	Q96PD2	Q96PD2	sp|Q96PD2|DCBD2_HUMAN Discoidin, CUB and LCCL domain-containing protein 2 OS=Homo sapiens OX=9606 GN=DCBLD2 PE=1 SV=1	0.999999	60.4582	6.29876e-27	213.59	126.97	+	1;2;3	TLLSRTDSCSSAQAQYDTPKAGKPGLPAPDE	X;X;X;X;X;X;X;Phospho (STY);X;Phospho (STY);X;X;X;X;X;Phospho (STY);X;X;X;X;X;X;X;X;X;X;X;X;X;X;X	XXXXXPPPPPPPPPPPPPPPXXXXXXXXXXX	TDSCSSAQAQY(1)DTPK	T(-139.05)DS(-139.41)CS(-126.4)S(-118.75)AQAQY(60.46)DT(-60.46)PK	11	3	1.199	---	---	2383	924	732	732	8268	11664	20191107_Haura_KRAS-G12C_TMT-Batch1-H358-pY_run2	9106	8271	11669	20191112_Haura_KRAS-G12C_TMT-Batch2-Calu1-pY_run1	8953	8271	11669	20191112_Haura_KRAS-G12C_TMT-Batch2-Calu1-pY_run1	8953	Phosphorylation (STY)	1	TDSCSSAQAQpYDTPK	11>>n	732>>n	1	1	TDSCSSAQAQYDTPK	TDSCSSAQAQpYDTPK;Q96PD2;TLLSRTDSCSSAQAQYDTPKAGKPGLPAPDE;11;1;11>>n	ph_Q96PD2:732
sp|Q16625|OCLN_HUMAN	sp|Q16625|OCLN_HUMAN	Q16625	__Other	Q16625	Q16625	sp|Q16625|OCLN_HUMAN Occludin OS=Homo sapiens OX=9606 GN=OCLN PE=1 SV=1	0.998516	28.3389	1.0097e-22	215.08	167.5	---	1	ELPLTSPVDDFRQPRYSSGGNFETPSKRAPA	X;X;X;X;X;X;X;X;X;X;X;X;X;X;X;Phospho (STY);X;X;X;X;X;X;X;X;X;X;X;X;X;X;X	XXXXXXXXXXXXXXXPPPPPPPPPPPPPXXX	Y(0.999)S(0.001)SGGNFETPSK	Y(28.34)S(-28.34)S(-46.86)GGNFET(-162.59)PS(-182.19)K	1	2	3.5109	---	---	2011	677	368	368	10366	14641	20191112_Haura_KRAS-G12C_TMT-Batch2-Calu1-pY_run1	11024	10366	14641	20191112_Haura_KRAS-G12C_TMT-Batch2-Calu1-pY_run1	11024	10366	14641	20191112_Haura_KRAS-G12C_TMT-Batch2-Calu1-pY_run1	11024	Phosphorylation (STY)	1	pYSSGGNFETPSK	1>>n	368>>n	0.999	0.999	YSSGGNFETPSK	pYSSGGNFETPSK;Q16625;ELPLTSPVDDFRQPRYSSGGNFETPSKRAPA;1;1;1>>n	ph_Q16625:368
sp|P18827|SDC1_HUMAN	sp|P18827|SDC1_HUMAN	P18827	__Other	P18827	P18827	sp|P18827|SDC1_HUMAN Syndecan-1 OS=Homo sapiens OX=9606 GN=SDC1 PE=1 SV=3	0.999975	46.0245	1.74274e-26	193.77	166.56	+	1	GSYSLEEPKQANGGAYQKPTKQEEFYA____	X;Phospho (STY);Phospho (STY);X;X;X;X;X;X;X;X;X;X;X;X;Phospho (STY);X;X;X;X;X;X;X;X;X;X;X;X;X;X;X	XXXXXXXXXPPPPPPPPPPPPPPPPPPXXXX	QANGGAY(1)QKPTKQEEFYA	QANGGAY(46.02)QKPT(-46.02)KQEEFY(-65.24)A	7	4	0.6961	---	---	1436	351	299	299	6204	8816	20191112_Haura_KRAS-G12C_TMT-Batch2-Calu1-pY_run1	11527	6202	8812	20191107_Haura_KRAS-G12C_TMT-Batch1-H358-pY_run2	11687	6202	8812	20191107_Haura_KRAS-G12C_TMT-Batch1-H358-pY_run2	11687	Phosphorylation (STY)	1	QANGGApYQKPTKQEEFYA	7>>n	299>>n	1	1	QANGGAYQKPTKQEEFYA	QANGGApYQKPTKQEEFYA;P18827;GSYSLEEPKQANGGAYQKPTKQEEFYA____;7;1;7>>n	ph_P18827:299
sp|O95297|MPZL1_HUMAN	sp|O95297|MPZL1_HUMAN	O95297	__Other	O95297	O95297	sp|O95297|MPZL1_HUMAN Myelin protein zero-like protein 1 OS=Homo sapiens OX=9606 GN=MPZL1 PE=1 SV=1	1	121.324	1.06476e-69	275.33	210.02	+	1;2	GGHHSDKINKSESVVYADIRKN_________	X;X;X;X;X;X;X;X;X;X;X;X;Phospho (STY);X;X;Phospho (STY);X;X;X;X;X;X;X;X;X;X;X;X;X;X;X	XXXXXXXPPPPPPPPPPPPPXXXXXXXXXXX	SESVVY(1)ADIR	S(-161.88)ES(-121.32)VVY(121.32)ADIR	6	2	-0.51711	---	---	1215	224	263	263	7087	9998	20191113_Haura_KRAS-G12C_TMT-Batch3-H1792-pY_run2	12113	7084	9986	20191112_Haura_KRAS-G12C_TMT-Batch2-Calu1-pY_run2	12250	7084	9986	20191112_Haura_KRAS-G12C_TMT-Batch2-Calu1-pY_run2	12250	Phosphorylation (STY)	1	SESVVpYADIR	6>>n	263>>n	1	1	SESVVYADIR	SESVVpYADIR;O95297;GGHHSDKINKSESVVYADIRKN_________;6;1;6>>n	ph_O95297:263
sp|Q09666|AHNK_HUMAN	sp|Q09666|AHNK_HUMAN	Q09666	__Other	Q09666	Q09666	sp|Q09666|AHNK_HUMAN Neuroblast differentiation-associated protein AHNAK OS=Homo sapiens OX=9606 GN=AHNAK PE=1 SV=2	0.999937	42.0358	5.62284e-12	173.27	131.06	+	1	PDVGLHLKGPKMKGDYDVTVPKVEGEIKAPD	X;X;X;X;X;X;X;X;X;X;X;Oxidation (M);X;X;X;Phospho (STY);X;X;X;X;X;X;X;X;X;X;X;X;X;X;X	XXXXXXXXXXXPPPPPPPPPPPPPPPPPXXX	MKGDY(1)DVTVPK	MKGDY(42.04)DVT(-42.04)VPK	5	3	4.2136	---	---	1851	586	1469	1469	5545	7966	20191112_Haura_KRAS-G12C_TMT-Batch2-Calu1-pY_run1	12157	5555	7978	20191107_Haura_KRAS-G12C_TMT-Batch1-H358-pY_run1	13712	5555	7978	20191107_Haura_KRAS-G12C_TMT-Batch1-H358-pY_run1	13712	Phosphorylation (STY)	1	MKGDpYDVTVPK	5>>n	1469>>n	1	1	MKGDYDVTVPK	MKGDpYDVTVPK;Q09666;PDVGLHLKGPKMKGDYDVTVPKVEGEIKAPD;5;1;5>>n	ph_Q09666:1469
sp|Q6ZVM7|TM1L2_HUMAN	sp|Q6ZVM7|TM1L2_HUMAN	Q6ZVM7	__Other	Q6ZVM7	Q6ZVM7	sp|Q6ZVM7|TM1L2_HUMAN TOM1-like protein 2 OS=Homo sapiens OX=9606 GN=TOM1L2 PE=1 SV=1	0.510978	0.809527	1.57961e-13	139.83	115.53	---	1	AQTRGNSLAEQRKTVTYEDPQAVGGLASALD	X;X;X;X;X;X;X;X;X;X;X;X;X;X;X;Phospho (STY);X;X;X;X;X;X;X;X;X;X;X;X;X;X;X	XXXXXXXXXXXXPPPPPPPPPPPPPPPPPPP	KT(0.065)VT(0.511)Y(0.424)EDPQAVGGLASALDNR	KT(-8.96)VT(0.81)Y(-0.81)EDPQAVGGLAS(-111.88)ALDNR	4	3	0.40843	---	---	828	743	403	403	4690	6720	20191107_Haura_KRAS-G12C_TMT-Batch1-H358-pY_run2	14608	4690	6720	20191107_Haura_KRAS-G12C_TMT-Batch1-H358-pY_run2	14608	4690	6720	20191107_Haura_KRAS-G12C_TMT-Batch1-H358-pY_run2	14608	Phosphorylation (STY)	1	KTVpTYEDPQAVGGLASALDNR	4>n	403>n	0.511	0.511	KTVTYEDPQAVGGLASALDNR	KTVpTYEDPQAVGGLASALDNR;Q6ZVM7;AQTRGNSLAEQRKTVTYEDPQAVGGLASALD;4;1;4>n	ph_Q6ZVM7:403
sp|Q6ZS17|RIPR1_HUMAN	sp|Q6ZS17|RIPR1_HUMAN	Q6ZS17	__Other	Q6ZS17	Q6ZS17	sp|Q6ZS17|RIPR1_HUMAN Rho family-interacting cell polarization regulator 1 OS=Homo sapiens OX=9606 GN=RIPOR1 PE=1 SV=1	0.985479	18.7736	2.52587e-05	119.32	103.93	+	1	SSVNKASTVTKRFSTYSQSPPDTPSLREQAF	X;X;X;X;X;X;X;X;X;X;X;X;X;X;X;Phospho (STY);X;X;X;X;X;X;X;X;X;X;X;X;X;X;X	XXXXXXXXXXXXPPPPPPPPPPPPPPPXXXX	FST(0.001)Y(0.985)S(0.013)QSPPDTPSLR	FS(-37.7)T(-28.87)Y(18.77)S(-18.77)QS(-53.03)PPDT(-95.47)PS(-101.22)LR	4	3	-1.2037	---	---	2101	741	348	348	2574	3479	20191112_Haura_KRAS-G12C_TMT-Batch2-Calu1-pY_run1	13530	2574	3479	20191112_Haura_KRAS-G12C_TMT-Batch2-Calu1-pY_run1	13530	2574	3479	20191112_Haura_KRAS-G12C_TMT-Batch2-Calu1-pY_run1	13530	Phosphorylation (STY)	1	FSTpYSQSPPDTPSLR	4>>n	348>>n	0.985	0.985	FSTYSQSPPDTPSLR	FSTpYSQSPPDTPSLR;Q6ZS17;SSVNKASTVTKRFSTYSQSPPDTPSLREQAF;4;1;4>>n	ph_Q6ZS17:348
sp|P68366|TBA4A_HUMAN	sp|P68366|TBA4A_HUMAN	P0DPH7;P0DPH8;P68363;P68366;Q6PEY2;Q71U36;Q9BQE3;Q9H853;Q9NY65	__Other	P68366	P68366	sp|P68366|TBA4A_HUMAN Tubulin alpha-4A chain OS=Homo sapiens OX=9606 GN=TUBA4A PE=1 SV=1;sp|Q9BQE3|TBA1C_HUMAN Tubulin alpha-1C chain OS=Homo sapiens OX=9606 GN=TUBA1C PE=1 SV=1;sp|P68363|TBA1B_HUMAN Tubulin alpha-1B chain OS=Homo sapiens OX=9606 GN=TUBA1B	0.988723	20.97	2.58143e-18	192.78	151.04	+	1	IYDICRRNLDIERPTYTNLNRLISQIVSSIT	X;X;X;X;X;X;X;X;X;X;X;X;X;X;X;Phospho (STY);X;X;X;X;X;X;X;X;X;X;X;X;X;X;X	XXXXXXXPPPPPPPPPPPPPPXXXXXXXXXX	NLDIERPT(0.003)Y(0.989)T(0.008)NLNR	NLDIERPT(-24.68)Y(20.97)T(-20.97)NLNR	9	3	-0.05617	---	---	1734	528	224	224	5821	8346	20191112_Haura_KRAS-G12C_TMT-Batch2-Calu1-pY_run2	11835	5821	8346	20191112_Haura_KRAS-G12C_TMT-Batch2-Calu1-pY_run2	11835	5821	8346	20191112_Haura_KRAS-G12C_TMT-Batch2-Calu1-pY_run2	11835	Phosphorylation (STY)	1	NLDIERPTpYTNLNR	9>>n	224>>n	0.989	0.989	NLDIERPTYTNLNR	NLDIERPTpYTNLNR;P0DPH7;P0DPH8;P68363;P68366;Q6PEY2;Q71U36;Q9BQE3;Q9H853;Q9NY65;IYDICRRNLDIERPTYTNLNRLISQIVSSIT;9;1;9>>n	ph_P68366:224
sp|Q8TEW0|PARD3_HUMAN	sp|Q8TEW0|PARD3_HUMAN	Q8TEW0	__Other	Q8TEW0	Q8TEW0	sp|Q8TEW0|PARD3_HUMAN Partitioning defective 3 homolog OS=Homo sapiens OX=9606 GN=PARD3 PE=1 SV=2	1	68.2892	3.00309e-06	162.36	139.62	+	1	SITSRDVTIGGSAPIYVKNILPRGAAIQDGR	X;X;X;X;X;X;X;X;X;X;X;X;X;X;X;Phospho (STY);X;X;X;X;X;X;X;X;X;X;X;X;X;X;X	XXXXXPPPPPPPPPPPPPXXXXXXXXXXXXX	DVTIGGSAPIY(1)VK	DVT(-93.91)IGGS(-68.29)APIY(68.29)VK	11	3	1.3713	---	---	2255	850	489	489	1641	2228	20191112_Haura_KRAS-G12C_TMT-Batch2-Calu1-pY_run1	15678	1644	2231	20191113_Haura_KRAS-G12C_TMT-Batch3-H1792-pY_run1	15546	1644	2231	20191113_Haura_KRAS-G12C_TMT-Batch3-H1792-pY_run1	15546	Phosphorylation (STY)	1	DVTIGGSAPIpYVK	11>>n	489>>n	1	1	DVTIGGSAPIYVK	DVTIGGSAPIpYVK;Q8TEW0;SITSRDVTIGGSAPIYVKNILPRGAAIQDGR;11;1;11>>n	ph_Q8TEW0:489
sp|Q9Y2H5|PKHA6_HUMAN	sp|Q9Y2H5|PKHA6_HUMAN	Q9Y2H5	__Other	Q9Y2H5	Q9Y2H5	sp|Q9Y2H5|PKHA6_HUMAN Pleckstrin homology domain-containing family A member 6 OS=Homo sapiens OX=9606 GN=PLEKHA6 PE=1 SV=4	0.997786	27.1654	0.00504282	77.527	45.888	---	2	SQGSYSRARIYSPVRSPSARFERLPPRSEDI	X;X;X;X;X;X;X;X;X;X;Phospho (STY);X;X;X;X;Phospho (STY);X;X;X;X;X;X;X;X;X;X;X;X;X;X;X	XXXXXXXXXPPPPPPPPPPPXXXXXXXXXXX	IY(0.952)S(0.048)PVRS(0.998)PS(0.002)AR	IY(12.97)S(-12.97)PVRS(27.17)PS(-27.17)AR	7	3	-0.92242	---	---	586	1116	476	476	4211	6132	20191107_Haura_KRAS-G12C_TMT-Batch1-H358-pY_run2	10835	4214	6135	20191112_Haura_KRAS-G12C_TMT-Batch2-Calu1-pY_run2	10811	4214	6135	20191112_Haura_KRAS-G12C_TMT-Batch2-Calu1-pY_run2	10811	Phosphorylation (STY)	2	IpYSPVRpSPSAR	7,2>>n	476,471>>n	0.998	0.95	IYSPVRSPSAR	IpYSPVRpSPSAR;Q9Y2H5;SQGSYSRARIYSPVRSPSARFERLPPRSEDI;7;2;7,2>>n	ph_Q9Y2H5:476
sp|P56945|BCAR1_HUMAN	sp|P56945|BCAR1_HUMAN	P56945	__Other	P56945	P56945	sp|P56945|BCAR1_HUMAN Breast cancer anti-estrogen resistance protein 1 OS=Homo sapiens OX=9606 GN=BCAR1 PE=1 SV=2	1	96.9927	7.44018e-08	139.6	117.97	---	1	YDIPRHLLAPGPQDIYDVPPVRGLLPSQYGQ	Phospho (STY);X;X;X;X;X;X;X;X;X;X;X;X;X;X;Phospho (STY);X;X;X;X;X;X;X;X;X;X;X;X;X;X;X	XXXXXPPPPPPPPPPPPPPPPPXXXXXXXXX	HLLAPGPQDIY(1)DVPPVR	HLLAPGPQDIY(96.99)DVPPVR	11	3	-1.166	---	---	1684	497	249	249	3539	4837	20191113_Haura_KRAS-G12C_TMT-Batch3-H1792-pY_run2	14473	3536	4826	20191112_Haura_KRAS-G12C_TMT-Batch2-Calu1-pY_run1	14516	3536	4826	20191112_Haura_KRAS-G12C_TMT-Batch2-Calu1-pY_run1	14516	Phosphorylation (STY)	1	HLLAPGPQDIpYDVPPVR	11,x	249,x	1	1	HLLAPGPQDIYDVPPVR	HLLAPGPQDIpYDVPPVR;P56945;YDIPRHLLAPGPQDIYDVPPVRGLLPSQYGQ;11;1;11,x	ph_P56945:249
sp|O14672|ADA10_HUMAN	sp|O14672|ADA10_HUMAN	O14672	__Other	O14672	O14672	sp|O14672|ADA10_HUMAN Disintegrin and metalloproteinase domain-containing protein 10 OS=Homo sapiens OX=9606 GN=ADAM10 PE=1 SV=1	0.98676	18.7234	0.00108244	83.948	60.391	+	1	PQPIQQPQRQRPRESYQMGHMRR________	X;X;X;X;X;X;X;X;X;X;X;X;X;X;X;Phospho (STY);X;Oxidation (M);X;X;X;X;X;X;X;X;X;X;X;X;X	XXXXXXXXXXXXXPPPPPPPPPXXXXXXXXX	ES(0.013)Y(0.987)QMGHMR	ES(-18.72)Y(18.72)QMGHMR	3	3	-0.28966	---	---	1073	138	741	741	2221	2987	20191112_Haura_KRAS-G12C_TMT-Batch2-Calu1-pY_run1	7287	2221	2987	20191112_Haura_KRAS-G12C_TMT-Batch2-Calu1-pY_run1	7287	2221	2987	20191112_Haura_KRAS-G12C_TMT-Batch2-Calu1-pY_run1	7287	Phosphorylation (STY)	1	ESpYQMGHMR	3>>n	741>>n	0.987	0.987	ESYQMGHMR	ESpYQMGHMR;O14672;PQPIQQPQRQRPRESYQMGHMRR________;3;1;3>>n	ph_O14672:741
sp|Q494U1|PKHN1_HUMAN	sp|Q494U1|PKHN1_HUMAN	Q494U1	__Other	Q494U1	Q494U1	sp|Q494U1|PKHN1_HUMAN Pleckstrin homology domain-containing family N member 1 OS=Homo sapiens OX=9606 GN=PLEKHN1 PE=1 SV=3	0.999904	40.1916	0.000177463	94.023	77.821	+	1	PASDPRSCSSGPAGPYLLSKKGALQSRAAQR	X;X;X;X;X;X;X;X;X;X;X;X;X;X;X;Phospho (STY);X;X;X;X;X;X;X;X;X;X;X;X;X;X;X	XXXXXXPPPPPPPPPPPPPPXXXXXXXXXXX	SCSSGPAGPY(1)LLSK	S(-73.86)CS(-74.09)S(-69.04)GPAGPY(40.19)LLS(-40.19)K	10	3	3.4432	---	---	2021	685	518	518	6922	9746	20191112_Haura_KRAS-G12C_TMT-Batch2-Calu1-pY_run2	14111	6923	9747	20191113_Haura_KRAS-G12C_TMT-Batch3-H1792-pY_run1	13891	6922	9746	20191112_Haura_KRAS-G12C_TMT-Batch2-Calu1-pY_run2	14111	Phosphorylation (STY)	1	SCSSGPAGPpYLLSK	10>>n	518>>n	1	1	SCSSGPAGPYLLSK	SCSSGPAGPpYLLSK;Q494U1;PASDPRSCSSGPAGPYLLSKKGALQSRAAQR;10;1;10>>n	ph_Q494U1:518
sp|Q93052|LPP_HUMAN	sp|Q93052|LPP_HUMAN	Q93052	__Other	Q93052	Q93052	sp|Q93052|LPP_HUMAN Lipoma-preferred partner OS=Homo sapiens OX=9606 GN=LPP PE=1 SV=1	0.99354	21.8694	2.68085e-36	229.16	205.31	+	1	GYGYAPNQGRYYEGYYAAGPGYGGRNDSDPT	X;X;X;X;X;X;X;X;X;X;X;X;X;X;X;Phospho (STY);X;X;X;X;X;X;X;X;X;X;X;X;X;X;Phospho (STY)	XXXXXXXXXXPPPPPPPPPPPPPPPXXXXXX	YYEGY(0.006)Y(0.994)AAGPGYGGR	Y(-79.12)Y(-79.12)EGY(-21.87)Y(21.87)AAGPGY(-120.46)GGR	6	2	-0.45957	---	---	2326	889	301	301	10542	14903	20191112_Haura_KRAS-G12C_TMT-Batch2-Calu1-pY_run2	13184	10542	14903	20191112_Haura_KRAS-G12C_TMT-Batch2-Calu1-pY_run2	13184	10542	14903	20191112_Haura_KRAS-G12C_TMT-Batch2-Calu1-pY_run2	13184	Phosphorylation (STY)	1	YYEGYpYAAGPGYGGR	6>>n	301>>n	0.994	0.994	YYEGYYAAGPGYGGR	YYEGYpYAAGPGYGGR;Q93052;GYGYAPNQGRYYEGYYAAGPGYGGRNDSDPT;6;1;6>>n	ph_Q93052:301
sp|P08621|RU17_HUMAN	sp|P08621|RU17_HUMAN	P08621	__Other	P08621	P08621	sp|P08621|RU17_HUMAN U1 small nuclear ribonucleoprotein 70 kDa OS=Homo sapiens OX=9606 GN=SNRNP70 PE=1 SV=2	1	51.9267	3.85092e-05	155.42	113.42	+	1	NYDTTESKLRREFEVYGPIKRIHMVYSKRSG	X;X;X;X;X;X;X;X;X;X;X;X;X;X;X;Phospho (STY);X;X;X;X;X;X;X;X;X;X;X;X;X;X;X	XXXXXXXXXXPPPPPPPPPPPXXXXXXXXXX	REFEVY(1)GPIKR	REFEVY(51.93)GPIKR	6	4	1.5818	---	---	1337	284	126	126	6699	9456	20191113_Haura_KRAS-G12C_TMT-Batch3-H1792-pY_run1	11064	1863	2518	20191113_Haura_KRAS-G12C_TMT-Batch3-H1792-pY_run2	13071	1863	2518	20191113_Haura_KRAS-G12C_TMT-Batch3-H1792-pY_run2	13071	Phosphorylation (STY)	1	REFEVpYGPIKR	6,x	126,x	1	1	REFEVYGPIKR	REFEVpYGPIKR;P08621;NYDTTESKLRREFEVYGPIKRIHMVYSKRSG;6;1;6,x	ph_P08621:126
sp|Q96RV3|PCX1_HUMAN	sp|Q96RV3|PCX1_HUMAN	Q96RV3	__Other	Q96RV3	Q96RV3	sp|Q96RV3|PCX1_HUMAN Pecanex-like protein 1 OS=Homo sapiens OX=9606 GN=PCNX1 PE=1 SV=2	1	54.1572	0.00782244	76.221	59.968	+	1	GKKRASSFDSSRHRDYVCFRGVSGTKPHSAI	X;X;X;X;X;X;X;X;X;X;X;X;X;X;X;Phospho (STY);X;X;X;X;X;X;X;X;X;X;X;X;X;X;X	XXXXXXXXXXXXPPPPPPPPXXXXXXXXXXX	HRDY(1)VCFR	HRDY(54.16)VCFR	4	3	-2.3965	---	---	2409	933	580	580	3562	4864	20191113_Haura_KRAS-G12C_TMT-Batch3-H1792-pY_run2	7431	3561	4863	20191112_Haura_KRAS-G12C_TMT-Batch2-Calu1-pY_run2	7392	3561	4863	20191112_Haura_KRAS-G12C_TMT-Batch2-Calu1-pY_run2	7392	Phosphorylation (STY)	1	HRDpYVCFR	4,x	580,x	1	1	HRDYVCFR	HRDpYVCFR;Q96RV3;GKKRASSFDSSRHRDYVCFRGVSGTKPHSAI;4;1;4,x	ph_Q96RV3:580
sp|P24941|CDK2_HUMAN	sp|P24941|CDK2_HUMAN	P24941;Q00526	__Other	P24941	P24941	sp|P24941|CDK2_HUMAN Cyclin-dependent kinase 2 OS=Homo sapiens OX=9606 GN=CDK2 PE=1 SV=2;sp|Q00526|CDK3_HUMAN Cyclin-dependent kinase 3 OS=Homo sapiens OX=9606 GN=CDK3 PE=1 SV=1	1	112.646	1.11247e-26	230.24	99.582	+	1;2	_MENFQKVEKIGEGTYGVVYKARNKLTGEVV	X;X;X;X;X;X;X;X;X;X;X;X;X;X;Phospho (STY);Phospho (STY);X;X;X;X;X;X;X;X;X;X;X;X;X;X;X	XXXXXXXPPPPPPPPPPPPPPXXXXXXXXXX	IGEGT(1)Y(1)GVVYK	IGEGT(132.68)Y(112.65)GVVY(-112.65)K	6	3	0.35292	---	---	1485	381	15	15	3960	5695	20191107_Haura_KRAS-G12C_TMT-Batch1-H358-pY_run2	16327	3945	5597	20191112_Haura_KRAS-G12C_TMT-Batch2-Calu1-pY_run2	14415	3945	5597	20191112_Haura_KRAS-G12C_TMT-Batch2-Calu1-pY_run2	14415	Phosphorylation (STY)	2	IGEGpTpYGVVYK	5,6>>n	14,15>>n	1	1	IGEGTYGVVYK	IGEGpTpYGVVYK;P24941;Q00526;_MENFQKVEKIGEGTYGVVYKARNKLTGEVV;6;2;5,6>>n	ph_P24941:15
sp|P11413|G6PD_HUMAN	sp|P11413|G6PD_HUMAN	P11413	__Other	P11413	P11413	sp|P11413|G6PD_HUMAN Glucose-6-phosphate 1-dehydrogenase OS=Homo sapiens OX=9606 GN=G6PD PE=1 SV=4	0.988929	19.5097	0.00090949	123.79	95.618	+	1	KRNELVIRVQPNEAVYTKMMTKKPGMFFNPE	X;X;X;X;X;X;X;X;X;X;X;X;X;X;X;Phospho (STY);X;X;X;X;X;X;X;X;X;X;X;X;X;X;X	XXXXXXXXPPPPPPPPPPXXXXXXXXXXXXX	VQPNEAVY(0.989)T(0.011)K	VQPNEAVY(19.51)T(-19.51)K	8	3	0.77031	---	---	1378	308	401	401	9439	13405	20191113_Haura_KRAS-G12C_TMT-Batch3-H1792-pY_run2	11062	9435	13399	20191112_Haura_KRAS-G12C_TMT-Batch2-Calu1-pY_run2	11150	9437	13402	20191113_Haura_KRAS-G12C_TMT-Batch3-H1792-pY_run1	10995	Phosphorylation (STY)	1	VQPNEAVpYTK	8>>n	401>>n	0.989	0.989	VQPNEAVYTK	VQPNEAVpYTK;P11413;KRNELVIRVQPNEAVYTKMMTKKPGMFFNPE;8;1;8>>n	ph_P11413:401
sp|Q8N257|H2B3B_HUMAN;sp|Q99880|H2B1L_HUMAN	sp|Q99880|H2B1L_HUMAN;sp|Q8N257|H2B3B_HUMAN	O60814;P06899;P23527;P33778;P58876;P62807;Q16778;Q5QNW6;Q6DN03;Q6DRA6;Q8N257;Q93079;Q99877;Q99879;Q99880	__Other	Q8N257;Q99880	Q99880	sp|Q99880|H2B1L_HUMAN Histone H2B type 1-L OS=Homo sapiens OX=9606 GN=HIST1H2BL PE=1 SV=3;sp|Q99879|H2B1M_HUMAN Histone H2B type 1-M OS=Homo sapiens OX=9606 GN=HIST1H2BM PE=1 SV=3;sp|Q99877|H2B1N_HUMAN Histone H2B type 1-N OS=Homo sapiens OX=9606 GN=HIST1H	1	44.6108	0.00463656	72.234	44.709	+	1	DIFERIASEASRLAHYNKRSTITSREIQTAV;DIFERIASEASRLAHYNKRSTITSREVQTAV	X;X;X;X;X;X;X;X;X;X;X;X;X;X;X;Phospho (STY);X;X;X;X;X;X;X;X;X;X;X;X;X;X;X	XXXXXXXXXXXXPPPPPPPXXXXXXXXXXXX	LAHY(1)NKR	LAHY(44.61)NKR	4	3	1.979	---	---	1167	191;271	84;84	84	4782	6819	20191112_Haura_KRAS-G12C_TMT-Batch2-Calu1-pY_run2	6608	4779	6815	20191107_Haura_KRAS-G12C_TMT-Batch1-H358-pY_run1	6721	4779	6815	20191107_Haura_KRAS-G12C_TMT-Batch1-H358-pY_run1	6721	Phosphorylation (STY)	1	LAHpYNKR	4,x	84,x;84,x	1	1	LAHYNKR	LAHpYNKR;O60814;P06899;P23527;P33778;P58876;P62807;Q16778;Q5QNW6;Q6DN03;Q6DRA6;Q8N257;Q93079;Q99877;Q99879;Q99880;DIFERIASEASRLAHYNKRSTITSREIQTAV;DIFERIASEASRLAHYNKRSTITSREVQTAV;4;1;4,x	ph_Q8N257;Q99880:84;84
sp|Q9Y6M7|S4A7_HUMAN	sp|Q9Y6M7|S4A7_HUMAN	Q9Y6M7	__Other	Q9Y6M7	Q9Y6M7	sp|Q9Y6M7|S4A7_HUMAN Sodium bicarbonate cotransporter 3 OS=Homo sapiens OX=9606 GN=SLC4A7 PE=1 SV=2	0.968475	14.8554	0.00152614	60.464	53.012	---	2	RRRKDKESDKEDGRESPSYDTPSQRVQFILG	X;X;X;X;X;X;X;X;X;X;X;X;X;X;X;Phospho (STY);X;X;Phospho (STY);X;X;X;X;X;X;X;X;X;X;X;X	XXXXXXPPPPPPPPPPPPPPPPPPPXXXXXX	ES(0.004)DKEDGRES(0.968)PS(0.196)Y(0.821)DT(0.008)PS(0.002)QR	ES(-23.56)DKEDGRES(14.86)PS(-6.72)Y(6.72)DT(-20.6)PS(-26.63)QR	10	4	0.73316	---	---	601	1136	84	84	2155	2908	20191112_Haura_KRAS-G12C_TMT-Batch2-Calu1-pY_run2	7624	2155	2908	20191112_Haura_KRAS-G12C_TMT-Batch2-Calu1-pY_run2	7624	2155	2908	20191112_Haura_KRAS-G12C_TMT-Batch2-Calu1-pY_run2	7624	Phosphorylation (STY)	2	ESDKEDGREpSPSpYDTPSQR	10>13>>n	84>87>>n	0.968	0.795	ESDKEDGRESPSYDTPSQR	ESDKEDGREpSPSpYDTPSQR;Q9Y6M7;RRRKDKESDKEDGRESPSYDTPSQRVQFILG;10;2;10>13>>n	ph_Q9Y6M7:84
sp|Q9Y6M7|S4A7_HUMAN	sp|Q9Y6M7|S4A7_HUMAN	Q9Y6M7	__Other	Q9Y6M7	Q9Y6M7	sp|Q9Y6M7|S4A7_HUMAN Sodium bicarbonate cotransporter 3 OS=Homo sapiens OX=9606 GN=SLC4A7 PE=1 SV=2	0.820905	6.71635	0.00152614	60.464	53.012	---	2	KDKESDKEDGRESPSYDTPSQRVQFILGTED	X;X;X;X;X;X;X;X;X;X;X;X;Phospho (STY);X;X;Phospho (STY);X;X;X;X;X;X;X;X;X;X;X;X;X;X;X	XXXPPPPPPPPPPPPPPPPPPPXXXXXXXXX	ES(0.004)DKEDGRES(0.968)PS(0.196)Y(0.821)DT(0.008)PS(0.002)QR	ES(-23.56)DKEDGRES(14.86)PS(-6.72)Y(6.72)DT(-20.6)PS(-26.63)QR	13	4	0.73316	---	---	2762	1136	87	87	2155	2908	20191112_Haura_KRAS-G12C_TMT-Batch2-Calu1-pY_run2	7624	2155	2908	20191112_Haura_KRAS-G12C_TMT-Batch2-Calu1-pY_run2	7624	2155	2908	20191112_Haura_KRAS-G12C_TMT-Batch2-Calu1-pY_run2	7624	Phosphorylation (STY)	2	ESDKEDGREpSPSpYDTPSQR	10>13>>n	84>87>>n	0.821	0.795	ESDKEDGRESPSYDTPSQR	ESDKEDGREpSPSpYDTPSQR;Q9Y6M7;KDKESDKEDGRESPSYDTPSQRVQFILGTED;13;2;10>13>>n	ph_Q9Y6M7:87
sp|O60716|CTND1_HUMAN	sp|O60716|CTND1_HUMAN	O60716	__Other	O60716	O60716	sp|O60716|CTND1_HUMAN Catenin delta-1 OS=Homo sapiens OX=9606 GN=CTNND1 PE=1 SV=1	0.999971	45.2797	3.44765e-63	250.38	224.42	+	1;2	SDLKLNGPQDHSHLLYSTIPRMQEPGQIVET	X;X;X;X;X;X;X;X;X;X;X;X;X;X;X;Phospho (STY);Phospho (STY);Phospho (STY);X;X;X;X;X;X;X;X;X;X;X;X;X	XXXXPPPPPPPPPPPPPPPPPXXXXXXXXXX	LNGPQDHSHLLY(1)S(0.022)T(0.979)IPR	LNGPQDHS(-91.54)HLLY(45.28)S(-16.59)T(16.59)IPR	12	4	-1.6834	---	---	1153	189	96	96	5079	7344	20191112_Haura_KRAS-G12C_TMT-Batch2-Calu1-pY_run1	12831	5076	7339	20191113_Haura_KRAS-G12C_TMT-Batch3-H1792-pY_run2	12021	5076	7339	20191113_Haura_KRAS-G12C_TMT-Batch3-H1792-pY_run2	12021	Phosphorylation (STY)	2	LNGPQDHSHLLpYSpTIPR	12,14>>n	96,98>>n	1	0.979	LNGPQDHSHLLYSTIPR	LNGPQDHSHLLpYSpTIPR;O60716;SDLKLNGPQDHSHLLYSTIPRMQEPGQIVET;12;2;12,14>>n	ph_O60716:96
sp|Q99569|PKP4_HUMAN	sp|Q99569|PKP4_HUMAN	Q99569	__Other	Q99569	Q99569	sp|Q99569|PKP4_HUMAN Plakophilin-4 OS=Homo sapiens OX=9606 GN=PKP4 PE=1 SV=2	0.891238	9.76394	0.000756284	136.11	107.94	---	2	AVSPDLHITPIYEGRTYYSPVYRSPNHGTVE	X;X;X;X;X;X;X;X;X;X;X;X;X;X;X;Phospho (STY);X;Phospho (STY);Phospho (STY);X;X;X;X;X;X;X;X;X;X;X;X	XXXXXXXXXXXXXXXPPPPPPPPXXXXXXXX	T(0.891)Y(0.315)Y(0.754)S(0.039)PVYR	T(9.76)Y(-4.97)Y(4.97)S(-13.68)PVY(-67.56)R	1	2	1.0373	---	---	891	939	419	419	8885	12496	20191112_Haura_KRAS-G12C_TMT-Batch2-Calu1-pY_run2	11928	8884	12495	20191112_Haura_KRAS-G12C_TMT-Batch2-Calu1-pY_run1	11768	8885	12496	20191112_Haura_KRAS-G12C_TMT-Batch2-Calu1-pY_run2	11928	Phosphorylation (STY)	2	pTYpYSPVYR	1>3>>n	419>421>>n	0.891	0.672	TYYSPVYR	pTYpYSPVYR;Q99569;AVSPDLHITPIYEGRTYYSPVYRSPNHGTVE;1;2;1>3>>n	ph_Q99569:419
sp|Q04912|RON_HUMAN	sp|Q04912|RON_HUMAN	Q04912	__Other	Q04912	Q04912	sp|Q04912|RON_HUMAN Macrophage-stimulating protein receptor OS=Homo sapiens OX=9606 GN=MST1R PE=1 SV=3	0.810782	3.30913	0.000375279	127.76	94.553	---	2	ADFGLARDILDREYYSVQQHRHARLPVKWMA	X;X;X;X;X;X;X;X;X;X;X;X;X;Phospho (STY);X;Phospho (STY);X;X;X;X;X;X;X;X;X;X;X;X;X;X;X	XXXXXXXPPPPPPPPPPPPPPXXXXXXXXXX	DILDREY(0.595)Y(0.595)S(0.811)VQQHR	DILDREY(0)Y(0)S(3.31)VQQHR	9	3	-1.2549	---	---	244	566	1240	1240	1243	1677	20191107_Haura_KRAS-G12C_TMT-Batch1-H358-pY_run1	11546	1243	1677	20191107_Haura_KRAS-G12C_TMT-Batch1-H358-pY_run1	11546	1243	1677	20191107_Haura_KRAS-G12C_TMT-Batch1-H358-pY_run1	11546	Phosphorylation (STY)	2	DILDREpYYpSVQQHR	9>7,n	1240>1238,n	0.811	0.483	DILDREYYSVQQHR	DILDREpYYpSVQQHR;Q04912;ADFGLARDILDREYYSVQQHRHARLPVKWMA;9;2;9>7,n	ph_Q04912:1240
sp|P56945|BCAR1_HUMAN	sp|P56945|BCAR1_HUMAN	P56945	__Other	P56945	P56945	sp|P56945|BCAR1_HUMAN Breast cancer anti-estrogen resistance protein 1 OS=Homo sapiens OX=9606 GN=BCAR1 PE=1 SV=2	0.554652	0.953211	1.25561e-11	127.17	105.78	---	1	SVSKDVPDGPLLREETYDVPPAFAKAKPFDP	X;X;X;X;X;X;X;X;X;X;X;X;X;X;X;Phospho (STY);X;X;X;X;X;X;X;X;X;X;X;X;X;X;X	XXXXPPPPPPPPPPPPPPPPPPPPPXXXXXX	DVPDGPLLREET(0.555)Y(0.445)DVPPAFAK	DVPDGPLLREET(0.95)Y(-0.95)DVPPAFAK	12	3	0.28903	---	---	745	497	326	326	1629	2210	20191113_Haura_KRAS-G12C_TMT-Batch3-H1792-pY_run1	16715	1629	2210	20191113_Haura_KRAS-G12C_TMT-Batch3-H1792-pY_run1	16715	1629	2210	20191113_Haura_KRAS-G12C_TMT-Batch3-H1792-pY_run1	16715	Phosphorylation (STY)	1	DVPDGPLLREEpTYDVPPAFAK	12>n	326>n	0.555	0.555	DVPDGPLLREETYDVPPAFAK	DVPDGPLLREEpTYDVPPAFAK;P56945;SVSKDVPDGPLLREETYDVPPAFAKAKPFDP;12;1;12>n	ph_P56945:326
sp|Q96J84|KIRR1_HUMAN	sp|Q96J84|KIRR1_HUMAN	Q96J84	__Other	Q96J84	Q96J84	sp|Q96J84|KIRR1_HUMAN Kin of IRRE-like protein 1 OS=Homo sapiens OX=9606 GN=KIRREL1 PE=1 SV=2	1	93.9595	0.000302136	170.06	97.021	+	1;2	NVRAHEDRPSSRAVLYADYRAPGPARFDGRP	X;X;X;X;X;X;X;X;X;X;X;X;X;X;X;Phospho (STY);X;X;Phospho (STY);X;X;X;X;X;X;X;X;X;X;X;X	XXXXXXXXXXXXPPPPPPPPPPPPPPXXXXX	AVLY(1)ADY(1)RAPGPAR	AVLY(93.96)ADY(93.96)RAPGPAR	4	3	-0.41114	---	---	2355	911	622	622	890	1268	20191113_Haura_KRAS-G12C_TMT-Batch3-H1792-pY_run2	11921	873	1238	20191112_Haura_KRAS-G12C_TMT-Batch2-Calu1-pY_run1	12827	874	1241	20191112_Haura_KRAS-G12C_TMT-Batch2-Calu1-pY_run2	12884	Phosphorylation (STY)	2	AVLpYADpYRAPGPAR	4,7,x	622,625,x	1	1	AVLYADYRAPGPAR	AVLpYADpYRAPGPAR;Q96J84;NVRAHEDRPSSRAVLYADYRAPGPARFDGRP;4;2;4,7,x	ph_Q96J84:622
sp|P61604|CH10_HUMAN	sp|P61604|CH10_HUMAN	P61604	__Other	P61604	P61604	sp|P61604|CH10_HUMAN 10 kDa heat shock protein, mitochondrial OS=Homo sapiens OX=9606 GN=HSPE1 PE=1 SV=2	0.999989	49.6281	0.000885744	108.98	71.957	+	1	QPVSVKVGDKVLLPEYGGTKVVLDDKDYFLF	X;X;X;X;X;X;X;X;X;X;X;X;X;X;X;Phospho (STY);X;X;X;X;X;X;X;X;X;X;X;X;X;X;X	XXXXXXXXXXPPPPPPPPPPXXXXXXXXXXX	VLLPEY(1)GGTK	VLLPEY(49.63)GGT(-49.63)K	6	3	0.87111	---	---	1703	509	76	76	9327	13255	20191107_Haura_KRAS-G12C_TMT-Batch1-H358-pY_run2	14964	9330	13258	20191113_Haura_KRAS-G12C_TMT-Batch3-H1792-pY_run2	14898	9327	13255	20191107_Haura_KRAS-G12C_TMT-Batch1-H358-pY_run2	14964	Phosphorylation (STY)	1	VLLPEpYGGTK	6>>n	76>>n	1	1	VLLPEYGGTK	VLLPEpYGGTK;P61604;QPVSVKVGDKVLLPEYGGTKVVLDDKDYFLF;6;1;6>>n	ph_P61604:76
sp|P05556|ITB1_HUMAN	sp|P05556|ITB1_HUMAN	P05556	__Other	P05556	P05556	sp|P05556|ITB1_HUMAN Integrin beta-1 OS=Homo sapiens OX=9606 GN=ITGB1 PE=1 SV=2	1	123.509	9.40737e-69	251.69	229.82	---	1	KEKMNAKWDTGENPIYKSAVTTVVNPKYEGK	X;X;X;X;X;X;X;X;X;X;X;X;X;X;X;Phospho (STY);X;X;X;X;X;X;X;X;X;X;X;Phospho (STY);X;X;X	XXXXXXXPPPPPPPPPPPPPPPPPPPPXXXX	WDTGENPIY(1)K	WDT(-123.51)GENPIY(123.51)K	9	2	0.96591	---	---	1270	263	783	783	9688	13779	20191107_Haura_KRAS-G12C_TMT-Batch1-H358-pY_run1	15067	9701	13807	20191112_Haura_KRAS-G12C_TMT-Batch2-Calu1-pY_run1	15916	9701	13807	20191112_Haura_KRAS-G12C_TMT-Batch2-Calu1-pY_run1	15916	Phosphorylation (STY)	1	WDTGENPIpYK	9>>n	783>>n	1	1	WDTGENPIYK	WDTGENPIpYK;P05556;KEKMNAKWDTGENPIYKSAVTTVVNPKYEGK;9;1;9>>n	ph_P05556:783
sp|P27824|CALX_HUMAN	sp|P27824|CALX_HUMAN	P27824	__Other	P27824	P27824	sp|P27824|CALX_HUMAN Calnexin OS=Homo sapiens OX=9606 GN=CANX PE=1 SV=2	0.990072	19.988	0.00321993	64.297	45.986	+	1	KLHFIFRHKNPKTGIYEEKHAKRPDADLKTY	X;X;X;X;X;X;X;X;X;X;X;X;X;X;X;Phospho (STY);X;X;X;X;X;X;X;X;X;X;X;X;X;X;X	XXXXXXXXXXXXPPPPPPPPPPXXXXXXXXX	T(0.01)GIY(0.99)EEKHAK	T(-19.99)GIY(19.99)EEKHAK	4	4	2.5647	---	---	1499	392	214	214	8330	11749	20191113_Haura_KRAS-G12C_TMT-Batch3-H1792-pY_run1	8499	8330	11749	20191113_Haura_KRAS-G12C_TMT-Batch3-H1792-pY_run1	8499	8330	11749	20191113_Haura_KRAS-G12C_TMT-Batch3-H1792-pY_run1	8499	Phosphorylation (STY)	1	TGIpYEEKHAK	4>>n	214>>n	0.99	0.99	TGIYEEKHAK	TGIpYEEKHAK;P27824;KLHFIFRHKNPKTGIYEEKHAKRPDADLKTY;4;1;4>>n	ph_P27824:214
sp|Q99569|PKP4_HUMAN	sp|Q99569|PKP4_HUMAN	Q99569	__Other	Q99569	Q99569	sp|Q99569|PKP4_HUMAN Plakophilin-4 OS=Homo sapiens OX=9606 GN=PKP4 PE=1 SV=2	1	169.091	6.06693e-06	182.73	148.93	+	1	AEPYRPIQYRVQECNYNRLQHAVPADDGTTR	X;X;X;Phospho (STY);X;X;X;X;X;X;X;X;X;X;X;Phospho (STY);X;X;X;X;X;X;X;X;X;X;X;X;X;X;X	XXXXXXXXXXPPPPPPPPXXXXXXXXXXXXX	VQECNY(1)NR	VQECNY(169.09)NR	6	2	0.32479	---	---	2435	939	494	494	9418	13382	20191113_Haura_KRAS-G12C_TMT-Batch3-H1792-pY_run2	6849	9415	13375	20191112_Haura_KRAS-G12C_TMT-Batch2-Calu1-pY_run2	6834	9415	13375	20191112_Haura_KRAS-G12C_TMT-Batch2-Calu1-pY_run2	6834	Phosphorylation (STY)	1	VQECNpYNR	6,x	494,x	1	1	VQECNYNR	VQECNpYNR;Q99569;AEPYRPIQYRVQECNYNRLQHAVPADDGTTR;6;1;6,x	ph_Q99569:494
sp|Q9C0B5|ZDHC5_HUMAN	sp|Q9C0B5|ZDHC5_HUMAN	Q9C0B5	__Other	Q9C0B5	Q9C0B5	sp|Q9C0B5|ZDHC5_HUMAN Palmitoyltransferase ZDHHC5 OS=Homo sapiens OX=9606 GN=ZDHHC5 PE=1 SV=2	1	70.5087	6.45577e-36	212.97	182.75	---	1;2	LVPTGPTHREPSPVRYDNLSRHIVASLQERE	X;X;X;X;X;X;X;X;X;X;X;Phospho (STY);X;X;X;Phospho (STY);X;X;X;X;X;X;X;X;X;X;X;X;X;X;X	PPPPPPPPPPPPPPPPPPPPPXXXXXXXXXX	LVPTGPTHREPS(1)PVRY(1)DNLSR	LVPT(-64.85)GPT(-36.49)HREPS(36.49)PVRY(70.51)DNLS(-70.51)R	16	4	-1.3	---	---	2491	972	533	533	5353	7739	20191107_Haura_KRAS-G12C_TMT-Batch1-H358-pY_run1	10856	5360	7750	20191113_Haura_KRAS-G12C_TMT-Batch3-H1792-pY_run1	10610	5360	7750	20191113_Haura_KRAS-G12C_TMT-Batch3-H1792-pY_run1	10610	Phosphorylation (STY)	2	LVPTGPTHREPpSPVRpYDNLSR	16,12>>n	533,529>>n	1	1	LVPTGPTHREPSPVRYDNLSR	LVPTGPTHREPpSPVRpYDNLSR;Q9C0B5;LVPTGPTHREPSPVRYDNLSRHIVASLQERE;16;2;16,12>>n	ph_Q9C0B5:533
sp|O14832|PAHX_HUMAN	sp|O14832|PAHX_HUMAN	O14832	__Other	O14832	O14832	sp|O14832|PAHX_HUMAN Phytanoyl-CoA dioxygenase, peroxisomal OS=Homo sapiens OX=9606 GN=PHYH PE=1 SV=1	0.996073	24.3253	0.000212355	91.441	68.72	+	1	LGLTVMRDVTISKSEYAPSEKMITKVQDFQE	X;X;X;X;X;X;X;X;X;X;X;X;X;X;X;Phospho (STY);X;X;X;X;X;X;X;X;X;X;X;X;X;X;X	XXXXXXXPPPPPPPPPPPPPPXXXXXXXXXX	DVTISKS(0.004)EY(0.996)APSEK	DVT(-51.42)IS(-39.18)KS(-24.33)EY(24.33)APS(-39.18)EK	9	3	2.4161	---	---	1076	142	111	111	1646	2233	20191113_Haura_KRAS-G12C_TMT-Batch3-H1792-pY_run1	11417	1646	2233	20191113_Haura_KRAS-G12C_TMT-Batch3-H1792-pY_run1	11417	1646	2233	20191113_Haura_KRAS-G12C_TMT-Batch3-H1792-pY_run1	11417	Phosphorylation (STY)	1	DVTISKSEpYAPSEK	9>>n	111>>n	0.996	0.996	DVTISKSEYAPSEK	DVTISKSEpYAPSEK;O14832;LGLTVMRDVTISKSEYAPSEKMITKVQDFQE;9;1;9>>n	ph_O14832:111
REV__sp|Q8NEA4|FBX36_HUMAN	REV__sp|Q8NEA4|FBX36_HUMAN	---	__REV	REV__Q8NEA4	REV__Q8NEA4	---	0.510731	0	0.025081	74.162	32.879	---	2	---	X;X;X;X;X;X;X;X;X;X;X;X;X;X;X;Phospho (STY);Phospho (STY);X;X;X;X;X;X;X;X;X;X;X;X;X;X	XXXXXXXXXXXXXXXPPPPPPPPXXXXXXXX	S(0.511)Y(0.978)ERS(0.511)LSK	S(0)Y(13.56)ERS(0)LS(-37.92)K	1	3	-2.6492	+	---	34	77	142	142	8093	11437	20191107_Haura_KRAS-G12C_TMT-Batch1-H358-pY_run1	9747	8094	11438	20191112_Haura_KRAS-G12C_TMT-Batch2-Calu1-pY_run2	9656	8094	11438	20191112_Haura_KRAS-G12C_TMT-Batch2-Calu1-pY_run2	9656	Phosphorylation (STY)	2	pSpYERSLSK	2>>1,n	143>>142,n	0.511	0.5	SYERSLSK	pSpYERSLSK;---;---;1;2;2>>1,n	ph_REV__Q8NEA4:142
REV__sp|Q8NEA4|FBX36_HUMAN	REV__sp|Q8NEA4|FBX36_HUMAN	---	__REV	REV__Q8NEA4	REV__Q8NEA4	---	0.510733	0	0.025081	74.162	32.879	---	2	---	X;X;X;X;X;X;X;X;X;X;X;X;X;X;X;X;X;X;X;X;X;X;X;X;X;X;X;X;X;X;X	XXXXXXXXXXXXXXXXXXXXXXXXXXXXXXX	S(0.511)Y(0.978)ERS(0.511)LSK	S(0)Y(13.56)ERS(0)LS(-37.92)K	5	3	-2.6492	+	---	35	77	146	146	8093	11437	20191107_Haura_KRAS-G12C_TMT-Batch1-H358-pY_run1	9747	8094	11438	20191112_Haura_KRAS-G12C_TMT-Batch2-Calu1-pY_run2	9656	8094	11438	20191112_Haura_KRAS-G12C_TMT-Batch2-Calu1-pY_run2	9656	Phosphorylation (STY)	2	SpYERpSLSK	2>>5,n	143>>146,n	0.511	0.5	SYERSLSK	SpYERpSLSK;---;---;5;2;2>>5,n	ph_REV__Q8NEA4:146
sp|Q5R3F8|PPR29_HUMAN	sp|Q5R3F8|PPR29_HUMAN	Q5R3F8	__Other	Q5R3F8	Q5R3F8	sp|Q5R3F8|PPR29_HUMAN Protein phosphatase 1 regulatory subunit 29 OS=Homo sapiens OX=9606 GN=ELFN2 PE=1 SV=1	1	56.1218	0.000132008	104.75	54.707	+	1	LEAGLDTPKVATKGNYIEVRTGAGGDGLARP	X;X;X;X;X;X;X;X;X;X;X;X;X;X;X;Phospho (STY);X;X;X;X;X;X;X;X;X;X;X;X;X;X;X	XXXXXXXXXPPPPPPPPPPPXXXXXXXXXXX	GNY(1)IEVR	GNY(56.12)IEVR	3	2	0.16808	---	---	2033	697	502	502	3005	4153	20191112_Haura_KRAS-G12C_TMT-Batch2-Calu1-pY_run2	10347	3003	4151	20191107_Haura_KRAS-G12C_TMT-Batch1-H358-pY_run1	10375	3003	4151	20191107_Haura_KRAS-G12C_TMT-Batch1-H358-pY_run1	10375	Phosphorylation (STY)	1	GNpYIEVR	3,x	502,x	1	1	GNYIEVR	GNpYIEVR;Q5R3F8;LEAGLDTPKVATKGNYIEVRTGAGGDGLARP;3;1;3,x	ph_Q5R3F8:502
REV__sp|A0PJZ3|GXLT2_HUMAN	REV__sp|A0PJZ3|GXLT2_HUMAN	---	__REV	REV__A0PJZ3	REV__A0PJZ3	---	0.99778	26.5273	0.022937	44.543	18.419	+	1	---	X;X;X;X;X;X;X;X;X;X;X;X;X;X;X;Phospho (STY);X;X;X;X;X;X;X;X;X;X;X;X;X;X;X	XXXXXXPPPPPPPPPPPPXXXXXXXXXXXXX	AFT(0.002)PKQDDHY(0.998)VR	AFT(-26.53)PKQDDHY(26.53)VR	10	3	4.1738	+	---	979	12	78	78	217	313	20191112_Haura_KRAS-G12C_TMT-Batch2-Calu1-pY_run2	12063	217	313	20191112_Haura_KRAS-G12C_TMT-Batch2-Calu1-pY_run2	12063	217	313	20191112_Haura_KRAS-G12C_TMT-Batch2-Calu1-pY_run2	12063	Phosphorylation (STY)	1	AFTPKQDDHpYVR	10>>n	78>>n	0.998	0.998	AFTPKQDDHYVR	AFTPKQDDHpYVR;---;---;10;1;10>>n	ph_REV__A0PJZ3:78
sp|P07355|ANXA2_HUMAN	sp|P07355|ANXA2_HUMAN	A6NMY6;P07355	__Other	P07355	P07355	sp|P07355|ANXA2_HUMAN Annexin A2 OS=Homo sapiens OX=9606 GN=ANXA2 PE=1 SV=2;sp|A6NMY6|AXA2L_HUMAN Putative annexin A2-like protein OS=Homo sapiens OX=9606 GN=ANXA2P2 PE=5 SV=2	0.942665	12.4199	4.54814e-07	164.65	134.96	+	1	IRSEFKRKYGKSLYYYIQQDTKGDYQKALLY	X;X;X;X;X;X;X;X;X;X;X;X;X;X;X;Phospho (STY);X;X;X;X;X;X;X;X;X;X;X;X;X;X;Phospho (STY)	XXXXXXXXXXXPPPPPPPPPPPPPPPPXXXX	SLY(0.003)Y(0.054)Y(0.943)IQQDTKGDYQK	S(-47.67)LY(-24.53)Y(-12.42)Y(12.42)IQQDT(-77.54)KGDY(-76.82)QK	5	4	0.5157	---	---	1299	272	318	318	7487	10582	20191113_Haura_KRAS-G12C_TMT-Batch3-H1792-pY_run2	15708	7477	10572	20191112_Haura_KRAS-G12C_TMT-Batch2-Calu1-pY_run1	17428	7487	10582	20191113_Haura_KRAS-G12C_TMT-Batch3-H1792-pY_run2	15708	Phosphorylation (STY)	1	SLYYpYIQQDTKGDYQK	5>>n	318>>n	0.943	0.943	SLYYYIQQDTKGDYQK	SLYYpYIQQDTKGDYQK;A6NMY6;P07355;IRSEFKRKYGKSLYYYIQQDTKGDYQKALLY;5;1;5>>n	ph_P07355:318
sp|Q6ZS17|RIPR1_HUMAN	sp|Q6ZS17|RIPR1_HUMAN	Q6ZS17	__Other	Q6ZS17	Q6ZS17	sp|Q6ZS17|RIPR1_HUMAN Rho family-interacting cell polarization regulator 1 OS=Homo sapiens OX=9606 GN=RIPOR1 PE=1 SV=1	1	119.747	0.00042612	120.31	87.986	+	1	SQSPPDTPSLREQAFYNMLRRQEELENGTAW	Phospho (STY);X;X;X;X;X;X;X;X;X;X;X;X;X;X;Phospho (STY);X;X;X;X;X;X;X;X;X;X;X;X;X;X;X	XXXXXXXXXXXPPPPPPPPPXXXXXXXXXXX	EQAFY(1)NMLR	EQAFY(119.75)NMLR	5	2	0.57065	---	---	2100	741	364	364	2077	2795	20191112_Haura_KRAS-G12C_TMT-Batch2-Calu1-pY_run2	16037	2076	2794	20191112_Haura_KRAS-G12C_TMT-Batch2-Calu1-pY_run1	15938	2077	2795	20191112_Haura_KRAS-G12C_TMT-Batch2-Calu1-pY_run2	16037	Phosphorylation (STY)	1	EQAFpYNMLR	5,x	364,x	1	1	EQAFYNMLR	EQAFpYNMLR;Q6ZS17;SQSPPDTPSLREQAFYNMLRRQEELENGTAW;5;1;5,x	ph_Q6ZS17:364
sp|P05023|AT1A1_HUMAN	sp|P05023|AT1A1_HUMAN	P05023	__Other	P05023	P05023	sp|P05023|AT1A1_HUMAN Sodium/potassium-transporting ATPase subunit alpha-1 OS=Homo sapiens OX=9606 GN=ATP1A1 PE=1 SV=1	0.999986	48.4557	7.7088e-16	218.06	170.99	+	1	FSTNCVEGTARGIVVYTGDRTVMGRIATLAS	X;X;X;X;X;X;X;X;X;X;X;X;X;X;X;Phospho (STY);X;X;X;X;X;X;X;X;X;X;X;X;X;X;X	XXXXXXXXXXXPPPPPPPPPPPPPPXXXXXX	GIVVY(1)TGDR	GIVVY(48.46)T(-48.46)GDR	5	2	2.1864	---	---	1261	258	260	260	2918	4041	20191113_Haura_KRAS-G12C_TMT-Batch3-H1792-pY_run2	11754	2915	4035	20191112_Haura_KRAS-G12C_TMT-Batch2-Calu1-pY_run1	11633	2915	4035	20191112_Haura_KRAS-G12C_TMT-Batch2-Calu1-pY_run1	11633	Phosphorylation (STY)	1	GIVVpYTGDR	5>>n	260>>n	1	1	GIVVYTGDR	GIVVpYTGDR;P05023;FSTNCVEGTARGIVVYTGDRTVMGRIATLAS;5;1;5>>n	ph_P05023:260
sp|Q14247|SRC8_HUMAN	sp|Q14247|SRC8_HUMAN	Q14247	__Other	Q14247	Q14247	sp|Q14247|SRC8_HUMAN Src substrate cortactin OS=Homo sapiens OX=9606 GN=CTTN PE=1 SV=2	0.963591	17.27	0.000122623	102.73	69.042	+	1	FEYQGKTEKHASQKDYSSGFGGKYGVQADRV	X;X;X;X;X;X;X;X;X;X;X;X;X;X;X;Phospho (STY);X;X;X;X;X;X;X;Phospho (STY);X;X;X;X;X;X;X	XXXXXXXXXPPPPPPPPPPPPPPXXXXXXXX	HAS(0.018)QKDY(0.964)S(0.018)SGFGGK	HAS(-17.27)QKDY(17.27)S(-17.27)S(-35.45)GFGGK	7	4	2.052	---	---	1940	640	154	154	3426	4692	20191112_Haura_KRAS-G12C_TMT-Batch2-Calu1-pY_run2	6939	3426	4692	20191112_Haura_KRAS-G12C_TMT-Batch2-Calu1-pY_run2	6939	3426	4692	20191112_Haura_KRAS-G12C_TMT-Batch2-Calu1-pY_run2	6939	Phosphorylation (STY)	1	HASQKDpYSSGFGGK	7>>n	154>>n	0.964	0.964	HASQKDYSSGFGGK	HASQKDpYSSGFGGK;Q14247;FEYQGKTEKHASQKDYSSGFGGKYGVQADRV;7;1;7>>n	ph_Q14247:154
sp|Q14439|GP176_HUMAN	sp|Q14439|GP176_HUMAN	Q14439	__Other	Q14439	Q14439	sp|Q14439|GP176_HUMAN G-protein coupled receptor 176 OS=Homo sapiens OX=9606 GN=GPR176 PE=2 SV=1	1	64.4347	4.294e-05	159.79	116.55	+	1	QIFKPTEDEEESEAKYIGSADFQAKEIFSTC	X;X;X;X;X;X;X;X;X;X;X;X;X;X;X;Phospho (STY);X;X;X;X;X;X;X;X;X;X;X;X;X;X;X	XXXXXXXXXXXXXXXPPPPPPPPPPXXXXXX	Y(1)IGSADFQAK	Y(64.43)IGS(-64.43)ADFQAK	1	2	1.2262	---	---	1952	643	394	394	10059	14227	20191112_Haura_KRAS-G12C_TMT-Batch2-Calu1-pY_run1	13800	10059	14227	20191112_Haura_KRAS-G12C_TMT-Batch2-Calu1-pY_run1	13800	10059	14227	20191112_Haura_KRAS-G12C_TMT-Batch2-Calu1-pY_run1	13800	Phosphorylation (STY)	1	pYIGSADFQAK	1>>n	394>>n	1	1	YIGSADFQAK	pYIGSADFQAK;Q14439;QIFKPTEDEEESEAKYIGSADFQAKEIFSTC;1;1;1>>n	ph_Q14439:394
sp|Q99569|PKP4_HUMAN	sp|Q99569|PKP4_HUMAN	Q99569	__Other	Q99569	Q99569	sp|Q99569|PKP4_HUMAN Plakophilin-4 OS=Homo sapiens OX=9606 GN=PKP4 PE=1 SV=2	0.999473	32.8459	6.10356e-10	203.57	158.88	+	1;2	SPDLHITPIYEGRTYYSPVYRSPNHGTVELQ	X;X;X;X;X;X;X;X;X;X;X;X;X;Phospho (STY);X;Phospho (STY);X;X;X;X;X;X;X;X;X;X;X;X;X;X;X	XXXXXXXXXXXXXPPPPPPPPXXXXXXXXXX	TYY(0.999)S(0.001)PVYR	T(-53.41)Y(-54.17)Y(32.85)S(-32.85)PVY(-108.91)R	3	2	0.31097	---	---	2432	939	421	421	8872	12480	20191107_Haura_KRAS-G12C_TMT-Batch1-H358-pY_run2	11477	8872	12480	20191107_Haura_KRAS-G12C_TMT-Batch1-H358-pY_run2	11477	8872	12480	20191107_Haura_KRAS-G12C_TMT-Batch1-H358-pY_run2	11477	Phosphorylation (STY)	1	TYpYSPVYR	3>>n	421>>n	0.999	0.999	TYYSPVYR	TYpYSPVYR;Q99569;SPDLHITPIYEGRTYYSPVYRSPNHGTVELQ;3;1;3>>n	ph_Q99569:421
sp|Q70EL4|UBP43_HUMAN	sp|Q70EL4|UBP43_HUMAN	Q70EL4	__Other	Q70EL4	Q70EL4	sp|Q70EL4|UBP43_HUMAN Ubiquitin carboxyl-terminal hydrolase 43 OS=Homo sapiens OX=9606 GN=USP43 PE=1 SV=2	0.993004	23.499	0.000119774	115.12	97.752	+	1	ALGMSQRTVPGEQASYGTFQRVKYHTLSLGR	X;X;X;X;X;X;X;X;X;X;X;X;X;X;X;Phospho (STY);X;X;X;X;X;X;X;X;X;X;X;X;X;X;X	XXXXXXXPPPPPPPPPPPPPPXXXXXXXXXX	TVPGEQAS(0.003)Y(0.993)GT(0.004)FQR	T(-100.52)VPGEQAS(-25.89)Y(23.5)GT(-23.5)FQR	9	3	-1.1171	---	---	2109	747	1099	1099	8751	12294	20191107_Haura_KRAS-G12C_TMT-Batch1-H358-pY_run1	11532	8751	12294	20191107_Haura_KRAS-G12C_TMT-Batch1-H358-pY_run1	11532	8751	12294	20191107_Haura_KRAS-G12C_TMT-Batch1-H358-pY_run1	11532	Phosphorylation (STY)	1	TVPGEQASpYGTFQR	9>>n	1099>>n	0.993	0.993	TVPGEQASYGTFQR	TVPGEQASpYGTFQR;Q70EL4;ALGMSQRTVPGEQASYGTFQRVKYHTLSLGR;9;1;9>>n	ph_Q70EL4:1099
sp|Q96J84|KIRR1_HUMAN	sp|Q96J84|KIRR1_HUMAN	Q96J84	__Other	Q96J84	Q96J84	sp|Q96J84|KIRR1_HUMAN Kin of IRRE-like protein 1 OS=Homo sapiens OX=9606 GN=KIRREL1 PE=1 SV=2	0.999984	48.2842	1.25119e-05	131.28	95.87	+	1;2	PQAPPSGLERTPYEAYDPIGKYATATRFSYT	X;X;X;X;X;X;X;X;X;X;X;X;X;X;X;Phospho (STY);X;X;X;X;X;Phospho (STY);X;X;X;X;X;X;X;X;X	XXXXXXXXXXPPPPPPPPPPPPPPPPPXXXX	TPYEAY(1)DPIGK	T(-59.19)PY(-48.28)EAY(48.28)DPIGK	6	3	0.65913	---	---	2365	911	724	724	8571	12060	20191112_Haura_KRAS-G12C_TMT-Batch2-Calu1-pY_run2	13955	8571	12060	20191112_Haura_KRAS-G12C_TMT-Batch2-Calu1-pY_run2	13955	8584	12080	20191112_Haura_KRAS-G12C_TMT-Batch2-Calu1-pY_run2	13977	Phosphorylation (STY)	1	TPYEApYDPIGK	6>>n	724>>n	1	1	TPYEAYDPIGK	TPYEApYDPIGK;Q96J84;PQAPPSGLERTPYEAYDPIGKYATATRFSYT;6;1;6>>n	ph_Q96J84:724
sp|Q7L576|CYFP1_HUMAN	sp|Q7L576|CYFP1_HUMAN	Q7L576;Q96F07	__Other	Q7L576	Q7L576	sp|Q7L576|CYFP1_HUMAN Cytoplasmic FMR1-interacting protein 1 OS=Homo sapiens OX=9606 GN=CYFIP1 PE=1 SV=1;sp|Q96F07|CYFP2_HUMAN Cytoplasmic FMR1-interacting protein 2 OS=Homo sapiens OX=9606 GN=CYFIP2 PE=1 SV=2	1	48.6251	0.0149983	48.625	26.092	---	1	IPQVKCNEQPNRVEIYEKTVEVLEPEVTKLM	X;X;X;X;X;X;X;X;X;X;X;X;X;X;X;Phospho (STY);X;X;X;X;X;X;X;X;X;X;X;X;X;X;X	XXXXXPPPPPPPPPPPPPXXXXXXXXXXXXX	CNEQPNRVEIY(1)EK	CNEQPNRVEIY(48.63)EK	11	3	2.3224	---	---	2113	752	108	108	1061	1476	20191113_Haura_KRAS-G12C_TMT-Batch3-H1792-pY_run2	10000	1061	1476	20191113_Haura_KRAS-G12C_TMT-Batch3-H1792-pY_run2	10000	1061	1476	20191113_Haura_KRAS-G12C_TMT-Batch3-H1792-pY_run2	10000	Phosphorylation (STY)	1	CNEQPNRVEIpYEK	11,x	108,x	1	1	CNEQPNRVEIYEK	CNEQPNRVEIpYEK;Q7L576;Q96F07;IPQVKCNEQPNRVEIYEKTVEVLEPEVTKLM;11;1;11,x	ph_Q7L576:108
sp|Q14247|SRC8_HUMAN	sp|Q14247|SRC8_HUMAN	Q14247	__Other	Q14247	Q14247	sp|Q14247|SRC8_HUMAN Src substrate cortactin OS=Homo sapiens OX=9606 GN=CTTN PE=1 SV=2	0.999972	45.5928	0.000796731	76.465	43.24	+	1	FEYQGKTEKHESQKDYVKGFGGKFGVQTDRQ	X;X;X;X;X;X;X;X;X;X;X;X;X;X;X;Phospho (STY);X;X;X;X;X;X;X;X;X;X;X;X;X;X;X	XXXXXXPPPPPPPPPPPPXXXXXXXXXXXXX	HESQKDY(1)VK	HES(-45.59)QKDY(45.59)VK	7	4	4.1909	---	---	1941	640	228	228	3440	4708	20191113_Haura_KRAS-G12C_TMT-Batch3-H1792-pY_run1	5723	3440	4708	20191113_Haura_KRAS-G12C_TMT-Batch3-H1792-pY_run1	5723	8300	11716	20191112_Haura_KRAS-G12C_TMT-Batch2-Calu1-pY_run1	6196	Phosphorylation (STY)	1	HESQKDpYVK	7>>n	228>>n	1	1	HESQKDYVK	HESQKDpYVK;Q14247;FEYQGKTEKHESQKDYVKGFGGKFGVQTDRQ;7;1;7>>n	ph_Q14247:228
sp|Q8IWW6|RHG12_HUMAN	sp|Q8IWW6|RHG12_HUMAN	Q8IWW6	__Other	Q8IWW6	Q8IWW6	sp|Q8IWW6|RHG12_HUMAN Rho GTPase-activating protein 12 OS=Homo sapiens OX=9606 GN=ARHGAP12 PE=1 SV=1	0.855107	8.1185	0.00114099	129.85	92.293	+	1	NEKWLKHVDDQGRQYYYSADGSRSEWELPKY	X;X;X;X;X;X;X;X;X;X;X;X;X;X;X;Phospho (STY);X;X;X;X;X;X;X;X;X;X;X;X;X;X;X	XXXXXXXXXXXXXPPPPPPPPPPXXXXXXXX	QY(0.013)Y(0.855)Y(0.132)SADGSR	QY(-18.24)Y(8.12)Y(-8.12)S(-36.2)ADGS(-88.4)R	3	2	-0.18839	---	---	2180	794	376	376	6667	9420	20191112_Haura_KRAS-G12C_TMT-Batch2-Calu1-pY_run1	9713	6667	9420	20191112_Haura_KRAS-G12C_TMT-Batch2-Calu1-pY_run1	9713	6667	9420	20191112_Haura_KRAS-G12C_TMT-Batch2-Calu1-pY_run1	9713	Phosphorylation (STY)	1	QYpYYSADGSR	3>>n	376>>n	0.855	0.855	QYYYSADGSR	QYpYYSADGSR;Q8IWW6;NEKWLKHVDDQGRQYYYSADGSRSEWELPKY;3;1;3>>n	ph_Q8IWW6:376
sp|Q9UN70|PCDGK_HUMAN	sp|Q9UN70|PCDGK_HUMAN	Q9UN70	__Other	Q9UN70	Q9UN70	sp|Q9UN70|PCDGK_HUMAN Protocadherin gamma-C3 OS=Homo sapiens OX=9606 GN=PCDHGC3 PE=1 SV=1	1	116.655	0.000174376	132.09	77.937	+	1	LASRQNTLRSCDPVFYRQVLGAESAPPGQQA	X;X;X;X;X;X;X;X;X;X;X;X;X;X;X;Phospho (STY);X;X;X;X;X;X;X;X;X;X;X;X;X;X;X	XXXXXXXXXPPPPPPPPXXXXXXXXXXXXXX	SCDPVFY(1)R	S(-116.65)CDPVFY(116.65)R	7	2	-0.012789	---	---	2684	1092	797	797	6920	9744	20191112_Haura_KRAS-G12C_TMT-Batch2-Calu1-pY_run2	12009	6920	9744	20191112_Haura_KRAS-G12C_TMT-Batch2-Calu1-pY_run2	12009	6918	9742	20191107_Haura_KRAS-G12C_TMT-Batch1-H358-pY_run2	11987	Phosphorylation (STY)	1	SCDPVFpYR	7>>n	797>>n	1	1	SCDPVFYR	SCDPVFpYR;Q9UN70;LASRQNTLRSCDPVFYRQVLGAESAPPGQQA;7;1;7>>n	ph_Q9UN70:797
sp|Q7Z6J2|GRASP_HUMAN	sp|Q7Z6J2|GRASP_HUMAN	Q7Z6J2	__Other	Q7Z6J2	Q7Z6J2	sp|Q7Z6J2|GRASP_HUMAN General receptor for phosphoinositides 1-associated scaffold protein OS=Homo sapiens OX=9606 GN=GRASP PE=1 SV=1	1	57.3483	0.00906686	57.348	30.013	+	1	YGTSIRKAELEARLQYLKQTLYEKWGEYRSL	X;X;X;X;X;X;X;X;X;X;X;X;X;X;X;Phospho (STY);X;X;X;X;X;X;X;X;X;X;X;X;X;X;X	XXXXXXXPPPPPPPPPPPXXXXXXXXXXXXX	AELEARLQY(1)LK	AELEARLQY(57.35)LK	9	3	1.9003	---	---	2127	764	203	203	167	211	20191113_Haura_KRAS-G12C_TMT-Batch3-H1792-pY_run2	12109	167	211	20191113_Haura_KRAS-G12C_TMT-Batch3-H1792-pY_run2	12109	167	211	20191113_Haura_KRAS-G12C_TMT-Batch3-H1792-pY_run2	12109	Phosphorylation (STY)	1	AELEARLQpYLK	9,x	203,x	1	1	AELEARLQYLK	AELEARLQpYLK;Q7Z6J2;YGTSIRKAELEARLQYLKQTLYEKWGEYRSL;9;1;9,x	ph_Q7Z6J2:203
sp|Q9UKY7|CDV3_HUMAN	sp|Q9UKY7|CDV3_HUMAN	Q9UKY7	__Other	Q9UKY7	Q9UKY7	sp|Q9UKY7|CDV3_HUMAN Protein CDV3 homolog OS=Homo sapiens OX=9606 GN=CDV3 PE=1 SV=1	0.999956	43.5966	2.2189e-21	225.08	158.05	+	1	KDEDEWKELEQKEVDYSGLRVQAMQISSEKE	X;X;X;X;X;X;X;X;X;X;X;X;X;X;X;Phospho (STY);X;X;X;X;X;X;X;X;X;X;X;X;X;X;X	XXXXXXXXXXXXPPPPPPPPXXXXXXXXXXX	EVDY(1)SGLR	EVDY(43.6)S(-43.6)GLR	4	2	0.47202	---	---	2668	1084	95	95	2244	3012	20191112_Haura_KRAS-G12C_TMT-Batch2-Calu1-pY_run1	10318	2244	3012	20191112_Haura_KRAS-G12C_TMT-Batch2-Calu1-pY_run1	10318	2244	3012	20191112_Haura_KRAS-G12C_TMT-Batch2-Calu1-pY_run1	10318	Phosphorylation (STY)	1	EVDpYSGLR	4>>n	95>>n	1	1	EVDYSGLR	EVDpYSGLR;Q9UKY7;KDEDEWKELEQKEVDYSGLRVQAMQISSEKE;4;1;4>>n	ph_Q9UKY7:95
sp|P46976|GLYG_HUMAN	sp|P46976|GLYG_HUMAN	P46976	__Other	P46976	P46976	sp|P46976|GLYG_HUMAN Glycogenin-1 OS=Homo sapiens OX=9606 GN=GYG1 PE=1 SV=4	0.999982	47.4161	4.58347e-11	112.44	96.496	+	1	SSEERKERWEQGQADYMGADSFDNIKRKLDT	X;X;X;X;X;X;X;X;X;X;X;X;X;X;X;Phospho (STY);X;X;X;X;X;X;X;X;X;X;X;X;X;X;X	XXXXXXPPPPPPPPPPPPPPPPPPPPPXXXX	WEQGQADY(1)MGADSFDNIKR	WEQGQADY(47.42)MGADS(-47.42)FDNIKR	8	3	1.3496	---	---	1617	452	332	332	9709	13820	20191112_Haura_KRAS-G12C_TMT-Batch2-Calu1-pY_run1	14875	9709	13820	20191112_Haura_KRAS-G12C_TMT-Batch2-Calu1-pY_run1	14875	9709	13820	20191112_Haura_KRAS-G12C_TMT-Batch2-Calu1-pY_run1	14875	Phosphorylation (STY)	1	WEQGQADpYMGADSFDNIKR	8>>n	332>>n	1	1	WEQGQADYMGADSFDNIKR	WEQGQADpYMGADSFDNIKR;P46976;SSEERKERWEQGQADYMGADSFDNIKRKLDT;8;1;8>>n	ph_P46976:332
sp|O95817|BAG3_HUMAN	sp|O95817|BAG3_HUMAN	O95817	__Other	O95817	O95817	sp|O95817|BAG3_HUMAN BAG family molecular chaperone regulator 3 OS=Homo sapiens OX=9606 GN=BAG3 PE=1 SV=3	0.999999	61.0674	1.72754e-27	204.78	180.74	+	1;2	HYPAQQGEYQTHQPVYHKIQGDDWEPRPLRA	X;X;X;X;X;X;X;X;X;X;Phospho (STY);X;X;X;X;Phospho (STY);X;X;X;X;X;X;X;X;X;X;X;X;X;X;X	PPPPPPPPPPPPPPPPPPPPPPPPPPPPPPX	THYPAQQGEYQTHQPVY(1)HK	T(-200.51)HY(-189.85)PAQQGEY(-89.63)QT(-61.07)HQPVY(61.07)HK	17	4	0.71235	---	---	1229	235	247	247	8404	11841	20191112_Haura_KRAS-G12C_TMT-Batch2-Calu1-pY_run1	7747	8404	11841	20191112_Haura_KRAS-G12C_TMT-Batch2-Calu1-pY_run1	7747	8404	11841	20191112_Haura_KRAS-G12C_TMT-Batch2-Calu1-pY_run1	7747	Phosphorylation (STY)	1	THYPAQQGEYQTHQPVpYHK	17>>n	247>>n	1	1	THYPAQQGEYQTHQPVYHK	THYPAQQGEYQTHQPVpYHK;O95817;HYPAQQGEYQTHQPVYHKIQGDDWEPRPLRA;17;1;17>>n	ph_O95817:247
sp|Q9HC36|MRM3_HUMAN	sp|Q9HC36|MRM3_HUMAN	Q9HC36	__Other	Q9HC36	Q9HC36	sp|Q9HC36|MRM3_HUMAN rRNA methyltransferase 3, mitochondrial OS=Homo sapiens OX=9606 GN=MRM3 PE=1 SV=2	0.983528	17.7603	0.012516	50.284	20.477	---	1	SASRAPSTWEESGLRYDKAYPGDRRLSSVMT	X;X;X;X;X;X;X;X;X;X;X;X;X;X;X;Phospho (STY);X;X;X;X;X;X;X;X;X;X;X;X;X;X;X	XXXXXXXXXXXXXXXPPPPPPPPPPXXXXXX	Y(0.984)DKAY(0.016)PGDRR	Y(17.76)DKAY(-17.76)PGDRR	1	3	2.467	---	---	2562	1008	94	94	9857	13995	20191112_Haura_KRAS-G12C_TMT-Batch2-Calu1-pY_run2	7330	9857	13995	20191112_Haura_KRAS-G12C_TMT-Batch2-Calu1-pY_run2	7330	9857	13995	20191112_Haura_KRAS-G12C_TMT-Batch2-Calu1-pY_run2	7330	Phosphorylation (STY)	1	pYDKAYPGDRR	1>>n	94>>n	0.984	0.984	YDKAYPGDRR	pYDKAYPGDRR;Q9HC36;SASRAPSTWEESGLRYDKAYPGDRRLSSVMT;1;1;1>>n	ph_Q9HC36:94
sp|Q04912|RON_HUMAN	sp|Q04912|RON_HUMAN	Q04912	__Other	Q04912	Q04912	sp|Q04912|RON_HUMAN Macrophage-stimulating protein receptor OS=Homo sapiens OX=9606 GN=MST1R PE=1 SV=3	0.926758	10.9855	7.56753e-05	128.9	101.25	+	1;2	VADFGLARDILDREYYSVQQHRHARLPVKWM	X;X;X;X;X;X;X;X;X;X;X;X;X;X;Phospho (STY);Phospho (STY);X;X;X;X;X;X;X;X;X;X;X;X;X;X;X	XXXXXXXXPPPPPPPPPPPPPPXXXXXXXXX	DILDREY(0.992)Y(0.927)S(0.081)VQQHR	DILDREY(20.73)Y(10.99)S(-10.99)VQQHR	8	4	-1.0701	---	---	1797	566	1239	1239	1246	1680	20191107_Haura_KRAS-G12C_TMT-Batch1-H358-pY_run2	11527	1246	1680	20191107_Haura_KRAS-G12C_TMT-Batch1-H358-pY_run2	11527	1246	1680	20191107_Haura_KRAS-G12C_TMT-Batch1-H358-pY_run2	11527	Phosphorylation (STY)	2	DILDREpYpYSVQQHR	7>8>>n	1238>1239>>n	0.927	0.92	DILDREYYSVQQHR	DILDREpYpYSVQQHR;Q04912;VADFGLARDILDREYYSVQQHRHARLPVKWM;8;2;7>8>>n	ph_Q04912:1239
sp|Q8N4C8|MINK1_HUMAN	sp|Q8N4C8|MINK1_HUMAN	Q8N4C8	__Other	Q8N4C8	Q8N4C8	sp|Q8N4C8|MINK1_HUMAN Misshapen-like kinase 1 OS=Homo sapiens OX=9606 GN=MINK1 PE=1 SV=2	0.566134	1.21537	0.000387387	79.771	66.634	---	1	KGQSPPSKDGSGDYQSRGLVKAPGKSSFTMF	X;X;X;X;X;X;X;X;X;X;X;X;X;X;X;Phospho (STY);X;X;X;X;X;X;X;X;X;X;X;X;X;X;X	XPPPPPPPPPPPPPPPPXXXXXXXXXXXXXX	GQSPPSKDGS(0.006)GDY(0.428)QS(0.566)R	GQS(-40.66)PPS(-35.36)KDGS(-19.96)GDY(-1.22)QS(1.22)R	15	3	0.87354	---	---	392	814	939	939	3102	4287	20191107_Haura_KRAS-G12C_TMT-Batch1-H358-pY_run2	7212	3103	4288	20191112_Haura_KRAS-G12C_TMT-Batch2-Calu1-pY_run1	6928	3103	4288	20191112_Haura_KRAS-G12C_TMT-Batch2-Calu1-pY_run1	6928	Phosphorylation (STY)	1	GQSPPSKDGSGDYQpSR	15>n	939>n	0.566	0.566	GQSPPSKDGSGDYQSR	GQSPPSKDGSGDYQpSR;Q8N4C8;KGQSPPSKDGSGDYQSRGLVKAPGKSSFTMF;15;1;15>n	ph_Q8N4C8:939
sp|Q9NXB0|MKS1_HUMAN	sp|Q9NXB0|MKS1_HUMAN	Q9NXB0	__Other	Q9NXB0	Q9NXB0	sp|Q9NXB0|MKS1_HUMAN Meckel syndrome type 1 protein OS=Homo sapiens OX=9606 GN=MKS1 PE=1 SV=2	1	47.8486	0.0296808	47.849	8.6302	---	1	YQPAAELGKDLIDLATFRPQPTASGHRPEED	X;X;X;X;X;X;X;X;X;X;X;X;X;X;X;Phospho (STY);X;X;X;X;X;X;X;X;X;X;X;X;X;X;X	XXXXXXXXXPPPPPPPPPXXXXXXXXXXXXX	DLIDLAT(1)FR	DLIDLAT(47.85)FR	7	2	-0.1491	---	---	931	1044	56	56	1333	1785	20191113_Haura_KRAS-G12C_TMT-Batch3-H1792-pY_run2	14397	1333	1785	20191113_Haura_KRAS-G12C_TMT-Batch3-H1792-pY_run2	14397	1333	1785	20191113_Haura_KRAS-G12C_TMT-Batch3-H1792-pY_run2	14397	Phosphorylation (STY)	1	DLIDLApTFR	7,x	56,x	1	1	DLIDLATFR	DLIDLApTFR;Q9NXB0;YQPAAELGKDLIDLATFRPQPTASGHRPEED;7;1;7,x	ph_Q9NXB0:56
sp|P08670|VIME_HUMAN	sp|P08670|VIME_HUMAN	P08670	__Other	P08670	P08670	sp|P08670|VIME_HUMAN Vimentin OS=Homo sapiens OX=9606 GN=VIM PE=1 SV=4	0.999999	61.1714	0.00011237	105.52	87.535	+	1	RNNDALRQAKQESTEYRRQVQSLTCEVDALK	X;X;X;X;X;X;X;X;X;X;X;X;X;X;X;Phospho (STY);X;X;X;X;X;X;X;X;X;X;X;X;X;X;X	XXXXXXXXXXPPPPPPPPXXXXXXXXXXXXX	QESTEY(1)RR	QES(-76.56)T(-61.17)EY(61.17)RR	6	3	-0.43544	---	---	1340	285	319	319	6313	8986	20191113_Haura_KRAS-G12C_TMT-Batch3-H1792-pY_run2	4615	6313	8986	20191113_Haura_KRAS-G12C_TMT-Batch3-H1792-pY_run2	4615	6313	8986	20191113_Haura_KRAS-G12C_TMT-Batch3-H1792-pY_run2	4615	Phosphorylation (STY)	1	QESTEpYRR	6>>n	319>>n	1	1	QESTEYRR	QESTEpYRR;P08670;RNNDALRQAKQESTEYRRQVQSLTCEVDALK;6;1;6>>n	ph_P08670:319
sp|Q13443|ADAM9_HUMAN	sp|Q13443|ADAM9_HUMAN	Q13443	__Other	Q13443	Q13443	sp|Q13443|ADAM9_HUMAN Disintegrin and metalloproteinase domain-containing protein 9 OS=Homo sapiens OX=9606 GN=ADAM9 PE=1 SV=1	1	46.4151	9.67875e-13	191.44	115.41	+	1;2;3	PRHVSPVTPPREVPIYANRFAVPTYAAKQPQ	X;X;X;X;Phospho (STY);X;X;Phospho (STY);X;X;X;X;X;X;X;Phospho (STY);X;X;X;X;X;X;X;X;Phospho (STY);X;X;X;X;X;X	XXPPPPPPPPPPPPPPPPPXXXXXXXXXXXX	HVS(1)PVT(1)PPREVPIY(1)ANR	HVS(46.42)PVT(46.42)PPREVPIY(46.42)ANR	14	3	-1.1161	---	---	1888	613	769	769	3740	5207	20191113_Haura_KRAS-G12C_TMT-Batch3-H1792-pY_run2	12880	2264	3063	20191112_Haura_KRAS-G12C_TMT-Batch2-Calu1-pY_run1	10928	3707	5156	20191112_Haura_KRAS-G12C_TMT-Batch2-Calu1-pY_run2	10659	Phosphorylation (STY)	3	HVpSPVpTPPREVPIpYANR	3,6,14,x	758,761,769,x	1	1	HVSPVTPPREVPIYANR	HVpSPVpTPPREVPIpYANR;Q13443;PRHVSPVTPPREVPIYANRFAVPTYAAKQPQ;14;3;3,6,14,x	ph_Q13443:769
sp|Q9NZM3|ITSN2_HUMAN	sp|Q9NZM3|ITSN2_HUMAN	Q9NZM3	__Other	Q9NZM3	Q9NZM3	sp|Q9NZM3|ITSN2_HUMAN Intersectin-2 OS=Homo sapiens OX=9606 GN=ITSN2 PE=1 SV=3	1	65.0378	0.0116491	68.422	45.592	+	1	KQLQQELQEYQNKLIYLVPEKQLLNERIKNM	X;X;X;X;X;X;X;X;X;X;X;X;X;X;X;Phospho (STY);X;X;X;X;X;X;X;X;X;X;X;X;X;X;X	XXXXXXXXXXXXXPPPPPPPPXXXXXXXXXX	LIY(1)LVPEK	LIY(65.04)LVPEK	3	3	1.4528	---	---	2621	1052	553	553	4993	7209	20191113_Haura_KRAS-G12C_TMT-Batch3-H1792-pY_run2	18585	4991	7207	20191113_Haura_KRAS-G12C_TMT-Batch3-H1792-pY_run1	18419	4993	7209	20191113_Haura_KRAS-G12C_TMT-Batch3-H1792-pY_run2	18585	Phosphorylation (STY)	1	LIpYLVPEK	3,x	553,x	1	1	LIYLVPEK	LIpYLVPEK;Q9NZM3;KQLQQELQEYQNKLIYLVPEKQLLNERIKNM;3;1;3,x	ph_Q9NZM3:553
sp|P29317|EPHA2_HUMAN	sp|P29317|EPHA2_HUMAN	P29317	__Other	P29317	P29317	sp|P29317|EPHA2_HUMAN Ephrin type-A receptor 2 OS=Homo sapiens OX=9606 GN=EPHA2 PE=1 SV=2	0.989896	19.9111	9.43754e-05	153.05	105.3	+	1	GGKIPIRWTAPEAISYRKFTSASDVWSFGIV	X;X;X;X;X;X;X;X;X;X;X;X;X;X;X;Phospho (STY);X;X;X;X;X;X;X;X;X;X;X;X;X;X;X	XXXXXXXPPPPPPPPPPXXXXXXXXXXXXXX	WTAPEAIS(0.01)Y(0.99)R	WT(-128.79)APEAIS(-19.91)Y(19.91)R	9	2	-1.5295	---	---	1517	398	791	791	9749	13865	20191107_Haura_KRAS-G12C_TMT-Batch1-H358-pY_run1	14421	9749	13865	20191107_Haura_KRAS-G12C_TMT-Batch1-H358-pY_run1	14421	9749	13865	20191107_Haura_KRAS-G12C_TMT-Batch1-H358-pY_run1	14421	Phosphorylation (STY)	1	WTAPEAISpYR	9>>n	791>>n	0.99	0.99	WTAPEAISYR	WTAPEAISpYR;P29317;GGKIPIRWTAPEAISYRKFTSASDVWSFGIV;9;1;9>>n	ph_P29317:791
sp|P54792|DVLP1_HUMAN	sp|P54792|DVLP1_HUMAN	O14640;P54792	__Other	P54792	P54792	sp|P54792|DVLP1_HUMAN Putative segment polarity protein dishevelled homolog DVL1P1 OS=Homo sapiens OX=9606 GN=DVL1P1 PE=5 SV=1;sp|O14640|DVL1_HUMAN Segment polarity protein dishevelled homolog DVL-1 OS=Homo sapiens OX=9606 GN=DVL1 PE=1 SV=2	0.668604	3.10131	0.00864965	116.35	39.762	---	1	PISLTVAKCWDPTPRSYFTVPRPDPVRPIDP	X;X;X;X;X;X;X;X;X;X;X;X;X;X;X;Phospho (STY);X;X;X;X;X;X;X;X;X;X;X;X;X;X;X	XXXXXXXXXXXXXXXPPPPPPPXXXXXXXXX	S(0.669)Y(0.327)FT(0.004)VPR	S(3.1)Y(-3.1)FT(-22.2)VPR	1	2	0.62039	---	---	45	136	345	345	8097	11441	20191107_Haura_KRAS-G12C_TMT-Batch1-H358-pY_run2	12853	8097	11441	20191107_Haura_KRAS-G12C_TMT-Batch1-H358-pY_run2	12853	8097	11441	20191107_Haura_KRAS-G12C_TMT-Batch1-H358-pY_run2	12853	Phosphorylation (STY)	1	pSYFTVPR	1>>n	345>>n	0.669	0.669	SYFTVPR	pSYFTVPR;O14640;P54792;PISLTVAKCWDPTPRSYFTVPRPDPVRPIDP;1;1;1>>n	ph_P54792:345
sp|Q8TEW0|PARD3_HUMAN	sp|Q8TEW0|PARD3_HUMAN	Q8TEW0	__Other	Q8TEW0	Q8TEW0	sp|Q8TEW0|PARD3_HUMAN Partitioning defective 3 homolog OS=Homo sapiens OX=9606 GN=PARD3 PE=1 SV=2	0.996462	28.4214	2.07603e-05	104.2	82.322	+	1	EQQMKKQPPSEGPSNYDSYKKVQDPSYAPPK	X;X;X;X;X;X;X;X;X;X;X;X;X;X;X;Phospho (STY);X;X;X;X;X;X;X;X;X;X;X;X;X;X;X	XXXXXPPPPPPPPPPPPPPPXXXXXXXXXXX	KQPPSEGPS(0.001)NY(0.996)DS(0.001)Y(0.001)K	KQPPS(-40.9)EGPS(-32.27)NY(28.42)DS(-28.42)Y(-28.42)K	11	4	1.2256	---	---	2262	850	1310	1310	4559	6563	20191107_Haura_KRAS-G12C_TMT-Batch1-H358-pY_run2	10289	4561	6565	20191112_Haura_KRAS-G12C_TMT-Batch2-Calu1-pY_run2	10210	4561	6565	20191112_Haura_KRAS-G12C_TMT-Batch2-Calu1-pY_run2	10210	Phosphorylation (STY)	1	KQPPSEGPSNpYDSYK	11>>n	1310>>n	0.996	0.996	KQPPSEGPSNYDSYK	KQPPSEGPSNpYDSYK;Q8TEW0;EQQMKKQPPSEGPSNYDSYKKVQDPSYAPPK;11;1;11>>n	ph_Q8TEW0:1310
sp|P11413|G6PD_HUMAN	sp|P11413|G6PD_HUMAN	P11413	__Other	P11413	P11413	sp|P11413|G6PD_HUMAN Glucose-6-phosphate 1-dehydrogenase OS=Homo sapiens OX=9606 GN=G6PD PE=1 SV=4	0.973139	15.5905	0.000149634	150.61	117.2	+	1	ADELMKRVGFQYEGTYKWVNPHKL_______	X;X;X;X;X;X;X;X;X;X;X;X;X;X;X;Phospho (STY);X;X;X;X;X;X;X;X;X;X;X;X;X;X;X	XXXXXXXPPPPPPPPPPXXXXXXXXXXXXXX	VGFQYEGT(0.027)Y(0.973)K	VGFQY(-64.47)EGT(-15.59)Y(15.59)K	9	2	1.1392	---	---	1377	308	507	507	9077	12787	20191113_Haura_KRAS-G12C_TMT-Batch3-H1792-pY_run1	13838	9077	12787	20191113_Haura_KRAS-G12C_TMT-Batch3-H1792-pY_run1	13838	9077	12787	20191113_Haura_KRAS-G12C_TMT-Batch3-H1792-pY_run1	13838	Phosphorylation (STY)	1	VGFQYEGTpYK	9>>n	507>>n	0.973	0.973	VGFQYEGTYK	VGFQYEGTpYK;P11413;ADELMKRVGFQYEGTYKWVNPHKL_______;9;1;9>>n	ph_P11413:507
sp|Q13428|TCOF_HUMAN	sp|Q13428|TCOF_HUMAN	Q13428	__Other	Q13428	Q13428	sp|Q13428|TCOF_HUMAN Treacle protein OS=Homo sapiens OX=9606 GN=TCOF1 PE=1 SV=3	0.984342	17.9854	0.00623808	64.394	50.715	---	1	HPATGKTVANLLSGKSPRKSAEPSANTTLVS	X;X;X;X;X;X;X;X;X;X;X;X;X;X;X;Phospho (STY);X;X;X;X;X;X;X;X;X;X;X;X;X;X;X	XXXXXXPPPPPPPPPPPPXXXXXXXXXXXXX	TVANLLS(0.016)GKS(0.984)PR	T(-53.13)VANLLS(-17.99)GKS(17.99)PR	10	3	1.2735	---	---	284	609	156	156	8721	12253	20191107_Haura_KRAS-G12C_TMT-Batch1-H358-pY_run1	13547	8721	12253	20191107_Haura_KRAS-G12C_TMT-Batch1-H358-pY_run1	13547	8721	12253	20191107_Haura_KRAS-G12C_TMT-Batch1-H358-pY_run1	13547	Phosphorylation (STY)	1	TVANLLSGKpSPR	10>>n	156>>n	0.984	0.984	TVANLLSGKSPR	TVANLLSGKpSPR;Q13428;HPATGKTVANLLSGKSPRKSAEPSANTTLVS;10;1;10>>n	ph_Q13428:156
sp|Q9HB21|PKHA1_HUMAN	sp|Q9HB21|PKHA1_HUMAN	Q9HB21	__Other	Q9HB21	Q9HB21	sp|Q9HB21|PKHA1_HUMAN Pleckstrin homology domain-containing family A member 1 OS=Homo sapiens OX=9606 GN=PLEKHA1 PE=1 SV=2	0.999965	44.5028	0.000379103	142.64	104.4	+	1	SNSLVSTFTMEKRGFYESLAKVKPGNFKVQT	X;X;X;X;X;X;X;X;X;X;X;X;X;X;X;Phospho (STY);X;X;X;X;X;X;X;X;X;X;X;X;X;X;X	XXXXXXXXXXXXXPPPPPPPPXXXXXXXXXX	GFY(1)ESLAK	GFY(44.5)ES(-44.5)LAK	3	2	1.2092	---	---	2554	1006	345	345	2784	3857	20191107_Haura_KRAS-G12C_TMT-Batch1-H358-pY_run1	14239	2784	3857	20191107_Haura_KRAS-G12C_TMT-Batch1-H358-pY_run1	14239	2784	3857	20191107_Haura_KRAS-G12C_TMT-Batch1-H358-pY_run1	14239	Phosphorylation (STY)	1	GFpYESLAK	3>>n	345>>n	1	1	GFYESLAK	GFpYESLAK;Q9HB21;SNSLVSTFTMEKRGFYESLAKVKPGNFKVQT;3;1;3>>n	ph_Q9HB21:345
sp|P61020|RAB5B_HUMAN	sp|P61020|RAB5B_HUMAN	P20339;P51148;P61020	__Other	P61020	P61020	sp|P61020|RAB5B_HUMAN Ras-related protein Rab-5B OS=Homo sapiens OX=9606 GN=RAB5B PE=1 SV=1;sp|P20339|RAB5A_HUMAN Ras-related protein Rab-5A OS=Homo sapiens OX=9606 GN=RAB5A PE=1 SV=2;sp|P51148|RAB5C_HUMAN Ras-related protein Rab-5C OS=Homo sapiens OX=9606	0.999994	52.3822	2.35195e-07	175.91	138.72	+	1	TTVKFEIWDTAGQERYHSLAPMYYRGAQAAI	X;X;X;X;X;X;X;X;X;X;X;X;X;X;X;Phospho (STY);X;X;X;X;X;Oxidation (M);X;X;X;X;X;X;X;X;X	XXXXXXXXXXXXXXXPPPPPPPPPPXXXXXX	Y(1)HSLAPMYYR	Y(52.38)HS(-52.38)LAPMY(-153.51)Y(-162.44)R	1	3	-0.53483	---	---	1450	359	82	82	10028	14196	20191112_Haura_KRAS-G12C_TMT-Batch2-Calu1-pY_run1	11594	10029	14197	20191112_Haura_KRAS-G12C_TMT-Batch2-Calu1-pY_run2	11749	10029	14197	20191112_Haura_KRAS-G12C_TMT-Batch2-Calu1-pY_run2	11749	Phosphorylation (STY)	1	pYHSLAPMYYR	1>>n	82>>n	1	1	YHSLAPMYYR	pYHSLAPMYYR;P20339;P51148;P61020;TTVKFEIWDTAGQERYHSLAPMYYRGAQAAI;1;1;1>>n	ph_P61020:82
sp|Q969Q0|RL36L_HUMAN	sp|Q969Q0|RL36L_HUMAN	Q969Q0	__Other	Q969Q0	Q969Q0	sp|Q969Q0|RL36L_HUMAN 60S ribosomal protein L36a-like OS=Homo sapiens OX=9606 GN=RPL36AL PE=1 SV=3	0.984295	17.9708	0.0141741	65.038	41.481	+	1	QPHKVTQYKKGKDSLYAQGRRRYDRKQSGYG	X;X;X;X;X;X;X;X;X;X;X;X;X;X;X;Phospho (STY);X;X;X;X;X;X;X;X;X;X;X;X;X;X;X	XXXXXXXXXXXXPPPPPPPPXXXXXXXXXXX	DS(0.016)LY(0.984)AQGR	DS(-17.97)LY(17.97)AQGR	4	2	0.67111	---	---	2331	892	34	34	1541	2115	20191113_Haura_KRAS-G12C_TMT-Batch3-H1792-pY_run2	8506	1541	2115	20191113_Haura_KRAS-G12C_TMT-Batch3-H1792-pY_run2	8506	1541	2115	20191113_Haura_KRAS-G12C_TMT-Batch3-H1792-pY_run2	8506	Phosphorylation (STY)	1	DSLpYAQGR	4>>n	34>>n	0.984	0.984	DSLYAQGR	DSLpYAQGR;Q969Q0;QPHKVTQYKKGKDSLYAQGRRRYDRKQSGYG;4;1;4>>n	ph_Q969Q0:34
sp|Q13009|TIAM1_HUMAN	sp|Q13009|TIAM1_HUMAN	Q13009	__Other	Q13009	Q13009	sp|Q13009|TIAM1_HUMAN T-lymphoma invasion and metastasis-inducing protein 1 OS=Homo sapiens OX=9606 GN=TIAM1 PE=1 SV=2	1	78.9342	0.000146725	111.65	78.461	+	1	DSGSSSTGDAARQGVYENFRRELEMSTTNSE	X;X;X;X;X;X;X;X;X;X;X;X;X;X;X;Phospho (STY);X;X;X;X;X;X;X;X;X;X;X;X;X;X;X	XXXXXXXXXXXXPPPPPPPPPXXXXXXXXXX	QGVY(1)ENFRR	QGVY(78.93)ENFRR	4	3	-1.4569	---	---	1877	603	384	384	6383	9083	20191113_Haura_KRAS-G12C_TMT-Batch3-H1792-pY_run2	8749	6380	9080	20191107_Haura_KRAS-G12C_TMT-Batch1-H358-pY_run1	8884	6380	9080	20191107_Haura_KRAS-G12C_TMT-Batch1-H358-pY_run1	8884	Phosphorylation (STY)	1	QGVpYENFRR	4,x	384,x	1	1	QGVYENFRR	QGVpYENFRR;Q13009;DSGSSSTGDAARQGVYENFRRELEMSTTNSE;4;1;4,x	ph_Q13009:384
sp|P25705|ATPA_HUMAN	sp|P25705|ATPA_HUMAN	P25705	__Other	P25705	P25705	sp|P25705|ATPA_HUMAN ATP synthase subunit alpha, mitochondrial OS=Homo sapiens OX=9606 GN=ATP5F1A PE=1 SV=1	1	71.8775	0.000258471	97.86	72.159	+	1	RQMSLLLRRPPGREAYPGDVFYLHSRLLERA	X;X;X;X;X;X;X;X;X;X;X;X;X;X;X;Phospho (STY);X;X;X;X;X;X;X;X;X;X;X;X;X;X;X	XXXXXXXXXXXXXPPPPPPPPPPPPPXXXXX	EAY(1)PGDVFYLHSR	EAY(71.88)PGDVFY(-71.88)LHS(-94.66)R	3	3	0.58933	---	---	1489	384	337	337	1759	2380	20191113_Haura_KRAS-G12C_TMT-Batch3-H1792-pY_run1	13531	1759	2380	20191113_Haura_KRAS-G12C_TMT-Batch3-H1792-pY_run1	13531	1757	2378	20191107_Haura_KRAS-G12C_TMT-Batch1-H358-pY_run1	13694	Phosphorylation (STY)	1	EApYPGDVFYLHSR	3>>n	337>>n	1	1	EAYPGDVFYLHSR	EApYPGDVFYLHSR;P25705;RQMSLLLRRPPGREAYPGDVFYLHSRLLERA;3;1;3>>n	ph_P25705:337
sp|Q9UJV3|TRIM1_HUMAN	sp|Q9UJV3|TRIM1_HUMAN	Q9UJV3	__Other	Q9UJV3	Q9UJV3	sp|Q9UJV3|TRIM1_HUMAN Probable E3 ubiquitin-protein ligase MID2 OS=Homo sapiens OX=9606 GN=MID2 PE=1 SV=3	0.80891	7.05647	0.0176875	41.554	25.432	---	1	YPERQECNCRPQESPYVSGMKTCH_______	X;X;X;X;X;X;X;X;X;X;X;X;X;X;X;Phospho (STY);X;X;X;X;X;X;X;X;X;X;X;X;X;X;X	XXXXPPPPPPPPPPPPPPPPPXXXXXXXXXX	QECNCRPQES(0.032)PY(0.809)VS(0.159)GMK	QECNCRPQES(-14.06)PY(7.06)VS(-7.06)GMK	12	3	0.60416	---	---	2663	1079	727	727	6278	8946	20191107_Haura_KRAS-G12C_TMT-Batch1-H358-pY_run2	9947	6278	8946	20191107_Haura_KRAS-G12C_TMT-Batch1-H358-pY_run2	9947	6278	8946	20191107_Haura_KRAS-G12C_TMT-Batch1-H358-pY_run2	9947	Phosphorylation (STY)	1	QECNCRPQESPpYVSGMK	12>>n	727>>n	0.809	0.809	QECNCRPQESPYVSGMK	QECNCRPQESPpYVSGMK;Q9UJV3;YPERQECNCRPQESPYVSGMKTCH_______;12;1;12>>n	ph_Q9UJV3:727
sp|Q9NWQ8|PHAG1_HUMAN	sp|Q9NWQ8|PHAG1_HUMAN	Q9NWQ8	__Other	Q9NWQ8	Q9NWQ8	sp|Q9NWQ8|PHAG1_HUMAN Phosphoprotein associated with glycosphingolipid-enriched microdomains 1 OS=Homo sapiens OX=9606 GN=PAG1 PE=1 SV=2	0.999222	33.5626	2.17144e-36	217.17	196.32	+	1	LVNKSGQSLTVPESTYTSIQGDPQRSPSSCN	X;X;X;X;X;X;X;X;X;X;X;X;X;X;X;Phospho (STY);X;X;X;X;X;X;X;X;X;X;X;Phospho (STY);X;X;X	XXXXPPPPPPPPPPPPPPPPPPPPPPPPPPP	SGQSLTVPESTY(0.999)TSIQGDPQR	S(-158.42)GQS(-155)LT(-143.89)VPES(-50.43)T(-36.07)Y(33.56)T(-33.56)S(-40.84)IQGDPQR	12	3	-1.119	---	---	2606	1041	341	341	7173	10123	20191113_Haura_KRAS-G12C_TMT-Batch3-H1792-pY_run1	12647	7175	10128	20191113_Haura_KRAS-G12C_TMT-Batch3-H1792-pY_run2	12718	7175	10128	20191113_Haura_KRAS-G12C_TMT-Batch3-H1792-pY_run2	12718	Phosphorylation (STY)	1	SGQSLTVPESTpYTSIQGDPQR	12>>n	341>>n	0.999	0.999	SGQSLTVPESTYTSIQGDPQR	SGQSLTVPESTpYTSIQGDPQR;Q9NWQ8;LVNKSGQSLTVPESTYTSIQGDPQRSPSSCN;12;1;12>>n	ph_Q9NWQ8:341
sp|O00264|PGRC1_HUMAN	sp|O00264|PGRC1_HUMAN	O00264	__Other	O00264	O00264	sp|O00264|PGRC1_HUMAN Membrane-associated progesterone receptor component 1 OS=Homo sapiens OX=9606 GN=PGRMC1 PE=1 SV=3	0.684728	4.05355	0.00382097	53.278	45.739	---	1	HVGKLLKEGEEPTVYSDEEEPKDESARKND_	X;X;X;X;X;X;X;X;X;X;X;X;X;X;X;Phospho (STY);X;X;X;X;X;X;X;X;X;X;X;X;X;X;X	XXXXXXXPPPPPPPPPPPPPPPPPPPPXXXX	EGEEPT(0.046)VY(0.269)S(0.685)DEEEPKDESAR	EGEEPT(-11.74)VY(-4.05)S(4.05)DEEEPKDES(-36.33)AR	9	3	0.51002	---	---	42	126	181	181	1871	2528	20191113_Haura_KRAS-G12C_TMT-Batch3-H1792-pY_run1	10388	1872	2529	20191113_Haura_KRAS-G12C_TMT-Batch3-H1792-pY_run2	10452	1872	2529	20191113_Haura_KRAS-G12C_TMT-Batch3-H1792-pY_run2	10452	Phosphorylation (STY)	1	EGEEPTVYpSDEEEPKDESAR	9>>n	181>>n	0.685	0.685	EGEEPTVYSDEEEPKDESAR	EGEEPTVYpSDEEEPKDESAR;O00264;HVGKLLKEGEEPTVYSDEEEPKDESARKND_;9;1;9>>n	ph_O00264:181
sp|Q9Y230|RUVB2_HUMAN	sp|Q9Y230|RUVB2_HUMAN	Q9Y230	__Other	Q9Y230	Q9Y230	sp|Q9Y230|RUVB2_HUMAN RuvB-like 2 OS=Homo sapiens OX=9606 GN=RUVBL2 PE=1 SV=3	1	84.1113	0.00120964	129.37	100.28	+	1	GKISKLGRSFTRARDYDAMGSQTKFVQCPDG	X;X;X;X;X;X;X;X;X;X;X;X;X;X;X;Phospho (STY);X;X;X;X;X;X;X;X;X;X;X;X;X;X;X	XXXXXXXXXXXXPPPPPPPPPPPPXXXXXXX	ARDY(1)DAMGSQTK	ARDY(84.11)DAMGS(-84.11)QT(-121.64)K	4	3	-0.35563	---	---	2714	1110	215	215	678	975	20191113_Haura_KRAS-G12C_TMT-Batch3-H1792-pY_run2	8408	678	975	20191113_Haura_KRAS-G12C_TMT-Batch3-H1792-pY_run2	8408	678	975	20191113_Haura_KRAS-G12C_TMT-Batch3-H1792-pY_run2	8408	Phosphorylation (STY)	1	ARDpYDAMGSQTK	4>>n	215>>n	1	1	ARDYDAMGSQTK	ARDpYDAMGSQTK;Q9Y230;GKISKLGRSFTRARDYDAMGSQTKFVQCPDG;4;1;4>>n	ph_Q9Y230:215
sp|O43155|FLRT2_HUMAN	sp|O43155|FLRT2_HUMAN	O43155	__Other	O43155	O43155	sp|O43155|FLRT2_HUMAN Leucine-rich repeat transmembrane protein FLRT2 OS=Homo sapiens OX=9606 GN=FLRT2 PE=1 SV=1	1	67.4858	0.000931936	82.362	55.333	+	1	TSQKWKYNRGRRKDDYCEAGTKKDNSILEMT	X;X;X;X;X;X;X;X;X;X;X;X;X;X;X;Phospho (STY);X;X;X;X;X;X;X;X;X;X;X;X;X;X;X	XXXXXXXXXXXPPPPPPPPPPPPXXXXXXXX	RKDDY(1)CEAGTK	RKDDY(67.49)CEAGT(-67.49)K	5	4	2.1989	---	---	1105	158	588	588	6713	9470	20191112_Haura_KRAS-G12C_TMT-Batch2-Calu1-pY_run2	7327	6713	9470	20191112_Haura_KRAS-G12C_TMT-Batch2-Calu1-pY_run2	7327	6712	9469	20191112_Haura_KRAS-G12C_TMT-Batch2-Calu1-pY_run1	7232	Phosphorylation (STY)	1	RKDDpYCEAGTK	5>>n	588>>n	1	1	RKDDYCEAGTK	RKDDpYCEAGTK;O43155;TSQKWKYNRGRRKDDYCEAGTKKDNSILEMT;5;1;5>>n	ph_O43155:588
sp|P49914|MTHFS_HUMAN	sp|P49914|MTHFS_HUMAN	P49914	__Other	P49914	P49914	sp|P49914|MTHFS_HUMAN 5-formyltetrahydrofolate cyclo-ligase OS=Homo sapiens OX=9606 GN=MTHFS PE=1 SV=2	0.929449	11.1972	0.00838774	51.774	38.111	+	1	IKDIFQRGKICFIPRYRFQSNHMDMVRIESP	X;X;X;X;X;X;X;X;X;X;X;X;X;X;X;Phospho (STY);X;X;X;X;X;X;X;X;X;X;X;X;X;X;X	XXXXXXXXXXXXXXXPPPPPPPPPPPPXXXX	Y(0.929)RFQS(0.071)NHMDMVR	Y(11.2)RFQS(-11.2)NHMDMVR	1	4	-2.2628	---	---	1627	461	83	83	10275	14526	20191113_Haura_KRAS-G12C_TMT-Batch3-H1792-pY_run1	7835	10275	14526	20191113_Haura_KRAS-G12C_TMT-Batch3-H1792-pY_run1	7835	10275	14526	20191113_Haura_KRAS-G12C_TMT-Batch3-H1792-pY_run1	7835	Phosphorylation (STY)	1	pYRFQSNHMDMVR	1>>n	83>>n	0.929	0.929	YRFQSNHMDMVR	pYRFQSNHMDMVR;P49914;IKDIFQRGKICFIPRYRFQSNHMDMVRIESP;1;1;1>>n	ph_P49914:83
sp|Q05397|FAK1_HUMAN	sp|Q05397|FAK1_HUMAN	Q05397	__Other	Q05397	Q05397	sp|Q05397|FAK1_HUMAN Focal adhesion kinase 1 OS=Homo sapiens OX=9606 GN=PTK2 PE=1 SV=2	0.999338	34.8273	2.5436e-22	223.83	175.41	+	1;2	KLGDFGLSRYMEDSTYYKASKGKLPIKWMAP	X;X;X;X;X;X;X;X;X;Phospho (STY);Oxidation (M);X;X;Phospho (STY);Phospho (STY);Phospho (STY);Phospho (STY);X;X;X;X;X;X;X;X;X;X;X;X;X;X	XXXXXXXXXPPPPPPPPPPPPXXXXXXXXXX	YMEDSTY(0.999)YK	Y(-83.11)MEDS(-54.14)T(-34.83)Y(34.83)Y(-34.83)K	7	3	0.018885	---	---	1801	567	576	576	10127	14302	20191107_Haura_KRAS-G12C_TMT-Batch1-H358-pY_run2	11311	10156	14369	20191107_Haura_KRAS-G12C_TMT-Batch1-H358-pY_run1	12977	10195	14433	20191113_Haura_KRAS-G12C_TMT-Batch3-H1792-pY_run1	11653	Phosphorylation (STY)	1	YMEDSTpYYK	7>>n	576>>n	0.999	0.999	YMEDSTYYK	YMEDSTpYYK;Q05397;KLGDFGLSRYMEDSTYYKASKGKLPIKWMAP;7;1;7>>n	ph_Q05397:576
sp|Q8IVH8|M4K3_HUMAN	sp|Q8IVH8|M4K3_HUMAN	Q8IVH8	__Other	Q8IVH8	Q8IVH8	sp|Q8IVH8|M4K3_HUMAN Mitogen-activated protein kinase kinase kinase kinase 3 OS=Homo sapiens OX=9606 GN=MAP4K3 PE=1 SV=1	0.822564	6.81582	6.03231e-26	147.26	127.89	+	1	ELPDSDGFLDSSEEIYYTARSNLDLQLEYGQ	X;X;X;X;X;X;X;X;X;X;X;X;X;X;X;Phospho (STY);X;X;X;X;X;X;X;X;X;X;X;X;X;X;X	PPPPPPPPPPPPPPPPPPPPXXXXXXXXXXX	ETEPHHELPDSDGFLDSSEEIY(0.823)Y(0.171)T(0.006)AR	ET(-140.97)EPHHELPDS(-116.67)DGFLDS(-78.19)S(-57.54)EEIY(6.82)Y(-6.82)T(-21.23)AR	22	4	-2.0617	---	---	2167	788	366	366	2230	2996	20191112_Haura_KRAS-G12C_TMT-Batch2-Calu1-pY_run1	14187	2230	2996	20191112_Haura_KRAS-G12C_TMT-Batch2-Calu1-pY_run1	14187	2230	2996	20191112_Haura_KRAS-G12C_TMT-Batch2-Calu1-pY_run1	14187	Phosphorylation (STY)	1	ETEPHHELPDSDGFLDSSEEIpYYTAR	22>>n	366>>n	0.823	0.823	ETEPHHELPDSDGFLDSSEEIYYTAR	ETEPHHELPDSDGFLDSSEEIpYYTAR;Q8IVH8;ELPDSDGFLDSSEEIYYTARSNLDLQLEYGQ;22;1;22>>n	ph_Q8IVH8:366
sp|Q8WZ64|ARAP2_HUMAN	sp|Q8WZ64|ARAP2_HUMAN	Q8WZ64	__Other	Q8WZ64	Q8WZ64	sp|Q8WZ64|ARAP2_HUMAN Arf-GAP with Rho-GAP domain, ANK repeat and PH domain-containing protein 2 OS=Homo sapiens OX=9606 GN=ARAP2 PE=1 SV=3	1	84.2893	0.000605113	136.99	101.57	+	1	KQLQIILSKMQDIPIYANVHKTKKNDDPSKD	X;X;X;X;X;X;X;X;X;Oxidation (M);X;X;X;X;X;Phospho (STY);X;X;X;X;X;X;X;X;X;X;X;X;X;X;X	XXXXXXXXXPPPPPPPPPPPPXXXXXXXXXX	MQDIPIY(1)ANVHK	MQDIPIY(84.29)ANVHK	7	3	1.3932	---	---	2300	870	77	77	5614	8047	20191113_Haura_KRAS-G12C_TMT-Batch3-H1792-pY_run2	14018	5611	8044	20191112_Haura_KRAS-G12C_TMT-Batch2-Calu1-pY_run1	14047	5611	8044	20191112_Haura_KRAS-G12C_TMT-Batch2-Calu1-pY_run1	14047	Phosphorylation (STY)	1	MQDIPIpYANVHK	7,x	77,x	1	1	MQDIPIYANVHK	MQDIPIpYANVHK;Q8WZ64;KQLQIILSKMQDIPIYANVHKTKKNDDPSKD;7;1;7,x	ph_Q8WZ64:77
sp|O43491|E41L2_HUMAN	sp|O43491|E41L2_HUMAN	O43491	__Other	O43491	O43491	sp|O43491|E41L2_HUMAN Band 4.1-like protein 2 OS=Homo sapiens OX=9606 GN=EPB41L2 PE=1 SV=1	1	179.358	8.93563e-68	266.74	204.77	+	1;2	IEGKKNSLRVEGDNIYVRHSNLMLEELDKAQ	X;X;X;X;X;X;Phospho (STY);X;X;X;X;X;X;X;X;Phospho (STY);X;X;X;X;X;X;X;X;X;X;X;X;X;X;X	XXXXPPPPPPPPPPPPPPXXXXXXXXXXXXX	VEGDNIY(1)VR	VEGDNIY(179.36)VR	7	2	-0.80006	---	---	1115	164	623	623	8985	12649	20191113_Haura_KRAS-G12C_TMT-Batch3-H1792-pY_run2	11616	5988	8550	20191112_Haura_KRAS-G12C_TMT-Batch2-Calu1-pY_run1	11800	5988	8550	20191112_Haura_KRAS-G12C_TMT-Batch2-Calu1-pY_run1	11800	Phosphorylation (STY)	1	VEGDNIpYVR	7,x	623,x	1	1	VEGDNIYVR	VEGDNIpYVR;O43491;IEGKKNSLRVEGDNIYVRHSNLMLEELDKAQ;7;1;7,x	ph_O43491:623
sp|Q9NP61|ARFG3_HUMAN	sp|Q9NP61|ARFG3_HUMAN	Q9NP61	__Other	Q9NP61	Q9NP61	sp|Q9NP61|ARFG3_HUMAN ADP-ribosylation factor GTPase-activating protein 3 OS=Homo sapiens OX=9606 GN=ARFGAP3 PE=1 SV=1	0.99134	20.6517	0.00731646	65.305	34.232	+	1	AISSDMYFGRQSQADYETRARLERLSASSSI	X;X;X;X;X;X;X;X;X;X;X;X;X;X;X;Phospho (STY);X;X;X;X;X;X;X;X;X;X;X;X;X;X;X	XXXXXXXXXXPPPPPPPPPXXXXXXXXXXXX	QSQADY(0.991)ET(0.009)R	QS(-38.9)QADY(20.65)ET(-20.65)R	6	2	0.078597	---	---	2572	1014	441	441	6570	9311	20191112_Haura_KRAS-G12C_TMT-Batch2-Calu1-pY_run1	5856	6571	9312	20191112_Haura_KRAS-G12C_TMT-Batch2-Calu1-pY_run2	5928	6571	9312	20191112_Haura_KRAS-G12C_TMT-Batch2-Calu1-pY_run2	5928	Phosphorylation (STY)	1	QSQADpYETR	6>>n	441>>n	0.991	0.991	QSQADYETR	QSQADpYETR;Q9NP61;AISSDMYFGRQSQADYETRARLERLSASSSI;6;1;6>>n	ph_Q9NP61:441
REV__sp|P16885|PLCG2_HUMAN	REV__sp|P16885|PLCG2_HUMAN	---	__REV	REV__P16885	REV__P16885	---	1	51.9953	0.0442094	51.995	21.383	---	2	---	X;X;X;X;X;X;X;X;X;X;X;X;X;X;Phospho (STY);Phospho (STY);X;X;X;X;X;X;X;X;X;X;X;X;X;X;X	XXXXXXXXXXPPPPPPPPPPXXXXXXXXXXX	IDAKT(1)S(1)WAVR	IDAKT(52)S(52)WAVR	6	2	0.12531	+	---	15	28	1211	1211	3843	5374	20191107_Haura_KRAS-G12C_TMT-Batch1-H358-pY_run1	13651	3843	5374	20191107_Haura_KRAS-G12C_TMT-Batch1-H358-pY_run1	13651	3843	5374	20191107_Haura_KRAS-G12C_TMT-Batch1-H358-pY_run1	13651	Phosphorylation (STY)	2	IDAKpTpSWAVR	5,6,x	1210,1211,x	1	1	IDAKTSWAVR	IDAKpTpSWAVR;---;---;6;2;5,6,x	ph_REV__P16885:1211
REV__sp|P16885|PLCG2_HUMAN	REV__sp|P16885|PLCG2_HUMAN	---	__REV	REV__P16885	REV__P16885	---	1	51.9953	0.0442094	51.995	21.383	---	2	---	X;X;X;X;X;X;X;X;X;X;X;X;X;X;X;Phospho (STY);Phospho (STY);X;X;X;X;X;X;X;X;X;X;X;X;X;X	XXXXXXXXXXXPPPPPPPPPPXXXXXXXXXX	IDAKT(1)S(1)WAVR	IDAKT(52)S(52)WAVR	5	2	0.12531	+	---	609	28	1210	1210	3843	5374	20191107_Haura_KRAS-G12C_TMT-Batch1-H358-pY_run1	13651	3843	5374	20191107_Haura_KRAS-G12C_TMT-Batch1-H358-pY_run1	13651	3843	5374	20191107_Haura_KRAS-G12C_TMT-Batch1-H358-pY_run1	13651	Phosphorylation (STY)	2	IDAKpTpSWAVR	5,6,x	1210,1211,x	1	1	IDAKTSWAVR	IDAKpTpSWAVR;---;---;5;2;5,6,x	ph_REV__P16885:1210
sp|P61604|CH10_HUMAN	sp|P61604|CH10_HUMAN	P61604	__Other	P61604	P61604	sp|P61604|CH10_HUMAN 10 kDa heat shock protein, mitochondrial OS=Homo sapiens OX=9606 GN=HSPE1 PE=1 SV=2	0.513093	0.227493	0.001134	85.958	58.629	---	1	SVKVGDKVLLPEYGGTKVVLDDKDYFLFRDG	X;X;X;X;X;X;X;X;X;X;X;X;X;X;X;Phospho (STY);X;X;X;X;X;X;X;X;X;X;X;X;X;X;X	XXXXXXXPPPPPPPPPPXXXXXXXXXXXXXX	VLLPEY(0.487)GGT(0.513)K	VLLPEY(-0.23)GGT(0.23)K	9	2	2.1418	---	---	750	509	79	79	9324	13250	20191107_Haura_KRAS-G12C_TMT-Batch1-H358-pY_run1	14943	9324	13250	20191107_Haura_KRAS-G12C_TMT-Batch1-H358-pY_run1	14943	9324	13250	20191107_Haura_KRAS-G12C_TMT-Batch1-H358-pY_run1	14943	Phosphorylation (STY)	1	VLLPEYGGpTK	9,n	79,n	0.513	0.513	VLLPEYGGTK	VLLPEYGGpTK;P61604;SVKVGDKVLLPEYGGTKVVLDDKDYFLFRDG;9;1;9,n	ph_P61604:79
sp|Q8TEW8|PAR3L_HUMAN	sp|Q8TEW8|PAR3L_HUMAN	Q8TEW8	__Other	Q8TEW8	Q8TEW8	sp|Q8TEW8|PAR3L_HUMAN Partitioning defective 3 homolog B OS=Homo sapiens OX=9606 GN=PARD3B PE=1 SV=2	0.996736	24.8483	4.6065e-20	163.27	137.68	+	1	FPLYEDDEGRARPSEYDLLWVPGRGPDGNAH	X;X;X;X;X;X;X;X;X;X;X;X;X;X;X;Phospho (STY);X;X;X;X;X;X;X;X;X;X;X;X;X;X;X	XXXXXXXXXXPPPPPPPPPPPPPPPPPPPPP	ARPS(0.003)EY(0.997)DLLWVPGR	ARPS(-24.85)EY(24.85)DLLWVPGR	6	3	-0.66221	---	---	2267	851	1056	1056	688	986	20191112_Haura_KRAS-G12C_TMT-Batch2-Calu1-pY_run1	15314	688	986	20191112_Haura_KRAS-G12C_TMT-Batch2-Calu1-pY_run1	15314	693	991	20191112_Haura_KRAS-G12C_TMT-Batch2-Calu1-pY_run1	12623	Phosphorylation (STY)	1	ARPSEpYDLLWVPGR	6>>n	1056>>n	0.997	0.997	ARPSEYDLLWVPGR	ARPSEpYDLLWVPGR;Q8TEW8;FPLYEDDEGRARPSEYDLLWVPGRGPDGNAH;6;1;6>>n	ph_Q8TEW8:1056
sp|Q8N4C8|MINK1_HUMAN	sp|Q8N4C8|MINK1_HUMAN	Q8N4C8	__Other	Q8N4C8	Q8N4C8	sp|Q8N4C8|MINK1_HUMAN Misshapen-like kinase 1 OS=Homo sapiens OX=9606 GN=MINK1 PE=1 SV=2	0.999924	42.8804	8.99992e-07	107.98	97.877	+	1	NSKGQSPPSKDGSGDYQSRGLVKAPGKSSFT	X;X;X;X;X;X;X;X;X;X;X;X;X;X;X;Phospho (STY);X;X;X;X;X;X;X;X;X;X;X;X;X;X;X	XXXPPPPPPPPPPPPPPPPXXXXXXXXXXXX	DGSGDY(1)QSR	DGS(-42.88)GDY(42.88)QS(-46.08)R	6	2	1.2693	---	---	2201	814	937	937	1203	1635	20191112_Haura_KRAS-G12C_TMT-Batch2-Calu1-pY_run1	5139	3106	4293	20191112_Haura_KRAS-G12C_TMT-Batch2-Calu1-pY_run2	7051	3106	4293	20191112_Haura_KRAS-G12C_TMT-Batch2-Calu1-pY_run2	7051	Phosphorylation (STY)	1	DGSGDpYQSR	6>>n	937>>n	1	1	DGSGDYQSR	DGSGDpYQSR;Q8N4C8;NSKGQSPPSKDGSGDYQSRGLVKAPGKSSFT;6;1;6>>n	ph_Q8N4C8:937
sp|Q10469|MGAT2_HUMAN	sp|Q10469|MGAT2_HUMAN	Q10469	__Other	Q10469	Q10469	sp|Q10469|MGAT2_HUMAN Alpha-1,6-mannosyl-glycoprotein 2-beta-N-acetylglucosaminyltransferase OS=Homo sapiens OX=9606 GN=MGAT2 PE=1 SV=1	0.651647	2.71992	0.00758784	58.172	29.196	+	1	CDVLSLGTYSASRSFYGMADKVDVKTWKSTE	X;X;X;X;X;X;X;X;X;X;X;X;X;X;X;Phospho (STY);X;X;X;X;X;X;X;X;X;X;X;X;X;X;X	XXXXXXXXXXXXXPPPPPPPPPPPPXXXXXX	S(0.348)FY(0.652)GMADKVDVK	S(-2.72)FY(2.72)GMADKVDVK	3	3	3.0053	---	---	1857	590	301	301	7117	10056	20191113_Haura_KRAS-G12C_TMT-Batch3-H1792-pY_run2	14495	7117	10056	20191113_Haura_KRAS-G12C_TMT-Batch3-H1792-pY_run2	14495	7117	10056	20191113_Haura_KRAS-G12C_TMT-Batch3-H1792-pY_run2	14495	Phosphorylation (STY)	1	SFpYGMADKVDVK	3>n	301>n	0.652	0.652	SFYGMADKVDVK	SFpYGMADKVDVK;Q10469;CDVLSLGTYSASRSFYGMADKVDVKTWKSTE;3;1;3>n	ph_Q10469:301
sp|Q9BYM8|HOIL1_HUMAN	sp|Q9BYM8|HOIL1_HUMAN	Q9BYM8	__Other	Q9BYM8	Q9BYM8	sp|Q9BYM8|HOIL1_HUMAN RanBP-type and C3HC4-type zinc finger-containing protein 1 OS=Homo sapiens OX=9606 GN=RBCK1 PE=1 SV=2	1	123.189	1.18142e-11	127.22	105.41	+	1	LRQYQQRKQQQQEGNYLQHVQLDQRSLVLNT	X;X;X;X;X;X;X;X;X;X;X;X;X;X;X;Phospho (STY);X;X;X;X;X;X;X;X;X;X;X;X;X;X;X	XXXXXXXPPPPPPPPPPPPPPPPPPXXXXXX	KQQQQEGNY(1)LQHVQLDQR	KQQQQEGNY(123.19)LQHVQLDQR	9	4	0.85146	---	---	2485	966	262	262	4569	6573	20191112_Haura_KRAS-G12C_TMT-Batch2-Calu1-pY_run2	9782	4568	6572	20191112_Haura_KRAS-G12C_TMT-Batch2-Calu1-pY_run1	9620	4568	6572	20191112_Haura_KRAS-G12C_TMT-Batch2-Calu1-pY_run1	9620	Phosphorylation (STY)	1	KQQQQEGNpYLQHVQLDQR	9,x	262,x	1	1	KQQQQEGNYLQHVQLDQR	KQQQQEGNpYLQHVQLDQR;Q9BYM8;LRQYQQRKQQQQEGNYLQHVQLDQRSLVLNT;9;1;9,x	ph_Q9BYM8:262
sp|P23396|RS3_HUMAN	sp|P23396|RS3_HUMAN	P23396	__Other	P23396	P23396	sp|P23396|RS3_HUMAN 40S ribosomal protein S3 OS=Homo sapiens OX=9606 GN=RPS3 PE=1 SV=2	1	86.3437	0.000180923	114.67	66.494	+	1	LRYKLLGGLAVRRACYGVLRFIMESGAKGCE	X;X;X;X;X;X;X;X;X;X;X;X;X;X;X;Phospho (STY);X;X;X;X;X;X;X;X;X;X;X;X;X;X;X	XXXXXXXXXXXXXPPPPPPPXXXXXXXXXXX	ACY(1)GVLR	ACY(86.34)GVLR	3	2	-0.4201	---	---	1479	375	120	120	88	104	20191113_Haura_KRAS-G12C_TMT-Batch3-H1792-pY_run2	10513	85	101	20191107_Haura_KRAS-G12C_TMT-Batch1-H358-pY_run1	10659	87	103	20191113_Haura_KRAS-G12C_TMT-Batch3-H1792-pY_run1	10447	Phosphorylation (STY)	1	ACpYGVLR	3,x	120,x	1	1	ACYGVLR	ACpYGVLR;P23396;LRYKLLGGLAVRRACYGVLRFIMESGAKGCE;3;1;3,x	ph_P23396:120
sp|P45984|MK09_HUMAN	sp|P45984|MK09_HUMAN	P45984	__Other	P45984	P45984	sp|P45984|MK09_HUMAN Mitogen-activated protein kinase 9 OS=Homo sapiens OX=9606 GN=MAPK9 PE=1 SV=2	0.642656	2.70805	0.00531489	56.482	51.933	---	1	ARTACTNFMMTPYVVTRYYRAPEVILGMGYK	X;X;X;X;X;X;X;X;Oxidation (M);X;X;X;X;X;X;Phospho (STY);X;X;X;X;X;X;X;X;X;X;X;X;X;X;X	XXPPPPPPPPPPPPPPPXXXXXXXXXXXXXX	TACTNFMMT(0.013)PY(0.344)VVT(0.643)R	T(-52.08)ACT(-44.19)NFMMT(-17)PY(-2.71)VVT(2.71)R	14	2	0.043698	---	---	724	444	188	188	8202	11583	20191113_Haura_KRAS-G12C_TMT-Batch3-H1792-pY_run2	16438	8185	11560	20191113_Haura_KRAS-G12C_TMT-Batch3-H1792-pY_run1	15486	8185	11560	20191113_Haura_KRAS-G12C_TMT-Batch3-H1792-pY_run1	15486	Phosphorylation (STY)	1	TACTNFMMTPYVVpTR	14>n	188>n	0.643	0.643	TACTNFMMTPYVVTR	TACTNFMMTPYVVpTR;P45984;ARTACTNFMMTPYVVTRYYRAPEVILGMGYK;14;1;14>n	ph_P45984:188
sp|P53701|CCHL_HUMAN	sp|P53701|CCHL_HUMAN	P53701	__Other	P53701	P53701	sp|P53701|CCHL_HUMAN Cytochrome c-type heme lyase OS=Homo sapiens OX=9606 GN=HCCS PE=1 SV=1	0.973643	15.6751	0.00112699	83.005	42.018	+	1	KKTYSVPAHQERAYEYVECPIRGTAAENKEN	X;X;X;X;X;X;X;X;X;X;X;X;X;X;X;Phospho (STY);X;X;X;X;X;X;X;X;X;X;X;X;X;X;X	XXXXXXXXXXXXPPPPPPPPPPXXXXXXXXX	AY(0.026)EY(0.974)VECPIR	AY(-15.68)EY(15.68)VECPIR	4	2	0.29647	---	---	1649	480	63	63	939	1318	20191112_Haura_KRAS-G12C_TMT-Batch2-Calu1-pY_run2	13433	941	1320	20191113_Haura_KRAS-G12C_TMT-Batch3-H1792-pY_run2	13326	941	1320	20191113_Haura_KRAS-G12C_TMT-Batch3-H1792-pY_run2	13326	Phosphorylation (STY)	1	AYEpYVECPIR	4>>n	63>>n	0.974	0.974	AYEYVECPIR	AYEpYVECPIR;P53701;KKTYSVPAHQERAYEYVECPIRGTAAENKEN;4;1;4>>n	ph_P53701:63
sp|P07948|LYN_HUMAN	sp|P07948|LYN_HUMAN	P07948	__Other	P07948	P07948	sp|P07948|LYN_HUMAN Tyrosine-protein kinase Lyn OS=Homo sapiens OX=9606 GN=LYN PE=1 SV=3	0.999934	42.4408	1.81743e-49	257.13	210.71	+	1	VIKHYKIRSLDNGGYYISPRITFPCISDMIK	X;X;X;X;X;X;X;X;X;X;X;X;X;X;X;Phospho (STY);X;X;X;X;X;X;X;X;X;X;X;X;X;X;X	XXXXXXXXPPPPPPPPPPPPXXXXXXXXXXX	SLDNGGYY(1)ISPR	S(-162.77)LDNGGY(-42.44)Y(42.44)IS(-50.33)PR	8	2	-1.0347	---	---	1316	278	194	194	7333	10317	20191107_Haura_KRAS-G12C_TMT-Batch1-H358-pY_run1	12978	7339	10333	20191113_Haura_KRAS-G12C_TMT-Batch3-H1792-pY_run2	12901	7339	10333	20191113_Haura_KRAS-G12C_TMT-Batch3-H1792-pY_run2	12901	Phosphorylation (STY)	1	SLDNGGYpYISPR	8>>n	194>>n	1	1	SLDNGGYYISPR	SLDNGGYpYISPR;P07948;VIKHYKIRSLDNGGYYISPRITFPCISDMIK;8;1;8>>n	ph_P07948:194
REV__sp|Q6P179|ERAP2_HUMAN	REV__sp|Q6P179|ERAP2_HUMAN	---	__REV	REV__Q6P179	REV__Q6P179	---	0.5	0	0.039164	46.566	11.466	+	1	---	X;X;X;X;X;X;X;X;X;X;X;X;X;X;X;Phospho (STY);X;X;X;X;X;X;X;X;X;X;X;X;X;X;X	XXXXXXXXXXXXXXXPPPPPPPXXXXXXXXX	Y(0.5)EY(0.5)FDLK	Y(0)EY(0)FDLK	1	2	1.1019	+	---	998	56	649	649	9891	14032	20191107_Haura_KRAS-G12C_TMT-Batch1-H358-pY_run2	19931	9891	14032	20191107_Haura_KRAS-G12C_TMT-Batch1-H358-pY_run2	19931	9891	14032	20191107_Haura_KRAS-G12C_TMT-Batch1-H358-pY_run2	19931	Phosphorylation (STY)	1	pYEYFDLK	1,n	649,n	0.5	0.5	YEYFDLK	pYEYFDLK;---;---;1;1;1,n	ph_REV__Q6P179:649
REV__sp|Q6P179|ERAP2_HUMAN	REV__sp|Q6P179|ERAP2_HUMAN	---	__REV	REV__Q6P179	REV__Q6P179	---	0.5	0	0.039164	46.566	11.466	+	1	---	X;X;X;X;X;X;X;X;X;X;X;X;X;X;X;X;X;X;X;X;X;X;X;X;X;X;X;X;X;X;X	XXXXXXXXXXXXXXXXXXXXXXXXXXXXXXX	Y(0.5)EY(0.5)FDLK	Y(0)EY(0)FDLK	3	2	1.1019	+	---	999	56	651	651	9891	14032	20191107_Haura_KRAS-G12C_TMT-Batch1-H358-pY_run2	19931	9891	14032	20191107_Haura_KRAS-G12C_TMT-Batch1-H358-pY_run2	19931	9891	14032	20191107_Haura_KRAS-G12C_TMT-Batch1-H358-pY_run2	19931	Phosphorylation (STY)	1	YEpYFDLK	3,n	651,n	0.5	0.5	YEYFDLK	YEpYFDLK;---;---;3;1;3,n	ph_REV__Q6P179:651
sp|Q16625|OCLN_HUMAN	sp|Q16625|OCLN_HUMAN	Q16625	__Other	Q16625	Q16625	sp|Q16625|OCLN_HUMAN Occludin OS=Homo sapiens OX=9606 GN=OCLN PE=1 SV=1	0.996083	24.1303	5.09244e-05	112.94	72.509	+	1	SNGKVNDKRFYPESSYKSTPVPEVVQELPLT	X;X;X;X;X;X;X;X;X;X;X;X;X;X;X;Phospho (STY);X;X;X;X;X;X;X;X;X;X;X;X;X;X;X	XXXXXXXXXPPPPPPPPXXXXXXXXXXXXXX	FYPESS(0.004)Y(0.996)K	FY(-75.39)PES(-41.62)S(-24.13)Y(24.13)K	7	3	3.6007	---	---	2006	677	342	342	2600	3508	20191107_Haura_KRAS-G12C_TMT-Batch1-H358-pY_run1	13447	2609	3518	20191112_Haura_KRAS-G12C_TMT-Batch2-Calu1-pY_run2	13481	2609	3518	20191112_Haura_KRAS-G12C_TMT-Batch2-Calu1-pY_run2	13481	Phosphorylation (STY)	1	FYPESSpYK	7>>n	342>>n	0.996	0.996	FYPESSYK	FYPESSpYK;Q16625;SNGKVNDKRFYPESSYKSTPVPEVVQELPLT;7;1;7>>n	ph_Q16625:342
sp|Q86X29|LSR_HUMAN	sp|Q86X29|LSR_HUMAN	Q86X29	__Other	Q86X29	Q86X29	sp|Q86X29|LSR_HUMAN Lipolysis-stimulated lipoprotein receptor OS=Homo sapiens OX=9606 GN=LSR PE=1 SV=4	0.994212	22.3496	0.00391562	80.377	56.821	---	1	RIQASQQDDSMRVLYYMEKELANFDPSRPGP	X;X;X;X;X;X;X;X;X;X;X;X;X;X;X;Phospho (STY);X;X;X;X;X;X;X;X;X;X;X;X;X;X;X	XXXXXXXXXXXXPPPPPPPXXXXXXXXXXXX	VLY(0.006)Y(0.994)MEK	VLY(-22.35)Y(22.35)MEK	4	2	1.9938	---	---	2151	777	407	407	9350	13294	20191107_Haura_KRAS-G12C_TMT-Batch1-H358-pY_run1	16269	9348	13292	20191107_Haura_KRAS-G12C_TMT-Batch1-H358-pY_run2	13704	9348	13292	20191107_Haura_KRAS-G12C_TMT-Batch1-H358-pY_run2	13704	Phosphorylation (STY)	1	VLYpYMEK	4>>n	407>>n	0.994	0.994	VLYYMEK	VLYpYMEK;Q86X29;RIQASQQDDSMRVLYYMEKELANFDPSRPGP;4;1;4>>n	ph_Q86X29:407
sp|O94929|ABLM3_HUMAN	sp|O94929|ABLM3_HUMAN	O94929	__Other	O94929	O94929	sp|O94929|ABLM3_HUMAN Actin-binding LIM protein 3 OS=Homo sapiens OX=9606 GN=ABLIM3 PE=1 SV=3	0.999036	31.0523	4.4481e-18	205.59	166.44	+	1	GRLILKEEMKARSSSYADPWTPPRSSTSSRE	X;X;X;X;X;X;X;X;X;X;X;X;X;X;X;Phospho (STY);X;X;X;X;X;X;X;X;X;X;X;X;X;X;X	XXXXXXXXXXXXPPPPPPPPPPPPXXXXXXX	SSS(0.001)Y(0.999)ADPWTPPR	S(-40.45)S(-40.45)S(-31.05)Y(31.05)ADPWT(-104.97)PPR	4	3	-2.9535	---	---	1207	219	538	538	7851	11095	20191112_Haura_KRAS-G12C_TMT-Batch2-Calu1-pY_run1	12837	7850	11094	20191112_Haura_KRAS-G12C_TMT-Batch2-Calu1-pY_run1	12891	7850	11094	20191112_Haura_KRAS-G12C_TMT-Batch2-Calu1-pY_run1	12891	Phosphorylation (STY)	1	SSSpYADPWTPPR	4>>n	538>>n	0.999	0.999	SSSYADPWTPPR	SSSpYADPWTPPR;O94929;GRLILKEEMKARSSSYADPWTPPRSSTSSRE;4;1;4>>n	ph_O94929:538
sp|Q06418|TYRO3_HUMAN;sp|Q12866|MERTK_HUMAN	sp|Q06418|TYRO3_HUMAN;sp|Q12866|MERTK_HUMAN	Q06418;Q12866	__Other	Q06418;Q12866	Q12866	sp|Q06418|TYRO3_HUMAN Tyrosine-protein kinase receptor TYRO3 OS=Homo sapiens OX=9606 GN=TYRO3 PE=1 SV=1;sp|Q12866|MERTK_HUMAN Tyrosine-protein kinase Mer OS=Homo sapiens OX=9606 GN=MERTK PE=1 SV=2	0.999934	41.9406	2.23198e-07	192.11	112.65	+	1	CVADFGLSKKIYSGDYYRQGRIAKMPVKWIA;CVADFGLSRKIYSGDYYRQGCASKLPVKWLA	X;X;X;X;X;X;X;X;X;X;X;X;X;X;X;Phospho (STY);X;X;X;X;X;X;X;X;X;X;X;X;X;X;X	XXXXXXXXXPPPPPPPPPXXXXXXXXXXXXX	IYSGDY(1)YR	IY(-87.66)S(-56.24)GDY(41.94)Y(-41.94)R	6	2	-0.30853	---	---	1813	571;596	685;753	753	4205	6126	20191107_Haura_KRAS-G12C_TMT-Batch1-H358-pY_run2	11941	4205	6126	20191107_Haura_KRAS-G12C_TMT-Batch1-H358-pY_run2	11941	4205	6126	20191107_Haura_KRAS-G12C_TMT-Batch1-H358-pY_run2	11941	Phosphorylation (STY)	1	IYSGDpYYR	6>>n	685>>n;753>>n	1	1	IYSGDYYR	IYSGDpYYR;Q06418;Q12866;CVADFGLSKKIYSGDYYRQGRIAKMPVKWIA;CVADFGLSRKIYSGDYYRQGCASKLPVKWLA;6;1;6>>n	ph_Q06418;Q12866:685;753
sp|Q8TEW8|PAR3L_HUMAN	sp|Q8TEW8|PAR3L_HUMAN	Q8TEW8	__Other	Q8TEW8	Q8TEW8	sp|Q8TEW8|PAR3L_HUMAN Partitioning defective 3 homolog B OS=Homo sapiens OX=9606 GN=PARD3B PE=1 SV=2	0.999668	34.7841	0.0042958	63.76	51.184	+	1	QDVPPSPPQHQRMPAYQETGRPGPRGGSPDQ	X;X;X;X;X;X;X;X;X;X;X;X;X;X;X;Phospho (STY);X;X;X;X;X;X;X;X;X;X;X;X;X;X;X	XXXXXXXXXXXXPPPPPPPPPPPPPXXXXXX	MPAY(1)QETGRPGPR	MPAY(34.78)QET(-34.78)GRPGPR	4	3	-1.9772	---	---	2269	851	1172	1172	5582	8010	20191112_Haura_KRAS-G12C_TMT-Batch2-Calu1-pY_run2	8522	5582	8010	20191112_Haura_KRAS-G12C_TMT-Batch2-Calu1-pY_run2	8522	5582	8010	20191112_Haura_KRAS-G12C_TMT-Batch2-Calu1-pY_run2	8522	Phosphorylation (STY)	1	MPApYQETGRPGPR	4>>n	1172>>n	1	1	MPAYQETGRPGPR	MPApYQETGRPGPR;Q8TEW8;QDVPPSPPQHQRMPAYQETGRPGPRGGSPDQ;4;1;4>>n	ph_Q8TEW8:1172
sp|O43491|E41L2_HUMAN	sp|O43491|E41L2_HUMAN	O43491	__Other	O43491	O43491	sp|O43491|E41L2_HUMAN Band 4.1-like protein 2 OS=Homo sapiens OX=9606 GN=EPB41L2 PE=1 SV=1	0.961929	16.2089	0.00176725	91.318	26.28	+	1	GISRFIPPWLKKQKSYTLVVAKDGGDKKEPT	X;X;X;X;X;X;X;X;X;X;X;X;X;X;X;Phospho (STY);X;X;X;X;X;X;X;X;X;X;X;X;X;X;X	XXXXXXXXXXXXXXPPPPPPPPXXXXXXXXX	S(0.015)Y(0.962)T(0.023)LVVAK	S(-18.06)Y(16.21)T(-16.21)LVVAK	2	2	3.8243	---	---	1116	164	88	88	8159	11524	20191112_Haura_KRAS-G12C_TMT-Batch2-Calu1-pY_run2	13666	8159	11524	20191112_Haura_KRAS-G12C_TMT-Batch2-Calu1-pY_run2	13666	8159	11524	20191112_Haura_KRAS-G12C_TMT-Batch2-Calu1-pY_run2	13666	Phosphorylation (STY)	1	SpYTLVVAK	2>>n	88>>n	0.962	0.962	SYTLVVAK	SpYTLVVAK;O43491;GISRFIPPWLKKQKSYTLVVAKDGGDKKEPT;2;1;2>>n	ph_O43491:88
sp|Q8N4C8|MINK1_HUMAN	sp|Q8N4C8|MINK1_HUMAN	Q8N4C8	__Other	Q8N4C8	Q8N4C8	sp|Q8N4C8|MINK1_HUMAN Misshapen-like kinase 1 OS=Homo sapiens OX=9606 GN=MINK1 PE=1 SV=2	0.996803	25.5679	2.64941e-100	267.51	254.57	+	1	TPEEERNLLHADSNGYTNLPDVVQPSHSPTE	X;X;X;X;X;X;X;X;X;X;X;X;X;X;X;Phospho (STY);X;X;X;X;X;X;X;X;X;X;X;X;X;X;X	XXXXXXPPPPPPPPPPPPPPPPPPPPPPPPP	NLLHADSNGY(0.997)T(0.003)NLPDVVQPSHSPTENSK	NLLHADS(-33.64)NGY(25.57)T(-25.57)NLPDVVQPS(-178.77)HS(-185.17)PT(-205.93)ENS(-203.73)K	10	4	1.3103	---	---	2204	814	906	906	5833	8369	20191112_Haura_KRAS-G12C_TMT-Batch2-Calu1-pY_run2	13204	5833	8369	20191112_Haura_KRAS-G12C_TMT-Batch2-Calu1-pY_run2	13204	5833	8369	20191112_Haura_KRAS-G12C_TMT-Batch2-Calu1-pY_run2	13204	Phosphorylation (STY)	1	NLLHADSNGpYTNLPDVVQPSHSPTENSK	10>>n	906>>n	0.997	0.997	NLLHADSNGYTNLPDVVQPSHSPTENSK	NLLHADSNGpYTNLPDVVQPSHSPTENSK;Q8N4C8;TPEEERNLLHADSNGYTNLPDVVQPSHSPTE;10;1;10>>n	ph_Q8N4C8:906
sp|P63261|ACTG_HUMAN	sp|P63261|ACTG_HUMAN	P60709;P63261	__Other	P63261	P63261	sp|P63261|ACTG_HUMAN Actin, cytoplasmic 2 OS=Homo sapiens OX=9606 GN=ACTG1 PE=1 SV=1;sp|P60709|ACTB_HUMAN Actin, cytoplasmic 1 OS=Homo sapiens OX=9606 GN=ACTB PE=1 SV=1	0.690967	3.49527	1.73954e-07	93.006	77.752	---	1	IMKCDVDIRKDLYANTVLSGGTTMYPGIADR	X;X;X;X;X;X;X;X;X;X;X;X;X;X;X;Phospho (STY);X;X;X;X;X;X;X;X;X;X;X;X;X;X;X	XXXXXXXXXPPPPPPPPPPPPPPPPPPPPPP	KDLY(0.309)ANT(0.691)VLSGGTTMYPGIADR	KDLY(-3.5)ANT(3.5)VLS(-41.48)GGT(-52.62)T(-59.33)MY(-71.88)PGIADR	7	3	1.0281	---	---	747	502	297	297	4287	6218	20191113_Haura_KRAS-G12C_TMT-Batch3-H1792-pY_run1	15478	4287	6218	20191113_Haura_KRAS-G12C_TMT-Batch3-H1792-pY_run1	15478	4287	6218	20191113_Haura_KRAS-G12C_TMT-Batch3-H1792-pY_run1	15478	Phosphorylation (STY)	1	KDLYANpTVLSGGTTMYPGIADR	7>>n	297>>n	0.691	0.691	KDLYANTVLSGGTTMYPGIADR	KDLYANpTVLSGGTTMYPGIADR;P60709;P63261;IMKCDVDIRKDLYANTVLSGGTTMYPGIADR;7;1;7>>n	ph_P63261:297
sp|Q96QZ7|MAGI1_HUMAN	sp|Q96QZ7|MAGI1_HUMAN	Q96QZ7	__Other	Q96QZ7	Q96QZ7	sp|Q96QZ7|MAGI1_HUMAN Membrane-associated guanylate kinase, WW and PDZ domain-containing protein 1 OS=Homo sapiens OX=9606 GN=MAGI1 PE=1 SV=3	1	73.3937	1.74954e-09	159.13	131.28	+	1	ELELPAGWEKIEDPVYGIYYVDHINRKTQYE	X;X;X;X;X;X;X;X;X;X;X;X;X;X;X;Phospho (STY);X;X;X;X;X;X;X;X;X;X;X;X;X;X;X	XXXXXXXXXXPPPPPPPPPPPPPPPPPXXXX	IEDPVY(1)GIYYVDHINRK	IEDPVY(73.39)GIY(-73.39)Y(-90.18)VDHINRK	6	4	-0.13491	---	---	2394	931	373	373	3869	5405	20191113_Haura_KRAS-G12C_TMT-Batch3-H1792-pY_run2	15820	3869	5405	20191113_Haura_KRAS-G12C_TMT-Batch3-H1792-pY_run2	15820	3869	5405	20191113_Haura_KRAS-G12C_TMT-Batch3-H1792-pY_run2	15820	Phosphorylation (STY)	1	IEDPVpYGIYYVDHINRK	6>>n	373>>n	1	1	IEDPVYGIYYVDHINRK	IEDPVpYGIYYVDHINRK;Q96QZ7;ELELPAGWEKIEDPVYGIYYVDHINRKTQYE;6;1;6>>n	ph_Q96QZ7:373
sp|Q5R3F8|PPR29_HUMAN	sp|Q5R3F8|PPR29_HUMAN	Q5R3F8	__Other	Q5R3F8	Q5R3F8	sp|Q5R3F8|PPR29_HUMAN Protein phosphatase 1 regulatory subunit 29 OS=Homo sapiens OX=9606 GN=ELFN2 PE=1 SV=1	0.985376	20.1205	7.94459e-07	170.47	83.149	+	1	VSFLKPLTRSKRDSTYSQLSPRHYYSGYSSS	X;X;X;X;X;X;X;X;X;X;X;X;X;X;X;Phospho (STY);X;X;X;X;X;X;X;X;X;X;X;X;X;X;X	XXXXXXXXXXXXPPPPPPPPPPXXXXXXXXX	DST(0.01)Y(0.985)S(0.005)QLSPR	DS(-33.9)T(-20.12)Y(20.12)S(-23.27)QLS(-100.52)PR	4	2	-0.93417	---	---	2031	697	743	743	1578	2156	20191112_Haura_KRAS-G12C_TMT-Batch2-Calu1-pY_run2	9299	1578	2156	20191112_Haura_KRAS-G12C_TMT-Batch2-Calu1-pY_run2	9299	1578	2156	20191112_Haura_KRAS-G12C_TMT-Batch2-Calu1-pY_run2	9299	Phosphorylation (STY)	1	DSTpYSQLSPR	4>>n	743>>n	0.985	0.985	DSTYSQLSPR	DSTpYSQLSPR;Q5R3F8;VSFLKPLTRSKRDSTYSQLSPRHYYSGYSSS;4;1;4>>n	ph_Q5R3F8:743
sp|Q9H2X6|HIPK2_HUMAN	sp|Q9H2X6|HIPK2_HUMAN	Q86Z02;Q9H2X6	__Other	Q9H2X6	Q9H2X6	sp|Q9H2X6|HIPK2_HUMAN Homeodomain-interacting protein kinase 2 OS=Homo sapiens OX=9606 GN=HIPK2 PE=1 SV=2;sp|Q86Z02|HIPK1_HUMAN Homeodomain-interacting protein kinase 1 OS=Homo sapiens OX=9606 GN=HIPK1 PE=1 SV=1	0.63708	3.44666	0.00259935	88.134	58.758	---	2	IDFGSASHVSKAVCSTYLQSRYYRAPEIILG	X;X;X;X;X;X;X;X;X;X;X;X;X;X;X;Phospho (STY);Phospho (STY);X;X;X;X;X;X;X;X;X;X;X;X;X;X	XXXXXXXXXXXPPPPPPPPPPXXXXXXXXXX	AVCS(0.093)T(0.637)Y(0.984)LQS(0.285)R	AVCS(-8.93)T(3.45)Y(17.1)LQS(-3.45)R	5	2	1.3586	---	---	838	782	360	360	861	1221	20191113_Haura_KRAS-G12C_TMT-Batch3-H1792-pY_run1	11328	861	1221	20191113_Haura_KRAS-G12C_TMT-Batch3-H1792-pY_run1	11328	861	1221	20191113_Haura_KRAS-G12C_TMT-Batch3-H1792-pY_run1	11328	Phosphorylation (STY)	2	AVCSpTpYLQSR	6>>5>>n	361>>360>>n	0.637	0.627	AVCSTYLQSR	AVCSpTpYLQSR;Q86Z02;Q9H2X6;IDFGSASHVSKAVCSTYLQSRYYRAPEIILG;5;2;6>>5>>n	ph_Q9H2X6:360
sp|Q6ZS17|RIPR1_HUMAN	sp|Q6ZS17|RIPR1_HUMAN	Q6ZS17	__Other	Q6ZS17	Q6ZS17	sp|Q6ZS17|RIPR1_HUMAN Rho family-interacting cell polarization regulator 1 OS=Homo sapiens OX=9606 GN=RIPOR1 PE=1 SV=1	0.544494	1.55095	0.000588305	105.46	78.346	---	1	SVNKASTVTKRFSTYSQSPPDTPSLREQAFY	X;X;X;X;X;X;X;X;X;X;X;X;X;X;X;Phospho (STY);X;X;X;X;X;X;X;X;X;X;X;X;X;X;Phospho (STY)	XXXXXXXXXXXPPPPPPPPPPPPPPPXXXXX	FS(0.008)T(0.065)Y(0.381)S(0.544)QS(0.001)PPDTPSLR	FS(-18.28)T(-9.23)Y(-1.55)S(1.55)QS(-25.8)PPDT(-64.73)PS(-78.03)LR	5	2	-1.0636	---	---	356	741	349	349	2575	3480	20191112_Haura_KRAS-G12C_TMT-Batch2-Calu1-pY_run1	13534	2575	3480	20191112_Haura_KRAS-G12C_TMT-Batch2-Calu1-pY_run1	13534	2575	3480	20191112_Haura_KRAS-G12C_TMT-Batch2-Calu1-pY_run1	13534	Phosphorylation (STY)	1	FSTYpSQSPPDTPSLR	5>n	349>n	0.544	0.544	FSTYSQSPPDTPSLR	FSTYpSQSPPDTPSLR;Q6ZS17;SVNKASTVTKRFSTYSQSPPDTPSLREQAFY;5;1;5>n	ph_Q6ZS17:349
sp|O75369|FLNB_HUMAN	sp|O75369|FLNB_HUMAN	O75369	__Other	O75369	O75369	sp|O75369|FLNB_HUMAN Filamin-B OS=Homo sapiens OX=9606 GN=FLNB PE=1 SV=2	1	75.8543	0.00793258	75.854	31.407	+	1	IHPATGGYNPDLVRAYGPGLEKSGCIVNNLA	X;X;X;X;X;X;X;X;X;X;X;X;X;X;X;Phospho (STY);X;X;X;X;X;X;X;X;X;X;X;X;X;X;X	XXXXXXXXXXXXXXPPPPPPPPXXXXXXXXX	AY(1)GPGLEK	AY(75.85)GPGLEK	2	2	2.1441	---	---	1177	199	651	651	945	1324	20191113_Haura_KRAS-G12C_TMT-Batch3-H1792-pY_run2	11465	945	1324	20191113_Haura_KRAS-G12C_TMT-Batch3-H1792-pY_run2	11465	945	1324	20191113_Haura_KRAS-G12C_TMT-Batch3-H1792-pY_run2	11465	Phosphorylation (STY)	1	ApYGPGLEK	2,x	651,x	1	1	AYGPGLEK	ApYGPGLEK;O75369;IHPATGGYNPDLVRAYGPGLEKSGCIVNNLA;2;1;2,x	ph_O75369:651
sp|Q9H560|ANR19_HUMAN	sp|Q9H560|ANR19_HUMAN	Q9H560	__Other	Q9H560	Q9H560	sp|Q9H560|ANR19_HUMAN Putative ankyrin repeat domain-containing protein 19 OS=Homo sapiens OX=9606 GN=ANKRD19P PE=5 SV=1	0.992975	21.5029	0.0187172	44.457	18.739	---	1	DLDARDRKDRTVLHLTCAHGRVEVVTLLLSR	X;X;X;X;X;X;X;X;X;X;X;X;X;X;X;Phospho (STY);X;X;X;X;X;X;X;X;X;X;X;X;X;X;X	XXXXXXXPPPPPPPPPPPPPPXXXXXXXXXX	KDRT(0.007)VLHLT(0.993)CAHGR	KDRT(-21.5)VLHLT(21.5)CAHGR	9	4	-2.9476	---	---	913	996	75	75	4295	6227	20191112_Haura_KRAS-G12C_TMT-Batch2-Calu1-pY_run2	11942	4294	6226	20191112_Haura_KRAS-G12C_TMT-Batch2-Calu1-pY_run2	11686	4294	6226	20191112_Haura_KRAS-G12C_TMT-Batch2-Calu1-pY_run2	11686	Phosphorylation (STY)	1	KDRTVLHLpTCAHGR	9>>n	75>>n	0.993	0.993	KDRTVLHLTCAHGR	KDRTVLHLpTCAHGR;Q9H560;DLDARDRKDRTVLHLTCAHGRVEVVTLLLSR;9;1;9>>n	ph_Q9H560:75
sp|P08670|VIME_HUMAN	sp|P08670|VIME_HUMAN	P08670	__Other	P08670	P08670	sp|P08670|VIME_HUMAN Vimentin OS=Homo sapiens OX=9606 GN=VIM PE=1 SV=4	1	76.6789	0.000696762	93.649	56.537	+	1	NEKVELQELNDRFANYIDKVRFLEQQNKILL	X;X;X;X;X;X;X;X;X;X;X;X;X;X;X;Phospho (STY);X;X;X;X;X;X;X;X;X;X;X;X;X;X;X	XXXXXXXXXXXXPPPPPPPPPXXXXXXXXXX	FANY(1)IDKVR	FANY(76.68)IDKVR	4	3	1.6312	---	---	1339	285	117	117	2359	3196	20191113_Haura_KRAS-G12C_TMT-Batch3-H1792-pY_run2	13701	2358	3195	20191113_Haura_KRAS-G12C_TMT-Batch3-H1792-pY_run1	13610	2358	3195	20191113_Haura_KRAS-G12C_TMT-Batch3-H1792-pY_run1	13610	Phosphorylation (STY)	1	FANpYIDKVR	4,x	117,x	1	1	FANYIDKVR	FANpYIDKVR;P08670;NEKVELQELNDRFANYIDKVRFLEQQNKILL;4;1;4,x	ph_P08670:117
sp|P78310|CXAR_HUMAN	sp|P78310|CXAR_HUMAN	P78310	__Other	P78310	P78310	sp|P78310|CXAR_HUMAN Coxsackievirus and adenovirus receptor OS=Homo sapiens OX=9606 GN=CXADR PE=1 SV=1	0.992158	21.0215	1.07457e-12	188.29	150.94	+	1	GSMSPSNMEGYSKTQYNQVPSEDFERTPQSP	X;X;X;X;X;X;X;X;X;X;X;X;X;X;X;Phospho (STY);X;X;X;X;X;X;X;X;X;X;X;X;X;X;X	XXXXXXXXXXXXXPPPPPPPPPPPPPXXXXX	T(0.008)QY(0.992)NQVPSEDFER	T(-21.02)QY(21.02)NQVPS(-80.97)EDFER	3	3	-0.10639	---	---	1739	531	318	318	8619	12119	20191107_Haura_KRAS-G12C_TMT-Batch1-H358-pY_run1	11636	8624	12124	20191112_Haura_KRAS-G12C_TMT-Batch2-Calu1-pY_run2	11623	8624	12124	20191112_Haura_KRAS-G12C_TMT-Batch2-Calu1-pY_run2	11623	Phosphorylation (STY)	1	TQpYNQVPSEDFER	3>>n	318>>n	0.992	0.992	TQYNQVPSEDFER	TQpYNQVPSEDFER;P78310;GSMSPSNMEGYSKTQYNQVPSEDFERTPQSP;3;1;3>>n	ph_P78310:318
sp|P43121|MUC18_HUMAN	sp|P43121|MUC18_HUMAN	P43121	__Other	P43121	P43121	sp|P43121|MUC18_HUMAN Cell surface glycoprotein MUC18 OS=Homo sapiens OX=9606 GN=MCAM PE=1 SV=2	1	103.213	1.01373e-06	161.76	132.95	+	1	GSSGDKRAPGDQGEKYIDLRH__________	X;X;X;X;X;X;X;X;X;X;X;X;X;X;X;Phospho (STY);X;X;X;X;X;X;X;X;X;X;X;X;X;X;X	XXXXXXXPPPPPPPPPPPPPPXXXXXXXXXX	APGDQGEKY(1)IDLRH	APGDQGEKY(103.21)IDLRH	9	4	-1.397	---	---	1594	440	641	641	562	799	20191113_Haura_KRAS-G12C_TMT-Batch3-H1792-pY_run2	10100	558	793	20191112_Haura_KRAS-G12C_TMT-Batch2-Calu1-pY_run1	9979	558	793	20191112_Haura_KRAS-G12C_TMT-Batch2-Calu1-pY_run1	9979	Phosphorylation (STY)	1	APGDQGEKpYIDLRH	9,x	641,x	1	1	APGDQGEKYIDLRH	APGDQGEKpYIDLRH;P43121;GSSGDKRAPGDQGEKYIDLRH__________;9;1;9,x	ph_P43121:641
sp|Q9NWU5|RM22_HUMAN	sp|Q9NWU5|RM22_HUMAN	Q9NWU5	__Other	Q9NWU5	Q9NWU5	sp|Q9NWU5|RM22_HUMAN 39S ribosomal protein L22, mitochondrial OS=Homo sapiens OX=9606 GN=MRPL22 PE=1 SV=1	0.983235	17.6826	0.0314192	46.426	30.201	+	1	IRYHGRGRFGIMEKVYCHYFVKLVEGPPPPP	X;X;X;X;X;X;X;X;X;X;X;X;X;X;X;Phospho (STY);X;X;X;X;X;X;X;X;X;X;X;X;X;X;X	XXXXXXXXXXXXXXPPPPPPPPXXXXXXXXX	VY(0.983)CHY(0.017)FVK	VY(17.68)CHY(-17.68)FVK	2	3	2.0841	---	---	2610	1042	165	165	9576	13603	20191113_Haura_KRAS-G12C_TMT-Batch3-H1792-pY_run1	12444	9576	13603	20191113_Haura_KRAS-G12C_TMT-Batch3-H1792-pY_run1	12444	9576	13603	20191113_Haura_KRAS-G12C_TMT-Batch3-H1792-pY_run1	12444	Phosphorylation (STY)	1	VpYCHYFVK	2>>n	165>>n	0.983	0.983	VYCHYFVK	VpYCHYFVK;Q9NWU5;IRYHGRGRFGIMEKVYCHYFVKLVEGPPPPP;2;1;2>>n	ph_Q9NWU5:165
sp|Q99959|PKP2_HUMAN	sp|Q99959|PKP2_HUMAN	Q99959	__Other	Q99959	Q99959	sp|Q99959|PKP2_HUMAN Plakophilin-2 OS=Homo sapiens OX=9606 GN=PKP2 PE=1 SV=2	0.999982	47.3424	4.20978e-56	267.53	217.94	+	1	VPKTYDMLKAGTTATYEGRWGRGTAQYSSQK	X;X;X;X;X;X;X;X;X;X;X;X;X;X;X;Phospho (STY);X;X;X;X;X;X;X;X;X;X;Phospho (STY);X;X;X;X	XXXXXXXXXPPPPPPPPPPPPPXXXXXXXXX	AGTTATY(1)EGRWGR	AGT(-118.78)T(-103.95)AT(-47.34)Y(47.34)EGRWGR	7	3	-3.2212	---	---	2457	950	119	119	312	481	20191112_Haura_KRAS-G12C_TMT-Batch2-Calu1-pY_run2	8935	305	466	20191107_Haura_KRAS-G12C_TMT-Batch1-H358-pY_run2	6715	305	466	20191107_Haura_KRAS-G12C_TMT-Batch1-H358-pY_run2	6715	Phosphorylation (STY)	1	AGTTATpYEGRWGR	7>>n	119>>n	1	1	AGTTATYEGRWGR	AGTTATpYEGRWGR;Q99959;VPKTYDMLKAGTTATYEGRWGRGTAQYSSQK;7;1;7>>n	ph_Q99959:119
sp|Q99704|DOK1_HUMAN	sp|Q99704|DOK1_HUMAN	Q99704	__Other	Q99704	Q99704	sp|Q99704|DOK1_HUMAN Docking protein 1 OS=Homo sapiens OX=9606 GN=DOK1 PE=1 SV=1	1	136.384	3.60121e-36	150.23	137.82	---	1;2	YDEPEGLAPVPPQGLYDLPREPKDAWWCQAR	Phospho (STY);X;X;X;X;X;X;X;X;X;X;X;X;X;X;Phospho (STY);X;X;X;X;X;X;X;X;X;X;X;X;X;X;X	PPPPPPPPPPPPPPPPPPPPPPPXXXXXXXX	LTDPKEDPIY(1)DEPEGLAPVPPQGLY(1)DLPREPK	LT(-55.5)DPKEDPIY(55.5)DEPEGLAPVPPQGLY(136.38)DLPREPK	25	4	0.87762	---	---	2443	943	377	377	5317	7701	20191112_Haura_KRAS-G12C_TMT-Batch2-Calu1-pY_run2	17774	5317	7701	20191112_Haura_KRAS-G12C_TMT-Batch2-Calu1-pY_run2	17774	5317	7701	20191112_Haura_KRAS-G12C_TMT-Batch2-Calu1-pY_run2	17774	Phosphorylation (STY)	2	LTDPKEDPIpYDEPEGLAPVPPQGLpYDLPREPK	25,10>>n	377,362>>n	1	1	LTDPKEDPIYDEPEGLAPVPPQGLYDLPREPK	LTDPKEDPIpYDEPEGLAPVPPQGLpYDLPREPK;Q99704;YDEPEGLAPVPPQGLYDLPREPKDAWWCQAR;25;2;25,10>>n	ph_Q99704:377
sp|Q9UQC2|GAB2_HUMAN	sp|Q9UQC2|GAB2_HUMAN	Q9UQC2	__Other	Q9UQC2	Q9UQC2	sp|Q9UQC2|GAB2_HUMAN GRB2-associated-binding protein 2 OS=Homo sapiens OX=9606 GN=GAB2 PE=1 SV=1	0.999039	30.2514	4.99169e-157	314.26	297.99	+	1	TKGSLTGSETDNEDVYTFKTPSNTLCREFGD	X;X;X;X;X;X;X;X;X;X;X;X;X;X;X;Phospho (STY);X;X;X;X;X;X;X;X;X;X;X;X;X;X;X	XXPPPPPPPPPPPPPPPPPPPPPPPPPXXXX	GSLTGSETDNEDVY(0.999)T(0.001)FKTPSNTLCR	GS(-234.56)LT(-223.95)GS(-211.45)ET(-182.11)DNEDVY(30.25)T(-30.25)FKT(-47.38)PS(-66.95)NT(-72.84)LCR	14	4	-0.50463	---	---	2709	1107	293	293	3190	4392	20191112_Haura_KRAS-G12C_TMT-Batch2-Calu1-pY_run1	13844	3192	4394	20191112_Haura_KRAS-G12C_TMT-Batch2-Calu1-pY_run2	13933	3192	4394	20191112_Haura_KRAS-G12C_TMT-Batch2-Calu1-pY_run2	13933	Phosphorylation (STY)	1	GSLTGSETDNEDVpYTFKTPSNTLCR	14>>n	293>>n	0.999	0.999	GSLTGSETDNEDVYTFKTPSNTLCR	GSLTGSETDNEDVpYTFKTPSNTLCR;Q9UQC2;TKGSLTGSETDNEDVYTFKTPSNTLCREFGD;14;1;14>>n	ph_Q9UQC2:293
sp|Q99959|PKP2_HUMAN	sp|Q99959|PKP2_HUMAN	Q99959	__Other	Q99959	Q99959	sp|Q99959|PKP2_HUMAN Plakophilin-2 OS=Homo sapiens OX=9606 GN=PKP2 PE=1 SV=2	0.999903	43.0901	0.000398755	110.74	80.161	---	2	EGRWGRGTAQYSSQKSVEERSLRHPLRRLEI	X;X;X;X;X;X;X;X;X;X;Phospho (STY);X;X;X;X;Phospho (STY);X;X;X;X;X;X;X;X;X;X;X;X;X;X;X	XXXXXXPPPPPPPPPPPPPPXXXXXXXXXXX	GTAQY(0.968)S(0.014)S(0.018)QKS(1)VEER	GT(-42.1)AQY(17.36)S(-18.26)S(-17.36)QKS(43.09)VEER	10	3	-1.5706	---	---	496	950	135	135	3274	4515	20191112_Haura_KRAS-G12C_TMT-Batch2-Calu1-pY_run1	8098	3274	4515	20191112_Haura_KRAS-G12C_TMT-Batch2-Calu1-pY_run1	8098	3274	4515	20191112_Haura_KRAS-G12C_TMT-Batch2-Calu1-pY_run1	8098	Phosphorylation (STY)	2	GTAQpYSSQKpSVEER	10,5>>n	135,130>>n	1	0.968	GTAQYSSQKSVEER	GTAQpYSSQKpSVEER;Q99959;EGRWGRGTAQYSSQKSVEERSLRHPLRRLEI;10;2;10,5>>n	ph_Q99959:135
sp|P06241|FYN_HUMAN;sp|P07947|YES_HUMAN	sp|P06241|FYN_HUMAN;sp|P07947|YES_HUMAN	P06241;P07947	__Other	P06241;P07947	P07947	sp|P06241|FYN_HUMAN Tyrosine-protein kinase Fyn OS=Homo sapiens OX=9606 GN=FYN PE=1 SV=3;sp|P07947|YES_HUMAN Tyrosine-protein kinase Yes OS=Homo sapiens OX=9606 GN=YES1 PE=1 SV=3	0.97602	16.2559	0.00058024	127.71	96.823	+	1	HVKHYKIRKLDNGGYYITTRAQFETLQQLVQ;NVKHYKIRKLDNGGYYITTRAQFDTLQKLVK	X;X;X;X;X;X;X;X;X;X;X;X;X;X;X;Phospho (STY);X;X;X;X;X;X;X;X;X;X;X;X;X;X;X	XXXXXXXXPPPPPPPPPPPPXXXXXXXXXXX	KLDNGGY(0.023)Y(0.976)IT(0.001)TR	KLDNGGY(-16.26)Y(16.26)IT(-31.19)T(-39)R	8	3	0.4277	---	---	1281	266;277	214;223	223	4450	6431	20191107_Haura_KRAS-G12C_TMT-Batch1-H358-pY_run2	11664	4451	6433	20191112_Haura_KRAS-G12C_TMT-Batch2-Calu1-pY_run1	11448	4450	6431	20191107_Haura_KRAS-G12C_TMT-Batch1-H358-pY_run2	11664	Phosphorylation (STY)	1	KLDNGGYpYITTR	8>>n	214>>n;223>>n	0.976	0.976	KLDNGGYYITTR	KLDNGGYpYITTR;P06241;P07947;HVKHYKIRKLDNGGYYITTRAQFETLQQLVQ;NVKHYKIRKLDNGGYYITTRAQFDTLQKLVK;8;1;8>>n	ph_P06241;P07947:214;223
sp|Q9NWQ8|PHAG1_HUMAN	sp|Q9NWQ8|PHAG1_HUMAN	Q9NWQ8	__Other	Q9NWQ8	Q9NWQ8	sp|Q9NWQ8|PHAG1_HUMAN Phosphoprotein associated with glycosphingolipid-enriched microdomains 1 OS=Homo sapiens OX=9606 GN=PAG1 PE=1 SV=2	0.998961	29.831	8.58461e-11	116.29	102.97	+	1	LKDSSSQENMVEDCLYETVKEIKEVAAAAHL	X;X;X;X;X;X;X;X;X;Oxidation (M);X;X;X;X;X;Phospho (STY);X;X;X;X;X;X;X;X;X;X;X;X;X;X;X	XXPPPPPPPPPPPPPPPPPPPPPXXXXXXXX	DSSSQENMVEDCLY(0.999)ET(0.001)VK	DS(-76.73)S(-76.97)S(-77.21)QENMVEDCLY(29.83)ET(-29.83)VK	14	3	-0.096658	---	---	2605	1041	181	181	1559	2136	20191107_Haura_KRAS-G12C_TMT-Batch1-H358-pY_run2	16336	1558	2135	20191107_Haura_KRAS-G12C_TMT-Batch1-H358-pY_run1	16332	1558	2135	20191107_Haura_KRAS-G12C_TMT-Batch1-H358-pY_run1	16332	Phosphorylation (STY)	1	DSSSQENMVEDCLpYETVK	14>>n	181>>n	0.999	0.999	DSSSQENMVEDCLYETVK	DSSSQENMVEDCLpYETVK;Q9NWQ8;LKDSSSQENMVEDCLYETVKEIKEVAAAAHL;14;1;14>>n	ph_Q9NWQ8:181
sp|Q00610|CLH1_HUMAN	sp|Q00610|CLH1_HUMAN	Q00610	__Other	Q00610	Q00610	sp|Q00610|CLH1_HUMAN Clathrin heavy chain 1 OS=Homo sapiens OX=9606 GN=CLTC PE=1 SV=5	0.926993	11.0371	0.042857	44.395	17.274	+	1	LMVLSPRLDHTRAVNYFSKVKQLPLVKPYLR	X;X;X;X;X;X;X;X;X;X;X;X;X;X;X;Phospho (STY);X;X;X;X;X;X;X;X;X;X;X;X;X;X;X	XXXXXXXXXXXXPPPPPPPXXXXXXXXXXXX	AVNY(0.927)FS(0.073)K	AVNY(11.04)FS(-11.04)K	4	2	2.6382	---	---	1762	551	1438	1438	891	1269	20191113_Haura_KRAS-G12C_TMT-Batch3-H1792-pY_run2	12789	891	1269	20191113_Haura_KRAS-G12C_TMT-Batch3-H1792-pY_run2	12789	891	1269	20191113_Haura_KRAS-G12C_TMT-Batch3-H1792-pY_run2	12789	Phosphorylation (STY)	1	AVNpYFSK	4>>n	1438>>n	0.927	0.927	AVNYFSK	AVNpYFSK;Q00610;LMVLSPRLDHTRAVNYFSKVKQLPLVKPYLR;4;1;4>>n	ph_Q00610:1438
sp|P68366|TBA4A_HUMAN	sp|P68366|TBA4A_HUMAN	P0DPH7;P0DPH8;P68363;P68366;Q6PEY2;Q71U36;Q9BQE3	__Other	P68366	P68366	sp|P68366|TBA4A_HUMAN Tubulin alpha-4A chain OS=Homo sapiens OX=9606 GN=TUBA4A PE=1 SV=1;sp|Q9BQE3|TBA1C_HUMAN Tubulin alpha-1C chain OS=Homo sapiens OX=9606 GN=TUBA1C PE=1 SV=1;sp|P68363|TBA1B_HUMAN Tubulin alpha-1B chain OS=Homo sapiens OX=9606 GN=TUBA1B	0.999369	31.9997	2.27778e-11	172.1	143.15	+	1	TNLVPYPRIHFPLATYAPVISAEKAYHEQLS	X;X;X;X;X;X;X;X;X;X;X;X;X;X;X;Phospho (STY);X;X;X;X;X;X;X;X;X;X;X;X;X;X;X	XXXXXXXXPPPPPPPPPPPPPPPPXXXXXXX	IHFPLAT(0.001)Y(0.999)APVISAEK	IHFPLAT(-32)Y(32)APVIS(-114.3)AEK	8	3	2.0765	---	---	1733	528	272	272	4006	5832	20191112_Haura_KRAS-G12C_TMT-Batch2-Calu1-pY_run1	17252	4006	5832	20191112_Haura_KRAS-G12C_TMT-Batch2-Calu1-pY_run1	17252	4006	5832	20191112_Haura_KRAS-G12C_TMT-Batch2-Calu1-pY_run1	17252	Phosphorylation (STY)	1	IHFPLATpYAPVISAEK	8>>n	272>>n	0.999	0.999	IHFPLATYAPVISAEK	IHFPLATpYAPVISAEK;P0DPH7;P0DPH8;P68363;P68366;Q6PEY2;Q71U36;Q9BQE3;TNLVPYPRIHFPLATYAPVISAEKAYHEQLS;8;1;8>>n	ph_P68366:272
sp|P07948|LYN_HUMAN	sp|P07948|LYN_HUMAN	P07948	__Other	P07948	P07948	sp|P07948|LYN_HUMAN Tyrosine-protein kinase Lyn OS=Homo sapiens OX=9606 GN=LYN PE=1 SV=3	1	92.005	6.34722e-05	119.89	38.253	+	1	ANLMKTLQHDKLVRLYAVVTREEPIYIITEY	X;X;X;X;X;X;X;X;X;X;X;X;X;X;X;Phospho (STY);X;X;X;X;X;X;X;X;X;Phospho (STY);X;X;X;X;X	XXXXXXXXXXXXXXPPPPPPPXXXXXXXXXX	LY(1)AVVTR	LY(92.01)AVVT(-92.01)R	2	2	0.12519	---	---	1314	278	306	306	5405	7811	20191107_Haura_KRAS-G12C_TMT-Batch1-H358-pY_run1	13331	5405	7811	20191107_Haura_KRAS-G12C_TMT-Batch1-H358-pY_run1	13331	5406	7812	20191107_Haura_KRAS-G12C_TMT-Batch1-H358-pY_run2	13297	Phosphorylation (STY)	1	LpYAVVTR	2>>n	306>>n	1	1	LYAVVTR	LpYAVVTR;P07948;ANLMKTLQHDKLVRLYAVVTREEPIYIITEY;2;1;2>>n	ph_P07948:306
sp|Q07157|ZO1_HUMAN	sp|Q07157|ZO1_HUMAN	Q07157	__Other	Q07157	Q07157	sp|Q07157|ZO1_HUMAN Tight junction protein ZO-1 OS=Homo sapiens OX=9606 GN=TJP1 PE=1 SV=3	0.887024	8.94979	0.00129061	70.622	53.254	+	1	KPAESKQYFEQYSRSYEQVPPQGFTSRAGHF	X;X;X;X;X;X;X;Phospho (STY);X;X;X;Phospho (STY);X;X;X;Phospho (STY);X;X;X;X;X;X;X;X;X;X;X;X;X;X;X	XXXXXXXXXXXXXXPPPPPPPPPPPPPXXXX	S(0.113)Y(0.887)EQVPPQGFTSR	S(-8.95)Y(8.95)EQVPPQGFT(-53.99)S(-53.85)R	2	3	-1.4602	---	---	1829	574	1199	1199	8086	11426	20191112_Haura_KRAS-G12C_TMT-Batch2-Calu1-pY_run1	11877	8084	11416	20191107_Haura_KRAS-G12C_TMT-Batch1-H358-pY_run1	11634	8084	11416	20191107_Haura_KRAS-G12C_TMT-Batch1-H358-pY_run1	11634	Phosphorylation (STY)	1	SpYEQVPPQGFTSR	2>>n	1199>>n	0.887	0.887	SYEQVPPQGFTSR	SpYEQVPPQGFTSR;Q07157;KPAESKQYFEQYSRSYEQVPPQGFTSRAGHF;2;1;2>>n	ph_Q07157:1199
sp|Q14185|DOCK1_HUMAN	sp|Q14185|DOCK1_HUMAN	Q14185	__Other	Q14185	Q14185	sp|Q14185|DOCK1_HUMAN Dedicator of cytokinesis protein 1 OS=Homo sapiens OX=9606 GN=DOCK1 PE=1 SV=2	0.997806	26.5859	1.0448e-09	88.001	71.694	+	1	ADVPPPLPLKGSVADYGNLMENQDLLGSPTP	X;X;X;X;X;X;X;X;X;X;X;X;X;X;X;Phospho (STY);X;X;X;X;X;X;X;X;X;X;X;X;X;X;X	XXXXXXXXXXPPPPPPPPPPPPPPPPPPPPP	GS(0.002)VADY(0.998)GNLMENQDLLGSPTPPPPPPHQR	GS(-26.59)VADY(26.59)GNLMENQDLLGS(-55.29)PT(-61.1)PPPPPPHQR	6	4	-2.0948	---	---	1936	638	1811	1811	3248	4480	20191113_Haura_KRAS-G12C_TMT-Batch3-H1792-pY_run2	14982	3248	4480	20191113_Haura_KRAS-G12C_TMT-Batch3-H1792-pY_run2	14982	3248	4480	20191113_Haura_KRAS-G12C_TMT-Batch3-H1792-pY_run2	14982	Phosphorylation (STY)	1	GSVADpYGNLMENQDLLGSPTPPPPPPHQR	6>>n	1811>>n	0.998	0.998	GSVADYGNLMENQDLLGSPTPPPPPPHQR	GSVADpYGNLMENQDLLGSPTPPPPPPHQR;Q14185;ADVPPPLPLKGSVADYGNLMENQDLLGSPTP;6;1;6>>n	ph_Q14185:1811
sp|P12931|SRC_HUMAN	sp|P12931|SRC_HUMAN	P12931	__Other	P12931	P12931	sp|P12931|SRC_HUMAN Proto-oncogene tyrosine-protein kinase Src OS=Homo sapiens OX=9606 GN=SRC PE=1 SV=3	0.999461	32.6857	7.7132e-13	148.24	110.27	+	1	RGTFLVRESETTKGAYCLSVSDFDNAKGLNV	X;X;X;X;X;X;X;X;X;X;X;X;X;X;X;Phospho (STY);X;X;X;X;X;X;X;X;X;X;X;X;X;X;X	XXXXXXXPPPPPPPPPPPPPPPPPPPPXXXX	GAY(0.999)CLS(0.001)VSDFDNAK	GAY(32.69)CLS(-32.69)VS(-78.76)DFDNAK	3	3	1.3451	---	---	1383	313	187	187	2677	3603	20191113_Haura_KRAS-G12C_TMT-Batch3-H1792-pY_run1	15251	2165	2921	20191113_Haura_KRAS-G12C_TMT-Batch3-H1792-pY_run1	13822	2165	2921	20191113_Haura_KRAS-G12C_TMT-Batch3-H1792-pY_run1	13822	Phosphorylation (STY)	1	GApYCLSVSDFDNAK	3>>n	187>>n	0.999	0.999	GAYCLSVSDFDNAK	GApYCLSVSDFDNAK;P12931;RGTFLVRESETTKGAYCLSVSDFDNAKGLNV;3;1;3>>n	ph_P12931:187
sp|Q9Y4H2|IRS2_HUMAN	sp|Q9Y4H2|IRS2_HUMAN	Q9Y4H2	__Other	Q9Y4H2	Q9Y4H2	sp|Q9Y4H2|IRS2_HUMAN Insulin receptor substrate 2 OS=Homo sapiens OX=9606 GN=IRS2 PE=1 SV=2	0.999371	32.0295	3.83306e-11	119.46	100.63	+	1	PASSPKVAYHPYPEDYGDIEIGSHRSSSSNL	X;X;X;X;X;X;X;X;X;X;X;X;X;X;X;Phospho (STY);X;X;X;X;X;X;X;X;X;X;X;X;X;X;X	XXXXXXPPPPPPPPPPPPPPPPPPPXXXXXX	VAYHPY(0.001)PEDY(0.999)GDIEIGSHR	VAY(-56.52)HPY(-32.03)PEDY(32.03)GDIEIGS(-85.06)HR	10	4	-0.57516	---	---	2752	1127	632	632	8937	12585	20191112_Haura_KRAS-G12C_TMT-Batch2-Calu1-pY_run1	12167	8937	12585	20191112_Haura_KRAS-G12C_TMT-Batch2-Calu1-pY_run1	12167	8937	12585	20191112_Haura_KRAS-G12C_TMT-Batch2-Calu1-pY_run1	12167	Phosphorylation (STY)	1	VAYHPYPEDpYGDIEIGSHR	10>>n	632>>n	0.999	0.999	VAYHPYPEDYGDIEIGSHR	VAYHPYPEDpYGDIEIGSHR;Q9Y4H2;PASSPKVAYHPYPEDYGDIEIGSHRSSSSNL;10;1;10>>n	ph_Q9Y4H2:632
sp|P10586|PTPRF_HUMAN	sp|P10586|PTPRF_HUMAN	P10586	__Other	P10586	P10586	sp|P10586|PTPRF_HUMAN Receptor-type tyrosine-protein phosphatase F OS=Homo sapiens OX=9606 GN=PTPRF PE=1 SV=2	1	75.3795	0.000139248	133.55	72.575	+	1	EAATCGHTEVPARNLYAHIQKLGQVPPGESV	X;X;X;X;X;X;X;X;X;X;X;X;X;X;X;Phospho (STY);X;X;X;X;X;X;X;X;X;X;X;X;X;X;X	XXXXXXXXXXXXXPPPPPPPPXXXXXXXXXX	NLY(1)AHIQK	NLY(75.38)AHIQK	3	3	1.6726	---	---	1366	300	1621	1621	5873	8410	20191113_Haura_KRAS-G12C_TMT-Batch3-H1792-pY_run2	10710	5870	8407	20191112_Haura_KRAS-G12C_TMT-Batch2-Calu1-pY_run1	10616	5869	8406	20191107_Haura_KRAS-G12C_TMT-Batch1-H358-pY_run2	10827	Phosphorylation (STY)	1	NLpYAHIQK	3,x	1621,x	1	1	NLYAHIQK	NLpYAHIQK;P10586;EAATCGHTEVPARNLYAHIQKLGQVPPGESV;3;1;3,x	ph_P10586:1621
sp|Q99959|PKP2_HUMAN	sp|Q99959|PKP2_HUMAN	Q99959	__Other	Q99959	Q99959	sp|Q99959|PKP2_HUMAN Plakophilin-2 OS=Homo sapiens OX=9606 GN=PKP2 PE=1 SV=2	0.999836	39.1541	2.26427e-10	100.68	91.247	---	3	VEERSLRHPLRRLEISPDSSPERAHYTHSDY	X;X;X;X;X;X;X;X;X;X;X;X;X;X;X;Phospho (STY);X;X;Phospho (STY);Phospho (STY);X;X;X;X;X;Phospho (STY);Phospho (STY);X;X;X;Phospho (STY)	XXXXXXXXXXXPPPPPPPPPPPPPPPPPPPP	LEIS(1)PDS(0.193)S(0.806)PERAHY(0.553)T(0.235)HS(0.139)DY(0.07)QY(0.004)SQR	LEIS(39.15)PDS(-6.07)S(6.07)PERAHY(3.63)T(-3.63)HS(-5.95)DY(-9.02)QY(-21.84)S(-35.11)QR	4	4	-2.1503	---	---	497	950	151	151	4883	7002	20191112_Haura_KRAS-G12C_TMT-Batch2-Calu1-pY_run1	11590	4883	7002	20191112_Haura_KRAS-G12C_TMT-Batch2-Calu1-pY_run1	11590	4883	7002	20191112_Haura_KRAS-G12C_TMT-Batch2-Calu1-pY_run1	11590	Phosphorylation (STY)	3	LEIpSPDSpSPERAHpYTHSDYQYSQR	4>8>14>n	151>155>161>n	1	0.446	LEISPDSSPERAHYTHSDYQYSQR	LEIpSPDSpSPERAHpYTHSDYQYSQR;Q99959;VEERSLRHPLRRLEISPDSSPERAHYTHSDY;4;3;4>8>14>n	ph_Q99959:151
sp|Q13480|GAB1_HUMAN	sp|Q13480|GAB1_HUMAN	Q13480	__Other	Q13480	Q13480	sp|Q13480|GAB1_HUMAN GRB2-associated-binding protein 1 OS=Homo sapiens OX=9606 GN=GAB1 PE=1 SV=2	0.999404	33.047	4.75722e-13	150.7	136.87	+	1;2	ETCSIPRTASDTDSSYCIPTAGMSPSRSNTI	X;X;X;X;X;X;X;X;X;X;X;X;X;X;X;Phospho (STY);X;X;X;X;X;X;Oxidation (M);Phospho (STY);X;X;X;X;X;X;X	XXXXXXXPPPPPPPPPPPPPPPPPPPPXXXX	TASDTDSSY(0.999)CIPTAGMSPSR	T(-49.94)AS(-50.77)DT(-44.35)DS(-43.46)S(-33.05)Y(33.05)CIPT(-88.11)AGMS(-118.75)PS(-126.69)R	9	3	-2.0278	---	---	1898	615	373	373	8245	11638	20191112_Haura_KRAS-G12C_TMT-Batch2-Calu1-pY_run2	12319	8245	11638	20191112_Haura_KRAS-G12C_TMT-Batch2-Calu1-pY_run2	12319	8245	11638	20191112_Haura_KRAS-G12C_TMT-Batch2-Calu1-pY_run2	12319	Phosphorylation (STY)	1	TASDTDSSpYCIPTAGMSPSR	9>>n	373>>n	0.999	0.999	TASDTDSSYCIPTAGMSPSR	TASDTDSSpYCIPTAGMSPSR;Q13480;ETCSIPRTASDTDSSYCIPTAGMSPSRSNTI;9;1;9>>n	ph_Q13480:373
sp|P29323|EPHB2_HUMAN	sp|P29323|EPHB2_HUMAN	P29323	__Other	P29323	P29323	sp|P29323|EPHB2_HUMAN Ephrin type-B receptor 2 OS=Homo sapiens OX=9606 GN=EPHB2 PE=1 SV=5	0.992189	20.7125	3.21696e-16	124	108.87	---	2	KVSDFGLSRFLEDDTSDPTYTSALGGKIPIR	X;X;X;X;X;X;X;X;X;X;X;X;X;X;X;Phospho (STY);X;X;X;Phospho (STY);X;X;X;X;X;X;X;X;X;X;X	XXXXXXXXXPPPPPPPPPPPPPPPPPPPPPP	FLEDDT(0.008)S(0.992)DPT(0.385)Y(0.556)T(0.051)S(0.008)ALGGKIPIR	FLEDDT(-20.71)S(20.71)DPT(-1.59)Y(1.59)T(-10.39)S(-18.26)ALGGKIPIR	7	4	0.26137	---	---	182	400	776	776	2476	3364	20191112_Haura_KRAS-G12C_TMT-Batch2-Calu1-pY_run2	18827	2476	3364	20191112_Haura_KRAS-G12C_TMT-Batch2-Calu1-pY_run2	18827	2476	3364	20191112_Haura_KRAS-G12C_TMT-Batch2-Calu1-pY_run2	18827	Phosphorylation (STY)	2	FLEDDTpSDPTpYTSALGGKIPIR	7>>11>n	776>>780>n	0.992	0.552	FLEDDTSDPTYTSALGGKIPIR	FLEDDTpSDPTpYTSALGGKIPIR;P29323;KVSDFGLSRFLEDDTSDPTYTSALGGKIPIR;7;2;7>>11>n	ph_P29323:776
sp|O43520|AT8B1_HUMAN	sp|O43520|AT8B1_HUMAN	O43520	__Other	O43520	O43520	sp|O43520|AT8B1_HUMAN Phospholipid-transporting ATPase IC OS=Homo sapiens OX=9606 GN=ATP8B1 PE=1 SV=3	0.999883	39.2997	1.03377e-08	151.8	129.48	+	1	KRSPLDAIVADGTAEYRRTGDS_________	X;X;X;X;X;X;X;X;X;X;X;X;X;X;X;Phospho (STY);X;X;X;X;X;X;X;X;X;X;X;X;X;X;X	XXPPPPPPPPPPPPPPPPXXXXXXXXXXXXX	SPLDAIVADGTAEY(1)RR	S(-145.07)PLDAIVADGT(-39.3)AEY(39.3)RR	14	3	-1.5216	---	---	1119	165	1245	1245	7633	10818	20191112_Haura_KRAS-G12C_TMT-Batch2-Calu1-pY_run1	14681	7633	10818	20191112_Haura_KRAS-G12C_TMT-Batch2-Calu1-pY_run1	14681	7633	10818	20191112_Haura_KRAS-G12C_TMT-Batch2-Calu1-pY_run1	14681	Phosphorylation (STY)	1	SPLDAIVADGTAEpYRR	14>>n	1245>>n	1	1	SPLDAIVADGTAEYRR	SPLDAIVADGTAEpYRR;O43520;KRSPLDAIVADGTAEYRRTGDS_________;14;1;14>>n	ph_O43520:1245
sp|P16144|ITB4_HUMAN	sp|P16144|ITB4_HUMAN	P16144	__Other	P16144	P16144	sp|P16144|ITB4_HUMAN Integrin beta-4 OS=Homo sapiens OX=9606 GN=ITGB4 PE=1 SV=5	0.988727	19.4232	3.65591e-13	151.01	127.56	---	2	HRMTTTSAAAYGTHLSPHVPHRVLSTSSTLT	X;X;X;X;X;X;X;X;X;X;Phospho (STY);X;X;X;X;Phospho (STY);X;X;X;X;X;X;X;X;X;X;X;X;X;X;X	XXPPPPPPPPPPPPPPPPPPPPXXXXXXXXX	MTTTSAAAY(0.998)GT(0.013)HLS(0.989)PHVPHR	MT(-90.39)T(-89.41)T(-81.58)S(-73.37)AAAY(27.81)GT(-19.42)HLS(19.42)PHVPHR	14	4	-2.3017	---	---	162	333	1474	1474	5675	8113	20191112_Haura_KRAS-G12C_TMT-Batch2-Calu1-pY_run2	10457	5675	8113	20191112_Haura_KRAS-G12C_TMT-Batch2-Calu1-pY_run2	10457	5675	8113	20191112_Haura_KRAS-G12C_TMT-Batch2-Calu1-pY_run2	10457	Phosphorylation (STY)	2	MTTTSAAApYGTHLpSPHVPHR	9,14>>n	1469,1474>>n	0.989	0.987	MTTTSAAAYGTHLSPHVPHR	MTTTSAAApYGTHLpSPHVPHR;P16144;HRMTTTSAAAYGTHLSPHVPHRVLSTSSTLT;14;2;9,14>>n	ph_P16144:1474
sp|P16144|ITB4_HUMAN	sp|P16144|ITB4_HUMAN	P16144	__Other	P16144	P16144	sp|P16144|ITB4_HUMAN Integrin beta-4 OS=Homo sapiens OX=9606 GN=ITGB4 PE=1 SV=5	0.998388	27.1536	3.65591e-13	151.01	127.56	+	2	STNSLHRMTTTSAAAYGTHLSPHVPHRVLST	X;X;X;X;X;X;X;X;X;X;X;X;X;X;X;Phospho (STY);X;X;X;X;Phospho (STY);X;X;X;X;X;X;X;X;X;X	XXXXXXXPPPPPPPPPPPPPPPPPPPPXXXX	MTTTSAAAY(0.998)GT(0.163)HLS(0.838)PHVPHR	MT(-82.18)T(-81.04)T(-75.53)S(-68.32)AAAY(27.15)GT(-7.14)HLS(7.14)PHVPHR	9	4	-2.1023	---	---	1408	333	1469	1469	5674	8112	20191107_Haura_KRAS-G12C_TMT-Batch1-H358-pY_run1	10535	5675	8113	20191112_Haura_KRAS-G12C_TMT-Batch2-Calu1-pY_run2	10457	5675	8113	20191112_Haura_KRAS-G12C_TMT-Batch2-Calu1-pY_run2	10457	Phosphorylation (STY)	2	MTTTSAAApYGTHLpSPHVPHR	9>14>>n	1469>1474>>n	0.998	0.836	MTTTSAAAYGTHLSPHVPHR	MTTTSAAApYGTHLpSPHVPHR;P16144;STNSLHRMTTTSAAAYGTHLSPHVPHRVLST;9;2;9>14>>n	ph_P16144:1469
sp|Q6ZRV2|FA83H_HUMAN	sp|Q6ZRV2|FA83H_HUMAN	Q6ZRV2	__Other	Q6ZRV2	Q6ZRV2	sp|Q6ZRV2|FA83H_HUMAN Protein FAM83H OS=Homo sapiens OX=9606 GN=FAM83H PE=1 SV=3	0.881861	9.19296	0.0081281	59.8	39.47	---	1	HQVLHNESKGSPTSAYPERKGSPTPGFSTRR	X;X;X;X;X;X;X;X;X;X;X;X;X;X;X;Phospho (STY);X;X;X;X;X;X;X;X;X;X;X;X;X;X;X	XXXXXXXXXPPPPPPPPPPXXXXXXXXXXXX	GSPT(0.012)S(0.106)AY(0.882)PER	GS(-35.64)PT(-18.77)S(-9.19)AY(9.19)PER	7	2	-0.42018	---	---	2098	740	875	875	3204	4406	20191107_Haura_KRAS-G12C_TMT-Batch1-H358-pY_run1	7353	3204	4406	20191107_Haura_KRAS-G12C_TMT-Batch1-H358-pY_run1	7353	3204	4406	20191107_Haura_KRAS-G12C_TMT-Batch1-H358-pY_run1	7353	Phosphorylation (STY)	1	GSPTSApYPER	7>>n	875>>n	0.882	0.882	GSPTSAYPER	GSPTSApYPER;Q6ZRV2;HQVLHNESKGSPTSAYPERKGSPTPGFSTRR;7;1;7>>n	ph_Q6ZRV2:875
sp|P16234|PGFRA_HUMAN	sp|P16234|PGFRA_HUMAN	P16234	__Other	P16234	P16234	sp|P16234|PGFRA_HUMAN Platelet-derived growth factor receptor alpha OS=Homo sapiens OX=9606 GN=PDGFRA PE=1 SV=1	0.75793	7.96717	0.00708139	61.65	18.138	+	1	TTQYVPMLERKEVSKYSDIQRSLYDRPASYK	X;X;X;X;X;X;X;X;X;X;X;X;X;X;X;Phospho (STY);X;X;X;X;X;X;X;X;X;X;X;X;X;X;X	XXXXXXXXXXXPPPPPPPPPPXXXXXXXXXX	EVS(0.121)KY(0.758)S(0.121)DIQR	EVS(-7.97)KY(7.97)S(-7.97)DIQR	5	3	1.5744	---	---	1411	334	754	754	2271	3077	20191113_Haura_KRAS-G12C_TMT-Batch3-H1792-pY_run2	9047	2271	3077	20191113_Haura_KRAS-G12C_TMT-Batch3-H1792-pY_run2	9047	2271	3077	20191113_Haura_KRAS-G12C_TMT-Batch3-H1792-pY_run2	9047	Phosphorylation (STY)	1	EVSKpYSDIQR	5>>n	754>>n	0.758	0.758	EVSKYSDIQR	EVSKpYSDIQR;P16234;TTQYVPMLERKEVSKYSDIQRSLYDRPASYK;5;1;5>>n	ph_P16234:754
sp|Q15464|SHB_HUMAN	sp|Q15464|SHB_HUMAN	Q15464	__Other	Q15464	Q15464	sp|Q15464|SHB_HUMAN SH2 domain-containing adapter protein B OS=Homo sapiens OX=9606 GN=SHB PE=1 SV=2	1	82.4706	2.10995e-46	245.69	201.48	+	1	PGSSLRKLRAMCRLDYCGGSGEPGGVQRAFS	X;X;X;X;X;X;X;X;X;X;X;X;X;X;X;Phospho (STY);X;X;X;X;X;X;X;X;X;X;X;X;X;X;X	XXXXXXXXXXXXXPPPPPPPPPPPPPPPXXX	LDY(1)CGGSGEPGGVQR	LDY(82.47)CGGS(-82.47)GEPGGVQR	3	3	-1.5288	---	---	1995	669	114	114	4864	6976	20191107_Haura_KRAS-G12C_TMT-Batch1-H358-pY_run1	10720	4871	6989	20191112_Haura_KRAS-G12C_TMT-Batch2-Calu1-pY_run2	10641	4871	6989	20191112_Haura_KRAS-G12C_TMT-Batch2-Calu1-pY_run2	10641	Phosphorylation (STY)	1	LDpYCGGSGEPGGVQR	3>>n	114>>n	1	1	LDYCGGSGEPGGVQR	LDpYCGGSGEPGGVQR;Q15464;PGSSLRKLRAMCRLDYCGGSGEPGGVQRAFS;3;1;3>>n	ph_Q15464:114
sp|P35221|CTNA1_HUMAN	sp|P35221|CTNA1_HUMAN	P35221	__Other	P35221	P35221	sp|P35221|CTNA1_HUMAN Catenin alpha-1 OS=Homo sapiens OX=9606 GN=CTNNA1 PE=1 SV=1	0.994418	25.4639	0.00223261	74.12	67.539	---	1	RKAVLMIRTPEELDDSDFETEDFDVRSRTSV	X;X;X;X;X;X;X;X;X;X;X;X;X;X;X;Phospho (STY);X;X;X;X;X;X;X;X;X;X;X;X;X;X;X	XXXXXXXXPPPPPPPPPPPPPPPPPPXXXXX	T(0.003)PEELDDS(0.994)DFET(0.003)EDFDVR	T(-25.46)PEELDDS(25.46)DFET(-25.57)EDFDVR	8	3	-0.8679	---	---	188	414	641	641	8531	12015	20191113_Haura_KRAS-G12C_TMT-Batch3-H1792-pY_run1	16815	8531	12015	20191113_Haura_KRAS-G12C_TMT-Batch3-H1792-pY_run1	16815	8531	12015	20191113_Haura_KRAS-G12C_TMT-Batch3-H1792-pY_run1	16815	Phosphorylation (STY)	1	TPEELDDpSDFETEDFDVR	8>>n	641>>n	0.994	0.994	TPEELDDSDFETEDFDVR	TPEELDDpSDFETEDFDVR;P35221;RKAVLMIRTPEELDDSDFETEDFDVRSRTSV;8;1;8>>n	ph_P35221:641
sp|Q96PD2|DCBD2_HUMAN	sp|Q96PD2|DCBD2_HUMAN	Q96PD2	__Other	Q96PD2	Q96PD2	sp|Q96PD2|DCBD2_HUMAN Discoidin, CUB and LCCL domain-containing protein 2 OS=Homo sapiens OX=9606 GN=DCBLD2 PE=1 SV=1	0.999685	35.1096	2.62784e-38	236.77	166.81	+	1	CAWHWRNRKKKTEGTYDLPYWDRAGWWKGMK	X;X;X;X;X;X;X;X;X;X;X;X;X;X;X;Phospho (STY);X;X;X;X;X;X;X;X;X;X;X;X;X;X;X	XXXXXXXXXPPPPPPPPPPPPPPXXXXXXXX	TEGTY(1)DLPYWDR	T(-51.8)EGT(-35.11)Y(35.11)DLPY(-89.13)WDR	5	3	-1.1182	---	---	2381	924	565	565	8292	11704	20191112_Haura_KRAS-G12C_TMT-Batch2-Calu1-pY_run1	15218	8293	11707	20191112_Haura_KRAS-G12C_TMT-Batch2-Calu1-pY_run2	15422	8293	11707	20191112_Haura_KRAS-G12C_TMT-Batch2-Calu1-pY_run2	15422	Phosphorylation (STY)	1	TEGTpYDLPYWDR	5>>n	565>>n	1	1	TEGTYDLPYWDR	TEGTpYDLPYWDR;Q96PD2;CAWHWRNRKKKTEGTYDLPYWDRAGWWKGMK;5;1;5>>n	ph_Q96PD2:565
REV__sp|P16499|PDE6A_HUMAN	REV__sp|P16499|PDE6A_HUMAN	---	__REV	REV__P16499	REV__P16499	---	0.996128	23.8633	0.0442094	41.189	18.715	+	2	---	X;X;X;X;X;X;X;X;X;X;X;X;X;X;X;Phospho (STY);X;X;X;Phospho (STY);X;X;X;X;X;X;X;X;X;X;X	XXXXXXXXXXXXXXPPPPPPPPXXXXXXXXX	AY(0.996)HLNY(0.946)Y(0.058)K	AY(23.86)HLNY(12.45)Y(-12.45)K	2	3	-1.9844	+	---	985	27	833	833	946	1325	20191113_Haura_KRAS-G12C_TMT-Batch3-H1792-pY_run2	9181	946	1325	20191113_Haura_KRAS-G12C_TMT-Batch3-H1792-pY_run2	9181	946	1325	20191113_Haura_KRAS-G12C_TMT-Batch3-H1792-pY_run2	9181	Phosphorylation (STY)	2	ApYHLNpYYK	2>6>>n	833>837>>n	0.996	0.942	AYHLNYYK	ApYHLNpYYK;---;---;2;2;2>6>>n	ph_REV__P16499:833
REV__sp|P16499|PDE6A_HUMAN	REV__sp|P16499|PDE6A_HUMAN	---	__REV	REV__P16499	REV__P16499	---	0.946335	12.4457	0.0442094	41.189	18.715	+	2	---	X;X;X;X;X;X;X;X;X;X;X;Phospho (STY);X;X;X;Phospho (STY);X;X;X;X;X;X;X;X;X;X;X;X;X;X;X	XXXXXXXXXXPPPPPPPPXXXXXXXXXXXXX	AY(0.996)HLNY(0.946)Y(0.058)K	AY(23.86)HLNY(12.45)Y(-12.45)K	6	3	-1.9844	+	---	986	27	837	837	946	1325	20191113_Haura_KRAS-G12C_TMT-Batch3-H1792-pY_run2	9181	946	1325	20191113_Haura_KRAS-G12C_TMT-Batch3-H1792-pY_run2	9181	946	1325	20191113_Haura_KRAS-G12C_TMT-Batch3-H1792-pY_run2	9181	Phosphorylation (STY)	2	ApYHLNpYYK	2>6>>n	833>837>>n	0.946	0.942	AYHLNYYK	ApYHLNpYYK;---;---;6;2;2>6>>n	ph_REV__P16499:837
sp|Q9P273|TEN3_HUMAN	sp|Q9P273|TEN3_HUMAN	Q9P273	__Other	Q9P273	Q9P273	sp|Q9P273|TEN3_HUMAN Teneurin-3 OS=Homo sapiens OX=9606 GN=TENM3 PE=2 SV=3	0.55112	0.895433	2.07542e-05	101.67	82.091	---	1	YCSLTKSRREKERRYTNSSADNEECRVPTQK	Phospho (STY);X;Phospho (STY);X;X;X;X;X;X;X;X;X;X;X;X;Phospho (STY);X;X;X;X;X;X;X;X;X;X;X;X;X;X;X	XXXXXXXXXXXXXXPPPPPPPPPPPPPPPPP	Y(0.448)T(0.551)NSSADNEECRVPTQK	Y(-0.9)T(0.9)NS(-32.15)S(-37.16)ADNEECRVPT(-96.56)QK	2	3	0.016971	---	---	934	1061	24	24	10415	14695	20191112_Haura_KRAS-G12C_TMT-Batch2-Calu1-pY_run1	8801	10415	14695	20191112_Haura_KRAS-G12C_TMT-Batch2-Calu1-pY_run1	8801	10415	14695	20191112_Haura_KRAS-G12C_TMT-Batch2-Calu1-pY_run1	8801	Phosphorylation (STY)	1	YpTNSSADNEECRVPTQK	2>n	24>n	0.551	0.551	YTNSSADNEECRVPTQK	YpTNSSADNEECRVPTQK;Q9P273;YCSLTKSRREKERRYTNSSADNEECRVPTQK;2;1;2>n	ph_Q9P273:24
sp|P63261|ACTG_HUMAN	sp|P63261|ACTG_HUMAN	P60709;P62736;P63261;P63267;P68032;P68133	__Other	P63261	P63261	sp|P63261|ACTG_HUMAN Actin, cytoplasmic 2 OS=Homo sapiens OX=9606 GN=ACTG1 PE=1 SV=1;sp|P60709|ACTB_HUMAN Actin, cytoplasmic 1 OS=Homo sapiens OX=9606 GN=ACTB PE=1 SV=1;sp|P63267|ACTH_HUMAN Actin, gamma-enteric smooth muscle OS=Homo sapiens OX=9606 GN=ACTG	0.991264	20.5486	0.000535181	119.76	103.13	+	1	PRHQGVMVGMGQKDSYVGDEAQSKRGILTLK	X;X;X;X;X;X;X;X;X;X;X;X;X;X;X;Phospho (STY);X;X;X;X;X;X;X;X;X;X;X;X;X;X;X	XXXXXXXXXXXXXPPPPPPPPPPPPXXXXXX	DS(0.009)Y(0.991)VGDEAQSKR	DS(-20.55)Y(20.55)VGDEAQS(-98.92)KR	3	3	-0.34124	---	---	1692	502	53	53	1584	2162	20191112_Haura_KRAS-G12C_TMT-Batch2-Calu1-pY_run2	8200	1584	2162	20191112_Haura_KRAS-G12C_TMT-Batch2-Calu1-pY_run2	8200	1585	2163	20191113_Haura_KRAS-G12C_TMT-Batch3-H1792-pY_run1	8093	Phosphorylation (STY)	1	DSpYVGDEAQSKR	3>>n	53>>n	0.991	0.991	DSYVGDEAQSKR	DSpYVGDEAQSKR;P60709;P62736;P63261;P63267;P68032;P68133;PRHQGVMVGMGQKDSYVGDEAQSKRGILTLK;3;1;3>>n	ph_P63261:53
sp|P08069|IGF1R_HUMAN	sp|P08069|IGF1R_HUMAN	P08069	__Other	P08069	P08069	sp|P08069|IGF1R_HUMAN Insulin-like growth factor 1 receptor OS=Homo sapiens OX=9606 GN=IGF1R PE=1 SV=1	1	53.7564	0.000391988	142.92	112.76	+	1	PGVLVLRASFDERQPYAHMNGGRKNERALPL	X;X;X;X;X;X;X;X;X;X;X;X;X;X;X;Phospho (STY);X;X;X;X;X;X;X;X;X;X;X;X;X;X;X	XXXXXXXXXXXXXPPPPPPPPPPXXXXXXXX	QPY(1)AHMNGGR	QPY(53.76)AHMNGGR	3	3	0.97192	---	---	1324	279	1346	1346	6512	9238	20191112_Haura_KRAS-G12C_TMT-Batch2-Calu1-pY_run2	6271	6509	9235	20191107_Haura_KRAS-G12C_TMT-Batch1-H358-pY_run1	6363	6509	9235	20191107_Haura_KRAS-G12C_TMT-Batch1-H358-pY_run1	6363	Phosphorylation (STY)	1	QPpYAHMNGGR	3,x	1346,x	1	1	QPYAHMNGGR	QPpYAHMNGGR;P08069;PGVLVLRASFDERQPYAHMNGGRKNERALPL;3;1;3,x	ph_P08069:1346
sp|Q15262|PTPRK_HUMAN	sp|Q15262|PTPRK_HUMAN	Q15262	__Other	Q15262	Q15262	sp|Q15262|PTPRK_HUMAN Receptor-type tyrosine-protein phosphatase kappa OS=Homo sapiens OX=9606 GN=PTPRK PE=1 SV=2	0.999997	56.6856	2.38076e-21	190.55	168.4	+	1;2	LLDVPRYLCEGTESPYQTGQLHPAIRVADLL	X;X;X;X;X;X;X;X;X;X;X;X;X;Phospho (STY);X;Phospho (STY);X;X;X;X;X;X;X;X;X;X;X;X;X;X;X	XXXXXXPPPPPPPPPPPPPPPPPPPPXXXXX	YLCEGT(0.002)ES(0.998)PY(1)QTGQLHPAIR	Y(-99.49)LCEGT(-26.42)ES(26.42)PY(56.69)QT(-56.69)GQLHPAIR	10	3	-1.4764	---	---	1980	661	858	858	10101	14274	20191112_Haura_KRAS-G12C_TMT-Batch2-Calu1-pY_run2	14020	10098	14271	20191113_Haura_KRAS-G12C_TMT-Batch3-H1792-pY_run1	12458	10098	14271	20191113_Haura_KRAS-G12C_TMT-Batch3-H1792-pY_run1	12458	Phosphorylation (STY)	2	YLCEGTEpSPpYQTGQLHPAIR	10,8>>n	858,856>>n	1	0.998	YLCEGTESPYQTGQLHPAIR	YLCEGTEpSPpYQTGQLHPAIR;Q15262;LLDVPRYLCEGTESPYQTGQLHPAIRVADLL;10;2;10,8>>n	ph_Q15262:858
sp|P54760|EPHB4_HUMAN	sp|P54760|EPHB4_HUMAN	P54760	__Other	P54760	P54760	sp|P54760|EPHB4_HUMAN Ephrin type-B receptor 4 OS=Homo sapiens OX=9606 GN=EPHB4 PE=1 SV=2	1	65.9456	1.5212e-08	101.74	80.542	+	1;2	QSNGREAEYSDKHGQYLIGHGTKVYIDPFTY	X;X;X;X;X;X;X;X;Phospho (STY);Phospho (STY);X;X;X;X;X;Phospho (STY);X;X;X;X;X;X;X;X;Phospho (STY);X;X;X;X;Phospho (STY);Phospho (STY)	XXXXXPPPPPPPPPPPPPPPPPPXXXXXXXX	HGQY(1)LIGHGTK	HGQY(65.95)LIGHGT(-65.95)K	4	3	-1.4472	---	---	1660	486	581	581	3475	4745	20191107_Haura_KRAS-G12C_TMT-Batch1-H358-pY_run2	8362	1717	2315	20191112_Haura_KRAS-G12C_TMT-Batch2-Calu1-pY_run1	9737	1717	2315	20191112_Haura_KRAS-G12C_TMT-Batch2-Calu1-pY_run1	9737	Phosphorylation (STY)	1	HGQpYLIGHGTK	4>>n	581>>n	1	1	HGQYLIGHGTK	HGQpYLIGHGTK;P54760;QSNGREAEYSDKHGQYLIGHGTKVYIDPFTY;4;1;4>>n	ph_P54760:581
sp|Q9C0B5|ZDHC5_HUMAN	sp|Q9C0B5|ZDHC5_HUMAN	Q9C0B5	__Other	Q9C0B5	Q9C0B5	sp|Q9C0B5|ZDHC5_HUMAN Palmitoyltransferase ZDHHC5 OS=Homo sapiens OX=9606 GN=ZDHHC5 PE=1 SV=2	0.985322	19.2558	0.00287657	86.011	61.676	+	1	PEPGPTAPYLGRSMSYSSQKAQPGVSETEEV	X;X;X;X;X;X;X;X;Phospho (STY);X;X;X;X;X;X;Phospho (STY);X;X;X;X;X;X;X;X;X;X;X;X;X;X;X	XXXXXXXXXXXXPPPPPPPPXXXXXXXXXXX	S(0.001)MS(0.012)Y(0.985)S(0.001)SQK	S(-29.03)MS(-19.26)Y(19.26)S(-28.27)S(-35.39)QK	4	3	-1.5554	---	---	2495	972	637	637	7599	10781	20191113_Haura_KRAS-G12C_TMT-Batch3-H1792-pY_run1	8631	7595	10777	20191107_Haura_KRAS-G12C_TMT-Batch1-H358-pY_run2	8769	7595	10777	20191107_Haura_KRAS-G12C_TMT-Batch1-H358-pY_run2	8769	Phosphorylation (STY)	1	SMSpYSSQK	4>>n	637>>n	0.985	0.985	SMSYSSQK	SMSpYSSQK;Q9C0B5;PEPGPTAPYLGRSMSYSSQKAQPGVSETEEV;4;1;4>>n	ph_Q9C0B5:637
sp|Q8NDI1|EHBP1_HUMAN	sp|Q8NDI1|EHBP1_HUMAN	Q8NDI1	__Other	Q8NDI1	Q8NDI1	sp|Q8NDI1|EHBP1_HUMAN EH domain-binding protein 1 OS=Homo sapiens OX=9606 GN=EHBP1 PE=1 SV=3	0.983312	18.1715	1.58327e-05	122.34	99.536	+	1	PITETASPRKTEDSFYNNSYNPFKEVQTPQY	X;X;X;X;X;X;X;X;X;X;X;X;X;X;X;Phospho (STY);X;X;X;X;X;X;X;X;X;X;X;X;X;X;X	XXXXXXXXXPPPPPPPPPPPPPPPXXXXXXX	KT(0.002)EDS(0.015)FY(0.983)NNSYNPFK	KT(-27.61)EDS(-18.17)FY(18.17)NNS(-56.53)Y(-65.69)NPFK	7	3	2.3727	---	---	2225	830	304	304	4618	6626	20191112_Haura_KRAS-G12C_TMT-Batch2-Calu1-pY_run1	14431	4618	6626	20191112_Haura_KRAS-G12C_TMT-Batch2-Calu1-pY_run1	14431	4618	6626	20191112_Haura_KRAS-G12C_TMT-Batch2-Calu1-pY_run1	14431	Phosphorylation (STY)	1	KTEDSFpYNNSYNPFK	7>>n	304>>n	0.983	0.983	KTEDSFYNNSYNPFK	KTEDSFpYNNSYNPFK;Q8NDI1;PITETASPRKTEDSFYNNSYNPFKEVQTPQY;7;1;7>>n	ph_Q8NDI1:304
sp|Q15654|TRIP6_HUMAN	sp|Q15654|TRIP6_HUMAN	Q15654	__Other	Q15654	Q15654	sp|Q15654|TRIP6_HUMAN Thyroid receptor-interacting protein 6 OS=Homo sapiens OX=9606 GN=TRIP6 PE=1 SV=3	1	90.8614	0.00120718	115.7	95.996	+	1	RRPDRQAYEPPPPPAYRTGSLKPNPASPLPA	X;X;X;X;X;X;X;X;X;X;X;X;X;X;X;Phospho (STY);X;X;X;X;X;X;X;X;X;X;X;X;X;X;X	XXXXXPPPPPPPPPPPPXXXXXXXXXXXXXX	QAYEPPPPPAY(1)R	QAY(-90.86)EPPPPPAY(90.86)R	11	2	0.14178	---	---	1997	670	131	131	6229	8849	20191112_Haura_KRAS-G12C_TMT-Batch2-Calu1-pY_run1	10682	6229	8849	20191112_Haura_KRAS-G12C_TMT-Batch2-Calu1-pY_run1	10682	6232	8852	20191112_Haura_KRAS-G12C_TMT-Batch2-Calu1-pY_run2	10838	Phosphorylation (STY)	1	QAYEPPPPPApYR	11>>n	131>>n	1	1	QAYEPPPPPAYR	QAYEPPPPPApYR;Q15654;RRPDRQAYEPPPPPAYRTGSLKPNPASPLPA;11;1;11>>n	ph_Q15654:131
sp|Q02487|DSC2_HUMAN	sp|Q02487|DSC2_HUMAN	Q02487	__Other	Q02487	Q02487	sp|Q02487|DSC2_HUMAN Desmocollin-2 OS=Homo sapiens OX=9606 GN=DSC2 PE=1 SV=1	1	120.062	0.0016514	120.06	98.43	+	1	SEWHSFTQPRLGEKVYLCNQDENHKHAQDYV	X;X;X;X;X;X;X;X;X;X;X;X;X;X;X;Phospho (STY);X;X;X;X;X;X;X;X;X;X;X;X;X;Phospho (STY);X	XXXXXXXXXXXXXXPPPPPPPPPPPXXXXXX	VY(1)LCNQDENHK	VY(120.06)LCNQDENHK	2	3	2.6874	---	---	1783	562	839	839	9659	13736	20191107_Haura_KRAS-G12C_TMT-Batch1-H358-pY_run2	10386	9659	13736	20191107_Haura_KRAS-G12C_TMT-Batch1-H358-pY_run2	10386	9658	13735	20191107_Haura_KRAS-G12C_TMT-Batch1-H358-pY_run1	10418	Phosphorylation (STY)	1	VpYLCNQDENHK	2,x	839,x	1	1	VYLCNQDENHK	VpYLCNQDENHK;Q02487;SEWHSFTQPRLGEKVYLCNQDENHKHAQDYV;2;1;2,x	ph_Q02487:839
CON__P00761	CON__P00761	CON__P07477;Q9BYE2;CON__P00761;CON__P07477	__Other	CON__P00761	CON__P00761	sp|P07477|TRY1_HUMAN Trypsin-1 OS=Homo sapiens OX=9606 GN=PRSS1 PE=1 SV=1;sp|Q9BYE2|TMPSD_HUMAN Transmembrane protease serine 13 OS=Homo sapiens OX=9606 GN=TMPRSS13 PE=2 SV=5	0.89342	9.23379	0.0193522	56.432	39.8	+	1	VSWGYGCAQKNKPGVYTKVCNYVNWIQQTIA	X;X;X;X;X;X;X;X;X;X;X;X;X;X;X;Phospho (STY);X;X;X;X;X;X;X;X;X;X;X;X;X;X;X	XXXXXXXXXXPPPPPPPPXXXXXXXXXXXXX	NKPGVY(0.893)T(0.107)K	NKPGVY(9.23)T(-9.23)K	6	3	3.5818	---	+	960	0	214	214	5815	8340	20191112_Haura_KRAS-G12C_TMT-Batch2-Calu1-pY_run1	8832	5815	8340	20191112_Haura_KRAS-G12C_TMT-Batch2-Calu1-pY_run1	8832	5815	8340	20191112_Haura_KRAS-G12C_TMT-Batch2-Calu1-pY_run1	8832	Phosphorylation (STY)	1	NKPGVpYTK	6>>n	214>>n	0.893	0.893	NKPGVYTK	NKPGVpYTK;CON__P07477;Q9BYE2;CON__P00761;CON__P07477;VSWGYGCAQKNKPGVYTKVCNYVNWIQQTIA;6;1;6>>n	ph_P00761:214
sp|P61978|HNRPK_HUMAN	sp|P61978|HNRPK_HUMAN	P61978	__Other	P61978	P61978	sp|P61978|HNRPK_HUMAN Heterogeneous nuclear ribonucleoprotein K OS=Homo sapiens OX=9606 GN=HNRNPK PE=1 SV=1	1	75.4602	0.000335878	144.38	79.337	+	1	PPGRGGRPMPPSRRDYDDMSPRRGPPPPPPG	X;X;X;X;X;X;X;X;X;X;X;X;X;X;X;Phospho (STY);X;X;X;X;X;X;X;X;X;X;X;X;X;X;X	XXXXXXXXXXXXXPPPPPPPPPXXXXXXXXX	DY(1)DDMSPR	DY(75.46)DDMS(-75.46)PR	2	2	0.090255	---	---	1705	511	280	280	1652	2239	20191112_Haura_KRAS-G12C_TMT-Batch2-Calu1-pY_run1	8934	1652	2239	20191112_Haura_KRAS-G12C_TMT-Batch2-Calu1-pY_run1	8934	1653	2240	20191112_Haura_KRAS-G12C_TMT-Batch2-Calu1-pY_run2	9044	Phosphorylation (STY)	1	DpYDDMSPR	2>>n	280>>n	1	1	DYDDMSPR	DpYDDMSPR;P61978;PPGRGGRPMPPSRRDYDDMSPRRGPPPPPPG;2;1;2>>n	ph_P61978:280
sp|Q9UJU6|DBNL_HUMAN	sp|Q9UJU6|DBNL_HUMAN	Q9UJU6	__Other	Q9UJU6	Q9UJU6	sp|Q9UJU6|DBNL_HUMAN Drebrin-like protein OS=Homo sapiens OX=9606 GN=DBNL PE=1 SV=1	1	75.0257	0.00121675	94.297	56.21	---	1	RRERELREAARREQRYQEQGGEASPQRTWEQ	X;X;X;X;X;X;X;X;X;X;X;X;X;X;X;Phospho (STY);X;X;X;X;X;X;X;X;X;X;X;X;X;X;X	XXXXXXXXXXXXXXXPPPPPPPPPPPPXXXX	Y(1)QEQGGEASPQR	Y(75.03)QEQGGEAS(-75.03)PQR	1	2	0.047423	---	---	2662	1078	224	224	10246	14497	20191112_Haura_KRAS-G12C_TMT-Batch2-Calu1-pY_run2	6381	10246	14497	20191112_Haura_KRAS-G12C_TMT-Batch2-Calu1-pY_run2	6381	10247	14498	20191112_Haura_KRAS-G12C_TMT-Batch2-Calu1-pY_run2	6397	Phosphorylation (STY)	1	pYQEQGGEASPQR	1>>n	224>>n	1	1	YQEQGGEASPQR	pYQEQGGEASPQR;Q9UJU6;RRERELREAARREQRYQEQGGEASPQRTWEQ;1;1;1>>n	ph_Q9UJU6:224
sp|Q9Y6N7|ROBO1_HUMAN	sp|Q9Y6N7|ROBO1_HUMAN	Q9Y6N7	__Other	Q9Y6N7	Q9Y6N7	sp|Q9Y6N7|ROBO1_HUMAN Roundabout homolog 1 OS=Homo sapiens OX=9606 GN=ROBO1 PE=1 SV=1	1	92.3071	5.14924e-44	223.35	205.75	+	1	WKPLGQQKQEVAPVQYNIVEQNKLNKDYRAN	X;X;X;X;X;X;X;X;X;X;X;X;X;X;X;Phospho (STY);X;X;X;X;X;X;X;X;X;X;X;X;X;X;X	XXXXXXXXPPPPPPPPPPPPPPPPPPPPPXX	QEVAPVQY(1)NIVEQNKLNK	QEVAPVQY(92.31)NIVEQNKLNK	8	3	2.2566	---	---	2766	1138	1114	1114	6324	8997	20191112_Haura_KRAS-G12C_TMT-Batch2-Calu1-pY_run2	13935	6321	8994	20191112_Haura_KRAS-G12C_TMT-Batch2-Calu1-pY_run1	13840	6321	8994	20191112_Haura_KRAS-G12C_TMT-Batch2-Calu1-pY_run1	13840	Phosphorylation (STY)	1	QEVAPVQpYNIVEQNKLNK	8,x	1114,x	1	1	QEVAPVQYNIVEQNKLNK	QEVAPVQpYNIVEQNKLNK;Q9Y6N7;WKPLGQQKQEVAPVQYNIVEQNKLNKDYRAN;8;1;8,x	ph_Q9Y6N7:1114
sp|O75581|LRP6_HUMAN	sp|O75581|LRP6_HUMAN	O75581	__Other	O75581	O75581	sp|O75581|LRP6_HUMAN Low-density lipoprotein receptor-related protein 6 OS=Homo sapiens OX=9606 GN=LRP6 PE=1 SV=2	0.547193	2.37089	2.18119e-10	106.73	98.24	---	1	TTPCSTDVCDSDYAPSRRMTSVATAKGYTSD	X;X;X;X;X;X;X;X;X;X;X;X;X;X;X;Phospho (STY);X;X;X;X;X;X;X;X;X;X;X;X;X;X;X	PPPPPPPPPPPPPPPPPPXXXXXXXXXXXXX	HFAPPTTPCSTDVCDS(0.136)DY(0.317)APS(0.547)RR	HFAPPT(-63.52)T(-63.78)PCS(-46.13)T(-46.13)DVCDS(-6.05)DY(-2.37)APS(2.37)RR	21	3	-1.1311	---	---	84	204	1544	1544	3457	4727	20191112_Haura_KRAS-G12C_TMT-Batch2-Calu1-pY_run2	10474	3459	4729	20191113_Haura_KRAS-G12C_TMT-Batch3-H1792-pY_run2	10391	3457	4727	20191112_Haura_KRAS-G12C_TMT-Batch2-Calu1-pY_run2	10474	Phosphorylation (STY)	1	HFAPPTTPCSTDVCDSDYAPpSRR	21>n	1544>n	0.547	0.547	HFAPPTTPCSTDVCDSDYAPSRR	HFAPPTTPCSTDVCDSDYAPpSRR;O75581;TTPCSTDVCDSDYAPSRRMTSVATAKGYTSD;21;1;21>n	ph_O75581:1544
sp|P11413|G6PD_HUMAN	sp|P11413|G6PD_HUMAN	P11413	__Other	P11413	P11413	sp|P11413|G6PD_HUMAN Glucose-6-phosphate 1-dehydrogenase OS=Homo sapiens OX=9606 GN=G6PD PE=1 SV=4	0.999999	62.2874	0.000877904	119.22	92.125	+	1	GPTEADELMKRVGFQYEGTYKWVNPHKL___	X;X;X;X;X;X;X;X;X;X;X;X;X;X;X;Phospho (STY);X;X;X;X;X;X;X;X;X;X;X;X;X;X;X	XXXXXXXXXXXPPPPPPPPPPXXXXXXXXXX	VGFQY(1)EGTYK	VGFQY(62.29)EGT(-62.29)Y(-85.02)K	5	3	0.88464	---	---	1376	308	503	503	9078	12788	20191113_Haura_KRAS-G12C_TMT-Batch3-H1792-pY_run1	13756	9078	12788	20191113_Haura_KRAS-G12C_TMT-Batch3-H1792-pY_run1	13756	9076	12785	20191112_Haura_KRAS-G12C_TMT-Batch2-Calu1-pY_run2	13962	Phosphorylation (STY)	1	VGFQpYEGTYK	5>>n	503>>n	1	1	VGFQYEGTYK	VGFQpYEGTYK;P11413;GPTEADELMKRVGFQYEGTYKWVNPHKL___;5;1;5>>n	ph_P11413:503
sp|Q9HAU0|PKHA5_HUMAN	sp|Q9HAU0|PKHA5_HUMAN	Q9HAU0	__Other	Q9HAU0	Q9HAU0	sp|Q9HAU0|PKHA5_HUMAN Pleckstrin homology domain-containing family A member 5 OS=Homo sapiens OX=9606 GN=PLEKHA5 PE=1 SV=1	0.829268	7.24812	0.00702907	47.68	37.195	---	1	ADLRGGNRPNTGPLYTEADRVIQRTNSMQQL	X;X;X;X;X;X;X;X;X;X;X;X;X;X;X;Phospho (STY);X;X;X;X;X;X;X;X;X;X;X;X;X;X;X	XXXXPPPPPPPPPPPPPPPPPPPPXXXXXXX	GGNRPNT(0.014)GPLY(0.156)T(0.829)EADRVIQR	GGNRPNT(-17.59)GPLY(-7.25)T(7.25)EADRVIQR	12	3	-1.3266	---	---	918	1004	399	399	2828	3924	20191112_Haura_KRAS-G12C_TMT-Batch2-Calu1-pY_run1	11075	2828	3924	20191112_Haura_KRAS-G12C_TMT-Batch2-Calu1-pY_run1	11075	2828	3924	20191112_Haura_KRAS-G12C_TMT-Batch2-Calu1-pY_run1	11075	Phosphorylation (STY)	1	GGNRPNTGPLYpTEADRVIQR	12>>n	399>>n	0.829	0.829	GGNRPNTGPLYTEADRVIQR	GGNRPNTGPLYpTEADRVIQR;Q9HAU0;ADLRGGNRPNTGPLYTEADRVIQRTNSMQQL;12;1;12>>n	ph_Q9HAU0:399
sp|O75581|LRP6_HUMAN	sp|O75581|LRP6_HUMAN	O75581	__Other	O75581	O75581	sp|O75581|LRP6_HUMAN Low-density lipoprotein receptor-related protein 6 OS=Homo sapiens OX=9606 GN=LRP6 PE=1 SV=2	0.923755	14.1585	0.00125244	119.53	75.211	+	1	SSNSPSTHRSYSYRPYSYRHFAPPTTPCSTD	X;X;X;X;X;X;X;X;X;X;X;X;X;X;X;Phospho (STY);X;X;X;X;X;X;X;X;X;X;X;X;X;X;X	XXXXXXXXXPPPPPPPPPPXXXXXXXXXXXX	S(0.001)Y(0.004)S(0.004)Y(0.035)RPY(0.924)S(0.031)Y(0.001)R	S(-30.46)Y(-23.74)S(-23.74)Y(-14.16)RPY(14.16)S(-14.73)Y(-29.48)R	7	3	-1.4059	---	---	1184	204	1520	1520	8156	11521	20191112_Haura_KRAS-G12C_TMT-Batch2-Calu1-pY_run2	9318	8154	11519	20191112_Haura_KRAS-G12C_TMT-Batch2-Calu1-pY_run1	9186	8156	11521	20191112_Haura_KRAS-G12C_TMT-Batch2-Calu1-pY_run2	9318	Phosphorylation (STY)	1	SYSYRPpYSYR	7>>n	1520>>n	0.924	0.924	SYSYRPYSYR	SYSYRPpYSYR;O75581;SSNSPSTHRSYSYRPYSYRHFAPPTTPCSTD;7;1;7>>n	ph_O75581:1520
sp|P54753|EPHB3_HUMAN	sp|P54753|EPHB3_HUMAN	P54753	__Other	P54753	P54753	sp|P54753|EPHB3_HUMAN Ephrin type-B receptor 3 OS=Homo sapiens OX=9606 GN=EPHB3 PE=1 SV=2	0.880808	9.41102	2.36167e-05	84.874	72.728	+	1	FGLSRFLEDDPSDPTYTSSLGGKIPIRWTAP	X;X;X;X;X;X;X;X;X;X;X;X;X;X;X;Phospho (STY);X;X;X;X;X;X;X;X;X;X;X;X;X;X;X	XXXXXPPPPPPPPPPPPPPPPPPPPPPXXXX	FLEDDPS(0.002)DPT(0.101)Y(0.881)T(0.014)S(0.002)SLGGK	FLEDDPS(-27.35)DPT(-9.41)Y(9.41)T(-17.91)S(-26.2)S(-34.27)LGGK	11	3	0.84933	---	---	1654	484	792	792	2446	3329	20191107_Haura_KRAS-G12C_TMT-Batch1-H358-pY_run1	16437	2446	3329	20191107_Haura_KRAS-G12C_TMT-Batch1-H358-pY_run1	16437	2446	3329	20191107_Haura_KRAS-G12C_TMT-Batch1-H358-pY_run1	16437	Phosphorylation (STY)	1	FLEDDPSDPTpYTSSLGGK	11>>n	792>>n	0.881	0.881	FLEDDPSDPTYTSSLGGK	FLEDDPSDPTpYTSSLGGK;P54753;FGLSRFLEDDPSDPTYTSSLGGKIPIRWTAP;11;1;11>>n	ph_P54753:792
sp|Q9NQS3|NECT3_HUMAN	sp|Q9NQS3|NECT3_HUMAN	Q9NQS3	__Other	Q9NQS3	Q9NQS3	sp|Q9NQS3|NECT3_HUMAN Nectin-3 OS=Homo sapiens OX=9606 GN=NECTIN3 PE=1 SV=1	0.999696	35.164	0.00935649	62.262	43.482	+	1	AGIFCYRRRRTFRGDYFAKNYIPPSDMQKES	X;X;X;X;X;X;X;X;X;X;X;X;X;X;X;Phospho (STY);X;X;X;X;X;X;X;X;X;X;X;X;X;X;X	XXXXXXXXXXPPPPPPPPPXXXXXXXXXXXX	TFRGDY(1)FAK	T(-35.16)FRGDY(35.16)FAK	6	3	1.2854	---	---	2584	1020	438	438	8323	11742	20191113_Haura_KRAS-G12C_TMT-Batch3-H1792-pY_run1	12126	8323	11742	20191113_Haura_KRAS-G12C_TMT-Batch3-H1792-pY_run1	12126	8323	11742	20191113_Haura_KRAS-G12C_TMT-Batch3-H1792-pY_run1	12126	Phosphorylation (STY)	1	TFRGDpYFAK	6>>n	438>>n	1	1	TFRGDYFAK	TFRGDpYFAK;Q9NQS3;AGIFCYRRRRTFRGDYFAKNYIPPSDMQKES;6;1;6>>n	ph_Q9NQS3:438
sp|P09622|DLDH_HUMAN	sp|P09622|DLDH_HUMAN	P09622	__Other	P09622	P09622	sp|P09622|DLDH_HUMAN Dihydrolipoyl dehydrogenase, mitochondrial OS=Homo sapiens OX=9606 GN=DLD PE=1 SV=2	1	92.4393	0.000261838	107.66	92.998	+	1	IAHLFKQNKVVHVNGYGKITGKNQVTATKAD	X;X;X;X;X;X;X;X;X;X;X;X;X;X;X;Phospho (STY);X;X;X;X;X;X;X;X;X;X;X;X;X;X;X	XXXXXXXXXPPPPPPPPPXXXXXXXXXXXXX	VVHVNGY(1)GK	VVHVNGY(92.44)GK	7	3	1.6682	---	---	1356	292	153	153	9545	13560	20191113_Haura_KRAS-G12C_TMT-Batch3-H1792-pY_run2	9429	9544	13559	20191113_Haura_KRAS-G12C_TMT-Batch3-H1792-pY_run1	9379	9544	13559	20191113_Haura_KRAS-G12C_TMT-Batch3-H1792-pY_run1	9379	Phosphorylation (STY)	1	VVHVNGpYGK	7,x	153,x	1	1	VVHVNGYGK	VVHVNGpYGK;P09622;IAHLFKQNKVVHVNGYGKITGKNQVTATKAD;7;1;7,x	ph_P09622:153
sp|P08670|VIME_HUMAN	sp|P08670|VIME_HUMAN	P08670	__Other	P08670	P08670	sp|P08670|VIME_HUMAN Vimentin OS=Homo sapiens OX=9606 GN=VIM PE=1 SV=4	0.792012	5.80694	8.2568e-108	211.39	161.35	---	1	MFGGPGTASRPSSSRSYVTTSTRTYSLGSAL	X;X;X;X;X;X;X;X;X;X;X;X;X;X;X;Phospho (STY);X;X;X;X;X;X;X;X;Phospho (STY);Phospho (STY);X;X;X;X;X	XXXXXXXXXXXXXXXPPPPPPPPXXXXXXXX	S(0.792)Y(0.208)VTTSTR	S(5.81)Y(-5.81)VT(-64.05)T(-115.85)S(-139.11)T(-161.92)R	1	2	-0.29907	---	---	145	285	29	29	8170	11542	20191112_Haura_KRAS-G12C_TMT-Batch2-Calu1-pY_run2	7422	8170	11542	20191112_Haura_KRAS-G12C_TMT-Batch2-Calu1-pY_run2	7422	8170	11542	20191112_Haura_KRAS-G12C_TMT-Batch2-Calu1-pY_run2	7422	Phosphorylation (STY)	1	pSYVTTSTR	1>>n	29>>n	0.792	0.792	SYVTTSTR	pSYVTTSTR;P08670;MFGGPGTASRPSSSRSYVTTSTRTYSLGSAL;1;1;1>>n	ph_P08670:29
sp|Q8NHW5|RLA0L_HUMAN	sp|Q8NHW5|RLA0L_HUMAN	P05388;Q8NHW5	__Other	Q8NHW5	Q8NHW5	sp|Q8NHW5|RLA0L_HUMAN 60S acidic ribosomal protein P0-like OS=Homo sapiens OX=9606 GN=RPLP0P6 PE=5 SV=1;sp|P05388|RLA0_HUMAN 60S acidic ribosomal protein P0 OS=Homo sapiens OX=9606 GN=RPLP0 PE=1 SV=1	1	48.6398	0.00112699	83.005	62.104	+	1	WKSNYFLKIIQLLDDYPKCFIVGADNVGSKQ	X;X;X;X;X;X;X;X;X;X;X;X;X;X;X;Phospho (STY);X;X;X;X;X;X;X;X;X;X;X;X;X;X;X	XXXXXXXXPPPPPPPPPPXXXXXXXXXXXXX	IIQLLDDY(1)PK	IIQLLDDY(48.64)PK	8	3	-0.60151	---	---	1268	262	24	24	4035	5866	20191113_Haura_KRAS-G12C_TMT-Batch3-H1792-pY_run2	18867	4034	5865	20191113_Haura_KRAS-G12C_TMT-Batch3-H1792-pY_run1	18738	4034	5865	20191113_Haura_KRAS-G12C_TMT-Batch3-H1792-pY_run1	18738	Phosphorylation (STY)	1	IIQLLDDpYPK	8,x	24,x	1	1	IIQLLDDYPK	IIQLLDDpYPK;P05388;Q8NHW5;WKSNYFLKIIQLLDDYPKCFIVGADNVGSKQ;8;1;8,x	ph_Q8NHW5:24
sp|Q8IWW6|RHG12_HUMAN	sp|Q8IWW6|RHG12_HUMAN	Q8IWW6	__Other	Q8IWW6	Q8IWW6	sp|Q8IWW6|RHG12_HUMAN Rho GTPase-activating protein 12 OS=Homo sapiens OX=9606 GN=ARHGAP12 PE=1 SV=1	0.700999	3.77173	0.00122621	117.7	80.14	+	1	EKWLKHVDDQGRQYYYSADGSRSEWELPKYN	X;X;X;X;X;X;X;X;X;X;X;X;X;X;X;Phospho (STY);X;X;X;X;X;X;X;X;X;X;X;X;X;X;X	XXXXXXXXXXXXPPPPPPPPPPXXXXXXXXX	QY(0.002)Y(0.294)Y(0.701)S(0.002)ADGSR	QY(-24.6)Y(-3.77)Y(3.77)S(-24.59)ADGS(-65.84)R	4	2	-0.60392	---	---	2181	794	377	377	6668	9421	20191112_Haura_KRAS-G12C_TMT-Batch2-Calu1-pY_run2	9846	6668	9421	20191112_Haura_KRAS-G12C_TMT-Batch2-Calu1-pY_run2	9846	6668	9421	20191112_Haura_KRAS-G12C_TMT-Batch2-Calu1-pY_run2	9846	Phosphorylation (STY)	1	QYYpYSADGSR	4>>n	377>>n	0.701	0.701	QYYYSADGSR	QYYpYSADGSR;Q8IWW6;EKWLKHVDDQGRQYYYSADGSRSEWELPKYN;4;1;4>>n	ph_Q8IWW6:377
sp|Q9HCM4|E41L5_HUMAN	sp|Q9HCM4|E41L5_HUMAN	Q9HCM4	__Other	Q9HCM4	Q9HCM4	sp|Q9HCM4|E41L5_HUMAN Band 4.1-like protein 5 OS=Homo sapiens OX=9606 GN=EPB41L5 PE=1 SV=3	0.999982	49.0723	0.000238065	126.63	101.31	+	1;2	FIRLGSRFRYSGKTEYQTTKTNKARRSTSFE	X;X;X;X;X;X;X;X;X;X;Phospho (STY);X;X;X;X;Phospho (STY);X;X;X;X;X;X;X;X;X;X;X;X;X;X;X	XXXXXXXPPPPPPPPPPPPPXXXXXXXXXXX	FRYS(0.998)GKT(0.002)EY(1)QTTK	FRY(-57.41)S(26.11)GKT(-26.11)EY(49.07)QT(-49.07)T(-57.8)K	9	4	0.92132	---	---	2567	1012	353	353	2538	3440	20191112_Haura_KRAS-G12C_TMT-Batch2-Calu1-pY_run1	10912	2539	3441	20191112_Haura_KRAS-G12C_TMT-Batch2-Calu1-pY_run2	11070	2539	3441	20191112_Haura_KRAS-G12C_TMT-Batch2-Calu1-pY_run2	11070	Phosphorylation (STY)	2	FRYpSGKTEpYQTTK	9,4>>n	353,348>>n	1	0.998	FRYSGKTEYQTTK	FRYpSGKTEpYQTTK;Q9HCM4;FIRLGSRFRYSGKTEYQTTKTNKARRSTSFE;9;2;9,4>>n	ph_Q9HCM4:353
sp|P56945|BCAR1_HUMAN	sp|P56945|BCAR1_HUMAN	P56945	__Other	P56945	P56945	sp|P56945|BCAR1_HUMAN Breast cancer anti-estrogen resistance protein 1 OS=Homo sapiens OX=9606 GN=BCAR1 PE=1 SV=2	1	79.7657	1.78726e-13	144.01	128.77	+	1;2	SVYLVPTPSKAQQGLYQVPGPSPQFQSPPAK	X;X;X;X;X;X;X;X;X;X;X;X;X;X;X;Phospho (STY);X;X;X;X;X;Phospho (STY);X;X;X;X;Phospho (STY);X;X;X;X	XXXXXXXXXXPPPPPPPPPPPPPPPPPPPPP	AQQGLY(1)QVPGPSPQFQSPPAK	AQQGLY(79.77)QVPGPS(-79.77)PQFQS(-108.51)PPAK	6	3	0.063057	---	---	1680	497	128	128	646	932	20191112_Haura_KRAS-G12C_TMT-Batch2-Calu1-pY_run1	14381	648	936	20191112_Haura_KRAS-G12C_TMT-Batch2-Calu1-pY_run2	14476	648	936	20191112_Haura_KRAS-G12C_TMT-Batch2-Calu1-pY_run2	14476	Phosphorylation (STY)	1	AQQGLpYQVPGPSPQFQSPPAK	6>>n	128>>n	1	1	AQQGLYQVPGPSPQFQSPPAK	AQQGLpYQVPGPSPQFQSPPAK;P56945;SVYLVPTPSKAQQGLYQVPGPSPQFQSPPAK;6;1;6>>n	ph_P56945:128
sp|Q9NQS3|NECT3_HUMAN	sp|Q9NQS3|NECT3_HUMAN	Q9NQS3	__Other	Q9NQS3	Q9NQS3	sp|Q9NQS3|NECT3_HUMAN Nectin-3 OS=Homo sapiens OX=9606 GN=NECTIN3 PE=1 SV=1	0.964144	14.2957	3.23787e-05	84.718	56.856	+	1	NNVENLNRFERPMDYYEDLKMGMKFVSDEHY	X;X;X;X;X;X;X;X;X;X;X;X;X;X;X;Phospho (STY);X;X;X;X;X;X;X;X;X;X;X;X;X;X;X	XXXXXXXXPPPPPPPPPPPPXXXXXXXXXXX	FERPMDY(0.036)Y(0.964)EDLK	FERPMDY(-14.3)Y(14.3)EDLK	8	3	0.9355	---	---	2583	1020	511	511	2395	3251	20191107_Haura_KRAS-G12C_TMT-Batch1-H358-pY_run1	14374	2396	3252	20191107_Haura_KRAS-G12C_TMT-Batch1-H358-pY_run2	14363	2396	3252	20191107_Haura_KRAS-G12C_TMT-Batch1-H358-pY_run2	14363	Phosphorylation (STY)	1	FERPMDYpYEDLK	8>>n	511>>n	0.964	0.964	FERPMDYYEDLK	FERPMDYpYEDLK;Q9NQS3;NNVENLNRFERPMDYYEDLKMGMKFVSDEHY;8;1;8>>n	ph_Q9NQS3:511
sp|Q96PD2|DCBD2_HUMAN	sp|Q96PD2|DCBD2_HUMAN	Q96PD2	__Other	Q96PD2	Q96PD2	sp|Q96PD2|DCBD2_HUMAN Discoidin, CUB and LCCL domain-containing protein 2 OS=Homo sapiens OX=9606 GN=DCBLD2 PE=1 SV=1	0.972129	16.5748	2.64189e-34	206.21	183.74	+	1	TFKATGNQPPPLVGTYNTLLSRTDSCSSAQA	X;X;X;X;X;X;X;X;X;X;X;X;X;X;X;Phospho (STY);X;X;X;X;X;X;X;X;Phospho (STY);X;Phospho (STY);X;X;X;X	XXXPPPPPPPPPPPPPPPPPPPXXXXXXXXX	ATGNQPPPLVGT(0.006)Y(0.972)NT(0.021)LLSR	AT(-161.27)GNQPPPLVGT(-21.9)Y(16.57)NT(-16.57)LLS(-36.65)R	13	3	-0.72483	---	---	2379	924	715	715	781	1090	20191112_Haura_KRAS-G12C_TMT-Batch2-Calu1-pY_run2	15888	778	1083	20191107_Haura_KRAS-G12C_TMT-Batch1-H358-pY_run2	15766	778	1083	20191107_Haura_KRAS-G12C_TMT-Batch1-H358-pY_run2	15766	Phosphorylation (STY)	1	ATGNQPPPLVGTpYNTLLSR	13>>n	715>>n	0.972	0.972	ATGNQPPPLVGTYNTLLSR	ATGNQPPPLVGTpYNTLLSR;Q96PD2;TFKATGNQPPPLVGTYNTLLSRTDSCSSAQA;13;1;13>>n	ph_Q96PD2:715
sp|Q99959|PKP2_HUMAN	sp|Q99959|PKP2_HUMAN	Q99959	__Other	Q99959	Q99959	sp|Q99959|PKP2_HUMAN Plakophilin-2 OS=Homo sapiens OX=9606 GN=PKP2 PE=1 SV=2	0.806267	6.07213	2.26427e-10	100.68	91.247	---	3	SLRHPLRRLEISPDSSPERAHYTHSDYQYSQ	X;X;X;X;X;X;X;X;X;X;X;Phospho (STY);X;X;X;Phospho (STY);X;X;X;X;X;Phospho (STY);Phospho (STY);X;X;X;Phospho (STY);X;X;Phospho (STY);X	XXXXXXXXPPPPPPPPPPPPPPPPPPPPPPP	LEIS(1)PDS(0.193)S(0.806)PERAHY(0.553)T(0.235)HS(0.139)DY(0.07)QY(0.004)SQR	LEIS(39.15)PDS(-6.07)S(6.07)PERAHY(3.63)T(-3.63)HS(-5.95)DY(-9.02)QY(-21.84)S(-35.11)QR	8	4	-2.1503	---	---	499	950	155	155	4883	7002	20191112_Haura_KRAS-G12C_TMT-Batch2-Calu1-pY_run1	11590	4883	7002	20191112_Haura_KRAS-G12C_TMT-Batch2-Calu1-pY_run1	11590	4883	7002	20191112_Haura_KRAS-G12C_TMT-Batch2-Calu1-pY_run1	11590	Phosphorylation (STY)	3	LEIpSPDSpSPERAHpYTHSDYQYSQR	4>8>14>n	151>155>161>n	0.806	0.446	LEISPDSSPERAHYTHSDYQYSQR	LEIpSPDSpSPERAHpYTHSDYQYSQR;Q99959;SLRHPLRRLEISPDSSPERAHYTHSDYQYSQ;8;3;4>8>14>n	ph_Q99959:155
sp|P38919|IF4A3_HUMAN	sp|P38919|IF4A3_HUMAN	P38919	__Other	P38919	P38919	sp|P38919|IF4A3_HUMAN Eukaryotic initiation factor 4A-III OS=Homo sapiens OX=9606 GN=EIF4A3 PE=1 SV=4	0.976229	16.135	0.0210293	48.741	32.897	+	1	DEADEMLNKGFKEQIYDVYRYLPPATQVVLI	X;X;X;X;X;X;X;X;X;X;X;X;X;X;X;Phospho (STY);X;X;X;X;X;X;X;X;X;X;X;X;X;X;X	XXXXXXXXXPPPPPPPPPPPXXXXXXXXXXX	GFKEQIY(0.976)DVY(0.024)R	GFKEQIY(16.14)DVY(-16.14)R	7	3	2.1235	---	---	1579	427	202	202	2783	3856	20191113_Haura_KRAS-G12C_TMT-Batch3-H1792-pY_run2	14130	2783	3856	20191113_Haura_KRAS-G12C_TMT-Batch3-H1792-pY_run2	14130	2783	3856	20191113_Haura_KRAS-G12C_TMT-Batch3-H1792-pY_run2	14130	Phosphorylation (STY)	1	GFKEQIpYDVYR	7>>n	202>>n	0.976	0.976	GFKEQIYDVYR	GFKEQIpYDVYR;P38919;DEADEMLNKGFKEQIYDVYRYLPPATQVVLI;7;1;7>>n	ph_P38919:202
sp|P26639|SYTC_HUMAN	sp|P26639|SYTC_HUMAN	P26639	__Other	P26639	P26639	sp|P26639|SYTC_HUMAN Threonine--tRNA ligase, cytoplasmic OS=Homo sapiens OX=9606 GN=TARS PE=1 SV=3	0.993991	22.1858	0.012246	53.683	37.458	---	1	TYWEGKADMETLQRIYGISFPDPKMLKEWEK	X;X;X;X;X;X;X;X;X;X;X;X;X;X;X;Phospho (STY);X;X;X;X;X;X;X;X;X;X;X;X;X;X;X	XXXXXXXXXXXXXXPPPPPPPPPPXXXXXXX	IY(0.994)GIS(0.006)FPDPK	IY(22.19)GIS(-22.19)FPDPK	2	2	0.88838	---	---	1496	389	298	298	4155	5996	20191113_Haura_KRAS-G12C_TMT-Batch3-H1792-pY_run2	17506	4153	5994	20191113_Haura_KRAS-G12C_TMT-Batch3-H1792-pY_run1	17371	4153	5994	20191113_Haura_KRAS-G12C_TMT-Batch3-H1792-pY_run1	17371	Phosphorylation (STY)	1	IpYGISFPDPK	2>>n	298>>n	0.994	0.994	IYGISFPDPK	IpYGISFPDPK;P26639;TYWEGKADMETLQRIYGISFPDPKMLKEWEK;2;1;2>>n	ph_P26639:298
REV__sp|P23468|PTPRD_HUMAN	REV__sp|P23468|PTPRD_HUMAN	---	__REV	REV__P23468	REV__P23468	---	0.970296	14.9587	0.0442094	44.299	7.2867	---	3	---	X;X;X;X;X;X;X;X;X;Phospho (STY);X;X;X;X;Phospho (STY);Phospho (STY);X;X;X;X;X;X;X;X;X;X;X;X;X;X;X	XXXXXXXXPPPPPPPPPPPPXXXXXXXXXXX	DY(0.994)LLT(0.07)KY(0.966)T(0.97)IIGR	DY(22.07)LLT(-14.36)KY(14.36)T(14.96)IIGR	8	3	-1.3629	+	---	610	32	961	961	1661	2248	20191113_Haura_KRAS-G12C_TMT-Batch3-H1792-pY_run1	12099	1661	2248	20191113_Haura_KRAS-G12C_TMT-Batch3-H1792-pY_run1	12099	1661	2248	20191113_Haura_KRAS-G12C_TMT-Batch3-H1792-pY_run1	12099	Phosphorylation (STY)	3	DpYLLTKpYpTIIGR	2,8,7>>n	955,961,960>>n	0.97	0.931	DYLLTKYTIIGR	DpYLLTKpYpTIIGR;---;---;8;3;2,8,7>>n	ph_REV__P23468:961
REV__sp|P23468|PTPRD_HUMAN	REV__sp|P23468|PTPRD_HUMAN	---	__REV	REV__P23468	REV__P23468	---	0.99422	22.0677	0.0442094	44.299	7.2867	+	3	---	X;X;X;X;X;X;X;X;X;X;X;X;X;X;X;Phospho (STY);X;X;X;X;Phospho (STY);Phospho (STY);X;X;X;X;X;X;X;X;X	XXXXXXXXXXXXXXPPPPPPPPPPPPXXXXX	DY(0.994)LLT(0.07)KY(0.966)T(0.97)IIGR	DY(22.07)LLT(-14.36)KY(14.36)T(14.96)IIGR	2	3	-1.3629	+	---	988	32	955	955	1661	2248	20191113_Haura_KRAS-G12C_TMT-Batch3-H1792-pY_run1	12099	1661	2248	20191113_Haura_KRAS-G12C_TMT-Batch3-H1792-pY_run1	12099	1661	2248	20191113_Haura_KRAS-G12C_TMT-Batch3-H1792-pY_run1	12099	Phosphorylation (STY)	3	DpYLLTKpYpTIIGR	2,8,7>>n	955,961,960>>n	0.994	0.931	DYLLTKYTIIGR	DpYLLTKpYpTIIGR;---;---;2;3;2,8,7>>n	ph_REV__P23468:955
REV__sp|P23468|PTPRD_HUMAN	REV__sp|P23468|PTPRD_HUMAN	---	__REV	REV__P23468	REV__P23468	---	0.965935	14.3638	0.0442094	44.299	7.2867	+	3	---	X;X;X;X;X;X;X;X;X;X;Phospho (STY);X;X;X;X;Phospho (STY);Phospho (STY);X;X;X;X;X;X;X;X;X;X;X;X;X;X	XXXXXXXXXPPPPPPPPPPPPXXXXXXXXXX	DY(0.994)LLT(0.07)KY(0.966)T(0.97)IIGR	DY(22.07)LLT(-14.36)KY(14.36)T(14.96)IIGR	7	3	-1.3629	+	---	989	32	960	960	1661	2248	20191113_Haura_KRAS-G12C_TMT-Batch3-H1792-pY_run1	12099	1661	2248	20191113_Haura_KRAS-G12C_TMT-Batch3-H1792-pY_run1	12099	1661	2248	20191113_Haura_KRAS-G12C_TMT-Batch3-H1792-pY_run1	12099	Phosphorylation (STY)	3	DpYLLTKpYpTIIGR	2,8,7>>n	955,961,960>>n	0.966	0.931	DYLLTKYTIIGR	DpYLLTKpYpTIIGR;---;---;7;3;2,8,7>>n	ph_REV__P23468:960
sp|Q99959|PKP2_HUMAN	sp|Q99959|PKP2_HUMAN	Q99959	__Other	Q99959	Q99959	sp|Q99959|PKP2_HUMAN Plakophilin-2 OS=Homo sapiens OX=9606 GN=PKP2 PE=1 SV=2	0.969113	15.2899	2.26427e-10	100.68	91.247	+	1;2;3	RRLEISPDSSPERAHYTHSDYQYSQRSQAGH	X;X;X;X;X;Phospho (STY);X;X;X;Phospho (STY);X;X;X;X;X;Phospho (STY);X;X;X;X;Phospho (STY);X;X;X;X;X;X;X;X;X;X	XXPPPPPPPPPPPPPPPPPPPPPPPPXXXXX	AHY(0.969)T(0.029)HS(0.002)DYQYSQR	AHY(15.29)T(-15.29)HS(-27.84)DY(-33.14)QY(-38.31)S(-49.27)QR	3	3	-1.4513	---	---	2458	950	161	161	374	567	20191112_Haura_KRAS-G12C_TMT-Batch2-Calu1-pY_run1	6195	4883	7002	20191112_Haura_KRAS-G12C_TMT-Batch2-Calu1-pY_run1	11590	4883	7002	20191112_Haura_KRAS-G12C_TMT-Batch2-Calu1-pY_run1	11590	Phosphorylation (STY)	1	AHpYTHSDYQYSQR	3>>n	161>>n	0.969	0.969	AHYTHSDYQYSQR	AHpYTHSDYQYSQR;Q99959;RRLEISPDSSPERAHYTHSDYQYSQRSQAGH;3;1;3>>n	ph_Q99959:161
sp|Q86V48|LUZP1_HUMAN	sp|Q86V48|LUZP1_HUMAN	Q86V48	__Other	Q86V48	Q86V48	sp|Q86V48|LUZP1_HUMAN Leucine zipper protein 1 OS=Homo sapiens OX=9606 GN=LUZP1 PE=1 SV=2	0.981099	17.2675	0.000352746	98.942	77.069	+	1	PTRIGKNVESTNSNAYTQRSSTDFSELEQPR	X;X;X;X;X;X;X;X;X;X;X;X;X;X;X;Phospho (STY);X;X;X;X;X;X;X;X;X;X;X;X;X;X;X	XXXXXXPPPPPPPPPPPPPXXXXXXXXXXXX	NVESTNSNAY(0.981)T(0.018)QR	NVES(-69.76)T(-62.05)NS(-32.97)NAY(17.27)T(-17.27)QR	10	3	0.1801	---	---	2141	772	952	952	6067	8642	20191112_Haura_KRAS-G12C_TMT-Batch2-Calu1-pY_run1	7145	6068	8643	20191112_Haura_KRAS-G12C_TMT-Batch2-Calu1-pY_run2	7208	6068	8643	20191112_Haura_KRAS-G12C_TMT-Batch2-Calu1-pY_run2	7208	Phosphorylation (STY)	1	NVESTNSNApYTQR	10>>n	952>>n	0.981	0.981	NVESTNSNAYTQR	NVESTNSNApYTQR;Q86V48;PTRIGKNVESTNSNAYTQRSSTDFSELEQPR;10;1;10>>n	ph_Q86V48:952
sp|P83881|RL36A_HUMAN	sp|P83881|RL36A_HUMAN	P83881	__Other	P83881	P83881	sp|P83881|RL36A_HUMAN 60S ribosomal protein L36a OS=Homo sapiens OX=9606 GN=RPL36A PE=1 SV=2	0.990044	19.9755	0.00606003	63.283	34.885	+	1	QPHKVTQYKKGKDSLYAQGKRRYDRKQSGYG	X;X;X;X;X;X;X;X;X;X;X;X;X;X;X;Phospho (STY);X;X;X;X;X;X;X;X;X;X;X;X;X;X;X	XXXXXXXXXXPPPPPPPPPPXXXXXXXXXXX	GKDS(0.01)LY(0.99)AQGK	GKDS(-19.98)LY(19.98)AQGK	6	3	3.378	---	---	1750	542	34	34	2923	4046	20191113_Haura_KRAS-G12C_TMT-Batch3-H1792-pY_run2	9663	2923	4046	20191113_Haura_KRAS-G12C_TMT-Batch3-H1792-pY_run2	9663	2923	4046	20191113_Haura_KRAS-G12C_TMT-Batch3-H1792-pY_run2	9663	Phosphorylation (STY)	1	GKDSLpYAQGK	6>>n	34>>n	0.99	0.99	GKDSLYAQGK	GKDSLpYAQGK;P83881;QPHKVTQYKKGKDSLYAQGKRRYDRKQSGYG;6;1;6>>n	ph_P83881:34
sp|P35579|MYH9_HUMAN	sp|P35579|MYH9_HUMAN	P35579	__Other	P35579	P35579	sp|P35579|MYH9_HUMAN Myosin-9 OS=Homo sapiens OX=9606 GN=MYH9 PE=1 SV=4	1	119.065	8.14093e-25	225.66	190.22	+	1	ACVLMIKALELDSNLYRIGQSKVFFRAGVLA	X;X;X;X;X;X;X;X;X;X;X;X;X;X;X;Phospho (STY);X;X;X;X;X;X;X;X;X;X;X;X;X;X;X	XXXXXXXPPPPPPPPPPPPPPPXXXXXXXXX	ALELDSNLY(1)R	ALELDS(-119.07)NLY(119.07)R	9	2	0.43322	---	---	1562	420	754	754	459	669	20191112_Haura_KRAS-G12C_TMT-Batch2-Calu1-pY_run2	14629	459	669	20191112_Haura_KRAS-G12C_TMT-Batch2-Calu1-pY_run2	14629	459	669	20191112_Haura_KRAS-G12C_TMT-Batch2-Calu1-pY_run2	14629	Phosphorylation (STY)	1	ALELDSNLpYR	9>>n	754>>n	1	1	ALELDSNLYR	ALELDSNLpYR;P35579;ACVLMIKALELDSNLYRIGQSKVFFRAGVLA;9;1;9>>n	ph_P35579:754
sp|Q99880|H2B1L_HUMAN	sp|Q99880|H2B1L_HUMAN	O60814;P57053;P58876;P62807;Q5QNW6;Q93079;Q99877;Q99879;Q99880	__Other	Q99880	Q99880	sp|Q99880|H2B1L_HUMAN Histone H2B type 1-L OS=Homo sapiens OX=9606 GN=HIST1H2BL PE=1 SV=3;sp|Q99879|H2B1M_HUMAN Histone H2B type 1-M OS=Homo sapiens OX=9606 GN=HIST1H2BM PE=1 SV=3;sp|Q99877|H2B1N_HUMAN Histone H2B type 1-N OS=Homo sapiens OX=9606 GN=HIST1H	0.999962	44.185	0.000318594	107.66	81.928	+	1	KKRKRSRKESYSVYVYKVLKQVHPDTGISSK	X;X;X;X;X;X;X;X;X;X;X;X;X;X;X;Phospho (STY);X;X;X;X;X;X;X;X;X;X;X;X;X;X;X	XXXXXXXXPPPPPPPPPXXXXXXXXXXXXXX	ESYSVYVY(1)K	ES(-102.3)Y(-90.28)S(-76.29)VY(-44.18)VY(44.18)K	8	2	1.3392	---	---	1166	191	43	43	2224	2990	20191107_Haura_KRAS-G12C_TMT-Batch1-H358-pY_run1	13980	2224	2990	20191107_Haura_KRAS-G12C_TMT-Batch1-H358-pY_run1	13980	2224	2990	20191107_Haura_KRAS-G12C_TMT-Batch1-H358-pY_run1	13980	Phosphorylation (STY)	1	ESYSVYVpYK	8>>n	43>>n	1	1	ESYSVYVYK	ESYSVYVpYK;O60814;P57053;P58876;P62807;Q5QNW6;Q93079;Q99877;Q99879;Q99880;KKRKRSRKESYSVYVYKVLKQVHPDTGISSK;8;1;8>>n	ph_Q99880:43
sp|Q10589|BST2_HUMAN	sp|Q10589|BST2_HUMAN	Q10589	__Other	Q10589	Q10589	sp|Q10589|BST2_HUMAN Bone marrow stromal antigen 2 OS=Homo sapiens OX=9606 GN=BST2 PE=1 SV=1	0.996438	24.4697	3.23292e-10	201.07	167.07	+	1	________MASTSYDYCRVPMEDGDKRCKLL	X;X;X;X;X;X;X;X;X;X;X;X;X;X;X;Phospho (STY);X;X;X;X;X;X;X;X;X;X;X;X;X;X;X	XXXXXXXXXPPPPPPPPPXXXXXXXXXXXXX	ASTSY(0.004)DY(0.996)CR	AS(-92.64)T(-70.66)S(-59.08)Y(-24.47)DY(24.47)CR	7	2	-0.99841	---	---	1858	591	8	8	766	1068	20191107_Haura_KRAS-G12C_TMT-Batch1-H358-pY_run1	8107	766	1068	20191107_Haura_KRAS-G12C_TMT-Batch1-H358-pY_run1	8107	766	1068	20191107_Haura_KRAS-G12C_TMT-Batch1-H358-pY_run1	8107	Phosphorylation (STY)	1	ASTSYDpYCR	7>>n	8>>n	0.996	0.996	ASTSYDYCR	ASTSYDpYCR;Q10589;________MASTSYDYCRVPMEDGDKRCKLL;7;1;7>>n	ph_Q10589:8
sp|Q07157|ZO1_HUMAN	sp|Q07157|ZO1_HUMAN	Q07157	__Other	Q07157	Q07157	sp|Q07157|ZO1_HUMAN Tight junction protein ZO-1 OS=Homo sapiens OX=9606 GN=TJP1 PE=1 SV=3	0.964416	19.245	2.78217e-06	94.057	76.463	---	1	VEKQASRDLEQPTYRYESSSYTDQFSRNYEH	X;X;X;X;X;X;X;X;X;X;X;X;X;X;X;Phospho (STY);X;X;X;X;X;X;X;X;X;X;X;X;X;X;X	XXXXXXXPPPPPPPPPPPPPPPPPPPPXXXX	Y(0.964)ES(0.011)S(0.011)S(0.011)Y(0.001)T(0.001)DQFSR	Y(19.24)ES(-19.24)S(-19.24)S(-19.24)Y(-32.64)T(-31.85)DQFS(-56.28)R	1	2	0.10208	---	---	1820	574	1061	1061	9885	14025	20191107_Haura_KRAS-G12C_TMT-Batch1-H358-pY_run2	11470	1329	1781	20191113_Haura_KRAS-G12C_TMT-Batch3-H1792-pY_run2	12820	1329	1781	20191113_Haura_KRAS-G12C_TMT-Batch3-H1792-pY_run2	12820	Phosphorylation (STY)	1	pYESSSYTDQFSR	1>>n	1061>>n	0.964	0.964	YESSSYTDQFSR	pYESSSYTDQFSR;Q07157;VEKQASRDLEQPTYRYESSSYTDQFSRNYEH;1;1;1>>n	ph_Q07157:1061
sp|Q9Y2H5|PKHA6_HUMAN	sp|Q9Y2H5|PKHA6_HUMAN	Q9Y2H5	__Other	Q9Y2H5	Q9Y2H5	sp|Q9Y2H5|PKHA6_HUMAN Pleckstrin homology domain-containing family A member 6 OS=Homo sapiens OX=9606 GN=PLEKHA6 PE=1 SV=4	1	81.7753	0.00504282	111.12	79.694	+	1;2	VPRSPSQGSYSRARIYSPVRSPSARFERLPP	X;X;X;X;X;X;X;X;X;X;X;X;X;X;X;Phospho (STY);Phospho (STY);X;X;X;Phospho (STY);X;Phospho (STY);X;X;X;X;X;X;X;X	XXXXXXXXXXXXPPPPPPPPPPPPPXXXXXX	IY(1)S(1)PVRSPSAR	IY(81.78)S(76.08)PVRS(-76.08)PS(-80.63)AR	2	3	-0.2531	---	---	2721	1116	471	471	4213	6134	20191112_Haura_KRAS-G12C_TMT-Batch2-Calu1-pY_run2	10017	4213	6134	20191112_Haura_KRAS-G12C_TMT-Batch2-Calu1-pY_run2	10017	4214	6135	20191112_Haura_KRAS-G12C_TMT-Batch2-Calu1-pY_run2	10811	Phosphorylation (STY)	2	IpYpSPVRSPSAR	2,3>>n	471,472>>n	1	1	IYSPVRSPSAR	IpYpSPVRSPSAR;Q9Y2H5;VPRSPSQGSYSRARIYSPVRSPSARFERLPP;2;2;2,3>>n	ph_Q9Y2H5:471
sp|Q96RT1|ERBIN_HUMAN	sp|Q96RT1|ERBIN_HUMAN	Q96RT1	__Other	Q96RT1	Q96RT1	sp|Q96RT1|ERBIN_HUMAN Erbin OS=Homo sapiens OX=9606 GN=ERBIN PE=1 SV=2	0.999781	36.5875	4.127e-123	320.68	268.92	+	1;2	INEIPERTMSVSDFNYSRTSPSKRPNARVGS	X;X;X;X;X;X;X;X;Oxidation (M);Phospho (STY);X;X;X;X;X;Phospho (STY);X;X;X;X;X;X;X;X;X;X;X;X;X;X;X	XXXXXXXPPPPPPPPPPPXXXXXXXXXXXXX	TMSVSDFNY(1)SR	T(-211.69)MS(-165.93)VS(-117.11)DFNY(36.59)S(-36.59)R	9	2	-0.31505	---	---	2406	932	1164	1164	8507	11986	20191107_Haura_KRAS-G12C_TMT-Batch1-H358-pY_run2	12863	8510	11992	20191112_Haura_KRAS-G12C_TMT-Batch2-Calu1-pY_run2	12973	8510	11992	20191112_Haura_KRAS-G12C_TMT-Batch2-Calu1-pY_run2	12973	Phosphorylation (STY)	1	TMSVSDFNpYSR	9>>n	1164>>n	1	1	TMSVSDFNYSR	TMSVSDFNpYSR;Q96RT1;INEIPERTMSVSDFNYSRTSPSKRPNARVGS;9;1;9>>n	ph_Q96RT1:1164
sp|Q16539|MK14_HUMAN	sp|Q16539|MK14_HUMAN	Q16539	__Other	Q16539	Q16539	sp|Q16539|MK14_HUMAN Mitogen-activated protein kinase 14 OS=Homo sapiens OX=9606 GN=MAPK14 PE=1 SV=3	1	113.427	1.22739e-81	278.93	259.69	---	1;2	KILDFGLARHTDDEMTGYVATRWYRAPEIML	X;X;X;X;X;X;X;X;X;X;X;X;X;X;Oxidation (M);Phospho (STY);X;Phospho (STY);X;X;X;X;X;X;X;X;X;X;X;X;X	XXXXXXXXXPPPPPPPPPPPPPXXXXXXXXX	HTDDEMT(1)GY(1)VATR	HT(-138.93)DDEMT(113.43)GY(94.42)VAT(-94.42)R	7	2	-2.0769	---	---	804	676	180	180	3664	5099	20191112_Haura_KRAS-G12C_TMT-Batch2-Calu1-pY_run1	9135	3664	5099	20191112_Haura_KRAS-G12C_TMT-Batch2-Calu1-pY_run1	9135	3664	5099	20191112_Haura_KRAS-G12C_TMT-Batch2-Calu1-pY_run1	9135	Phosphorylation (STY)	2	HTDDEMpTGpYVATR	7,9>>n	180,182>>n	1	1	HTDDEMTGYVATR	HTDDEMpTGpYVATR;Q16539;KILDFGLARHTDDEMTGYVATRWYRAPEIML;7;2;7,9>>n	ph_Q16539:180
sp|Q04837|SSBP_HUMAN	sp|Q04837|SSBP_HUMAN	Q04837	__Other	Q04837	Q04837	sp|Q04837|SSBP_HUMAN Single-stranded DNA-binding protein, mitochondrial OS=Homo sapiens OX=9606 GN=SSBP1 PE=1 SV=1	0.999936	41.9268	0.000131447	126.52	59.84	+	1	WHRISVFRPGLRDVAYQYVKKGSRIYLEGKI	X;X;X;X;X;X;X;X;X;X;X;X;X;X;X;Phospho (STY);X;X;X;X;X;X;X;X;X;X;X;X;X;X;X	XXXXXXXXXXXXPPPPPPPPXXXXXXXXXXX	DVAY(1)QYVK	DVAY(41.93)QY(-41.93)VK	4	2	3.4656	---	---	1792	565	99	99	1606	2185	20191113_Haura_KRAS-G12C_TMT-Batch3-H1792-pY_run2	12710	1604	2183	20191113_Haura_KRAS-G12C_TMT-Batch3-H1792-pY_run1	12636	1606	2185	20191113_Haura_KRAS-G12C_TMT-Batch3-H1792-pY_run2	12710	Phosphorylation (STY)	1	DVApYQYVK	4>>n	99>>n	1	1	DVAYQYVK	DVApYQYVK;Q04837;WHRISVFRPGLRDVAYQYVKKGSRIYLEGKI;4;1;4>>n	ph_Q04837:99
REV__sp|A0A1B0GX49|TVB64_HUMAN	REV__sp|A0A1B0GX49|TVB64_HUMAN	---	__REV	REV__A0A1B0GX49	REV__A0A1B0GX49	---	0.5	0	0.0397919	41.652	8.1019	+	1	---	X;X;X;X;X;X;X;X;X;X;X;X;X;X;X;Phospho (STY);X;X;X;X;X;X;X;X;X;X;X;X;X;X;X	XXXXXXXXXXXXXXPPPPPPPPXXXXXXXXX	QY(0.5)WY(0.5)MANR	QY(0)WY(0)MANR	2	3	-4.3828	+	---	977	11	61	61	6665	9418	20191113_Haura_KRAS-G12C_TMT-Batch3-H1792-pY_run2	6819	6665	9418	20191113_Haura_KRAS-G12C_TMT-Batch3-H1792-pY_run2	6819	6665	9418	20191113_Haura_KRAS-G12C_TMT-Batch3-H1792-pY_run2	6819	Phosphorylation (STY)	1	QpYWYMANR	2,n	61,n	0.5	0.5	QYWYMANR	QpYWYMANR;---;---;2;1;2,n	ph_REV__A0A1B0GX49:61
REV__sp|A0A1B0GX49|TVB64_HUMAN	REV__sp|A0A1B0GX49|TVB64_HUMAN	---	__REV	REV__A0A1B0GX49	REV__A0A1B0GX49	---	0.5	0	0.0397919	41.652	8.1019	+	1	---	X;X;X;X;X;X;X;X;X;X;X;X;X;X;X;X;X;X;X;X;X;X;X;X;X;X;X;X;X;X;X	XXXXXXXXXXXXXXXXXXXXXXXXXXXXXXX	QY(0.5)WY(0.5)MANR	QY(0)WY(0)MANR	4	3	-4.3828	+	---	978	11	63	63	6665	9418	20191113_Haura_KRAS-G12C_TMT-Batch3-H1792-pY_run2	6819	6665	9418	20191113_Haura_KRAS-G12C_TMT-Batch3-H1792-pY_run2	6819	6665	9418	20191113_Haura_KRAS-G12C_TMT-Batch3-H1792-pY_run2	6819	Phosphorylation (STY)	1	QYWpYMANR	4,n	63,n	0.5	0.5	QYWYMANR	QYWpYMANR;---;---;4;1;4,n	ph_REV__A0A1B0GX49:63
sp|Q99614|TTC1_HUMAN	sp|Q99614|TTC1_HUMAN	Q99614	__Other	Q99614	Q99614	sp|Q99614|TTC1_HUMAN Tetratricopeptide repeat protein 1 OS=Homo sapiens OX=9606 GN=TTC1 PE=1 SV=1	0.851244	8.10247	1.05037e-12	148.26	123.67	+	1	STENFQIKQDSSTGSYSINFVQNPNNNR___	X;X;X;X;X;X;X;X;X;X;X;X;X;X;X;Phospho (STY);X;X;X;X;X;X;X;X;X;X;X;X;X;X;X	XXXXXXXXPPPPPPPPPPPPPPPPPPPPXXX	QDSS(0.001)T(0.003)GS(0.132)Y(0.851)S(0.013)INFVQNPNNNR	QDS(-39.77)S(-31.97)T(-24.08)GS(-8.1)Y(8.1)S(-18.15)INFVQNPNNNR	8	3	-1.5403	---	---	2437	940	280	280	6265	8902	20191112_Haura_KRAS-G12C_TMT-Batch2-Calu1-pY_run2	12773	6265	8902	20191112_Haura_KRAS-G12C_TMT-Batch2-Calu1-pY_run2	12773	6265	8902	20191112_Haura_KRAS-G12C_TMT-Batch2-Calu1-pY_run2	12773	Phosphorylation (STY)	1	QDSSTGSpYSINFVQNPNNNR	8>>n	280>>n	0.851	0.851	QDSSTGSYSINFVQNPNNNR	QDSSTGSpYSINFVQNPNNNR;Q99614;STENFQIKQDSSTGSYSINFVQNPNNNR___;8;1;8>>n	ph_Q99614:280
sp|Q16625|OCLN_HUMAN	sp|Q16625|OCLN_HUMAN	Q16625	__Other	Q16625	Q16625	sp|Q16625|OCLN_HUMAN Occludin OS=Homo sapiens OX=9606 GN=OCLN PE=1 SV=1	0.59942	2.49683	4.45192e-11	188.96	154.07	---	1	LPLTSPVDDFRQPRYSSGGNFETPSKRAPAK	X;X;X;X;X;X;X;X;X;X;X;X;X;X;X;Phospho (STY);X;X;X;X;X;X;X;X;X;X;X;X;X;X;X	XXXXXXXXXXXXXXPPPPPPPPPPPPPXXXX	Y(0.337)S(0.599)S(0.063)GGNFETPSK	Y(-2.5)S(2.5)S(-9.77)GGNFET(-153.07)PS(-180.17)K	2	3	4.3452	---	---	327	677	369	369	10368	14644	20191112_Haura_KRAS-G12C_TMT-Batch2-Calu1-pY_run2	11156	10368	14644	20191112_Haura_KRAS-G12C_TMT-Batch2-Calu1-pY_run2	11156	10368	14644	20191112_Haura_KRAS-G12C_TMT-Batch2-Calu1-pY_run2	11156	Phosphorylation (STY)	1	YpSSGGNFETPSK	2>n	369>n	0.599	0.599	YSSGGNFETPSK	YpSSGGNFETPSK;Q16625;LPLTSPVDDFRQPRYSSGGNFETPSKRAPAK;2;1;2>n	ph_Q16625:369
sp|O43150|ASAP2_HUMAN	sp|O43150|ASAP2_HUMAN	O43150	__Other	O43150	O43150	sp|O43150|ASAP2_HUMAN Arf-GAP with SH3 domain, ANK repeat and PH domain-containing protein 2 OS=Homo sapiens OX=9606 GN=ASAP2 PE=1 SV=3	0.870231	8.28254	1.86708e-41	208.65	186.53	+	1	LQPSPNRREDRPISFYQLGSNQLQSNAVSLA	X;X;X;X;X;X;X;X;X;X;X;X;X;X;X;Phospho (STY);X;X;X;X;X;X;X;X;X;X;X;X;X;X;X	XXXXXXXXPPPPPPPPPPPPPPPPPPPPPPP	EDRPIS(0.129)FY(0.87)QLGS(0.001)NQLQSNAVSLAR	EDRPIS(-8.28)FY(8.28)QLGS(-32.12)NQLQS(-117.77)NAVS(-146.18)LAR	8	3	-1.1925	---	---	1104	157	724	724	1776	2399	20191112_Haura_KRAS-G12C_TMT-Batch2-Calu1-pY_run2	15729	1775	2398	20191112_Haura_KRAS-G12C_TMT-Batch2-Calu1-pY_run1	15636	1775	2398	20191112_Haura_KRAS-G12C_TMT-Batch2-Calu1-pY_run1	15636	Phosphorylation (STY)	1	EDRPISFpYQLGSNQLQSNAVSLAR	8>>n	724>>n	0.87	0.87	EDRPISFYQLGSNQLQSNAVSLAR	EDRPISFpYQLGSNQLQSNAVSLAR;O43150;LQPSPNRREDRPISFYQLGSNQLQSNAVSLA;8;1;8>>n	ph_O43150:724
sp|P55287|CAD11_HUMAN	sp|P55287|CAD11_HUMAN	P55287	__Other	P55287	P55287	sp|P55287|CAD11_HUMAN Cadherin-11 OS=Homo sapiens OX=9606 GN=CDH11 PE=1 SV=2	0.5	0	0.00464157	57.802	45.034	+	1	INGFIPRKDIKPEYQYMPRPGLRPAPNSVDV	X;X;X;X;X;X;X;X;X;X;X;X;X;X;X;X;X;X;X;X;X;X;X;X;X;X;X;X;X;X;X	XXXXXXXXXXXXXXXXXXXXXXXXXXXXXXX	KDIKPEY(0.5)QY(0.5)MPR	KDIKPEY(0)QY(0)MPR	9	3	4.3496	---	---	1678	493	702	702	4274	6205	20191107_Haura_KRAS-G12C_TMT-Batch1-H358-pY_run1	11470	4274	6205	20191107_Haura_KRAS-G12C_TMT-Batch1-H358-pY_run1	11470	4274	6205	20191107_Haura_KRAS-G12C_TMT-Batch1-H358-pY_run1	11470	Phosphorylation (STY)	1	KDIKPEYQpYMPR	9,n	702,n	0.5	0.5	KDIKPEYQYMPR	KDIKPEYQpYMPR;P55287;INGFIPRKDIKPEYQYMPRPGLRPAPNSVDV;9;1;9,n	ph_P55287:702
REV__sp|Q8WXH0|SYNE2_HUMAN	REV__sp|Q8WXH0|SYNE2_HUMAN	---	__REV	REV__Q8WXH0	REV__Q8WXH0	---	0.944587	15.3602	0.038998	46.663	7.845	+	1	---	X;X;X;X;X;X;X;X;X;X;X;X;X;X;X;Phospho (STY);X;X;X;X;X;X;X;X;X;X;X;X;X;X;X	XXXXXXXXXXXXPPPPPPPXXXXXXXXXXXX	S(0.027)T(0.027)QY(0.945)LSR	S(-15.36)T(-15.36)QY(15.36)LS(-33.46)R	4	2	-0.94773	+	---	1013	82	1151	1151	7912	11181	20191107_Haura_KRAS-G12C_TMT-Batch1-H358-pY_run1	8322	7912	11181	20191107_Haura_KRAS-G12C_TMT-Batch1-H358-pY_run1	8322	7912	11181	20191107_Haura_KRAS-G12C_TMT-Batch1-H358-pY_run1	8322	Phosphorylation (STY)	1	STQpYLSR	4>>n	1151>>n	0.945	0.945	STQYLSR	STQpYLSR;---;---;4;1;4>>n	ph_REV__Q8WXH0:1151
sp|P07814|SYEP_HUMAN	sp|P07814|SYEP_HUMAN	P07814	__Other	P07814	P07814	sp|P07814|SYEP_HUMAN Bifunctional glutamate/proline--tRNA ligase OS=Homo sapiens OX=9606 GN=EPRS PE=1 SV=5	0.586346	2.16703	0.000139592	84.874	67.655	---	1	QRRGFFICDQPYEPVSPYSCKEAPCVLIYIP	X;X;X;X;X;X;X;X;X;X;X;X;X;X;X;Phospho (STY);X;X;X;X;X;X;X;X;X;X;X;X;X;X;X	XXXPPPPPPPPPPPPPPPPPPXXXXXXXXXX	GFFICDQPYEPVS(0.586)PY(0.356)S(0.057)CK	GFFICDQPY(-34.82)EPVS(2.17)PY(-2.17)S(-10.09)CK	13	3	0.94141	---	---	131	274	688	688	2776	3848	20191113_Haura_KRAS-G12C_TMT-Batch3-H1792-pY_run1	17789	2776	3848	20191113_Haura_KRAS-G12C_TMT-Batch3-H1792-pY_run1	17789	2776	3848	20191113_Haura_KRAS-G12C_TMT-Batch3-H1792-pY_run1	17789	Phosphorylation (STY)	1	GFFICDQPYEPVpSPYSCK	13>n	688>n	0.586	0.586	GFFICDQPYEPVSPYSCK	GFFICDQPYEPVpSPYSCK;P07814;QRRGFFICDQPYEPVSPYSCKEAPCVLIYIP;13;1;13>n	ph_P07814:688
sp|Q15768|EFNB3_HUMAN	sp|Q15768|EFNB3_HUMAN	Q15768	__Other	Q15768	Q15768	sp|Q15768|EFNB3_HUMAN Ephrin-B3 OS=Homo sapiens OX=9606 GN=EFNB3 PE=1 SV=1	1	61.0971	4.71831e-05	87.566	68.242	+	1	ALRGGGAADPPFCPHYEKVSGDYGHPVYIVQ	X;X;X;X;X;X;X;X;X;X;X;X;X;X;X;Phospho (STY);X;X;X;X;X;X;X;X;X;X;X;X;X;X;X	XXXPPPPPPPPPPPPPPPXXXXXXXXXXXXX	GGGAADPPFCPHY(1)EK	GGGAADPPFCPHY(61.1)EK	13	3	0.18113	---	---	2000	673	311	311	2794	3867	20191107_Haura_KRAS-G12C_TMT-Batch1-H358-pY_run2	10958	2793	3866	20191107_Haura_KRAS-G12C_TMT-Batch1-H358-pY_run1	10995	2793	3866	20191107_Haura_KRAS-G12C_TMT-Batch1-H358-pY_run1	10995	Phosphorylation (STY)	1	GGGAADPPFCPHpYEK	13,x	311,x	1	1	GGGAADPPFCPHYEK	GGGAADPPFCPHpYEK;Q15768;ALRGGGAADPPFCPHYEKVSGDYGHPVYIVQ;13;1;13,x	ph_Q15768:311
sp|P54792|DVLP1_HUMAN	sp|P54792|DVLP1_HUMAN	O14640;P54792	__Other	P54792	P54792	sp|P54792|DVLP1_HUMAN Putative segment polarity protein dishevelled homolog DVL1P1 OS=Homo sapiens OX=9606 GN=DVL1P1 PE=5 SV=1;sp|O14640|DVL1_HUMAN Segment polarity protein dishevelled homolog DVL-1 OS=Homo sapiens OX=9606 GN=DVL1 PE=1 SV=2	0.537097	0.655001	3.8348e-05	110.54	43.48	+	1	ISLTVAKCWDPTPRSYFTVPRPDPVRPIDPA	X;X;X;X;X;X;X;X;X;X;X;X;X;X;X;Phospho (STY);X;X;X;X;X;X;X;X;X;X;X;X;X;X;X	XXXXXXXXXXXXXXPPPPPPPXXXXXXXXXX	S(0.462)Y(0.537)FT(0.001)VPR	S(-0.66)Y(0.66)FT(-27.31)VPR	2	2	0.9033	---	---	1071	136	346	346	8096	11440	20191107_Haura_KRAS-G12C_TMT-Batch1-H358-pY_run1	12880	8096	11440	20191107_Haura_KRAS-G12C_TMT-Batch1-H358-pY_run1	12880	8096	11440	20191107_Haura_KRAS-G12C_TMT-Batch1-H358-pY_run1	12880	Phosphorylation (STY)	1	SpYFTVPR	2>n	346>n	0.537	0.537	SYFTVPR	SpYFTVPR;O14640;P54792;ISLTVAKCWDPTPRSYFTVPRPDPVRPIDPA;2;1;2>n	ph_P54792:346
sp|Q7Z4W1|DCXR_HUMAN	sp|Q7Z4W1|DCXR_HUMAN	Q7Z4W1	__Other	Q7Z4W1	Q7Z4W1	sp|Q7Z4W1|DCXR_HUMAN L-xylulose reductase OS=Homo sapiens OX=9606 GN=DCXR PE=1 SV=2	0.999819	38.4116	0.00107291	100.55	64.268	+	1	VSSQCSQRAVTNHSVYCSTKGALDMLTKVMA	X;X;X;X;X;X;X;X;X;X;X;X;X;X;X;Phospho (STY);X;X;X;X;X;X;X;X;X;X;X;X;X;X;X	XXXXXXXXPPPPPPPPPPPPXXXXXXXXXXX	AVTNHSVY(1)CSTK	AVT(-66.76)NHS(-47.38)VY(38.41)CS(-38.41)T(-47.3)K	8	3	0.34395	---	---	2120	758	149	149	901	1279	20191107_Haura_KRAS-G12C_TMT-Batch1-H358-pY_run1	8392	901	1279	20191107_Haura_KRAS-G12C_TMT-Batch1-H358-pY_run1	8392	901	1279	20191107_Haura_KRAS-G12C_TMT-Batch1-H358-pY_run1	8392	Phosphorylation (STY)	1	AVTNHSVpYCSTK	8>>n	149>>n	1	1	AVTNHSVYCSTK	AVTNHSVpYCSTK;Q7Z4W1;VSSQCSQRAVTNHSVYCSTKGALDMLTKVMA;8;1;8>>n	ph_Q7Z4W1:149
[truncated: 1,866 more rows]
[truncated: 116 more columns]

## Sheet: pY Common
Supplemental Table S2 : List of phosphopeptides after (pY) enrichment in ARS-1620 treated cells that were differentially affected across all 3 cell lines
