# Supplementary material for: Cell Type–specific Adaptive Signaling Responses to KRASG12C Inhibition
Source: Oxford University Press journal article supplement (doi:10.1158/1078-0432.ccr-20-3872), 2021-02-22
Supplement: 10780432ccr203872-sup-252918_4_supp_6912872_qzcb39.xlsx [file 10780432ccr203872-sup-252918_4_supp_6912872_qzcb39.xlsx]

## Sheet: protein_expression
																											Supplementary Table S5. The complete list of identified proteins after TMT-based quantitative proteomic analysis in KRASG12C mutant lung cancer cell lines (n=8) with mean-centered log abundance values.
																																				Cell Line		Empty	Pool	Calu1	H1373	H1792	H2122	H23	H358	HCC44	Hop62	Log2 ratio vs. mean for each phosphosite
																																				TMT Channel		130N	131N	127C	129N	126	128N	127N	128C	129C	130C
RowIdentifier	OrigIdentifier	Protein IDs	RefType	Majority protein IDs	Peptide counts (all)	Peptide counts (razor+unique)	Peptide counts (unique)	Number of proteins	Peptides	Razor + unique peptides	Unique peptides	Sequence coverage [%]	Unique + razor sequence coverage [%]	Unique sequence coverage [%]	Mol. weight [kDa]	Sequence length	Sequence lengths	Q-value	Score	Only identified by site	Reverse	Potential contaminant	id	Has_Contaminant_Flag	All_Reverse_Flag	Cow_Contaminant_Flag	Accession_Protein	Fasta headers	GeneID	NumGenes	WarningLevel	Symbol	Alias	Type	Location	Description	excel_padding	TMT01_TMT-130N	TMT01_TMT-131	TMT01_TMT-127C	TMT01_TMT-129N	TMT01_TMT-126	TMT01_TMT-128N	TMT01_TMT-127N	TMT01_TMT-128C	TMT01_TMT-129C	TMT01_TMT-130C	Calu1	H1373
sp|P04222|1C03_HUMAN	sp|P04222|1C03_HUMAN	sp|P04222|1C03_HUMAN	__Other	sp|P04222|1C03_HUMAN	15	1	0	1	15	1	0	48.4	5.5	0	40.86	366	366	0	32.515				1315	0	0	0	---	sp|P04222|1C03_HUMAN HLA class I histocompatibility antigen, Cw-3 alpha chain OS=Homo sapiens OX=9606 GN=HLA-C PE=1 SV=2	---	0	1	---	---	---	---	---	.	12.1522	13.592	14.9303	14.4707	10.8977	10.2023	10.6979	14.2152	11.4951	14.2957	2.27974	1.82009
sp|P01920|DQB1_HUMAN;sp|P05538|DQB2_HUMAN;sp|Q30154|DRB5_HUMAN	sp|Q30154|DRB5_HUMAN;sp|P01920|DQB1_HUMAN;sp|P05538|DQB2_HUMAN	sp|P01920|DQB1_HUMAN;sp|P05538|DQB2_HUMAN;sp|Q30154|DRB5_HUMAN	__Other	sp|P01920|DQB1_HUMAN;sp|P05538|DQB2_HUMAN;sp|Q30154|DRB5_HUMAN	2;1;1	1;1;1	1;1;1	3	2	1	1	6.8	3.4	3.4	30.056	266	266;261;268	0.0033088	1.6964				3940	0	0	0	DQB1_HUMAN P01920 DQB2_HUMAN P05538 DRB5_HUMAN Q30154	sp|Q30154|DRB5_HUMAN HLA class II histocompatibility antigen, DR beta 5 chain OS=Homo sapiens OX=9606 GN=HLA-DRB5 PE=1 SV=1;sp|P01920|DQB1_HUMAN HLA class II histocompatibility antigen, DQ beta 1 chain OS=Homo sapiens OX=9606 GN=HLA-DQB1 PE=1 SV=2;sp|P0553	3119 3120 3127	3	2	HLA-DQB1 HLA-DQB2 HLA-DRB5	CELIAC1 HLA-DQB IDDM1 DQB2 HLA-DQB1 HLA-DXB	protein-coding	6p21.32	major histocompatibility complex, class II, DQ beta 1 ||| HLA class II histocompatibility antigen, DQ beta 1 chain ||| major histocompatibility complex, class II, DQ beta 2 ||| HLA class II histocompatibility antigen, DQ beta 2 chain ||| major histocompatibility complex, class II, DR beta 5 ||| HLA class II histocompatibility antigen, DR beta 5 chain	.	12.9762	10.7195	10.7502	13.4308	8.0536	9.01671	9.69749	10.9106	8.9705	7.27551	0.986984	3.66764
sp|Q86YA3|ZGRF1_HUMAN	sp|Q86YA3|ZGRF1_HUMAN	sp|Q86YA3|ZGRF1_HUMAN	__Other	sp|Q86YA3|ZGRF1_HUMAN	1	1	1	1	1	1	1	0.4	0.4	0.4	236.6	2104	2104	0.0087112	1.063				4897	0	0	0	ZGRF1_HUMAN Q86YA3	sp|Q86YA3|ZGRF1_HUMAN Protein ZGRF1 OS=Homo sapiens OX=9606 GN=ZGRF1 PE=1 SV=3	55345	1	0	ZGRF1	C4orf21	protein-coding	4q25	zinc finger GRF-type containing 1 ||| Protein ZGRF1	.		11.1159	7.67582	11.1878		13.3351	11.2412	10.0945	8.6416	8.09131	-2.36237	1.14962
sp|A0A0A6YYL3|POTEB_HUMAN;sp|A0JP26|POTB3_HUMAN;sp|A5A3E0|POTEF_HUMAN;sp|B2RU33|POTEC_HUMAN;sp|H3BUK9|POTB2_HUMAN;sp|P0CG38|POTEI_HUMAN;sp|P0CG39|POTEJ_HUMAN;sp|Q6S8J3|POTEE_HUMAN;sp|Q6S8J7|POTEA_HUMAN	sp|Q6S8J3|POTEE_HUMAN;sp|A5A3E0|POTEF_HUMAN;sp|P0CG38|POTEI_HUMAN;sp|P0CG39|POTEJ_HUMAN;sp|Q6S8J7|POTEA_HUMAN;sp|B2RU33|POTEC_HUMAN;sp|H3BUK9|POTB2_HUMAN;sp|A0A0A6YYL3|POTEB_HUMAN;sp|A0JP26|POTB3_HUMAN	sp|A0A0A6YYL3|POTEB_HUMAN;sp|A0JP26|POTB3_HUMAN;sp|A5A3E0|POTEF_HUMAN;sp|B2RU33|POTEC_HUMAN;sp|H3BUK9|POTB2_HUMAN;sp|P0CG38|POTEI_HUMAN;sp|P0CG39|POTEJ_HUMAN;sp|Q6S8J3|POTEE_HUMAN;sp|Q6S8J7|POTEA_HUMAN	__Other	sp|A5A3E0|POTEF_HUMAN;sp|P0CG38|POTEI_HUMAN;sp|P0CG39|POTEJ_HUMAN;sp|Q6S8J3|POTEE_HUMAN	10;8;7;5;1;1;1;1;1	1;1;1;1;1;1;1;1;1	0;0;0;0;0;0;0;0;0	9	10	1	0	8.8	0.7	0	121.36	1075	1075;1075;1075;1038;498;542;544;544;581	1	-2	+			4491	0	0	0	POTEA_HUMAN Q6S8J7 POTB3_HUMAN A0JP26 POTB2_HUMAN H3BUK9 POTEB_HUMAN A0A0A6YYL3 POTEC_HUMAN B2RU33 POTEE_HUMAN Q6S8J3 POTEF_HUMAN A5A3E0 POTEI_HUMAN P0CG38 POTEJ_HUMAN P0CG39	sp|Q6S8J3|POTEE_HUMAN POTE ankyrin domain family member E OS=Homo sapiens OX=9606 GN=POTEE PE=2 SV=3;sp|A5A3E0|POTEF_HUMAN POTE ankyrin domain family member F OS=Homo sapiens OX=9606 GN=POTEF PE=1 SV=2;sp|P0CG38|POTEI_HUMAN POTE ankyrin domain family membe	340441 102724631 100996331 100287399 388468 445582 728378 653269 653781	9	5	POTEA POTEB3 POTEB POTEB2 POTEC POTEE POTEF POTEI POTEJ	A26A1 CT104.3 POTE-8 POTE8 POTE-15 POTEB A26B1 CT104.5 POTE15 POTEB2 A26B2 CT104.6 POTE-18 POTE18 A26C1 A26C1A CT104.2 POTE-2 POTE2 POTE2gamma A26C1B ACTB POTE2alpha POTEACTIN POTE2beta	protein-coding	8p11.1!15q11.2!18p11.21!2q21.1	POTE ankyrin domain family member A ||| POTE ankyrin domain family member B3 ||| POTE ankyrin domain family member B ||| POTE ankyrin domain family member B2 ||| POTE ankyrin domain family member B2 ||| POTE ankyrin domain family member B3 ||| POTE ankyrin domain family member C ||| POTE ankyrin domain family member E ||| POTE ankyrin domain family member F ||| POTE ankyrin domain family member I…	.	13.4616	13.6777	15.1781	14.626	15.351	11.4108	11.0939	12.5823	11.4486	11.1545	2.32242	1.77034
sp|P25815|S100P_HUMAN	sp|P25815|S100P_HUMAN	sp|P25815|S100P_HUMAN	__Other	sp|P25815|S100P_HUMAN	5	5	5	1	5	5	5	53.7	53.7	53.7	10.4	95	95	0	20.181				1925	0	0	0	S100P_HUMAN P25815	sp|P25815|S100P_HUMAN Protein S100-P OS=Homo sapiens OX=9606 GN=S100P PE=1 SV=2	6286	1	0	S100P	MIG9	protein-coding	4p16.1	S100 calcium binding protein P ||| Protein S100-P	.	14.0337	16.0576	13.468	14.9098	13.7369	18.621	13.705	16.1196	13.6288	13.5075	-1.24406	0.197713
sp|P34741|SDC2_HUMAN	sp|P34741|SDC2_HUMAN	sp|P34741|SDC2_HUMAN	__Other	sp|P34741|SDC2_HUMAN	2	2	2	1	2	2	2	11.9	11.9	11.9	22.16	201	201	0	15.446				2115	0	0	0	SDC2_HUMAN P34741	sp|P34741|SDC2_HUMAN Syndecan-2 OS=Homo sapiens OX=9606 GN=SDC2 PE=1 SV=2	6383	1	0	SDC2	CD362 HSPG HSPG1 SYND2	protein-coding	8q22.1	syndecan 2 ||| Syndecan-2	.		12.9522	11.1608	10.5068	11.0454	9.7334	11.8251	15.6938	11.4974	12.6967	-0.609104	-1.26313
sp|O95471|CLD7_HUMAN	sp|O95471|CLD7_HUMAN	sp|O95471|CLD7_HUMAN	__Other	sp|O95471|CLD7_HUMAN	3	3	3	1	3	3	3	19.4	19.4	19.4	22.418	211	211	0	19.161				1148	0	0	0	CLD7_HUMAN O95471	sp|O95471|CLD7_HUMAN Claudin-7 OS=Homo sapiens OX=9606 GN=CLDN7 PE=1 SV=4	1366	1	0	CLDN7	CEPTRL2 CLDN-7 CPETRL2 Hs.84359 claudin-1	protein-coding	17p13.1	claudin 7 ||| Claudin-7	.	15.7597	14.6989	12.9586	16.0966	12.769	16.4518	12.4798	15.5045	12.8752	12.0741	-0.942585	2.19541
sp|Q96A00|PP14A_HUMAN	sp|Q96A00|PP14A_HUMAN	sp|Q96A00|PP14A_HUMAN	__Other	sp|Q96A00|PP14A_HUMAN	2	2	2	1	2	2	2	18.4	18.4	18.4	16.693	147	147	0	7.0576				5857	0	0	0	PP14A_HUMAN Q96A00	sp|Q96A00|PP14A_HUMAN Protein phosphatase 1 regulatory subunit 14A OS=Homo sapiens OX=9606 GN=PPP1R14A PE=1 SV=1	94274	1	0	PPP1R14A	CPI-17 CPI17 PPP1INL	protein-coding	19q13.2	protein phosphatase 1 regulatory inhibitor subunit 14A ||| Protein phosphatase 1 regulatory subunit 14A	.	12.6493	12.8238	10.8443	13.384	13.5044	9.45524	13.0456	14.1859	13.4886	10.3902	-1.44301	1.09672
sp|Q9HCJ1|ANKH_HUMAN	sp|Q9HCJ1|ANKH_HUMAN	sp|Q9HCJ1|ANKH_HUMAN	__Other	sp|Q9HCJ1|ANKH_HUMAN	1	1	1	1	1	1	1	2.8	2.8	2.8	54.24	492	492	0.00012786	2.8033				7260	0	0	0	ANKH_HUMAN Q9HCJ1	sp|Q9HCJ1|ANKH_HUMAN Progressive ankylosis protein homolog OS=Homo sapiens OX=9606 GN=ANKH PE=1 SV=2	56172	1	0	ANKH	ANK CCAL2 CMDJ CPPDD HANK MANK SLC62A1	protein-coding	5p15.2	ANKH inorganic pyrophosphate transport regulator ||| Progressive ankylosis protein homolog	.		10.9769	9.65681	10.5834	12.694	9.21118	9.22324	7.12556	10.431	12.1825	-0.481644	0.444915
sp|P16422|EPCAM_HUMAN	sp|P16422|EPCAM_HUMAN	sp|P16422|EPCAM_HUMAN	__Other	sp|P16422|EPCAM_HUMAN	14	14	14	1	14	14	14	42.7	42.7	42.7	34.932	314	314	0	231.88				1702	0	0	0	EPCAM_HUMAN P16422	sp|P16422|EPCAM_HUMAN Epithelial cell adhesion molecule OS=Homo sapiens OX=9606 GN=EPCAM PE=1 SV=2	4072	1	0	EPCAM	DIAR5 EGP-2 EGP314 EGP40 ESA HNPCC8 KS1/4 KSA M4S1 MIC18 MK-1 TACSTD1 TROP1	protein-coding	2p21	epithelial cell adhesion molecule	.	18.7272	17.3595	15.3737	19.2783	15.2364	18.233	15.2297	18.5829	15.5882	15.2708	-1.22544	2.67919
sp|Q9HCM1|RESF1_HUMAN	sp|Q9HCM1|RESF1_HUMAN	sp|Q9HCM1|RESF1_HUMAN	__Other	sp|Q9HCM1|RESF1_HUMAN	3	3	3	1	3	3	3	2.2	2.2	2.2	194.86	1747	1747	0.00075197	2.2486				7263	0	0	0	RESF1_HUMAN Q9HCM1	sp|Q9HCM1|RESF1_HUMAN Retroelement silencing factor 1 OS=Homo sapiens OX=9606 GN=RESF1 PE=1 SV=3	55196	1	0	RESF1	C12orf35 GET KIAA1551 UTA2-1	protein-coding	12p11.21	retroelement silencing factor 1	.	13.46	14.2438	12.226	13.0856	12.0977	16.6425	12.0613	14.5651	12.036	11.772	-0.834801	0.0248117
sp|P08253|MMP2_HUMAN	sp|P08253|MMP2_HUMAN	sp|P08253|MMP2_HUMAN	__Other	sp|P08253|MMP2_HUMAN	2	2	2	1	2	2	2	4.4	4.4	4.4	73.881	660	660	0	6.217				1436	0	0	0	MMP2_HUMAN P08253	sp|P08253|MMP2_HUMAN 72 kDa type IV collagenase OS=Homo sapiens OX=9606 GN=MMP2 PE=1 SV=2	4313	1	0	MMP2	CLG4 CLG4A MMP-2 MMP-II MONA TBE-1	protein-coding	16q12.2	matrix metallopeptidase 2 ||| 72 kDa type IV collagenase	.		11.325	11.0623	8.64488	13.7185	9.20062	9.22709	9.40323	11.3737	10.3765	0.686404	-1.73097
sp|Q5XXA6|ANO1_HUMAN	sp|Q5XXA6|ANO1_HUMAN	sp|Q5XXA6|ANO1_HUMAN	__Other	sp|Q5XXA6|ANO1_HUMAN	2	2	2	1	2	2	2	2.3	2.3	2.3	114.08	986	986	0	5.4083				4269	0	0	0	ANO1_HUMAN Q5XXA6	sp|Q5XXA6|ANO1_HUMAN Anoctamin-1 OS=Homo sapiens OX=9606 GN=ANO1 PE=1 SV=1	55107	1	0	ANO1	DOG1 ORAOV2 TAOS2 TMEM16A	protein-coding	11q13.3	anoctamin 1 ||| Anoctamin-1	.	11.8062	9.98014	8.21225	12.258	9.19513	8.16589	7.52573	10.3212	7.66692	9.58046	-0.903449	3.14227
sp|O60218|AK1BA_HUMAN	sp|O60218|AK1BA_HUMAN	sp|O60218|AK1BA_HUMAN	__Other	sp|O60218|AK1BA_HUMAN	23	23	17	1	23	23	17	64.2	64.2	44	36.019	316	316	0	202.87				707	0	0	0	AK1BA_HUMAN O60218	sp|O60218|AK1BA_HUMAN Aldo-keto reductase family 1 member B10 OS=Homo sapiens OX=9606 GN=AKR1B10 PE=1 SV=2	57016	1	0	AKR1B10	AKR1B11 AKR1B12 ALDRLn ARL-1 ARL1 HIS HSI	protein-coding	7q33	aldo-keto reductase family 1 member B10	.	17.9411	18.8121	17.2315	17.987	19.3774	21.1865	16.9025	16.633	17.0612	16.8682	-0.674417	0.0810984
sp|P04732|MT1E_HUMAN	sp|P04732|MT1E_HUMAN	sp|P04732|MT1E_HUMAN	__Other	sp|P04732|MT1E_HUMAN	4	2	1	1	4	2	1	67.2	45.9	32.8	6.0142	61	61	0	29.231				1327	0	0	0	MT1E_HUMAN P04732	sp|P04732|MT1E_HUMAN Metallothionein-1E OS=Homo sapiens OX=9606 GN=MT1E PE=1 SV=1	4493	1	0	MT1E	MT-1E MT-IE MT1 MTD	protein-coding	16q13	metallothionein 1E ||| Metallothionein-1E	.	15.8655	15.707	16.5439	16.7655	12.8134	13.3382	13.8999	16.3406	15.4358	16.1776	1.37953	1.60109
sp|Q8WXF7|ATLA1_HUMAN	sp|Q8WXF7|ATLA1_HUMAN	sp|Q8WXF7|ATLA1_HUMAN	__Other	sp|Q8WXF7|ATLA1_HUMAN	4	3	3	1	4	3	3	6.5	4.5	4.5	63.543	558	558	0	8.2199				5641	0	0	0	ATLA1_HUMAN Q8WXF7	sp|Q8WXF7|ATLA1_HUMAN Atlastin-1 OS=Homo sapiens OX=9606 GN=ATL1 PE=1 SV=1	51062	1	0	ATL1	AD-FSP FSP1 GBP3 HSN1D SPG3 SPG3A atlastin1	protein-coding	14q22.1	atlastin GTPase 1 ||| Atlastin-1	.	13.153	11.6924	9.48571	13.8372	8.48057	11.4378	11.5887	11.1728	11.3815	11.0124	-1.56387	2.78764
sp|O15479|MAGB2_HUMAN;sp|O15481|MAGB4_HUMAN;sp|P43366|MAGB1_HUMAN;sp|Q96LZ2|MAGBA_HUMAN;sp|Q9UBF1|MAGC2_HUMAN	sp|O15479|MAGB2_HUMAN;sp|O15481|MAGB4_HUMAN;sp|Q96LZ2|MAGBA_HUMAN;sp|P43366|MAGB1_HUMAN;sp|Q9UBF1|MAGC2_HUMAN	sp|O15479|MAGB2_HUMAN;sp|O15481|MAGB4_HUMAN;sp|P43366|MAGB1_HUMAN;sp|Q96LZ2|MAGBA_HUMAN;sp|Q9UBF1|MAGC2_HUMAN	__Other	sp|O15479|MAGB2_HUMAN	3;1;1;1;1	3;1;1;1;1	3;1;1;1;1	5	3	3	3	8.8	8.8	8.8	35.277	319	319;346;347;347;373	0	3.7409				554	0	0	0	MAGB1_HUMAN P43366 MAGBA_HUMAN Q96LZ2 MAGB2_HUMAN O15479 MAGB4_HUMAN O15481 MAGC2_HUMAN Q9UBF1	sp|O15479|MAGB2_HUMAN Melanoma-associated antigen B2 OS=Homo sapiens OX=9606 GN=MAGEB2 PE=1 SV=3	4112 139422 4113 4115 51438	5	4	MAGEB1 MAGEB10 MAGEB2 MAGEB4 MAGEC2	CT3.1 DAM10 MAGE-Xp MAGEL1 CT3.2 DAM6 MAGE-XP-2 CT3.6 CT10 HCA587 MAGEE1	protein-coding	Xp21.2!Xp21.3!Xq27.2	MAGE family member B1 ||| Melanoma-associated antigen B1 ||| MAGE family member B10 ||| Melanoma-associated antigen B10 ||| MAGE family member B2 ||| Melanoma-associated antigen B2 ||| MAGE family member B4 ||| Melanoma-associated antigen B4 ||| MAGE family member C2 ||| Melanoma-associated antigen C2	.	11.5211	12.6679	12.0139	11.1531	15.2638	10.5411	10.6554	11.1525	10.6105	11.0804	0.455046	-0.405697
sp|Q92959|SO2A1_HUMAN	sp|Q92959|SO2A1_HUMAN	sp|Q92959|SO2A1_HUMAN	__Other	sp|Q92959|SO2A1_HUMAN	1	1	1	1	1	1	1	2	2	2	70.043	643	643	0	3.3227				5787	0	0	0	SO2A1_HUMAN Q92959	sp|Q92959|SO2A1_HUMAN Solute carrier organic anion transporter family member 2A1 OS=Homo sapiens OX=9606 GN=SLCO2A1 PE=1 SV=2	6578	1	0	SLCO2A1	MATR1 OATP2A1 PGT PHOAR2 SLC21A2	protein-coding	3q22.1-q22.2	solute carrier organic anion transporter family member 2A1	.	11.8903	10.4017	7.96523	12.5007	10.9854		7.85317	8.78405	9.49578	9.61271	-1.63434	2.9011
sp|Q9BUF7|CRUM3_HUMAN	sp|Q9BUF7|CRUM3_HUMAN	sp|Q9BUF7|CRUM3_HUMAN	__Other	sp|Q9BUF7|CRUM3_HUMAN	1	1	1	1	1	1	1	14.2	14.2	14.2	12.854	120	120	0	17.639				6636	0	0	0	CRUM3_HUMAN Q9BUF7	sp|Q9BUF7|CRUM3_HUMAN Protein crumbs homolog 3 OS=Homo sapiens OX=9606 GN=CRB3 PE=1 SV=3	92359	1	0	CRB3	---	protein-coding	19p13.3	crumbs cell polarity complex component 3 ||| Protein crumbs homolog 3	.		10.1537		11.287		12.1986		11.2578	7.01876		NA	0.846461
sp|Q13268|DHRS2_HUMAN	sp|Q13268|DHRS2_HUMAN	sp|Q13268|DHRS2_HUMAN	__Other	sp|Q13268|DHRS2_HUMAN	17	17	17	1	17	17	17	72.1	72.1	72.1	29.926	280	280	0	323.31				3356	0	0	0	DHRS2_HUMAN Q13268	sp|Q13268|DHRS2_HUMAN Dehydrogenase/reductase SDR family member 2, mitochondrial OS=Homo sapiens OX=9606 GN=DHRS2 PE=1 SV=4	10202	1	0	DHRS2	HEP27 SDR25C1	protein-coding	14q11.2	dehydrogenase/reductase 2 ||| Dehydrogenase/reductase SDR family member 2, mitochondrial	.	16.6156	18.0063	16.4675	16.2456	16.0585	16.0326	16.3409	20.6347	16.8981	16.3121	-0.406274	-0.62815
sp|Q96J66|ABCCB_HUMAN	sp|Q96J66|ABCCB_HUMAN	sp|Q96J66|ABCCB_HUMAN	__Other	sp|Q96J66|ABCCB_HUMAN	1	1	1	1	1	1	1	0.7	0.7	0.7	154.3	1382	1382	0.0035504	1.6594				6168	0	0	0	ABCCB_HUMAN Q96J66	sp|Q96J66|ABCCB_HUMAN ATP-binding cassette sub-family C member 11 OS=Homo sapiens OX=9606 GN=ABCC11 PE=1 SV=1	85320	1	0	ABCC11	EWWD MRP8 WW	protein-coding	16q12.1	ATP binding cassette subfamily C member 11 ||| ATP-binding cassette sub-family C member 11	.	12.4821	13.3214	12.2646	12.4801	14.0141	15.6201	11.5753	10.8536	11.6581	12.1383	-0.310953	-0.0954314
sp|Q14508|WFDC2_HUMAN	sp|Q14508|WFDC2_HUMAN	sp|Q14508|WFDC2_HUMAN	__Other	sp|Q14508|WFDC2_HUMAN	1	1	1	1	1	1	1	11.3	11.3	11.3	12.993	124	124	0	5.7816				3561	0	0	0	WFDC2_HUMAN Q14508	sp|Q14508|WFDC2_HUMAN WAP four-disulfide core domain protein 2 OS=Homo sapiens OX=9606 GN=WFDC2 PE=1 SV=2	10406	1	0	WFDC2	EDDM4 HE4 WAP5 dJ461P17.6	protein-coding	20q13.12	WAP four-disulfide core domain 2 ||| WAP four-disulfide core domain protein 2	.		10.6593	9.6748	11.0187	8.88315	13.1822	9.24228	11.6139	9.2957	9.12408	-0.579558	0.764337
sp|Q14627|I13R2_HUMAN	sp|Q14627|I13R2_HUMAN	sp|Q14627|I13R2_HUMAN	__Other	sp|Q14627|I13R2_HUMAN	5	5	5	1	5	5	5	11.8	11.8	11.8	44.176	380	380	0	4.4809				3576	0	0	0	I13R2_HUMAN Q14627	sp|Q14627|I13R2_HUMAN Interleukin-13 receptor subunit alpha-2 OS=Homo sapiens OX=9606 GN=IL13RA2 PE=1 SV=1	3598	1	0	IL13RA2	CD213A2 CT19 IL-13R IL13BP	protein-coding	Xq23	interleukin 13 receptor subunit alpha 2 ||| Interleukin-13 receptor subunit alpha-2	.	14.5433	14.9236	14.3572	13.343	17.6091	13.0671	13.397	13.3881	13.1471	13.3346	0.401788	-0.612429
sp|P28908|TNR8_HUMAN	sp|P28908|TNR8_HUMAN	sp|P28908|TNR8_HUMAN	__Other	sp|P28908|TNR8_HUMAN	4	4	4	1	4	4	4	7.6	7.6	7.6	63.747	595	595	0	13.464				1989	0	0	0	TNR8_HUMAN P28908	sp|P28908|TNR8_HUMAN Tumor necrosis factor receptor superfamily member 8 OS=Homo sapiens OX=9606 GN=TNFRSF8 PE=1 SV=1	943	1	0	TNFRSF8	CD30 D1S166E Ki-1	protein-coding	1p36.22	TNF receptor superfamily member 8 ||| Tumor necrosis factor receptor superfamily member 8	.	12.998	13.3818	12.9156	11.9607	15.8659	11.4951	11.4462	11.3624	11.6511	11.907	0.590102	-0.364843
sp|Q9HC84|MUC5B_HUMAN	sp|Q9HC84|MUC5B_HUMAN	sp|Q9HC84|MUC5B_HUMAN	__Other	sp|Q9HC84|MUC5B_HUMAN	3	3	3	1	3	3	3	0.9	0.9	0.9	596.33	5762	5762	0.00075179	2.2465				7249	0	0	0	MUC5B_HUMAN Q9HC84	sp|Q9HC84|MUC5B_HUMAN Mucin-5B OS=Homo sapiens OX=9606 GN=MUC5B PE=1 SV=3	727897	1	0	MUC5B	MG1 MUC-5B MUC5 MUC9	protein-coding	11p15.5	mucin 5B, oligomeric mucus/gel-forming ||| Mucin-5B	.	10.8693	11.9025	10.368	12.4984	10.4189	13.4963	9.32857	12.1938	12.3251	9.80171	-0.935856	1.19455
sp|Q02383|SEMG2_HUMAN	sp|Q02383|SEMG2_HUMAN	sp|Q02383|SEMG2_HUMAN	__Other	sp|Q02383|SEMG2_HUMAN	3	2	2	1	3	2	2	6.9	3.1	3.1	65.444	582	582	0.00402	1.544				3093	0	0	0	SEMG2_HUMAN Q02383	sp|Q02383|SEMG2_HUMAN Semenogelin-2 OS=Homo sapiens OX=9606 GN=SEMG2 PE=1 SV=1	6407	1	0	SEMG2	SGII	protein-coding	20q13.12	semenogelin 2 ||| Semenogelin-2	.	11.5161	10.2274	14.4304	9.93641	10.4448	10.4544	9.92641	11.2731	10.2151	10.2358	3.56582	-0.928133
sp|Q9BVA1|TBB2B_HUMAN	sp|Q9BVA1|TBB2B_HUMAN	sp|Q9BVA1|TBB2B_HUMAN	__Other	sp|Q9BVA1|TBB2B_HUMAN	25	1	1	1	25	1	1	61.1	2.7	2.7	49.953	445	445	0	5.2331				6671	0	0	0	TBB2B_HUMAN Q9BVA1	sp|Q9BVA1|TBB2B_HUMAN Tubulin beta-2B chain OS=Homo sapiens OX=9606 GN=TUBB2B PE=1 SV=1	347733	1	0	TUBB2B	CDCBM7 PMGYSA bA506K6.1	protein-coding	6p25.2	tubulin beta 2B class IIb ||| Tubulin beta-2B chain	.		13.5953	14.1762	11.1007	11.5904	11.4575	12.9824	11.8553	12.0167	15.3735	1.60708	-1.46836
sp|Q15847|ADIRF_HUMAN	sp|Q15847|ADIRF_HUMAN	sp|Q15847|ADIRF_HUMAN	__Other	sp|Q15847|ADIRF_HUMAN	6	6	6	1	6	6	6	80.3	80.3	80.3	7.8547	76	76	0	215.36				3814	0	0	0	ADIRF_HUMAN Q15847	sp|Q15847|ADIRF_HUMAN Adipogenesis regulatory factor OS=Homo sapiens OX=9606 GN=ADIRF PE=1 SV=1	10974	1	0	ADIRF	AFRO APM2 C10orf116 apM-2	protein-coding	10q23.2	adipogenesis regulatory factor	.	16.6806	15.4528	16.0104	17.3222	13.3545	15.194	13.6618	16.4415	13.7758	13.8958	1.05338	2.36523
sp|Q6UWI4|SHSA2_HUMAN	sp|Q6UWI4|SHSA2_HUMAN	sp|Q6UWI4|SHSA2_HUMAN	__Other	sp|Q6UWI4|SHSA2_HUMAN	3	3	3	1	3	3	3	9.5	9.5	9.5	31.375	295	295	0.0050934	1.4024				4512	0	0	0	SHSA2_HUMAN Q6UWI4	sp|Q6UWI4|SHSA2_HUMAN Protein shisa-2 homolog OS=Homo sapiens OX=9606 GN=SHISA2 PE=1 SV=1	387914	1	0	SHISA2	C13orf13 PRO28631 TMEM46 WGAR9166 bA398O19.2 hShisa	protein-coding	13q12.13	shisa family member 2 ||| Protein shisa-2 homolog	.		11.2041	10.9859	8.82451	10.2106	9.39819	10.4307	9.73953	13.7412	10.9306	0.453212	-1.70815
sp|P29508|SPB3_HUMAN	sp|P29508|SPB3_HUMAN	sp|P29508|SPB3_HUMAN	__Other	sp|P29508|SPB3_HUMAN	1	1	1	1	1	1	1	2.1	2.1	2.1	44.564	390	390	0.0088232	1.0469				2006	0	0	0	SPB3_HUMAN P29508	sp|P29508|SPB3_HUMAN Serpin B3 OS=Homo sapiens OX=9606 GN=SERPINB3 PE=1 SV=2	6317	1	0	SERPINB3	HsT1196 SCC SCCA-1 SCCA-PD SCCA1 SSCA1 T4-A	protein-coding	18q21.33	serpin family B member 3 ||| Serpin B3	.		11.435	9.7491	10.4993	10.1015	13.9905	9.86106	9.42314	10.0178	9.57002	-0.65246	0.0977067
sp|O95994|AGR2_HUMAN;sp|Q8TD06|AGR3_HUMAN	sp|O95994|AGR2_HUMAN;sp|Q8TD06|AGR3_HUMAN	sp|O95994|AGR2_HUMAN;sp|Q8TD06|AGR3_HUMAN	__Other	sp|O95994|AGR2_HUMAN	9;1	9;1	9;1	2	9	9	9	56	56	56	19.979	175	175;166	0	94.107				1221	0	0	0	AGR2_HUMAN O95994 AGR3_HUMAN Q8TD06	sp|O95994|AGR2_HUMAN Anterior gradient protein 2 homolog OS=Homo sapiens OX=9606 GN=AGR2 PE=1 SV=1	10551 155465	2	2	AGR2 AGR3	AG-2 AG2 GOB-4 HAG-2 HEL-S-116 HPC8 PDIA17 XAG-2 AG-3 AG3 BCMP11 HAG3 PDIA18 hAG-3	protein-coding	7p21.1	anterior gradient 2, protein disulphide isomerase family member ||| Anterior gradient protein 2 homolog ||| anterior gradient 3, protein disulphide isomerase family member ||| Anterior gradient protein 3	.	17.0104	17.6554	15.881	17.1996	15.831	20.0897	15.765	17.505	16.1598	16.1325	-0.939491	0.379104
sp|O15523|DDX3Y_HUMAN	sp|O15523|DDX3Y_HUMAN	sp|O15523|DDX3Y_HUMAN	__Other	sp|O15523|DDX3Y_HUMAN	32	3	3	1	32	3	3	52	5	5	73.153	660	660	0	6.2235				561	0	0	0	DDX3Y_HUMAN O15523	sp|O15523|DDX3Y_HUMAN ATP-dependent RNA helicase DDX3Y OS=Homo sapiens OX=9606 GN=DDX3Y PE=1 SV=2	8653	1	0	DDX3Y	DBY	protein-coding	Yq11.221	DEAD-box helicase 3 Y-linked ||| ATP-dependent RNA helicase DDX3Y	.	11.2065	12.4202	11.1302	10.7976	10.7417	10.2112	11.4182	14.965	11.1929	11.9693	-0.423079	-0.755667
sp|Q8TD47|RS4Y2_HUMAN	sp|Q8TD47|RS4Y2_HUMAN	sp|Q8TD47|RS4Y2_HUMAN	__Other	sp|Q8TD47|RS4Y2_HUMAN	13	1	0	1	13	1	0	31.6	3.8	0	29.295	263	263	1	-2	+			5482	0	0	0	RS4Y2_HUMAN Q8TD47	sp|Q8TD47|RS4Y2_HUMAN 40S ribosomal protein S4, Y isoform 2 OS=Homo sapiens OX=9606 GN=RPS4Y2 PE=2 SV=3	140032	1	0	RPS4Y2	RPS4Y2P	protein-coding	Yq11.223	ribosomal protein S4 Y-linked 2 ||| 40S ribosomal protein S4, Y isoform 2	.		11.223	9.47786	9.07448	9.01635	9.66566	8.73758	13.301	9.50991	9.17565	-0.26695	-0.670324
sp|Q6UX71|PXDC2_HUMAN	sp|Q6UX71|PXDC2_HUMAN	sp|Q6UX71|PXDC2_HUMAN	__Other	sp|Q6UX71|PXDC2_HUMAN	1	1	1	1	1	1	1	2.1	2.1	2.1	59.582	529	529	0.0013687	2.0774				4523	0	0	0	PXDC2_HUMAN Q6UX71	sp|Q6UX71|PXDC2_HUMAN Plexin domain-containing protein 2 OS=Homo sapiens OX=9606 GN=PLXDC2 PE=1 SV=1	84898	1	0	PLXDC2	TEM7R	protein-coding	10p12.31	plexin domain containing 2 ||| Plexin domain-containing protein 2	.		10.5848	12.5731	8.09175	11.391	9.23466	8.98038	10.5773	9.09333	9.67776	2.62074	-1.86066
sp|Q6P5W5|S39A4_HUMAN	sp|Q6P5W5|S39A4_HUMAN	sp|Q6P5W5|S39A4_HUMAN	__Other	sp|Q6P5W5|S39A4_HUMAN	2	2	2	1	2	2	2	3.4	3.4	3.4	68.407	647	647	0.00038236	2.7322				4437	0	0	0	S39A4_HUMAN Q6P5W5	sp|Q6P5W5|S39A4_HUMAN Zinc transporter ZIP4 OS=Homo sapiens OX=9606 GN=SLC39A4 PE=1 SV=4	55630	1	0	SLC39A4	AEZ AWMS2 ZIP4	protein-coding	8q24.3	solute carrier family 39 member 4 ||| Zinc transporter ZIP4	.	11.1624	11.275	10.7423	11.853	9.55759	10.281	9.75501	13.9711	10.2602	9.97608	-0.057226	1.05342
sp|Q5W0U4|BSPRY_HUMAN	sp|Q5W0U4|BSPRY_HUMAN	sp|Q5W0U4|BSPRY_HUMAN	__Other	sp|Q5W0U4|BSPRY_HUMAN	11	11	11	1	11	11	11	34.3	34.3	34.3	44.381	402	402	0	87.068				4263	0	0	0	BSPRY_HUMAN Q5W0U4	sp|Q5W0U4|BSPRY_HUMAN B box and SPRY domain-containing protein OS=Homo sapiens OX=9606 GN=BSPRY PE=2 SV=1	54836	1	0	BSPRY	---	protein-coding	9q32	B-box and SPRY domain containing ||| B box and SPRY domain-containing protein	.	16.664	14.6828	13.1957	16.9733	13.178	15.0345	12.9172	15.0263	13.1809	13.0262	-0.870854	2.90678
sp|Q92623|TTC9A_HUMAN	sp|Q92623|TTC9A_HUMAN	sp|Q92623|TTC9A_HUMAN	__Other	sp|Q92623|TTC9A_HUMAN	1	1	1	1	1	1	1	5	5	5	24.379	222	222	0.0013695	2.0838				5717	0	0	0	TTC9A_HUMAN Q92623	sp|Q92623|TTC9A_HUMAN Tetratricopeptide repeat protein 9A OS=Homo sapiens OX=9606 GN=TTC9 PE=1 SV=3	23508	1	0	TTC9	TTC9A	protein-coding	14q24.2	tetratricopeptide repeat domain 9 ||| Tetratricopeptide repeat protein 9A	.		10.9961	9.22051	10.7413	9.67061	12.5425	9.15571	12.4354	9.30281	9.13482	-1.05495	0.465847
sp|Q8WVV4|POF1B_HUMAN	sp|Q8WVV4|POF1B_HUMAN	sp|Q8WVV4|POF1B_HUMAN	__Other	sp|Q8WVV4|POF1B_HUMAN	3	3	3	1	3	3	3	6.3	6.3	6.3	68.064	589	589	0	8.8193				5610	0	0	0	POF1B_HUMAN Q8WVV4	sp|Q8WVV4|POF1B_HUMAN Protein POF1B OS=Homo sapiens OX=9606 GN=POF1B PE=1 SV=3	79983	1	0	POF1B	POF POF2B	protein-coding	Xq21.1	POF1B actin binding protein ||| Protein POF1B	.	13.1291	12.8152	11.6748	13.5024	12.1558	14.409	12.0377	12.8211	10.3543	10.1606	-0.464703	1.36293
sp|Q96A08|H2B1A_HUMAN	sp|Q96A08|H2B1A_HUMAN	sp|Q96A08|H2B1A_HUMAN	__Other	sp|Q96A08|H2B1A_HUMAN	9	3	3	1	9	3	3	55.9	19.7	19.7	14.167	127	127	0	17.054				5858	0	0	0	H2B1A_HUMAN Q96A08	sp|Q96A08|H2B1A_HUMAN Histone H2B type 1-A OS=Homo sapiens OX=9606 GN=HIST1H2BA PE=1 SV=3	255626	1	0	H2BC1	H2BFU HIST1H2BA STBP TH2B TSH2B TSH2B.1 bA317E16.3 hTSH2B	protein-coding	6p22.2	H2B clustered histone 1 ||| Histone H2B type 1-A	.	14.828	15.9025	14.3572	14.3145	14.2493	14.2033	14.1334	18.4196	14.8887	14.3651	-0.509198	-0.551831
sp|P01911|2B1F_HUMAN;sp|P01912|2B13_HUMAN;sp|P04229|2B11_HUMAN;sp|P13760|2B14_HUMAN;sp|P13761|2B17_HUMAN;sp|P13762|DRB4_HUMAN;sp|P20039|2B1B_HUMAN;sp|P79483|DRB3_HUMAN;sp|Q29974|2B1G_HUMAN;sp|Q30134|2B18_HUMAN;sp|Q30167|2B1A_HUMAN;sp|Q5Y7A7|2B1D_HUMAN;sp|Q95IE3|2B1C_HUMAN;sp|Q9GIY3|2B1E_HUMAN;sp|Q9TQE0|2B19_HUMAN	sp|Q9GIY3|2B1E_HUMAN;sp|P13762|DRB4_HUMAN;sp|Q9TQE0|2B19_HUMAN;sp|Q30134|2B18_HUMAN;sp|Q29974|2B1G_HUMAN;sp|P79483|DRB3_HUMAN;sp|P13761|2B17_HUMAN;sp|P13760|2B14_HUMAN;sp|P04229|2B11_HUMAN;sp|Q95IE3|2B1C_HUMAN;sp|Q5Y7A7|2B1D_HUMAN;sp|Q30167|2B1A_HUMAN;sp|P20039|2B1B_HUMAN;sp|P01912|2B13_HUMAN;sp|P01911|2B1F_HUMAN	sp|P01911|2B1F_HUMAN;sp|P01912|2B13_HUMAN;sp|P04229|2B11_HUMAN;sp|P13760|2B14_HUMAN;sp|P13761|2B17_HUMAN;sp|P13762|DRB4_HUMAN;sp|P20039|2B1B_HUMAN;sp|P79483|DRB3_HUMAN;sp|Q29974|2B1G_HUMAN;sp|Q30134|2B18_HUMAN;sp|Q30167|2B1A_HUMAN;sp|Q5Y7A7|2B1D_HUMAN;sp|Q95IE3|2B1C_HUMAN;sp|Q9GIY3|2B1E_HUMAN;sp|Q9TQE0|2B19_HUMAN	__Other	sp|P13762|DRB4_HUMAN;sp|Q9GIY3|2B1E_HUMAN	5;3;2;2;2;2;2;2;2;1;1;1;1;1;1	5;3;2;2;2;2;2;2;2;1;1;1;1;1;1	4;3;1;1;1;1;1;1;1;1;1;1;1;1;1	15	5	5	4	13.2	13.2	9.8	30.139	266	266;266;266;266;266;266;266;266;266;266;266;266;266;266;266	0	10.107				6857	0	0	0	P01911 DRB3_HUMAN P79483 DRB4_HUMAN P13762	sp|Q9GIY3|2B1E_HUMAN HLA class II histocompatibility antigen, DRB1-14 beta chain OS=Homo sapiens OX=9606 GN=HLA-DRB1 PE=1 SV=1;sp|P13762|DRB4_HUMAN HLA class II histocompatibility antigen, DR beta 4 chain OS=Homo sapiens OX=9606 GN=HLA-DRB4 PE=1 SV=2	3123 3125 3126 3127	4	2	HLA-DRB1 HLA-DRB3 HLA-DRB4 HLA-DRB5	DRB1 HLA-DR1B HLA-DRB SS1 DRB3 HLA-DPB1 HLA-DR3B DR4 DRB4 HLA-DR4B	protein-coding	6p21.32!6p21.3	major histocompatibility complex, class II, DR beta 1 ||| major histocompatibility complex, class II, DR beta 3 ||| major histocompatibility complex, class II, DR beta 4 ||| major histocompatibility complex, class II, DR beta 5 ||| HLA class II histocompatibility antigen, DRB1 beta chain ||| major histocompatibility complex, class II, DR beta 3 ||| HLA class II histocompatibility antigen, DR beta…	.	15.3438	13.9661	15.2543	16.0671	12.2752	12.544	12.2526	12.9357	13.6261	12.5804	1.8124	2.62518
sp|Q969L2|MAL2_HUMAN	sp|Q969L2|MAL2_HUMAN	sp|Q969L2|MAL2_HUMAN	__Other	sp|Q969L2|MAL2_HUMAN	1	1	1	1	1	1	1	6.2	6.2	6.2	19.125	176	176	0.00012781	2.7825				5830	0	0	0	MAL2_HUMAN Q969L2	sp|Q969L2|MAL2_HUMAN Protein MAL2 OS=Homo sapiens OX=9606 GN=MAL2 PE=1 SV=1	114569	1	0	MAL2	---	protein-coding	8q24.12	mal, T cell differentiation protein 2 (gene/pseudogene) ||| Protein MAL2	.	12.4072	12.4052	11.1751	13.4859	10.1274	13.3113	10.9607	14.0934	11.2253	11.2521	-0.778779	1.53195
sp|Q96GU1|PAGE5_HUMAN	sp|Q96GU1|PAGE5_HUMAN	sp|Q96GU1|PAGE5_HUMAN	__Other	sp|Q96GU1|PAGE5_HUMAN	10	10	10	1	10	10	10	74.6	74.6	74.6	14.046	130	130	0	194.14				6094	0	0	0	PAGE5_HUMAN Q96GU1	sp|Q96GU1|PAGE5_HUMAN P antigen family member 5 OS=Homo sapiens OX=9606 GN=PAGE5 PE=1 SV=2	90737	1	0	PAGE5	CT16 CT16.1 CT16.2 GAGEE1 PAGE-5	protein-coding	Xp11.21	PAGE family member 5 ||| P antigen family member 5	.	14.631	15.8094	14.6401	14.6164	14.3579	14.4092	14.0172	18.4909	14.9405	14.2994	-0.331306	-0.355033
sp|P15514|AREG_HUMAN	sp|P15514|AREG_HUMAN	sp|P15514|AREG_HUMAN	__Other	sp|P15514|AREG_HUMAN	4	4	4	1	4	4	4	15.5	15.5	15.5	27.895	252	252	0	9.3994				1670	0	0	0	AREG_HUMAN P15514	sp|P15514|AREG_HUMAN Amphiregulin OS=Homo sapiens OX=9606 GN=AREG PE=1 SV=2	374	1	0	AREG	AR AREGB CRDGF SDGF	protein-coding	4q13.3	amphiregulin	.	13.8879	14.0743	12.8885	14.5996	12.4016	12.6053	12.4164	16.3789	12.8477	12.3036	-0.416671	1.29438
sp|O00515|LAD1_HUMAN	sp|O00515|LAD1_HUMAN	sp|O00515|LAD1_HUMAN	__Other	sp|O00515|LAD1_HUMAN	27	27	27	1	27	27	27	50.3	50.3	50.3	57.13	517	517	0	132.81				354	0	0	0	LAD1_HUMAN O00515	sp|O00515|LAD1_HUMAN Ladinin-1 OS=Homo sapiens OX=9606 GN=LAD1 PE=1 SV=2	3898	1	0	LAD1	LadA	protein-coding	1q32.1	ladinin 1 ||| Ladinin-1	.	17.8225	17.3763	15.8687	18.1589	15.6957	18.9709	15.6183	18.4399	15.9635	15.7412	-0.938425	1.35174
sp|P51857|AK1D1_HUMAN	sp|P51857|AK1D1_HUMAN	sp|P51857|AK1D1_HUMAN	__Other	sp|P51857|AK1D1_HUMAN	2	2	2	1	2	2	2	3.1	3.1	3.1	37.376	326	326	0	7.6933				2550	0	0	0	AK1D1_HUMAN P51857	sp|P51857|AK1D1_HUMAN Aldo-keto reductase family 1 member D1 OS=Homo sapiens OX=9606 GN=AKR1D1 PE=1 SV=1	6718	1	0	AKR1D1	3o5bred CBAS2 SRD5B1	protein-coding	7q33	aldo-keto reductase family 1 member D1	.	14.5638	14.8753	13.4814	13.7599	15.4682	17.1148	13.1612	13.0622	14.5289	13.1291	-0.731836	-0.453313
sp|P13726|TF_HUMAN	sp|P13726|TF_HUMAN	sp|P13726|TF_HUMAN	__Other	sp|P13726|TF_HUMAN	9	9	9	1	9	9	9	31.2	31.2	31.2	33.067	295	295	0	315.58				1614	0	0	0	TF_HUMAN P13726	sp|P13726|TF_HUMAN Tissue factor OS=Homo sapiens OX=9606 GN=F3 PE=1 SV=1	2152	1	0	F3	CD142 TF TFA	protein-coding	1p21.3	coagulation factor III, tissue factor ||| Tissue factor	.	18.0472	16.9534	18.6753	18.2245	15.1164	15.3741	14.6566	16.3311	16.1163	16.5866	2.29017	1.8394
sp|Q5VWC8|HACD4_HUMAN	sp|Q5VWC8|HACD4_HUMAN	sp|Q5VWC8|HACD4_HUMAN	__Other	sp|Q5VWC8|HACD4_HUMAN	1	1	1	1	1	1	1	3.9	3.9	3.9	27.52	232	232	0.00075263	2.2802				4245	0	0	0	HACD4_HUMAN Q5VWC8	sp|Q5VWC8|HACD4_HUMAN Very-long-chain (3R)-3-hydroxyacyl-CoA dehydratase 4 OS=Homo sapiens OX=9606 GN=HACD4 PE=1 SV=1	401494	1	0	HACD4	PTPLAD2	protein-coding	9p21.3	3-hydroxyacyl-CoA dehydratase 4 ||| Very-long-chain (3R)-3-hydroxyacyl-CoA dehydratase 4	.	13.2385	11.9118	10.0117	13.7028	11.9641	10.3349	9.59733	12.8849	11.3095	11.8343	-1.44327	2.24786
sp|Q7L5L3|GDPD3_HUMAN	sp|Q7L5L3|GDPD3_HUMAN	sp|Q7L5L3|GDPD3_HUMAN	__Other	sp|Q7L5L3|GDPD3_HUMAN	11	11	11	1	11	11	11	34.3	34.3	34.3	36.596	318	318	0	81.046				4655	0	0	0	GDPD3_HUMAN Q7L5L3	sp|Q7L5L3|GDPD3_HUMAN Lysophospholipase D GDPD3 OS=Homo sapiens OX=9606 GN=GDPD3 PE=2 SV=3	79153	1	0	GDPD3	GDE7	protein-coding	16p11.2	glycerophosphodiester phosphodiesterase domain containing 3 ||| Lysophospholipase D GDPD3	.	15.7205	16.3195	14.797	15.7748	14.7519	18.8461	14.8384	14.9266	14.7381	14.6695	-0.620821	0.356979
sp|Q8WUX1|S38A5_HUMAN	sp|Q8WUX1|S38A5_HUMAN	sp|Q8WUX1|S38A5_HUMAN	__Other	sp|Q8WUX1|S38A5_HUMAN	1	1	1	1	1	1	1	3.6	3.6	3.6	51.457	472	472	0.00062941	2.4147				5575	0	0	0	S38A5_HUMAN Q8WUX1	sp|Q8WUX1|S38A5_HUMAN Sodium-coupled neutral amino acid transporter 5 OS=Homo sapiens OX=9606 GN=SLC38A5 PE=1 SV=1	92745	1	0	SLC38A5	JM24 SN2 SNAT5 pp7194	protein-coding	Xp11.23	solute carrier family 38 member 5 ||| Sodium-coupled neutral amino acid transporter 5	.	11.952	12.217	11.2227	10.1983	13.4137	10.5994	10.4823	11.0281	14.0809	11.1345	-0.297316	-1.32173
sp|P23141|EST1_HUMAN;sp|Q9UKY3|CES1P_HUMAN	sp|P23141|EST1_HUMAN;sp|Q9UKY3|CES1P_HUMAN	sp|P23141|EST1_HUMAN;sp|Q9UKY3|CES1P_HUMAN	__Other	sp|P23141|EST1_HUMAN	31;3	31;3	31;3	2	31	31	31	58	58	58	62.52	567	567;287	0	224.38				1864	0	0	0	EST1_HUMAN P23141 CES1P_HUMAN Q9UKY3	sp|P23141|EST1_HUMAN Liver carboxylesterase 1 OS=Homo sapiens OX=9606 GN=CES1 PE=1 SV=2	1066 51716	2	2	CES1 CES1P1	ACAT CE-1 CEH CES2 HMSE HMSE1 PCE-1 REH SES1 TGH hCE-1 CES1A2 CES1A3 CES4 CESR PCE-3	protein-coding|pseudo	16q12.2	carboxylesterase 1 ||| Liver carboxylesterase 1 ||| carboxylesterase 1 pseudogene 1 ||| Putative inactive carboxylesterase 4	.	18.3704	18.9804	17.4615	18.111	17.7252	21.0653	17.2477	17.2723	19.9267	17.5033	-0.827664	-0.178105
sp|P29373|RABP2_HUMAN;sp|P29762|RABP1_HUMAN	sp|P29373|RABP2_HUMAN;sp|P29762|RABP1_HUMAN	sp|P29373|RABP2_HUMAN;sp|P29762|RABP1_HUMAN	__Other	sp|P29373|RABP2_HUMAN	10;1	10;1	10;1	2	10	10	10	68.1	68.1	68.1	15.693	138	138;137	0	85.572				2001	0	0	0	RABP1_HUMAN P29762 RABP2_HUMAN P29373	sp|P29373|RABP2_HUMAN Cellular retinoic acid-binding protein 2 OS=Homo sapiens OX=9606 GN=CRABP2 PE=1 SV=2	1381 1382	2	5	CRABP1 CRABP2	CRABP CRABP-I CRABPI RBP5 CRABP-II RBP6	protein-coding	15q25.1!1q23.1	cellular retinoic acid binding protein 1 ||| Cellular retinoic acid-binding protein 1 ||| cellular retinoic acid binding protein 2 ||| Cellular retinoic acid-binding protein 2	.	17.4381	17.1914	16.0667	17.909	15.2896	15.5975	16.0514	19.4062	16.119	15.569	-0.434301	1.40797
sp|P04279|SEMG1_HUMAN	sp|P04279|SEMG1_HUMAN	sp|P04279|SEMG1_HUMAN	__Other	sp|P04279|SEMG1_HUMAN	11	11	10	1	11	11	10	27.9	27.9	23.2	52.13	462	462	0	76.194				1319	0	0	0	SEMG1_HUMAN P04279	sp|P04279|SEMG1_HUMAN Semenogelin-1 OS=Homo sapiens OX=9606 GN=SEMG1 PE=1 SV=2	6406	1	0	SEMG1	CT103 SEMG SGI dJ172H20.2	protein-coding	20q13.12	semenogelin 1 ||| Semenogelin-1	.	12.8113	13.7758	17.6001	13.8049	13.6298	13.6072	13.2199	14.5105	13.6165	13.7359	3.38446	-0.410744
sp|P02795|MT2_HUMAN;sp|P04731|MT1A_HUMAN;sp|P13640|MT1G_HUMAN;sp|P80294|MT1H_HUMAN;sp|P80297|MT1X_HUMAN	sp|P02795|MT2_HUMAN;sp|P80297|MT1X_HUMAN;sp|P13640|MT1G_HUMAN;sp|P80294|MT1H_HUMAN;sp|P04731|MT1A_HUMAN	sp|P02795|MT2_HUMAN;sp|P04731|MT1A_HUMAN;sp|P13640|MT1G_HUMAN;sp|P80294|MT1H_HUMAN;sp|P80297|MT1X_HUMAN	__Other	sp|P02795|MT2_HUMAN;sp|P13640|MT1G_HUMAN;sp|P80297|MT1X_HUMAN	5;3;3;1;1	5;3;3;1;1	2;1;1;1;1	5	5	5	2	83.6	83.6	45.9	6.0422	61	61;61;62;61;61	0	37.418				1290	0	0	0	MT1A_HUMAN P04731 MT1G_HUMAN P13640 MT1H_HUMAN P80294 MT1X_HUMAN P80297 MT2_HUMAN P02795	sp|P02795|MT2_HUMAN Metallothionein-2 OS=Homo sapiens OX=9606 GN=MT2A PE=1 SV=1;sp|P80297|MT1X_HUMAN Metallothionein-1X OS=Homo sapiens OX=9606 GN=MT1X PE=1 SV=1;sp|P13640|MT1G_HUMAN Metallothionein-1G OS=Homo sapiens OX=9606 GN=MT1G PE=1 SV=2	4489 4495 4496 4501 4502	5	2	MT1A MT1G MT1H MT1X MT2A	MT-1A MT-IA MT1 MT1S MTC MT1K MT-0 MT-1H MT-IH MT-1l MT-2 MT-II MT2	protein-coding	16q13	metallothionein 1A ||| Metallothionein-1A ||| metallothionein 1G ||| Metallothionein-1G ||| metallothionein 1H ||| Metallothionein-1H ||| metallothionein 1X ||| Metallothionein-1X ||| metallothionein 2A ||| Metallothionein-2	.	18.2608	17.6206	18.2073	18.5164	16.137	14.6883	16.0112	18.316	17.3013	18.2463	1.02929	1.33845
sp|Q8N8U2|CDYL2_HUMAN	sp|Q8N8U2|CDYL2_HUMAN	sp|Q8N8U2|CDYL2_HUMAN	__Other	sp|Q8N8U2|CDYL2_HUMAN	3	3	3	1	3	3	3	6.1	6.1	6.1	56.5	506	506	0	3.5824				5231	0	0	0	CDYL2_HUMAN Q8N8U2	sp|Q8N8U2|CDYL2_HUMAN Chromodomain Y-like protein 2 OS=Homo sapiens OX=9606 GN=CDYL2 PE=1 SV=2	124359	1	0	CDYL2	PCCP1	protein-coding	16q23.2	chromodomain Y like 2 ||| Chromodomain Y-like protein 2	.	12.4568	11.3402	10.7082	12.374	12.886	9.29237	10.0751	9.15352	10.0723	11.7783	-0.0842443	1.58151
sp|P30453|1A34_HUMAN;sp|P30457|1A66_HUMAN	sp|P30453|1A34_HUMAN;sp|P30457|1A66_HUMAN	sp|P30453|1A34_HUMAN;sp|P30457|1A66_HUMAN	__Other	sp|P30453|1A34_HUMAN;sp|P30457|1A66_HUMAN	21;20	5;5	0;0	2	21	5	0	57.8	19.2	0	41.054	365	365;365	0	87.163				2039	0	0	0	---	sp|P30453|1A34_HUMAN HLA class I histocompatibility antigen, A-34 alpha chain OS=Homo sapiens OX=9606 GN=HLA-A PE=1 SV=1;sp|P30457|1A66_HUMAN HLA class I histocompatibility antigen, A-66 alpha chain OS=Homo sapiens OX=9606 GN=HLA-A PE=1 SV=1	---	0	1	---	---	---	---	---	.	15.3598	16.0582	18.0259	16.2366	16.6989	14.2399	14.1831	15.8104	14.2614	14.8653	2.48568	0.69644
sp|P19075|TSN8_HUMAN	sp|P19075|TSN8_HUMAN	sp|P19075|TSN8_HUMAN	__Other	sp|P19075|TSN8_HUMAN	4	4	4	1	4	4	4	25.7	25.7	25.7	26.044	237	237	0	108.7				1771	0	0	0	TSN8_HUMAN P19075	sp|P19075|TSN8_HUMAN Tetraspanin-8 OS=Homo sapiens OX=9606 GN=TSPAN8 PE=1 SV=1	7103	1	0	TSPAN8	CO-029 TM4SF3	protein-coding	12q21.1	tetraspanin 8 ||| Tetraspanin-8	.	13.8823	15.3044	15.0411	13.3971	17.4795	15.1509	13.6771	13.6059	13.3727	14.6654	0.492384	-1.15161
sp|P09467|F16P1_HUMAN	sp|P09467|F16P1_HUMAN	sp|P09467|F16P1_HUMAN	__Other	sp|P09467|F16P1_HUMAN	4	4	4	1	4	4	4	16.3	16.3	16.3	36.842	338	338	0	9.726				1469	0	0	0	F16P1_HUMAN P09467	sp|P09467|F16P1_HUMAN Fructose-1,6-bisphosphatase 1 OS=Homo sapiens OX=9606 GN=FBP1 PE=1 SV=5	2203	1	0	FBP1	FBP	protein-coding	9q22.32	fructose-bisphosphatase 1 ||| Fructose-1,6-bisphosphatase 1	.	13.5001	12.2842	11.5323	14.492	11.2396	10.4786	10.2747	12.1491	10.9049	10.4107	0.0970714	3.05681
sp|P30493|1B55_HUMAN;sp|Q29940|1B59_HUMAN	sp|P30493|1B55_HUMAN;sp|Q29940|1B59_HUMAN	sp|P30493|1B55_HUMAN;sp|Q29940|1B59_HUMAN	__Other	sp|P30493|1B55_HUMAN;sp|Q29940|1B59_HUMAN	16;15	1;0	0;0	2	16	1	0	49.4	3	0	40.496	362	362;362	0.006043	1.3366				2044	0	0	0	---	sp|P30493|1B55_HUMAN HLA class I histocompatibility antigen, B-55 alpha chain OS=Homo sapiens OX=9606 GN=HLA-B PE=1 SV=1;sp|Q29940|1B59_HUMAN HLA class I histocompatibility antigen, B-59 alpha chain OS=Homo sapiens OX=9606 GN=HLA-B PE=1 SV=1	---	0	1	---	---	---	---	---	.		10.4014	10.0016	10.271	11.5185	9.62346	8.40484	9.80792	8.27588	12.273	-0.0204197	0.248928
sp|P30047|GFRP_HUMAN	sp|P30047|GFRP_HUMAN	sp|P30047|GFRP_HUMAN	__Other	sp|P30047|GFRP_HUMAN	1	1	1	1	1	1	1	9.5	9.5	9.5	9.6981	84	84	0.0075521	1.1786				2019	0	0	0	GFRP_HUMAN P30047	sp|P30047|GFRP_HUMAN GTP cyclohydrolase 1 feedback regulatory protein OS=Homo sapiens OX=9606 GN=GCHFR PE=1 SV=3	2644	1	0	GCHFR	GFRP HsT16933 P35	protein-coding	15q15.1	GTP cyclohydrolase I feedback regulator ||| GTP cyclohydrolase 1 feedback regulatory protein	.	11.4481	11.9552	10.5463	11.4374	11.5172	12.0512	12.8969	13.7061	10.7311	9.37848	-0.986827	-0.0957107
sp|Q04695|K1C17_HUMAN;CON__Q04695	sp|Q04695|K1C17_HUMAN;CON__Q04695	sp|Q04695|K1C17_HUMAN;CON__Q04695	__Other	sp|Q04695|K1C17_HUMAN;CON__Q04695	45;45	35;35	7;7	2	45	35	7	88.2	79.9	26.9	48.105	432	432;432	0	323.31			+	45	2	0	0	K1C17_HUMAN Q04695	sp|Q04695|K1C17_HUMAN Keratin, type I cytoskeletal 17 OS=Homo sapiens OX=9606 GN=KRT17 PE=1 SV=2;	3872	1	0	KRT17	39.1 CK-17 K17 PC PC2 PCHC1	protein-coding	17q21.2	keratin 17 ||| Keratin, type I cytoskeletal 17	.	18.7309	19.2622	19.878	18.5298	17.4548	21.4774	17.5597	18.0093	18.6529	17.8982	1.19552	-0.152693
sp|P20827|EFNA1_HUMAN	sp|P20827|EFNA1_HUMAN	sp|P20827|EFNA1_HUMAN	__Other	sp|P20827|EFNA1_HUMAN	2	2	2	1	2	2	2	8.8	8.8	8.8	23.787	205	205	0.0084827	1.1017				1814	0	0	0	EFNA1_HUMAN P20827	sp|P20827|EFNA1_HUMAN Ephrin-A1 OS=Homo sapiens OX=9606 GN=EFNA1 PE=1 SV=2	1942	1	0	EFNA1	B61 ECKLG EFL1 EPLG1 LERK-1 LERK1 TNFAIP4	protein-coding	1q22	ephrin A1 ||| Ephrin-A1	.	12.443	12.2373	10.7744	12.3179	9.87763	13.2486	13.8139	12.8216	11.2862	11.0563	-1.12513	0.418327
sp|P15498|VAV_HUMAN	sp|P15498|VAV_HUMAN	sp|P15498|VAV_HUMAN	__Other	sp|P15498|VAV_HUMAN	1	1	1	1	1	1	1	2	2	2	98.313	845	845	0.0092924	1.0374				1669	0	0	0	VAV_HUMAN P15498	sp|P15498|VAV_HUMAN Proto-oncogene vav OS=Homo sapiens OX=9606 GN=VAV1 PE=1 SV=4	7409	1	0	VAV1	VAV	protein-coding	19p13.3	vav guanine nucleotide exchange factor 1 ||| Proto-oncogene vav	.		8.02065	8.11738	10.6754	7.20069	7.01497	8.04794	10.4658	8.59597	8.79477	-0.496738	2.06133
sp|P02538|K2C6A_HUMAN;sp|P48668|K2C6C_HUMAN;CON__P02538;CON__P48668;CON__Q8VED5	sp|P02538|K2C6A_HUMAN;CON__P02538;sp|P48668|K2C6C_HUMAN;CON__P48668;CON__Q8VED5	sp|P02538|K2C6A_HUMAN;sp|P48668|K2C6C_HUMAN;CON__P02538;CON__P48668;CON__Q8VED5	__Other	sp|P02538|K2C6A_HUMAN;sp|P48668|K2C6C_HUMAN;CON__P02538;CON__P48668	31;31;29;29;9	24;24;22;22;3	2;2;1;1;0	5	31	24	2	48	41.8	4.8	60.044	564	564;564;564;564;531	0	114.5			+	17	2	0	0	K2C6A_HUMAN P02538 K2C6C_HUMAN P48668	sp|P02538|K2C6A_HUMAN Keratin, type II cytoskeletal 6A OS=Homo sapiens OX=9606 GN=KRT6A PE=1 SV=3;;sp|P48668|K2C6C_HUMAN Keratin, type II cytoskeletal 6C OS=Homo sapiens OX=9606 GN=KRT6C PE=1 SV=3;	3853 286887	2	2	KRT6A KRT6C	CK-6C CK-6E CK6A CK6C CK6D K6A K6C K6D KRT6C KRT6D PC3 K6E KRT6E PPKNEFD	protein-coding	12q13.13	keratin 6A ||| Keratin, type II cytoskeletal 6A ||| keratin 6C ||| keratin 6A ||| Keratin, type II cytoskeletal 6C	.	17.0932	18.1721	17.1935	17.4366	16.6482	20.7301	17.2174	16.7676	16.8439	16.8237	-0.264093	-0.0209968
sp|Q9Y616|IRAK3_HUMAN	sp|Q9Y616|IRAK3_HUMAN	sp|Q9Y616|IRAK3_HUMAN	__Other	sp|Q9Y616|IRAK3_HUMAN	2	2	2	1	2	2	2	4.4	4.4	4.4	67.766	596	596	0.0029549	1.8163				8495	0	0	0	IRAK3_HUMAN Q9Y616	sp|Q9Y616|IRAK3_HUMAN Interleukin-1 receptor-associated kinase 3 OS=Homo sapiens OX=9606 GN=IRAK3 PE=1 SV=2	11213	1	0	IRAK3	ASRT5 IRAKM	protein-coding	12q14.3	interleukin 1 receptor associated kinase 3 ||| Interleukin-1 receptor-associated kinase 3	.		10.1754	9.50992	8.57684	11.9913	9.11125	8.50072	8.57765	11.4549	9.96071	-0.200488	-1.13357
sp|P55290|CAD13_HUMAN	sp|P55290|CAD13_HUMAN	sp|P55290|CAD13_HUMAN	__Other	sp|P55290|CAD13_HUMAN	11	11	11	1	11	11	11	19.4	19.4	19.4	78.286	713	713	0	71.08				2686	0	0	0	CAD13_HUMAN P55290	sp|P55290|CAD13_HUMAN Cadherin-13 OS=Homo sapiens OX=9606 GN=CDH13 PE=1 SV=1	1012	1	0	CDH13	CDHH P105	protein-coding	16q23.3	cadherin 13 ||| Cadherin-13	.		15.6669	14.0816	13.7787	15.1488	13.8551	13.7732	13.8074	14.2827	17.6871	-0.470219	-0.773104
sp|O60487|MPZL2_HUMAN	sp|O60487|MPZL2_HUMAN	sp|O60487|MPZL2_HUMAN	__Other	sp|O60487|MPZL2_HUMAN	3	3	3	1	3	3	3	14.4	14.4	14.4	24.484	215	215	0	6.3301				743	0	0	0	MPZL2_HUMAN O60487	sp|O60487|MPZL2_HUMAN Myelin protein zero-like protein 2 OS=Homo sapiens OX=9606 GN=MPZL2 PE=1 SV=1	10205	1	0	MPZL2	DFNB111 EVA EVA1	protein-coding	11q23.3	myelin protein zero like 2 ||| Myelin protein zero-like protein 2	.	14.5484	13.9956	12.6192	15.1864	12.5539	15.4538	12.6415	14.8129	12.7279	12.3413	-0.922918	1.64427
sp|Q96BJ8|ELMO3_HUMAN	sp|Q96BJ8|ELMO3_HUMAN	sp|Q96BJ8|ELMO3_HUMAN	__Other	sp|Q96BJ8|ELMO3_HUMAN	3	3	3	1	3	3	3	8.3	8.3	8.3	81.466	720	720	0	4.7309				5913	0	0	0	ELMO3_HUMAN Q96BJ8	sp|Q96BJ8|ELMO3_HUMAN Engulfment and cell motility protein 3 OS=Homo sapiens OX=9606 GN=ELMO3 PE=1 SV=3	79767	1	0	ELMO3	CED-12 CED12 ELMO-3	protein-coding	16q22.1	engulfment and cell motility 3 ||| Engulfment and cell motility protein 3	.	12.69	12.0763	10.879	13.3411	10.2389	13.6498	10.943	12.7702	10.8123	10.7724	-0.796824	1.66524
sp|O95810|CAVN2_HUMAN	sp|O95810|CAVN2_HUMAN	sp|O95810|CAVN2_HUMAN	__Other	sp|O95810|CAVN2_HUMAN	20	20	20	1	20	20	20	55.1	55.1	55.1	47.173	425	425	0	163.07				1194	0	0	0	CAVN2_HUMAN O95810	sp|O95810|CAVN2_HUMAN Caveolae-associated protein 2 OS=Homo sapiens OX=9606 GN=CAVIN2 PE=1 SV=3	8436	1	0	CAVIN2	PS-p68 SDPR SDR cavin-2	protein-coding	2q32.3	caveolae associated protein 2 ||| Caveolae-associated protein 2	.	17.9071	17.2891	19.1697	18.3416	17.2645	16.0723	15.4006	16.9146	15.8266	15.8046	2.32036	1.49225
sp|A6NCN2|KR87P_HUMAN;sp|O43790|KRT86_HUMAN;sp|P78385|KRT83_HUMAN;sp|P78386|KRT85_HUMAN;sp|Q14533|KRT81_HUMAN;CON__O43790;CON__P78385;CON__P78386;CON__Q14533;CON__Q61726;CON__Q6NT21	sp|Q14533|KRT81_HUMAN;CON__Q14533;sp|O43790|KRT86_HUMAN;CON__O43790;sp|P78385|KRT83_HUMAN;CON__Q6NT21;CON__P78385;sp|A6NCN2|KR87P_HUMAN;sp|P78386|KRT85_HUMAN;CON__P78386;CON__Q61726	sp|A6NCN2|KR87P_HUMAN;sp|O43790|KRT86_HUMAN;sp|P78385|KRT83_HUMAN;sp|P78386|KRT85_HUMAN;sp|Q14533|KRT81_HUMAN;CON__O43790;CON__P78385;CON__P78386;CON__Q14533;CON__Q61726;CON__Q6NT21	__Other	sp|A6NCN2|KR87P_HUMAN;sp|O43790|KRT86_HUMAN;sp|P78385|KRT83_HUMAN;sp|P78386|KRT85_HUMAN;sp|Q14533|KRT81_HUMAN;CON__O43790;CON__P78385;CON__P78386;CON__Q14533;CON__Q6NT21	19;19;18;18;16;16;16;12;11;11;8	17;17;16;16;14;14;14;12;9;9;6	15;15;14;14;12;12;12;11;7;7;5	11	19	17	15	30.7	28.9	25	54.928	505	505;505;486;486;493;493;493;255;507;507;479	0	148.63			+	49	2	0	0	KRT81_HUMAN Q14533 KRT83_HUMAN P78385 KRT85_HUMAN P78386 KRT86_HUMAN O43790 KR87P_HUMAN A6NCN2	sp|Q14533|KRT81_HUMAN Keratin, type II cuticular Hb1 OS=Homo sapiens OX=9606 GN=KRT81 PE=1 SV=3;;sp|O43790|KRT86_HUMAN Keratin, type II cuticular Hb6 OS=Homo sapiens OX=9606 GN=KRT86 PE=1 SV=1;;sp|P78385|KRT83_HUMAN Keratin, type II cuticular Hb3 OS=Homo s	3887 3889 3891 3892 85349	5	2	KRT81 KRT83 KRT85 KRT86 KRT87P	HB1 Hb-1 KRTHB1 MLN137 ghHkb1 hHAKB2-1 EKVP5 HB3 Hb-3 KRTHB3 MNLIX ECTD4 HB5 Hb-5 K85 KRTHB5 hHb5 HB6 Hb1 K86 KRTHB6 MNX HBD KRT121P KRTHBP4 psihHbD	protein-coding|pseudo	12q13.13	keratin 81 ||| Keratin, type II cuticular Hb1 ||| keratin 83 ||| Keratin, type II cuticular Hb3 ||| keratin 85 ||| Keratin, type II cuticular Hb5 ||| keratin 86 ||| Keratin, type II cuticular Hb6 ||| keratin 87 pseudogene ||| Putative keratin-87 protein	.	17.0772	17.4076	15.8318	16.4553	15.8194	18.7811	15.6904	16.0586	18.9949	16.7613	-0.967324	-0.343827
sp|Q5EG05|CAR16_HUMAN	sp|Q5EG05|CAR16_HUMAN	sp|Q5EG05|CAR16_HUMAN	__Other	sp|Q5EG05|CAR16_HUMAN	2	1	1	1	2	1	1	9.1	4.6	4.6	22.625	197	197	0.00038071	2.613				4075	0	0	0	CAR16_HUMAN Q5EG05	sp|Q5EG05|CAR16_HUMAN Caspase recruitment domain-containing protein 16 OS=Homo sapiens OX=9606 GN=CARD16 PE=1 SV=1	114769	1	0	CARD16	COP COP1 PSEUDO-ICE	protein-coding	11q22.3	caspase recruitment domain family member 16 ||| Caspase recruitment domain-containing protein 16	.	12.2561	12.463	14.3104	10.6725	12.1369	12.0756	10.0648	12.8853	13.0299	12.2719	2.12949	-1.50838
sp|P36952|SPB5_HUMAN	sp|P36952|SPB5_HUMAN	sp|P36952|SPB5_HUMAN	__Other	sp|P36952|SPB5_HUMAN	20	20	20	1	20	20	20	64	64	64	42.1	375	375	0	323.31				2182	0	0	0	SPB5_HUMAN P36952	sp|P36952|SPB5_HUMAN Serpin B5 OS=Homo sapiens OX=9606 GN=SERPINB5 PE=1 SV=2	5268	1	0	SERPINB5	PI5 maspin	protein-coding	18q21.33	serpin family B member 5 ||| Serpin B5	.	18.7759	17.7094	16.1572	19.1979	16.7435	18.7385	16.0405	18.5205	16.3384	16.1743	-1.08163	1.95902
sp|Q6XE24|RBMS3_HUMAN	sp|Q6XE24|RBMS3_HUMAN	sp|Q6XE24|RBMS3_HUMAN	__Other	sp|Q6XE24|RBMS3_HUMAN	4	1	1	1	4	1	1	9.2	2.5	2.5	47.839	437	437	0	3.4607				4538	0	0	0	RBMS3_HUMAN Q6XE24	sp|Q6XE24|RBMS3_HUMAN RNA-binding motif, single-stranded-interacting protein 3 OS=Homo sapiens OX=9606 GN=RBMS3 PE=1 SV=1	27303	1	0	RBMS3	---	protein-coding	3p24.1	RNA binding motif single stranded interacting protein 3 ||| RNA-binding motif, single-stranded-interacting protein 3	.	12.5233	12.4281	14.3721	11.7319	12.9774	10.542	10.7517	11.6049	11.1079	13.0889	2.35	-0.290188
sp|A1L429|GG12C_HUMAN;sp|A6NDE8|GG12H_HUMAN;sp|A6NER3|GG12J_HUMAN;sp|Q13066|GAG2B_HUMAN;sp|Q4V321|GAG13_HUMAN;sp|Q6NT46|GAG2A_HUMAN;sp|Q9UEU5|GGE2D_HUMAN	sp|Q4V321|GAG13_HUMAN;sp|Q9UEU5|GGE2D_HUMAN;sp|Q6NT46|GAG2A_HUMAN;sp|Q13066|GAG2B_HUMAN;sp|A6NER3|GG12J_HUMAN;sp|A6NDE8|GG12H_HUMAN;sp|A1L429|GG12C_HUMAN	sp|A1L429|GG12C_HUMAN;sp|A6NDE8|GG12H_HUMAN;sp|A6NER3|GG12J_HUMAN;sp|Q13066|GAG2B_HUMAN;sp|Q4V321|GAG13_HUMAN;sp|Q6NT46|GAG2A_HUMAN;sp|Q9UEU5|GGE2D_HUMAN	__Other	sp|A1L429|GG12C_HUMAN;sp|A6NDE8|GG12H_HUMAN;sp|A6NER3|GG12J_HUMAN;sp|Q13066|GAG2B_HUMAN;sp|Q4V321|GAG13_HUMAN;sp|Q6NT46|GAG2A_HUMAN;sp|Q9UEU5|GGE2D_HUMAN	2;1;1;1;1;1;1	1;1;1;1;0;0;0	1;1;1;1;0;0;0	7	2	1	1	36.8	29.1	29.1	12.957	117	117;116;116;116;117;117;117	0	24.712				3998	0	0	0	GG12C_HUMAN A1L429 GG12H_HUMAN A6NDE8 GG12J_HUMAN A6NER3 GAG13_HUMAN Q4V321 GAG2A_HUMAN Q6NT46 GAG2B_HUMAN Q13066 GGE2D_HUMAN Q9UEU5	sp|Q4V321|GAG13_HUMAN G antigen 13 OS=Homo sapiens OX=9606 GN=GAGE13 PE=3 SV=2;sp|Q9UEU5|GGE2D_HUMAN G antigen 2D OS=Homo sapiens OX=9606 GN=GAGE2D PE=1 SV=1;sp|Q6NT46|GAG2A_HUMAN G antigen 2A OS=Homo sapiens OX=9606 GN=GAGE2A PE=1 SV=1;sp|Q13066|GAG2B_HUM	729428 729422 100132399 729431 729442 729396 645051 729447 645037 2574 729408 26749 100101629	13	2	GAGE12B GAGE12C GAGE12D GAGE12E GAGE12H GAGE12J GAGE13 GAGE2A GAGE2B GAGE2C GAGE2D GAGE2E GAGE8	GAGE-12B GAGE11 GAGE-12A GAGE-13 GAGE12A CT4.2 GAGE-2 GAGE-2A GAGE2 GAGE-2B GAGE-2C CT4.8 GAGE-2D GAGE-8 GAGE8 GAGE-2E	protein-coding	Xp11.23!Xp11	G antigen 12B ||| G antigen 12C ||| G antigen 12D ||| G antigen 12E ||| G antigen 12B/C/D/E ||| G antigen 12H ||| G antigen 12J ||| G antigen 13 ||| G antigen 2A ||| G antigen 2B ||| G antigen 2C ||| G antigen 2A ||| G antigen 2B/2C ||| G antigen 2D ||| G antigen 2E ||| G antigen 8	.		9.8052	9.24502	9.47059	7.643	7.56205	9.43019	11.7783	9.38762	8.50935	0.116762	0.342329
sp|O15119|TBX3_HUMAN	sp|O15119|TBX3_HUMAN	sp|O15119|TBX3_HUMAN	__Other	sp|O15119|TBX3_HUMAN	1	1	1	1	1	1	1	1.6	1.6	1.6	79.388	743	743	0.0096337	0.99605				491	0	0	0	TBX3_HUMAN O15119	sp|O15119|TBX3_HUMAN T-box transcription factor TBX3 OS=Homo sapiens OX=9606 GN=TBX3 PE=1 SV=4	6926	1	0	TBX3	TBX3-ISO UMS XHL	protein-coding	12q24.21	T-box transcription factor 3 ||| T-box transcription factor TBX3	.		10.5789	8.74004	8.08274	10.1606	9.84175	10.4766	8.83655	8.96382	12.2748	-0.93207	-1.58937
sp|Q9HCY8|S10AE_HUMAN	sp|Q9HCY8|S10AE_HUMAN	sp|Q9HCY8|S10AE_HUMAN	__Other	sp|Q9HCY8|S10AE_HUMAN	9	9	9	1	9	9	9	84.6	84.6	84.6	11.662	104	104	0	104.76				7275	0	0	0	S10AE_HUMAN Q9HCY8	sp|Q9HCY8|S10AE_HUMAN Protein S100-A14 OS=Homo sapiens OX=9606 GN=S100A14 PE=1 SV=1	57402	1	0	S100A14	BCMP84 S100A15	protein-coding	1q21.3	S100 calcium binding protein A14 ||| Protein S100-A14	.	17.3809	17.4958	16.3605	17.7097	16.215	19.8041	16.2146	16.0703	16.1242	16.2347	-0.481137	0.868064
sp|P53985|MOT1_HUMAN	sp|P53985|MOT1_HUMAN	sp|P53985|MOT1_HUMAN	__Other	sp|P53985|MOT1_HUMAN	9	9	9	1	9	9	9	18.6	18.6	18.6	53.944	500	500	0	90.746				2623	0	0	0	MOT1_HUMAN P53985	sp|P53985|MOT1_HUMAN Monocarboxylate transporter 1 OS=Homo sapiens OX=9606 GN=SLC16A1 PE=1 SV=3	6566	1	0	SLC16A1	HHF7 MCT MCT1 MCT1D	protein-coding	1p13.2	solute carrier family 16 member 1 ||| Monocarboxylate transporter 1	.	14.1268	15.932	14.9426	13.7452	16.0118	15.1315	17.1662	14.3231	17.444	14.9895	-0.526676	-1.72407
sp|P42229|STA5A_HUMAN	sp|P42229|STA5A_HUMAN	sp|P42229|STA5A_HUMAN	__Other	sp|P42229|STA5A_HUMAN	11	1	1	1	11	1	1	16	2	2	90.646	794	794	0	4.5765				2265	0	0	0	STA5A_HUMAN P42229	sp|P42229|STA5A_HUMAN Signal transducer and activator of transcription 5A OS=Homo sapiens OX=9606 GN=STAT5A PE=1 SV=1	6776	1	0	STAT5A	MGF STAT5	protein-coding	17q21.2	signal transducer and activator of transcription 5A	.		8.8947	8.32819	6.74438	9.4709	7.96116	6.7039		10.1941	9.63887	-0.106311	-1.69012
sp|Q6NW40|RGMB_HUMAN	sp|Q6NW40|RGMB_HUMAN	sp|Q6NW40|RGMB_HUMAN	__Other	sp|Q6NW40|RGMB_HUMAN	1	1	1	1	1	1	1	1.8	1.8	1.8	47.546	437	437	0.0029509	1.7845				4384	0	0	0	RGMB_HUMAN Q6NW40	sp|Q6NW40|RGMB_HUMAN RGM domain family member B OS=Homo sapiens OX=9606 GN=RGMB PE=1 SV=3	285704	1	0	RGMB	DRAGON	protein-coding	5q15	repulsive guidance molecule BMP co-receptor b ||| RGM domain family member B	.		11.2072	12.8763	9.73569	9.75575	9.75024	8.93725	10.2068	10.3137	11.9069	2.44093	-0.699635
sp|Q9C010|IPKB_HUMAN	sp|Q9C010|IPKB_HUMAN	sp|Q9C010|IPKB_HUMAN	__Other	sp|Q9C010|IPKB_HUMAN	2	1	1	1	2	1	1	26.9	17.9	17.9	8.4682	78	78	0	4.5617				6830	0	0	0	IPKB_HUMAN Q9C010	sp|Q9C010|IPKB_HUMAN cAMP-dependent protein kinase inhibitor beta OS=Homo sapiens OX=9606 GN=PKIB PE=3 SV=1	5570	1	0	PKIB	PRKACN2	protein-coding	6q22.31	cAMP-dependent protein kinase inhibitor beta	.		12.1577	10.8839	12.6768	10.5865	13.462	10.8998	13.3922	10.9797	10.3485	-0.769811	1.02318
sp|P0DPH7|TBA3C_HUMAN;sp|P0DPH8|TBA3D_HUMAN;sp|Q6PEY2|TBA3E_HUMAN	sp|P0DPH8|TBA3D_HUMAN;sp|P0DPH7|TBA3C_HUMAN;sp|Q6PEY2|TBA3E_HUMAN	sp|P0DPH7|TBA3C_HUMAN;sp|P0DPH8|TBA3D_HUMAN;sp|Q6PEY2|TBA3E_HUMAN	__Other	sp|P0DPH7|TBA3C_HUMAN;sp|P0DPH8|TBA3D_HUMAN;sp|Q6PEY2|TBA3E_HUMAN	21;21;15	1;1;1	0;0;0	3	21	1	0	54	1.8	0	49.959	450	450;450;450	1	-2	+			1515	0	0	0	TBA3C_HUMAN P0DPH7 TBA3D_HUMAN P0DPH8 TBA3E_HUMAN Q6PEY2	sp|P0DPH8|TBA3D_HUMAN Tubulin alpha-3D chain OS=Homo sapiens OX=9606 GN=TUBA3D PE=1 SV=1;sp|P0DPH7|TBA3C_HUMAN Tubulin alpha-3C chain OS=Homo sapiens OX=9606 GN=TUBA3C PE=1 SV=1;sp|Q6PEY2|TBA3E_HUMAN Tubulin alpha-3E chain OS=Homo sapiens OX=9606 GN=TUBA3E	7278 113457 112714	3	5	TUBA3C TUBA3D TUBA3E	TUBA2 bA408E5.3 H2-ALPHA KTCN9	protein-coding	13q12.11!2q21.1	tubulin alpha 3c ||| Tubulin alpha-3C chain ||| tubulin alpha 3d ||| Tubulin alpha-3D chain ||| tubulin alpha 3e ||| Tubulin alpha-3E chain	.	12.9355	12.0634	12.435	13.3823	14.0369	10.857	10.9363	11.7636	10.6054	10.8808	0.572869	1.52015
sp|Q9BX67|JAM3_HUMAN	sp|Q9BX67|JAM3_HUMAN	sp|Q9BX67|JAM3_HUMAN	__Other	sp|Q9BX67|JAM3_HUMAN	5	5	5	1	5	5	5	24.8	24.8	24.8	35.02	310	310	0	30.713				6734	0	0	0	JAM3_HUMAN Q9BX67	sp|Q9BX67|JAM3_HUMAN Junctional adhesion molecule C OS=Homo sapiens OX=9606 GN=JAM3 PE=1 SV=1	83700	1	0	JAM3	JAM-2 JAM-3 JAM-C JAMC	protein-coding	11q25	junctional adhesion molecule 3 ||| Junctional adhesion molecule C	.		13.8657	12.3523	11.9896	13.1866	12.8663	15.1909	12.1707	12.3853	15.1491	-0.80901	-1.17172
sp|Q6P4A8|PLBL1_HUMAN	sp|Q6P4A8|PLBL1_HUMAN	sp|Q6P4A8|PLBL1_HUMAN	__Other	sp|Q6P4A8|PLBL1_HUMAN	3	3	3	1	3	3	3	6.1	6.1	6.1	63.254	553	553	0	4.6606				4426	0	0	0	PLBL1_HUMAN Q6P4A8	sp|Q6P4A8|PLBL1_HUMAN Phospholipase B-like 1 OS=Homo sapiens OX=9606 GN=PLBD1 PE=1 SV=2	79887	1	0	PLBD1	---	protein-coding	12p13.1	phospholipase B domain containing 1 ||| Phospholipase B-like 1	.		13.1026	12.988	11.4543	15.3369	11.4375	12.9742	11.8317	11.8598	12.9345	0.385893	-1.14781
sp|P31327|CPSM_HUMAN	sp|P31327|CPSM_HUMAN	sp|P31327|CPSM_HUMAN	__Other	sp|P31327|CPSM_HUMAN	63	59	59	1	63	59	59	52.9	50.9	50.9	164.94	1500	1500	0	323.31				2068	0	0	0	CPSM_HUMAN P31327	sp|P31327|CPSM_HUMAN Carbamoyl-phosphate synthase [ammonia], mitochondrial OS=Homo sapiens OX=9606 GN=CPS1 PE=1 SV=2	1373	1	0	CPS1	CPSASE1 PHN	protein-coding	2q34	carbamoyl-phosphate synthase 1 ||| Carbamoyl-phosphate synthase [ammonia], mitochondrial	.	18.6565	19.2206	18.0732	18.759	18.0589	21.6426	17.9779	18.0839	17.8195	17.8159	-0.455621	0.230136
sp|P05109|S10A8_HUMAN	sp|P05109|S10A8_HUMAN	sp|P05109|S10A8_HUMAN	__Other	sp|P05109|S10A8_HUMAN	4	4	4	1	4	4	4	32.3	32.3	32.3	10.834	93	93	0	6.5447				1343	0	0	0	S10A8_HUMAN P05109	sp|P05109|S10A8_HUMAN Protein S100-A8 OS=Homo sapiens OX=9606 GN=S100A8 PE=1 SV=1	6279	1	0	S100A8	60B8AG CAGA CFAG CGLA CP-10 L1Ag MA387 MIF MRP8 NIF P8	protein-coding	1q21.3	S100 calcium binding protein A8 ||| Protein S100-A8	.	14.7046	15.0087	13.7923	14.6048	13.4804	17.3492	13.8424	13.6583	13.6362	13.7563	-0.472678	0.339827
sp|P52566|GDIR2_HUMAN	sp|P52566|GDIR2_HUMAN	sp|P52566|GDIR2_HUMAN	__Other	sp|P52566|GDIR2_HUMAN	11	11	11	1	11	11	11	64.2	64.2	64.2	22.988	201	201	0	176.48				2568	0	0	0	GDIR2_HUMAN P52566	sp|P52566|GDIR2_HUMAN Rho GDP-dissociation inhibitor 2 OS=Homo sapiens OX=9606 GN=ARHGDIB PE=1 SV=3	397	1	0	ARHGDIB	D4 GDIA2 GDID4 LYGDI Ly-GDI RAP1GN1 RhoGDI2	protein-coding	12p12.3	Rho GDP dissociation inhibitor beta ||| Rho GDP-dissociation inhibitor 2	.	17.2966	16.5348	17.0232	17.6376	14.7528	15.2146	14.8595	17.8423	15.2954	16.9175	0.830326	1.44478
sp|O43278|SPIT1_HUMAN	sp|O43278|SPIT1_HUMAN	sp|O43278|SPIT1_HUMAN	__Other	sp|O43278|SPIT1_HUMAN	19	19	19	1	19	19	19	34.4	34.4	34.4	58.397	529	529	0	68.898				593	0	0	0	SPIT1_HUMAN O43278	sp|O43278|SPIT1_HUMAN Kunitz-type protease inhibitor 1 OS=Homo sapiens OX=9606 GN=SPINT1 PE=1 SV=2	6692	1	0	SPINT1	HAI HAI1 MANSC2	protein-coding	15q15.1	serine peptidase inhibitor, Kunitz type 1 ||| Kunitz-type protease inhibitor 1	.	18.4388	17.6449	16.3241	18.9161	16.1949	18.1519	16.0131	19.0897	16.3697	16.6506	-0.889638	1.70234
REV__sp|P16402|H13_HUMAN;REV__sp|P16402|H13_HUMAN	sp|P16402|H13_HUMAN;REV__sp|P16402|H13_HUMAN	REV__sp|P16402|H13_HUMAN;REV__sp|P16402|H13_HUMAN	__REV	REV__sp|P16402|H13_HUMAN	17;1	6;1	6;1	2	17	6	6	47.5	19	19	22.35	221	221;221	0	6.2954				1700	0	0	0	H13_HUMAN P16402	sp|P16402|H13_HUMAN Histone H1.3 OS=Homo sapiens OX=9606 GN=HIST1H1D PE=1 SV=2	3007	1	0	H1-3	H1.3 H1D H1F3 H1s-2 HIST1H1D	protein-coding	6p22.2	H1.3 linker histone, cluster member ||| Histone H1.3	.	14.6249	15.8913	15.8667	14.489	15.3672	15.0214	18.0014	13.6	14.9317	15.8237	0.479041	-0.898635
sp|P20930|FILA_HUMAN;CON__P20930	sp|P20930|FILA_HUMAN;CON__P20930	sp|P20930|FILA_HUMAN;CON__P20930	__Other	sp|P20930|FILA_HUMAN;CON__P20930	25;25	25;25	25;25	2	25	25	25	12.9	12.9	12.9	435.16	4061	4061;4061	0	107.17			+	37	2	0	0	FILA_HUMAN P20930	sp|P20930|FILA_HUMAN Filaggrin OS=Homo sapiens OX=9606 GN=FLG PE=1 SV=3;	2312	1	0	FLG	ATOD2	protein-coding	1q21.3	filaggrin	.	15.0926	15.8174	18.2563	14.5505	14.593	14.4372	14.7	15.2651	14.5622	14.7574	3.11608	-0.589697
sp|Q6NXG1|ESRP1_HUMAN	sp|Q6NXG1|ESRP1_HUMAN	sp|Q6NXG1|ESRP1_HUMAN	__Other	sp|Q6NXG1|ESRP1_HUMAN	17	17	16	1	17	17	16	35.2	35.2	33.5	75.585	681	681	0	168.15				4387	0	0	0	ESRP1_HUMAN Q6NXG1	sp|Q6NXG1|ESRP1_HUMAN Epithelial splicing regulatory protein 1 OS=Homo sapiens OX=9606 GN=ESRP1 PE=1 SV=2	54845	1	0	ESRP1	DFNB109 RBM35A RMB35A	protein-coding	8q22.1	epithelial splicing regulatory protein 1	.	17.41	16.5623	15.3505	17.8585	15.2805	17.517	15.1308	17.7483	15.4107	15.0898	-0.822785	1.68524
sp|P08779|K1C16_HUMAN;sp|P35900|K1C20_HUMAN;CON__P08779;CON__P35900;CON__Q3ZAW8;CON__Q9D312;CON__Q9Z2K1	sp|P08779|K1C16_HUMAN;CON__P08779;CON__Q9Z2K1;CON__Q3ZAW8;sp|P35900|K1C20_HUMAN;CON__P35900;CON__Q9D312	sp|P08779|K1C16_HUMAN;sp|P35900|K1C20_HUMAN;CON__P08779;CON__P35900;CON__Q3ZAW8;CON__Q9D312;CON__Q9Z2K1	__Other	sp|P08779|K1C16_HUMAN;CON__P08779	21;21;9;9;4;4;4	4;4;0;0;0;0;0	4;4;0;0;0;0;0	7	21	4	4	37.6	11.8	11.8	51.267	473	473;473;469;474;424;424;431	0	19.72			+	30	2	0	0	K1C16_HUMAN P08779 K1C20_HUMAN P35900	sp|P08779|K1C16_HUMAN Keratin, type I cytoskeletal 16 OS=Homo sapiens OX=9606 GN=KRT16 PE=1 SV=4;	3868 54474	2	2	KRT16 KRT20	CK16 FNEPPK K16 K1CP KRT16A NEPPK PC1 CD20 CK-20 CK20 K20 KRT21	protein-coding	17q21.2	keratin 16 ||| Keratin, type I cytoskeletal 16 ||| keratin 20 ||| Keratin, type I cytoskeletal 20	.	11.9112	12.5885	13.4926	12.6666	12.0749	15.408	11.9124	11.8076	11.8623	11.7386	0.872196	0.0462498
sp|Q6IA17|SIGIR_HUMAN	sp|Q6IA17|SIGIR_HUMAN	sp|Q6IA17|SIGIR_HUMAN	__Other	sp|Q6IA17|SIGIR_HUMAN	2	2	2	1	2	2	2	5.6	5.6	5.6	45.679	410	410	0	10.638				4337	0	0	0	SIGIR_HUMAN Q6IA17	sp|Q6IA17|SIGIR_HUMAN Single Ig IL-1-related receptor OS=Homo sapiens OX=9606 GN=SIGIRR PE=1 SV=3	59307	1	0	SIGIRR	IL-1R8 TIR8	protein-coding	11p15.5	single Ig and TIR domain containing ||| Single Ig IL-1-related receptor	.	12.6377	12.3476	11.0538	13.7958	11.1841	13.8183	11.1873	13.1413	11.2854	11.0956	-1.01636	1.72559
sp|P04439|1A03_HUMAN	sp|P04439|1A03_HUMAN	sp|P04439|1A03_HUMAN	__Other	sp|P04439|1A03_HUMAN	24	8	3	1	24	8	3	58.9	24.1	6.8	40.84	365	365	0	207.21				1323	0	0	0	P04439	sp|P04439|1A03_HUMAN HLA class I histocompatibility antigen, A-3 alpha chain OS=Homo sapiens OX=9606 GN=HLA-A PE=1 SV=2	3105	1	0	HLA-A	HLAA	protein-coding	6p22.1	major histocompatibility complex, class I, A ||| HLA class I histocompatibility antigen, A alpha chain	.	14.3258	16.3405	15.0152	14.897	14.4984	16.8378	15.0036	18.0463	15.1459	16.8025	-0.765627	-0.883807
sp|Q13753|LAMC2_HUMAN	sp|Q13753|LAMC2_HUMAN	sp|Q13753|LAMC2_HUMAN	__Other	sp|Q13753|LAMC2_HUMAN	40	40	40	1	40	40	40	37.3	37.3	37.3	130.97	1193	1193	0	116.69				3459	0	0	0	LAMC2_HUMAN Q13753	sp|Q13753|LAMC2_HUMAN Laminin subunit gamma-2 OS=Homo sapiens OX=9606 GN=LAMC2 PE=1 SV=2	3918	1	0	LAMC2	B2T BM600 CSF EBR2 EBR2A LAMB2T LAMNB2	protein-coding	1q25.3	laminin subunit gamma 2 ||| Laminin subunit gamma-2	.	18.5503	17.5796	16.5816	18.7997	16.2437	17.0376	16.1499	19.4448	16.6991	16.2055	-0.563676	1.65446
sp|Q14451|GRB7_HUMAN	sp|Q14451|GRB7_HUMAN	sp|Q14451|GRB7_HUMAN	__Other	sp|Q14451|GRB7_HUMAN	3	3	3	1	3	3	3	7.1	7.1	7.1	59.68	532	532	0	5.9258				3556	0	0	0	GRB7_HUMAN Q14451	sp|Q14451|GRB7_HUMAN Growth factor receptor-bound protein 7 OS=Homo sapiens OX=9606 GN=GRB7 PE=1 SV=2	2886	1	0	GRB7	---	protein-coding	17q12	growth factor receptor bound protein 7 ||| Growth factor receptor-bound protein 7	.		10.3579	8.86113	11.8358	8.29061	10.6711	9.61648	11.4317	9.20238	9.35688	-1.04712	1.92751
sp|P48506|GSH1_HUMAN	sp|P48506|GSH1_HUMAN	sp|P48506|GSH1_HUMAN	__Other	sp|P48506|GSH1_HUMAN	32	31	31	1	32	31	31	54.3	53.2	53.2	72.765	637	637	0	323.31				2373	0	0	0	GSH1_HUMAN P48506	sp|P48506|GSH1_HUMAN Glutamate--cysteine ligase catalytic subunit OS=Homo sapiens OX=9606 GN=GCLC PE=1 SV=2	2729	1	0	GCLC	GCL GCS GLCL GLCLC	protein-coding	6p12.1	glutamate-cysteine ligase catalytic subunit ||| Glutamate--cysteine ligase catalytic subunit	.	20.6612	18.6509	17.3141	21.118	18.2435	17.893	17.2894	17.5618	17.8173	17.4802	-0.775522	3.02829
sp|P58397|ATS12_HUMAN	sp|P58397|ATS12_HUMAN	sp|P58397|ATS12_HUMAN	__Other	sp|P58397|ATS12_HUMAN	5	5	5	1	5	5	5	2.9	2.9	2.9	177.67	1594	1594	0	14.555				2741	0	0	0	ATS12_HUMAN P58397	sp|P58397|ATS12_HUMAN A disintegrin and metalloproteinase with thrombospondin motifs 12 OS=Homo sapiens OX=9606 GN=ADAMTS12 PE=1 SV=2	81792	1	0	ADAMTS12	PRO4389	protein-coding	5p13.3-p13.2	ADAM metallopeptidase with thrombospondin type 1 motif 12 ||| A disintegrin and metalloproteinase with thrombospondin motifs 12	.		13.0078	14.1565	11.3596	13.7027	11.3866	11.3861	11.9523	12.058	14.1533	1.63708	-1.15981
sp|P43699|NKX21_HUMAN;sp|P52952|NKX25_HUMAN;sp|Q9H2Z4|NKX24_HUMAN	sp|P43699|NKX21_HUMAN;sp|P52952|NKX25_HUMAN;sp|Q9H2Z4|NKX24_HUMAN	sp|P43699|NKX21_HUMAN;sp|P52952|NKX25_HUMAN;sp|Q9H2Z4|NKX24_HUMAN	__Other	sp|P43699|NKX21_HUMAN	3;1;1	3;1;1	3;1;1	3	3	3	3	18.9	18.9	18.9	38.596	371	371;324;354	0	29.999				2310	0	0	0	NKX21_HUMAN P43699 NKX24_HUMAN Q9H2Z4 NKX25_HUMAN P52952	sp|P43699|NKX21_HUMAN Homeobox protein Nkx-2.1 OS=Homo sapiens OX=9606 GN=NKX2-1 PE=1 SV=1	7080 644524 1482	3	5	NKX2-1 NKX2-4 NKX2-5	BCH BHC NK-2 NKX2.1 NKX2A NMTC1 T/EBP TEBP TITF1 TTF-1 TTF1 NKX2.4 NKX2D CHNG5 CSX CSX1 HLHS2 NKX2.5 NKX2E NKX4-1 VSD3	protein-coding	14q13.3!20p11.22!5q35.1	NK2 homeobox 1 ||| Homeobox protein Nkx-2.1 ||| NK2 homeobox 4 ||| Homeobox protein Nkx-2.4 ||| NK2 homeobox 5 ||| Homeobox protein Nkx-2.5	.	13.8462	12.8124	12.1572	14.4513	11.1573	11.6034	11.8821	14.3297	11.7562	11.8335	-0.239145	2.05501
sp|Q96DG6|CMBL_HUMAN	sp|Q96DG6|CMBL_HUMAN	sp|Q96DG6|CMBL_HUMAN	__Other	sp|Q96DG6|CMBL_HUMAN	13	13	13	1	13	13	13	48.2	48.2	48.2	28.048	245	245	0	38.269				5983	0	0	0	CMBL_HUMAN Q96DG6	sp|Q96DG6|CMBL_HUMAN Carboxymethylenebutenolidase homolog OS=Homo sapiens OX=9606 GN=CMBL PE=1 SV=1	134147	1	0	CMBL	JS-1	protein-coding	5p15.2	carboxymethylenebutenolidase homolog	.	17.8756	16.8929	15.4623	18.349	17.2591	18.0032	16.6461	15.092	16.4824	15.1452	-1.09259	1.79413
sp|Q96N03|VTM2L_HUMAN	sp|Q96N03|VTM2L_HUMAN	sp|Q96N03|VTM2L_HUMAN	__Other	sp|Q96N03|VTM2L_HUMAN	2	2	2	1	2	2	2	10.3	10.3	10.3	22.349	204	204	0	3.6908				6249	0	0	0	VTM2L_HUMAN Q96N03	sp|Q96N03|VTM2L_HUMAN V-set and transmembrane domain-containing protein 2-like protein OS=Homo sapiens OX=9606 GN=VSTM2L PE=1 SV=1	128434	1	0	VSTM2L	C20orf102 dJ1118M15.2	protein-coding	20q11.23	V-set and transmembrane domain containing 2 like ||| V-set and transmembrane domain-containing protein 2-like protein	.	13.0604	12.3893	11.2155	13.8832	12.2154	11.1535	11.9885	13.5706	10.8217	10.4438	-0.69599	1.97165
sp|Q8NBI5|S43A3_HUMAN	sp|Q8NBI5|S43A3_HUMAN	sp|Q8NBI5|S43A3_HUMAN	__Other	sp|Q8NBI5|S43A3_HUMAN	6	6	6	1	6	6	6	10.6	10.6	10.6	54.528	491	491	0	18.754				5271	0	0	0	S43A3_HUMAN Q8NBI5	sp|Q8NBI5|S43A3_HUMAN Solute carrier family 43 member 3 OS=Homo sapiens OX=9606 GN=SLC43A3 PE=1 SV=2	29015	1	0	SLC43A3	EEG1 ENBT1 FOAP-13 PRO1659 SEEEG-1	protein-coding	11q12.1	solute carrier family 43 member 3	.	15.5311	15.3737	15.6872	15.6658	15.7444	13.3571	13.3467	13.8896	16.6282	15.4975	0.710122	0.688745
sp|Q86V59|PNM8A_HUMAN	sp|Q86V59|PNM8A_HUMAN	sp|Q86V59|PNM8A_HUMAN	__Other	sp|Q86V59|PNM8A_HUMAN	1	1	1	1	1	1	1	3	3	3	48.16	439	439	0.0092901	1.028				4825	0	0	0	PNM8A_HUMAN Q86V59	sp|Q86V59|PNM8A_HUMAN Paraneoplastic antigen-like protein 8A OS=Homo sapiens OX=9606 GN=PNMA8A PE=1 SV=2	55228	1	0	PNMA8A	PNMAL1	protein-coding	19q13.32	PNMA family member 8A ||| Paraneoplastic antigen-like protein 8A	.		9.7016	7.94221	8.33728	11.086	9.02866	11.2143	8.70114	8.42393	8.74236	-1.24227	-0.8472
sp|Q14134|TRI29_HUMAN	sp|Q14134|TRI29_HUMAN	sp|Q14134|TRI29_HUMAN	__Other	sp|Q14134|TRI29_HUMAN	24	24	24	1	24	24	24	48.5	48.5	48.5	65.834	588	588	0	67.103				3501	0	0	0	TRI29_HUMAN Q14134	sp|Q14134|TRI29_HUMAN Tripartite motif-containing protein 29 OS=Homo sapiens OX=9606 GN=TRIM29 PE=1 SV=2	23650	1	0	TRIM29	ATDC	protein-coding	11q23.3	tripartite motif containing 29 ||| Tripartite motif-containing protein 29	.	16.7728	17.1619	16.1027	16.6969	15.9395	19.5128	15.9049	15.9283	15.8017	15.9806	-0.380751	0.213452
sp|Q16647|PTGIS_HUMAN	sp|Q16647|PTGIS_HUMAN	sp|Q16647|PTGIS_HUMAN	__Other	sp|Q16647|PTGIS_HUMAN	11	11	11	1	11	11	11	29	29	29	57.103	500	500	0	65.377				3863	0	0	0	PTGIS_HUMAN Q16647	sp|Q16647|PTGIS_HUMAN Prostacyclin synthase OS=Homo sapiens OX=9606 GN=PTGIS PE=1 SV=1	5740	1	0	PTGIS	CYP8 CYP8A1 PGIS PTGI	protein-coding	20q13.13	prostaglandin I2 synthase ||| Prostacyclin synthase	.	13.8498	15.4879	15.8471	14.2651	17.7072	14.2775	14.497	14.2389	14.08	14.5043	0.919946	-0.662042
sp|Q96CT2|KLH29_HUMAN	sp|Q96CT2|KLH29_HUMAN	sp|Q96CT2|KLH29_HUMAN	__Other	sp|Q96CT2|KLH29_HUMAN	1	1	1	1	1	1	1	1.1	1.1	1.1	94.227	875	875	0.008022	1.1519				5960	0	0	0	KLH29_HUMAN Q96CT2	sp|Q96CT2|KLH29_HUMAN Kelch-like protein 29 OS=Homo sapiens OX=9606 GN=KLHL29 PE=1 SV=3	114818	1	0	KLHL29	KBTBD9	protein-coding	2p24.1	kelch like family member 29 ||| Kelch-like protein 29	.		8.92282	9.11573	10.761	9.3369	8.70766	7.77328	6.91342	10.2869	9.37184	0.0823915	1.72763
sp|P00352|AL1A1_HUMAN	sp|P00352|AL1A1_HUMAN	sp|P00352|AL1A1_HUMAN	__Other	sp|P00352|AL1A1_HUMAN	22	18	18	1	22	18	18	49.1	45.5	45.5	54.861	501	501	0	252.7				1238	0	0	0	AL1A1_HUMAN P00352	sp|P00352|AL1A1_HUMAN Retinal dehydrogenase 1 OS=Homo sapiens OX=9606 GN=ALDH1A1 PE=1 SV=2	216	1	0	ALDH1A1	ALDC ALDH-E1 ALDH1 ALDH11 HEL-9 HEL-S-53e HEL12 PUMB1 RALDH1	protein-coding	9q21.13	aldehyde dehydrogenase 1 family member A1 ||| Retinal dehydrogenase 1	.	16.1629	16.704	15.9143	16.0347	17.6	18.6576	15.3464	15.1239	15.4639	15.5631	-0.298652	-0.178263
sp|O43291|SPIT2_HUMAN	sp|O43291|SPIT2_HUMAN	sp|O43291|SPIT2_HUMAN	__Other	sp|O43291|SPIT2_HUMAN	6	6	6	1	6	6	6	27.4	27.4	27.4	28.228	252	252	0	29.678				596	0	0	0	SPIT2_HUMAN O43291	sp|O43291|SPIT2_HUMAN Kunitz-type protease inhibitor 2 OS=Homo sapiens OX=9606 GN=SPINT2 PE=1 SV=2	10653	1	0	SPINT2	DIAR3 HAI-2 HAI2 Kop PB	protein-coding	19q13.2	serine peptidase inhibitor, Kunitz type 2 ||| Kunitz-type protease inhibitor 2	.	16.747	15.7959	14.9825	17.2658	14.1325	16.4059	14.8617	17.0311	15.2703	14.1137	-0.525454	1.75787
sp|P19883|FST_HUMAN	sp|P19883|FST_HUMAN	sp|P19883|FST_HUMAN	__Other	sp|P19883|FST_HUMAN	2	2	2	1	2	2	2	7.8	7.8	7.8	38.007	344	344	0.0060438	1.3381				1794	0	0	0	FST_HUMAN P19883	sp|P19883|FST_HUMAN Follistatin OS=Homo sapiens OX=9606 GN=FST PE=1 SV=2	10468	1	0	FST	FS	protein-coding	5q11.2	follistatin	.		12.4225	14.042	11.1154	11.4761	10.9082	10.8255	11.9071	11.229	13.5729	2.15745	-0.769148
sp|O95427|PIGN_HUMAN	sp|O95427|PIGN_HUMAN	sp|O95427|PIGN_HUMAN	__Other	sp|O95427|PIGN_HUMAN	4	4	4	1	4	4	4	5.9	5.9	5.9	105.81	931	931	0	8.4675				1141	0	0	0	PIGN_HUMAN O95427	sp|O95427|PIGN_HUMAN GPI ethanolamine phosphate transferase 1 OS=Homo sapiens OX=9606 GN=PIGN PE=1 SV=1	23556	1	0	PIGN	MCAHS MCAHS1 MCD4 MDC4 PIG-N	protein-coding	18q21.33	phosphatidylinositol glycan anchor biosynthesis class N ||| GPI ethanolamine phosphate transferase 1	.		10.498	11.0375	9.35632	12.2094	9.64847	8.04423	9.56862	9.59029	9.59973	1.15565	-0.525492
sp|P30443|1A01_HUMAN;sp|P30455|1A36_HUMAN	sp|P30455|1A36_HUMAN;sp|P30443|1A01_HUMAN	sp|P30443|1A01_HUMAN;sp|P30455|1A36_HUMAN	__Other	sp|P30443|1A01_HUMAN;sp|P30455|1A36_HUMAN	21;21	2;2	2;2	2	21	2	2	53.4	5.5	5.5	40.933	365	365;365	0	4.1431				2037	0	0	0	---	sp|P30455|1A36_HUMAN HLA class I histocompatibility antigen, A-36 alpha chain OS=Homo sapiens OX=9606 GN=HLA-A PE=1 SV=1;sp|P30443|1A01_HUMAN HLA class I histocompatibility antigen, A-1 alpha chain OS=Homo sapiens OX=9606 GN=HLA-A PE=1 SV=1	---	0	1	---	---	---	---	---	.	13.327	13.5696	12.4172	13.1288	12.1897	15.9163	12.4675	12.2767	12.4651	12.6389	-0.520341	0.191293
sp|P43355|MAGA1_HUMAN;sp|P43358|MAGA4_HUMAN;sp|P43361|MAGA8_HUMAN	sp|P43358|MAGA4_HUMAN;sp|P43355|MAGA1_HUMAN;sp|P43361|MAGA8_HUMAN	sp|P43355|MAGA1_HUMAN;sp|P43358|MAGA4_HUMAN;sp|P43361|MAGA8_HUMAN	__Other	sp|P43358|MAGA4_HUMAN	13;2;2	13;2;2	10;1;1	3	13	13	10	39.7	39.7	32.2	34.899	317	317;309;318	0	96.442				2304	0	0	0	MAGA1_HUMAN P43355 MAGA4_HUMAN P43358 MAGA8_HUMAN P43361	sp|P43358|MAGA4_HUMAN Melanoma-associated antigen 4 OS=Homo sapiens OX=9606 GN=MAGEA4 PE=1 SV=2	4100 4103 4107	3	2	MAGEA1 MAGEA4 MAGEA8	CT1.1 MAGE1 CT1.4 MAGE-41 MAGE-X2 MAGE4 MAGE4A MAGE4B CT1.8 MAGE8	protein-coding	Xq28	MAGE family member A1 ||| Melanoma-associated antigen 1 ||| MAGE family member A4 ||| Melanoma-associated antigen 4 ||| MAGE family member A8 ||| Melanoma-associated antigen 8	.	16.3646	16.9587	15.5802	15.635	16.3589	16.5453	19.242	15.8948	15.7173	15.7189	-0.756315	-0.701515
sp|Q8IXQ5|KLHL7_HUMAN	sp|Q8IXQ5|KLHL7_HUMAN	sp|Q8IXQ5|KLHL7_HUMAN	__Other	sp|Q8IXQ5|KLHL7_HUMAN	9	9	9	1	9	9	9	26.1	26.1	26.1	65.991	586	586	0	34.184				5012	0	0	0	KLHL7_HUMAN Q8IXQ5	sp|Q8IXQ5|KLHL7_HUMAN Kelch-like protein 7 OS=Homo sapiens OX=9606 GN=KLHL7 PE=1 SV=2	55975	1	0	KLHL7	CISS3 KLHL6 SBBI26	protein-coding	7p15.3	kelch like family member 7 ||| Kelch-like protein 7	.	13.322	16.3452	17.2517	14.3495	16.7343	14.7266	16.9684	14.6083	15.9924	17.0843	1.28728	-1.61493
sp|Q56VL3|OCAD2_HUMAN	sp|Q56VL3|OCAD2_HUMAN	sp|Q56VL3|OCAD2_HUMAN	__Other	sp|Q56VL3|OCAD2_HUMAN	13	13	13	1	13	13	13	64.9	64.9	64.9	16.953	154	154	0	43.218				4053	0	0	0	OCAD2_HUMAN Q56VL3	sp|Q56VL3|OCAD2_HUMAN OCIA domain-containing protein 2 OS=Homo sapiens OX=9606 GN=OCIAD2 PE=1 SV=1	132299	1	0	OCIAD2	---	protein-coding	4p11	OCIA domain containing 2 ||| OCIA domain-containing protein 2	.	17.9664	17.132	16.3688	18.4565	16.7497	16.0652	14.9942	18.674	16.5293	16.5269	-0.426757	1.66094
sp|Q9Y624|JAM1_HUMAN	sp|Q9Y624|JAM1_HUMAN	sp|Q9Y624|JAM1_HUMAN	__Other	sp|Q9Y624|JAM1_HUMAN	13	13	13	1	13	13	13	45.5	45.5	45.5	32.583	299	299	0	114.16				8500	0	0	0	JAM1_HUMAN Q9Y624	sp|Q9Y624|JAM1_HUMAN Junctional adhesion molecule A OS=Homo sapiens OX=9606 GN=F11R PE=1 SV=1	50848	1	0	F11R	CD321 JAM JAM1 JAMA JCAM KAT PAM-1	protein-coding	1q23.3	F11 receptor ||| Junctional adhesion molecule A	.	17.6598	17.1734	16.085	18.3042	15.468	17.9998	16.7571	18.3909	16.3632	15.4937	-0.772733	1.44651
sp|P20337|RAB3B_HUMAN	sp|P20337|RAB3B_HUMAN	sp|P20337|RAB3B_HUMAN	__Other	sp|P20337|RAB3B_HUMAN	8	7	7	1	8	7	7	40.2	36.5	36.5	24.758	219	219	0	62.347				1803	0	0	0	RAB3B_HUMAN P20337	sp|P20337|RAB3B_HUMAN Ras-related protein Rab-3B OS=Homo sapiens OX=9606 GN=RAB3B PE=1 SV=2	5865	1	0	RAB3B	---	protein-coding	1p32.3	RAB3B, member RAS oncogene family ||| Ras-related protein Rab-3B	.		15.6472	16.6483	14.0422	14.2813	13.9927	14.2732	14.4627	15.3452	17.0654	1.6344	-0.971629
sp|P22466|GALA_HUMAN	sp|P22466|GALA_HUMAN	sp|P22466|GALA_HUMAN	__Other	sp|P22466|GALA_HUMAN	1	1	1	1	1	1	1	12.2	12.2	12.2	13.302	123	123	0.0060372	1.3159				1853	0	0	0	GALA_HUMAN P22466	sp|P22466|GALA_HUMAN Galanin peptides OS=Homo sapiens OX=9606 GN=GAL PE=1 SV=3	51083	1	0	GAL	ETL8 GAL-GMAP GALN GLNN GMAP	protein-coding	11q13.2	galanin and GMAP prepropeptide ||| Galanin peptides	.		10.8846	10.102	9.99076	12.7836	11.8003	10.3566	8.9359	10.0195	10.0182	-0.398829	-0.5101
sp|Q9H013|ADA19_HUMAN	sp|Q9H013|ADA19_HUMAN	sp|Q9H013|ADA19_HUMAN	__Other	sp|Q9H013|ADA19_HUMAN	1	1	1	1	1	1	1	1.2	1.2	1.2	105	955	955	0.0033133	1.7284				6890	0	0	0	ADA19_HUMAN Q9H013	sp|Q9H013|ADA19_HUMAN Disintegrin and metalloproteinase domain-containing protein 19 OS=Homo sapiens OX=9606 GN=ADAM19 PE=1 SV=3	8728	1	0	ADAM19	FKSG34 MADDAM MLTNB	protein-coding	5q33.3	ADAM metallopeptidase domain 19 ||| Disintegrin and metalloproteinase domain-containing protein 19	.		10.22	9.78158	9.69842	9.78857	8.38491	8.40262	11.3759	9.9093	11.7444	-0.104137	-0.187299
sp|P17516|AK1C4_HUMAN;sp|P42330|AK1C3_HUMAN	sp|P42330|AK1C3_HUMAN;sp|P17516|AK1C4_HUMAN	sp|P17516|AK1C4_HUMAN;sp|P42330|AK1C3_HUMAN	__Other	sp|P42330|AK1C3_HUMAN	18;7	9;0	9;0	2	18	9	9	69	44.9	44.9	36.853	323	323;323	0	159.72				2267	0	0	0	AK1C3_HUMAN P42330 AK1C4_HUMAN P17516	sp|P42330|AK1C3_HUMAN Aldo-keto reductase family 1 member C3 OS=Homo sapiens OX=9606 GN=AKR1C3 PE=1 SV=4	8644 1109	2	2	AKR1C3 AKR1C4	DD3 DDX HA1753 HAKRB HAKRe HSD17B5 PGFS hluPGFS 3-alpha-HSD C11 CDR CHDR DD-4 DD4 HAKRA	protein-coding	10p15.1	aldo-keto reductase family 1 member C3 ||| aldo-keto reductase family 1 member C4	.	13.9957	15.879	14.8443	15.151	16.5288	17.6931	14.4896	14.4089	16.4442	14.7223	-0.690946	-0.384316
sp|P30447|1A23_HUMAN	sp|P30447|1A23_HUMAN	sp|P30447|1A23_HUMAN	__Other	sp|P30447|1A23_HUMAN	25	1	0	1	25	1	0	52.6	3.8	0	40.732	365	365	0	8.6082				2038	0	0	0	---	sp|P30447|1A23_HUMAN HLA class I histocompatibility antigen, A-23 alpha chain OS=Homo sapiens OX=9606 GN=HLA-A PE=1 SV=1	---	0	1	---	---	---	---	---	.	11.5473	13.2373	15.2943	12.1191	13.9348	11.9207	12.1173	12.5157	12.0658	12.2873	2.51241	-0.66277
sp|P54753|EPHB3_HUMAN	sp|P54753|EPHB3_HUMAN	sp|P54753|EPHB3_HUMAN	__Other	sp|P54753|EPHB3_HUMAN	5	1	1	1	5	1	1	6.9	1.9	1.9	110.33	998	998	0.0074358	1.1842				2649	0	0	0	EPHB3_HUMAN P54753	sp|P54753|EPHB3_HUMAN Ephrin type-B receptor 3 OS=Homo sapiens OX=9606 GN=EPHB3 PE=1 SV=2	2049	1	0	EPHB3	EK2 ETK2 HEK2 TYRO6	protein-coding	3q27.1	EPH receptor B3 ||| Ephrin type-B receptor 3	.		8.98891	9.07094	10.1692	7.22086	9.98004	8.69369	10.0866		7.22605	0.149885	1.24817
sp|Q00973|B4GN1_HUMAN	sp|Q00973|B4GN1_HUMAN	sp|Q00973|B4GN1_HUMAN	__Other	sp|Q00973|B4GN1_HUMAN	4	4	4	1	4	4	4	11.3	11.3	11.3	58.882	533	533	0	8.8182				3051	0	0	0	B4GN1_HUMAN Q00973	sp|Q00973|B4GN1_HUMAN Beta-1,4 N-acetylgalactosaminyltransferase 1 OS=Homo sapiens OX=9606 GN=B4GALNT1 PE=1 SV=2	2583	1	0	B4GALNT1	GALGT GALNACT GalNAc-T SPG26	protein-coding	12q13.3	beta-1,4-N-acetyl-galactosaminyltransferase 1 ||| Beta-1,4 N-acetylgalactosaminyltransferase 1	.	12.9629	13.7516	12.7628	12.2701	15.6601	13.0493	14.2849	11.881	13.3434	12.9476	-0.512071	-1.00483
sp|P09486|SPRC_HUMAN	sp|P09486|SPRC_HUMAN	sp|P09486|SPRC_HUMAN	__Other	sp|P09486|SPRC_HUMAN	10	10	10	1	10	10	10	51.2	51.2	51.2	34.632	303	303	0	126.4				1471	0	0	0	SPRC_HUMAN P09486	sp|P09486|SPRC_HUMAN SPARC OS=Homo sapiens OX=9606 GN=SPARC PE=1 SV=1	6678	1	0	SPARC	BM-40 OI17 ON ONT	protein-coding	5q33.1	secreted protein acidic and cysteine rich ||| SPARC	.		15.299	16.9559	14.2961	14.6338	13.5379	13.601	14.6261	14.4356	16.1948	2.17072	-0.489009
sp|P06702|S10A9_HUMAN	sp|P06702|S10A9_HUMAN	sp|P06702|S10A9_HUMAN	__Other	sp|P06702|S10A9_HUMAN	6	6	6	1	6	6	6	74.6	74.6	74.6	13.242	114	114	0	35.911				1377	0	0	0	S10A9_HUMAN P06702	sp|P06702|S10A9_HUMAN Protein S100-A9 OS=Homo sapiens OX=9606 GN=S100A9 PE=1 SV=1	6280	1	0	S100A9	60B8AG CAGB CFAG CGLB L1AG LIAG MAC387 MIF MRP14 NIF P14	protein-coding	1q21.3	S100 calcium binding protein A9 ||| Protein S100-A9	.	14.5967	15.1789	14.1309	14.8614	13.7296	17.2869	13.8853	13.8219	13.8519	14.0895	-0.326248	0.40421
sp|P98088|MUC5A_HUMAN	sp|P98088|MUC5A_HUMAN	sp|P98088|MUC5A_HUMAN	__Other	sp|P98088|MUC5A_HUMAN	16	16	16	1	16	16	16	7.3	7.3	7.3	585.56	5654	5654	0	114.85				3017	0	0	0	MUC5A_HUMAN P98088	sp|P98088|MUC5A_HUMAN Mucin-5AC OS=Homo sapiens OX=9606 GN=MUC5AC PE=1 SV=4	4586	1	0	MUC5AC	MUC5 TBM leB mucin	protein-coding	11p15.5	mucin 5AC, oligomeric mucus/gel-forming ||| Mucin-5AC	.	16.8185	15.8201	14.7355	17.2466	14.7007	17.3559	14.4219	14.7608	15.3425	14.7113	-0.67385	1.83718
sp|P07196|NFL_HUMAN	sp|P07196|NFL_HUMAN	sp|P07196|NFL_HUMAN	__Other	sp|P07196|NFL_HUMAN	6	3	3	1	6	3	3	9.4	6.1	6.1	61.516	543	543	0	5.8925				1393	0	0	0	NFL_HUMAN P07196	sp|P07196|NFL_HUMAN Neurofilament light polypeptide OS=Homo sapiens OX=9606 GN=NEFL PE=1 SV=3	4747	1	0	NEFL	CMT1F CMT2E CMTDIG NF-L NF68 NFL PPP1R110	protein-coding	8p21.2	neurofilament light ||| Neurofilament light polypeptide	.	11.4553	12.0324	10.8415	10.9479	12.2844	11.3156	13.7535	10.1726	10.4104	12.2239	-0.652254	-0.545812
sp|P29034|S10A2_HUMAN	sp|P29034|S10A2_HUMAN	sp|P29034|S10A2_HUMAN	__Other	sp|P29034|S10A2_HUMAN	3	3	3	1	3	3	3	27.6	27.6	27.6	11.117	98	98	0	9.8532				1990	0	0	0	S10A2_HUMAN P29034	sp|P29034|S10A2_HUMAN Protein S100-A2 OS=Homo sapiens OX=9606 GN=S100A2 PE=1 SV=3	6273	1	0	S100A2	CAN19 S100L	protein-coding	1q21.3	S100 calcium binding protein A2 ||| Protein S100-A2	.	13.2133	15.589	17.0206	13.9677	14.8941	14.9333	13.6386	16.1693	14.4352	16.1897	1.86455	-1.18837
sp|P19013|K2C4_HUMAN;CON__P19013	sp|P19013|K2C4_HUMAN;CON__P19013	sp|P19013|K2C4_HUMAN;CON__P19013	__Other	sp|P19013|K2C4_HUMAN;CON__P19013	21;21	17;17	12;12	2	21	17	12	40.4	35	27.3	57.285	534	534;594	0	67.459			+	36	2	0	0	K2C4_HUMAN P19013	sp|P19013|K2C4_HUMAN Keratin, type II cytoskeletal 4 OS=Homo sapiens OX=9606 GN=KRT4 PE=1 SV=4;	3851	1	0	KRT4	CK-4 CK4 CYK4 K4 WSN1	protein-coding	12q13.13	keratin 4 ||| Keratin, type II cytoskeletal 4	.	16.9245	16.4626	15.3337	16.7743	15.2892	18.388	15.1006	17.0798	15.4553	15.3198	-0.758908	0.681678
sp|Q71U36|TBA1A_HUMAN	sp|Q71U36|TBA1A_HUMAN	sp|Q71U36|TBA1A_HUMAN	__Other	sp|Q71U36|TBA1A_HUMAN	29	1	0	1	29	1	0	66.3	3.1	0	50.135	451	451	0	8.9549				4615	0	0	0	TBA1A_HUMAN Q71U36	sp|Q71U36|TBA1A_HUMAN Tubulin alpha-1A chain OS=Homo sapiens OX=9606 GN=TUBA1A PE=1 SV=1	7846	1	0	TUBA1A	B-ALPHA-1 LIS3 TUBA3	protein-coding	12q13.12	tubulin alpha 1a ||| Tubulin alpha-1A chain	.		10.4686	11.9214	9.41781	8.74854	8.30768	10.46	9.10887	9.13388	10.5863	2.21081	-0.292749
sp|P05120|PAI2_HUMAN	sp|P05120|PAI2_HUMAN	sp|P05120|PAI2_HUMAN	__Other	sp|P05120|PAI2_HUMAN	23	23	23	1	23	23	23	67.5	67.5	67.5	46.596	415	415	0	294.88				1345	0	0	0	PAI2_HUMAN P05120	sp|P05120|PAI2_HUMAN Plasminogen activator inhibitor 2 OS=Homo sapiens OX=9606 GN=SERPINB2 PE=1 SV=2	5055	1	0	SERPINB2	HsT1201 PAI PAI-2 PAI2 PLANH2	protein-coding	18q21.33-q22.1	serpin family B member 2 ||| Plasminogen activator inhibitor 2	.	17.2695	18.1337	20.4169	16.8687	17.2798	16.6987	17.2917	17.6258	17.3786	17.049	2.84073	-0.707422
sp|P19320|VCAM1_HUMAN	sp|P19320|VCAM1_HUMAN	sp|P19320|VCAM1_HUMAN	__Other	sp|P19320|VCAM1_HUMAN	20	20	20	1	20	20	20	33.7	33.7	33.7	81.275	739	739	0	97.525				1775	0	0	0	VCAM1_HUMAN P19320	sp|P19320|VCAM1_HUMAN Vascular cell adhesion protein 1 OS=Homo sapiens OX=9606 GN=VCAM1 PE=1 SV=1	7412	1	0	VCAM1	CD106 INCAM-100	protein-coding	1p21.2	vascular cell adhesion molecule 1 ||| Vascular cell adhesion protein 1	.	12.8293	16.1887	15.0705	14.8397	14.8078	14.7106	14.746	14.7797	14.985	18.181	-0.194564	-0.425302
sp|Q8TF76|HASP_HUMAN	sp|Q8TF76|HASP_HUMAN	sp|Q8TF76|HASP_HUMAN	__Other	sp|Q8TF76|HASP_HUMAN	3	3	3	1	3	3	3	7.5	7.5	7.5	88.494	798	798	0	8.5619				5538	0	0	0	HASP_HUMAN Q8TF76	sp|Q8TF76|HASP_HUMAN Serine/threonine-protein kinase haspin OS=Homo sapiens OX=9606 GN=HASPIN PE=1 SV=3	83903	1	0	HASPIN	GSG2	protein-coding	17p13.2	histone H3 associated protein kinase ||| Serine/threonine-protein kinase haspin	.	13.6297	13.1453	14.3996	13.5371	11.2899	12.1989	11.9201	14.3235	11.8631	12.4751	1.64864	0.786215
sp|P30461|1B13_HUMAN;sp|P30481|1B44_HUMAN	sp|P30481|1B44_HUMAN;sp|P30461|1B13_HUMAN	sp|P30461|1B13_HUMAN;sp|P30481|1B44_HUMAN	__Other	sp|P30461|1B13_HUMAN;sp|P30481|1B44_HUMAN	18;13	5;2	1;0	2	18	5	1	53.9	25.1	9.4	40.481	362	362;362	0	45.555				2041	0	0	0	---	sp|P30481|1B44_HUMAN HLA class I histocompatibility antigen, B-44 alpha chain OS=Homo sapiens OX=9606 GN=HLA-B PE=1 SV=1;sp|P30461|1B13_HUMAN HLA class I histocompatibility antigen, B-13 alpha chain OS=Homo sapiens OX=9606 GN=HLA-B PE=1 SV=1	---	0	1	---	---	---	---	---	.	13.1101	14.5374	16.3604	13.2343	13.4984	13.6321	15.6766	13.6685	13.2793	14.135	2.17481	-0.951238
sp|Q9BXN6|SPNXD_HUMAN;sp|Q9NS26|SPNXA_HUMAN;sp|Q9NY87|SPNXC_HUMAN	sp|Q9NY87|SPNXC_HUMAN;sp|Q9BXN6|SPNXD_HUMAN;sp|Q9NS26|SPNXA_HUMAN	sp|Q9BXN6|SPNXD_HUMAN;sp|Q9NS26|SPNXA_HUMAN;sp|Q9NY87|SPNXC_HUMAN	__Other	sp|Q9BXN6|SPNXD_HUMAN;sp|Q9NS26|SPNXA_HUMAN;sp|Q9NY87|SPNXC_HUMAN	3;3;2	2;2;1	2;2;1	3	3	2	2	32	20.6	20.6	10.982	97	97;97;97	0	3.2097				6750	0	0	0	SPNXA_HUMAN Q9NS26 SPNXC_HUMAN Q9NY87 SPNXD_HUMAN Q9BXN6	sp|Q9NY87|SPNXC_HUMAN Sperm protein associated with the nucleus on the X chromosome C OS=Homo sapiens OX=9606 GN=SPANXC PE=1 SV=2;sp|Q9BXN6|SPNXD_HUMAN Sperm protein associated with the nucleus on the X chromosome D OS=Homo sapiens OX=9606 GN=SPANXD PE=1 S	30014 728712 64663 64648	4	2	SPANXA1 SPANXA2 SPANXC SPANXD	CT11.1 CT11.3 NAP-X SPAN-X SPAN-Xa SPAN-Xb SPANX SPANX-A SPANX-C SPANXA SPANXC CTp11 SPANX-E SPANXE CT11.4 SPANX-D dJ171K16.1	protein-coding	Xq27.2	sperm protein associated with the nucleus, X-linked, family member A1 ||| SPANX family member A2 ||| Sperm protein associated with the nucleus on the X chromosome A ||| SPANX family member C ||| sperm protein associated with the nucleus, X-linked, family member A1 ||| SPANX family member D ||| Sperm protein associated with the nucleus on the X chromosome C ||| SPANX family member D ||| Sperm prot…	.	12.6785	12.3526	12.0031	11.8323	13.4829	11.3491	11.1238	14.3814	11.7041	11.1834	-0.129396	-0.300242
sp|Q96AK3|ABC3D_HUMAN	sp|Q96AK3|ABC3D_HUMAN	sp|Q96AK3|ABC3D_HUMAN	__Other	sp|Q96AK3|ABC3D_HUMAN	3	1	0	1	3	1	0	9.3	3.4	0	46.598	386	386	0.00038187	2.6996				5881	0	0	0	ABC3D_HUMAN Q96AK3	sp|Q96AK3|ABC3D_HUMAN DNA dC->dU-editing enzyme APOBEC-3D OS=Homo sapiens OX=9606 GN=APOBEC3D PE=1 SV=1	140564	1	0	APOBEC3D	A3D APOBEC3DE APOBEC3E ARP6	protein-coding	22q13.1	apolipoprotein B mRNA editing enzyme catalytic subunit 3D ||| DNA dC->dU-editing enzyme APOBEC-3D	.		8.78901	5.89635	8.76083	9.14865		7.34957		5.9517	7.68083	-1.56831	1.29618
sp|P51810|GP143_HUMAN	sp|P51810|GP143_HUMAN	sp|P51810|GP143_HUMAN	__Other	sp|P51810|GP143_HUMAN	6	6	6	1	6	6	6	17.3	17.3	17.3	43.878	404	404	0	14.651				2545	0	0	0	GP143_HUMAN P51810	sp|P51810|GP143_HUMAN G-protein coupled receptor 143 OS=Homo sapiens OX=9606 GN=GPR143 PE=1 SV=2	4935	1	0	GPR143	NYS6 OA1	protein-coding	Xp22.2	G-protein-coupled receptor 143 ||| G-protein coupled receptor 143	.	12.4849	13.3714	12.8266	12.2892	15.4506	12.1607	12.2823	11.9375	11.9867	12.0422	0.204595	-0.332725
sp|Q10589|BST2_HUMAN	sp|Q10589|BST2_HUMAN	sp|Q10589|BST2_HUMAN	__Other	sp|Q10589|BST2_HUMAN	2	2	2	1	2	2	2	10	10	10	19.769	180	180	0	3.5025				3242	0	0	0	BST2_HUMAN Q10589	sp|Q10589|BST2_HUMAN Bone marrow stromal antigen 2 OS=Homo sapiens OX=9606 GN=BST2 PE=1 SV=1	684	1	0	BST2	CD317 TETHERIN	protein-coding	19p13.11	bone marrow stromal cell antigen 2 ||| Bone marrow stromal antigen 2	.	15.3687	13.8328	12.6476	15.6759	12.7533	13.4502	12.9403	15.1028	12.8105	12.9352	-0.891837	2.1364
sp|Q8NFX7|STXB6_HUMAN	sp|Q8NFX7|STXB6_HUMAN	sp|Q8NFX7|STXB6_HUMAN	__Other	sp|Q8NFX7|STXB6_HUMAN	4	4	4	1	4	4	4	19	19	19	23.554	210	210	0	7.8474				5377	0	0	0	STXB6_HUMAN Q8NFX7	sp|Q8NFX7|STXB6_HUMAN Syntaxin-binding protein 6 OS=Homo sapiens OX=9606 GN=STXBP6 PE=1 SV=2	29091	1	0	STXBP6	HSPC156 amisyn	protein-coding	14q12	syntaxin binding protein 6 ||| Syntaxin-binding protein 6	.	13.2037	13.7879	15.9203	12.5923	12.7913	12.8775	14.1161	13.6516	12.4896	12.6031	2.54009	-0.787937
sp|Q9NVC3|S38A7_HUMAN	sp|Q9NVC3|S38A7_HUMAN	sp|Q9NVC3|S38A7_HUMAN	__Other	sp|Q9NVC3|S38A7_HUMAN	1	1	1	1	1	1	1	2.6	2.6	2.6	49.965	462	462	0	3.718				7507	0	0	0	S38A7_HUMAN Q9NVC3	sp|Q9NVC3|S38A7_HUMAN Putative sodium-coupled neutral amino acid transporter 7 OS=Homo sapiens OX=9606 GN=SLC38A7 PE=1 SV=1	55238	1	0	SLC38A7	SNAT7	protein-coding	16q21	solute carrier family 38 member 7 ||| Putative sodium-coupled neutral amino acid transporter 7	.		11.5147	11.3957	9.27855	11.9634	11.8315	9.4467	11.5103	12.2647	12.0171	0.182165	-1.93494
sp|O43759|SNG1_HUMAN	sp|O43759|SNG1_HUMAN	sp|O43759|SNG1_HUMAN	__Other	sp|O43759|SNG1_HUMAN	1	1	1	1	1	1	1	5.2	5.2	5.2	25.455	233	233	0	4.4213				674	0	0	0	SNG1_HUMAN O43759	sp|O43759|SNG1_HUMAN Synaptogyrin-1 OS=Homo sapiens OX=9606 GN=SYNGR1 PE=1 SV=2	9145	1	0	SYNGR1	---	protein-coding	22q13.1	synaptogyrin 1 ||| Synaptogyrin-1	.		10.7189	9.77239	9.8723	12.767	9.26199	10.5644	9.11484	9.71323	10.774	-0.457625	-0.357714
sp|Q02318|CP27A_HUMAN	sp|Q02318|CP27A_HUMAN	sp|Q02318|CP27A_HUMAN	__Other	sp|Q02318|CP27A_HUMAN	1	1	1	1	1	1	1	2.3	2.3	2.3	60.234	531	531	0	3.9385				3091	0	0	0	CP27A_HUMAN Q02318	sp|Q02318|CP27A_HUMAN Sterol 26-hydroxylase, mitochondrial OS=Homo sapiens OX=9606 GN=CYP27A1 PE=1 SV=1	1593	1	0	CYP27A1	CP27 CTX CYP27	protein-coding	2q35	cytochrome P450 family 27 subfamily A member 1 ||| Sterol 26-hydroxylase, mitochondrial	.		11.0527	11.6816	9.98087	11.9561	9.70983	9.65014	9.70146	9.93443	12.4154	1.05289	-0.647862
sp|Q969Z3|MARC2_HUMAN	sp|Q969Z3|MARC2_HUMAN	sp|Q969Z3|MARC2_HUMAN	__Other	sp|Q969Z3|MARC2_HUMAN	5	4	4	1	5	4	4	15.5	11	11	38.023	335	335	0	4.6872				5856	0	0	0	MARC2_HUMAN Q969Z3	sp|Q969Z3|MARC2_HUMAN Mitochondrial amidoxime reducing component 2 OS=Homo sapiens OX=9606 GN=MARC2 PE=1 SV=1	54996	1	0	MTARC2	MARC2 MOSC2	protein-coding	1q41	mitochondrial amidoxime reducing component 2	.	14.1133	14.033	14.6044	14.3012	14.7781	15.1789	12.3843	12.9391	12.0643	14.1229	0.80776	0.504516
sp|A6NKQ9|CGB1_HUMAN;sp|P0DN86|CGB3_HUMAN;sp|P0DN87|CGB7_HUMAN;sp|Q6NT52|CGB2_HUMAN	sp|P0DN86|CGB3_HUMAN;sp|A6NKQ9|CGB1_HUMAN;sp|Q6NT52|CGB2_HUMAN;sp|P0DN87|CGB7_HUMAN	sp|A6NKQ9|CGB1_HUMAN;sp|P0DN86|CGB3_HUMAN;sp|P0DN87|CGB7_HUMAN;sp|Q6NT52|CGB2_HUMAN	__Other	sp|A6NKQ9|CGB1_HUMAN;sp|P0DN86|CGB3_HUMAN;sp|P0DN87|CGB7_HUMAN;sp|Q6NT52|CGB2_HUMAN	2;2;1;1	2;2;1;1	2;2;1;1	4	2	2	2	16.4	16.4	16.4	17.739	165	165;187;163;165	0.00038221	2.7263				246	0	0	0	CGB1_HUMAN A6NKQ9 CGB2_HUMAN Q6NT52 CGB3_HUMAN P0DN86 CGB7_HUMAN P0DN87	sp|P0DN86|CGB3_HUMAN Choriogonadotropin subunit beta 3 OS=Homo sapiens OX=9606 GN=CGB3 PE=1 SV=1;sp|A6NKQ9|CGB1_HUMAN Choriogonadotropin subunit beta variant 1 OS=Homo sapiens OX=9606 GN=CGB1 PE=2 SV=3;sp|Q6NT52|CGB2_HUMAN Choriogonadotropin subunit beta v	114335 114336 1082 93659 94027 94115	6	2	CGB1 CGB2 CGB3 CGB5 CGB7 CGB8	CGB CGB5 CGB7 CGB8 hCGB HCG CG-beta-a CGB6	protein-coding	19q13.33	chorionic gonadotropin subunit beta 1 ||| Choriogonadotropin subunit beta variant 1 ||| chorionic gonadotropin subunit beta 2 ||| Choriogonadotropin subunit beta variant 2 ||| chorionic gonadotropin subunit beta 3 ||| chorionic gonadotropin subunit beta 5 ||| chorionic gonadotropin subunit beta 7 ||| chorionic gonadotropin subunit beta 8 ||| Choriogonadotropin subunit beta 3 ||| chorionic gonadot…	.	13.3847	12.8331	12.8361	14.4073	12.2807	11.539	11.5564	14.1125	12.6503	11.3128	0.249202	1.82047
sp|Q86T26|TM11B_HUMAN;sp|Q9Y5Y6|ST14_HUMAN	sp|Q9Y5Y6|ST14_HUMAN;sp|Q86T26|TM11B_HUMAN	sp|Q86T26|TM11B_HUMAN;sp|Q9Y5Y6|ST14_HUMAN	__Other	sp|Q9Y5Y6|ST14_HUMAN	19;1	19;1	19;1	2	19	19	19	32	32	32	94.769	855	855;416	0	96.748				8487	0	0	0	ST14_HUMAN Q9Y5Y6 TM11B_HUMAN Q86T26	sp|Q9Y5Y6|ST14_HUMAN Suppressor of tumorigenicity 14 protein OS=Homo sapiens OX=9606 GN=ST14 PE=1 SV=2	6768 132724	2	5	ST14 TMPRSS11B	ARCI11 HAI MT-SP1 MTSP1 PRSS14 SNC19 TADG15 TMPRSS14	protein-coding	11q24.3!4q13.2	suppression of tumorigenicity 14 ||| Suppressor of tumorigenicity 14 protein ||| transmembrane serine protease 11B ||| Transmembrane protease serine 11B	.	17.3394	16.5523	15.4896	17.5942	15.4424	17.843	15.4549	17.514	15.5577	15.1115	-0.761279	1.34328
sp|Q92563|TICN2_HUMAN	sp|Q92563|TICN2_HUMAN	sp|Q92563|TICN2_HUMAN	__Other	sp|Q92563|TICN2_HUMAN	4	4	4	1	4	4	4	14.2	14.2	14.2	46.779	424	424	0	20.374				5692	0	0	0	TICN2_HUMAN Q92563	sp|Q92563|TICN2_HUMAN Testican-2 OS=Homo sapiens OX=9606 GN=SPOCK2 PE=1 SV=1	9806	1	0	SPOCK2	testican-2	protein-coding	10q22.1	SPARC (osteonectin), cwcv and kazal like domains proteoglycan 2 ||| Testican-2	.	12.2244	13.8009	12.9719	12.9097	13.0299	13.2544	15.9663	12.4206	12.45	12.4517	-0.209936	-0.272119
sp|O14684|PTGES_HUMAN	sp|O14684|PTGES_HUMAN	sp|O14684|PTGES_HUMAN	__Other	sp|O14684|PTGES_HUMAN	4	4	4	1	4	4	4	18.4	18.4	18.4	17.102	152	152	0	9.8119				412	0	0	0	PTGES_HUMAN O14684	sp|O14684|PTGES_HUMAN Prostaglandin E synthase OS=Homo sapiens OX=9606 GN=PTGES PE=1 SV=2	9536	1	0	PTGES	MGST-IV MGST1-L1 MGST1L1 MPGES PGES PIG12 PP102 PP1294 TP53I12 mPGES-1	protein-coding	9q34.11	prostaglandin E synthase	.	15.2804	15.3125	13.8413	14.4299	14.5209	16.9878	14.5786	14.8146	16.4076	13.7654	-1.07698	-0.488348
sp|P16144|ITB4_HUMAN	sp|P16144|ITB4_HUMAN	sp|P16144|ITB4_HUMAN	__Other	sp|P16144|ITB4_HUMAN	66	66	66	1	66	66	66	45.1	45.1	45.1	202.16	1822	1822	0	323.31				1689	0	0	0	ITB4_HUMAN P16144	sp|P16144|ITB4_HUMAN Integrin beta-4 OS=Homo sapiens OX=9606 GN=ITGB4 PE=1 SV=5	3691	1	0	ITGB4	CD104 GP150	protein-coding	17q25.1	integrin subunit beta 4 ||| Integrin beta-4	.	19.7638	19.2025	19.5218	20.1638	18.4822	18.3718	17.6276	20.7807	18.0235	17.83	0.671605	1.31368
sp|Q9H8M9|EVA1A_HUMAN	sp|Q9H8M9|EVA1A_HUMAN	sp|Q9H8M9|EVA1A_HUMAN	__Other	sp|Q9H8M9|EVA1A_HUMAN	1	1	1	1	1	1	1	7.2	7.2	7.2	17.469	152	152	0	2.9921				7148	0	0	0	EVA1A_HUMAN Q9H8M9	sp|Q9H8M9|EVA1A_HUMAN Protein eva-1 homolog A OS=Homo sapiens OX=9606 GN=EVA1A PE=1 SV=1	84141	1	0	EVA1A	FAM176A TMEM166	protein-coding	2p12	eva-1 homolog A, regulator of programmed cell death ||| Protein eva-1 homolog A	.	13.3227	13.2608	13.8322	13.9209	11.7375	11.8067	11.3146	13.8655	11.858	13.7076	1.07679	1.16555
sp|P04233|HG2A_HUMAN	sp|P04233|HG2A_HUMAN	sp|P04233|HG2A_HUMAN	__Other	sp|P04233|HG2A_HUMAN	6	6	6	1	6	6	6	19.9	19.9	19.9	33.515	296	296	0	82.609				1316	0	0	0	HG2A_HUMAN P04233	sp|P04233|HG2A_HUMAN HLA class II histocompatibility antigen gamma chain OS=Homo sapiens OX=9606 GN=CD74 PE=1 SV=3	972	1	0	CD74	DHLAG HLADG II Ia-GAMMA p33	protein-coding	5q33.1	CD74 molecule ||| HLA class II histocompatibility antigen gamma chain	.	16.0105	15.0566	15.6826	16.8055	14.1463	13.6388	13.6207	13.8938	15.5566	14.4187	0.962228	2.08509
sp|Q6ISB3|GRHL2_HUMAN;sp|Q9NZI5|GRHL1_HUMAN	sp|Q6ISB3|GRHL2_HUMAN;sp|Q9NZI5|GRHL1_HUMAN	sp|Q6ISB3|GRHL2_HUMAN;sp|Q9NZI5|GRHL1_HUMAN	__Other	sp|Q6ISB3|GRHL2_HUMAN	17;1	17;1	17;1	2	17	17	17	38.9	38.9	38.9	71.104	625	625;618	0	69.661				4359	0	0	0	GRHL1_HUMAN Q9NZI5 GRHL2_HUMAN Q6ISB3	sp|Q6ISB3|GRHL2_HUMAN Grainyhead-like protein 2 homolog OS=Homo sapiens OX=9606 GN=GRHL2 PE=1 SV=1	29841 79977	2	5	GRHL1 GRHL2	LBP32 MGR NH32 TFCP2L2 BOM DFNA28 ECTDS PPCD4 TFCP2L3	protein-coding	2p25.1!8q22.3	grainyhead like transcription factor 1 ||| Grainyhead-like protein 1 homolog ||| grainyhead like transcription factor 2 ||| Grainyhead-like protein 2 homolog	.	16.6619	16.1998	14.9833	16.9497	14.8089	17.4183	14.8202	17.1768	15.1487	15.0384	-0.809727	1.15666
sp|Q8IV36|HID1_HUMAN	sp|Q8IV36|HID1_HUMAN	sp|Q8IV36|HID1_HUMAN	__Other	sp|Q8IV36|HID1_HUMAN	1	1	1	1	1	1	1	1.3	1.3	1.3	88.743	788	788	0.0024768	1.9587				4930	0	0	0	HID1_HUMAN Q8IV36	sp|Q8IV36|HID1_HUMAN Protein HID1 OS=Homo sapiens OX=9606 GN=HID1 PE=1 SV=1	283987	1	0	HID1	17orf28 C17orf28 DMC1 HID-1	protein-coding	17q25.1	HID1 domain containing ||| Protein HID1	.	12.3399	11.9136	10.5428	12.7118	11.0776	13.722	11.0877	11.7418	10.541	10.6062	-0.961031	1.2079
sp|P08729|K2C7_HUMAN;CON__Q3KNV1	sp|P08729|K2C7_HUMAN;CON__Q3KNV1	sp|P08729|K2C7_HUMAN;CON__Q3KNV1	__Other	sp|P08729|K2C7_HUMAN;CON__Q3KNV1	53;53	46;46	5;5	2	53	46	5	74	66.3	8.1	51.385	469	469;469	0	323.31			+	59	2	0	0	Q3KNV1 K2C7_HUMAN P08729	sp|P08729|K2C7_HUMAN Keratin, type II cytoskeletal 7 OS=Homo sapiens OX=9606 GN=KRT7 PE=1 SV=5;	3855	1	0	KRT7	CK7 K2C7 K7 SCL	protein-coding	12q13.13	keratin 7 ||| keratin 7 ||| Keratin, type II cytoskeletal 7	.	21.028	20.8179	22.1087	21.2769	20.3263	21.0628	18.5408	21.6105	19.7694	19.9106	1.53292	0.701161
sp|Q9UN81|LORF1_HUMAN	sp|Q9UN81|LORF1_HUMAN	sp|Q9UN81|LORF1_HUMAN	__Other	sp|Q9UN81|LORF1_HUMAN	17	17	17	1	17	17	17	45.3	45.3	45.3	40.055	338	338	0	41.649				8128	0	0	0	LORF1_HUMAN Q9UN81	sp|Q9UN81|LORF1_HUMAN LINE-1 retrotransposable element ORF1 protein OS=Homo sapiens OX=9606 GN=L1RE1 PE=1 SV=1	---	1	0	L1RE1	---	---	---	LINE-1 retrotransposable element ORF1 protein	.	16.9448	17.2459	16.063	16.349	17.4395	17.1613	16.1301	19.2849	16.4653	15.6207	-0.751255	-0.465199
sp|O95171|SCEL_HUMAN	sp|O95171|SCEL_HUMAN	sp|O95171|SCEL_HUMAN	__Other	sp|O95171|SCEL_HUMAN	24	24	24	1	24	24	24	34.2	34.2	34.2	77.551	688	688	0	51.425				1091	0	0	0	SCEL_HUMAN O95171	sp|O95171|SCEL_HUMAN Sciellin OS=Homo sapiens OX=9606 GN=SCEL PE=1 SV=2	8796	1	0	SCEL	---	protein-coding	13q22.3	sciellin	.	17.6851	17.1429	15.9934	17.9987	15.9046	18.4863	15.9394	18.1435	16.1277	15.9931	-0.829926	1.17538
sp|Q687X5|STEA4_HUMAN	sp|Q687X5|STEA4_HUMAN	sp|Q687X5|STEA4_HUMAN	__Other	sp|Q687X5|STEA4_HUMAN	9	9	9	1	9	9	9	29.4	29.4	29.4	51.981	459	459	0	102.01				4289	0	0	0	STEA4_HUMAN Q687X5	sp|Q687X5|STEA4_HUMAN Metalloreductase STEAP4 OS=Homo sapiens OX=9606 GN=STEAP4 PE=1 SV=1	79689	1	0	STEAP4	STAMP2 SchLAH TIARP TNFAIP9	protein-coding	7q21.12	STEAP4 metalloreductase ||| Metalloreductase STEAP4	.	15.9168	15.4587	14.3483	15.0041	14.3769	17.6893	14.4683	14.4929	14.3297	14.3283	-0.531452	0.124389
sp|P21589|5NTD_HUMAN	sp|P21589|5NTD_HUMAN	sp|P21589|5NTD_HUMAN	__Other	sp|P21589|5NTD_HUMAN	24	24	24	1	24	24	24	59.1	59.1	59.1	63.367	574	574	0	323.31				1831	0	0	0	5NTD_HUMAN P21589	sp|P21589|5NTD_HUMAN 5-nucleotidase OS=Homo sapiens OX=9606 GN=NT5E PE=1 SV=1	4907	1	0	NT5E	CALJA CD73 E5NT NT NT5 NTE eN eNT	protein-coding	6q14.3	5'-nucleotidase ecto ||| 5'-nucleotidase	.	19.0874	18.388	18.9691	19.5361	17.3079	17.0646	16.8542	19.731	17.6382	17.4462	0.900724	1.4677
sp|Q16719|KYNU_HUMAN	sp|Q16719|KYNU_HUMAN	sp|Q16719|KYNU_HUMAN	__Other	sp|Q16719|KYNU_HUMAN	21	21	21	1	21	21	21	50.5	50.5	50.5	52.351	465	465	0	168.7				3873	0	0	0	KYNU_HUMAN Q16719	sp|Q16719|KYNU_HUMAN Kynureninase OS=Homo sapiens OX=9606 GN=KYNU PE=1 SV=1	8942	1	0	KYNU	KYNUU VCRL2	protein-coding	2q22.2	kynureninase	.	16.7835	17.3485	15.983	16.6141	16.8327	19.1605	15.8196	15.931	17.9832	17.0349	-0.936874	-0.305761
sp|P07197|NFM_HUMAN	sp|P07197|NFM_HUMAN	sp|P07197|NFM_HUMAN	__Other	sp|P07197|NFM_HUMAN	20	15	15	1	20	15	15	25.2	21.9	21.9	102.47	916	916	0	49.588				1394	0	0	0	NFM_HUMAN P07197	sp|P07197|NFM_HUMAN Neurofilament medium polypeptide OS=Homo sapiens OX=9606 GN=NEFM PE=1 SV=3	4741	1	0	NEFM	NEF3 NF-M NFM	protein-coding	8p21.2	neurofilament medium ||| Neurofilament medium polypeptide	.	15.4523	15.7883	15.4396	14.8547	18.0346	14.7493	14.6569	14.8647	14.4705	15.0855	0.170097	-0.414731
sp|Q9BPW9|DHRS9_HUMAN	sp|Q9BPW9|DHRS9_HUMAN	sp|Q9BPW9|DHRS9_HUMAN	__Other	sp|Q9BPW9|DHRS9_HUMAN	1	1	1	1	1	1	1	3.8	3.8	3.8	35.227	319	319	0.00087544	2.1866				6479	0	0	0	DHRS9_HUMAN Q9BPW9	sp|Q9BPW9|DHRS9_HUMAN Dehydrogenase/reductase SDR family member 9 OS=Homo sapiens OX=9606 GN=DHRS9 PE=1 SV=1	10170	1	0	DHRS9	3-alpha-HSD 3ALPHA-HSD RDH-E2 RDH-TBE RDH15 RDHL RDHTBE RETSDR8 SDR9C4	protein-coding	2q31.1	dehydrogenase/reductase 9 ||| Dehydrogenase/reductase SDR family member 9	.		9.3012	8.81478	8.31004	9.70471	11.2869	7.77211	8.6643	7.78477	9.10445	-0.115482	-0.620221
sp|Q8N257|H2B3B_HUMAN	sp|Q8N257|H2B3B_HUMAN	sp|Q8N257|H2B3B_HUMAN	__Other	sp|Q8N257|H2B3B_HUMAN	10	1	1	1	10	1	1	61.9	5.6	5.6	13.908	126	126	1	-2	+			5109	0	0	0	H2B3B_HUMAN Q8N257	sp|Q8N257|H2B3B_HUMAN Histone H2B type 3-B OS=Homo sapiens OX=9606 GN=HIST3H2BB PE=1 SV=3	128312	1	0	H2BU1	H2Bb HIST3H2BB	protein-coding	1q42.13	H2B.U histone 1 ||| Histone H2B type 3-B	.		12.2219	9.74479	11.9897	12.9253	12.6439	13.2752	12.0753	11.0893	12.6961	-2.31016	-0.0652641
sp|Q04828|AK1C1_HUMAN	sp|Q04828|AK1C1_HUMAN	sp|Q04828|AK1C1_HUMAN	__Other	sp|Q04828|AK1C1_HUMAN	20	20	4	1	20	20	4	70.6	70.6	12.1	36.788	323	323	0	200.94				3137	0	0	0	AK1C1_HUMAN Q04828	sp|Q04828|AK1C1_HUMAN Aldo-keto reductase family 1 member C1 OS=Homo sapiens OX=9606 GN=AKR1C1 PE=1 SV=1	1645	1	0	AKR1C1	2-ALPHA-HSD 20-ALPHA-HSD C9 DD1 DD1/DD2 DDH DDH1 H-37 HAKRC HBAB MBAB	protein-coding	10p15.1	aldo-keto reductase family 1 member C1	.	18.056	18.839	17.7053	18.2017	19.2857	20.7814	17.4167	17.5593	18.3793	17.62	-0.663357	-0.167002
sp|P10451|OSTP_HUMAN;CON__P31096	sp|P10451|OSTP_HUMAN;CON__P31096	sp|P10451|OSTP_HUMAN;CON__P31096	__Other	sp|P10451|OSTP_HUMAN	5;1	5;1	5;1	2	5	5	5	25.5	25.5	25.5	35.422	314	314;262	0	168.11				1527	2	0	0	OSTP_HUMAN P10451	sp|P10451|OSTP_HUMAN Osteopontin OS=Homo sapiens OX=9606 GN=SPP1 PE=1 SV=1	6696	1	0	SPP1	BNSP BSPI ETA-1 OPN	protein-coding	4q22.1	secreted phosphoprotein 1 ||| Osteopontin	.		13.4454	12.3612	12.6734	13.2633	15.5835	12.6113	12.5241	12.0569	12.1011	-0.535639	-0.22347
sp|O75155|CAND2_HUMAN	sp|O75155|CAND2_HUMAN	sp|O75155|CAND2_HUMAN	__Other	sp|O75155|CAND2_HUMAN	8	2	2	1	8	2	2	5.7	2.7	2.7	135.25	1236	1236	0.003672	1.651				839	0	0	0	CAND2_HUMAN O75155	sp|O75155|CAND2_HUMAN Cullin-associated NEDD8-dissociated protein 2 OS=Homo sapiens OX=9606 GN=CAND2 PE=1 SV=3	23066	1	0	CAND2	TIP120B Tp120b	protein-coding	3p25.2	cullin associated and neddylation dissociated 2 (putative) ||| Cullin-associated NEDD8-dissociated protein 2	.		9.4558			7.3013	10.1123	10.1313	7.19362	7.80672	8.38503	NA	NA
sp|Q8IVL0|NAV3_HUMAN	sp|Q8IVL0|NAV3_HUMAN	sp|Q8IVL0|NAV3_HUMAN	__Other	sp|Q8IVL0|NAV3_HUMAN	2	1	1	1	2	1	1	1	0.6	0.6	255.65	2385	2385	0.00050569	2.5147				4944	0	0	0	NAV3_HUMAN Q8IVL0	sp|Q8IVL0|NAV3_HUMAN Neuron navigator 3 OS=Homo sapiens OX=9606 GN=NAV3 PE=1 SV=3	89795	1	0	NAV3	POMFIL1 STEERIN3 unc53H3	protein-coding	12q21.2	neuron navigator 3	.		10.0867	10.9558	8.10867	10.1766	8.47159	8.82405	9.479	9.67443	11.3109	1.33069	-1.51645
sp|Q6DT37|MRCKG_HUMAN	sp|Q6DT37|MRCKG_HUMAN	sp|Q6DT37|MRCKG_HUMAN	__Other	sp|Q6DT37|MRCKG_HUMAN	4	1	1	1	4	1	1	2.1	0.6	0.6	172.46	1551	1551	0.00087533	2.1825				4327	0	0	0	MRCKG_HUMAN Q6DT37	sp|Q6DT37|MRCKG_HUMAN Serine/threonine-protein kinase MRCK gamma OS=Homo sapiens OX=9606 GN=CDC42BPG PE=1 SV=2	55561	1	0	CDC42BPG	DMPK2 HSMDPKIN KAPPA-200 MRCKG MRCKgamma	protein-coding	11q13.1	CDC42 binding protein kinase gamma ||| Serine/threonine-protein kinase MRCK gamma	.		10.8031	9.77943	11.4951	9.4663	11.9805	9.77406	12.2555	9.84502	9.85312	-0.776709	0.93899
sp|Q7Z7M9|GALT5_HUMAN	sp|Q7Z7M9|GALT5_HUMAN	sp|Q7Z7M9|GALT5_HUMAN	__Other	sp|Q7Z7M9|GALT5_HUMAN	6	6	6	1	6	6	6	8.4	8.4	8.4	106.26	940	940	0	31.037				4765	0	0	0	GALT5_HUMAN Q7Z7M9	sp|Q7Z7M9|GALT5_HUMAN Polypeptide N-acetylgalactosaminyltransferase 5 OS=Homo sapiens OX=9606 GN=GALNT5 PE=1 SV=1	11227	1	0	GALNT5	GALNAC-T5 GALNACT5	protein-coding	2q24.1	polypeptide N-acetylgalactosaminyltransferase 5	.	14.0087	13.7753	14.4468	14.7633	15.0844	12.6607	12.1357	13.3441	12.7122	12.5023	0.990581	1.30713
sp|Q12841|FSTL1_HUMAN	sp|Q12841|FSTL1_HUMAN	sp|Q12841|FSTL1_HUMAN	__Other	sp|Q12841|FSTL1_HUMAN	16	16	16	1	16	16	16	60.7	60.7	60.7	34.985	308	308	0	79.433				3265	0	0	0	FSTL1_HUMAN Q12841	sp|Q12841|FSTL1_HUMAN Follistatin-related protein 1 OS=Homo sapiens OX=9606 GN=FSTL1 PE=1 SV=1	11167	1	0	FSTL1	FRP FSL1 MIR198 OCC-1 OCC1 tsc36	protein-coding	3q13.33	follistatin like 1 ||| Follistatin-related protein 1	.	16.0619	16.8169	18.4495	16.8379	16.0019	15.2446	15.1229	15.6577	16.5804	17.4414	2.03248	0.420889
sp|P13612|ITA4_HUMAN	sp|P13612|ITA4_HUMAN	sp|P13612|ITA4_HUMAN	__Other	sp|P13612|ITA4_HUMAN	12	12	12	1	12	12	12	12.6	12.6	12.6	114.9	1032	1032	0	18.322				1606	0	0	0	ITA4_HUMAN P13612	sp|P13612|ITA4_HUMAN Integrin alpha-4 OS=Homo sapiens OX=9606 GN=ITGA4 PE=1 SV=3	3676	1	0	ITGA4	CD49D IA4	protein-coding	2q31.3	integrin subunit alpha 4 ||| Integrin alpha-4	.	15.0776	15.9142	15.5896	14.9248	18.0666	14.7303	14.6987	14.7589	14.8429	15.7289	0.171996	-0.492818
sp|Q9BW04|SARG_HUMAN	sp|Q9BW04|SARG_HUMAN	sp|Q9BW04|SARG_HUMAN	__Other	sp|Q9BW04|SARG_HUMAN	7	7	7	1	7	7	7	14.3	14.3	14.3	63.964	601	601	0	13.844				6698	0	0	0	SARG_HUMAN Q9BW04	sp|Q9BW04|SARG_HUMAN Specifically androgen-regulated gene protein OS=Homo sapiens OX=9606 GN=SARG PE=1 SV=2	79098	1	0	C1orf116	SARG	protein-coding	1q32.1	chromosome 1 open reading frame 116 ||| Specifically androgen-regulated gene protein	.	14.6367	14.1313	13.6153	15.0303	12.939	14.9199	12.4409	15.2922	13.1069	12.775	-0.149648	1.2654
sp|P26447|S10A4_HUMAN	sp|P26447|S10A4_HUMAN	sp|P26447|S10A4_HUMAN	__Other	sp|P26447|S10A4_HUMAN	5	5	5	1	5	5	5	36.6	36.6	36.6	11.728	101	101	0	13.795				1937	0	0	0	S10A4_HUMAN P26447	sp|P26447|S10A4_HUMAN Protein S100-A4 OS=Homo sapiens OX=9606 GN=S100A4 PE=1 SV=1	6275	1	0	S100A4	18A2 42A CAPL FSP1 MTS1 P9KA PEL98	protein-coding	1q21.3	S100 calcium binding protein A4 ||| Protein S100-A4	.	15.4668	15.8602	15.1102	14.6452	16.9662	15.3254	14.4987	17.4163	15.1945	14.346	-0.327625	-0.792582
sp|Q96T17|MA7D2_HUMAN	sp|Q96T17|MA7D2_HUMAN	sp|Q96T17|MA7D2_HUMAN	__Other	sp|Q96T17|MA7D2_HUMAN	1	1	1	1	1	1	1	2.2	2.2	2.2	81.964	732	732	0	2.9261				6367	0	0	0	MA7D2_HUMAN Q96T17	sp|Q96T17|MA7D2_HUMAN MAP7 domain-containing protein 2 OS=Homo sapiens OX=9606 GN=MAP7D2 PE=1 SV=2	256714	1	0	MAP7D2	---	protein-coding	Xp22.12	MAP7 domain containing 2 ||| MAP7 domain-containing protein 2	.		9.09003	7.93956	7.22034		6.82513	7.72619	10.5963	7.77391	7.73816	-0.034665	-0.75389
sp|Q6B0I6|KDM4D_HUMAN	sp|Q6B0I6|KDM4D_HUMAN	sp|Q6B0I6|KDM4D_HUMAN	__Other	sp|Q6B0I6|KDM4D_HUMAN	1	1	1	1	1	1	1	2.1	2.1	2.1	58.602	523	523	0.0083692	1.1194				4318	0	0	0	KDM4D_HUMAN Q6B0I6	sp|Q6B0I6|KDM4D_HUMAN Lysine-specific demethylase 4D OS=Homo sapiens OX=9606 GN=KDM4D PE=1 SV=3	55693	1	0	KDM4D	JMJD2D	protein-coding	11q21	lysine demethylase 4D ||| Lysine-specific demethylase 4D	.		9.66471	8.95399	6.89896	9.47077	8.97654	10.2987	10.713	9.06715	9.54105	-0.286025	-2.34105
sp|A8MUU1|FB5L3_HUMAN;sp|Q01469|FABP5_HUMAN	sp|Q01469|FABP5_HUMAN;sp|A8MUU1|FB5L3_HUMAN	sp|A8MUU1|FB5L3_HUMAN;sp|Q01469|FABP5_HUMAN	__Other	sp|Q01469|FABP5_HUMAN	15;2	15;2	15;2	2	15	15	15	70.4	70.4	70.4	15.164	135	135;101	0	265.84				3064	0	0	0	FABP5_HUMAN Q01469 FB5L3_HUMAN A8MUU1	sp|Q01469|FABP5_HUMAN Fatty acid-binding protein 5 OS=Homo sapiens OX=9606 GN=FABP5 PE=1 SV=3	2171 220832	2	5	FABP5 FABP5P3	E-FABP EFABP KFABP PA-FABP PAFABP FABP5L3	protein-coding|pseudo	8q21.13!7q36.1	fatty acid binding protein 5 ||| Fatty acid-binding protein 5 ||| fatty acid binding protein 5 pseudogene 3 ||| Putative fatty acid-binding protein 5-like protein 3	.	17.0684	18.1251	17.7693	16.1869	18.8485	16.3292	17.2981	18.4425	19.3973	17.9229	-0.00507513	-1.58741
sp|Q96D15|RCN3_HUMAN	sp|Q96D15|RCN3_HUMAN	sp|Q96D15|RCN3_HUMAN	__Other	sp|Q96D15|RCN3_HUMAN	12	12	12	1	12	12	12	48.8	48.8	48.8	37.493	328	328	0	158.03				5971	0	0	0	RCN3_HUMAN Q96D15	sp|Q96D15|RCN3_HUMAN Reticulocalbin-3 OS=Homo sapiens OX=9606 GN=RCN3 PE=1 SV=1	57333	1	0	RCN3	RLP49	protein-coding	19q13.33	reticulocalbin 3 ||| Reticulocalbin-3	.	14.4676	15.1327	14.1081	14.0574	15.7423	13.9906	13.6982	15.8233	16.7081	14.021	-0.660531	-0.711225
sp|O15247|CLIC2_HUMAN	sp|O15247|CLIC2_HUMAN	sp|O15247|CLIC2_HUMAN	__Other	sp|O15247|CLIC2_HUMAN	10	10	10	1	10	10	10	61.9	61.9	61.9	28.356	247	247	0	188.66				516	0	0	0	CLIC2_HUMAN O15247	sp|O15247|CLIC2_HUMAN Chloride intracellular channel protein 2 OS=Homo sapiens OX=9606 GN=CLIC2 PE=1 SV=3	1193	1	0	CLIC2	CLCNL2 CLIC2b MRXS32 XAP121	protein-coding	Xq28	chloride intracellular channel 2 ||| Chloride intracellular channel protein 2	.	17.1975	15.5457	14.9637	17.5379	14.0471	14.1499	14.4336	14.7482	14.3602	14.3324	0.142038	2.71628
sp|P12429|ANXA3_HUMAN	sp|P12429|ANXA3_HUMAN	sp|P12429|ANXA3_HUMAN	__Other	sp|P12429|ANXA3_HUMAN	22	22	22	1	22	22	22	66.6	66.6	66.6	36.375	323	323	0	117.34				1586	0	0	0	ANXA3_HUMAN P12429	sp|P12429|ANXA3_HUMAN Annexin A3 OS=Homo sapiens OX=9606 GN=ANXA3 PE=1 SV=3	306	1	0	ANXA3	ANX3	protein-coding	4q21.21	annexin A3	.	18.5722	18.3291	19.887	18.8124	16.8441	17.9645	16.5344	18.9646	17.5185	17.5902	1.87257	0.797906
sp|Q8N0W7|FMR1N_HUMAN	sp|Q8N0W7|FMR1N_HUMAN	sp|Q8N0W7|FMR1N_HUMAN	__Other	sp|Q8N0W7|FMR1N_HUMAN	3	3	3	1	3	3	3	16.5	16.5	16.5	29.24	255	255	0	18.241				5078	0	0	0	FMR1N_HUMAN Q8N0W7	sp|Q8N0W7|FMR1N_HUMAN Fragile X mental retardation 1 neighbor protein OS=Homo sapiens OX=9606 GN=FMR1NB PE=2 SV=1	158521	1	0	FMR1NB	CT37 NY-SAR-35 NYSAR35	protein-coding	Xq27.3-q28	FMR1 neighbor ||| Fragile X mental retardation 1 neighbor protein	.	15.2177	14.5991	14.3877	13.9374	13.5825	13.4937	13.0182	16.7502	14.0626	13.8511	0.252298	-0.198029
sp|P10276|RARA_HUMAN	sp|P10276|RARA_HUMAN	sp|P10276|RARA_HUMAN	__Other	sp|P10276|RARA_HUMAN	2	1	1	1	2	1	1	3.9	2.2	2.2	50.771	462	462	0.0019876	2.0287				1522	0	0	0	RARA_HUMAN P10276	sp|P10276|RARA_HUMAN Retinoic acid receptor alpha OS=Homo sapiens OX=9606 GN=RARA PE=1 SV=2	5914	1	0	RARA	NR1B1 RAR	protein-coding	17q21.2	retinoic acid receptor alpha	.	10.5648	10.1652	9.40186	10.5322	9.36348	9.48359	7.70322	11.4744	10.2283	10.5792	-0.44392	0.686425
sp|Q6P597|KLC3_HUMAN	sp|Q6P597|KLC3_HUMAN	sp|Q6P597|KLC3_HUMAN	__Other	sp|Q6P597|KLC3_HUMAN	4	1	1	1	4	1	1	7.7	2.8	2.8	55.364	504	504	0	10.186				4435	0	0	0	KLC3_HUMAN Q6P597	sp|Q6P597|KLC3_HUMAN Kinesin light chain 3 OS=Homo sapiens OX=9606 GN=KLC3 PE=1 SV=2	147700	1	0	KLC3	KLC2 KLC2L KLCt KNS2B	protein-coding	19q13.32	kinesin light chain 3	.	12.3324	11.5776	12.1649	12.4297	9.59201	12.5259	11.7423	12.3547	10.1784	10.892	0.679957	0.944681
sp|Q16352|AINX_HUMAN	sp|Q16352|AINX_HUMAN	sp|Q16352|AINX_HUMAN	__Other	sp|Q16352|AINX_HUMAN	28	26	23	1	28	26	23	56.1	53.7	50.1	55.39	499	499	0	127.57				3832	0	0	0	AINX_HUMAN Q16352	sp|Q16352|AINX_HUMAN Alpha-internexin OS=Homo sapiens OX=9606 GN=INA PE=1 SV=2	9118	1	0	INA	NEF5 NF-66 TXBP-1	protein-coding	10q24.33	internexin neuronal intermediate filament protein alpha ||| Alpha-internexin	.	14.9218	17.1658	15.7864	15.8066	15.9726	16.1111	18.3844	15.805	17.5312	18.1341	-0.905054	-0.88483
sp|P09488|GSTM1_HUMAN	sp|P09488|GSTM1_HUMAN	sp|P09488|GSTM1_HUMAN	__Other	sp|P09488|GSTM1_HUMAN	11	11	2	1	11	11	2	49.1	49.1	8.3	25.712	218	218	0	33.699				1472	0	0	0	GSTM1_HUMAN P09488	sp|P09488|GSTM1_HUMAN Glutathione S-transferase Mu 1 OS=Homo sapiens OX=9606 GN=GSTM1 PE=1 SV=3	2944	1	0	GSTM1	GST1 GSTM1-1 GSTM1a-1a GSTM1b-1b GTH4 GTM1 H-B MU MU-1	protein-coding	1p13.3	glutathione S-transferase mu 1	.	15.8246	16.4577	16.9491	15.8146	15.9777	18.4054	15.2753	15.2701	15.161	15.364	0.921995	-0.212544
sp|P11169|GTR3_HUMAN;sp|Q8TDB8|GTR14_HUMAN	sp|P11169|GTR3_HUMAN;sp|Q8TDB8|GTR14_HUMAN	sp|P11169|GTR3_HUMAN;sp|Q8TDB8|GTR14_HUMAN	__Other	sp|P11169|GTR3_HUMAN;sp|Q8TDB8|GTR14_HUMAN	8;5	8;5	8;5	2	8	8	8	15.7	15.7	15.7	53.924	496	496;520	0	113.21				1549	0	0	0	GTR14_HUMAN Q8TDB8 GTR3_HUMAN P11169	sp|P11169|GTR3_HUMAN Solute carrier family 2, facilitated glucose transporter member 3 OS=Homo sapiens OX=9606 GN=SLC2A3 PE=1 SV=1;sp|Q8TDB8|GTR14_HUMAN Solute carrier family 2, facilitated glucose transporter member 14 OS=Homo sapiens OX=9606 GN=SLC2A14 P	144195 6515	2	2	SLC2A14 SLC2A3	GLUT14 SLC2A3P3 GLUT3	protein-coding	12p13.31	solute carrier family 2 member 14 ||| Solute carrier family 2, facilitated glucose transporter member 14 ||| solute carrier family 2 member 3 ||| Solute carrier family 2, facilitated glucose transporter member 3	.	16.3417	16.4132	16.7914	15.9138	14.9662	15.64	18.2773	15.3915	14.7833	15.8543	0.839204	-0.0384188
sp|Q05639|EF1A2_HUMAN	sp|Q05639|EF1A2_HUMAN	sp|Q05639|EF1A2_HUMAN	__Other	sp|Q05639|EF1A2_HUMAN	28	13	13	1	28	13	13	62.6	30	30	50.47	463	463	0	99.083				3151	0	0	0	EF1A2_HUMAN Q05639	sp|Q05639|EF1A2_HUMAN Elongation factor 1-alpha 2 OS=Homo sapiens OX=9606 GN=EEF1A2 PE=1 SV=1	1917	1	0	EEF1A2	EEF1AL EF-1-alpha-2 EF1A EIEE33 HS1 MRD38 STN STNL	protein-coding	20q13.33	eukaryotic translation elongation factor 1 alpha 2 ||| Elongation factor 1-alpha 2	.	16.6016	17.3657	16.0527	16.9802	17.0897	18.7537	18.5212	16.6484	15.5587	16.3945	-0.947193	-0.0197323
sp|Q9NS25|SPNXB_HUMAN	sp|Q9NS25|SPNXB_HUMAN	sp|Q9NS25|SPNXB_HUMAN	__Other	sp|Q9NS25|SPNXB_HUMAN	5	5	4	1	5	5	4	64.1	64.1	53.4	11.84	103	103	0	66.871				7431	0	0	0	SPNXB_HUMAN Q9NS25	sp|Q9NS25|SPNXB_HUMAN Sperm protein associated with the nucleus on the X chromosome B1 OS=Homo sapiens OX=9606 GN=SPANXB1 PE=2 SV=2	728695	1	0	SPANXB1	B1 CT11.2 SPANX-B SPANXB SPANXB2 SPANXF1 SPANXF2	protein-coding	Xq27.1	SPANX family member B1 ||| Sperm protein associated with the nucleus on the X chromosome B1	.	13.7401	14.4587	13.8797	13.2308	15.6505	13.3373	13.4357	16.137	13.4931	13.8073	-0.241785	-0.890613
sp|Q99456|K1C12_HUMAN;CON__P08727;CON__Q99456	CON__P08727;sp|Q99456|K1C12_HUMAN;CON__Q99456	sp|Q99456|K1C12_HUMAN;CON__P08727;CON__Q99456	__Other	CON__P08727	47;4;4	45;4;4	1;0;0	3	47	45	1	93.5	89.5	7.5	44.091	400	400;494;494	0	323.31			+	27	2	0	0	K1C12_HUMAN Q99456 P08727		3859 3880	2	2	KRT12 KRT19	K12 CK19 K19 K1CS	protein-coding	17q21.2	keratin 12 ||| Keratin, type I cytoskeletal 12 ||| keratin 19 ||| Keratin, type I cytoskeletal 19	.	20.5116	20.4186	21.6791	20.7204	19.9089	20.2582	18.5342	21.6005	19.2297	19.4283	1.50915	0.550517
sp|O43570|CAH12_HUMAN	sp|O43570|CAH12_HUMAN	sp|O43570|CAH12_HUMAN	__Other	sp|O43570|CAH12_HUMAN	7	7	7	1	7	7	7	28	28	28	39.45	354	354	0	68.991				640	0	0	0	CAH12_HUMAN O43570	sp|O43570|CAH12_HUMAN Carbonic anhydrase 12 OS=Homo sapiens OX=9606 GN=CA12 PE=1 SV=1	771	1	0	CA12	CA-XII CAXII HsT18816 T18816	protein-coding	15q22.2	carbonic anhydrase 12	.	14.1888	15.4213	15.0811	14.927	17.3469	15.6594	13.9614	13.9718	14.9656	14.1587	0.0720998	-0.082008
sp|O95183|VAMP5_HUMAN	sp|O95183|VAMP5_HUMAN	sp|O95183|VAMP5_HUMAN	__Other	sp|O95183|VAMP5_HUMAN	5	5	5	1	5	5	5	45.7	45.7	45.7	12.805	116	116	0	22.945				1093	0	0	0	VAMP5_HUMAN O95183	sp|O95183|VAMP5_HUMAN Vesicle-associated membrane protein 5 OS=Homo sapiens OX=9606 GN=VAMP5 PE=1 SV=1	10791	1	0	VAMP5	---	protein-coding	2p11.2	vesicle associated membrane protein 5 ||| Vesicle-associated membrane protein 5	.	15.0028	15.3562	14.8879	14.1864	17.2421	14.0782	14.1387	14.1123	15.8629	14.9593	-0.0455704	-0.747117
sp|P30485|1B47_HUMAN	sp|P30485|1B47_HUMAN	sp|P30485|1B47_HUMAN	__Other	sp|P30485|1B47_HUMAN	16	1	0	1	16	1	0	47.5	9.4	0	40.571	362	362	0	80.212				2042	0	0	0	---	sp|P30485|1B47_HUMAN HLA class I histocompatibility antigen, B-47 alpha chain OS=Homo sapiens OX=9606 GN=HLA-B PE=1 SV=1	---	0	1	---	---	---	---	---	.		8.98322	8.88868	10.9959	7.95629		7.4794	7.69652		8.94691	0.228057	2.33532
sp|P12830|CADH1_HUMAN	sp|P12830|CADH1_HUMAN	sp|P12830|CADH1_HUMAN	__Other	sp|P12830|CADH1_HUMAN	20	20	17	1	20	20	17	28.2	28.2	26.1	97.455	882	882	0	247.97				1591	0	0	0	CADH1_HUMAN P12830	sp|P12830|CADH1_HUMAN Cadherin-1 OS=Homo sapiens OX=9606 GN=CDH1 PE=1 SV=3	999	1	0	CDH1	Arc-1 BCDS1 CD324 CDHE ECAD LCAM UVO	protein-coding	16q22.1	cadherin 1 ||| Cadherin-1	.	18.0603	17.3092	16.1278	18.2721	16.0566	17.6099	17.0124	18.7758	16.1639	15.8898	-0.860749	1.28353
sp|Q96DR7|ARHGQ_HUMAN	sp|Q96DR7|ARHGQ_HUMAN	sp|Q96DR7|ARHGQ_HUMAN	__Other	sp|Q96DR7|ARHGQ_HUMAN	3	3	3	1	3	3	3	4	4	4	97.344	871	871	0	5.1343				5988	0	0	0	ARHGQ_HUMAN Q96DR7	sp|Q96DR7|ARHGQ_HUMAN Rho guanine nucleotide exchange factor 26 OS=Homo sapiens OX=9606 GN=ARHGEF26 PE=1 SV=4	26084	1	0	ARHGEF26	CSGEF HMFN1864 SGEF	protein-coding	3q25.2	Rho guanine nucleotide exchange factor 26	.	15.0742	13.3144	14.8109	14.2768	12.1155	12.0738	11.6216	13.1253	12.7627	13.3712	1.79118	1.25706
sp|P57729|RAB38_HUMAN	sp|P57729|RAB38_HUMAN	sp|P57729|RAB38_HUMAN	__Other	sp|P57729|RAB38_HUMAN	3	1	1	1	3	1	1	14.7	4.7	4.7	23.712	211	211	0	3.2453				2731	0	0	0	RAB38_HUMAN P57729	sp|P57729|RAB38_HUMAN Ras-related protein Rab-38 OS=Homo sapiens OX=9606 GN=RAB38 PE=1 SV=1	23682	1	0	RAB38	NY-MEL-1 rrGTPbp	protein-coding	11q14.2	RAB38, member RAS oncogene family ||| Ras-related protein Rab-38	.	13.1619	12.283	12.1478	12.4261	13.2978	12.7735	10.3944	13.6417	10.9727	11.7344	-0.0257787	0.252589
sp|P78329|CP4F2_HUMAN;sp|P98187|CP4F8_HUMAN;sp|Q08477|CP4F3_HUMAN;sp|Q6NT55|CP4FN_HUMAN;sp|Q9HBI6|CP4FB_HUMAN;sp|Q9HCS2|CP4FC_HUMAN	sp|Q9HBI6|CP4FB_HUMAN;sp|P78329|CP4F2_HUMAN;sp|Q9HCS2|CP4FC_HUMAN;sp|Q08477|CP4F3_HUMAN;sp|P98187|CP4F8_HUMAN;sp|Q6NT55|CP4FN_HUMAN	sp|P78329|CP4F2_HUMAN;sp|P98187|CP4F8_HUMAN;sp|Q08477|CP4F3_HUMAN;sp|Q6NT55|CP4FN_HUMAN;sp|Q9HBI6|CP4FB_HUMAN;sp|Q9HCS2|CP4FC_HUMAN	__Other	sp|Q9HBI6|CP4FB_HUMAN	15;5;5;4;1;1	15;5;5;4;1;1	15;5;5;4;1;1	6	15	15	15	34.4	34.4	34.4	60.145	524	524;520;524;520;520;531	0	68.022				7233	0	0	0	CP4FB_HUMAN Q9HBI6 CP4FC_HUMAN Q9HCS2 CP4F2_HUMAN P78329 CP4FN_HUMAN Q6NT55 CP4F3_HUMAN Q08477 CP4F8_HUMAN P98187	sp|Q9HBI6|CP4FB_HUMAN Cytochrome P450 4F11 OS=Homo sapiens OX=9606 GN=CYP4F11 PE=1 SV=3	57834 66002 8529 126410 4051 11283	6	2	CYP4F11 CYP4F12 CYP4F2 CYP4F22 CYP4F3 CYP4F8	CYPIVF11 CYPIVF12 F22329_1 CPF2 ARCI5 INLNE LI3 CPF3 CYP4F CYPIVF3 LTB4H CPF8 CYPIVF8	protein-coding	19p13.12	cytochrome P450 family 4 subfamily F member 11 ||| Cytochrome P450 4F11 ||| cytochrome P450 family 4 subfamily F member 12 ||| Cytochrome P450 4F12 ||| cytochrome P450 family 4 subfamily F member 2 ||| Cytochrome P450 4F2 ||| cytochrome P450 family 4 subfamily F member 22 ||| Cytochrome P450 4F22 ||| cytochrome P450 family 4 subfamily F member 3 ||| Cytochrome P450 4F3 ||| cytochrome P450 family …	.	15.8736	15.8542	14.8648	16.0014	15.0979	17.9636	14.7392	14.6106	15.228	14.9162	-0.562939	0.573664
sp|Q16270|IBP7_HUMAN	sp|Q16270|IBP7_HUMAN	sp|Q16270|IBP7_HUMAN	__Other	sp|Q16270|IBP7_HUMAN	5	5	5	1	5	5	5	26.2	26.2	26.2	29.13	282	282	0	17.358				3830	0	0	0	IBP7_HUMAN Q16270	sp|Q16270|IBP7_HUMAN Insulin-like growth factor-binding protein 7 OS=Homo sapiens OX=9606 GN=IGFBP7 PE=1 SV=1	3490	1	0	IGFBP7	AGM FSTL2 IBP-7 IGFBP-7 IGFBP-7v IGFBPRP1 MAC25 PSF RAMSVPS TAF	protein-coding	4q12	insulin like growth factor binding protein 7 ||| Insulin-like growth factor-binding protein 7	.	14.0052	14.1209	16.0738	12.8692	14.0757	12.6802	12.892	13.6653	13.112	13.8577	2.4206	-0.784065
sp|P05121|PAI1_HUMAN	sp|P05121|PAI1_HUMAN	sp|P05121|PAI1_HUMAN	__Other	sp|P05121|PAI1_HUMAN	14	14	14	1	14	14	14	45	45	45	45.059	402	402	0	154.36				1346	0	0	0	PAI1_HUMAN P05121	sp|P05121|PAI1_HUMAN Plasminogen activator inhibitor 1 OS=Homo sapiens OX=9606 GN=SERPINE1 PE=1 SV=1	5054	1	0	SERPINE1	PAI PAI-1 PAI1 PLANH1	protein-coding	7q22.1	serpin family E member 1 ||| Plasminogen activator inhibitor 1	.	16.5033	17.0254	18.2764	15.9854	16.7975	15.5793	15.6101	15.8671	15.8328	18.0765	1.77322	-0.517751
sp|P04637|P53_HUMAN	sp|P04637|P53_HUMAN	sp|P04637|P53_HUMAN	__Other	sp|P04637|P53_HUMAN	10	10	10	1	10	10	10	31	31	31	43.653	393	393	0	38.97				1326	0	0	0	P53_HUMAN P04637	sp|P04637|P53_HUMAN Cellular tumor antigen p53 OS=Homo sapiens OX=9606 GN=TP53 PE=1 SV=4	7157	1	0	TP53	BCC7 BMFS5 LFS1 P53 TRP53	protein-coding	17p13.1	tumor protein p53 ||| Cellular tumor antigen p53	.	14.8589	15.2234	14.3762	14.4761	14.0415	15.2593	17.3492	14.1189	14.2076	14.5199	-0.417406	-0.317475
sp|O76070|SYUG_HUMAN	sp|O76070|SYUG_HUMAN	sp|O76070|SYUG_HUMAN	__Other	sp|O76070|SYUG_HUMAN	8	8	6	1	8	8	6	74	74	65.4	13.331	127	127	0	19.595				1005	0	0	0	SYUG_HUMAN O76070	sp|O76070|SYUG_HUMAN Gamma-synuclein OS=Homo sapiens OX=9606 GN=SNCG PE=1 SV=2	6623	1	0	SNCG	BCSG1 SR	protein-coding	10q23.2	synuclein gamma ||| Gamma-synuclein	.	15.565	15.6813	14.2895	15.6993	14.3171	16.6526	14.5853	17.1878	14.8255	14.8735	-1.01433	0.395512
sp|P19022|CADH2_HUMAN;sp|P55283|CADH4_HUMAN	sp|P19022|CADH2_HUMAN;sp|P55283|CADH4_HUMAN	sp|P19022|CADH2_HUMAN;sp|P55283|CADH4_HUMAN	__Other	sp|P19022|CADH2_HUMAN	24;2	24;2	24;2	2	24	24	24	35.3	35.3	35.3	99.808	906	906;916	0	323.31				1770	0	0	0	CADH2_HUMAN P19022 CADH4_HUMAN P55283	sp|P19022|CADH2_HUMAN Cadherin-2 OS=Homo sapiens OX=9606 GN=CDH2 PE=1 SV=4	1000 1002	2	5	CDH2 CDH4	CD325 CDHN CDw325 NCAD CAD4 R-CAD RCAD	protein-coding	18q12.1!20q13.33	cadherin 2 ||| Cadherin-2 ||| cadherin 4 ||| Cadherin-4	.	17.0142	17.5727	18.4419	16.3118	19.2676	16.5251	16.4619	17.1408	16.2936	17.3479	1.21805	-0.912074
sp|O60656|UD19_HUMAN;sp|P19224|UD16_HUMAN;sp|P22309|UD11_HUMAN;sp|P22310|UD14_HUMAN;sp|P35503|UD13_HUMAN;sp|P35504|UD15_HUMAN;sp|Q9HAW7|UD17_HUMAN;sp|Q9HAW8|UD110_HUMAN;sp|Q9HAW9|UD18_HUMAN	sp|P19224|UD16_HUMAN;sp|Q9HAW9|UD18_HUMAN;sp|Q9HAW8|UD110_HUMAN;sp|Q9HAW7|UD17_HUMAN;sp|O60656|UD19_HUMAN;sp|P22309|UD11_HUMAN;sp|P35504|UD15_HUMAN;sp|P35503|UD13_HUMAN;sp|P22310|UD14_HUMAN	sp|O60656|UD19_HUMAN;sp|P19224|UD16_HUMAN;sp|P22309|UD11_HUMAN;sp|P22310|UD14_HUMAN;sp|P35503|UD13_HUMAN;sp|P35504|UD15_HUMAN;sp|Q9HAW7|UD17_HUMAN;sp|Q9HAW8|UD110_HUMAN;sp|Q9HAW9|UD18_HUMAN	__Other	sp|P19224|UD16_HUMAN	11;4;4;4;4;4;4;4;4	11;4;4;4;4;4;4;4;4	11;4;4;4;4;4;4;4;4	9	11	11	11	24.4	24.4	24.4	60.75	532	532;530;530;530;530;533;534;534;534	0	58.115				1773	0	0	0	UD110_HUMAN Q9HAW8 UD11_HUMAN P22309 UD13_HUMAN P35503 UD14_HUMAN P22310 UD15_HUMAN P35504 UD16_HUMAN P19224 UD17_HUMAN Q9HAW7 UD18_HUMAN Q9HAW9 UD19_HUMAN O60656	sp|P19224|UD16_HUMAN UDP-glucuronosyltransferase 1-6 OS=Homo sapiens OX=9606 GN=UGT1A6 PE=1 SV=2	54575 54658 54657 54577 54576 54600 54578 54659 54579	9	2	UGT1A10 UGT1A1 UGT1A4 UGT1A7 UGT1A8 UGT1A9 UGT1A6 UGT1A3 UGT1A5	GNT1 UDPGT UGT-1A UGT-1J UGT1 UGT1-01 UGT1-10 UGT1.1 UGT1.10 UGT1A UGT1A1 UGT1J hUG-BR1 BILIQTL1 HUG-BR1 UDPGT-1-1 HUG-BR2 UDPGT-1-4 UGT-1D UGT1-04 UGT1.4 UGT1A4S UGT1D UDPGT-1-7 UGT-1G UGT1-07 UGT1.7 UGT1G UDPGT-1-8 UGT-1H UGT1-08 UGT1.8 UGT1A8S UGT1H HLUGP4 LUGP4 UDPGT-1-9 UGT-1I UGT1-09 UGT1-9 UGT1.9 UGT1A9S UGT1AI UGT1I HLUGP HLUGP1 UDPGT-1-6 UGT-1C UGT-1E UGT1-03 UGT1-05 UGT1.3 UGT1.5 UGT1A3…	protein-coding	2q37.1	UDP glucuronosyltransferase family 1 member A10 ||| UDP-glucuronosyltransferase 1-10 ||| UDP glucuronosyltransferase family 1 member A1 ||| UDP glucuronosyltransferase family 1 member A10 ||| UDP glucuronosyltransferase family 1 member A4 ||| UDP glucuronosyltransferase family 1 member A7 ||| UDP glucuronosyltransferase family 1 member A8 ||| UDP glucuronosyltransferase family 1 member A9 ||| UDP…	.	15.7595	16.138	15.6262	15.5293	16.9268	18.0565	15.2776	14.9635	14.9979	15.1976	-0.19571	-0.292569
sp|Q9UJ72|ANX10_HUMAN	sp|Q9UJ72|ANX10_HUMAN	sp|Q9UJ72|ANX10_HUMAN	__Other	sp|Q9UJ72|ANX10_HUMAN	11	11	11	1	11	11	11	44.1	44.1	44.1	37.277	324	324	0	93.036				7976	0	0	0	ANX10_HUMAN Q9UJ72	sp|Q9UJ72|ANX10_HUMAN Annexin A10 OS=Homo sapiens OX=9606 GN=ANXA10 PE=1 SV=3	11199	1	0	ANXA10	ANX14	protein-coding	4q32.3	annexin A10	.	15.4089	16.0076	15.1983	15.1479	17.6335	17.016	14.8615	14.7693	14.8958	15.1503	-0.385784	-0.436183
sp|P05937|CALB1_HUMAN;sp|P22676|CALB2_HUMAN	sp|P22676|CALB2_HUMAN;sp|P05937|CALB1_HUMAN	sp|P05937|CALB1_HUMAN;sp|P22676|CALB2_HUMAN	__Other	sp|P22676|CALB2_HUMAN	20;1	20;1	20;1	2	20	20	20	61.3	61.3	61.3	31.54	271	271;261	0	95.259				1857	0	0	0	CALB1_HUMAN P05937 CALB2_HUMAN P22676	sp|P22676|CALB2_HUMAN Calretinin OS=Homo sapiens OX=9606 GN=CALB2 PE=2 SV=2	793 794	2	5	CALB1 CALB2	CALB D-28K CAB29 CAL2 CR	protein-coding	8q21.3!16q22.2	calbindin 1 ||| Calbindin ||| calbindin 2 ||| Calretinin	.	16.5494	17.1499	16.3405	16.152	18.5583	18.2147	15.8056	17.458	16.5484	15.6938	-0.505887	-0.694402
sp|O43556|SGCE_HUMAN	sp|O43556|SGCE_HUMAN	sp|O43556|SGCE_HUMAN	__Other	sp|O43556|SGCE_HUMAN	1	1	1	1	1	1	1	2.3	2.3	2.3	49.85	437	437	0	3.0675				638	0	0	0	SGCE_HUMAN O43556	sp|O43556|SGCE_HUMAN Epsilon-sarcoglycan OS=Homo sapiens OX=9606 GN=SGCE PE=1 SV=6	8910	1	0	SGCE	DYT11 ESG epsilon-SG	protein-coding	7q21.3	sarcoglycan epsilon ||| Epsilon-sarcoglycan	.	11.5084	11.4992	11.9945	11.9945	11.4957	9.37949	11.3785	12.2486	9.63558	11.6036	0.778188	0.778179
sp|Q13069|GAGE5_HUMAN;sp|Q13070|GAGE6_HUMAN	sp|Q13070|GAGE6_HUMAN;sp|Q13069|GAGE5_HUMAN	sp|Q13069|GAGE5_HUMAN;sp|Q13070|GAGE6_HUMAN	__Other	sp|Q13069|GAGE5_HUMAN;sp|Q13070|GAGE6_HUMAN	2;2	2;2	1;1	2	2	2	1	36.8	36.8	29.1	12.892	117	117;117	0	35.585				3312	0	0	0	GAGE5_HUMAN Q13069 GAGE6_HUMAN Q13070	sp|Q13070|GAGE6_HUMAN G antigen 6 OS=Homo sapiens OX=9606 GN=GAGE6 PE=1 SV=1;sp|Q13069|GAGE5_HUMAN G antigen 5 OS=Homo sapiens OX=9606 GN=GAGE5 PE=1 SV=1	2576 2577 2578	3	2	GAGE4 GAGE5 GAGE6	CT4.4 CT4.5 CT4.6	protein-coding	Xp11.4-p11.2	G antigen 4 ||| G antigen 5 ||| G antigen 6	.	12.884	12.5853	11.8996	11.3329	11.4289	11.6548	11.5846	14.7083	12.199	11.9275	-0.192312	-0.759071
sp|P52943|CRIP2_HUMAN	sp|P52943|CRIP2_HUMAN	sp|P52943|CRIP2_HUMAN	__Other	sp|P52943|CRIP2_HUMAN	5	5	5	1	5	5	5	25.5	25.5	25.5	22.492	208	208	0	53.936				2591	0	0	0	CRIP2_HUMAN P52943	sp|P52943|CRIP2_HUMAN Cysteine-rich protein 2 OS=Homo sapiens OX=9606 GN=CRIP2 PE=1 SV=1	1397	1	0	CRIP2	CRIP CRP2 ESP1	protein-coding	14q32.33	cysteine rich protein 2 ||| Cysteine-rich protein 2	.	16.205	15.7944	16.1291	16.5355	14.34	15.1192	14.2379	17.304	14.9307	14.9768	0.682495	1.08883
sp|Q9Y365|STA10_HUMAN	sp|Q9Y365|STA10_HUMAN	sp|Q9Y365|STA10_HUMAN	__Other	sp|Q9Y365|STA10_HUMAN	4	4	4	1	4	4	4	19.9	19.9	19.9	33.048	291	291	0	9.181				8312	0	0	0	STA10_HUMAN Q9Y365	sp|Q9Y365|STA10_HUMAN START domain-containing protein 10 OS=Homo sapiens OX=9606 GN=STARD10 PE=1 SV=2	10809	1	0	STARD10	CGI-52 NY-CO-28 PCTP2 SDCCAG28	protein-coding	11q13.4	StAR related lipid transfer domain containing 10 ||| START domain-containing protein 10	.	13.2338	13.4251	12.6675	13.5921	12.2591	15.2906	12.4103	13.6159	11.9784	12.4177	-0.361433	0.563181
sp|Q9P0M6|H2AW_HUMAN	sp|Q9P0M6|H2AW_HUMAN	sp|Q9P0M6|H2AW_HUMAN	__Other	sp|Q9P0M6|H2AW_HUMAN	7	5	5	1	7	5	5	23.9	16.9	16.9	40.058	372	372	0	81.903				7732	0	0	0	H2AW_HUMAN Q9P0M6	sp|Q9P0M6|H2AW_HUMAN Core histone macro-H2A.2 OS=Homo sapiens OX=9606 GN=H2AFY2 PE=1 SV=3	55506	1	0	MACROH2A2	H2AFY2	protein-coding	10q22.1	macroH2A.2 histone ||| Core histone macro-H2A.2	.	13.0582	15.3617	14.0165	14.4139	13.8113	15.6134	15.3719	13.7518	13.936	16.7472	-0.691279	-0.293813
sp|Q14244|MAP7_HUMAN	sp|Q14244|MAP7_HUMAN	sp|Q14244|MAP7_HUMAN	__Other	sp|Q14244|MAP7_HUMAN	19	17	17	1	19	17	17	22.7	21.6	21.6	84.051	749	749	0	36.857				3538	0	0	0	MAP7_HUMAN Q14244	sp|Q14244|MAP7_HUMAN Ensconsin OS=Homo sapiens OX=9606 GN=MAP7 PE=1 SV=1	9053	1	0	MAP7	E-MAP-115 EMAP115	protein-coding	6q23.3	microtubule associated protein 7 ||| Ensconsin	.	16.6098	16.6314	15.5418	16.7945	15.3888	18.5502	16.5176	16.2472	15.4399	15.3928	-0.692313	0.560366
sp|Q02539|H11_HUMAN	sp|Q02539|H11_HUMAN	sp|Q02539|H11_HUMAN	__Other	sp|Q02539|H11_HUMAN	8	2	2	1	8	2	2	24.7	9.8	9.8	21.842	215	215	0	3.8116				3098	0	0	0	H11_HUMAN Q02539	sp|Q02539|H11_HUMAN Histone H1.1 OS=Homo sapiens OX=9606 GN=HIST1H1A PE=1 SV=3	3024	1	0	H1-1	H1.1 H1A H1F1 HIST1 HIST1H1A	protein-coding	6p22.2	H1.1 linker histone, cluster member ||| Histone H1.1	.	14.5557	13.3927	13.7302	14.9468	13.4188	11.9223	11.5297	13.8777	13.1043	13.3402	0.496436	1.71309
sp|P30487|1B49_HUMAN;sp|P30488|1B50_HUMAN	sp|P30488|1B50_HUMAN;sp|P30487|1B49_HUMAN	sp|P30487|1B49_HUMAN;sp|P30488|1B50_HUMAN	__Other	sp|P30487|1B49_HUMAN;sp|P30488|1B50_HUMAN	16;16	1;1	0;0	2	16	1	0	50.8	9.4	0	40.541	362	362;362	0	105.44				2043	0	0	0	---	sp|P30488|1B50_HUMAN HLA class I histocompatibility antigen, B-50 alpha chain OS=Homo sapiens OX=9606 GN=HLA-B PE=1 SV=1;sp|P30487|1B49_HUMAN HLA class I histocompatibility antigen, B-49 alpha chain OS=Homo sapiens OX=9606 GN=HLA-B PE=1 SV=2	---	0	1	---	---	---	---	---	.		10.5718	9.50342	9.20012	9.01197	10.2086	12.4745	9.79928	9.63253	9.72367	-0.440847	-0.744152
sp|P47895|AL1A3_HUMAN	sp|P47895|AL1A3_HUMAN	sp|P47895|AL1A3_HUMAN	__Other	sp|P47895|AL1A3_HUMAN	27	25	23	1	27	25	23	56.4	54.7	52.5	56.108	512	512	0	230.77				2355	0	0	0	AL1A3_HUMAN P47895	sp|P47895|AL1A3_HUMAN Aldehyde dehydrogenase family 1 member A3 OS=Homo sapiens OX=9606 GN=ALDH1A3 PE=1 SV=2	220	1	0	ALDH1A3	ALDH1A6 ALDH6 MCOP8 RALDH3	protein-coding	15q26.3	aldehyde dehydrogenase 1 family member A3 ||| Aldehyde dehydrogenase family 1 member A3	.	17.1116	18.1724	17.7193	16.9996	19.7376	16.7782	16.6854	18.6796	17.6161	18.6134	-0.134391	-0.854093
sp|P27658|CO8A1_HUMAN	sp|P27658|CO8A1_HUMAN	sp|P27658|CO8A1_HUMAN	__Other	sp|P27658|CO8A1_HUMAN	3	3	3	1	3	3	3	4.6	4.6	4.6	73.363	744	744	0	3.5033				1955	0	0	0	CO8A1_HUMAN P27658	sp|P27658|CO8A1_HUMAN Collagen alpha-1(VIII) chain OS=Homo sapiens OX=9606 GN=COL8A1 PE=1 SV=2	1295	1	0	COL8A1	C3orf7	protein-coding	3q12.1	collagen type VIII alpha 1 chain ||| Collagen alpha-1(VIII) chain	.	12.4039	13.7791	15.5095	12.4941	12.8768	12.674	12.7744	14.5855	12.8967	13.3199	2.11811	-0.897245
sp|Q02952|AKA12_HUMAN	sp|Q02952|AKA12_HUMAN	sp|Q02952|AKA12_HUMAN	__Other	sp|Q02952|AKA12_HUMAN	82	82	82	1	82	82	82	57.9	57.9	57.9	191.48	1782	1782	0	323.31				3107	0	0	0	AKA12_HUMAN Q02952	sp|Q02952|AKA12_HUMAN A-kinase anchor protein 12 OS=Homo sapiens OX=9606 GN=AKAP12 PE=1 SV=4	9590	1	0	AKAP12	AKAP250 SSeCKS	protein-coding	6q25.1	A-kinase anchoring protein 12 ||| A-kinase anchor protein 12	.	18.5858	19.2687	18.4723	18.5023	19.0178	18.7334	21.3226	17.9027	17.9694	18.6722	-0.351786	-0.321741
sp|Q8IZW8|TENS4_HUMAN	sp|Q8IZW8|TENS4_HUMAN	sp|Q8IZW8|TENS4_HUMAN	__Other	sp|Q8IZW8|TENS4_HUMAN	3	3	3	1	3	3	3	5	5	5	76.763	715	715	0	27.733				5072	0	0	0	TENS4_HUMAN Q8IZW8	sp|Q8IZW8|TENS4_HUMAN Tensin-4 OS=Homo sapiens OX=9606 GN=TNS4 PE=1 SV=3	84951	1	0	TNS4	CTEN PP14434	protein-coding	17q21.2	tensin 4 ||| Tensin-4	.	14.436	13.856	12.6256	14.1646	12.7725	14.0594	12.2643	14.8169	14.9163	12.6334	-0.906039	0.632994
sp|Q7LFL8|CXXC5_HUMAN	sp|Q7LFL8|CXXC5_HUMAN	sp|Q7LFL8|CXXC5_HUMAN	__Other	sp|Q7LFL8|CXXC5_HUMAN	2	2	2	1	2	2	2	10.6	10.6	10.6	32.977	322	322	0	10.171				4672	0	0	0	CXXC5_HUMAN Q7LFL8	sp|Q7LFL8|CXXC5_HUMAN CXXC-type zinc finger protein 5 OS=Homo sapiens OX=9606 GN=CXXC5 PE=1 SV=1	51523	1	0	CXXC5	CF5 HSPC195 RINF WID	protein-coding	5q31.2	CXXC finger protein 5 ||| CXXC-type zinc finger protein 5	.		11.2862	11.2101	10.9627	9.93681	11.3164	8.86661	11.6504	12.287	11.4029	0.255947	0.00856678
sp|Q12756|KIF1A_HUMAN	sp|Q12756|KIF1A_HUMAN	sp|Q12756|KIF1A_HUMAN	__Other	sp|Q12756|KIF1A_HUMAN	18	9	9	1	18	9	9	12.4	6.4	6.4	191.06	1690	1690	0	13.429				3246	0	0	0	KIF1A_HUMAN Q12756	sp|Q12756|KIF1A_HUMAN Kinesin-like protein KIF1A OS=Homo sapiens OX=9606 GN=KIF1A PE=1 SV=2	547	1	0	KIF1A	ATSV C2orf20 HSN2C MRD9 SPG30 UNC104	protein-coding	2q37.3	kinesin family member 1A ||| Kinesin-like protein KIF1A	.	13.6806	14.6024	13.7798	13.6631	13.5506	14.2234	16.6487	13.6162	13.4202	13.5959	-0.282458	-0.39917
sp|O76087|GAGE7_HUMAN;sp|P0CL80|GG12F_HUMAN;sp|P0CL81|GG12G_HUMAN;sp|P0CL82|GG12I_HUMAN;sp|Q13065|GAGE1_HUMAN;sp|Q4V326|GAG2E_HUMAN	sp|Q4V326|GAG2E_HUMAN;sp|Q13065|GAGE1_HUMAN;sp|P0CL82|GG12I_HUMAN;sp|P0CL81|GG12G_HUMAN;sp|P0CL80|GG12F_HUMAN;sp|O76087|GAGE7_HUMAN	sp|O76087|GAGE7_HUMAN;sp|P0CL80|GG12F_HUMAN;sp|P0CL81|GG12G_HUMAN;sp|P0CL82|GG12I_HUMAN;sp|Q13065|GAGE1_HUMAN;sp|Q4V326|GAG2E_HUMAN	__Other	sp|O76087|GAGE7_HUMAN;sp|P0CL80|GG12F_HUMAN;sp|P0CL81|GG12G_HUMAN;sp|P0CL82|GG12I_HUMAN;sp|Q13065|GAGE1_HUMAN;sp|Q4V326|GAG2E_HUMAN	2;2;2;2;2;2	1;1;1;1;1;1	1;1;1;1;1;1	6	2	1	1	39.1	30.9	30.9	12.217	110	110;117;117;117;117;117	0	17.828				1010	0	0	0	GAGE7_HUMAN O76087 GG12F_HUMAN GG12G_HUMAN GG12I_HUMAN P0CL80 P0CL81 P0CL82 GAG2E_HUMAN Q4V326 GAGE1_HUMAN Q13065	sp|Q4V326|GAG2E_HUMAN G antigen 2E OS=Homo sapiens OX=9606 GN=GAGE2E PE=3 SV=2;sp|Q13065|GAGE1_HUMAN G antigen 1 OS=Homo sapiens OX=9606 GN=GAGE1 PE=1 SV=3;sp|P0CL82|GG12I_HUMAN G antigen 12I OS=Homo sapiens OX=9606 GN=GAGE12I PE=1 SV=1;sp|P0CL81|GG12G_HUM	729428 100008586 645073 26748 2579 26749 2576 2543	8	2	GAGE12B GAGE12F GAGE12G GAGE12I GAGE7 GAGE2E GAGE4 GAGE1	GAGE-12B AL4 CT4.7 GAGE-7 GAGE-7B GAGE-8 GAGE7 GAGE7B GAGE-12G GAGE-2E GAGE8 CT4.4 CT4.1 GAGE-1 GAGE-4 GAGE4	protein-coding	Xp11.23!Xp11.4-p11.2	G antigen 12B ||| G antigen 12F ||| G antigen 12G ||| G antigen 12I ||| G antigen 7 ||| G antigen 12F ||| G antigen 2E ||| G antigen 4 ||| G antigen 1	.		9.87507	9.67993	9.34279	9.0613		8.87637	12.1589	9.0114	9.2839	0.0492697	-0.28787
sp|P01891|1A68_HUMAN;sp|P30511|HLAF_HUMAN	sp|P01891|1A68_HUMAN;sp|P30511|HLAF_HUMAN	sp|P01891|1A68_HUMAN;sp|P30511|HLAF_HUMAN	__Other	sp|P01891|1A68_HUMAN	24;4	2;0	2;0	2	24	2	2	58.1	7.1	7.1	40.908	365	365;346	0	4.9068				1274	0	0	0	HLAF_HUMAN P30511	sp|P01891|1A68_HUMAN HLA class I histocompatibility antigen, A-68 alpha chain OS=Homo sapiens OX=9606 GN=HLA-A PE=1 SV=4	3134	1	0	HLA-F	CDA12 HLA-5.4 HLA-CDA12 HLAF	protein-coding	6p22.1	major histocompatibility complex, class I, F ||| HLA class I histocompatibility antigen, alpha chain F	.	16.0522	13.7141	13.1099	15.6665	13.0468	12.5108	12.0694	13.6133	13.3622	12.989	-0.18611	2.37051
sp|Q8IXS6|PALM2_HUMAN	sp|Q8IXS6|PALM2_HUMAN	sp|Q8IXS6|PALM2_HUMAN	__Other	sp|Q8IXS6|PALM2_HUMAN	7	7	6	1	7	7	6	20.3	20.3	18.5	42.185	379	379	0	28.995				5014	0	0	0	PALM2_HUMAN Q8IXS6	sp|Q8IXS6|PALM2_HUMAN Paralemmin-2 OS=Homo sapiens OX=9606 GN=PALM2 PE=1 SV=3	445815	1	0	PALM2AKAP2	AKAP-2 AKAP-KL AKAP2 AKAPKL MISP2 PALM2 PALM2-AKAP2 PRKA2	protein-coding	9q31.3	PALM2 and AKAP2 fusion ||| Paralemmin-2	.	13.7344	14.8278	14.185	13.444	16.0075	13.3599	14.5725	13.3126	15.5497	15.3326	-0.285422	-1.02648
sp|Q13938|CAYP1_HUMAN	sp|Q13938|CAYP1_HUMAN	sp|Q13938|CAYP1_HUMAN	__Other	sp|Q13938|CAYP1_HUMAN	6	6	6	1	6	6	6	22.5	22.5	22.5	30.24	275	275	0	26.463				3482	0	0	0	CAYP1_HUMAN Q13938	sp|Q13938|CAYP1_HUMAN Calcyphosin OS=Homo sapiens OX=9606 GN=CAPS PE=1 SV=2	828	1	0	CAPS	CAPS1	protein-coding	19p13.3	calcyphosine ||| Calcyphosin	.	15.8621	14.6265	15.6254	16.4011	13.6875	13.7626	13.611	14.5818	13.6672	13.8133	1.23163	2.00733
sp|Q9H939|PPIP2_HUMAN	sp|Q9H939|PPIP2_HUMAN	sp|Q9H939|PPIP2_HUMAN	__Other	sp|Q9H939|PPIP2_HUMAN	1	1	1	1	1	1	1	3.3	3.3	3.3	38.858	334	334	0.0013685	2.0772				7160	0	0	0	PPIP2_HUMAN Q9H939	sp|Q9H939|PPIP2_HUMAN Proline-serine-threonine phosphatase-interacting protein 2 OS=Homo sapiens OX=9606 GN=PSTPIP2 PE=1 SV=4	9050	1	0	PSTPIP2	MAYP	protein-coding	18q21.1|tdb7990	proline-serine-threonine phosphatase interacting protein 2 ||| Proline-serine-threonine phosphatase-interacting protein 2	.		10.8944	11.1011	9.74538	12.3421	9.07587	10.4103	11.1051	9.5184	9.91774	0.699109	-0.656622
sp|P01892|1A02_HUMAN	sp|P01892|1A02_HUMAN	sp|P01892|1A02_HUMAN	__Other	sp|P01892|1A02_HUMAN	26	3	0	1	26	3	0	59.5	7.7	0	40.921	365	365	0	12.44				1275	0	0	0	---	sp|P01892|1A02_HUMAN HLA class I histocompatibility antigen, A-2 alpha chain OS=Homo sapiens OX=9606 GN=HLA-A PE=1 SV=1	---	0	1	---	---	---	---	---	.	12.4563	14.0391	12.9228	12.5512	15.1004	14.1326	13.7061	15.2126	12.4622	13.4622	-0.770928	-1.14261
sp|Q9NZ53|PDXL2_HUMAN	sp|Q9NZ53|PDXL2_HUMAN	sp|Q9NZ53|PDXL2_HUMAN	__Other	sp|Q9NZ53|PDXL2_HUMAN	3	3	3	1	3	3	3	8.3	8.3	8.3	65.075	605	605	0	4.5596				7678	0	0	0	PDXL2_HUMAN Q9NZ53	sp|Q9NZ53|PDXL2_HUMAN Podocalyxin-like protein 2 OS=Homo sapiens OX=9606 GN=PODXL2 PE=1 SV=1	50512	1	0	PODXL2	EG PODLX2	protein-coding	3q21.3	podocalyxin like 2 ||| Podocalyxin-like protein 2	.		9.24631	7.69981		10.008	9.48536	9.96564	9.80578	10.3044	7.57644	-1.56382	NA
sp|O00339|MATN2_HUMAN	sp|O00339|MATN2_HUMAN	sp|O00339|MATN2_HUMAN	__Other	sp|O00339|MATN2_HUMAN	4	4	4	1	4	4	4	5	5	5	106.84	956	956	0	9.7321				322	0	0	0	MATN2_HUMAN O00339	sp|O00339|MATN2_HUMAN Matrilin-2 OS=Homo sapiens OX=9606 GN=MATN2 PE=1 SV=4	4147	1	0	MATN2	---	protein-coding	8q22.1-q22.2	matrilin 2 ||| Matrilin-2	.	13.6381	14.0828	16.1208	13.0323	12.8945	12.8634	13.1677	13.6555	13.7984	13.6614	2.47155	-0.616962
sp|Q8WWA1|TMM40_HUMAN	sp|Q8WWA1|TMM40_HUMAN	sp|Q8WWA1|TMM40_HUMAN	__Other	sp|Q8WWA1|TMM40_HUMAN	1	1	1	1	1	1	1	7.7	7.7	7.7	25.495	233	233	0	11.449				5619	0	0	0	TMM40_HUMAN Q8WWA1	sp|Q8WWA1|TMM40_HUMAN Transmembrane protein 40 OS=Homo sapiens OX=9606 GN=TMEM40 PE=1 SV=2	55287	1	0	TMEM40	---	protein-coding	3p25.2	transmembrane protein 40	.		10.5195	10.2612	10.3199	9.02111	11.4431	11.7572	11.3078	8.99594	9.87311	-0.111185	-0.0525273
sp|P22223|CADH3_HUMAN	sp|P22223|CADH3_HUMAN	sp|P22223|CADH3_HUMAN	__Other	sp|P22223|CADH3_HUMAN	13	10	10	1	13	10	10	22.4	20.1	20.1	91.417	829	829	0	174.1				1845	0	0	0	CADH3_HUMAN P22223	sp|P22223|CADH3_HUMAN Cadherin-3 OS=Homo sapiens OX=9606 GN=CDH3 PE=1 SV=2	1001	1	0	CDH3	CDHP HJMD PCAD	protein-coding	16q22.1	cadherin 3 ||| Cadherin-3	.	16.9809	15.8346	14.9322	17.186	14.7595	15.5523	15.2374	17.2594	14.795	14.7544	-0.627296	1.62646
sp|Q15517|CDSN_HUMAN;sp|Q9NZI8|IF2B1_HUMAN;REV__sp|Q15833|STXB2_HUMAN	sp|Q9NZI8|IF2B1_HUMAN;sp|Q15517|CDSN_HUMAN;REV__sp|Q15833|STXB2_HUMAN	sp|Q15517|CDSN_HUMAN;sp|Q9NZI8|IF2B1_HUMAN;REV__sp|Q15833|STXB2_HUMAN	__REV	sp|Q9NZI8|IF2B1_HUMAN	27;1;1	24;1;1	24;1;1	3	27	24	24	49	43.7	43.7	63.48	577	577;529;593	0	166.05				7689	0	0	0	CDSN_HUMAN Q15517 IF2B1_HUMAN Q9NZI8 STXB2_HUMAN Q15833	sp|Q9NZI8|IF2B1_HUMAN Insulin-like growth factor 2 mRNA-binding protein 1 OS=Homo sapiens OX=9606 GN=IGF2BP1 PE=1 SV=2	1041 10642 6813	3	5	CDSN IGF2BP1 STXBP2	HTSS HTSS1 HYPT2 PSS PSS1 S CRD-BP CRDBP IMP-1 IMP1 VICKZ1 ZBP1 FHL5 Hunc18b MUNC18-2 UNC18-2 UNC18B pp10122	protein-coding	6p21.33!17q21.32!19p13.2	corneodesmosin ||| insulin like growth factor 2 mRNA binding protein 1 ||| Insulin-like growth factor 2 mRNA-binding protein 1 ||| syntaxin binding protein 2 ||| Syntaxin-binding protein 2	.	16.4659	17.1624	16.0786	16.0241	17.267	16.6242	19.1195	15.901	16.2429	16.7089	-0.667189	-0.721709
sp|P58107|EPIPL_HUMAN	sp|P58107|EPIPL_HUMAN	sp|P58107|EPIPL_HUMAN	__Other	sp|P58107|EPIPL_HUMAN	112	104	104	1	112	104	104	61.5	55.1	55.1	555.65	5088	5088	0	323.31				2738	0	0	0	EPIPL_HUMAN P58107	sp|P58107|EPIPL_HUMAN Epiplakin OS=Homo sapiens OX=9606 GN=EPPK1 PE=1 SV=3	83481	1	0	EPPK1	EPIPL EPIPL1	protein-coding	8q24.3	epiplakin 1 ||| Epiplakin	.	18.9412	19.4438	18.6316	18.7222	18.2521	20.4011	18.7891	21.1182	18.5171	18.3618	-0.467524	-0.376916
sp|Q3ZCQ3|F174B_HUMAN	sp|Q3ZCQ3|F174B_HUMAN	sp|Q3ZCQ3|F174B_HUMAN	__Other	sp|Q3ZCQ3|F174B_HUMAN	1	1	1	1	1	1	1	13.8	13.8	13.8	16.966	159	159	0.0013683	2.0771				3971	0	0	0	F174B_HUMAN Q3ZCQ3	sp|Q3ZCQ3|F174B_HUMAN Membrane protein FAM174B OS=Homo sapiens OX=9606 GN=FAM174B PE=2 SV=2	400451	1	0	FAM174B	---	protein-coding	15q26.1	family with sequence similarity 174 member B ||| Membrane protein FAM174B	.		9.79581	8.81116	9.33157	10.4191	11.5843	9.40961	8.04913	9.68967	9.34284	-0.768509	-0.248094
sp|A8MQ03|CRTP1_HUMAN	sp|A8MQ03|CRTP1_HUMAN	sp|A8MQ03|CRTP1_HUMAN	__Other	sp|A8MQ03|CRTP1_HUMAN	1	1	1	1	1	1	1	18.1	18.1	18.1	15.313	144	144	0	21.001				253	0	0	0	CRTP1_HUMAN A8MQ03	sp|A8MQ03|CRTP1_HUMAN Cysteine-rich tail protein 1 OS=Homo sapiens OX=9606 GN=CYSRT1 PE=1 SV=1	375791	1	0	CYSRT1	C9orf169	protein-coding	9q34.3	cysteine rich tail 1 ||| Cysteine-rich tail protein 1	.		9.23228	8.31598		8.18673	9.20346		11.2155	7.82458		-0.633266	NA
sp|P48681|NEST_HUMAN	sp|P48681|NEST_HUMAN	sp|P48681|NEST_HUMAN	__Other	sp|P48681|NEST_HUMAN	79	79	79	1	79	79	79	54	54	54	177.44	1621	1621	0	323.31				2382	0	0	0	NEST_HUMAN P48681	sp|P48681|NEST_HUMAN Nestin OS=Homo sapiens OX=9606 GN=NES PE=1 SV=2	10763	1	0	NES	Nbla00170	protein-coding	1q23.1	nestin	.	19.9756	19.6396	18.942	20.0494	21.4595	18.2377	18.8831	19.7866	18.3776	19.0262	-0.403272	0.704093
sp|Q13642|FHL1_HUMAN	sp|Q13642|FHL1_HUMAN	sp|Q13642|FHL1_HUMAN	__Other	sp|Q13642|FHL1_HUMAN	14	14	14	1	14	14	14	45.2	45.2	45.2	36.263	323	323	0	143.5				3451	0	0	0	FHL1_HUMAN Q13642	sp|Q13642|FHL1_HUMAN Four and a half LIM domains protein 1 OS=Homo sapiens OX=9606 GN=FHL1 PE=1 SV=4	2273	1	0	FHL1	FCMSU FHL-1 FHL1A FHL1B FLH1A KYOT RBMX1A RBMX1B SLIM SLIM-1 SLIM1 SLIMMER XMPMA	protein-coding	Xq26.3	four and a half LIM domains 1 ||| Four and a half LIM domains protein 1	.	17.9274	17.4288	16.851	17.8841	16.415	16.7777	19.306	16.2763	16.0983	17.0353	-0.229449	0.803628
sp|Q8N1P7|CRBG2_HUMAN	sp|Q8N1P7|CRBG2_HUMAN	sp|Q8N1P7|CRBG2_HUMAN	__Other	sp|Q8N1P7|CRBG2_HUMAN	2	2	2	1	2	2	2	2.1	2.1	2.1	177.91	1661	1661	0.0048544	1.4264				5103	0	0	0	CRBG2_HUMAN Q8N1P7	sp|Q8N1P7|CRBG2_HUMAN Beta/gamma crystallin domain-containing protein 2 OS=Homo sapiens OX=9606 GN=CRYBG2 PE=2 SV=2	55057	1	0	CRYBG2	AIM1L	protein-coding	1p36.11	crystallin beta-gamma domain containing 2 ||| Beta/gamma crystallin domain-containing protein 2	.		10.3072	9.89121	10.1124	9.32771	12	8.8173	11.1675	9.60311	9.37073	-0.145037	0.0761919
sp|P55058|PLTP_HUMAN	sp|P55058|PLTP_HUMAN	sp|P55058|PLTP_HUMAN	__Other	sp|P55058|PLTP_HUMAN	2	2	2	1	2	2	2	5.3	5.3	5.3	54.739	493	493	0	8.6739				2664	0	0	0	PLTP_HUMAN P55058	sp|P55058|PLTP_HUMAN Phospholipid transfer protein OS=Homo sapiens OX=9606 GN=PLTP PE=1 SV=1	5360	1	0	PLTP	BPIFE HDLCQ9	protein-coding	20q13.12	phospholipid transfer protein	.	11.1735	11.4972	10.8913	10.6773	12.6876	12.3012	12.7309	11.3576	10.6554	9.91897	-0.511216	-0.725251
sp|Q9NVH6|TMLH_HUMAN	sp|Q9NVH6|TMLH_HUMAN	sp|Q9NVH6|TMLH_HUMAN	__Other	sp|Q9NVH6|TMLH_HUMAN	7	7	7	1	7	7	7	14.7	14.7	14.7	49.517	421	421	0	6.3314				7517	0	0	0	TMLH_HUMAN Q9NVH6	sp|Q9NVH6|TMLH_HUMAN Trimethyllysine dioxygenase, mitochondrial OS=Homo sapiens OX=9606 GN=TMLHE PE=1 SV=1	55217	1	0	TMLHE	AUTSX6 BBOX2 TMLD TMLH TMLHED XAP130	protein-coding	Xq28	trimethyllysine hydroxylase, epsilon ||| Trimethyllysine dioxygenase, mitochondrial	.	15.1684	14.547	13.3252	15.6141	15.6291	13.2019	14.3778	13.1906	15.1652	13.9466	-0.981079	1.30781
sp|P15924|DESP_HUMAN	sp|P15924|DESP_HUMAN	sp|P15924|DESP_HUMAN	__Other	sp|P15924|DESP_HUMAN	150	150	150	1	150	150	150	52.9	52.9	52.9	331.77	2871	2871	0	323.31				1681	0	0	0	DESP_HUMAN P15924	sp|P15924|DESP_HUMAN Desmoplakin OS=Homo sapiens OX=9606 GN=DSP PE=1 SV=3	1832	1	0	DSP	DCWHKTA DP	protein-coding	6p24.3	desmoplakin	.	20.5159	19.9908	19.0696	20.852	18.6711	21.3919	19.8213	20.4881	18.7569	18.9234	-0.677141	1.10518
sp|Q16890|TPD53_HUMAN	sp|Q16890|TPD53_HUMAN	sp|Q16890|TPD53_HUMAN	__Other	sp|Q16890|TPD53_HUMAN	5	5	5	1	5	5	5	26.5	26.5	26.5	22.449	204	204	0	15.013				3898	0	0	0	TPD53_HUMAN Q16890	sp|Q16890|TPD53_HUMAN Tumor protein D53 OS=Homo sapiens OX=9606 GN=TPD52L1 PE=1 SV=1	7164	1	0	TPD52L1	D53	protein-coding	6q22.31	TPD52 like 1 ||| Tumor protein D53	.	15.8597	15.5888	14.6895	16.0996	15.9266	17.3103	14.3622	14.9772	15.0711	14.1805	-0.637619	0.772488
sp|O95274|LYPD3_HUMAN	sp|O95274|LYPD3_HUMAN	sp|O95274|LYPD3_HUMAN	__Other	sp|O95274|LYPD3_HUMAN	6	6	6	1	6	6	6	23.4	23.4	23.4	35.97	346	346	0	12.665				1112	0	0	0	LYPD3_HUMAN O95274	sp|O95274|LYPD3_HUMAN Ly6/PLAUR domain-containing protein 3 OS=Homo sapiens OX=9606 GN=LYPD3 PE=1 SV=2	27076	1	0	LYPD3	C4.4A	protein-coding	19q13.31	LY6/PLAUR domain containing 3 ||| Ly6/PLAUR domain-containing protein 3	.	15.1965	14.8168	13.5757	15.2156	13.8263	16.2497	13.5975	15.7092	14.5493	13.745	-0.982845	0.657084
sp|P05091|ALDH2_HUMAN	sp|P05091|ALDH2_HUMAN	sp|P05091|ALDH2_HUMAN	__Other	sp|P05091|ALDH2_HUMAN	27	27	22	1	27	27	22	61.3	61.3	57.8	56.381	517	517	0	323.31				1340	0	0	0	ALDH2_HUMAN P05091	sp|P05091|ALDH2_HUMAN Aldehyde dehydrogenase, mitochondrial OS=Homo sapiens OX=9606 GN=ALDH2 PE=1 SV=2	217	1	0	ALDH2	ALDH-E2 ALDHI ALDM	protein-coding	12q24.12	aldehyde dehydrogenase 2 family member ||| Aldehyde dehydrogenase, mitochondrial	.	18.8375	18.4284	17.6125	19.0076	20.0187	18.3483	16.8356	16.9656	18.1679	18.1532	-0.526171	0.868888
sp|Q92765|SFRP3_HUMAN	sp|Q92765|SFRP3_HUMAN	sp|Q92765|SFRP3_HUMAN	__Other	sp|Q92765|SFRP3_HUMAN	1	1	1	1	1	1	1	4	4	4	36.254	325	325	0.00012793	2.8078				5740	0	0	0	SFRP3_HUMAN Q92765	sp|Q92765|SFRP3_HUMAN Secreted frizzled-related protein 3 OS=Homo sapiens OX=9606 GN=FRZB PE=1 SV=2	2487	1	0	FRZB	FRE FRITZ FRP-3 FRZB-1 FRZB-PEN FRZB1 FZRB OS1 SFRP3 SRFP3 hFIZ	protein-coding	2q32.1	frizzled related protein ||| Secreted frizzled-related protein 3	.		9.31988	8.89892	8.21826	8.01653	8.66729	9.21115	8.70477	9.21472	11.4107	-0.143883	-0.824535
sp|Q96B21|TM45B_HUMAN	sp|Q96B21|TM45B_HUMAN	sp|Q96B21|TM45B_HUMAN	__Other	sp|Q96B21|TM45B_HUMAN	1	1	1	1	1	1	1	2.9	2.9	2.9	31.826	275	275	0.0075531	1.1807				5894	0	0	0	TM45B_HUMAN Q96B21	sp|Q96B21|TM45B_HUMAN Transmembrane protein 45B OS=Homo sapiens OX=9606 GN=TMEM45B PE=1 SV=1	120224	1	0	TMEM45B	---	protein-coding	11q24.3	transmembrane protein 45B	.	13.1514	13.6152	12.7131	13.266	14.1594	15.4105	12.3446	12.749	12.4152	12.9286	-0.535207	0.0177257
sp|O00625|PIR_HUMAN	sp|O00625|PIR_HUMAN	sp|O00625|PIR_HUMAN	__Other	sp|O00625|PIR_HUMAN	13	13	13	1	13	13	13	57.6	57.6	57.6	32.113	290	290	0	87.85				367	0	0	0	PIR_HUMAN O00625	sp|O00625|PIR_HUMAN Pirin OS=Homo sapiens OX=9606 GN=PIR PE=1 SV=1	8544	1	0	PIR	---	protein-coding	Xp22.2	pirin	.	16.6374	16.9391	16.0483	16.4513	18.3741	18.1716	16.1552	15.587	16.2573	16.0043	-0.582804	-0.17984
sp|P05187|PPB1_HUMAN;sp|P09923|PPBI_HUMAN;sp|P10696|PPBN_HUMAN	sp|P05187|PPB1_HUMAN;sp|P10696|PPBN_HUMAN;sp|P09923|PPBI_HUMAN	sp|P05187|PPB1_HUMAN;sp|P09923|PPBI_HUMAN;sp|P10696|PPBN_HUMAN	__Other	sp|P05187|PPB1_HUMAN;sp|P10696|PPBN_HUMAN	9;7;1	9;7;1	9;7;1	3	9	9	9	25.4	25.4	25.4	57.953	535	535;532;528	0	66.277				1352	0	0	0	PPBN_HUMAN P10696 PPBI_HUMAN P09923 PPB1_HUMAN P05187	sp|P05187|PPB1_HUMAN Alkaline phosphatase, placental type OS=Homo sapiens OX=9606 GN=ALPP PE=1 SV=2;sp|P10696|PPBN_HUMAN Alkaline phosphatase, germ cell type OS=Homo sapiens OX=9606 GN=ALPG PE=2 SV=4	251 248 250	3	2	ALPG ALPI ALPP	ALPPL ALPPL2 GCAP IAP ALP ALPI PALP PLAP PLAP-1	protein-coding	2q37.1	alkaline phosphatase, germ cell ||| Alkaline phosphatase, germ cell type ||| alkaline phosphatase, intestinal ||| alkaline phosphatase, placental ||| Intestinal-type alkaline phosphatase ||| alkaline phosphatase, placental ||| Alkaline phosphatase, placental type	.	13.3839	14.2885	16.0212	13.6616	13.4453	14.9062	13.0248	14.4465	13.3303	13.172	2.02021	-0.339384
sp|Q15506|SP17_HUMAN	sp|Q15506|SP17_HUMAN	sp|Q15506|SP17_HUMAN	__Other	sp|Q15506|SP17_HUMAN	4	4	4	1	4	4	4	31.8	31.8	31.8	17.406	151	151	0	14.598				3749	0	0	0	SP17_HUMAN Q15506	sp|Q15506|SP17_HUMAN Sperm surface protein Sp17 OS=Homo sapiens OX=9606 GN=SPA17 PE=1 SV=1	53340	1	0	SPA17	CT22 SP17 SP17-1	protein-coding	11q24.2	sperm autoantigenic protein 17 ||| Sperm surface protein Sp17	.		12.5614	12.5093	10.711	13.022	12.2637	10.5302	12.1159	12.6274	13.4792	0.351953	-1.44637
sp|P01903|DRA_HUMAN;sp|P01906|DQA2_HUMAN	sp|P01903|DRA_HUMAN;sp|P01906|DQA2_HUMAN	sp|P01903|DRA_HUMAN;sp|P01906|DQA2_HUMAN	__Other	sp|P01903|DRA_HUMAN	5;1	5;1	5;1	2	5	5	5	25.2	25.2	25.2	28.607	254	254;255	0	17.97				1276	0	0	0	DQA2_HUMAN P01906 DRA_HUMAN P01903	sp|P01903|DRA_HUMAN HLA class II histocompatibility antigen, DR alpha chain OS=Homo sapiens OX=9606 GN=HLA-DRA PE=1 SV=1	3118 3122	2	2	HLA-DQA2 HLA-DRA	DC-alpha DX-ALPHA HLA-DCA HLA-DXA HLADQA2 HLA-DRA1	protein-coding	6p21.32	major histocompatibility complex, class II, DQ alpha 2 ||| HLA class II histocompatibility antigen, DQ alpha 2 chain ||| major histocompatibility complex, class II, DR alpha ||| HLA class II histocompatibility antigen, DR alpha chain	.	15.1041	13.647	14.3052	15.3261	12.5507	12.7903	12.3411	12.8669	13.9166	12.8554	0.936151	1.95709
sp|P20908|CO5A1_HUMAN	sp|P20908|CO5A1_HUMAN	sp|P20908|CO5A1_HUMAN	__Other	sp|P20908|CO5A1_HUMAN	19	19	19	1	19	19	19	17.7	17.7	17.7	183.56	1838	1838	0	88.122				1816	0	0	0	CO5A1_HUMAN P20908	sp|P20908|CO5A1_HUMAN Collagen alpha-1(V) chain OS=Homo sapiens OX=9606 GN=COL5A1 PE=1 SV=3	1289	1	0	COL5A1	EDSC EDSCL1	protein-coding	9q34.3	collagen type V alpha 1 chain ||| Collagen alpha-1(V) chain	.	15.0656	15.8289	17.8309	14.64	15.1547	14.6797	14.7352	15.29	15.6139	15.4098	2.41168	-0.779319
sp|Q93062|RBPMS_HUMAN	sp|Q93062|RBPMS_HUMAN	sp|Q93062|RBPMS_HUMAN	__Other	sp|Q93062|RBPMS_HUMAN	4	4	4	1	4	4	4	30.6	30.6	30.6	21.802	196	196	0	21.492				5808	0	0	0	RBPMS_HUMAN Q93062	sp|Q93062|RBPMS_HUMAN RNA-binding protein with multiple splicing OS=Homo sapiens OX=9606 GN=RBPMS PE=1 SV=1	11030	1	0	RBPMS	HERMES	protein-coding	8p12	RNA binding protein, mRNA processing factor ||| RNA-binding protein with multiple splicing	.	12.051	13.6131	14.5176	12.0251	13.9761	12.6856	11.9241	14.5401	13.3277	12.8243	1.29002	-1.20249
sp|Q92887|MRP2_HUMAN	sp|Q92887|MRP2_HUMAN	sp|Q92887|MRP2_HUMAN	__Other	sp|Q92887|MRP2_HUMAN	12	12	11	1	12	12	11	10.4	10.4	9.8	174.21	1545	1545	0	38.568				5771	0	0	0	MRP2_HUMAN Q92887	sp|Q92887|MRP2_HUMAN Canalicular multispecific organic anion transporter 1 OS=Homo sapiens OX=9606 GN=ABCC2 PE=1 SV=3	1244	1	0	ABCC2	ABC30 CMOAT DJS MRP2 cMRP	protein-coding	10q24.2	ATP binding cassette subfamily C member 2 ||| Canalicular multispecific organic anion transporter 1	.	14.7602	15.4642	14.6385	14.8563	15.7545	17.3286	14.5195	14.2025	14.4307	14.5306	-0.394142	-0.176363
sp|Q5T0W9|FA83B_HUMAN	sp|Q5T0W9|FA83B_HUMAN	sp|Q5T0W9|FA83B_HUMAN	__Other	sp|Q5T0W9|FA83B_HUMAN	4	4	4	1	4	4	4	3.9	3.9	3.9	114.8	1011	1011	0	6.0608				4154	0	0	0	FA83B_HUMAN Q5T0W9	sp|Q5T0W9|FA83B_HUMAN Protein FAM83B OS=Homo sapiens OX=9606 GN=FAM83B PE=1 SV=1	222584	1	0	FAM83B	C6orf143	protein-coding	6p12.1	family with sequence similarity 83 member B ||| Protein FAM83B	.	13.5194	12.8204	11.7276	14.4345	11.822	13.4628	11.5638	13.2477	12.1484	11.9773	-0.820421	1.88648
sp|Q86SQ7|SDCG8_HUMAN	sp|Q86SQ7|SDCG8_HUMAN	sp|Q86SQ7|SDCG8_HUMAN	__Other	sp|Q86SQ7|SDCG8_HUMAN	3	3	3	1	3	3	3	4.9	4.9	4.9	82.681	713	713	0	3.035				4773	0	0	0	SDCG8_HUMAN Q86SQ7	sp|Q86SQ7|SDCG8_HUMAN Serologically defined colon cancer antigen 8 OS=Homo sapiens OX=9606 GN=SDCCAG8 PE=1 SV=1	10806	1	0	SDCCAG8	BBS16 CCCAP CCCAP-SLSN7 HSPC085 NPHP10 NY-CO-8 SLSN7 hCCCAP	protein-coding	1q43-q44	serologically defined colon cancer antigen 8	.	13.2327	13.7104	14.9663	13.835	13.5278	13.6005	12.0439	14.9346	12.5909	12.9709	1.40759	0.276283
sp|Q9NUU6|OTULL_HUMAN	sp|Q9NUU6|OTULL_HUMAN	sp|Q9NUU6|OTULL_HUMAN	__Other	sp|Q9NUU6|OTULL_HUMAN	11	11	11	1	11	11	11	35.7	35.7	35.7	42.195	356	356	0	44.183				7491	0	0	0	OTULL_HUMAN Q9NUU6	sp|Q9NUU6|OTULL_HUMAN Inactive ubiquitin thioesterase OTULINL OS=Homo sapiens OX=9606 GN=OTULINL PE=1 SV=1	54491	1	0	OTULINL	FAM105A NET20	protein-coding	5p15.2	OTU deubiquitinase with linear linkage specificity like ||| Inactive ubiquitin thioesterase OTULINL	.	15.0251	15.5365	14.2605	14.4145	15.5781	14.3299	14.5151	15.4108	17.3342	14.776	-0.816853	-0.66291
sp|P13796|PLSL_HUMAN	sp|P13796|PLSL_HUMAN	sp|P13796|PLSL_HUMAN	__Other	sp|P13796|PLSL_HUMAN	29	22	21	1	29	22	21	56.8	47	45.1	70.288	627	627	0	142.04				1617	0	0	0	PLSL_HUMAN P13796	sp|P13796|PLSL_HUMAN Plastin-2 OS=Homo sapiens OX=9606 GN=LCP1 PE=1 SV=6	3936	1	0	LCP1	CP64 HEL-S-37 L-PLASTIN LC64P LPL PLS2	protein-coding	13q14.13	lymphocyte cytosolic protein 1 ||| Plastin-2	.	17.4372	17.6194	16.8527	16.787	17.0264	16.8225	16.7708	19.7607	17.0292	16.6818	-0.363656	-0.429362
sp|Q9Y2B2|PIGL_HUMAN	sp|Q9Y2B2|PIGL_HUMAN	sp|Q9Y2B2|PIGL_HUMAN	__Other	sp|Q9Y2B2|PIGL_HUMAN	3	3	3	1	3	3	3	20.6	20.6	20.6	28.531	252	252	0	9.4905				8238	0	0	0	PIGL_HUMAN Q9Y2B2	sp|Q9Y2B2|PIGL_HUMAN N-acetylglucosaminyl-phosphatidylinositol de-N-acetylase OS=Homo sapiens OX=9606 GN=PIGL PE=1 SV=1	9487	1	0	PIGL	CHIME	protein-coding	17p11.2	phosphatidylinositol glycan anchor biosynthesis class L ||| N-acetylglucosaminyl-phosphatidylinositol de-N-acetylase	.		11.6648	10.7631	11.6882	12.7673	12.6067	11.5299	11.0712	10.1578	9.98386	-0.557947	0.367173
sp|O60234|GMFG_HUMAN	sp|O60234|GMFG_HUMAN	sp|O60234|GMFG_HUMAN	__Other	sp|O60234|GMFG_HUMAN	3	1	1	1	3	1	1	38	12.7	12.7	16.801	142	142	0.00012773	2.7781				712	0	0	0	GMFG_HUMAN O60234	sp|O60234|GMFG_HUMAN Glia maturation factor gamma OS=Homo sapiens OX=9606 GN=GMFG PE=1 SV=1	9535	1	0	GMFG	GMF-GAMMA	protein-coding	19q13.2	glia maturation factor gamma	.		10.1025	9.60854	8.96193	8.76326	9.38508	8.50404	9.20308	9.82304	11.8212	0.0997721	-0.54684
sp|O94808|GFPT2_HUMAN	sp|O94808|GFPT2_HUMAN	sp|O94808|GFPT2_HUMAN	__Other	sp|O94808|GFPT2_HUMAN	27	22	22	1	27	22	22	47.8	36.1	36.1	76.93	682	682	0	82.735				1024	0	0	0	GFPT2_HUMAN O94808	sp|O94808|GFPT2_HUMAN Glutamine--fructose-6-phosphate aminotransferase [isomerizing] 2 OS=Homo sapiens OX=9606 GN=GFPT2 PE=1 SV=3	9945	1	0	GFPT2	GFAT GFAT-2 GFAT2	protein-coding	5q35.3	glutamine-fructose-6-phosphate transaminase 2 ||| Glutamine--fructose-6-phosphate aminotransferase [isomerizing] 2	.	15.7804	16.7193	16.5448	16.054	17.6762	15.1384	15.1973	15.6119	17.4067	17.3786	0.168796	-0.321948
sp|Q9Y6K8|KAD5_HUMAN	sp|Q9Y6K8|KAD5_HUMAN	sp|Q9Y6K8|KAD5_HUMAN	__Other	sp|Q9Y6K8|KAD5_HUMAN	2	1	1	1	2	1	1	3.9	2.3	2.3	63.332	562	562	0.00062996	2.4258				8544	0	0	0	KAD5_HUMAN Q9Y6K8	sp|Q9Y6K8|KAD5_HUMAN Adenylate kinase isoenzyme 5 OS=Homo sapiens OX=9606 GN=AK5 PE=1 SV=2	26289	1	0	AK5	AK6	protein-coding	1p31.1	adenylate kinase 5 ||| Adenylate kinase isoenzyme 5	.		9.50231	10.782	8.67137	10.5528	8.52429	8.23207	8.46577	9.41038	10.1961	1.42761	-0.682967
sp|Q6ZMP0|THSD4_HUMAN	sp|Q6ZMP0|THSD4_HUMAN	sp|Q6ZMP0|THSD4_HUMAN	__Other	sp|Q6ZMP0|THSD4_HUMAN	2	2	2	1	2	2	2	1.8	1.8	1.8	112.45	1018	1018	0.0039034	1.5771				4552	0	0	0	THSD4_HUMAN Q6ZMP0	sp|Q6ZMP0|THSD4_HUMAN Thrombospondin type-1 domain-containing protein 4 OS=Homo sapiens OX=9606 GN=THSD4 PE=2 SV=2	79875	1	0	THSD4	ADAMTSL-6 ADAMTSL6 FVSY9334 PRO34005	protein-coding	15q23	thrombospondin type 1 domain containing 4 ||| Thrombospondin type-1 domain-containing protein 4	.		11.0262	12.1563	10.7463	11.9904	10.4569	11.2777	11.0332	9.34267	9.53424	1.33908	-0.0709152
sp|Q9NZN4|EHD2_HUMAN	sp|Q9NZN4|EHD2_HUMAN	sp|Q9NZN4|EHD2_HUMAN	__Other	sp|Q9NZN4|EHD2_HUMAN	28	25	25	1	28	25	25	62.6	57.6	57.6	61.161	543	543	0	323.31				7702	0	0	0	EHD2_HUMAN Q9NZN4	sp|Q9NZN4|EHD2_HUMAN EH domain-containing protein 2 OS=Homo sapiens OX=9606 GN=EHD2 PE=1 SV=2	30846	1	0	EHD2	PAST2	protein-coding	19q13.33	EH domain containing 2 ||| EH domain-containing protein 2	.	17.7278	17.5032	19.3601	17.9539	17.1308	16.3206	16.3159	16.8325	17.078	16.5535	2.16695	0.760742
sp|P43363|MAGAA_HUMAN	sp|P43363|MAGAA_HUMAN	sp|P43363|MAGAA_HUMAN	__Other	sp|P43363|MAGAA_HUMAN	6	3	3	1	6	3	3	16.3	9.8	9.8	40.78	369	369	0	7.104				2305	0	0	0	MAGAA_HUMAN P43363	sp|P43363|MAGAA_HUMAN Melanoma-associated antigen 10 OS=Homo sapiens OX=9606 GN=MAGEA10 PE=2 SV=2	4109	1	0	MAGEA10	CT1.10 MAGE10	protein-coding	Xq28	MAGE family member A10 ||| Melanoma-associated antigen 10	.	14.4409	14.4457	14.3755	13.2731	16.4992	13.7628	13.9944	13.5607	13.758	13.5558	0.278114	-0.824329
sp|Q92876|KLK6_HUMAN	sp|Q92876|KLK6_HUMAN	sp|Q92876|KLK6_HUMAN	__Other	sp|Q92876|KLK6_HUMAN	4	4	4	1	4	4	4	21.3	21.3	21.3	26.855	244	244	0	31.946				5767	0	0	0	KLK6_HUMAN Q92876	sp|Q92876|KLK6_HUMAN Kallikrein-6 OS=Homo sapiens OX=9606 GN=KLK6 PE=1 SV=1	5653	1	0	KLK6	Bssp Klk7 PRSS18 PRSS9 SP59 hK6	protein-coding	19q13.41	kallikrein related peptidase 6 ||| Kallikrein-6	.	12.2673	12.9802	12.3321	12.4882	12.0455	12.1476	12.0908	15.0848	12.1926	12.2202	-0.243145	-0.0869923
sp|P24821|TENA_HUMAN	sp|P24821|TENA_HUMAN	sp|P24821|TENA_HUMAN	__Other	sp|P24821|TENA_HUMAN	51	51	51	1	51	51	51	34.5	34.5	34.5	240.85	2201	2201	0	323.31				1904	0	0	0	TENA_HUMAN P24821	sp|P24821|TENA_HUMAN Tenascin OS=Homo sapiens OX=9606 GN=TNC PE=1 SV=3	3371	1	0	TNC	150-225 DFNA56 GMEM GP HXB JI TN TN-C	protein-coding	9q33.1	tenascin C ||| Tenascin	.	18.4159	18.2498	18.3997	18.626	17.4832	16.7334	16.8159	19.8421	17.7082	18.1349	0.431758	0.658048
sp|Q14194|DPYL1_HUMAN	sp|Q14194|DPYL1_HUMAN	sp|Q14194|DPYL1_HUMAN	__Other	sp|Q14194|DPYL1_HUMAN	8	4	4	1	8	4	4	15.4	7.7	7.7	62.183	572	572	0	7.2531				3527	0	0	0	DPYL1_HUMAN Q14194	sp|Q14194|DPYL1_HUMAN Dihydropyrimidinase-related protein 1 OS=Homo sapiens OX=9606 GN=CRMP1 PE=1 SV=1	1400	1	0	CRMP1	CRMP-1 DPYSL1 DRP-1 DRP1 ULIP-3	protein-coding	4p16.2	collapsin response mediator protein 1 ||| Dihydropyrimidinase-related protein 1	.	13.3747	13.8752	12.9609	12.7727	12.7648	13.478	15.428	12.8848	13.0044	14.761	-0.545892	-0.734109
sp|P27487|DPP4_HUMAN	sp|P27487|DPP4_HUMAN	sp|P27487|DPP4_HUMAN	__Other	sp|P27487|DPP4_HUMAN	8	8	8	1	8	8	8	9.5	9.5	9.5	88.278	766	766	0	9.3819				1952	0	0	0	DPP4_HUMAN P27487	sp|P27487|DPP4_HUMAN Dipeptidyl peptidase 4 OS=Homo sapiens OX=9606 GN=DPP4 PE=1 SV=2	1803	1	0	DPP4	ADABP ADCP2 CD26 DPPIV TP103	protein-coding	2q24.2	dipeptidyl peptidase 4	.	15.6148	15.6288	16.375	15.7944	17.2915	14.4097	14.4322	15.492	14.7489	14.895	0.945127	0.364602
sp|Q2TB90|HKDC1_HUMAN	sp|Q2TB90|HKDC1_HUMAN	sp|Q2TB90|HKDC1_HUMAN	__Other	sp|Q2TB90|HKDC1_HUMAN	22	18	18	1	22	18	18	25.5	23	23	102.54	917	917	0	32.478				3936	0	0	0	HKDC1_HUMAN Q2TB90	sp|Q2TB90|HKDC1_HUMAN Hexokinase HKDC1 OS=Homo sapiens OX=9606 GN=HKDC1 PE=1 SV=3	80201	1	0	HKDC1	---	protein-coding	10q22.1	hexokinase domain containing 1 ||| Hexokinase HKDC1	.	17.7034	16.0907	15.9646	18.0732	15.1875	16.1016	15.0389	15.3114	15.1964	15.1313	0.213993	2.32255
sp|Q3MIR4|CC50B_HUMAN	sp|Q3MIR4|CC50B_HUMAN	sp|Q3MIR4|CC50B_HUMAN	__Other	sp|Q3MIR4|CC50B_HUMAN	2	1	1	1	2	1	1	6.3	4	4	38.941	351	351	0	6.7134				3961	0	0	0	CC50B_HUMAN Q3MIR4	sp|Q3MIR4|CC50B_HUMAN Cell cycle control protein 50B OS=Homo sapiens OX=9606 GN=TMEM30B PE=1 SV=1	161291	1	0	TMEM30B	CDC50B	protein-coding	14q23.1	transmembrane protein 30B ||| Cell cycle control protein 50B	.		9.16335	8.29125	10.1694	7.59802	9.75576	7.99456	10.2679	8.52742	8.7618	-0.629513	1.24862
sp|Q96LA8|ANM6_HUMAN	sp|Q96LA8|ANM6_HUMAN	sp|Q96LA8|ANM6_HUMAN	__Other	sp|Q96LA8|ANM6_HUMAN	2	2	2	1	2	2	2	9.6	9.6	9.6	41.937	375	375	0	22.614				6215	0	0	0	ANM6_HUMAN Q96LA8	sp|Q96LA8|ANM6_HUMAN Protein arginine N-methyltransferase 6 OS=Homo sapiens OX=9606 GN=PRMT6 PE=1 SV=1	55170	1	0	PRMT6	HRMT1L6	protein-coding	1p13.3	protein arginine methyltransferase 6 ||| Protein arginine N-methyltransferase 6	.	12.7568	12.9626	12.1287	13.06	13.5636	13.4107	12.9484	13.7679	10.6795	12.2057	-0.591903	0.339413
sp|Q92633|LPAR1_HUMAN	sp|Q92633|LPAR1_HUMAN	sp|Q92633|LPAR1_HUMAN	__Other	sp|Q92633|LPAR1_HUMAN	1	1	1	1	1	1	1	3.6	3.6	3.6	41.109	364	364	0.0059265	1.3505				5720	0	0	0	LPAR1_HUMAN Q92633	sp|Q92633|LPAR1_HUMAN Lysophosphatidic acid receptor 1 OS=Homo sapiens OX=9606 GN=LPAR1 PE=1 SV=3	1902	1	0	LPAR1	EDG2 GPR26 Gpcr26 LPA1 Mrec1.3 VZG1 edg-2 rec.1.3 vzg-1	protein-coding	9q31.3	lysophosphatidic acid receptor 1	.		8.86984	10.5213		7.44801	9.41591		8.87788	10.562	8.83027	1.24538	NA
sp|P15153|RAC2_HUMAN	sp|P15153|RAC2_HUMAN	sp|P15153|RAC2_HUMAN	__Other	sp|P15153|RAC2_HUMAN	10	4	4	1	10	4	4	53.6	23.4	23.4	21.429	192	192	0	15.451				1659	0	0	0	RAC2_HUMAN P15153	sp|P15153|RAC2_HUMAN Ras-related C3 botulinum toxin substrate 2 OS=Homo sapiens OX=9606 GN=RAC2 PE=1 SV=1	5880	1	0	RAC2	EN-7 Gx HSPC022 p21-Rac2	protein-coding	22q13.1	Rac family small GTPase 2 ||| Ras-related C3 botulinum toxin substrate 2	.	15.1815	14.8873	14.8376	16.0239	14.1223	13.3635	13.0753	15.5161	14.7359	15.0102	0.251968	1.43824
sp|P08727|K1C19_HUMAN	sp|P08727|K1C19_HUMAN	sp|P08727|K1C19_HUMAN	__Other	sp|P08727|K1C19_HUMAN	47	1	1	1	47	1	1	93.5	7.5	7.5	44.105	400	400	0	110.11				1452	0	0	0	K1C19_HUMAN P08727	sp|P08727|K1C19_HUMAN Keratin, type I cytoskeletal 19 OS=Homo sapiens OX=9606 GN=KRT19 PE=1 SV=4	3880	1	0	KRT19	CK19 K19 K1CS	protein-coding	17q21.2	keratin 19 ||| Keratin, type I cytoskeletal 19	.	14.9483	15.1445	14.6488	14.2112	16.493	16.2824	14.133	13.9186	15.0153	14.1204	-0.204032	-0.641677
sp|Q09160|1A80_HUMAN	sp|Q09160|1A80_HUMAN	sp|Q09160|1A80_HUMAN	__Other	sp|Q09160|1A80_HUMAN	23	7	5	1	23	7	5	52.9	23.8	17.3	40.791	365	365	0	44.648				3220	0	0	0	---	sp|Q09160|1A80_HUMAN HLA class I histocompatibility antigen, A-80 alpha chain OS=Homo sapiens OX=9606 GN=HLA-A PE=1 SV=1	---	0	1	---	---	---	---	---	.	14.9004	15.1802	15.3218	14.1102	14.5394	14.9693	16.9867	14.1513	14.0942	14.0365	0.545587	-0.665974
sp|P55085|PAR2_HUMAN	sp|P55085|PAR2_HUMAN	sp|P55085|PAR2_HUMAN	__Other	sp|P55085|PAR2_HUMAN	3	3	3	1	3	3	3	8.1	8.1	8.1	44.126	397	397	0	8.3913				2670	0	0	0	PAR2_HUMAN P55085	sp|P55085|PAR2_HUMAN Proteinase-activated receptor 2 OS=Homo sapiens OX=9606 GN=F2RL1 PE=1 SV=1	2150	1	0	F2RL1	GPR11 PAR2	protein-coding	5q13.3	F2R like trypsin receptor 1 ||| Proteinase-activated receptor 2	.	14.457	13.6887	13.0124	14.8268	12.9243	12.5669	13.7528	14.111	11.9337	14.5219	-0.44384	1.37058
sp|Q8N271|PROM2_HUMAN	sp|Q8N271|PROM2_HUMAN	sp|Q8N271|PROM2_HUMAN	__Other	sp|Q8N271|PROM2_HUMAN	8	8	8	1	8	8	8	11.3	11.3	11.3	91.882	834	834	0	11.929				5110	0	0	0	PROM2_HUMAN Q8N271	sp|Q8N271|PROM2_HUMAN Prominin-2 OS=Homo sapiens OX=9606 GN=PROM2 PE=1 SV=1	150696	1	0	PROM2	PROML2	protein-coding	2q11.1	prominin 2 ||| Prominin-2	.	14.9618	14.5195	13.7299	15.16	13.447	14.5038	13.5946	16.2703	13.7079	13.5512	-0.515736	0.914452
sp|Q6UX15|LAYN_HUMAN	sp|Q6UX15|LAYN_HUMAN	sp|Q6UX15|LAYN_HUMAN	__Other	sp|Q6UX15|LAYN_HUMAN	2	2	2	1	2	2	2	6	6	6	43.108	382	382	0	7.0723				4520	0	0	0	LAYN_HUMAN Q6UX15	sp|Q6UX15|LAYN_HUMAN Layilin OS=Homo sapiens OX=9606 GN=LAYN PE=2 SV=1	143903	1	0	LAYN	---	protein-coding	11q23.1	layilin	.	12.6518	13.0476	14.9372	12.5862	12.5898	12.5347	11.742	12.5733	11.7142	13.0633	2.21964	-0.131393
sp|Q9BYX4|IFIH1_HUMAN	sp|Q9BYX4|IFIH1_HUMAN	sp|Q9BYX4|IFIH1_HUMAN	__Other	sp|Q9BYX4|IFIH1_HUMAN	1	1	1	1	1	1	1	2	2	2	116.69	1025	1025	0	4.9456				6795	0	0	0	IFIH1_HUMAN Q9BYX4	sp|Q9BYX4|IFIH1_HUMAN Interferon-induced helicase C domain-containing protein 1 OS=Homo sapiens OX=9606 GN=IFIH1 PE=1 SV=3	64135	1	0	IFIH1	AGS7 Hlcd IDDM19 MDA-5 MDA5 RLR-2 SGMRT1	protein-coding	2q24.2	interferon induced with helicase C domain 1 ||| Interferon-induced helicase C domain-containing protein 1	.		9.32966	9.83719	9.67491	9.03974	8.55873	7.21713	10.5638	8.99328	8.61982	0.774121	0.611841
sp|Q9NRS4|TMPS4_HUMAN	sp|Q9NRS4|TMPS4_HUMAN	sp|Q9NRS4|TMPS4_HUMAN	__Other	sp|Q9NRS4|TMPS4_HUMAN	2	2	2	1	2	2	2	8.5	8.5	8.5	48.246	437	437	0	47.797				7411	0	0	0	TMPS4_HUMAN Q9NRS4	sp|Q9NRS4|TMPS4_HUMAN Transmembrane protease serine 4 OS=Homo sapiens OX=9606 GN=TMPRSS4 PE=1 SV=2	56649	1	0	TMPRSS4	CAPH2 MT-SP2 TMPRSS3	protein-coding	11q23.3	transmembrane serine protease 4 ||| Transmembrane protease serine 4	.		11.8019	11.3303	11.3336	11.2408	12.4598	10.9843	13.8251	11.2418	10.7998	-0.321606	-0.31837
sp|P28161|GSTM2_HUMAN	sp|P28161|GSTM2_HUMAN	sp|P28161|GSTM2_HUMAN	__Other	sp|P28161|GSTM2_HUMAN	10	4	4	1	10	4	4	44	22	22	25.744	218	218	0	3.7533				1971	0	0	0	GSTM2_HUMAN P28161	sp|P28161|GSTM2_HUMAN Glutathione S-transferase Mu 2 OS=Homo sapiens OX=9606 GN=GSTM2 PE=1 SV=2	2946	1	0	GSTM2	GST4 GSTM GSTM2-2 GTHMUS	protein-coding	1p13.3	glutathione S-transferase mu 2	.	13.0134	13.9955	15.4948	13.4879	14.9006	12.9103	12.9336	13.3243	12.8741	14.3324	1.71253	-0.294325
sp|Q86YB8|ERO1B_HUMAN	sp|Q86YB8|ERO1B_HUMAN	sp|Q86YB8|ERO1B_HUMAN	__Other	sp|Q86YB8|ERO1B_HUMAN	3	2	2	1	3	2	2	7.1	4.7	4.7	53.543	467	467	0	4.507				4898	0	0	0	ERO1B_HUMAN Q86YB8	sp|Q86YB8|ERO1B_HUMAN ERO1-like protein beta OS=Homo sapiens OX=9606 GN=ERO1B PE=1 SV=2	56605	1	0	ERO1B	ERO1LB Ero1beta	protein-coding	1q42.3	endoplasmic reticulum oxidoreductase 1 beta ||| ERO1-like protein beta	.		10.9125	10.2022	10.3432	11.7407	10.3716	11.6896	9.44345	9.10838	11.484	-0.345714	-0.204641
sp|Q99856|ARI3A_HUMAN	sp|Q99856|ARI3A_HUMAN	sp|Q99856|ARI3A_HUMAN	__Other	sp|Q99856|ARI3A_HUMAN	1	1	1	1	1	1	1	2.2	2.2	2.2	62.888	593	593	0	6.5872				6461	0	0	0	ARI3A_HUMAN Q99856	sp|Q99856|ARI3A_HUMAN AT-rich interactive domain-containing protein 3A OS=Homo sapiens OX=9606 GN=ARID3A PE=1 SV=2	1820	1	0	ARID3A	BRIGHT DRIL1 DRIL3 E2FBP1	protein-coding	19p13.3	AT-rich interaction domain 3A ||| AT-rich interactive domain-containing protein 3A	.		10.2945	9.86505	8.92264	10.9819	9.61935	12.0784	10.2967	10.3702	9.29682	-0.313827	-1.25624
sp|Q6Q4G3|AMPQ_HUMAN	sp|Q6Q4G3|AMPQ_HUMAN	sp|Q6Q4G3|AMPQ_HUMAN	__Other	sp|Q6Q4G3|AMPQ_HUMAN	4	4	4	1	4	4	4	4.9	4.9	4.9	113.28	990	990	0	10.707				4485	0	0	0	AMPQ_HUMAN Q6Q4G3	sp|Q6Q4G3|AMPQ_HUMAN Aminopeptidase Q OS=Homo sapiens OX=9606 GN=LVRN PE=1 SV=4	206338	1	0	LVRN	APQ AQPEP TAQPEP	protein-coding	5q23.1	laeverin ||| Aminopeptidase Q	.	13.1366	13.0537	12.706	12.5337	15.0931	12.3551	12.0282	12.3479	12.1536	12.1766	0.0317425	-0.140601
sp|Q16787|LAMA3_HUMAN	sp|Q16787|LAMA3_HUMAN	sp|Q16787|LAMA3_HUMAN	__Other	sp|Q16787|LAMA3_HUMAN	44	43	43	1	44	43	43	16.5	16.1	16.1	366.65	3333	3333	0	216.4				3883	0	0	0	LAMA3_HUMAN Q16787	sp|Q16787|LAMA3_HUMAN Laminin subunit alpha-3 OS=Homo sapiens OX=9606 GN=LAMA3 PE=1 SV=2	3909	1	0	LAMA3	BM600 E170 LAMNA LOCS	protein-coding	18q11.2	laminin subunit alpha 3 ||| Laminin subunit alpha-3	.	18.1083	17.4837	16.7788	18.3521	16.9479	16.9547	16.4227	19.221	16.8372	16.4416	-0.465691	1.10764
sp|P30464|1B15_HUMAN;sp|P30484|1B46_HUMAN;sp|P30490|1B52_HUMAN	sp|P30464|1B15_HUMAN;sp|P30484|1B46_HUMAN;sp|P30490|1B52_HUMAN	sp|P30464|1B15_HUMAN;sp|P30484|1B46_HUMAN;sp|P30490|1B52_HUMAN	__Other	sp|P30464|1B15_HUMAN;sp|P30484|1B46_HUMAN;sp|P30490|1B52_HUMAN	19;18;13	9;8;7	0;0;0	3	19	9	0	53.9	32.9	0	40.388	362	362;362;362	0	290.21				2040	0	0	0	---	sp|P30464|1B15_HUMAN HLA class I histocompatibility antigen, B-15 alpha chain OS=Homo sapiens OX=9606 GN=HLA-B PE=1 SV=2;sp|P30484|1B46_HUMAN HLA class I histocompatibility antigen, B-46 alpha chain OS=Homo sapiens OX=9606 GN=HLA-B PE=1 SV=1;sp|P30490|1B52	---	0	1	---	---	---	---	---	.	16.3652	16.3724	17.7205	16.8075	15.3532	14.5692	16.6517	16.7078	15.8419	15.593	1.56486	0.651929
sp|P15941|MUC1_HUMAN	sp|P15941|MUC1_HUMAN	sp|P15941|MUC1_HUMAN	__Other	sp|P15941|MUC1_HUMAN	4	4	4	1	4	4	4	5	5	5	122.1	1255	1255	0	35.985				1683	0	0	0	MUC1_HUMAN P15941	sp|P15941|MUC1_HUMAN Mucin-1 OS=Homo sapiens OX=9606 GN=MUC1 PE=1 SV=3	4582	1	0	MUC1	ADMCKD ADMCKD1 CA-15-3 CD227 EMA H23AG KL-6 MAM6 MCD MCKD MCKD1 MUC-1 MUC-1/SEC MUC-1/X MUC1/ZD PEM PEMT PUM	protein-coding	1q22	mucin 1, cell surface associated ||| Mucin-1	.	15.4589	15.0342	14.5354	15.9011	13.9811	16.6477	14.2388	15.0791	14.0147	14.012	-0.2658	1.09989
sp|Q8N1I0|DOCK4_HUMAN	sp|Q8N1I0|DOCK4_HUMAN	sp|Q8N1I0|DOCK4_HUMAN	__Other	sp|Q8N1I0|DOCK4_HUMAN	2	2	2	1	2	2	2	1.5	1.5	1.5	225.2	1966	1966	0	5.7997				5102	0	0	0	DOCK4_HUMAN Q8N1I0	sp|Q8N1I0|DOCK4_HUMAN Dedicator of cytokinesis protein 4 OS=Homo sapiens OX=9606 GN=DOCK4 PE=1 SV=3	9732	1	0	DOCK4	---	protein-coding	7q31.1	dedicator of cytokinesis 4 ||| Dedicator of cytokinesis protein 4	.		10.7266	10.8383	8.61647	11.8127	10.2792	10.4344	10.4569	11.7742	10.5217	0.246527	-1.97526
sp|P15104|GLNA_HUMAN	sp|P15104|GLNA_HUMAN	sp|P15104|GLNA_HUMAN	__Other	sp|P15104|GLNA_HUMAN	11	11	11	1	11	11	11	44	44	44	42.064	373	373	0	47.457				1655	0	0	0	GLNA_HUMAN P15104	sp|P15104|GLNA_HUMAN Glutamine synthetase OS=Homo sapiens OX=9606 GN=GLUL PE=1 SV=4	2752	1	0	GLUL	GLNS GS PIG43 PIG59	protein-coding	1q25.3	glutamate-ammonia ligase ||| Glutamine synthetase	.	15.2106	15.7498	15.6225	15.3373	15.0319	17.6203	14.6355	14.6227	14.6135	15.6567	0.229962	-0.0552087
sp|Q15831|STK11_HUMAN	sp|Q15831|STK11_HUMAN	sp|Q15831|STK11_HUMAN	__Other	sp|Q15831|STK11_HUMAN	1	1	1	1	1	1	1	3.2	3.2	3.2	48.635	433	433	0	4.5776				3808	0	0	0	STK11_HUMAN Q15831	sp|Q15831|STK11_HUMAN Serine/threonine-protein kinase STK11 OS=Homo sapiens OX=9606 GN=STK11 PE=1 SV=1	6794	1	0	STK11	LKB1 PJS hLKB1	protein-coding	19p13.3	serine/threonine kinase 11 ||| Serine/threonine-protein kinase STK11	.	11.7301	8.80503	9.96757	9.5294	9.26611		7.27784	9.52127	7.50183	9.3118	1.05674	0.618573
sp|O95236|APOL3_HUMAN	sp|O95236|APOL3_HUMAN	sp|O95236|APOL3_HUMAN	__Other	sp|O95236|APOL3_HUMAN	1	1	1	1	1	1	1	2.7	2.7	2.7	44.278	402	402	0.0073168	1.1936				1104	0	0	0	APOL3_HUMAN O95236	sp|O95236|APOL3_HUMAN Apolipoprotein L3 OS=Homo sapiens OX=9606 GN=APOL3 PE=1 SV=3	80833	1	0	APOL3	APOLIII CG121 CG12_1 apoL-III	protein-coding	22q12.3	apolipoprotein L3	.	12.0508	11.6338	11.9648	11.8883	11.7027	9.90267	10.05	12.5139	11.9915	10.5678	0.642092	0.565628
sp|Q9Y6Q5|AP1M2_HUMAN	sp|Q9Y6Q5|AP1M2_HUMAN	sp|Q9Y6Q5|AP1M2_HUMAN	__Other	sp|Q9Y6Q5|AP1M2_HUMAN	11	8	8	1	11	8	8	28.1	21.5	21.5	48.108	423	423	0	14.96				8555	0	0	0	AP1M2_HUMAN Q9Y6Q5	sp|Q9Y6Q5|AP1M2_HUMAN AP-1 complex subunit mu-2 OS=Homo sapiens OX=9606 GN=AP1M2 PE=1 SV=4	10053	1	0	AP1M2	AP1-mu2 HSMU1B MU-1B MU1B mu2	protein-coding	19p13.2	adaptor related protein complex 1 subunit mu 2 ||| AP-1 complex subunit mu-2	.	16.0456	15.5473	14.5863	16.2881	14.4207	16.6397	14.4401	16.4989	14.6367	14.787	-0.700923	1.00093
sp|Q96HM7|PED1B_HUMAN;sp|Q9H1Q7|PED1A_HUMAN	sp|Q96HM7|PED1B_HUMAN;sp|Q9H1Q7|PED1A_HUMAN	sp|Q96HM7|PED1B_HUMAN;sp|Q9H1Q7|PED1A_HUMAN	__Other	sp|Q96HM7|PED1B_HUMAN	4;1	4;1	4;1	2	4	4	4	8.1	8.1	8.1	49.726	432	432;454	0	4.3501				6122	0	0	0	PED1A_HUMAN Q9H1Q7 PED1B_HUMAN Q96HM7	sp|Q96HM7|PED1B_HUMAN PC-esterase domain-containing protein 1B OS=Homo sapiens OX=9606 GN=PCED1B PE=1 SV=1	64773 91523	2	5	PCED1A PCED1B	C20orf81 FAM113A bA12M19.1 FAM113B	protein-coding	20p13!12q13.11	PC-esterase domain containing 1A ||| PC-esterase domain-containing protein 1A ||| PC-esterase domain containing 1B ||| PC-esterase domain-containing protein 1B	.	11.3794	13.1476	12.0271	12.5533	11.7457	13.2148	11.8161	14.7374	13.2339	13.073	-0.773034	-0.246855
sp|O14975|S27A2_HUMAN	sp|O14975|S27A2_HUMAN	sp|O14975|S27A2_HUMAN	__Other	sp|O14975|S27A2_HUMAN	24	24	24	1	24	24	24	49.5	49.5	49.5	70.311	620	620	0	254.79				464	0	0	0	S27A2_HUMAN O14975	sp|O14975|S27A2_HUMAN Very long-chain acyl-CoA synthetase OS=Homo sapiens OX=9606 GN=SLC27A2 PE=1 SV=2	11001	1	0	SLC27A2	ACSVL1 FACVL1 FATP2 HsT17226 VLACS VLCS hFACVL1	protein-coding	15q21.2	solute carrier family 27 member 2 ||| Very long-chain acyl-CoA synthetase	.	16.2383	16.7517	16.6093	16.3353	17.2871	18.4483	15.7109	16.0573	15.5347	15.6468	0.155648	-0.118401
sp|O43294|TGFI1_HUMAN	sp|O43294|TGFI1_HUMAN	sp|O43294|TGFI1_HUMAN	__Other	sp|O43294|TGFI1_HUMAN	5	5	5	1	5	5	5	14.3	14.3	14.3	49.814	461	461	0	45.645				599	0	0	0	TGFI1_HUMAN O43294	sp|O43294|TGFI1_HUMAN Transforming growth factor beta-1-induced transcript 1 protein OS=Homo sapiens OX=9606 GN=TGFB1I1 PE=1 SV=2	7041	1	0	TGFB1I1	ARA55 HIC-5 HIC5 TSC-5	protein-coding	16p11.2	transforming growth factor beta 1 induced transcript 1 ||| Transforming growth factor beta-1-induced transcript 1 protein	.	12.0305	13.941	15.3434	13.4807	13.1369	12.5411	12.7093	13.3462	12.9753	14.7401	1.80931	-0.0534164
sp|O75830|SPI2_HUMAN;sp|P50453|SPB9_HUMAN	sp|P50453|SPB9_HUMAN;sp|O75830|SPI2_HUMAN	sp|O75830|SPI2_HUMAN;sp|P50453|SPB9_HUMAN	__Other	sp|P50453|SPB9_HUMAN	19;1	18;0	17;0	2	19	18	17	53.2	50.5	47.3	42.403	376	376;405	0	75.794				2480	0	0	0	SPB9_HUMAN P50453 SPI2_HUMAN O75830	sp|P50453|SPB9_HUMAN Serpin B9 OS=Homo sapiens OX=9606 GN=SERPINB9 PE=1 SV=1	5272 5276	2	5	SERPINB9 SERPINI2	CAP-3 CAP3 PI-9 PI9 MEPI PANCPIN PI14 TSA2004	protein-coding	6p25.2!3q26.1	serpin family B member 9 ||| Serpin B9 ||| serpin family I member 2 ||| Serpin I2	.	15.9325	16.9049	16.9926	15.7096	17.5249	15.4924	15.8966	15.7208	18.1178	17.1517	0.41679	-0.866185
sp|Q9Y240|CLC11_HUMAN	sp|Q9Y240|CLC11_HUMAN	sp|Q9Y240|CLC11_HUMAN	__Other	sp|Q9Y240|CLC11_HUMAN	2	2	2	1	2	2	2	7.7	7.7	7.7	35.694	323	323	0.0074341	1.1835				8210	0	0	0	CLC11_HUMAN Q9Y240	sp|Q9Y240|CLC11_HUMAN C-type lectin domain family 11 member A OS=Homo sapiens OX=9606 GN=CLEC11A PE=1 SV=1	6320	1	0	CLEC11A	CLECSF3 LSLCL P47 SCGF	protein-coding	19q13.33	C-type lectin domain containing 11A ||| C-type lectin domain family 11 member A	.		11.0943	10.6277	10.3951	10.3545	10.7521	12.332	9.96535	9.48869	12.1257	-0.127433	-0.360043
sp|Q9UJC5|SH3L2_HUMAN	sp|Q9UJC5|SH3L2_HUMAN	sp|Q9UJC5|SH3L2_HUMAN	__Other	sp|Q9UJC5|SH3L2_HUMAN	1	1	1	1	1	1	1	13.1	13.1	13.1	12.326	107	107	0	4.4845				7982	0	0	0	SH3L2_HUMAN Q9UJC5	sp|Q9UJC5|SH3L2_HUMAN SH3 domain-binding glutamic acid-rich-like protein 2 OS=Homo sapiens OX=9606 GN=SH3BGRL2 PE=1 SV=2	83699	1	0	SH3BGRL2	---	protein-coding	6q14.1	SH3 domain binding glutamate rich protein like 2 ||| SH3 domain-binding glutamic acid-rich-like protein 2	.	13.0843	12.7022	11.7226	13.1159	12.5611	14.0438	11.8574	13.662	11.5074	11.6435	-0.791643	0.601695
sp|Q15147|PLCB4_HUMAN	sp|Q15147|PLCB4_HUMAN	sp|Q15147|PLCB4_HUMAN	__Other	sp|Q15147|PLCB4_HUMAN	14	14	14	1	14	14	14	13.3	13.3	13.3	134.46	1175	1175	0	69.565				3693	0	0	0	PLCB4_HUMAN Q15147	sp|Q15147|PLCB4_HUMAN 1-phosphatidylinositol 4,5-bisphosphate phosphodiesterase beta-4 OS=Homo sapiens OX=9606 GN=PLCB4 PE=1 SV=3	5332	1	0	PLCB4	ARCND2 PI-PLC	protein-coding	20p12.3-p12.2	phospholipase C beta 4 ||| 1-phosphatidylinositol 4,5-bisphosphate phosphodiesterase beta-4	.	12.9438	14.709	16.2585	13.4249	14.0542	14.1817	15.6556	14.2944	13.7352	13.8993	1.82049	-1.01305
sp|P05156|CFAI_HUMAN	sp|P05156|CFAI_HUMAN	sp|P05156|CFAI_HUMAN	__Other	sp|P05156|CFAI_HUMAN	2	2	2	1	2	2	2	5.3	5.3	5.3	65.75	583	583	0	4.667				1348	0	0	0	CFAI_HUMAN P05156	sp|P05156|CFAI_HUMAN Complement factor I OS=Homo sapiens OX=9606 GN=CFI PE=1 SV=2	3426	1	0	CFI	AHUS3 ARMD13 C3BINA C3b-INA FI IF KAF	protein-coding	4q25	complement factor I	.		11.1436	10.3647	10.6012	12.4142	9.85027	9.58351	12.0723	10.7433	10.7892	-0.43761	-0.201134
sp|Q86VU5|CMTD1_HUMAN	sp|Q86VU5|CMTD1_HUMAN	sp|Q86VU5|CMTD1_HUMAN	__Other	sp|Q86VU5|CMTD1_HUMAN	4	4	4	1	4	4	4	26	26	26	28.808	262	262	0	53.922				4842	0	0	0	CMTD1_HUMAN Q86VU5	sp|Q86VU5|CMTD1_HUMAN Catechol O-methyltransferase domain-containing protein 1 OS=Homo sapiens OX=9606 GN=COMTD1 PE=1 SV=1	118881	1	0	COMTD1	---	protein-coding	10q22.2	catechol-O-methyltransferase domain containing 1 ||| Catechol O-methyltransferase domain-containing protein 1	.	14.8812	14.1773	13.1495	15.4813	13.7448	15.4369	13.2817	13.7538	13.454	13.0151	-0.765173	1.56664
sp|P09211|GSTP1_HUMAN	sp|P09211|GSTP1_HUMAN	sp|P09211|GSTP1_HUMAN	__Other	sp|P09211|GSTP1_HUMAN	14	14	14	1	14	14	14	60.5	60.5	60.5	23.356	210	210	0	323.31				1464	0	0	0	GSTP1_HUMAN P09211	sp|P09211|GSTP1_HUMAN Glutathione S-transferase P OS=Homo sapiens OX=9606 GN=GSTP1 PE=1 SV=2	2950	1	0	GSTP1	DFN7 FAEES3 GST3 GSTP HEL-S-22 PI	protein-coding	11q13.2	glutathione S-transferase pi 1 ||| Glutathione S-transferase P	.	19.5126	19.806	19.251	19.2594	20.4083	20.3101	21.1694	19.3421	18.4083	18.3787	-0.314897	-0.306499
sp|A8MZ36|EVPLL_HUMAN;sp|Q92817|EVPL_HUMAN	sp|Q92817|EVPL_HUMAN;sp|A8MZ36|EVPLL_HUMAN	sp|A8MZ36|EVPLL_HUMAN;sp|Q92817|EVPL_HUMAN	__Other	sp|Q92817|EVPL_HUMAN	75;3	75;3	75;3	2	75	75	75	45.4	45.4	45.4	231.6	2033	2033;301	0	323.31				5755	0	0	0	EVPL_HUMAN Q92817 EVPLL_HUMAN A8MZ36	sp|Q92817|EVPL_HUMAN Envoplakin OS=Homo sapiens OX=9606 GN=EVPL PE=1 SV=3	2125 645027	2	4	EVPL EVPLL	EVPK	protein-coding	17q25.1!17p11.2	envoplakin ||| envoplakin like ||| Envoplakin-like protein	.	19.0885	18.246	18.1794	19.5451	17.3171	18.7249	17.2103	19.1701	17.1489	17.1518	0.12349	1.48912
sp|Q92754|AP2C_HUMAN	sp|Q92754|AP2C_HUMAN	sp|Q92754|AP2C_HUMAN	__Other	sp|Q92754|AP2C_HUMAN	5	5	3	1	5	5	3	12	12	8.2	49.176	450	450	0	8.9665				5738	0	0	0	AP2C_HUMAN Q92754	sp|Q92754|AP2C_HUMAN Transcription factor AP-2 gamma OS=Homo sapiens OX=9606 GN=TFAP2C PE=1 SV=1	7022	1	0	TFAP2C	AP2-GAMMA ERF1 TFAP2G hAP-2g	protein-coding	20q13.31	transcription factor AP-2 gamma	.	14.6415	14.8163	13.6557	14.3536	13.5461	15.9612	16.0948	14.5135	14.1398	13.8932	-0.864012	-0.16612
sp|P09758|TACD2_HUMAN	sp|P09758|TACD2_HUMAN	sp|P09758|TACD2_HUMAN	__Other	sp|P09758|TACD2_HUMAN	9	9	9	1	9	9	9	31.9	31.9	31.9	35.709	323	323	0	98.888				1486	0	0	0	TACD2_HUMAN P09758	sp|P09758|TACD2_HUMAN Tumor-associated calcium signal transducer 2 OS=Homo sapiens OX=9606 GN=TACSTD2 PE=1 SV=3	4070	1	0	TACSTD2	EGP-1 EGP1 GA733-1 GA7331 GP50 M1S1 TROP2	protein-coding	1p32.1	tumor associated calcium signal transducer 2 ||| Tumor-associated calcium signal transducer 2	.	17.399	16.4374	15.9439	17.8987	15.3699	17.109	15.2984	16.971	15.8481	15.3081	-0.274457	1.6803
sp|Q9NQA3|WASH6_HUMAN	sp|Q9NQA3|WASH6_HUMAN	sp|Q9NQA3|WASH6_HUMAN	__Other	sp|Q9NQA3|WASH6_HUMAN	9	1	1	1	9	1	1	21.5	3.8	3.8	47.989	447	447	0	4.4944				7342	0	0	0	WASH6_HUMAN Q9NQA3	sp|Q9NQA3|WASH6_HUMAN WAS protein family homolog 6 OS=Homo sapiens OX=9606 GN=WASH6P PE=1 SV=3	653440	1	0	WASH6P	CXYorf1 FAM39A WASH	pseudo	Xq28_and_Yq12	WASP family homolog 6, pseudogene ||| WAS protein family homolog 6	.		7.96826	6.48885		6.75208	9.12294	7.93037	9.04895	8.04331	8.65796	-1.5175	NA
sp|P08603|CFAH_HUMAN	sp|P08603|CFAH_HUMAN	sp|P08603|CFAH_HUMAN	__Other	sp|P08603|CFAH_HUMAN	2	2	2	1	2	2	2	2.3	2.3	2.3	139.09	1231	1231	0	5.3665				1446	0	0	0	CFAH_HUMAN P08603	sp|P08603|CFAH_HUMAN Complement factor H OS=Homo sapiens OX=9606 GN=CFH PE=1 SV=4	3075	1	0	CFH	AHUS1 AMBP1 ARMD4 ARMS1 CFHL3 FH FHL1 HF HF1 HF2 HUS	protein-coding	1q31.3	complement factor H	.	11.6868	11.8799	11.9917	11.7724	12.7646	10.781	10.0048	12.8917	12.1321	11.2264	0.296115	0.0767588
sp|P12532|KCRU_HUMAN;sp|P17540|KCRS_HUMAN	sp|P12532|KCRU_HUMAN;sp|P17540|KCRS_HUMAN	sp|P12532|KCRU_HUMAN;sp|P17540|KCRS_HUMAN	__Other	sp|P12532|KCRU_HUMAN	15;3	15;3	15;3	2	15	15	15	49.2	49.2	49.2	47.036	417	417;419	0	323.31				1587	0	0	0	KCRU_HUMAN P12532 KCRS_HUMAN P17540	sp|P12532|KCRU_HUMAN Creatine kinase U-type, mitochondrial OS=Homo sapiens OX=9606 GN=CKMT1A PE=1 SV=1	548596 1159 1160	3	5	CKMT1A CKMT1B CKMT2	CKMT1 U-MtCK mia-CK CKMT UMTCK SMTCK	protein-coding	15q15.3!5q14.1	creatine kinase, mitochondrial 1A ||| creatine kinase, mitochondrial 1B ||| Creatine kinase U-type, mitochondrial ||| creatine kinase, mitochondrial 2 ||| Creatine kinase S-type, mitochondrial	.	15.6549	16.243	15.3789	15.7538	16.2884	17.4447	17.3985	15.0812	15.1732	15.1765	-0.582996	-0.208087
sp|P52569|CTR2_HUMAN	sp|P52569|CTR2_HUMAN	sp|P52569|CTR2_HUMAN	__Other	sp|P52569|CTR2_HUMAN	5	4	4	1	5	4	4	10.5	8.5	8.5	71.672	658	658	0	24.259				2569	0	0	0	CTR2_HUMAN P52569	sp|P52569|CTR2_HUMAN Cationic amino acid transporter 2 OS=Homo sapiens OX=9606 GN=SLC7A2 PE=1 SV=2	6542	1	0	SLC7A2	ATRC2 CAT2 HCAT2	protein-coding	8p22	solute carrier family 7 member 2 ||| Cationic amino acid transporter 2	.	12.8523	13.5994	12.6987	12.93	13.2936	15.4944	12.736	12.4781	12.7289	13.6739	-0.555484	-0.324211
sp|Q17RY6|LY6K_HUMAN	sp|Q17RY6|LY6K_HUMAN	sp|Q17RY6|LY6K_HUMAN	__Other	sp|Q17RY6|LY6K_HUMAN	4	4	4	1	4	4	4	26.1	26.1	26.1	18.673	165	165	0	7.8878				3905	0	0	0	LY6K_HUMAN Q17RY6	sp|Q17RY6|LY6K_HUMAN Lymphocyte antigen 6K OS=Homo sapiens OX=9606 GN=LY6K PE=1 SV=2	54742	1	0	LY6K	CT97 HSJ001348 URLC10 ly-6K	protein-coding	8q24.3	lymphocyte antigen 6 family member K ||| Lymphocyte antigen 6K	.	12.9384	13.313	12.126	13.7849	12.5115	12.0366	12.1728	14.3334	14.2751	13.4093	-0.955217	0.703735
sp|Q8NE22|SETD9_HUMAN	sp|Q8NE22|SETD9_HUMAN	sp|Q8NE22|SETD9_HUMAN	__Other	sp|Q8NE22|SETD9_HUMAN	2	2	2	1	2	2	2	11	11	11	34.095	299	299	0.00038231	2.7271				5338	0	0	0	SETD9_HUMAN Q8NE22	sp|Q8NE22|SETD9_HUMAN SET domain-containing protein 9 OS=Homo sapiens OX=9606 GN=SETD9 PE=2 SV=2	133383	1	0	SETD9	C5orf35	protein-coding	5q11.2	SET domain containing 9 ||| SET domain-containing protein 9	.		9.53417	8.87256	8.31249	7.64526	8.91204	8.69283	8.7041	6.20843	9.26415	0.546078	-0.013995
sp|Q9ULC5|ACSL5_HUMAN	sp|Q9ULC5|ACSL5_HUMAN	sp|Q9ULC5|ACSL5_HUMAN	__Other	sp|Q9ULC5|ACSL5_HUMAN	16	15	15	1	16	15	15	29.3	28.1	28.1	75.99	683	683	0	77.656				8068	0	0	0	ACSL5_HUMAN Q9ULC5	sp|Q9ULC5|ACSL5_HUMAN Long-chain-fatty-acid--CoA ligase 5 OS=Homo sapiens OX=9606 GN=ACSL5 PE=1 SV=1	51703	1	0	ACSL5	ACS2 ACS5 FACL5	protein-coding	10q25.2	acyl-CoA synthetase long chain family member 5 ||| Long-chain-fatty-acid--CoA ligase 5	.	15.6013	15.7899	16.2052	15.9331	17.2866	14.5718	14.4627	14.8919	15.9699	14.9103	0.676257	0.404148
sp|Q5H9L2|TCAL5_HUMAN;sp|Q6IPX3|TCAL6_HUMAN;sp|Q969E4|TCAL3_HUMAN	sp|Q969E4|TCAL3_HUMAN;sp|Q6IPX3|TCAL6_HUMAN;sp|Q5H9L2|TCAL5_HUMAN	sp|Q5H9L2|TCAL5_HUMAN;sp|Q6IPX3|TCAL6_HUMAN;sp|Q969E4|TCAL3_HUMAN	__Other	sp|Q5H9L2|TCAL5_HUMAN;sp|Q6IPX3|TCAL6_HUMAN;sp|Q969E4|TCAL3_HUMAN	9;7;7	9;7;7	9;7;7	3	9	9	9	47	47	47	22.502	200	200;200;206	0	110.59				5817	0	0	0	TCAL3_HUMAN Q969E4 TCAL5_HUMAN Q5H9L2 TCAL6_HUMAN Q6IPX3	sp|Q969E4|TCAL3_HUMAN Transcription elongation factor A protein-like 3 OS=Homo sapiens OX=9606 GN=TCEAL3 PE=1 SV=1;sp|Q6IPX3|TCAL6_HUMAN Transcription elongation factor A protein-like 6 OS=Homo sapiens OX=9606 GN=TCEAL6 PE=2 SV=1;sp|Q5H9L2|TCAL5_HUMAN Tran	85012 340543 158931	3	2	TCEAL3 TCEAL5 TCEAL6	WEX8 WEX4 Tceal3 WEX2	protein-coding	Xq22.2!Xq22.1	transcription elongation factor A like 3 ||| Transcription elongation factor A protein-like 3 ||| transcription elongation factor A like 5 ||| Transcription elongation factor A protein-like 5 ||| transcription elongation factor A like 6 ||| Transcription elongation factor A protein-like 6	.	14.1248	14.8606	16.0138	15.4355	13.6585	13.6771	13.3471	14.4627	14.8377	15.4133	1.40807	0.829775
sp|O60437|PEPL_HUMAN;REV__sp|Q9ULW3|ABT1_HUMAN	sp|O60437|PEPL_HUMAN;REV__sp|Q9ULW3|ABT1_HUMAN	sp|O60437|PEPL_HUMAN;REV__sp|Q9ULW3|ABT1_HUMAN	__REV	sp|O60437|PEPL_HUMAN	103;1	103;1	102;1	2	103	103	102	62.4	62.4	62	204.74	1756	1756;272	0	323.31				738	0	0	0	ABT1_HUMAN Q9ULW3 PEPL_HUMAN O60437	sp|O60437|PEPL_HUMAN Periplakin OS=Homo sapiens OX=9606 GN=PPL PE=1 SV=4	29777 5493	2	5	ABT1 PPL	Esf2 hABT1	protein-coding	6p22.2!16p13.3	activator of basal transcription 1 ||| periplakin	.	19.9252	19.1527	19.8212	20.1541	18.1142	19.7638	18.1375	19.8648	18.0687	18.0027	0.830356	1.16318
sp|Q9Y446|PKP3_HUMAN	sp|Q9Y446|PKP3_HUMAN	sp|Q9Y446|PKP3_HUMAN	__Other	sp|Q9Y446|PKP3_HUMAN	40	40	40	1	40	40	40	56.2	56.2	56.2	87.081	797	797	0	191.67				8373	0	0	0	PKP3_HUMAN Q9Y446	sp|Q9Y446|PKP3_HUMAN Plakophilin-3 OS=Homo sapiens OX=9606 GN=PKP3 PE=1 SV=1	11187	1	0	PKP3	---	protein-coding	11p15.5	plakophilin 3 ||| Plakophilin-3	.	18.5649	17.9654	17.1565	18.9486	17.1106	19.3105	17.0838	18.4006	17.077	16.873	-0.588554	1.20349
sp|P47712|PA24A_HUMAN	sp|P47712|PA24A_HUMAN	sp|P47712|PA24A_HUMAN	__Other	sp|P47712|PA24A_HUMAN	19	19	19	1	19	19	19	34	34	34	85.238	749	749	0	73.415				2351	0	0	0	PA24A_HUMAN P47712	sp|P47712|PA24A_HUMAN Cytosolic phospholipase A2 OS=Homo sapiens OX=9606 GN=PLA2G4A PE=1 SV=2	5321	1	0	PLA2G4A	GURDP PLA2G4 cPLA2 cPLA2-alpha	protein-coding	1q31.1	phospholipase A2 group IVA ||| Cytosolic phospholipase A2	.	16.223	16.9434	15.9761	16.1333	17.3467	18.7451	15.9793	16.0238	16.7905	16.1674	-0.669137	-0.511997
sp|Q01995|TAGL_HUMAN	sp|Q01995|TAGL_HUMAN	sp|Q01995|TAGL_HUMAN	__Other	sp|Q01995|TAGL_HUMAN	15	15	15	1	15	15	15	68.2	68.2	68.2	22.611	201	201	0	74.491				3081	0	0	0	TAGL_HUMAN Q01995	sp|Q01995|TAGL_HUMAN Transgelin OS=Homo sapiens OX=9606 GN=TAGLN PE=1 SV=4	6876	1	0	TAGLN	SM22 SM22-alpha SMCC TAGLN1 WS3-10	protein-coding	11q23.3	transgelin	.	15.4953	16.6594	18.0611	15.4626	15.3261	16.8879	17.1212	15.6912	15.6602	16.7135	1.69561	-0.902864
sp|P27338|AOFB_HUMAN	sp|P27338|AOFB_HUMAN	sp|P27338|AOFB_HUMAN	__Other	sp|P27338|AOFB_HUMAN	3	1	1	1	3	1	1	3.8	1.5	1.5	58.762	520	520	0.0066114	1.2423				1947	0	0	0	AOFB_HUMAN P27338	sp|P27338|AOFB_HUMAN Amine oxidase [flavin-containing] B OS=Homo sapiens OX=9606 GN=MAOB PE=1 SV=3	4129	1	0	MAOB	---	protein-coding	Xp11.3	monoamine oxidase B ||| Amine oxidase [flavin-containing] B	.	14.0568	14.0103	14.9883	13.1105	15.0183	13.3548	12.5769	14.5113	13.3604	12.8118	1.27174	-0.606032
sp|Q7Z3B1|NEGR1_HUMAN	sp|Q7Z3B1|NEGR1_HUMAN	sp|Q7Z3B1|NEGR1_HUMAN	__Other	sp|Q7Z3B1|NEGR1_HUMAN	4	4	4	1	4	4	4	15	15	15	38.719	354	354	0	30.762				4693	0	0	0	NEGR1_HUMAN Q7Z3B1	sp|Q7Z3B1|NEGR1_HUMAN Neuronal growth regulator 1 OS=Homo sapiens OX=9606 GN=NEGR1 PE=1 SV=3	257194	1	0	NEGR1	DMML2433 IGLON4 KILON Ntra	protein-coding	1p31.1	neuronal growth regulator 1	.	13.6908	14.3337	15.431	13.4365	13.9157	12.8963	12.888	13.4641	14.588	15.109	1.46492	-0.529578
sp|Q9Y696|CLIC4_HUMAN	sp|Q9Y696|CLIC4_HUMAN	sp|Q9Y696|CLIC4_HUMAN	__Other	sp|Q9Y696|CLIC4_HUMAN	17	17	17	1	17	17	17	62.8	62.8	62.8	28.772	253	253	0	323.31				8516	0	0	0	CLIC4_HUMAN Q9Y696	sp|Q9Y696|CLIC4_HUMAN Chloride intracellular channel protein 4 OS=Homo sapiens OX=9606 GN=CLIC4 PE=1 SV=4	25932	1	0	CLIC4	CLIC4L H1 MTCLIC huH1 p64H1	protein-coding	1p36.11	chloride intracellular channel 4 ||| Chloride intracellular channel protein 4	.	17.1709	17.9304	19.2311	17.8742	16.6635	16.7371	16.5866	17.3203	17.6185	18.6924	1.64068	0.283724
sp|P61916|NPC2_HUMAN	sp|P61916|NPC2_HUMAN	sp|P61916|NPC2_HUMAN	__Other	sp|P61916|NPC2_HUMAN	8	8	8	1	8	8	8	51.7	51.7	51.7	16.57	151	151	0	50.077				2812	0	0	0	NPC2_HUMAN P61916	sp|P61916|NPC2_HUMAN NPC intracellular cholesterol transporter 2 OS=Homo sapiens OX=9606 GN=NPC2 PE=1 SV=1	10577	1	0	NPC2	EDDM1 HE1	protein-coding	14q24.3	NPC intracellular cholesterol transporter 2	.	15.5955	17.0994	16.9531	16.6675	17.294	15.8812	15.4328	18.4998	16.5541	17.6598	0.0852867	-0.200316
sp|Q14CN4|K2C72_HUMAN;CON__P08729;CON__Q14CN4-1;CON__Q9DCV7	CON__P08729;CON__Q9DCV7;sp|Q14CN4|K2C72_HUMAN;CON__Q14CN4-1	sp|Q14CN4|K2C72_HUMAN;CON__P08729;CON__Q14CN4-1;CON__Q9DCV7	__Other	CON__P08729	51;11;3;3	3;0;0;0	3;0;0;0	4	51	3	3	70.6	2.1	2.1	51.417	469	469;457;511;511	0	6.6546			+	28	2	0	0	P08729 Q14CN4-1 K2C72_HUMAN Q14CN4		3855 140807	2	2	KRT7 KRT72	CK7 K2C7 K7 SCL K6IRS2 K6irs KRT6 KRT6IRS2	protein-coding	12q13.13	keratin 7 ||| Keratin, type II cytoskeletal 7 ||| keratin 72 ||| keratin 72 ||| Keratin, type II cytoskeletal 72	.	14.7103	13.8708	15.2122	14.6522	13.2536	14.2172	12.1974	14.3361	13.277	13.2347	1.41464	0.854622
sp|P11137|MTAP2_HUMAN	sp|P11137|MTAP2_HUMAN	sp|P11137|MTAP2_HUMAN	__Other	sp|P11137|MTAP2_HUMAN	15	15	15	1	15	15	15	10.8	10.8	10.8	199.52	1827	1827	0	38.77				1546	0	0	0	MTAP2_HUMAN P11137	sp|P11137|MTAP2_HUMAN Microtubule-associated protein 2 OS=Homo sapiens OX=9606 GN=MAP2 PE=1 SV=4	4133	1	0	MAP2	MAP-2 MAP2A MAP2B MAP2C	protein-coding	2q34	microtubule associated protein 2 ||| Microtubule-associated protein 2	.	15.9744	15.9822	15.6878	16.0434	16.0813	17.8412	15.2107	15.1081	14.8406	15.0152	-0.0407495	0.314836
sp|P16870|CBPE_HUMAN	sp|P16870|CBPE_HUMAN	sp|P16870|CBPE_HUMAN	__Other	sp|P16870|CBPE_HUMAN	2	2	2	1	2	2	2	4.2	4.2	4.2	53.15	476	476	0.00075292	2.2948				1707	0	0	0	CBPE_HUMAN P16870	sp|P16870|CBPE_HUMAN Carboxypeptidase E OS=Homo sapiens OX=9606 GN=CPE PE=1 SV=1	1363	1	0	CPE	CPH	protein-coding	4q32.3	carboxypeptidase E	.	11.3906	12.0743	11.2744	11.8411	11.9005	13.8306	11.268	12.5412	11.1198	10.8395	-0.552456	0.014203
sp|Q8IZV5|RDH10_HUMAN	sp|Q8IZV5|RDH10_HUMAN	sp|Q8IZV5|RDH10_HUMAN	__Other	sp|Q8IZV5|RDH10_HUMAN	12	12	12	1	12	12	12	53.1	53.1	53.1	38.087	341	341	0	196.57				5071	0	0	0	RDH10_HUMAN Q8IZV5	sp|Q8IZV5|RDH10_HUMAN Retinol dehydrogenase 10 OS=Homo sapiens OX=9606 GN=RDH10 PE=1 SV=1	157506	1	0	RDH10	SDR16C4	protein-coding	8q21.11	retinol dehydrogenase 10	.	14.1567	15.3391	14.416	14.5807	16.4656	16.352	14.3698	13.9938	15.7726	14.6044	-0.6534	-0.488689
sp|Q6PIU2|NCEH1_HUMAN	sp|Q6PIU2|NCEH1_HUMAN	sp|Q6PIU2|NCEH1_HUMAN	__Other	sp|Q6PIU2|NCEH1_HUMAN	12	12	12	1	12	12	12	33.6	33.6	33.6	45.807	408	408	0	251.37				4467	0	0	0	NCEH1_HUMAN Q6PIU2	sp|Q6PIU2|NCEH1_HUMAN Neutral cholesterol ester hydrolase 1 OS=Homo sapiens OX=9606 GN=NCEH1 PE=1 SV=3	57552	1	0	NCEH1	AADACL1 NCEH	protein-coding	3q26.31	neutral cholesterol ester hydrolase 1	.	18.1771	17.1999	17.6845	18.789	16.9754	16.3646	15.5409	16.4676	16.77	17.2711	0.701605	1.80613
sp|P43490|NAMPT_HUMAN	sp|P43490|NAMPT_HUMAN	sp|P43490|NAMPT_HUMAN	__Other	sp|P43490|NAMPT_HUMAN	32	32	32	1	32	32	32	67	67	67	55.52	491	491	0	323.31				2308	0	0	0	NAMPT_HUMAN P43490	sp|P43490|NAMPT_HUMAN Nicotinamide phosphoribosyltransferase OS=Homo sapiens OX=9606 GN=NAMPT PE=1 SV=1	10135	1	0	NAMPT	1110035O14Rik PBEF PBEF1 VF VISFATIN	protein-coding	7q22.3	nicotinamide phosphoribosyltransferase	.	19.3909	19.5286	19.0556	19.4819	19.1096	21.0564	18.1773	18.7167	20.2737	18.3898	-0.227003	0.199284
sp|Q96FQ6|S10AG_HUMAN	sp|Q96FQ6|S10AG_HUMAN	sp|Q96FQ6|S10AG_HUMAN	__Other	sp|Q96FQ6|S10AG_HUMAN	8	8	8	1	8	8	8	68	68	68	11.801	103	103	0	50.618				6056	0	0	0	S10AG_HUMAN Q96FQ6	sp|Q96FQ6|S10AG_HUMAN Protein S100-A16 OS=Homo sapiens OX=9606 GN=S100A16 PE=1 SV=1	140576	1	0	S100A16	AAG13 DT1P1A7 S100F	protein-coding	1q21.3	S100 calcium binding protein A16 ||| Protein S100-A16	.	14.8555	15.5596	15.0545	15.7083	14.692	17.3184	14.082	15.5124	14.866	14.8508	-0.206091	0.447724
sp|Q5VYY1|ANR22_HUMAN	sp|Q5VYY1|ANR22_HUMAN	sp|Q5VYY1|ANR22_HUMAN	__Other	sp|Q5VYY1|ANR22_HUMAN	2	2	2	1	2	2	2	11	11	11	21.848	191	191	0.00012776	2.7802				4255	0	0	0	ANR22_HUMAN Q5VYY1	sp|Q5VYY1|ANR22_HUMAN Ankyrin repeat domain-containing protein 22 OS=Homo sapiens OX=9606 GN=ANKRD22 PE=2 SV=1	118932	1	0	ANKRD22	---	protein-coding	10q23.31	ankyrin repeat domain 22 ||| Ankyrin repeat domain-containing protein 22	.	11.2592	12.3635	11.3401	12.0494	11.7243	13.3669	11.6476	13.5617	11.2227	11.0061	-0.649736	0.0595547
sp|Q8N565|MREG_HUMAN	sp|Q8N565|MREG_HUMAN	sp|Q8N565|MREG_HUMAN	__Other	sp|Q8N565|MREG_HUMAN	1	1	1	1	1	1	1	5.6	5.6	5.6	24.927	214	214	0.0037842	1.5883				5165	0	0	0	MREG_HUMAN Q8N565	sp|Q8N565|MREG_HUMAN Melanoregulin OS=Homo sapiens OX=9606 GN=MREG PE=1 SV=1	55686	1	0	MREG	DSU WDT2	protein-coding	2q35	melanoregulin	.		9.64893	8.57809	10.5849	8.9919	11.1642	10.8868	10.5149	9.53809	9.25361	-1.36097	0.645867
sp|Q8IVT2|MISP_HUMAN	sp|Q8IVT2|MISP_HUMAN	sp|Q8IVT2|MISP_HUMAN	__Other	sp|Q8IVT2|MISP_HUMAN	19	19	19	1	19	19	19	36.4	36.4	36.4	75.356	679	679	0	130.97				4951	0	0	0	MISP_HUMAN Q8IVT2	sp|Q8IVT2|MISP_HUMAN Mitotic interactor and substrate of PLK1 OS=Homo sapiens OX=9606 GN=MISP PE=1 SV=1	126353	1	0	MISP	C19orf21 MISP1	protein-coding	19p13.3	mitotic spindle positioning ||| Mitotic interactor and substrate of PLK1	.	14.8834	16.0131	15.5121	15.3294	15.1704	17.2481	15.0034	17.3835	15.5142	15.0875	-0.268932	-0.451688
sp|P21741|MK_HUMAN	sp|P21741|MK_HUMAN	sp|P21741|MK_HUMAN	__Other	sp|P21741|MK_HUMAN	5	5	5	1	5	5	5	35.7	35.7	35.7	15.585	143	143	0	17.555				1833	0	0	0	MK_HUMAN P21741	sp|P21741|MK_HUMAN Midkine OS=Homo sapiens OX=9606 GN=MDK PE=1 SV=1	4192	1	0	MDK	ARAP MK NEGF2	protein-coding	11p11.2	midkine	.	15.6337	14.8469	14.1417	16.1592	15.2202	14.2421	13.6127	15.5189	13.6189	13.8359	-0.40202	1.61551
sp|P02452|CO1A1_HUMAN;sp|P02458|CO2A1_HUMAN;CON__Q862S4	sp|P02452|CO1A1_HUMAN;CON__Q862S4;sp|P02458|CO2A1_HUMAN	sp|P02452|CO1A1_HUMAN;sp|P02458|CO2A1_HUMAN;CON__Q862S4	__Other	sp|P02452|CO1A1_HUMAN	29;3;3	29;3;3	29;3;3	3	29	29	29	26.7	26.7	26.7	138.94	1464	1464;114;1487	0	167.91				1278	2	0	0	CO1A1_HUMAN P02452 CO2A1_HUMAN P02458	sp|P02452|CO1A1_HUMAN Collagen alpha-1(I) chain OS=Homo sapiens OX=9606 GN=COL1A1 PE=1 SV=5	1277 1280	2	5	COL1A1 COL2A1	EDSARTH1 EDSC OI1 OI2 OI3 OI4 ANFH AOM COL11A3 SEDC STL1	protein-coding	17q21.33!12q13.11	collagen type I alpha 1 chain ||| Collagen alpha-1(I) chain ||| collagen type II alpha 1 chain ||| Collagen alpha-1(II) chain	.	17.0807	17.6874	19.3971	16.8004	18.2848	16.6965	16.7397	17.1325	16.8016	17.4105	1.9892	-0.607522
sp|P08133|ANXA6_HUMAN	sp|P08133|ANXA6_HUMAN	sp|P08133|ANXA6_HUMAN	__Other	sp|P08133|ANXA6_HUMAN	55	55	55	1	55	55	55	77.3	77.3	77.3	75.872	673	673	0	323.31				1427	0	0	0	ANXA6_HUMAN P08133	sp|P08133|ANXA6_HUMAN Annexin A6 OS=Homo sapiens OX=9606 GN=ANXA6 PE=1 SV=3	309	1	0	ANXA6	ANX6 CBP68 CPB-II p68 p70	protein-coding	5q33.1	annexin A6	.	16.9132	19.1711	19.8882	17.7061	19.1571	17.7894	19.4926	17.8272	18.9135	20.0352	1.03707	-1.14508
sp|O14967|CLGN_HUMAN	sp|O14967|CLGN_HUMAN	sp|O14967|CLGN_HUMAN	__Other	sp|O14967|CLGN_HUMAN	12	11	11	1	12	11	11	31.5	29.5	29.5	70.038	610	610	0	40.519				461	0	0	0	CLGN_HUMAN O14967	sp|O14967|CLGN_HUMAN Calmegin OS=Homo sapiens OX=9606 GN=CLGN PE=1 SV=1	1047	1	0	CLGN	---	protein-coding	4q31.1	calmegin	.	12.9147	15.3887	15.9197	14.34	16.4369	13.966	14.2066	14.7425	15.6466	16.0728	0.753248	-0.826361
sp|P00966|ASSY_HUMAN	sp|P00966|ASSY_HUMAN	sp|P00966|ASSY_HUMAN	__Other	sp|P00966|ASSY_HUMAN	20	20	20	1	20	20	20	47.8	47.8	47.8	46.53	412	412	0	50.987				1261	0	0	0	ASSY_HUMAN P00966	sp|P00966|ASSY_HUMAN Argininosuccinate synthase OS=Homo sapiens OX=9606 GN=ASS1 PE=1 SV=2	445	1	0	ASS1	ASS CTLN1	protein-coding	9q34.11	argininosuccinate synthase 1 ||| Argininosuccinate synthase	.	16.3242	16.866	15.884	16.2704	15.6502	18.6386	16.2713	16.3579	17.1065	15.9605	-0.633435	-0.247051
sp|Q5VUB5|F1711_HUMAN	sp|Q5VUB5|F1711_HUMAN	sp|Q5VUB5|F1711_HUMAN	__Other	sp|Q5VUB5|F1711_HUMAN	3	3	3	1	3	3	3	6	6	6	97.853	890	890	0	6.4797				4237	0	0	0	F1711_HUMAN Q5VUB5	sp|Q5VUB5|F1711_HUMAN Protein FAM171A1 OS=Homo sapiens OX=9606 GN=FAM171A1 PE=1 SV=1	221061	1	0	FAM171A1	APCN C10orf38	protein-coding	10p13	family with sequence similarity 171 member A1 ||| Protein FAM171A1	.		11.5306	12.1725	10.0594	12.5638	10.5549	11.9448	10.5208	10.6003	11.9907	0.871555	-1.24148
sp|Q08174|PCDH1_HUMAN	sp|Q08174|PCDH1_HUMAN	sp|Q08174|PCDH1_HUMAN	__Other	sp|Q08174|PCDH1_HUMAN	8	8	8	1	8	8	8	9.3	9.3	9.3	114.74	1060	1060	0	26.707				3196	0	0	0	PCDH1_HUMAN Q08174	sp|Q08174|PCDH1_HUMAN Protocadherin-1 OS=Homo sapiens OX=9606 GN=PCDH1 PE=1 SV=2	5097	1	0	PCDH1	PC42 PCDH42	protein-coding	5q31.3	protocadherin 1 ||| Protocadherin-1	.	15.7377	14.8539	14.0544	15.7855	14.3072	14.9419	13.8809	16.3785	13.7471	14.2025	-0.607827	1.12322
sp|Q92823|NRCAM_HUMAN	sp|Q92823|NRCAM_HUMAN	sp|Q92823|NRCAM_HUMAN	__Other	sp|Q92823|NRCAM_HUMAN	11	11	11	1	11	11	11	10.5	10.5	10.5	143.89	1304	1304	0	13.561				5757	0	0	0	NRCAM_HUMAN Q92823	sp|Q92823|NRCAM_HUMAN Neuronal cell adhesion molecule OS=Homo sapiens OX=9606 GN=NRCAM PE=1 SV=3	4897	1	0	NRCAM	---	protein-coding	7q31.1	neuronal cell adhesion molecule	.	14.0207	14.4975	13.9576	13.7477	16.3049	14.0674	13.5435	13.5343	15.0908	13.8941	-0.309985	-0.519807
sp|Q92556|ELMO1_HUMAN	sp|Q92556|ELMO1_HUMAN	sp|Q92556|ELMO1_HUMAN	__Other	sp|Q92556|ELMO1_HUMAN	5	3	3	1	5	3	3	7.3	5	5	83.829	727	727	0	7.0898				5688	0	0	0	ELMO1_HUMAN Q92556	sp|Q92556|ELMO1_HUMAN Engulfment and cell motility protein 1 OS=Homo sapiens OX=9606 GN=ELMO1 PE=1 SV=2	9844	1	0	ELMO1	CED-12 CED12 ELMO-1	protein-coding	7p14.2-p14.1	engulfment and cell motility 1 ||| Engulfment and cell motility protein 1	.	13.1666	13.1871	12.6988	12.0445	14.3749	12.0279	12.8214	12.4674	14.3873	12.3328	-0.195528	-0.849878
sp|P50281|MMP14_HUMAN	sp|P50281|MMP14_HUMAN	sp|P50281|MMP14_HUMAN	__Other	sp|P50281|MMP14_HUMAN	18	18	17	1	18	18	17	34.2	34.2	33.3	65.893	582	582	0	116.43				2472	0	0	0	MMP14_HUMAN P50281	sp|P50281|MMP14_HUMAN Matrix metalloproteinase-14 OS=Homo sapiens OX=9606 GN=MMP14 PE=1 SV=3	4323	1	0	MMP14	MMP-14 MMP-X1 MT-MMP MT-MMP-1 MT1-MMP MT1MMP MTMMP1 WNCHRS	protein-coding	14q11.2	matrix metallopeptidase 14 ||| Matrix metalloproteinase-14	.	18.1763	17.0338	17.1989	18.5564	17.3352	15.7778	15.6625	16.1174	16.8544	17.1187	0.371231	1.72877
sp|Q86XX4|FRAS1_HUMAN	sp|Q86XX4|FRAS1_HUMAN	sp|Q86XX4|FRAS1_HUMAN	__Other	sp|Q86XX4|FRAS1_HUMAN	15	15	15	1	15	15	15	5.4	5.4	5.4	443.21	4008	4008	0	56.625				4887	0	0	0	FRAS1_HUMAN Q86XX4	sp|Q86XX4|FRAS1_HUMAN Extracellular matrix protein FRAS1 OS=Homo sapiens OX=9606 GN=FRAS1 PE=1 SV=2	80144	1	0	FRAS1	FRASRS1	protein-coding	4q21.21	Fraser extracellular matrix complex subunit 1 ||| Extracellular matrix protein FRAS1	.	14.9272	14.7	15.692	15.1363	15.9363	13.7177	13.5822	14.5771	13.6339	13.9396	1.1651	0.609425
sp|P02533|K1C14_HUMAN;CON__P02533	sp|P02533|K1C14_HUMAN;CON__P02533	sp|P02533|K1C14_HUMAN;CON__P02533	__Other	sp|P02533|K1C14_HUMAN;CON__P02533	30;30	11;11	2;2	2	30	11	2	49.8	26.7	5.7	51.561	472	472;472	0	65.428			+	16	2	0	0	K1C14_HUMAN P02533	sp|P02533|K1C14_HUMAN Keratin, type I cytoskeletal 14 OS=Homo sapiens OX=9606 GN=KRT14 PE=1 SV=4;	3861	1	0	KRT14	CK14 EBS3 EBS4 K14 NFJ	protein-coding	17q21.2	keratin 14 ||| Keratin, type I cytoskeletal 14	.	15.3197	15.8112	17.5759	15.6512	15.0955	17.2709	15.8359	15.5915	15.2969	15.1576	1.64147	-0.283241
sp|Q14315|FLNC_HUMAN	sp|Q14315|FLNC_HUMAN	sp|Q14315|FLNC_HUMAN	__Other	sp|Q14315|FLNC_HUMAN	154	136	136	1	154	136	136	65.2	61	61	291.02	2725	2725	0	323.31				3545	0	0	0	FLNC_HUMAN Q14315	sp|Q14315|FLNC_HUMAN Filamin-C OS=Homo sapiens OX=9606 GN=FLNC PE=1 SV=3	2318	1	0	FLNC	ABP-280 ABP280A ABPA ABPL CMH26 FLN2 MFM5 MPD4 RCM5	protein-coding	7q32.1	filamin C ||| Filamin-C	.	20.1938	20.8	21.8108	20.7044	20.6287	19.4001	19.3631	19.7509	21.0204	21.6286	1.2724	0.166011
sp|Q9BUF5|TBB6_HUMAN	sp|Q9BUF5|TBB6_HUMAN	sp|Q9BUF5|TBB6_HUMAN	__Other	sp|Q9BUF5|TBB6_HUMAN	24	11	11	1	24	11	11	70.9	44.2	44.2	49.857	446	446	0	323.31				6635	0	0	0	TBB6_HUMAN Q9BUF5	sp|Q9BUF5|TBB6_HUMAN Tubulin beta-6 chain OS=Homo sapiens OX=9606 GN=TUBB6 PE=1 SV=1	84617	1	0	TUBB6	FPVEPD HsT1601 TUBB-5	protein-coding	18p11.21	tubulin beta 6 class V ||| Tubulin beta-6 chain	.	15.3618	17.6895	18.6064	16.7638	17.0322	15.9961	17.8565	16.6205	17.3034	18.6581	1.25178	-0.59081
sp|P08473|NEP_HUMAN	sp|P08473|NEP_HUMAN	sp|P08473|NEP_HUMAN	__Other	sp|P08473|NEP_HUMAN	20	20	20	1	20	20	20	27.1	27.1	27.1	85.513	750	750	0	49.721				1438	0	0	0	NEP_HUMAN P08473	sp|P08473|NEP_HUMAN Neprilysin OS=Homo sapiens OX=9606 GN=MME PE=1 SV=2	4311	1	0	MME	CALLA CD10 CMT2T NEP SCA43 SFE	protein-coding	3q25.2	membrane metalloendopeptidase ||| Neprilysin	.	15.6123	16.4109	17.2232	15.2475	15.1531	15.608	17.2595	17.3803	15.5569	16.0502	1.03837	-0.937329
sp|P32970|CD70_HUMAN	sp|P32970|CD70_HUMAN	sp|P32970|CD70_HUMAN	__Other	sp|P32970|CD70_HUMAN	4	4	4	1	4	4	4	25.4	25.4	25.4	21.118	193	193	0	13.858				2101	0	0	0	CD70_HUMAN P32970	sp|P32970|CD70_HUMAN CD70 antigen OS=Homo sapiens OX=9606 GN=CD70 PE=1 SV=2	970	1	0	CD70	CD27-L CD27L CD27LG LPFS3 TNFSF7 TNLG8A	protein-coding	19p13.3	CD70 molecule ||| CD70 antigen	.	12.7619	13.8733	13.5011	12.5745	13.0086	12.8794	13.917	12.9109	15.567	13.1981	0.0565534	-0.870084
sp|Q02297|NRG1_HUMAN	sp|Q02297|NRG1_HUMAN	sp|Q02297|NRG1_HUMAN	__Other	sp|Q02297|NRG1_HUMAN	3	3	3	1	3	3	3	4.2	4.2	4.2	70.391	640	640	0	10.012				3090	0	0	0	NRG1_HUMAN Q02297	sp|Q02297|NRG1_HUMAN Pro-neuregulin-1, membrane-bound isoform OS=Homo sapiens OX=9606 GN=NRG1 PE=1 SV=3	3084	1	0	NRG1	ARIA GGF GGF2 HGL HRG HRG1 HRGA MST131 MSTP131 NDF NRG1-IT2 SMDF	protein-coding	8p12	neuregulin 1 ||| Pro-neuregulin-1, membrane-bound isoform	.	12.9745	13.6337	13.8423	13.3668	14.0172	11.5354	13.7968	12.6716	14.6564	13.4835	0.421104	-0.0544221
sp|Q9ULV0|MYO5B_HUMAN	sp|Q9ULV0|MYO5B_HUMAN	sp|Q9ULV0|MYO5B_HUMAN	__Other	sp|Q9ULV0|MYO5B_HUMAN	9	5	5	1	9	5	5	4.5	3.2	3.2	213.67	1848	1848	0	21.45				8097	0	0	0	MYO5B_HUMAN Q9ULV0	sp|Q9ULV0|MYO5B_HUMAN Unconventional myosin-Vb OS=Homo sapiens OX=9606 GN=MYO5B PE=1 SV=3	4645	1	0	MYO5B	---	protein-coding	18q21.1	myosin VB ||| Unconventional myosin-Vb	.	13.716	12.885	12.0989	13.8658	12.2615	13.9421	11.9663	13.7503	11.9431	11.8916	-0.616101	1.15084
sp|O60711|LPXN_HUMAN	sp|O60711|LPXN_HUMAN	sp|O60711|LPXN_HUMAN	__Other	sp|O60711|LPXN_HUMAN	15	15	15	1	15	15	15	48.2	48.2	48.2	43.332	386	386	0	102.95				778	0	0	0	LPXN_HUMAN O60711	sp|O60711|LPXN_HUMAN Leupaxin OS=Homo sapiens OX=9606 GN=LPXN PE=1 SV=1	9404	1	0	LPXN	LDPL	protein-coding	11q12.1	leupaxin	.	15.838	16.4846	17.2539	15.375	16.8975	15.2088	15.0583	15.8764	16.777	17.3497	1.02934	-0.849589
sp|P30504|1C04_HUMAN	sp|P30504|1C04_HUMAN	sp|P30504|1C04_HUMAN	__Other	sp|P30504|1C04_HUMAN	17	5	3	1	17	5	3	50.5	16.4	7.9	40.994	366	366	0	65.092				2045	0	0	0	---	sp|P30504|1C04_HUMAN HLA class I histocompatibility antigen, Cw-4 alpha chain OS=Homo sapiens OX=9606 GN=HLA-C PE=1 SV=1	---	0	1	---	---	---	---	---	.	15.2252	14.3615	13.547	14.6934	14.8476	13.4288	12.907	15.1434	15.3289	13.2989	-0.602419	0.544057
sp|P46821|MAP1B_HUMAN	sp|P46821|MAP1B_HUMAN	sp|P46821|MAP1B_HUMAN	__Other	sp|P46821|MAP1B_HUMAN	107	107	105	1	107	107	105	54.9	54.9	54	270.63	2468	2468	0	323.31				2343	0	0	0	MAP1B_HUMAN P46821	sp|P46821|MAP1B_HUMAN Microtubule-associated protein 1B OS=Homo sapiens OX=9606 GN=MAP1B PE=1 SV=2	4131	1	0	MAP1B	FUTSCH MAP5 PPP1R102	protein-coding	5q13.2	microtubule associated protein 1B ||| Microtubule-associated protein 1B	.	19.7236	19.9876	21.0668	19.8792	20.7338	18.3856	18.7176	19.1953	20.0938	20.2347	1.27847	0.0908582
sp|P11464|PSG1_HUMAN;sp|Q00887|PSG9_HUMAN;sp|Q00888|PSG4_HUMAN;sp|Q00889|PSG6_HUMAN;sp|Q13046|PSG7_HUMAN;sp|Q15238|PSG5_HUMAN;sp|Q16557|PSG3_HUMAN;sp|Q9UQ74|PSG8_HUMAN	sp|P11464|PSG1_HUMAN;sp|Q13046|PSG7_HUMAN;sp|Q00887|PSG9_HUMAN;sp|Q00889|PSG6_HUMAN;sp|Q9UQ74|PSG8_HUMAN;sp|Q16557|PSG3_HUMAN;sp|Q15238|PSG5_HUMAN;sp|Q00888|PSG4_HUMAN	sp|P11464|PSG1_HUMAN;sp|Q00887|PSG9_HUMAN;sp|Q00888|PSG4_HUMAN;sp|Q00889|PSG6_HUMAN;sp|Q13046|PSG7_HUMAN;sp|Q15238|PSG5_HUMAN;sp|Q16557|PSG3_HUMAN;sp|Q9UQ74|PSG8_HUMAN	__Other	sp|P11464|PSG1_HUMAN;sp|Q00887|PSG9_HUMAN;sp|Q00889|PSG6_HUMAN;sp|Q13046|PSG7_HUMAN;sp|Q16557|PSG3_HUMAN;sp|Q9UQ74|PSG8_HUMAN	4;3;3;3;2;2;1;1	4;3;3;3;2;2;1;1	4;3;3;3;2;2;1;1	8	4	4	4	10.7	10.7	10.7	47.222	419	419;419;426;435;426;428;335;419	0	6.0993				1564	0	0	0	PSG1_HUMAN P11464 PSG3_HUMAN Q16557 PSG4_HUMAN Q00888 PSG5_HUMAN Q15238 PSG6_HUMAN Q00889 PSG8_HUMAN Q9UQ74 PSG9_HUMAN Q00887 PSG7_HUMAN Q13046	sp|P11464|PSG1_HUMAN Pregnancy-specific beta-1-glycoprotein 1 OS=Homo sapiens OX=9606 GN=PSG1 PE=1 SV=1;sp|Q13046|PSG7_HUMAN Putative pregnancy-specific beta-1-glycoprotein 7 OS=Homo sapiens OX=9606 GN=PSG7 PE=5 SV=3;sp|Q00887|PSG9_HUMAN Pregnancy-specific	5669 5671 5672 5673 5675 440533 5678 5676	8	2	PSG1 PSG3 PSG4 PSG5 PSG6 PSG8 PSG9 PSG7	B1G1 CD66f DHFRP2 FL-NCA-1/2 PBG1 PS-beta-C/D PS-beta-G-1 PSBG-1 PSBG1 PSG95 PSGGA PSGIIA SP1 PSBG-4 PSBG-9 PSG9 FL-NCA-3 PSG PSBG-10 PSBG-12 PSBG-6 PSG10 PSGGB PSG1 PS34 PSBG-11 PSG11 PSGII PSBG-7	protein-coding	19q13.2!19q13.31	pregnancy specific beta-1-glycoprotein 1 ||| Pregnancy-specific beta-1-glycoprotein 1 ||| pregnancy specific beta-1-glycoprotein 3 ||| Pregnancy-specific beta-1-glycoprotein 3 ||| pregnancy specific beta-1-glycoprotein 4 ||| Pregnancy-specific beta-1-glycoprotein 4 ||| pregnancy specific beta-1-glycoprotein 5 ||| Pregnancy-specific beta-1-glycoprotein 5 ||| pregnancy specific beta-1-glycoprotein …	.	14.1196	13.8077	15.7805	12.832	13.1092	13.3692	13.0253	13.5896	13.1396	13.1697	2.27858	-0.669851
sp|P00813|ADA_HUMAN	sp|P00813|ADA_HUMAN	sp|P00813|ADA_HUMAN	__Other	sp|P00813|ADA_HUMAN	16	16	16	1	16	16	16	56.7	56.7	56.7	40.764	363	363	0	111.33				1258	0	0	0	ADA_HUMAN P00813	sp|P00813|ADA_HUMAN Adenosine deaminase OS=Homo sapiens OX=9606 GN=ADA PE=1 SV=3	100	1	0	ADA	---	protein-coding	20q13.12	adenosine deaminase	.	15.5716	16.5542	16.1017	15.4404	16.9308	16.2943	18.2221	15.3559	15.8047	15.7435	-0.134983	-0.796327
sp|Q14123|PDE1C_HUMAN	sp|Q14123|PDE1C_HUMAN	sp|Q14123|PDE1C_HUMAN	__Other	sp|Q14123|PDE1C_HUMAN	12	12	12	1	12	12	12	20.5	20.5	20.5	80.759	709	709	0	65.7				3499	0	0	0	PDE1C_HUMAN Q14123	sp|Q14123|PDE1C_HUMAN Calcium/calmodulin-dependent 3,5-cyclic nucleotide phosphodiesterase 1C OS=Homo sapiens OX=9606 GN=PDE1C PE=1 SV=1	5137	1	0	PDE1C	DFNA74 Hcam3 cam-PDE-1C hCam-3	protein-coding	7p14.3	phosphodiesterase 1C ||| Calcium/calmodulin-dependent 3',5'-cyclic nucleotide phosphodiesterase 1C	.	14.5228	14.7358	16.745	13.9944	14.2272	14.1506	14.0327	14.5857	13.905	14.0314	2.28604	-0.464547
sp|P59768|GBG2_HUMAN	sp|P59768|GBG2_HUMAN	sp|P59768|GBG2_HUMAN	__Other	sp|P59768|GBG2_HUMAN	4	4	4	1	4	4	4	52.1	52.1	52.1	7.8501	71	71	0	13.283				2744	0	0	0	GBG2_HUMAN P59768	sp|P59768|GBG2_HUMAN Guanine nucleotide-binding protein G(I)/G(S)/G(O) subunit gamma-2 OS=Homo sapiens OX=9606 GN=GNG2 PE=1 SV=2	54331	1	0	GNG2	---	protein-coding	14q22.1	G-protein subunit gamma 2 ||| Guanine nucleotide-binding protein G(I)/G(S)/G(O) subunit gamma-2	.		13.0878	13.1179	12.3746	15.1206	12.1778	12.328	12.6056	12.6135	12.9233	0.21023	-0.533087
sp|P63261|ACTG_HUMAN	sp|P63261|ACTG_HUMAN	sp|P63261|ACTG_HUMAN	__Other	sp|P63261|ACTG_HUMAN	30	1	1	1	30	1	1	78.7	4.5	4.5	41.792	375	375	0	17.934				2918	0	0	0	ACTG_HUMAN P63261	sp|P63261|ACTG_HUMAN Actin, cytoplasmic 2 OS=Homo sapiens OX=9606 GN=ACTG1 PE=1 SV=1	71	1	0	ACTG1	ACT ACTG DFNA20 DFNA26 HEL-176	protein-coding	17q25.3	actin gamma 1 ||| Actin, cytoplasmic 2	.		12.5333	12.0043	11.3482	11.6139	11.2821	12.6898	11.8221	12.8891	14.0534	-0.208527	-0.864632
sp|P06732|KCRM_HUMAN;sp|P12277|KCRB_HUMAN	sp|P12277|KCRB_HUMAN;sp|P06732|KCRM_HUMAN	sp|P06732|KCRM_HUMAN;sp|P12277|KCRB_HUMAN	__Other	sp|P12277|KCRB_HUMAN	22;1	22;1	22;1	2	22	22	22	71.9	71.9	71.9	42.644	381	381;381	0	323.31				1585	0	0	0	KCRB_HUMAN P12277 KCRM_HUMAN P06732	sp|P12277|KCRB_HUMAN Creatine kinase B-type OS=Homo sapiens OX=9606 GN=CKB PE=1 SV=1	1152 1158	2	5	CKB CKM	B-CK BCK CKBB CPK-B HEL-211 HEL-S-29 CKMM CPK-M M-CK	protein-coding	14q32.33!19q13.32	creatine kinase B ||| Creatine kinase B-type ||| creatine kinase, M-type ||| Creatine kinase M-type	.	17.3962	18.0449	18.2798	16.8701	17.2708	16.7151	17.8311	18.9159	19.2948	17.3483	0.464037	-0.945606
sp|Q9H1C4|UN93B_HUMAN	sp|Q9H1C4|UN93B_HUMAN	sp|Q9H1C4|UN93B_HUMAN	__Other	sp|Q9H1C4|UN93B_HUMAN	7	7	7	1	7	7	7	12.1	12.1	12.1	66.63	597	597	0	28.872				6945	0	0	0	UN93B_HUMAN Q9H1C4	sp|Q9H1C4|UN93B_HUMAN Protein unc-93 homolog B1 OS=Homo sapiens OX=9606 GN=UNC93B1 PE=1 SV=2	81622	1	0	UNC93B1	IIAE1 UNC93 UNC93B Unc-93B1	protein-coding	11q13.2	unc-93 homolog B1, TLR signaling regulator ||| Protein unc-93 homolog B1	.	14.3516	14.8348	13.9716	14.6836	13.974	16.5823	14.6493	14.9335	13.6552	13.8701	-0.568331	0.143675
sp|P98171|RHG04_HUMAN	sp|P98171|RHG04_HUMAN	sp|P98171|RHG04_HUMAN	__Other	sp|P98171|RHG04_HUMAN	3	3	3	1	3	3	3	3.5	3.5	3.5	105.02	946	946	0	2.9117				3022	0	0	0	RHG04_HUMAN P98171	sp|P98171|RHG04_HUMAN Rho GTPase-activating protein 4 OS=Homo sapiens OX=9606 GN=ARHGAP4 PE=1 SV=2	393	1	0	ARHGAP4	C1 RGC1 RhoGAP4 SrGAP4 p115	protein-coding	Xq28	Rho GTPase activating protein 4 ||| Rho GTPase-activating protein 4	.		11.7479	11.0147	10.8358	12.5734	11.2402	13.2602	10.6916	11.6925	10.7669	-0.494706	-0.673593
sp|P15144|AMPN_HUMAN	sp|P15144|AMPN_HUMAN	sp|P15144|AMPN_HUMAN	__Other	sp|P15144|AMPN_HUMAN	37	37	37	1	37	37	37	45.9	45.9	45.9	109.54	967	967	0	179.96				1657	0	0	0	AMPN_HUMAN P15144	sp|P15144|AMPN_HUMAN Aminopeptidase N OS=Homo sapiens OX=9606 GN=ANPEP PE=1 SV=4	290	1	0	ANPEP	APN CD13 GP150 LAP1 P150 PEPN	protein-coding	15q26.1	alanyl aminopeptidase, membrane ||| Aminopeptidase N	.	18.0073	18.2877	17.8984	17.2288	19.8774	17.2012	17.5108	17.3397	18.8537	18.1917	-0.114273	-0.783933
sp|O95633|FSTL3_HUMAN	sp|O95633|FSTL3_HUMAN	sp|O95633|FSTL3_HUMAN	__Other	sp|O95633|FSTL3_HUMAN	2	2	2	1	2	2	2	11.8	11.8	11.8	27.663	263	263	0	7.3229				1170	0	0	0	FSTL3_HUMAN O95633	sp|O95633|FSTL3_HUMAN Follistatin-related protein 3 OS=Homo sapiens OX=9606 GN=FSTL3 PE=1 SV=1	10272	1	0	FSTL3	FLRG FSRP	protein-coding	19p13.3	follistatin like 3 ||| Follistatin-related protein 3	.	13.356	12.8398	13.0721	11.9927	14.4319	11.5594	12.0603	11.7781	11.9368	12.5257	0.652447	-0.426959
sp|Q9UPY5|XCT_HUMAN	sp|Q9UPY5|XCT_HUMAN	sp|Q9UPY5|XCT_HUMAN	__Other	sp|Q9UPY5|XCT_HUMAN	7	7	7	1	7	7	7	14.2	14.2	14.2	55.422	501	501	0	28.525				8184	0	0	0	XCT_HUMAN Q9UPY5	sp|Q9UPY5|XCT_HUMAN Cystine/glutamate transporter OS=Homo sapiens OX=9606 GN=SLC7A11 PE=1 SV=1	23657	1	0	SLC7A11	CCBR1 xCT	protein-coding	4q28.3	solute carrier family 7 member 11 ||| Cystine/glutamate transporter	.	15.3253	16.1816	15.3444	15.9742	16.9515	16.4598	14.6129	14.7284	15.8846	17.0911	-0.536481	0.0933039
sp|P52895|AK1C2_HUMAN	sp|P52895|AK1C2_HUMAN	sp|P52895|AK1C2_HUMAN	__Other	sp|P52895|AK1C2_HUMAN	17	4	4	1	17	4	4	63.8	17.3	17.3	36.735	323	323	0	18.554				2588	0	0	0	AK1C2_HUMAN P52895	sp|P52895|AK1C2_HUMAN Aldo-keto reductase family 1 member C2 OS=Homo sapiens OX=9606 GN=AKR1C2 PE=1 SV=3	1646	1	0	AKR1C2	AKR1C-pseudo BABP DD DD-2 DD/BABP DD2 DDH2 HAKRD HBAB MCDR2 SRXY8 TDD	protein-coding	10p15.1	aldo-keto reductase family 1 member C2	.	11.8053	13.2622	12.6625	13.1512	13.8056	15.0209	12.2576	12.5376	13.7813	12.4684	-0.548119	-0.0594616
sp|O60701|UGDH_HUMAN	sp|O60701|UGDH_HUMAN	sp|O60701|UGDH_HUMAN	__Other	sp|O60701|UGDH_HUMAN	34	34	34	1	34	34	34	77.7	77.7	77.7	55.023	494	494	0	323.31				776	0	0	0	UGDH_HUMAN O60701	sp|O60701|UGDH_HUMAN UDP-glucose 6-dehydrogenase OS=Homo sapiens OX=9606 GN=UGDH PE=1 SV=1	7358	1	0	UGDH	GDH UDP-GlcDH UDPGDH UGD	protein-coding	4p14	UDP-glucose 6-dehydrogenase	.	20.3743	19.3908	18.5114	20.8416	19.9285	19.9218	17.9805	18.6897	19.192	18.7446	-0.714852	1.61534
sp|O95864|FADS2_HUMAN	sp|O95864|FADS2_HUMAN	sp|O95864|FADS2_HUMAN	__Other	sp|O95864|FADS2_HUMAN	7	6	6	1	7	6	6	16.7	15.1	15.1	52.259	444	444	0	14.037				1209	0	0	0	FADS2_HUMAN O95864	sp|O95864|FADS2_HUMAN Acyl-CoA 6-desaturase OS=Homo sapiens OX=9606 GN=FADS2 PE=1 SV=1	9415	1	0	FADS2	D6D DES6 FADSD6 LLCDL2 SLL0262 TU13	protein-coding	11q12.2	fatty acid desaturase 2 ||| Acyl-CoA 6-desaturase	.	13.9674	14.0919	15.3241	12.9603	13.2689	13.3647	12.7759	14.3721	13.4943	14.8898	1.51782	-0.845978
sp|P50238|CRIP1_HUMAN	sp|P50238|CRIP1_HUMAN	sp|P50238|CRIP1_HUMAN	__Other	sp|P50238|CRIP1_HUMAN	3	3	3	1	3	3	3	57.1	57.1	57.1	8.5328	77	77	0	6.1446				2471	0	0	0	CRIP1_HUMAN P50238	sp|P50238|CRIP1_HUMAN Cysteine-rich protein 1 OS=Homo sapiens OX=9606 GN=CRIP1 PE=1 SV=3	1396	1	0	CRIP1	CRHP CRIP CRP-1 CRP1	protein-coding	14q32.33	cysteine rich protein 1 ||| Cysteine-rich protein 1	.	14.9918	15.279	15.5144	15.3124	14.4686	13.9335	16.49	16.3064	14.6371	14.3431	0.388744	0.186706
sp|Q8NGC4|O10G3_HUMAN	sp|Q8NGC4|O10G3_HUMAN	sp|Q8NGC4|O10G3_HUMAN	__Other	sp|Q8NGC4|O10G3_HUMAN	1	1	1	1	1	1	1	3.2	3.2	3.2	35.054	313	313	1	-2	+			5385	0	0	0	O10G3_HUMAN Q8NGC4	sp|Q8NGC4|O10G3_HUMAN Olfactory receptor 10G3 OS=Homo sapiens OX=9606 GN=OR10G3 PE=3 SV=1	26533	1	0	OR10G3	OR14-40	protein-coding	14q11.2	olfactory receptor family 10 subfamily G member 3 ||| Olfactory receptor 10G3	.		11.5936	12.2704	9.36181	11.1353	11.8835	12.0414	11.2294	11.2972	12.0909	0.856669	-2.05192
sp|P48060|GLIP1_HUMAN	sp|P48060|GLIP1_HUMAN	sp|P48060|GLIP1_HUMAN	__Other	sp|P48060|GLIP1_HUMAN	5	5	5	1	5	5	5	25.9	25.9	25.9	30.366	266	266	0	63.678				2362	0	0	0	GLIP1_HUMAN P48060	sp|P48060|GLIP1_HUMAN Glioma pathogenesis-related protein 1 OS=Homo sapiens OX=9606 GN=GLIPR1 PE=1 SV=3	11010	1	0	GLIPR1	CRISP7 GLIPR RTVP1	protein-coding	12q21.2	GLI pathogenesis related 1 ||| Glioma pathogenesis-related protein 1	.	13.7858	15.0148	15.1815	14.9539	16.0536	14.2422	12.8646	14.7575	15.1193	15.2917	0.37342	0.145855
sp|P04155|TFF1_HUMAN	sp|P04155|TFF1_HUMAN	sp|P04155|TFF1_HUMAN	__Other	sp|P04155|TFF1_HUMAN	3	3	3	1	3	3	3	54.8	54.8	54.8	9.1494	84	84	0	8.639				1309	0	0	0	TFF1_HUMAN P04155	sp|P04155|TFF1_HUMAN Trefoil factor 1 OS=Homo sapiens OX=9606 GN=TFF1 PE=1 SV=1	7031	1	0	TFF1	BCEI D21S21 HP1.A HPS2 pNR-2 pS2	protein-coding	21q22.3	trefoil factor 1	.	14.002	14.0112	13.3515	13.4708	12.7676	15.763	13.1176	13.0102	13.8726	13.6504	-0.273958	-0.154686
sp|Q12882|DPYD_HUMAN	sp|Q12882|DPYD_HUMAN	sp|Q12882|DPYD_HUMAN	__Other	sp|Q12882|DPYD_HUMAN	1	1	1	1	1	1	1	1.6	1.6	1.6	111.4	1025	1025	0.00038004	2.5598				3272	0	0	0	DPYD_HUMAN Q12882	sp|Q12882|DPYD_HUMAN Dihydropyrimidine dehydrogenase [NADP(+)] OS=Homo sapiens OX=9606 GN=DPYD PE=1 SV=2	1806	1	0	DPYD	DHP DHPDHASE DPD	protein-coding	1p21.3	dihydropyrimidine dehydrogenase ||| Dihydropyrimidine dehydrogenase [NADP(+)]	.		7.92273	9.80144	9.42078	8.21858		6.69269	8.57829	8.67115	8.85223	1.19642	0.815756
sp|Q9NYC9|DYH9_HUMAN	sp|Q9NYC9|DYH9_HUMAN	sp|Q9NYC9|DYH9_HUMAN	__Other	sp|Q9NYC9|DYH9_HUMAN	1	1	1	1	1	1	1	0.2	0.2	0.2	511.87	4486	4486	1	-2	+			7643	0	0	0	DYH9_HUMAN Q9NYC9	sp|Q9NYC9|DYH9_HUMAN Dynein heavy chain 9, axonemal OS=Homo sapiens OX=9606 GN=DNAH9 PE=1 SV=3	1770	1	0	DNAH9	CILD40 DNAH17L DNEL1 DYH9 Dnahc9 HL-20 HL20	protein-coding	17p12	dynein axonemal heavy chain 9 ||| Dynein heavy chain 9, axonemal	.	12.0883	12.2419	13.7154	12.3805	12.6229	11.1096	12.0849	13.1375	11.4168	11.2656	1.49875	0.163887
sp|Q9Y3E1|HDGR3_HUMAN	sp|Q9Y3E1|HDGR3_HUMAN	sp|Q9Y3E1|HDGR3_HUMAN	__Other	sp|Q9Y3E1|HDGR3_HUMAN	5	4	4	1	5	4	4	20.7	16.7	16.7	22.619	203	203	0	9.6703				8351	0	0	0	HDGR3_HUMAN Q9Y3E1	sp|Q9Y3E1|HDGR3_HUMAN Hepatoma-derived growth factor-related protein 3 OS=Homo sapiens OX=9606 GN=HDGFL3 PE=1 SV=1	50810	1	0	HDGFL3	CGI-142 HDGF-2 HDGF2 HDGFRP3 HRP-3	protein-coding	15q25.2	HDGF like 3 ||| Hepatoma-derived growth factor-related protein 3	.	15.4212	14.6512	15.2783	15.8918	14.5309	13.8955	14.5747	13.3996	13.2061	15.0217	0.803477	1.41698
sp|O14944|EREG_HUMAN	sp|O14944|EREG_HUMAN	sp|O14944|EREG_HUMAN	__Other	sp|O14944|EREG_HUMAN	2	2	2	1	2	2	2	10.1	10.1	10.1	19.044	169	169	0	3.6275				454	0	0	0	EREG_HUMAN O14944	sp|O14944|EREG_HUMAN Proepiregulin OS=Homo sapiens OX=9606 GN=EREG PE=1 SV=1	2069	1	0	EREG	EPR ER Ep	protein-coding	4q13.3	epiregulin ||| Proepiregulin	.	14.4859	13.6504	12.7387	15.0854	13.3123	12.5393	13.1855	14.6997	12.814	13.4038	-0.733598	1.61307
sp|P55042|RAD_HUMAN	sp|P55042|RAD_HUMAN	sp|P55042|RAD_HUMAN	__Other	sp|P55042|RAD_HUMAN	2	2	2	1	2	2	2	9.1	9.1	9.1	33.245	308	308	0	48.883				2662	0	0	0	RAD_HUMAN P55042	sp|P55042|RAD_HUMAN GTP-binding protein RAD OS=Homo sapiens OX=9606 GN=RRAD PE=1 SV=2	6236	1	0	RRAD	RAD RAD1 REM3	protein-coding	16q22.1	RRAD, Ras related glycolysis inhibitor and calcium channel regulator ||| GTP-binding protein RAD	.	12.5531	13.6129	14.7801	12.7271	12.9663	11.9871	12.1864	12.964	14.0374	13.4269	1.64568	-0.40732
sp|P13928|ANXA8_HUMAN	sp|P13928|ANXA8_HUMAN	sp|P13928|ANXA8_HUMAN	__Other	sp|P13928|ANXA8_HUMAN	11	1	1	1	11	1	1	41.3	7.6	7.6	36.881	327	327	0.00075141	2.2373				1623	0	0	0	ANXA8_HUMAN P13928	sp|P13928|ANXA8_HUMAN Annexin A8 OS=Homo sapiens OX=9606 GN=ANXA8 PE=1 SV=3	653145 728113	2	2	ANXA8 ANXA8L1	ANX8 CH17-360D5.2 ANXA8 ANXA8L2 VAC-beta bA145E20.2	protein-coding	10q11.22	annexin A8 ||| annexin A8 like 1	.		8.57769			7.28689	9.38133	7.12566	7.66122	8.78854	9.56307	NA	NA
sp|Q15166|PON3_HUMAN	sp|Q15166|PON3_HUMAN	sp|Q15166|PON3_HUMAN	__Other	sp|Q15166|PON3_HUMAN	1	1	1	1	1	1	1	2.8	2.8	2.8	39.607	354	354	0.006035	1.3132				3698	0	0	0	PON3_HUMAN Q15166	sp|Q15166|PON3_HUMAN Serum paraoxonase/lactonase 3 OS=Homo sapiens OX=9606 GN=PON3 PE=1 SV=3	5446	1	0	PON3	---	protein-coding	7q21.3	paraoxonase 3 ||| Serum paraoxonase/lactonase 3	.	11.7031	11.6181	10.8936	11.0735	11.3559	13.4377	10.5854	11.6531	10.8157	10.6862	-0.419049	-0.239104
sp|P05107|ITB2_HUMAN	sp|P05107|ITB2_HUMAN	sp|P05107|ITB2_HUMAN	__Other	sp|P05107|ITB2_HUMAN	2	2	2	1	2	2	2	3.1	3.1	3.1	84.781	769	769	0	2.9717				1342	0	0	0	ITB2_HUMAN P05107	sp|P05107|ITB2_HUMAN Integrin beta-2 OS=Homo sapiens OX=9606 GN=ITGB2 PE=1 SV=2	3689	1	0	ITGB2	CD18 LAD LCAMB LFA-1 MAC-1 MF17 MFI7	protein-coding	21q22.3	integrin subunit beta 2 ||| Integrin beta-2	.	13.1852	12.0261	11.838	13.2618	11.3206	11.1381	10.6908	12.6698	12.7983	11.2728	-0.0357833	1.38804
sp|Q8N720|ZN655_HUMAN	sp|Q8N720|ZN655_HUMAN	sp|Q8N720|ZN655_HUMAN	__Other	sp|Q8N720|ZN655_HUMAN	2	2	2	1	2	2	2	3.7	3.7	3.7	57.406	491	491	0	3.5035				5212	0	0	0	ZN655_HUMAN Q8N720	sp|Q8N720|ZN655_HUMAN Zinc finger protein 655 OS=Homo sapiens OX=9606 GN=ZNF655 PE=1 SV=3	79027	1	0	ZNF655	VIK VIK-1	protein-coding	7q22.1	zinc finger protein 655	.	11.2488	11.5753	12.2638	12.9391	12.5403	10.7193	11.186	11.0781	10.5215	10.8357	0.753319	1.42863
sp|P09038|FGF2_HUMAN	sp|P09038|FGF2_HUMAN	sp|P09038|FGF2_HUMAN	__Other	sp|P09038|FGF2_HUMAN	5	5	5	1	5	5	5	16.7	16.7	16.7	30.77	288	288	0	9.5014				1460	0	0	0	FGF2_HUMAN P09038	sp|P09038|FGF2_HUMAN Fibroblast growth factor 2 OS=Homo sapiens OX=9606 GN=FGF2 PE=1 SV=3	2247	1	0	FGF2	BFGF FGF-2 FGFB HBGF-2	protein-coding	4q28.1	fibroblast growth factor 2	.	13.2009	15.2081	14.3137	14.3471	16.1652	14.0372	15.1269	13.8085	15.8753	15.813	-0.622199	-0.588735
sp|P68366|TBA4A_HUMAN	sp|P68366|TBA4A_HUMAN	sp|P68366|TBA4A_HUMAN	__Other	sp|P68366|TBA4A_HUMAN	25	4	4	1	25	4	4	61.6	12.1	12.1	49.924	448	448	0	79.435				2931	0	0	0	TBA4A_HUMAN P68366	sp|P68366|TBA4A_HUMAN Tubulin alpha-4A chain OS=Homo sapiens OX=9606 GN=TUBA4A PE=1 SV=1	7277	1	0	TUBA4A	ALS22 H2-ALPHA TUBA1	protein-coding	2q35	tubulin alpha 4a ||| Tubulin alpha-4A chain	.	16.9747	16.6891	17.007	17.095	17.0043	17.8216	14.982	16.2689	16.9265	15.5471	0.425497	0.513422
sp|O00469|PLOD2_HUMAN	sp|O00469|PLOD2_HUMAN	sp|O00469|PLOD2_HUMAN	__Other	sp|O00469|PLOD2_HUMAN	26	26	26	1	26	26	26	43.3	43.3	43.3	84.685	737	737	0	188.16				340	0	0	0	PLOD2_HUMAN O00469	sp|O00469|PLOD2_HUMAN Procollagen-lysine,2-oxoglutarate 5-dioxygenase 2 OS=Homo sapiens OX=9606 GN=PLOD2 PE=1 SV=2	5352	1	0	PLOD2	BRKS2 LH2 TLH	protein-coding	3q24	procollagen-lysine,2-oxoglutarate 5-dioxygenase 2	.	17.7081	18.3075	19.6825	18.0145	17.3796	17.1144	16.9648	17.9735	18.4125	18.8822	1.6295	-0.0384699
sp|Q86VY4|TSYL5_HUMAN;sp|Q9P2G4|MAP10_HUMAN	sp|Q86VY4|TSYL5_HUMAN;sp|Q9P2G4|MAP10_HUMAN	sp|Q86VY4|TSYL5_HUMAN;sp|Q9P2G4|MAP10_HUMAN	__Other	sp|Q86VY4|TSYL5_HUMAN	6;1	6;1	6;1	2	6	6	6	18.5	18.5	18.5	45.143	417	417;905	0	13.346				4847	0	0	0	MAP10_HUMAN Q9P2G4 TSYL5_HUMAN Q86VY4	sp|Q86VY4|TSYL5_HUMAN Testis-specific Y-encoded-like protein 5 OS=Homo sapiens OX=9606 GN=TSPYL5 PE=1 SV=2	54627 85453	2	5	MAP10 TSPYL5	KIAA1383 MTR120	protein-coding	1q42.2!8q22.1	microtubule associated protein 10 ||| Microtubule-associated protein 10 ||| TSPY like 5 ||| Testis-specific Y-encoded-like protein 5	.	10.9115	13.3727	12.546	12.7257	15.0868	12.3533	12.837	13.8154	12.5474	12.6951	-0.52984	-0.350183
sp|P82970|HMGN5_HUMAN	sp|P82970|HMGN5_HUMAN	sp|P82970|HMGN5_HUMAN	__Other	sp|P82970|HMGN5_HUMAN	7	7	7	1	7	7	7	29.1	29.1	29.1	31.524	282	282	0	88.529				2993	0	0	0	HMGN5_HUMAN P82970	sp|P82970|HMGN5_HUMAN High mobility group nucleosome-binding domain-containing protein 5 OS=Homo sapiens OX=9606 GN=HMGN5 PE=1 SV=1	79366	1	0	HMGN5	NBP-45 NSBP1	protein-coding	Xq21.1	high mobility group nucleosome binding domain 5 ||| High mobility group nucleosome-binding domain-containing protein 5	.	16.2747	15.2374	15.0551	16.4385	16.0999	14.1719	14.1118	16.1203	14.5122	14.9347	-0.12545	1.25791
sp|Q96B70|LENG9_HUMAN	sp|Q96B70|LENG9_HUMAN	sp|Q96B70|LENG9_HUMAN	__Other	sp|Q96B70|LENG9_HUMAN	1	1	1	1	1	1	1	1.8	1.8	1.8	53.166	501	501	0.0052128	1.3837				5902	0	0	0	LENG9_HUMAN Q96B70	sp|Q96B70|LENG9_HUMAN Leukocyte receptor cluster member 9 OS=Homo sapiens OX=9606 GN=LENG9 PE=2 SV=2	94059	1	0	LENG9	---	protein-coding	19q13.42	leukocyte receptor cluster member 9	.		11.9496	11.4488	11.3488	11.8512	13.2537	11.7982	12.5435	11.9903	10.0812	-0.340697	-0.440632
sp|Q9BX79|STRA6_HUMAN	sp|Q9BX79|STRA6_HUMAN	sp|Q9BX79|STRA6_HUMAN	__Other	sp|Q9BX79|STRA6_HUMAN	3	3	3	1	3	3	3	8.1	8.1	8.1	73.502	667	667	0	19.311				6738	0	0	0	STRA6_HUMAN Q9BX79	sp|Q9BX79|STRA6_HUMAN Receptor for retinol uptake STRA6 OS=Homo sapiens OX=9606 GN=STRA6 PE=1 SV=1	64220	1	0	STRA6	MCOPCB8 MCOPS9 PP14296	protein-coding	15q24.1	signaling receptor and transporter of retinol STRA6 ||| Receptor for retinol uptake STRA6	.	13.5124	13.3857	12.6241	12.1589	15.1509	12.7092	13.3187	13.5531	12.631	12.886	-0.504852	-0.970136
sp|Q9BY50|SC11C_HUMAN	sp|Q9BY50|SC11C_HUMAN	sp|Q9BY50|SC11C_HUMAN	__Other	sp|Q9BY50|SC11C_HUMAN	6	6	6	1	6	6	6	32.3	32.3	32.3	21.542	192	192	0	22.868				6769	0	0	0	SC11C_HUMAN Q9BY50	sp|Q9BY50|SC11C_HUMAN Signal peptidase complex catalytic subunit SEC11C OS=Homo sapiens OX=9606 GN=SEC11C PE=1 SV=3	90701	1	0	SEC11C	SEC11L3 SPC21 SPCS4C	protein-coding	18q21.32	SEC11 homolog C, signal peptidase complex subunit ||| Signal peptidase complex catalytic subunit SEC11C	.	14.0149	14.9693	14.7523	13.9856	16.7377	15.4311	14.3917	14.1597	14.3017	14.2004	0.00723123	-0.759414
sp|P37840|SYUA_HUMAN	sp|P37840|SYUA_HUMAN	sp|P37840|SYUA_HUMAN	__Other	sp|P37840|SYUA_HUMAN	8	8	6	1	8	8	6	82.9	82.9	76.4	14.46	140	140	0	41.77				2197	0	0	0	SYUA_HUMAN P37840	sp|P37840|SYUA_HUMAN Alpha-synuclein OS=Homo sapiens OX=9606 GN=SNCA PE=1 SV=1	6622	1	0	SNCA	NACP PARK1 PARK4 PD1	protein-coding	4q22.1	synuclein alpha ||| Alpha-synuclein	.	13.6929	15.7173	15.157	14.7561	17.181	14.9773	16.4029	14.719	14.7371	15.9381	-0.326549	-0.727492
sp|Q9UPS8|ANR26_HUMAN	sp|Q9UPS8|ANR26_HUMAN	sp|Q9UPS8|ANR26_HUMAN	__Other	sp|Q9UPS8|ANR26_HUMAN	2	2	2	1	2	2	2	1.3	1.3	1.3	196.41	1710	1710	0.00075282	2.2912				8172	0	0	0	ANR26_HUMAN Q9UPS8	sp|Q9UPS8|ANR26_HUMAN Ankyrin repeat domain-containing protein 26 OS=Homo sapiens OX=9606 GN=ANKRD26 PE=1 SV=4	22852	1	0	ANKRD26	THC2 bA145E8.1	protein-coding	10p12.1	ankyrin repeat domain 26 ||| Ankyrin repeat domain-containing protein 26	.		10.4829	10.7755	8.62073	10.157	9.40675	10.9781	10.0631	11.5441	10.5198	0.517362	-1.63741
sp|Q8TAD7|OCC1_HUMAN	sp|Q8TAD7|OCC1_HUMAN	sp|Q8TAD7|OCC1_HUMAN	__Other	sp|Q8TAD7|OCC1_HUMAN	3	3	3	1	3	3	3	57.1	57.1	57.1	6.4069	63	63	0	31.833				5413	0	0	0	OCC1_HUMAN Q8TAD7	sp|Q8TAD7|OCC1_HUMAN Overexpressed in colon carcinoma 1 protein OS=Homo sapiens OX=9606 GN=OCC1 PE=1 SV=2	387882	1	0	C12orf75	AGD3 OCC-1 OCC1	protein-coding	12q23.3	chromosome 12 open reading frame 75 ||| Overexpressed in colon carcinoma 1 protein	.	10.6031	13.0331	14.2313	11.8926	13.6928	11.9496	12.8904	11.9679	12.8222	13.7731	1.32877	-1.00989
sp|Q8NEV8|EXPH5_HUMAN	sp|Q8NEV8|EXPH5_HUMAN	sp|Q8NEV8|EXPH5_HUMAN	__Other	sp|Q8NEV8|EXPH5_HUMAN	2	2	2	1	2	2	2	0.8	0.8	0.8	222.52	1989	1989	0.0019873	2.0276				5351	0	0	0	EXPH5_HUMAN Q8NEV8	sp|Q8NEV8|EXPH5_HUMAN Exophilin-5 OS=Homo sapiens OX=9606 GN=EXPH5 PE=1 SV=3	23086	1	0	EXPH5	SLAC2-B SLAC2B	protein-coding	11q22.3	exophilin 5 ||| Exophilin-5	.	13.4413	12.7156	11.8204	13.7796	12.5541	13.4534	11.5617	12.9526	11.6703	11.3824	-0.576413	1.38275
sp|Q12797|ASPH_HUMAN	sp|Q12797|ASPH_HUMAN	sp|Q12797|ASPH_HUMAN	__Other	sp|Q12797|ASPH_HUMAN	44	44	44	1	44	44	44	53.4	53.4	53.4	85.862	758	758	0	323.31				3258	0	0	0	ASPH_HUMAN Q12797	sp|Q12797|ASPH_HUMAN Aspartyl/asparaginyl beta-hydroxylase OS=Homo sapiens OX=9606 GN=ASPH PE=1 SV=3	444	1	0	ASPH	AAH BAH CASQ2BP1 FDLAB HAAH JCTN junctin	protein-coding	8q12.3	aspartate beta-hydroxylase ||| Aspartyl/asparaginyl beta-hydroxylase	.	20.0873	19.6362	18.782	20.3984	19.0822	20.3587	17.7322	20.1336	19.5229	19.9078	-0.707766	0.908669
sp|Q9UI42|CBPA4_HUMAN	sp|Q9UI42|CBPA4_HUMAN	sp|Q9UI42|CBPA4_HUMAN	__Other	sp|Q9UI42|CBPA4_HUMAN	10	10	10	1	10	10	10	35.4	35.4	35.4	47.351	421	421	0	45.338				7954	0	0	0	CBPA4_HUMAN Q9UI42	sp|Q9UI42|CBPA4_HUMAN Carboxypeptidase A4 OS=Homo sapiens OX=9606 GN=CPA4 PE=1 SV=2	51200	1	0	CPA4	CPA3	protein-coding	7q32.2	carboxypeptidase A4	.	14.9409	15.46	16.6373	14.3847	15.8268	14.2848	14.3126	15.224	14.6236	16.111	1.46172	-0.790895
sp|Q13751|LAMB3_HUMAN	sp|Q13751|LAMB3_HUMAN	sp|Q13751|LAMB3_HUMAN	__Other	sp|Q13751|LAMB3_HUMAN	52	52	52	1	52	52	52	55	55	55	129.57	1172	1172	0	323.31				3458	0	0	0	LAMB3_HUMAN Q13751	sp|Q13751|LAMB3_HUMAN Laminin subunit beta-3 OS=Homo sapiens OX=9606 GN=LAMB3 PE=1 SV=1	3914	1	0	LAMB3	AI1A BM600-125KDA LAM5 LAMNB1	protein-coding	1q32.2	laminin subunit beta 3 ||| Laminin subunit beta-3	.	18.5335	17.8529	17.2175	18.9201	16.8094	17.7878	16.6555	19.056	17.0307	17.4501	-0.398344	1.30418
sp|P16035|TIMP2_HUMAN	sp|P16035|TIMP2_HUMAN	sp|P16035|TIMP2_HUMAN	__Other	sp|P16035|TIMP2_HUMAN	8	8	8	1	8	8	8	40.9	40.9	40.9	24.399	220	220	0	27.912				1685	0	0	0	TIMP2_HUMAN P16035	sp|P16035|TIMP2_HUMAN Metalloproteinase inhibitor 2 OS=Homo sapiens OX=9606 GN=TIMP2 PE=1 SV=2	7077	1	0	TIMP2	CSC-21K DDC8	protein-coding	17q25.3	TIMP metallopeptidase inhibitor 2 ||| Metalloproteinase inhibitor 2	.	16.9307	15.8987	16.0254	17.38	15.5582	14.6071	14.6311	16.3864	15.3695	15.8505	0.29935	1.65403
sp|P30838|AL3A1_HUMAN	sp|P30838|AL3A1_HUMAN	sp|P30838|AL3A1_HUMAN	__Other	sp|P30838|AL3A1_HUMAN	15	14	14	1	15	14	14	47.7	45	45	50.394	453	453	0	52.487				2060	0	0	0	AL3A1_HUMAN P30838	sp|P30838|AL3A1_HUMAN Aldehyde dehydrogenase, dimeric NADP-preferring OS=Homo sapiens OX=9606 GN=ALDH3A1 PE=1 SV=3	218	1	0	ALDH3A1	ALDH3 ALDHIII	protein-coding	17p11.2	aldehyde dehydrogenase 3 family member A1 ||| Aldehyde dehydrogenase, dimeric NADP-preferring	.	16.6125	16.7185	16.1607	16.1874	18.2355	17.7136	15.7592	15.8402	16.3011	16.0859	-0.374783	-0.348086
sp|Q92903|CDS1_HUMAN	sp|Q92903|CDS1_HUMAN	sp|Q92903|CDS1_HUMAN	__Other	sp|Q92903|CDS1_HUMAN	3	2	2	1	3	2	2	11.5	7.8	7.8	53.303	461	461	0	3.9782				5777	0	0	0	CDS1_HUMAN Q92903	sp|Q92903|CDS1_HUMAN Phosphatidate cytidylyltransferase 1 OS=Homo sapiens OX=9606 GN=CDS1 PE=2 SV=2	1040	1	0	CDS1	CDS-1	protein-coding	4q21.23	CDP-diacylglycerol synthase 1 ||| Phosphatidate cytidylyltransferase 1	.	14.6046	13.6769	12.9548	14.7431	12.5029	13.8174	12.6904	14.576	12.5729	12.8201	-0.379899	1.40842
sp|Q9Y2J8|PADI2_HUMAN	sp|Q9Y2J8|PADI2_HUMAN	sp|Q9Y2J8|PADI2_HUMAN	__Other	sp|Q9Y2J8|PADI2_HUMAN	1	1	1	1	1	1	1	2.6	2.6	2.6	75.563	665	665	0.0028378	1.8686				8260	0	0	0	PADI2_HUMAN Q9Y2J8	sp|Q9Y2J8|PADI2_HUMAN Protein-arginine deiminase type-2 OS=Homo sapiens OX=9606 GN=PADI2 PE=1 SV=2	11240	1	0	PADI2	PAD-H19 PAD2 PDI2	protein-coding	1p36.13	peptidyl arginine deiminase 2 ||| Protein-arginine deiminase type-2	.		8.64133	7.82504	8.60582	8.47522	8.84079	10.1075	10.2046	8.0001	8.13699	-0.949474	-0.168688
sp|P00749|UROK_HUMAN	sp|P00749|UROK_HUMAN	sp|P00749|UROK_HUMAN	__Other	sp|P00749|UROK_HUMAN	17	17	17	1	17	17	17	42.5	42.5	42.5	48.507	431	431	0	82.731				1256	0	0	0	UROK_HUMAN P00749	sp|P00749|UROK_HUMAN Urokinase-type plasminogen activator OS=Homo sapiens OX=9606 GN=PLAU PE=1 SV=2	5328	1	0	PLAU	ATF BDPLT5 QPD UPA URK u-PA	protein-coding	10q22.2	plasminogen activator, urokinase ||| Urokinase-type plasminogen activator	.	18.238	16.6691	15.8403	18.459	15.6438	16.172	15.9307	16.9398	16.0948	16.7159	-0.634229	1.9845
sp|P49703|ARL4D_HUMAN;sp|P56559|ARL4C_HUMAN	sp|P56559|ARL4C_HUMAN;sp|P49703|ARL4D_HUMAN	sp|P49703|ARL4D_HUMAN;sp|P56559|ARL4C_HUMAN	__Other	sp|P49703|ARL4D_HUMAN;sp|P56559|ARL4C_HUMAN	2;1	2;1	2;1	2	2	2	2	14.6	14.6	14.6	21.487	192	192;201	0	12.614				2715	0	0	0	ARL4C_HUMAN P56559 ARL4D_HUMAN P49703	sp|P56559|ARL4C_HUMAN ADP-ribosylation factor-like protein 4C OS=Homo sapiens OX=9606 GN=ARL4C PE=1 SV=1;sp|P49703|ARL4D_HUMAN ADP-ribosylation factor-like protein 4D OS=Homo sapiens OX=9606 GN=ARL4D PE=1 SV=2	10123 379	2	5	ARL4C ARL4D	ARL7 LAK ARF4L ARL6	protein-coding	2q37.1!17q21.31	ADP ribosylation factor like GTPase 4C ||| ADP-ribosylation factor-like protein 4C ||| ADP ribosylation factor like GTPase 4D ||| ADP-ribosylation factor-like protein 4D	.	14.2248	13.3738	13.9442	14.3898	12.842	12.4814	12.2443	14.6207	13.1794	12.6111	0.655109	1.10069
sp|Q6UVY6|MOXD1_HUMAN	sp|Q6UVY6|MOXD1_HUMAN	sp|Q6UVY6|MOXD1_HUMAN	__Other	sp|Q6UVY6|MOXD1_HUMAN	3	3	3	1	3	3	3	6	6	6	69.652	613	613	0	8.4435				4505	0	0	0	MOXD1_HUMAN Q6UVY6	sp|Q6UVY6|MOXD1_HUMAN DBH-like monooxygenase protein 1 OS=Homo sapiens OX=9606 GN=MOXD1 PE=1 SV=1	26002	1	0	MOXD1	MOX PRO5780 dJ248E1.1	protein-coding	6q23.2	monooxygenase DBH like 1 ||| DBH-like monooxygenase protein 1	.	12.7511	12.7686	13.9555	12.4841	12.6311	11.547	11.7467	13.9837	12.127	12.7462	1.30284	-0.168515
sp|P09936|UCHL1_HUMAN	sp|P09936|UCHL1_HUMAN	sp|P09936|UCHL1_HUMAN	__Other	sp|P09936|UCHL1_HUMAN	15	15	15	1	15	15	15	75.8	75.8	75.8	24.824	223	223	0	323.31				1490	0	0	0	UCHL1_HUMAN P09936	sp|P09936|UCHL1_HUMAN Ubiquitin carboxyl-terminal hydrolase isozyme L1 OS=Homo sapiens OX=9606 GN=UCHL1 PE=1 SV=2	7345	1	0	UCHL1	HEL-117 HEL-S-53 NDGOA PARK5 PGP-9.5 PGP9.5 PGP95 SPG79 Uch-L1	protein-coding	4p13	ubiquitin C-terminal hydrolase L1 ||| Ubiquitin carboxyl-terminal hydrolase isozyme L1	.	18.1207	19.1088	19.0803	17.4605	19.3596	19.3482	18.6333	17.6102	19.9625	19.5579	0.203774	-1.4161
sp|Q04912|RON_HUMAN	sp|Q04912|RON_HUMAN	sp|Q04912|RON_HUMAN	__Other	sp|Q04912|RON_HUMAN	12	11	11	1	12	11	11	12.6	12.1	12.1	152.24	1400	1400	0	40.756				3140	0	0	0	RON_HUMAN Q04912	sp|Q04912|RON_HUMAN Macrophage-stimulating protein receptor OS=Homo sapiens OX=9606 GN=MST1R PE=1 SV=3	4486	1	0	MST1R	CD136 CDw136 NPCA3 PTK8 RON SEA	protein-coding	3p21.31	macrophage stimulating 1 receptor ||| Macrophage-stimulating protein receptor	.	14.4059	15.0103	14.4733	14.8657	14.0264	15.9857	13.5852	16.1661	14.2962	14.4354	-0.255927	0.136471
sp|P0CG29|GST2_HUMAN;sp|P0CG30|GSTT2_HUMAN;sp|P30711|GSTT1_HUMAN	sp|P0CG30|GSTT2_HUMAN;sp|P0CG29|GST2_HUMAN;sp|P30711|GSTT1_HUMAN	sp|P0CG29|GST2_HUMAN;sp|P0CG30|GSTT2_HUMAN;sp|P30711|GSTT1_HUMAN	__Other	sp|P0CG29|GST2_HUMAN;sp|P0CG30|GSTT2_HUMAN	6;6;1	6;6;1	6;6;1	3	6	6	6	23	23	23	27.507	244	244;244;240	0	10.946				1503	0	0	0	GSTT1_HUMAN P30711 GST2_HUMAN P0CG29 GSTT2_HUMAN P0CG30	sp|P0CG30|GSTT2_HUMAN Glutathione S-transferase theta-2B OS=Homo sapiens OX=9606 GN=GSTT2B PE=1 SV=1;sp|P0CG29|GST2_HUMAN Glutathione S-transferase theta-2 OS=Homo sapiens OX=9606 GN=GSTT2 PE=1 SV=1	2952 2953 653689	3	2	GSTT1 GSTT2 GSTT2B	GSTT2P	protein-coding	22q11.23	glutathione S-transferase theta 1 ||| Glutathione S-transferase theta-1 ||| glutathione S-transferase theta 2 (gene/pseudogene) ||| Glutathione S-transferase theta-2 ||| glutathione S-transferase theta 2B (gene/pseudogene) ||| glutathione S-transferase theta 2 (gene/pseudogene) ||| Glutathione S-transferase theta-2B	.	14.359	14.0011	14.2456	15.027	14.8196	12.9698	12.4645	13.4416	13.3252	14.284	0.42345	1.20489
sp|O75764|TCEA3_HUMAN	sp|O75764|TCEA3_HUMAN	sp|O75764|TCEA3_HUMAN	__Other	sp|O75764|TCEA3_HUMAN	3	3	3	1	3	3	3	8.9	8.9	8.9	38.971	348	348	0	5.8113				952	0	0	0	TCEA3_HUMAN O75764	sp|O75764|TCEA3_HUMAN Transcription elongation factor A protein 3 OS=Homo sapiens OX=9606 GN=TCEA3 PE=1 SV=2	6920	1	0	TCEA3	TFIIS TFIIS.H	protein-coding	1p36.12	transcription elongation factor A3 ||| Transcription elongation factor A protein 3	.	13.543	12.2809	11.7303	14.2834	12.1168	11.4903	12.0735	11.8401	11.4875	11.9009	-0.385085	2.16805
sp|O43175|SERA_HUMAN	sp|O43175|SERA_HUMAN	sp|O43175|SERA_HUMAN	__Other	sp|O43175|SERA_HUMAN	25	25	25	1	25	25	25	53.3	53.3	53.3	56.65	533	533	0	323.31				582	0	0	0	SERA_HUMAN O43175	sp|O43175|SERA_HUMAN D-3-phosphoglycerate dehydrogenase OS=Homo sapiens OX=9606 GN=PHGDH PE=1 SV=4	26227	1	0	PHGDH	3-PGDH 3PGDH HEL-S-113 NLS NLS1 PDG PGAD PGD PGDH PHGDHD SERA	protein-coding	1p12	phosphoglycerate dehydrogenase ||| D-3-phosphoglycerate dehydrogenase	.	18.3919	18.296	18.3873	18.76	17.9685	19.2339	16.4278	18.5331	17.2564	18.6006	0.241348	0.614091
sp|A2A2Y4|FRMD3_HUMAN	sp|A2A2Y4|FRMD3_HUMAN	sp|A2A2Y4|FRMD3_HUMAN	__Other	sp|A2A2Y4|FRMD3_HUMAN	2	2	2	1	2	2	2	2.5	2.5	2.5	68.771	597	597	0.0075503	1.1748				215	0	0	0	FRMD3_HUMAN A2A2Y4	sp|A2A2Y4|FRMD3_HUMAN FERM domain-containing protein 3 OS=Homo sapiens OX=9606 GN=FRMD3 PE=2 SV=1	257019	1	0	FRMD3	4.1O EPB41L4O EPB41LO P410	protein-coding	9q21.32	FERM domain containing 3 ||| FERM domain-containing protein 3	.	11.3976	11.4093	11.8831	11.0299	12.4779	11.9476	10.4909	10.5103	12.4673	10.3291	0.491115	-0.362122
sp|P61812|TGFB2_HUMAN	sp|P61812|TGFB2_HUMAN	sp|P61812|TGFB2_HUMAN	__Other	sp|P61812|TGFB2_HUMAN	13	13	13	1	13	13	13	34.3	34.3	34.3	47.747	414	414	0	35.689				2811	0	0	0	TGFB2_HUMAN P61812	sp|P61812|TGFB2_HUMAN Transforming growth factor beta-2 proprotein OS=Homo sapiens OX=9606 GN=TGFB2 PE=1 SV=1	7042	1	0	TGFB2	G-TSF LDS4 TGF-beta2	protein-coding	1q41	transforming growth factor beta 2 ||| Transforming growth factor beta-2 proprotein	.	15.3905	16.3685	17.4341	16.3716	16.0086	14.9229	15.077	15.6591	16.1205	17.2161	1.33288	0.270379
sp|Q15035|TRAM2_HUMAN	sp|Q15035|TRAM2_HUMAN	sp|Q15035|TRAM2_HUMAN	__Other	sp|Q15035|TRAM2_HUMAN	3	3	3	1	3	3	3	7.6	7.6	7.6	43.327	370	370	0	6.0852				3662	0	0	0	TRAM2_HUMAN Q15035	sp|Q15035|TRAM2_HUMAN Translocating chain-associated membrane protein 2 OS=Homo sapiens OX=9606 GN=TRAM2 PE=1 SV=1	9697	1	0	TRAM2	---	protein-coding	6p12.2	translocation associated membrane protein 2 ||| Translocating chain-associated membrane protein 2	.	11.8494	12.8028	13.7684	13.0291	13.0398	10.92	11.9952	12.8135	11.9503	13.1798	1.18135	0.442059
sp|Q92478|CLC2B_HUMAN	sp|Q92478|CLC2B_HUMAN	sp|Q92478|CLC2B_HUMAN	__Other	sp|Q92478|CLC2B_HUMAN	2	2	2	1	2	2	2	19.5	19.5	19.5	17.307	149	149	0	5.8267				5665	0	0	0	CLC2B_HUMAN Q92478	sp|Q92478|CLC2B_HUMAN C-type lectin domain family 2 member B OS=Homo sapiens OX=9606 GN=CLEC2B PE=1 SV=2	9976	1	0	CLEC2B	AICL CLECSF2 HP10085 IFNRG1	protein-coding	12p13.31	C-type lectin domain family 2 member B	.	11.7411	12.763	12.8056	12.3199	13.9024	11.6184	11.9065	12.2248	12.2699	14.0934	0.16304	-0.322749
sp|P42765|THIM_HUMAN	sp|P42765|THIM_HUMAN	sp|P42765|THIM_HUMAN	__Other	sp|P42765|THIM_HUMAN	24	24	24	1	24	24	24	79.8	79.8	79.8	41.924	397	397	0	323.31				2282	0	0	0	THIM_HUMAN P42765	sp|P42765|THIM_HUMAN 3-ketoacyl-CoA thiolase, mitochondrial OS=Homo sapiens OX=9606 GN=ACAA2 PE=1 SV=2	10449	1	0	ACAA2	DSAEC	protein-coding	18q21.1	acetyl-CoA acyltransferase 2 ||| 3-ketoacyl-CoA thiolase, mitochondrial	.	17.7918	18.4193	18.5541	17.7192	20.1744	17.5389	18.2047	17.3663	18.0975	17.6221	0.39442	-0.440493
sp|P11413|G6PD_HUMAN	sp|P11413|G6PD_HUMAN	sp|P11413|G6PD_HUMAN	__Other	sp|P11413|G6PD_HUMAN	45	45	45	1	45	45	45	84.7	84.7	84.7	59.256	515	515	0	323.31				1562	0	0	0	G6PD_HUMAN P11413	sp|P11413|G6PD_HUMAN Glucose-6-phosphate 1-dehydrogenase OS=Homo sapiens OX=9606 GN=G6PD PE=1 SV=4	2539	1	0	G6PD	G6PD1	protein-coding	Xq28	glucose-6-phosphate dehydrogenase ||| Glucose-6-phosphate 1-dehydrogenase	.	20.3815	19.9599	19.5553	20.9343	19.9784	20.9173	18.5948	18.9232	19.0371	20.3235	-0.227685	1.15134
sp|O75911|DHRS3_HUMAN	sp|O75911|DHRS3_HUMAN	sp|O75911|DHRS3_HUMAN	__Other	sp|O75911|DHRS3_HUMAN	9	9	9	1	9	9	9	38.7	38.7	38.7	33.548	302	302	0	147.7				978	0	0	0	DHRS3_HUMAN O75911	sp|O75911|DHRS3_HUMAN Short-chain dehydrogenase/reductase 3 OS=Homo sapiens OX=9606 GN=DHRS3 PE=1 SV=2	9249	1	0	DHRS3	DD83.1 RDH17 Rsdr1 SDR1 SDR16C1 retSDR1	protein-coding	1p36.21	dehydrogenase/reductase 3 ||| Short-chain dehydrogenase/reductase 3	.	15.9178	15.7816	14.8713	15.0962	17.0647	16.6845	14.6231	15.2368	16.2517	15.3014	-0.769936	-0.545015
sp|Q8TB45|DPTOR_HUMAN	sp|Q8TB45|DPTOR_HUMAN	sp|Q8TB45|DPTOR_HUMAN	__Other	sp|Q8TB45|DPTOR_HUMAN	2	2	2	1	2	2	2	4.6	4.6	4.6	46.293	409	409	0.0003811	2.6443				5434	0	0	0	DPTOR_HUMAN Q8TB45	sp|Q8TB45|DPTOR_HUMAN DEP domain-containing mTOR-interacting protein OS=Homo sapiens OX=9606 GN=DEPTOR PE=1 SV=2	64798	1	0	DEPTOR	DEP.6 DEPDC6	protein-coding	8q24.12	DEP domain containing MTOR interacting protein ||| DEP domain-containing mTOR-interacting protein	.	12.3067	11.8007	12.9488	10.9968	12.0797	11.0602	10.6313	12.0838	12.5176	10.6186	1.33171	-0.62028
sp|P23229|ITA6_HUMAN	sp|P23229|ITA6_HUMAN	sp|P23229|ITA6_HUMAN	__Other	sp|P23229|ITA6_HUMAN	44	44	44	1	44	44	44	46.3	46.3	46.3	126.6	1130	1130	0	323.31				1867	0	0	0	ITA6_HUMAN P23229	sp|P23229|ITA6_HUMAN Integrin alpha-6 OS=Homo sapiens OX=9606 GN=ITGA6 PE=1 SV=5	3655	1	0	ITGA6	CD49f ITGA6B VLA-6	protein-coding	2q31.1	integrin subunit alpha 6 ||| Integrin alpha-6	.	19.7521	18.877	19.3023	20.0381	18.5127	18.1126	18.0529	19.9145	17.963	17.8655	0.582121	1.3179
sp|P41231|P2RY2_HUMAN	sp|P41231|P2RY2_HUMAN	sp|P41231|P2RY2_HUMAN	__Other	sp|P41231|P2RY2_HUMAN	1	1	1	1	1	1	1	3.4	3.4	3.4	42.273	377	377	0.0028346	1.8433				2249	0	0	0	P2RY2_HUMAN P41231	sp|P41231|P2RY2_HUMAN P2Y purinoceptor 2 OS=Homo sapiens OX=9606 GN=P2RY2 PE=2 SV=4	5029	1	0	P2RY2	HP2U P2RU1 P2U P2U1 P2UR P2Y2 P2Y2R	protein-coding	11q13.4	purinergic receptor P2Y2 ||| P2Y purinoceptor 2	.		8.35279	8.32684	9.56604	8.40219	9.04491	8.24317	10.81	8.26165		-0.623851	0.615352
sp|P02686|MBP_HUMAN	sp|P02686|MBP_HUMAN	sp|P02686|MBP_HUMAN	__Other	sp|P02686|MBP_HUMAN	7	7	7	1	7	7	7	41.1	41.1	41.1	33.117	304	304	0	323.31				1284	0	0	0	MBP_HUMAN P02686	sp|P02686|MBP_HUMAN Myelin basic protein OS=Homo sapiens OX=9606 GN=MBP PE=1 SV=3	4155	1	0	MBP	---	protein-coding	18q23	myelin basic protein	.	15.2235	14.5758	14.9888	15.7595	15.2632	14.1292	12.9421	14.9038	13.987	14.0519	0.485603	1.25633
sp|Q3KNV8|PCGF3_HUMAN	sp|Q3KNV8|PCGF3_HUMAN	sp|Q3KNV8|PCGF3_HUMAN	__Other	sp|Q3KNV8|PCGF3_HUMAN	1	1	1	1	1	1	1	9.1	9.1	9.1	28.115	242	242	0	5.0098				3952	0	0	0	PCGF3_HUMAN Q3KNV8	sp|Q3KNV8|PCGF3_HUMAN Polycomb group RING finger protein 3 OS=Homo sapiens OX=9606 GN=PCGF3 PE=1 SV=1	10336	1	0	PCGF3	DONG1 RNF3 RNF3A	protein-coding	4p16.3	polycomb group ring finger 3 ||| Polycomb group RING finger protein 3	.		8.63731	8.00839	8.39597	6.81317	7.4938	7.9672	9.73409	8.23833	9.03054	-0.201799	0.185783
sp|O14531|DPYL4_HUMAN;sp|Q14117|DPYS_HUMAN;sp|Q14195|DPYL3_HUMAN	sp|Q14195|DPYL3_HUMAN;sp|Q14117|DPYS_HUMAN;sp|O14531|DPYL4_HUMAN	sp|O14531|DPYL4_HUMAN;sp|Q14117|DPYS_HUMAN;sp|Q14195|DPYL3_HUMAN	__Other	sp|Q14195|DPYL3_HUMAN	30;1;1	30;1;1	26;0;1	3	30	30	26	69.5	69.5	60.5	61.963	570	570;519;572	0	323.31				3528	0	0	0	DPYS_HUMAN Q14117 DPYL3_HUMAN Q14195 DPYL4_HUMAN O14531	sp|Q14195|DPYL3_HUMAN Dihydropyrimidinase-related protein 3 OS=Homo sapiens OX=9606 GN=DPYSL3 PE=1 SV=1	1807 1809 10570	3	5	DPYS DPYSL3 DPYSL4	DHP DHPase CRMP-4 CRMP4 DRP-3 DRP3 LCRMP ULIP ULIP-1 CRMP3 DRP-4 ULIP4	protein-coding	8q22.3!5q32!10q26.3	dihydropyrimidinase ||| dihydropyrimidinase like 3 ||| Dihydropyrimidinase-related protein 3 ||| dihydropyrimidinase like 4 ||| Dihydropyrimidinase-related protein 4	.	16.7004	18.3483	18.9963	17.2281	19.4309	17.5176	17.3671	17.1785	18.5094	18.6979	0.880585	-0.887591
sp|Q7Z406|MYH14_HUMAN	sp|Q7Z406|MYH14_HUMAN	sp|Q7Z406|MYH14_HUMAN	__Other	sp|Q7Z406|MYH14_HUMAN	82	67	67	1	82	67	67	42.7	37.1	37.1	227.87	1995	1995	0	306.23				4706	0	0	0	MYH14_HUMAN Q7Z406	sp|Q7Z406|MYH14_HUMAN Myosin-14 OS=Homo sapiens OX=9606 GN=MYH14 PE=1 SV=2	79784	1	0	MYH14	DFNA4 DFNA4A FP17425 MHC16 MYH17 NMHC-II-C PNMHH myosin	protein-coding	19q13.33	myosin heavy chain 14 ||| Myosin-14	.	17.9924	18.3422	17.7381	18.064	17.6902	20.2178	17.9345	18.0941	17.4135	17.5638	-0.351387	-0.0254657
sp|Q9BRK3|MXRA8_HUMAN	sp|Q9BRK3|MXRA8_HUMAN	sp|Q9BRK3|MXRA8_HUMAN	__Other	sp|Q9BRK3|MXRA8_HUMAN	5	5	5	1	5	5	5	13.1	13.1	13.1	49.131	442	442	0	9.2215				6534	0	0	0	MXRA8_HUMAN Q9BRK3	sp|Q9BRK3|MXRA8_HUMAN Matrix remodeling-associated protein 8 OS=Homo sapiens OX=9606 GN=MXRA8 PE=1 SV=1	54587	1	0	MXRA8	ASP3	protein-coding	1p36.33	matrix remodeling associated 8 ||| Matrix remodeling-associated protein 8	.	14.5603	14.5663	16.3996	13.7818	14.0117	13.8174	14.5448	14.1333	13.6916	13.9569	2.10742	-0.510315
sp|P61925|IPKA_HUMAN	sp|P61925|IPKA_HUMAN	sp|P61925|IPKA_HUMAN	__Other	sp|P61925|IPKA_HUMAN	2	2	2	1	2	2	2	23.7	23.7	23.7	7.9884	76	76	0	8.5921				2814	0	0	0	IPKA_HUMAN P61925	sp|P61925|IPKA_HUMAN cAMP-dependent protein kinase inhibitor alpha OS=Homo sapiens OX=9606 GN=PKIA PE=1 SV=2	5569	1	0	PKIA	PRKACN1	protein-coding	8q21.13	cAMP-dependent protein kinase inhibitor alpha	.		10.0824	10.77	8.68853	11.3174	9.65364	9.66471	9.74906	9.23185	10.7964	0.78607	-1.29542
sp|P58335|ANTR2_HUMAN	sp|P58335|ANTR2_HUMAN	sp|P58335|ANTR2_HUMAN	__Other	sp|P58335|ANTR2_HUMAN	9	7	7	1	9	7	7	17.2	14.7	14.7	53.666	489	489	0	29.996				2739	0	0	0	ANTR2_HUMAN P58335	sp|P58335|ANTR2_HUMAN Anthrax toxin receptor 2 OS=Homo sapiens OX=9606 GN=ANTXR2 PE=1 SV=5	118429	1	0	ANTXR2	CMG-2 CMG2 HFS ISH JHF	protein-coding	4q21.21	ANTXR cell adhesion molecule 2 ||| Anthrax toxin receptor 2	.	15.1775	14.9182	14.8569	16.0462	15.3025	13.387	13.6701	15.2156	14.3295	15.1207	0.115869	1.30516
sp|Q9UHI8|ATS1_HUMAN	sp|Q9UHI8|ATS1_HUMAN	sp|Q9UHI8|ATS1_HUMAN	__Other	sp|Q9UHI8|ATS1_HUMAN	10	10	10	1	10	10	10	18.2	18.2	18.2	105.36	967	967	0	72.224				7922	0	0	0	ATS1_HUMAN Q9UHI8	sp|Q9UHI8|ATS1_HUMAN A disintegrin and metalloproteinase with thrombospondin motifs 1 OS=Homo sapiens OX=9606 GN=ADAMTS1 PE=1 SV=4	9510	1	0	ADAMTS1	C3-C5 METH1	protein-coding	21q21.3	ADAM metallopeptidase with thrombospondin type 1 motif 1 ||| A disintegrin and metalloproteinase with thrombospondin motifs 1	.	12.3089	14.2953	15.8676	13.4398	14.5442	13.3289	13.394	13.7915	13.4358	14.5368	1.82529	-0.602529
sp|Q9H6S3|ES8L2_HUMAN	sp|Q9H6S3|ES8L2_HUMAN	sp|Q9H6S3|ES8L2_HUMAN	__Other	sp|Q9H6S3|ES8L2_HUMAN	29	29	29	1	29	29	29	54.3	54.3	54.3	80.62	715	715	0	234.12				7098	0	0	0	ES8L2_HUMAN Q9H6S3	sp|Q9H6S3|ES8L2_HUMAN Epidermal growth factor receptor kinase substrate 8-like protein 2 OS=Homo sapiens OX=9606 GN=EPS8L2 PE=1 SV=2	64787	1	0	EPS8L2	DFNB106 EPS8R2	protein-coding	11p15.5	EPS8 like 2 ||| Epidermal growth factor receptor kinase substrate 8-like protein 2	.	18.459	17.7245	18.3954	18.5894	16.4525	18.4219	16.7053	18.2199	16.8745	17.1165	0.798446	0.992478
sp|Q8NCL4|GALT6_HUMAN	sp|Q8NCL4|GALT6_HUMAN	sp|Q8NCL4|GALT6_HUMAN	__Other	sp|Q8NCL4|GALT6_HUMAN	13	9	9	1	13	9	9	19.5	16.4	16.4	71.158	622	622	0	46.763				5309	0	0	0	GALT6_HUMAN Q8NCL4	sp|Q8NCL4|GALT6_HUMAN Polypeptide N-acetylgalactosaminyltransferase 6 OS=Homo sapiens OX=9606 GN=GALNT6 PE=2 SV=2	11226	1	0	GALNT6	GALNAC-T6 GalNAcT6	protein-coding	12q13.13	polypeptide N-acetylgalactosaminyltransferase 6	.	15.9412	15.0238	14.3547	16.0335	14.0948	14.7828	15.0937	16.3403	14.061	14.2003	-0.515405	1.16334
sp|Q86X29|LSR_HUMAN	sp|Q86X29|LSR_HUMAN	sp|Q86X29|LSR_HUMAN	__Other	sp|Q86X29|LSR_HUMAN	12	12	12	1	12	12	12	24.7	24.7	24.7	71.438	649	649	0	80.255				4874	0	0	0	LSR_HUMAN Q86X29	sp|Q86X29|LSR_HUMAN Lipolysis-stimulated lipoprotein receptor OS=Homo sapiens OX=9606 GN=LSR PE=1 SV=4	51599	1	0	LSR	ILDR3 LISCH7	protein-coding	19q13.12	lipolysis stimulated lipoprotein receptor ||| Lipolysis-stimulated lipoprotein receptor	.	16.6131	16.0345	14.8182	16.7587	14.7373	16.4787	16.0228	16.9643	15.4969	15.0464	-0.97219	0.968238
sp|Q9NYL4|FKB11_HUMAN	sp|Q9NYL4|FKB11_HUMAN	sp|Q9NYL4|FKB11_HUMAN	__Other	sp|Q9NYL4|FKB11_HUMAN	5	5	5	1	5	5	5	23.9	23.9	23.9	22.18	201	201	0	47.857				7652	0	0	0	FKB11_HUMAN Q9NYL4	sp|Q9NYL4|FKB11_HUMAN Peptidyl-prolyl cis-trans isomerase FKBP11 OS=Homo sapiens OX=9606 GN=FKBP11 PE=1 SV=1	51303	1	0	FKBP11	FKBP19	protein-coding	12q13.12	FKBP prolyl isomerase 11 ||| Peptidyl-prolyl cis-trans isomerase FKBP11	.	15.6301	15.8196	15.8244	15.678	16.8197	16.801	15.9622	15.3358	14.3494	14.6909	0.141674	-0.00464279
sp|O75525|KHDR3_HUMAN	sp|O75525|KHDR3_HUMAN	sp|O75525|KHDR3_HUMAN	__Other	sp|O75525|KHDR3_HUMAN	8	5	5	1	8	5	5	17.9	12.7	12.7	38.799	346	346	0	4.8075				913	0	0	0	KHDR3_HUMAN O75525	sp|O75525|KHDR3_HUMAN KH domain-containing, RNA-binding, signal transduction-associated protein 3 OS=Homo sapiens OX=9606 GN=KHDRBS3 PE=1 SV=1	10656	1	0	KHDRBS3	Etle SALP SLM-2 SLM2 T-STAR TSTAR etoile	protein-coding	8q24.23	KH RNA binding domain containing, signal transduction associated 3 ||| KH domain-containing, RNA-binding, signal transduction-associated protein 3	.	14.5546	14.879	14.9704	13.6923	14.8108	14.006	14.9652	16.3127	13.743	15.2976	0.24566	-1.03241
sp|Q0VAQ4|SMAGP_HUMAN	sp|Q0VAQ4|SMAGP_HUMAN	sp|Q0VAQ4|SMAGP_HUMAN	__Other	sp|Q0VAQ4|SMAGP_HUMAN	1	1	1	1	1	1	1	9.3	9.3	9.3	10.679	97	97	0.0094059	1.0161				3229	0	0	0	SMAGP_HUMAN Q0VAQ4	sp|Q0VAQ4|SMAGP_HUMAN Small cell adhesion glycoprotein OS=Homo sapiens OX=9606 GN=SMAGP PE=1 SV=1	57228	1	0	SMAGP	hSMAGP	protein-coding	12q13.13	small cell adhesion glycoprotein	.	12.2965	11.1545	11.3578	12.5286	12.043	11.0342	9.60085	11.8837	10.9366	11.1543	0.040425	1.21118
sp|Q5VT66|MARC1_HUMAN	sp|Q5VT66|MARC1_HUMAN	sp|Q5VT66|MARC1_HUMAN	__Other	sp|Q5VT66|MARC1_HUMAN	7	7	6	1	7	7	6	26.1	26.1	21.7	37.499	337	337	0	39.934				4228	0	0	0	MARC1_HUMAN Q5VT66	sp|Q5VT66|MARC1_HUMAN Mitochondrial amidoxime-reducing component 1 OS=Homo sapiens OX=9606 GN=MARC1 PE=1 SV=1	64757	1	0	MTARC1	MARC1 MOSC1	protein-coding	1q41	mitochondrial amidoxime reducing component 1 ||| Mitochondrial amidoxime-reducing component 1	.	14.803	14.7843	14.2642	14.7638	15.6474	16.1462	14.2866	13.9811	13.579	13.9999	-0.319344	0.180234
sp|P43005|EAA3_HUMAN	sp|P43005|EAA3_HUMAN	sp|P43005|EAA3_HUMAN	__Other	sp|P43005|EAA3_HUMAN	3	3	3	1	3	3	3	8.8	8.8	8.8	57.1	524	524	0	5.913				2291	0	0	0	EAA3_HUMAN P43005	sp|P43005|EAA3_HUMAN Excitatory amino acid transporter 3 OS=Homo sapiens OX=9606 GN=SLC1A1 PE=1 SV=2	6505	1	0	SLC1A1	DCBXA EAAC1 EAAT3 SCZD18	protein-coding	9p24.2	solute carrier family 1 member 1 ||| Excitatory amino acid transporter 3	.	11.7566	12.1686	11.9689	12.2851	11.8599	10.9889	11.4522	13.8083	11.8883	11.0752	0.0530982	0.369249
sp|P51843|NR0B1_HUMAN	sp|P51843|NR0B1_HUMAN	sp|P51843|NR0B1_HUMAN	__Other	sp|P51843|NR0B1_HUMAN	14	14	14	1	14	14	14	41.1	41.1	41.1	51.717	470	470	0	41.859				2549	0	0	0	NR0B1_HUMAN P51843	sp|P51843|NR0B1_HUMAN Nuclear receptor subfamily 0 group B member 1 OS=Homo sapiens OX=9606 GN=NR0B1 PE=1 SV=2	190	1	0	NR0B1	AHC AHCH AHX DAX-1 DAX1 DSS GTD HHG NROB1 SRXY2	protein-coding	Xp21.2	nuclear receptor subfamily 0 group B member 1	.	13.803	14.9555	14.81	14.2064	16.2411	16.0648	14.3495	13.9864	14.1827	14.3154	0.0404801	-0.56314
sp|Q6UX53|MET7B_HUMAN	sp|Q6UX53|MET7B_HUMAN	sp|Q6UX53|MET7B_HUMAN	__Other	sp|Q6UX53|MET7B_HUMAN	8	8	8	1	8	8	8	48	48	48	27.775	244	244	0	40.35				4521	0	0	0	MET7B_HUMAN Q6UX53	sp|Q6UX53|MET7B_HUMAN Methyltransferase-like protein 7B OS=Homo sapiens OX=9606 GN=METTL7B PE=1 SV=2	196410	1	0	METTL7B	ALDI	protein-coding	12q13.2	methyltransferase like 7B ||| Methyltransferase-like protein 7B	.	16.0314	14.6895	13.7252	15.8186	14.8651	13.4406	14.8028	15.0236	13.6912	13.4738	-0.629943	1.46347
sp|Q9UJC3|HOOK1_HUMAN	sp|Q9UJC3|HOOK1_HUMAN	sp|Q9UJC3|HOOK1_HUMAN	__Other	sp|Q9UJC3|HOOK1_HUMAN	14	13	13	1	14	13	13	21	19.8	19.8	84.647	728	728	0	32.695				7981	0	0	0	HOOK1_HUMAN Q9UJC3	sp|Q9UJC3|HOOK1_HUMAN Protein Hook homolog 1 OS=Homo sapiens OX=9606 GN=HOOK1 PE=1 SV=2	51361	1	0	HOOK1	HK1	protein-coding	1p32.1	hook microtubule tethering protein 1 ||| Protein Hook homolog 1	.	16.245	15.4309	14.6794	16.0716	14.5612	16.5408	15.4496	16.2438	14.3846	14.4749	-0.621286	0.770836
sp|Q9NZQ7|PD1L1_HUMAN	sp|Q9NZQ7|PD1L1_HUMAN	sp|Q9NZQ7|PD1L1_HUMAN	__Other	sp|Q9NZQ7|PD1L1_HUMAN	9	9	9	1	9	9	9	30.3	30.3	30.3	33.275	290	290	0	57.016				7706	0	0	0	PD1L1_HUMAN Q9NZQ7	sp|Q9NZQ7|PD1L1_HUMAN Programmed cell death 1 ligand 1 OS=Homo sapiens OX=9606 GN=CD274 PE=1 SV=1	29126	1	0	CD274	B7-H B7H1 PD-L1 PDCD1L1 PDCD1LG1 PDL1 hPD-L1	protein-coding	9p24.1	CD274 molecule ||| Programmed cell death 1 ligand 1	.	16.2147	15.5897	16.5331	16.3096	14.6395	14.3902	14.2237	15.6183	15.0877	15.9345	1.19102	0.967514
sp|P16219|ACADS_HUMAN	sp|P16219|ACADS_HUMAN	sp|P16219|ACADS_HUMAN	__Other	sp|P16219|ACADS_HUMAN	3	3	3	1	3	3	3	20.4	20.4	20.4	44.297	412	412	0	22.534				1692	0	0	0	ACADS_HUMAN P16219	sp|P16219|ACADS_HUMAN Short-chain specific acyl-CoA dehydrogenase, mitochondrial OS=Homo sapiens OX=9606 GN=ACADS PE=1 SV=1	35	1	0	ACADS	ACAD3 SCAD	protein-coding	12q24.31	acyl-CoA dehydrogenase short chain ||| Short-chain specific acyl-CoA dehydrogenase, mitochondrial	.		7.92807	7.05473	9.62503	8.99697	9.53332	8.13751	7.7805	8.19521	8.76606	-1.45644	1.11386
sp|P48307|TFPI2_HUMAN	sp|P48307|TFPI2_HUMAN	sp|P48307|TFPI2_HUMAN	__Other	sp|P48307|TFPI2_HUMAN	7	7	7	1	7	7	7	47.7	47.7	47.7	26.934	235	235	0	45.168				2366	0	0	0	TFPI2_HUMAN P48307	sp|P48307|TFPI2_HUMAN Tissue factor pathway inhibitor 2 OS=Homo sapiens OX=9606 GN=TFPI2 PE=1 SV=1	7980	1	0	TFPI2	PP5 REF1 TFPI-2	protein-coding	7q21.3	tissue factor pathway inhibitor 2	.	13.9806	14.7056	14.3144	13.706	14.6652	14.6325	16.5777	13.9315	14.2357	14.2442	-0.224038	-0.832382
sp|Q3ZCW2|LEGL_HUMAN	sp|Q3ZCW2|LEGL_HUMAN	sp|Q3ZCW2|LEGL_HUMAN	__Other	sp|Q3ZCW2|LEGL_HUMAN	2	2	2	1	2	2	2	14.5	14.5	14.5	18.986	172	172	0	9.4522				3974	0	0	0	LEGL_HUMAN Q3ZCW2	sp|Q3ZCW2|LEGL_HUMAN Galectin-related protein OS=Homo sapiens OX=9606 GN=LGALSL PE=1 SV=2	29094	1	0	LGALSL	GRP HSPC159	protein-coding	2p14	galectin like ||| Galectin-related protein	.		10.4191	10.2921	10.0983	11.8277	11.4927	11.0267	9.8304	9.20944	10.149	-0.198695	-0.39246
sp|Q969G5|CAVN3_HUMAN	sp|Q969G5|CAVN3_HUMAN	sp|Q969G5|CAVN3_HUMAN	__Other	sp|Q969G5|CAVN3_HUMAN	7	7	7	1	7	7	7	27.6	27.6	27.6	27.701	261	261	0	17.62				5822	0	0	0	CAVN3_HUMAN Q969G5	sp|Q969G5|CAVN3_HUMAN Caveolae-associated protein 3 OS=Homo sapiens OX=9606 GN=CAVIN3 PE=1 SV=3	112464	1	0	CAVIN3	HSRBC PRKCDBP SRBC cavin-3	protein-coding	11p15.4	caveolae associated protein 3 ||| Caveolae-associated protein 3	.	14.6817	14.6944	15.8337	15.1308	14.3274	13.6235	13.2891	13.9785	14.2882	15.3266	1.35893	0.656119
sp|Q15582|BGH3_HUMAN	sp|Q15582|BGH3_HUMAN	sp|Q15582|BGH3_HUMAN	__Other	sp|Q15582|BGH3_HUMAN	28	28	28	1	28	28	28	49	49	49	74.68	683	683	0	307.34				3762	0	0	0	BGH3_HUMAN Q15582	sp|Q15582|BGH3_HUMAN Transforming growth factor-beta-induced protein ig-h3 OS=Homo sapiens OX=9606 GN=TGFBI PE=1 SV=1	7045	1	0	TGFBI	BIGH3 CDB1 CDG2 CDGG1 CSD CSD1 CSD2 CSD3 EBMD LCD1	protein-coding	5q31.1	transforming growth factor beta induced ||| Transforming growth factor-beta-induced protein ig-h3	.	17.5248	17.4224	17.0941	17.6522	16.992	16.1781	16.0749	18.8119	17.1074	17.6974	-0.106921	0.451241
sp|P17931|LEG3_HUMAN	sp|P17931|LEG3_HUMAN	sp|P17931|LEG3_HUMAN	__Other	sp|P17931|LEG3_HUMAN	11	11	11	1	11	11	11	39.2	39.2	39.2	26.152	250	250	0	104.49				1745	0	0	0	LEG3_HUMAN P17931	sp|P17931|LEG3_HUMAN Galectin-3 OS=Homo sapiens OX=9606 GN=LGALS3 PE=1 SV=5	3958	1	0	LGALS3	CBP35 GAL3 GALBP GALIG L31 LGALS2 MAC2	protein-coding	14q22.3	galectin 3 ||| Galectin-3	.	17.9394	17.5613	17.6612	18.1236	17.3131	18.739	16.1196	17.9445	16.9701	16.4522	0.245775	0.708232
sp|Q9BS40|LXN_HUMAN	sp|Q9BS40|LXN_HUMAN	sp|Q9BS40|LXN_HUMAN	__Other	sp|Q9BS40|LXN_HUMAN	2	2	2	1	2	2	2	12.6	12.6	12.6	25.75	222	222	0	8.1765				6563	0	0	0	LXN_HUMAN Q9BS40	sp|Q9BS40|LXN_HUMAN Latexin OS=Homo sapiens OX=9606 GN=LXN PE=1 SV=2	56925	1	0	LXN	ECI TCI	protein-coding	3q25.32	latexin	.	12.2731	11.7033	12.1933	11.9442	11.3183	13.3565	10.4461	11.6326	11.2658	12.4614	0.366051	0.116952
sp|Q07973|CP24A_HUMAN	sp|Q07973|CP24A_HUMAN	sp|Q07973|CP24A_HUMAN	__Other	sp|Q07973|CP24A_HUMAN	3	3	3	1	3	3	3	5.8	5.8	5.8	58.875	514	514	0	3.0144				3192	0	0	0	CP24A_HUMAN Q07973	sp|Q07973|CP24A_HUMAN 1,25-dihydroxyvitamin D(3) 24-hydroxylase, mitochondrial OS=Homo sapiens OX=9606 GN=CYP24A1 PE=1 SV=2	1591	1	0	CYP24A1	CP24 CYP24 HCAI HCINF1 P450-CC24	protein-coding	20q13.2	cytochrome P450 family 24 subfamily A member 1 ||| 1,25-dihydroxyvitamin D(3) 24-hydroxylase, mitochondrial	.		10.7513	12.7137	10.3357	10.4939	10.5251	10.0208	10.6426	9.93941	10.3222	2.08949	-0.288509
sp|Q5VT79|AXA81_HUMAN	sp|Q5VT79|AXA81_HUMAN	sp|Q5VT79|AXA81_HUMAN	__Other	sp|Q5VT79|AXA81_HUMAN	11	11	1	1	11	11	1	41.3	41.3	7.6	36.879	327	327	0	46.086				4229	0	0	0	AXA81_HUMAN Q5VT79	sp|Q5VT79|AXA81_HUMAN Annexin A8-like protein 1 OS=Homo sapiens OX=9606 GN=ANXA8L1 PE=2 SV=2	728113	1	0	ANXA8L1	ANXA8 ANXA8L2 VAC-beta bA145E20.2	protein-coding	10q11.22	annexin A8 like 1 ||| Annexin A8-like protein 1	.	13.7759	15.8479	16.8405	14.9169	14.6916	15.7914	14.8684	15.0819	15.8442	16.8835	1.22571	-0.697906
sp|Q5T9L3|WLS_HUMAN	sp|Q5T9L3|WLS_HUMAN	sp|Q5T9L3|WLS_HUMAN	__Other	sp|Q5T9L3|WLS_HUMAN	7	7	7	1	7	7	7	12	12	12	62.253	541	541	0	9.521				4191	0	0	0	WLS_HUMAN Q5T9L3	sp|Q5T9L3|WLS_HUMAN Protein wntless homolog OS=Homo sapiens OX=9606 GN=WLS PE=1 SV=2	79971	1	0	WLS	C1orf139 EVI GPR177 MRP mig-14	protein-coding	1p31.3	Wnt ligand secretion mediator ||| Protein wntless homolog	.	15.8092	15.8026	15.5996	16.57	16.5737	14.2014	14.9359	15.8904	14.6637	15.969	0.0491281	1.01958
sp|P08582|TRFM_HUMAN	sp|P08582|TRFM_HUMAN	sp|P08582|TRFM_HUMAN	__Other	sp|P08582|TRFM_HUMAN	28	28	28	1	28	28	28	53.5	53.5	53.5	80.214	738	738	0	197.3				1445	0	0	0	TRFM_HUMAN P08582	sp|P08582|TRFM_HUMAN Melanotransferrin OS=Homo sapiens OX=9606 GN=MELTF PE=1 SV=2	4241	1	0	MELTF	CD228 MAP97 MFI2 MTF1 MTf	protein-coding	3q29	melanotransferrin	.	17.4911	17.4014	18.8778	17.4353	16.6682	16.286	16.3919	17.0251	18.0144	17.0403	1.66045	0.217904
sp|P10915|HPLN1_HUMAN	sp|P10915|HPLN1_HUMAN	sp|P10915|HPLN1_HUMAN	__Other	sp|P10915|HPLN1_HUMAN	4	4	4	1	4	4	4	16.4	16.4	16.4	40.165	354	354	0	4.4469				1542	0	0	0	HPLN1_HUMAN P10915	sp|P10915|HPLN1_HUMAN Hyaluronan and proteoglycan link protein 1 OS=Homo sapiens OX=9606 GN=HAPLN1 PE=2 SV=2	1404	1	0	HAPLN1	CRT1 CRTL1	protein-coding	5q14.3	hyaluronan and proteoglycan link protein 1	.	15.2187	14.5049	16.133	14.4584	13.7967	13.7281	13.7016	13.8467	13.5501	14.8309	1.87735	0.20274
sp|Q9C002|NMES1_HUMAN	sp|Q9C002|NMES1_HUMAN	sp|Q9C002|NMES1_HUMAN	__Other	sp|Q9C002|NMES1_HUMAN	4	4	4	1	4	4	4	37.3	37.3	37.3	9.6172	83	83	0	15.954				6827	0	0	0	NMES1_HUMAN Q9C002	sp|Q9C002|NMES1_HUMAN Normal mucosa of esophagus-specific gene 1 protein OS=Homo sapiens OX=9606 GN=NMES1 PE=2 SV=1	84419	1	0	C15orf48	FOAP-11 MIR147BHG NMES1	protein-coding	15q21.1	chromosome 15 open reading frame 48 ||| Normal mucosa of esophagus-specific gene 1 protein	.	14.9113	15.4512	14.4993	15.4271	14.8335	15.4543	17.1441	14.8431	14.7484	14.4926	-0.680986	0.246787
sp|Q8N339|MT1M_HUMAN	sp|Q8N339|MT1M_HUMAN	sp|Q8N339|MT1M_HUMAN	__Other	sp|Q8N339|MT1M_HUMAN	4	2	2	1	4	2	2	50.8	29.5	29.5	6.1103	61	61	0.00075453	2.383				5124	0	0	0	MT1M_HUMAN Q8N339	sp|Q8N339|MT1M_HUMAN Metallothionein-1M OS=Homo sapiens OX=9606 GN=MT1M PE=3 SV=2	4499	1	0	MT1M	MT-1M MT-IM MT1 MT1K	protein-coding	16q13	metallothionein 1M ||| Metallothionein-1M	.	12.5373	11.8768	13.3957	12.9253	10.8942	11.5135	11.6302	11.4186	11.2546	11.4031	1.59133	1.12093
sp|Q86UW9|DTX2_HUMAN	sp|Q86UW9|DTX2_HUMAN	sp|Q86UW9|DTX2_HUMAN	__Other	sp|Q86UW9|DTX2_HUMAN	4	4	4	1	4	4	4	11.7	11.7	11.7	67.246	622	622	0	7.8591				4815	0	0	0	DTX2_HUMAN Q86UW9	sp|Q86UW9|DTX2_HUMAN Probable E3 ubiquitin-protein ligase DTX2 OS=Homo sapiens OX=9606 GN=DTX2 PE=1 SV=3	113878	1	0	DTX2	RNF58	protein-coding	7q11.23	deltex E3 ubiquitin ligase 2 ||| Probable E3 ubiquitin-protein ligase DTX2	.	13.2527	12.4894	12.8892	14.2008	11.9493	12.2263	11.3148	11.9939	11.8655	12.3098	0.545502	1.85712
sp|Q8WW22|DNJA4_HUMAN	sp|Q8WW22|DNJA4_HUMAN	sp|Q8WW22|DNJA4_HUMAN	__Other	sp|Q8WW22|DNJA4_HUMAN	6	6	6	1	6	6	6	16.1	16.1	16.1	44.797	397	397	0	8.0013				5617	0	0	0	DNJA4_HUMAN Q8WW22	sp|Q8WW22|DNJA4_HUMAN DnaJ homolog subfamily A member 4 OS=Homo sapiens OX=9606 GN=DNAJA4 PE=1 SV=1	55466	1	0	DNAJA4	MST104 MSTP104 PRO1472	protein-coding	15q25.1	DnaJ heat shock protein family (Hsp40) member A4 ||| DnaJ homolog subfamily A member 4	.	13.7538	14.0511	13.2319	12.9972	14.9463	13.1004	12.7161	14.7512	14.301	14.2709	-0.557457	-0.792154
sp|Q9GZT4|SRR_HUMAN	sp|Q9GZT4|SRR_HUMAN	sp|Q9GZT4|SRR_HUMAN	__Other	sp|Q9GZT4|SRR_HUMAN	2	2	2	1	2	2	2	6.5	6.5	6.5	36.566	340	340	0	3.8278				6875	0	0	0	SRR_HUMAN Q9GZT4	sp|Q9GZT4|SRR_HUMAN Serine racemase OS=Homo sapiens OX=9606 GN=SRR PE=1 SV=1	63826	1	0	SRR	ILV1 ISO1	protein-coding	17p13.3	serine racemase	.	11.943	12.3155	13.8033	11.4141	11.2661	11.3306	12.2704	12.5121	11.8016	11.3972	1.82885	-0.560313
sp|O00204|ST2B1_HUMAN	sp|O00204|ST2B1_HUMAN	sp|O00204|ST2B1_HUMAN	__Other	sp|O00204|ST2B1_HUMAN	4	4	4	1	4	4	4	14.8	14.8	14.8	41.307	365	365	0	8.6747				297	0	0	0	ST2B1_HUMAN O00204	sp|O00204|ST2B1_HUMAN Sulfotransferase 2B1 OS=Homo sapiens OX=9606 GN=SULT2B1 PE=1 SV=2	6820	1	0	SULT2B1	ARCI14 HSST2	protein-coding	19q13.33	sulfotransferase family 2B member 1 ||| Sulfotransferase 2B1	.	12.7351	12.7306	12.2044	12.9487	11.8717	14.2033	11.7469	13.0044	11.6997	12.0069	-0.256309	0.487971
sp|Q8WX94|NALP7_HUMAN;sp|Q9NX02|NALP2_HUMAN	sp|Q9NX02|NALP2_HUMAN;sp|Q8WX94|NALP7_HUMAN	sp|Q8WX94|NALP7_HUMAN;sp|Q9NX02|NALP2_HUMAN	__Other	sp|Q9NX02|NALP2_HUMAN	17;4	17;4	17;4	2	17	17	17	18.2	18.2	18.2	120.51	1062	1062;980	0	34.185				7585	0	0	0	NALP2_HUMAN Q9NX02 NALP7_HUMAN Q8WX94	sp|Q9NX02|NALP2_HUMAN NACHT, LRR and PYD domains-containing protein 2 OS=Homo sapiens OX=9606 GN=NLRP2 PE=1 SV=1	55655 199713	2	2	NLRP2 NLRP7	CLR19.9 NALP2 NBS1 PAN1 PYPAF2 CLR19.4 HYDM NALP7 NOD12 PAN7 PYPAF3	protein-coding	19q13.42	NLR family pyrin domain containing 2 ||| NACHT, LRR and PYD domains-containing protein 2 ||| NLR family pyrin domain containing 7 ||| NACHT, LRR and PYD domains-containing protein 7	.	16.6815	16.1996	15.3465	16.8788	16.3728	15.5772	17.4763	15.1502	15.0836	15.859	-0.621537	0.910718
sp|P32455|GBP1_HUMAN	sp|P32455|GBP1_HUMAN	sp|P32455|GBP1_HUMAN	__Other	sp|P32455|GBP1_HUMAN	25	25	15	1	25	25	15	47.1	47.1	26.9	67.93	592	592	0	83.426				2094	0	0	0	GBP1_HUMAN P32455	sp|P32455|GBP1_HUMAN Guanylate-binding protein 1 OS=Homo sapiens OX=9606 GN=GBP1 PE=1 SV=2	2633	1	0	GBP1	---	protein-coding	1p22.2	guanylate binding protein 1 ||| Guanylate-binding protein 1	.	17.8328	17.5667	18.6478	17.4522	17.3215	16.633	16.1358	17.4367	18.5325	16.9187	1.26304	0.0673938
sp|Q13303|KCAB2_HUMAN	sp|Q13303|KCAB2_HUMAN	sp|Q13303|KCAB2_HUMAN	__Other	sp|Q13303|KCAB2_HUMAN	9	9	8	1	9	9	8	30.2	30.2	28.1	41	367	367	0	70.278				3360	0	0	0	KCAB2_HUMAN Q13303	sp|Q13303|KCAB2_HUMAN Voltage-gated potassium channel subunit beta-2 OS=Homo sapiens OX=9606 GN=KCNAB2 PE=1 SV=2	8514	1	0	KCNAB2	AKR6A5 HKvbeta2 HKvbeta2.1 HKvbeta2.2 KCNA2B KV-BETA-2	protein-coding	1p36.31	potassium voltage-gated channel subfamily A regulatory beta subunit 2 ||| Voltage-gated potassium channel subunit beta-2	.	15.2527	14.7884	14.0365	14.9077	14.4046	14.0652	13.848	14.0381	16.499	14.2749	-0.472782	0.398468
sp|P78410|BT3A2_HUMAN	sp|P78410|BT3A2_HUMAN	sp|P78410|BT3A2_HUMAN	__Other	sp|P78410|BT3A2_HUMAN	5	2	2	1	5	2	2	21.9	11.4	11.4	36.427	334	334	0	3.5131				2959	0	0	0	BT3A2_HUMAN P78410	sp|P78410|BT3A2_HUMAN Butyrophilin subfamily 3 member A2 OS=Homo sapiens OX=9606 GN=BTN3A2 PE=1 SV=2	11118	1	0	BTN3A2	BT3.2 BTF4 BTN3.2 CD277	protein-coding	6p22.2	butyrophilin subfamily 3 member A2	.		10.4143	11.0423	10.0986	10.8204	9.13185	8.71384	10.8624	10.6722	10.5878	0.801165	-0.142557
sp|P05161|ISG15_HUMAN	sp|P05161|ISG15_HUMAN	sp|P05161|ISG15_HUMAN	__Other	sp|P05161|ISG15_HUMAN	3	3	3	1	3	3	3	13.9	13.9	13.9	17.887	165	165	0	4.5701				1349	0	0	0	ISG15_HUMAN P05161	sp|P05161|ISG15_HUMAN Ubiquitin-like protein ISG15 OS=Homo sapiens OX=9606 GN=ISG15 PE=1 SV=5	9636	1	0	ISG15	G1P2 IFI15 IMD38 IP17 UCRP hUCRP	protein-coding	1p36.33	ISG15 ubiquitin like modifier ||| Ubiquitin-like protein ISG15	.	15.3195	14.2696	14.9557	14.742	13.8894	13.3027	13.2833	15.5484	14.5257	13.3524	0.755792	0.541998
sp|O14495|PLPP3_HUMAN	sp|O14495|PLPP3_HUMAN	sp|O14495|PLPP3_HUMAN	__Other	sp|O14495|PLPP3_HUMAN	5	5	5	1	5	5	5	21.9	21.9	21.9	35.116	311	311	0	14.171				380	0	0	0	PLPP3_HUMAN O14495	sp|O14495|PLPP3_HUMAN Phospholipid phosphatase 3 OS=Homo sapiens OX=9606 GN=PLPP3 PE=1 SV=1	8613	1	0	PLPP3	Dri42 LPP3 PAP2B PPAP2B VCIP	protein-coding	1p32.2	phospholipid phosphatase 3	.	15.6001	14.6402	15.2235	15.7974	14.0388	14.0621	13.6202	14.7205	15.4113	13.5095	0.675619	1.24947
sp|P50135|HNMT_HUMAN	sp|P50135|HNMT_HUMAN	sp|P50135|HNMT_HUMAN	__Other	sp|P50135|HNMT_HUMAN	6	6	6	1	6	6	6	28.4	28.4	28.4	33.295	292	292	0	19.052				2466	0	0	0	HNMT_HUMAN P50135	sp|P50135|HNMT_HUMAN Histamine N-methyltransferase OS=Homo sapiens OX=9606 GN=HNMT PE=1 SV=1	3176	1	0	HNMT	HMT HNMT-S1 HNMT-S2 MRT51	protein-coding	2q22.1	histamine N-methyltransferase	.	15.1014	14.9084	15.6108	15.5522	14.5424	14.8108	12.9589	15.1513	14.2418	14.2337	0.973093	0.914483
sp|P52209|6PGD_HUMAN	sp|P52209|6PGD_HUMAN	sp|P52209|6PGD_HUMAN	__Other	sp|P52209|6PGD_HUMAN	30	30	30	1	30	30	30	67.7	67.7	67.7	53.139	483	483	0	323.31				2558	0	0	0	6PGD_HUMAN P52209	sp|P52209|6PGD_HUMAN 6-phosphogluconate dehydrogenase, decarboxylating OS=Homo sapiens OX=9606 GN=PGD PE=1 SV=3	5226	1	0	PGD	6PGD	protein-coding	1p36.22	phosphogluconate dehydrogenase ||| 6-phosphogluconate dehydrogenase, decarboxylating	.	19.202	19.3769	18.4623	19.309	19.0929	20.6377	18.0194	18.3924	19.9227	19.391	-0.691086	0.155585
sp|O75923|DYSF_HUMAN	sp|O75923|DYSF_HUMAN	sp|O75923|DYSF_HUMAN	__Other	sp|O75923|DYSF_HUMAN	47	45	45	1	47	45	45	30	28.9	28.9	237.29	2080	2080	0	206.8				980	0	0	0	DYSF_HUMAN O75923	sp|O75923|DYSF_HUMAN Dysferlin OS=Homo sapiens OX=9606 GN=DYSF PE=1 SV=1	8291	1	0	DYSF	FER1L1 LGMD2B LGMDR2 MMD1	protein-coding	2p13.2	dysferlin	.	17.549	17.3095	18.6863	17.5386	16.6351	16.7148	16.3283	18.0593	16.342	16.8408	1.54314	0.395491
sp|Q6P179|ERAP2_HUMAN	sp|Q6P179|ERAP2_HUMAN	sp|Q6P179|ERAP2_HUMAN	__Other	sp|Q6P179|ERAP2_HUMAN	30	30	30	1	30	30	30	33	33	33	110.46	960	960	0	88.438				4401	0	0	0	ERAP2_HUMAN Q6P179	sp|Q6P179|ERAP2_HUMAN Endoplasmic reticulum aminopeptidase 2 OS=Homo sapiens OX=9606 GN=ERAP2 PE=1 SV=2	64167	1	0	ERAP2	L-RAP LRAP	protein-coding	5q15	endoplasmic reticulum aminopeptidase 2	.	16.7866	17.4675	18.579	16.5645	16.4698	16.9126	16.434	16.736	18.1643	17.9518	1.35253	-0.662001
sp|Q8WTV0|SCRB1_HUMAN	sp|Q8WTV0|SCRB1_HUMAN	sp|Q8WTV0|SCRB1_HUMAN	__Other	sp|Q8WTV0|SCRB1_HUMAN	5	5	5	1	5	5	5	9.1	9.1	9.1	60.877	552	552	0	17.142				5542	0	0	0	SCRB1_HUMAN Q8WTV0	sp|Q8WTV0|SCRB1_HUMAN Scavenger receptor class B member 1 OS=Homo sapiens OX=9606 GN=SCARB1 PE=1 SV=1	949	1	0	SCARB1	CD36L1 CLA-1 CLA1 HDLQTL6 SR-BI SRB1	protein-coding	12q24.31	scavenger receptor class B member 1	.	15.8059	16.2619	15.3228	15.0214	17.4123	16.7936	16.0923	15.1435	16.491	15.5878	-0.660304	-0.96166
sp|P09471|GNAO_HUMAN	sp|P09471|GNAO_HUMAN	sp|P09471|GNAO_HUMAN	__Other	sp|P09471|GNAO_HUMAN	5	3	3	1	5	3	3	18.4	11.9	11.9	40.05	354	354	0	4.4501				1470	0	0	0	GNAO_HUMAN P09471	sp|P09471|GNAO_HUMAN Guanine nucleotide-binding protein G(o) subunit alpha OS=Homo sapiens OX=9606 GN=GNAO1 PE=1 SV=4	2775	1	0	GNAO1	EIEE17 G-ALPHA-o GNAO HLA-DQB1 NEDIM	protein-coding	16q13	G-protein subunit alpha o1 ||| Guanine nucleotide-binding protein G(o) subunit alpha	.	13.4489	13.6482	13.0433	13.0417	13.232	13.7723	15.4016	13.0331	12.9058	12.7863	-0.358679	-0.360293
sp|P56539|CAV3_HUMAN;sp|Q03135|CAV1_HUMAN	sp|Q03135|CAV1_HUMAN;sp|P56539|CAV3_HUMAN	sp|P56539|CAV3_HUMAN;sp|Q03135|CAV1_HUMAN	__Other	sp|Q03135|CAV1_HUMAN	10;1	10;1	10;1	2	10	10	10	62.4	62.4	62.4	20.471	178	178;151	0	260.57				3113	0	0	0	CAV1_HUMAN Q03135 CAV3_HUMAN P56539	sp|Q03135|CAV1_HUMAN Caveolin-1 OS=Homo sapiens OX=9606 GN=CAV1 PE=1 SV=4	857 859	2	5	CAV1 CAV3	BSCL3 CGL3 LCCNS MSTP085 PPH3 VIP21 LGMD1C LQT9 MPDT RMD2 VIP-21	protein-coding	7q31.2!3p25.3	caveolin 1 ||| Caveolin-1 ||| caveolin 3 ||| Caveolin-3	.	17.9682	17.3208	18.4096	18.3856	17.3471	15.9347	16.6734	16.9624	16.6394	17.3713	1.19417	1.1702
sp|Q5T7M9|DIK1A_HUMAN	sp|Q5T7M9|DIK1A_HUMAN	sp|Q5T7M9|DIK1A_HUMAN	__Other	sp|Q5T7M9|DIK1A_HUMAN	2	2	2	1	2	2	2	5.6	5.6	5.6	49.024	428	428	0	7.8555				4183	0	0	0	DIK1A_HUMAN Q5T7M9	sp|Q5T7M9|DIK1A_HUMAN Divergent protein kinase domain 1A OS=Homo sapiens OX=9606 GN=DIPK1A PE=2 SV=1	388650	1	0	DIPK1A	FAM69A	protein-coding	1p22.1	divergent protein kinase domain 1A	.		11.9746	12.3176	10.715	13.1074	11.7755	10.7193	11.9491	12.4821	11.2054	0.533635	-1.06895
sp|Q16566|KCC4_HUMAN	sp|Q16566|KCC4_HUMAN	sp|Q16566|KCC4_HUMAN	__Other	sp|Q16566|KCC4_HUMAN	4	3	3	1	4	3	3	11.4	9.7	9.7	51.925	473	473	0.0098633	0.98268				3849	0	0	0	KCC4_HUMAN Q16566	sp|Q16566|KCC4_HUMAN Calcium/calmodulin-dependent protein kinase type IV OS=Homo sapiens OX=9606 GN=CAMK4 PE=1 SV=1	814	1	0	CAMK4	CaMK-IV CaMK-GR CaMKIV caMK	protein-coding	5q22.1	calcium/calmodulin dependent protein kinase IV ||| Calcium/calmodulin-dependent protein kinase type IV	.		11.7883	12.6462	10.5078	10.9496	10.8557	11.9101	11.5101	10.3925	12.4074	1.24875	-0.889637
sp|P25116|PAR1_HUMAN	sp|P25116|PAR1_HUMAN	sp|P25116|PAR1_HUMAN	__Other	sp|P25116|PAR1_HUMAN	1	1	1	1	1	1	1	4.2	4.2	4.2	47.44	425	425	0	17.453				1910	0	0	0	PAR1_HUMAN P25116	sp|P25116|PAR1_HUMAN Proteinase-activated receptor 1 OS=Homo sapiens OX=9606 GN=F2R PE=1 SV=2	2149	1	0	F2R	CF2R HTR PAR-1 PAR1 TR	protein-coding	5q13.3	coagulation factor II thrombin receptor ||| Proteinase-activated receptor 1	.		10.9043	11.245	11.3019	11.8645	9.94153	10.3175	10.0254	9.97861	11.9529	0.416623	0.473438
sp|P26022|PTX3_HUMAN	sp|P26022|PTX3_HUMAN	sp|P26022|PTX3_HUMAN	__Other	sp|P26022|PTX3_HUMAN	3	3	3	1	3	3	3	11.5	11.5	11.5	41.975	381	381	0	6.8232				1928	0	0	0	PTX3_HUMAN P26022	sp|P26022|PTX3_HUMAN Pentraxin-related protein PTX3 OS=Homo sapiens OX=9606 GN=PTX3 PE=1 SV=3	5806	1	0	PTX3	TNFAIP5 TSG-14	protein-coding	3q25.32	pentraxin 3 ||| Pentraxin-related protein PTX3	.	11.5321	11.4076	11.97	10.0273	11.4431	10.3676	10.8169	10.7614	11.4774	12.6153	0.785155	-1.15758
sp|Q96SI1|KCD15_HUMAN;REV__sp|Q14999|CUL7_HUMAN	sp|Q96SI1|KCD15_HUMAN;REV__sp|Q14999|CUL7_HUMAN	sp|Q96SI1|KCD15_HUMAN;REV__sp|Q14999|CUL7_HUMAN	__REV	sp|Q96SI1|KCD15_HUMAN	5;1	5;1	5;1	2	5	5	5	16.3	16.3	16.3	31.942	283	283;1698	0	9.2748				6354	0	0	0	CUL7_HUMAN Q14999 KCD15_HUMAN Q96SI1	sp|Q96SI1|KCD15_HUMAN BTB/POZ domain-containing protein KCTD15 OS=Homo sapiens OX=9606 GN=KCTD15 PE=1 SV=1	9820 79047	2	5	CUL7 KCTD15	3M1 CUL-7 KIAA0076 dJ20C7.5	protein-coding	6p21.1!19q13.11	cullin 7 ||| Cullin-7 ||| potassium channel tetramerization domain containing 15 ||| BTB/POZ domain-containing protein KCTD15	.	13.4094	13.7241	12.3146	13.0413	13.8619	14.2346	13.439	12.2492	14.4473	14.1233	-1.14933	-0.422622
sp|P29350|PTN6_HUMAN	sp|P29350|PTN6_HUMAN	sp|P29350|PTN6_HUMAN	__Other	sp|P29350|PTN6_HUMAN	12	12	12	1	12	12	12	22	22	22	67.56	595	595	0	52.112				1998	0	0	0	PTN6_HUMAN P29350	sp|P29350|PTN6_HUMAN Tyrosine-protein phosphatase non-receptor type 6 OS=Homo sapiens OX=9606 GN=PTPN6 PE=1 SV=1	5777	1	0	PTPN6	HCP HCPH HPTP1C PTP-1C SH-PTP1 SHP-1 SHP-1L SHP1	protein-coding	12p13.31	protein tyrosine phosphatase non-receptor type 6 ||| Tyrosine-protein phosphatase non-receptor type 6	.	15.1448	14.3763	14.4822	14.8938	12.885	14.7505	15.2156	14.543	13.7428	13.12	0.278055	0.689712
sp|Q86TC9|MYPN_HUMAN	sp|Q86TC9|MYPN_HUMAN	sp|Q86TC9|MYPN_HUMAN	__Other	sp|Q86TC9|MYPN_HUMAN	6	5	5	1	6	5	5	4.4	3.6	3.6	145.26	1320	1320	0.0028381	1.871				4781	0	0	0	MYPN_HUMAN Q86TC9	sp|Q86TC9|MYPN_HUMAN Myopalladin OS=Homo sapiens OX=9606 GN=MYPN PE=1 SV=2	84665	1	0	MYPN	CMD1DD CMH22 MYOP NEM11 RCM4	protein-coding	10q21.3	myopalladin	.	12.8029	13.016	12.2024	11.9926	13.5748	12.1821	14.2643	11.9201	13.2291	12.5777	-0.540505	-0.750309
sp|Q99584|S10AD_HUMAN	sp|Q99584|S10AD_HUMAN	sp|Q99584|S10AD_HUMAN	__Other	sp|Q99584|S10AD_HUMAN	6	6	6	1	6	6	6	42.9	42.9	42.9	11.471	98	98	0	31.227				6410	0	0	0	S10AD_HUMAN Q99584	sp|Q99584|S10AD_HUMAN Protein S100-A13 OS=Homo sapiens OX=9606 GN=S100A13 PE=1 SV=1	6284	1	0	S100A13	---	protein-coding	1q21.3	S100 calcium binding protein A13 ||| Protein S100-A13	.	16.9197	16.9622	16.8881	17.2745	16.96	17.3465	14.9108	17.6335	17.3302	16.5809	0.0224916	0.408933
sp|Q7L311|ARMX2_HUMAN	sp|Q7L311|ARMX2_HUMAN	sp|Q7L311|ARMX2_HUMAN	__Other	sp|Q7L311|ARMX2_HUMAN	8	8	8	1	8	8	8	29.7	29.7	29.7	65.683	632	632	0	153.86				4644	0	0	0	ARMX2_HUMAN Q7L311	sp|Q7L311|ARMX2_HUMAN Armadillo repeat-containing X-linked protein 2 OS=Homo sapiens OX=9606 GN=ARMCX2 PE=2 SV=1	9823	1	0	ARMCX2	ALEX2 GASP9	protein-coding	Xq22.1	armadillo repeat containing X-linked 2 ||| Armadillo repeat-containing X-linked protein 2	.	13.2845	13.3185	14.462	13.071	12.4237	12.1258	13.7919	12.6894	11.972	13.3013	1.48238	0.0913371
sp|P27701|CD82_HUMAN	sp|P27701|CD82_HUMAN	sp|P27701|CD82_HUMAN	__Other	sp|P27701|CD82_HUMAN	4	4	4	1	4	4	4	15	15	15	29.625	267	267	0	16.675				1958	0	0	0	CD82_HUMAN P27701	sp|P27701|CD82_HUMAN CD82 antigen OS=Homo sapiens OX=9606 GN=CD82 PE=1 SV=1	3732	1	0	CD82	4F9 C33 GR15 IA4 KAI1 R2 SAR2 ST6 TSPAN27	protein-coding	11p11.2	CD82 molecule ||| CD82 antigen	.		12.7044	12.9068	11.8017	12.0201	12.0093	11.864	11.712	12.5273	14.2469	0.520749	-0.584336
sp|Q9BZQ8|NIBA1_HUMAN	sp|Q9BZQ8|NIBA1_HUMAN	sp|Q9BZQ8|NIBA1_HUMAN	__Other	sp|Q9BZQ8|NIBA1_HUMAN	24	24	24	1	24	24	24	28.2	28.2	28.2	103.13	928	928	0	105.55				6822	0	0	0	NIBA1_HUMAN Q9BZQ8	sp|Q9BZQ8|NIBA1_HUMAN Protein Niban 1 OS=Homo sapiens OX=9606 GN=NIBAN1 PE=1 SV=1	116496	1	0	NIBAN1	C1orf24 FAM129A GIG39 NIBAN	protein-coding	1q25.3	niban apoptosis regulator 1 ||| Protein Niban 1	.	17.2252	17.1744	18.6218	16.8587	17.7319	16.1451	16.2582	16.6055	16.3009	17.0803	1.67153	-0.0915644
sp|P55899|FCGRN_HUMAN	sp|P55899|FCGRN_HUMAN	sp|P55899|FCGRN_HUMAN	__Other	sp|P55899|FCGRN_HUMAN	2	2	2	1	2	2	2	5.8	5.8	5.8	39.743	365	365	0	2.9922				2697	0	0	0	FCGRN_HUMAN P55899	sp|P55899|FCGRN_HUMAN IgG receptor FcRn large subunit p51 OS=Homo sapiens OX=9606 GN=FCGRT PE=1 SV=1	2217	1	0	FCGRT	FCRN alpha-chain	protein-coding	19q13.33	Fc fragment of IgG receptor and transporter ||| IgG receptor FcRn large subunit p51	.		12.5001	13.4238	11.4252	11.8194	11.018	12.6771	12.6252	11.1191	12.3806	1.36277	-0.635865
sp|P57735|RAB25_HUMAN	sp|P57735|RAB25_HUMAN	sp|P57735|RAB25_HUMAN	__Other	sp|P57735|RAB25_HUMAN	8	7	7	1	8	7	7	38.5	34.7	34.7	23.495	213	213	0	69.154				2732	0	0	0	RAB25_HUMAN P57735	sp|P57735|RAB25_HUMAN Ras-related protein Rab-25 OS=Homo sapiens OX=9606 GN=RAB25 PE=1 SV=2	57111	1	0	RAB25	CATX-8 RAB11C	protein-coding	1q22	RAB25, member RAS oncogene family ||| Ras-related protein Rab-25	.	16.3616	15.8617	15.0542	16.4063	14.7198	16.242	15.3281	17.2685	15.4336	15.2102	-0.653672	0.698469
sp|Q13011|ECH1_HUMAN	sp|Q13011|ECH1_HUMAN	sp|Q13011|ECH1_HUMAN	__Other	sp|Q13011|ECH1_HUMAN	17	17	17	1	17	17	17	73.8	73.8	73.8	35.816	328	328	0	276.89				3302	0	0	0	ECH1_HUMAN Q13011	sp|Q13011|ECH1_HUMAN Delta(3,5)-Delta(2,4)-dienoyl-CoA isomerase, mitochondrial OS=Homo sapiens OX=9606 GN=ECH1 PE=1 SV=2	1891	1	0	ECH1	HPXEL	protein-coding	19q13.2	enoyl-CoA hydratase 1 ||| Delta(3,5)-Delta(2,4)-dienoyl-CoA isomerase, mitochondrial	.	17.6818	18.0337	17.4385	17.7576	18.8546	18.7678	18.5684	16.3333	18.1011	17.411	-0.465523	-0.146432
sp|Q9H008|LHPP_HUMAN	sp|Q9H008|LHPP_HUMAN	sp|Q9H008|LHPP_HUMAN	__Other	sp|Q9H008|LHPP_HUMAN	5	5	5	1	5	5	5	34.4	34.4	34.4	29.165	270	270	0	32.822				6889	0	0	0	LHPP_HUMAN Q9H008	sp|Q9H008|LHPP_HUMAN Phospholysine phosphohistidine inorganic pyrophosphate phosphatase OS=Homo sapiens OX=9606 GN=LHPP PE=1 SV=2	64077	1	0	LHPP	HDHD2B	protein-coding	10q26.13	phospholysine phosphohistidine inorganic pyrophosphate phosphatase	.	14.5938	14.0604	14.9566	15.0292	12.8384	13.8312	14.4657	14.4185	13.2719	13.1035	0.967197	1.03982
sp|P63162|RSMN_HUMAN	sp|P63162|RSMN_HUMAN	sp|P63162|RSMN_HUMAN	__Other	sp|P63162|RSMN_HUMAN	11	1	0	1	11	1	0	31.7	2.9	0	24.614	240	240	1	-2	+			2908	0	0	0	RSMN_HUMAN P63162	sp|P63162|RSMN_HUMAN Small nuclear ribonucleoprotein-associated protein N OS=Homo sapiens OX=9606 GN=SNRPN PE=1 SV=1	8926 6638	2	2	SNURF SNRPN	HCERN3 PWCR RT-LI SM-D SMN SNRNP-N SNURF-SNRPN sm-N	protein-coding	15q11.2	SNRPN upstream reading frame ||| small nuclear ribonucleoprotein polypeptide N ||| Small nuclear ribonucleoprotein-associated protein N	.	11.4544	11.9595	12.1661	13.0424	12.3368	10.5206	11.5218	12.8329	11.6139	11.1859	0.263538	1.13986
sp|O94955|RHBT3_HUMAN	sp|O94955|RHBT3_HUMAN	sp|O94955|RHBT3_HUMAN	__Other	sp|O94955|RHBT3_HUMAN	7	7	7	1	7	7	7	15.9	15.9	15.9	69.413	611	611	0	16.781				1064	0	0	0	RHBT3_HUMAN O94955	sp|O94955|RHBT3_HUMAN Rho-related BTB domain-containing protein 3 OS=Homo sapiens OX=9606 GN=RHOBTB3 PE=1 SV=2	22836	1	0	RHOBTB3	---	protein-coding	5q15	Rho related BTB domain containing 3 ||| Rho-related BTB domain-containing protein 3	.	15.3718	15.202	16.48	15.7238	15.1563	14.9898	13.5631	15.5095	14.7455	14.7694	1.36278	0.606585
sp|P06239|LCK_HUMAN	sp|P06239|LCK_HUMAN	sp|P06239|LCK_HUMAN	__Other	sp|P06239|LCK_HUMAN	4	2	2	1	4	2	2	9.8	6.3	6.3	58	509	509	0	8.7579				1369	0	0	0	LCK_HUMAN P06239	sp|P06239|LCK_HUMAN Tyrosine-protein kinase Lck OS=Homo sapiens OX=9606 GN=LCK PE=1 SV=6	3932	1	0	LCK	IMD22 LSK YT16 p56lck pp58lck	protein-coding	1p35.2	LCK proto-oncogene, Src family tyrosine kinase ||| Tyrosine-protein kinase Lck	.	12.8304	11.6919	11.2309	13.0586	11.2382	11.1464	10.9946	12.8618	11.1189	11.0774	-0.35994	1.46772
sp|P78504|JAG1_HUMAN	sp|P78504|JAG1_HUMAN	sp|P78504|JAG1_HUMAN	__Other	sp|P78504|JAG1_HUMAN	17	17	16	1	17	17	16	19.7	19.7	18.6	133.8	1218	1218	0	66.292				2961	0	0	0	JAG1_HUMAN P78504	sp|P78504|JAG1_HUMAN Protein jagged-1 OS=Homo sapiens OX=9606 GN=JAG1 PE=1 SV=3	182	1	0	JAG1	AGS AGS1 AHD AWS CD339 DCHE HJ1 JAGL1	protein-coding	20p12.2	jagged canonical Notch ligand 1 ||| Protein jagged-1	.	15.6904	15.9607	15.7554	15.3591	14.794	15.4107	15.5448	17.6306	15.3202	16.0883	0.0175409	-0.378819
sp|Q99674|CGRE1_HUMAN	sp|Q99674|CGRE1_HUMAN	sp|Q99674|CGRE1_HUMAN	__Other	sp|Q99674|CGRE1_HUMAN	8	8	8	1	8	8	8	39.9	39.9	39.9	33.456	318	318	0	23.296				6431	0	0	0	CGRE1_HUMAN Q99674	sp|Q99674|CGRE1_HUMAN Cell growth regulator with EF hand domain protein 1 OS=Homo sapiens OX=9606 GN=CGREF1 PE=2 SV=3	10669	1	0	CGREF1	CGR11	protein-coding	2p23.3	cell growth regulator with EF-hand domain 1 ||| Cell growth regulator with EF hand domain protein 1	.		13.6193	13.0843	12.6221	15.0015	13.8585	13.5825	12.3702	14.0106	13.0489	-0.363005	-0.82525
sp|O95857|TSN13_HUMAN	sp|O95857|TSN13_HUMAN	sp|O95857|TSN13_HUMAN	__Other	sp|O95857|TSN13_HUMAN	5	5	2	1	5	5	2	22.5	22.5	14.2	22.147	204	204	0	12.336				1206	0	0	0	TSN13_HUMAN O95857	sp|O95857|TSN13_HUMAN Tetraspanin-13 OS=Homo sapiens OX=9606 GN=TSPAN13 PE=2 SV=1	27075	1	0	TSPAN13	NET-6 NET6 TM4SF13	protein-coding	7p21.1	tetraspanin 13 ||| Tetraspanin-13	.	14.3976	14.7202	13.8756	14.9133	14.9449	15.7417	13.4757	15.0036	15.1322	13.4686	-0.693837	0.343861
sp|P31146|COR1A_HUMAN	sp|P31146|COR1A_HUMAN	sp|P31146|COR1A_HUMAN	__Other	sp|P31146|COR1A_HUMAN	17	16	16	1	17	16	16	43.4	41.9	41.9	51.026	461	461	0	70.153				2063	0	0	0	COR1A_HUMAN P31146	sp|P31146|COR1A_HUMAN Coronin-1A OS=Homo sapiens OX=9606 GN=CORO1A PE=1 SV=4	11151	1	0	CORO1A	CLABP CLIPINA HCORO1 IMD8 TACO p57	protein-coding	16p11.2	coronin 1A ||| Coronin-1A	.	16.5381	16.6451	16.1078	16.1907	16.0092	15.9594	16.9585	18.3657	15.8533	16.1024	-0.335537	-0.252636
sp|P16070|CD44_HUMAN	sp|P16070|CD44_HUMAN	sp|P16070|CD44_HUMAN	__Other	sp|P16070|CD44_HUMAN	13	13	13	1	13	13	13	16.4	16.4	16.4	81.537	742	742	0	323.31				1686	0	0	0	CD44_HUMAN P16070	sp|P16070|CD44_HUMAN CD44 antigen OS=Homo sapiens OX=9606 GN=CD44 PE=1 SV=3	960	1	0	CD44	CDW44 CSPG8 ECMR-III HCELL HUTCH-I IN LHR MC56 MDU2 MDU3 MIC4 Pgp1	protein-coding	11p13	CD44 molecule (Indian blood group) ||| CD44 antigen	.	17.7858	18.654	18.8955	18.9049	18.7189	17.6512	17.2735	17.6845	18.2127	19.8255	0.499649	0.509076
sp|P51911|CNN1_HUMAN;sp|Q15417|CNN3_HUMAN	sp|Q15417|CNN3_HUMAN;sp|P51911|CNN1_HUMAN	sp|P51911|CNN1_HUMAN;sp|Q15417|CNN3_HUMAN	__Other	sp|Q15417|CNN3_HUMAN	16;1	15;1	15;1	2	16	15	15	67.8	64.4	64.4	36.413	329	329;297	0	221				3734	0	0	0	CNN1_HUMAN P51911 CNN3_HUMAN Q15417	sp|Q15417|CNN3_HUMAN Calponin-3 OS=Homo sapiens OX=9606 GN=CNN3 PE=1 SV=1	1264 1266	2	5	CNN1 CNN3	HEL-S-14 SMCC Sm-Calp	protein-coding	19p13.2!1p21.3	calponin 1 ||| Calponin-1 ||| calponin 3 ||| Calponin-3	.	16.5915	17.8824	19.042	17.2316	17.5035	16.3402	16.8745	17.6351	18.1125	18.241	1.41941	-0.390913
sp|O95980|RECK_HUMAN	sp|O95980|RECK_HUMAN	sp|O95980|RECK_HUMAN	__Other	sp|O95980|RECK_HUMAN	1	1	1	1	1	1	1	1.2	1.2	1.2	106.46	971	971	0.0024783	1.9719				1217	0	0	0	RECK_HUMAN O95980	sp|O95980|RECK_HUMAN Reversion-inducing cysteine-rich protein with Kazal motifs OS=Homo sapiens OX=9606 GN=RECK PE=1 SV=1	8434	1	0	RECK	ST15	protein-coding	9p13.3	reversion inducing cysteine rich protein with kazal motifs ||| Reversion-inducing cysteine-rich protein with Kazal motifs	.		8.00546	7.94875		6.42006		9.52068			7.83372	0.0179513	NA
sp|P0DMM9|ST1A3_HUMAN;sp|P0DMN0|ST1A4_HUMAN	sp|P0DMN0|ST1A4_HUMAN;sp|P0DMM9|ST1A3_HUMAN	sp|P0DMM9|ST1A3_HUMAN;sp|P0DMN0|ST1A4_HUMAN	__Other	sp|P0DMM9|ST1A3_HUMAN;sp|P0DMN0|ST1A4_HUMAN	7;7	7;7	3;3	2	7	7	3	33.6	33.6	20.7	34.196	295	295;295	0	31.106				1507	0	0	0	ST1A4_HUMAN P0DMN0 ST1A3_HUMAN P0DMM9	sp|P0DMN0|ST1A4_HUMAN Sulfotransferase 1A4 OS=Homo sapiens OX=9606 GN=SULT1A4 PE=1 SV=1;sp|P0DMM9|ST1A3_HUMAN Sulfotransferase 1A3 OS=Homo sapiens OX=9606 GN=SULT1A3 PE=1 SV=1	6818 445329 100526830	2	2	SULT1A3 SULT1A4 SLX1A-SULT1A3	HAST HAST3 M-PST ST1A3 ST1A3/ST1A4 ST1A4 ST1A5 STM TL-PST SULT1A3	protein-coding|ncRNA	16p11.2	sulfotransferase family 1A member 3 ||| sulfotransferase family 1A member 4 ||| Sulfotransferase 1A4 ||| SLX1A-SULT1A3 readthrough (NMD candidate) ||| sulfotransferase family 1A member 3 ||| Sulfotransferase 1A3	.	15.2117	15.0255	14.3027	15.8048	13.9845	16.1721	13.9944	14.6895	15.43	14.4075	-0.5455	0.95662
sp|Q14393|GAS6_HUMAN	sp|Q14393|GAS6_HUMAN	sp|Q14393|GAS6_HUMAN	__Other	sp|Q14393|GAS6_HUMAN	8	8	8	1	8	8	8	15.9	15.9	15.9	74.925	678	678	0	19.195				3553	0	0	0	GAS6_HUMAN Q14393	sp|Q14393|GAS6_HUMAN Growth arrest-specific protein 6 OS=Homo sapiens OX=9606 GN=GAS6 PE=1 SV=3	2621	1	0	GAS6	AXLLG AXSF	protein-coding	13q34	growth arrest specific 6 ||| Growth arrest-specific protein 6	.	14.7969	14.2835	15.6034	14.959	13.4341	13.3788	13.2668	13.8662	13.5179	13.9675	1.60417	0.959803
sp|Q99828|CIB1_HUMAN	sp|Q99828|CIB1_HUMAN	sp|Q99828|CIB1_HUMAN	__Other	sp|Q99828|CIB1_HUMAN	5	5	5	1	5	5	5	30.9	30.9	30.9	21.703	191	191	0	12.19				6456	0	0	0	CIB1_HUMAN Q99828	sp|Q99828|CIB1_HUMAN Calcium and integrin-binding protein 1 OS=Homo sapiens OX=9606 GN=CIB1 PE=1 SV=4	10519	1	0	CIB1	CIB CIBP KIP1 PRKDCIP SIP2-28	protein-coding	15q26.1	calcium and integrin binding 1 ||| Calcium and integrin-binding protein 1	.	15.3601	14.7796	14.028	15.1642	14.1682	15.3287	13.8508	16.0881	13.9299	13.9631	-0.537114	0.599084
sp|Q96BY6|DOC10_HUMAN	sp|Q96BY6|DOC10_HUMAN	sp|Q96BY6|DOC10_HUMAN	__Other	sp|Q96BY6|DOC10_HUMAN	24	24	24	1	24	24	24	14.8	14.8	14.8	249.53	2186	2186	0	94.328				5928	0	0	0	DOC10_HUMAN Q96BY6	sp|Q96BY6|DOC10_HUMAN Dedicator of cytokinesis protein 10 OS=Homo sapiens OX=9606 GN=DOCK10 PE=1 SV=3	55619	1	0	DOCK10	DRIP2 Nbla10300 ZIZ3	protein-coding	2q36.2	dedicator of cytokinesis 10 ||| Dedicator of cytokinesis protein 10	.	15.3626	15.9333	15.5798	14.9932	16.7291	14.8287	14.9226	15.3288	17.0851	15.7069	-0.0669414	-0.653619
sp|P00918|CAH2_HUMAN	sp|P00918|CAH2_HUMAN	sp|P00918|CAH2_HUMAN	__Other	sp|P00918|CAH2_HUMAN	6	6	6	1	6	6	6	30	30	30	29.246	260	260	0	15.942				1260	0	0	0	CAH2_HUMAN P00918	sp|P00918|CAH2_HUMAN Carbonic anhydrase 2 OS=Homo sapiens OX=9606 GN=CA2 PE=1 SV=2	760	1	0	CA2	CA-II CAC CAII Car2 HEL-76 HEL-S-282	protein-coding	8q21.2	carbonic anhydrase 2	.	13.7801	16.5603	16.2338	15.4732	16.1204	17.0523	17.8284	15.2121	15.9542	16.5105	-0.064311	-0.824887
sp|Q0P6H9|TMM62_HUMAN	sp|Q0P6H9|TMM62_HUMAN	sp|Q0P6H9|TMM62_HUMAN	__Other	sp|Q0P6H9|TMM62_HUMAN	1	1	1	1	1	1	1	3.7	3.7	3.7	73.132	643	643	0	4.4136				3227	0	0	0	TMM62_HUMAN Q0P6H9	sp|Q0P6H9|TMM62_HUMAN Transmembrane protein 62 OS=Homo sapiens OX=9606 GN=TMEM62 PE=1 SV=1	80021	1	0	TMEM62	---	protein-coding	15q15.2	transmembrane protein 62	.		9.26646	9.71902	8.67713	9.9268	10.636		9.93552	7.94723	9.19098	0.285773	-0.756116
sp|P04216|THY1_HUMAN	sp|P04216|THY1_HUMAN	sp|P04216|THY1_HUMAN	__Other	sp|P04216|THY1_HUMAN	3	3	3	1	3	3	3	18.6	18.6	18.6	17.935	161	161	0	16.357				1314	0	0	0	THY1_HUMAN P04216	sp|P04216|THY1_HUMAN Thy-1 membrane glycoprotein OS=Homo sapiens OX=9606 GN=THY1 PE=1 SV=2	7070	1	0	THY1	CD90 CDw90	protein-coding	11q23.3	Thy-1 cell surface antigen ||| Thy-1 membrane glycoprotein	.	13.3243	13.449	15.1691	12.7288	12.815	12.6314	12.6466	13.2837	13.314	12.9353	1.9786	-0.461668
sp|Q9Y6B7|AP4B1_HUMAN	sp|Q9Y6B7|AP4B1_HUMAN	sp|Q9Y6B7|AP4B1_HUMAN	__Other	sp|Q9Y6B7|AP4B1_HUMAN	2	2	2	1	2	2	2	5	5	5	83.259	739	739	0	3.676				8523	0	0	0	AP4B1_HUMAN Q9Y6B7	sp|Q9Y6B7|AP4B1_HUMAN AP-4 complex subunit beta-1 OS=Homo sapiens OX=9606 GN=AP4B1 PE=1 SV=2	10717	1	0	AP4B1	BETA-4 CPSQ5 SPG47	protein-coding	1p13.2	adaptor related protein complex 4 subunit beta 1 ||| AP-4 complex subunit beta-1	.		10.0566	10.6246	10.0912	10.905	10.2581	10.2723	10.005	8.09863	10.0532	0.58606	0.0527
sp|Q9Y653|AGRG1_HUMAN	sp|Q9Y653|AGRG1_HUMAN	sp|Q9Y653|AGRG1_HUMAN	__Other	sp|Q9Y653|AGRG1_HUMAN	6	6	6	1	6	6	6	13	13	13	77.737	693	693	0	32.413				8505	0	0	0	AGRG1_HUMAN Q9Y653	sp|Q9Y653|AGRG1_HUMAN Adhesion G-protein coupled receptor G1 OS=Homo sapiens OX=9606 GN=ADGRG1 PE=1 SV=2	9289	1	0	ADGRG1	BFPP BPPR GPR56 TM7LN4 TM7XN1	protein-coding	16q21	adhesion G-protein-coupled receptor G1 ||| Adhesion G-protein coupled receptor G1	.	13.6141	13.9027	13.6348	14.4329	13.0427	14.6144	13.1212	15.386	13.3211	13.4429	-0.239689	0.558411
sp|Q9NUW8|TYDP1_HUMAN	sp|Q9NUW8|TYDP1_HUMAN	sp|Q9NUW8|TYDP1_HUMAN	__Other	sp|Q9NUW8|TYDP1_HUMAN	10	10	10	1	10	10	10	18.6	18.6	18.6	68.42	608	608	0	11.614				7494	0	0	0	TYDP1_HUMAN Q9NUW8	sp|Q9NUW8|TYDP1_HUMAN Tyrosyl-DNA phosphodiesterase 1 OS=Homo sapiens OX=9606 GN=TDP1 PE=1 SV=2	55775	1	0	TDP1	---	protein-coding	14q32.11	tyrosyl-DNA phosphodiesterase 1	.	14.1676	14.2004	14.1621	14.2805	14.6046	12.802	13.9972	14.9324	15.0398	12.9212	0.0695739	0.188023
sp|Q9H246|CA021_HUMAN	sp|Q9H246|CA021_HUMAN	sp|Q9H246|CA021_HUMAN	__Other	sp|Q9H246|CA021_HUMAN	1	1	1	1	1	1	1	10.7	10.7	10.7	13.865	121	121	0	7.9385				6967	0	0	0	CA021_HUMAN Q9H246	sp|Q9H246|CA021_HUMAN Uncharacterized protein C1orf21 OS=Homo sapiens OX=9606 GN=C1orf21 PE=1 SV=1	81563	1	0	C1orf21	PIG13	protein-coding	1q25.3	chromosome 1 open reading frame 21 ||| Uncharacterized protein C1orf21	.		9.61101	10.4355	8.95215	7.80315	9.12705	9.37176	10.4091	9.44321	9.5768	1.04567	-0.437688
sp|O75954|TSN9_HUMAN	sp|O75954|TSN9_HUMAN	sp|O75954|TSN9_HUMAN	__Other	sp|O75954|TSN9_HUMAN	2	2	2	1	2	2	2	13.8	13.8	13.8	26.779	239	239	0	4.9428				990	0	0	0	TSN9_HUMAN O75954	sp|O75954|TSN9_HUMAN Tetraspanin-9 OS=Homo sapiens OX=9606 GN=TSPAN9 PE=1 SV=1	10867	1	0	TSPAN9	NET-5 NET5 PP1057	protein-coding	12p13.33-p13.32	tetraspanin 9 ||| Tetraspanin-9	.		11.8169	11.952	10.8076	11.6127	12.5112	11.9257	10.2071	11.067	12.6134	0.364922	-0.779464
sp|O75368|SH3L1_HUMAN	sp|O75368|SH3L1_HUMAN	sp|O75368|SH3L1_HUMAN	__Other	sp|O75368|SH3L1_HUMAN	11	11	11	1	11	11	11	89.5	89.5	89.5	12.774	114	114	0	48.781				876	0	0	0	SH3L1_HUMAN O75368	sp|O75368|SH3L1_HUMAN SH3 domain-binding glutamic acid-rich-like protein OS=Homo sapiens OX=9606 GN=SH3BGRL PE=1 SV=1	6451	1	0	SH3BGRL	HEL-S-115 SH3BGR	protein-coding	Xq21.1	SH3 domain binding glutamate rich protein like ||| SH3 domain-binding glutamic acid-rich-like protein	.	15.9652	16.0674	16.8229	16.6135	15.9967	14.5215	14.8383	16.0773	16.4166	16.416	0.860092	0.65065
sp|O95848|NUD14_HUMAN	sp|O95848|NUD14_HUMAN	sp|O95848|NUD14_HUMAN	__Other	sp|O95848|NUD14_HUMAN	1	1	1	1	1	1	1	15.8	15.8	15.8	24.118	222	222	0	6.2619				1205	0	0	0	NUD14_HUMAN O95848	sp|O95848|NUD14_HUMAN Uridine diphosphate glucose pyrophosphatase NUDT14 OS=Homo sapiens OX=9606 GN=NUDT14 PE=1 SV=2	256281	1	0	NUDT14	UGPP UGPPase	protein-coding	14q32.33	nudix hydrolase 14 ||| Uridine diphosphate glucose pyrophosphatase NUDT14	.		7.10098	9.53754	7.44945		8.52514	9.1249	10.2971	8.49651	8.91619	0.630858	-1.45723
sp|Q8TEA8|DTD1_HUMAN	sp|Q8TEA8|DTD1_HUMAN	sp|Q8TEA8|DTD1_HUMAN	__Other	sp|Q8TEA8|DTD1_HUMAN	4	4	4	1	4	4	4	27.3	27.3	27.3	23.423	209	209	0	29.907				5507	0	0	0	DTD1_HUMAN Q8TEA8	sp|Q8TEA8|DTD1_HUMAN D-aminoacyl-tRNA deacylase 1 OS=Homo sapiens OX=9606 GN=DTD1 PE=1 SV=2	92675	1	0	DTD1	C20orf88 DTD DUE-B DUEB HARS2 pqn-68	protein-coding	20p11.23	D-aminoacyl-tRNA deacylase 1	.	13.3864	14.3918	15.33	14.1625	12.4315	14.2875	14.4509	14.7069	14.6001	13.9948	1.08443	-0.0829843
sp|Q969T4|UB2E3_HUMAN	sp|Q969T4|UB2E3_HUMAN	sp|Q969T4|UB2E3_HUMAN	__Other	sp|Q969T4|UB2E3_HUMAN	6	3	3	1	6	3	3	51.2	33.3	33.3	22.912	207	207	0	19.931				5844	0	0	0	UB2E3_HUMAN Q969T4	sp|Q969T4|UB2E3_HUMAN Ubiquitin-conjugating enzyme E2 E3 OS=Homo sapiens OX=9606 GN=UBE2E3 PE=1 SV=1	10477 286480	2	5	UBE2E3 UBE2E4P	UBCH9 UbcM2	protein-coding|pseudo	2q31.3!Xp22.2	ubiquitin conjugating enzyme E2 E3 ||| ubiquitin conjugating enzyme E2 E4 pseudogene ||| Ubiquitin-conjugating enzyme E2 E3	.	12.0687	12.6787	12.2092	13.1856	11.4759	12.0397	11.2895	13.3144	13.5008	12.4507	-0.224037	0.752366
sp|Q9BSW2|EFC4B_HUMAN	sp|Q9BSW2|EFC4B_HUMAN	sp|Q9BSW2|EFC4B_HUMAN	__Other	sp|Q9BSW2|EFC4B_HUMAN	4	4	4	1	4	4	4	13.2	13.2	13.2	45.591	395	395	0	10.504				6587	0	0	0	EFC4B_HUMAN Q9BSW2	sp|Q9BSW2|EFC4B_HUMAN EF-hand calcium-binding domain-containing protein 4B OS=Homo sapiens OX=9606 GN=CRACR2A PE=1 SV=1	84766	1	0	CRACR2A	EFCAB4B	protein-coding	12p13.32	calcium release activated channel regulator 2A ||| EF-hand calcium-binding domain-containing protein 4B	.	11.4598	13.7778	13.3709	13.9122	14.8827	12.5579	12.5908	13.3258	13.6558	14.5668	-0.236912	0.304311
sp|Q6KB66|K2C80_HUMAN;CON__Q0VBK2;CON__Q6KB66-1	sp|Q6KB66|K2C80_HUMAN;CON__Q6KB66-1;CON__Q0VBK2	sp|Q6KB66|K2C80_HUMAN;CON__Q0VBK2;CON__Q6KB66-1	__Other	sp|Q6KB66|K2C80_HUMAN;CON__Q6KB66-1	32;32;9	31;31;9	31;31;9	3	32	31	31	64.6	62.2	62.2	50.525	452	452;452;452	0	93.866			+	71	2	0	0	Q6KB66-1 K2C80_HUMAN Q6KB66	sp|Q6KB66|K2C80_HUMAN Keratin, type II cytoskeletal 80 OS=Homo sapiens OX=9606 GN=KRT80 PE=1 SV=2;	144501	1	0	KRT80	KB20	protein-coding	12q13.13	keratin 80 ||| keratin 80 ||| Keratin, type II cytoskeletal 80	.	16.8972	17.3651	18.9762	16.7973	16.7377	16.7983	16.6008	17.8424	16.6638	16.788	1.82564	-0.353223
sp|P09493|TPM1_HUMAN	sp|P09493|TPM1_HUMAN	sp|P09493|TPM1_HUMAN	__Other	sp|P09493|TPM1_HUMAN	36	19	14	1	36	19	14	71.1	50.4	34.5	32.708	284	284	0	124.14				1473	0	0	0	TPM1_HUMAN P09493	sp|P09493|TPM1_HUMAN Tropomyosin alpha-1 chain OS=Homo sapiens OX=9606 GN=TPM1 PE=1 SV=2	7168	1	0	TPM1	C15orf13 CMD1Y CMH3 HEL-S-265 HTM-alpha LVNC9 TMSA	protein-coding	15q22.2	tropomyosin 1 ||| Tropomyosin alpha-1 chain	.	15.6909	17.385	17.9876	16.0236	17.5674	16.2746	17.941	16.5223	16.8204	18.0701	0.836722	-1.12729
sp|P43897|EFTS_HUMAN	sp|P43897|EFTS_HUMAN	sp|P43897|EFTS_HUMAN	__Other	sp|P43897|EFTS_HUMAN	20	20	20	1	20	20	20	60.6	60.6	60.6	35.39	325	325	0	323.31				2311	0	0	0	EFTS_HUMAN P43897	sp|P43897|EFTS_HUMAN Elongation factor Ts, mitochondrial OS=Homo sapiens OX=9606 GN=TSFM PE=1 SV=2	10102	1	0	TSFM	EFTS EFTSMT	protein-coding	12q14.1	Ts translation elongation factor, mitochondrial ||| Elongation factor Ts, mitochondrial	.	17.2443	17.8867	17.6081	17.1201	19.592	17.5305	18.0505	17.2102	17.3568	17.03	-0.0791877	-0.567183
sp|Q16798|MAON_HUMAN	sp|Q16798|MAON_HUMAN	sp|Q16798|MAON_HUMAN	__Other	sp|Q16798|MAON_HUMAN	12	11	11	1	12	11	11	25.5	24	24	67.068	604	604	0	39.191				3885	0	0	0	MAON_HUMAN Q16798	sp|Q16798|MAON_HUMAN NADP-dependent malic enzyme, mitochondrial OS=Homo sapiens OX=9606 GN=ME3 PE=2 SV=2	10873	1	0	ME3	NADP-ME	protein-coding	11q14.2	malic enzyme 3 ||| NADP-dependent malic enzyme, mitochondrial	.	16.5251	15.6086	16.3697	16.842	15.5466	14.7567	14.4506	16.0569	15.2591	14.9701	0.838218	1.31054
sp|Q53RY4|KCP3_HUMAN	sp|Q53RY4|KCP3_HUMAN	sp|Q53RY4|KCP3_HUMAN	__Other	sp|Q53RY4|KCP3_HUMAN	3	3	3	1	3	3	3	26.2	26.2	26.2	25.627	240	240	0	59.783				4038	0	0	0	KCP3_HUMAN Q53RY4	sp|Q53RY4|KCP3_HUMAN Keratinocyte-associated protein 3 OS=Homo sapiens OX=9606 GN=KRTCAP3 PE=2 SV=1	200634	1	0	KRTCAP3	KCP3	protein-coding	2p23.3	keratinocyte associated protein 3 ||| Keratinocyte-associated protein 3	.		12.3676	11.4461	12.6615	11.6688	13.824	11.6744	12.7354	11.681	11.6284	-0.718896	0.496573
sp|Q16363|LAMA4_HUMAN	sp|Q16363|LAMA4_HUMAN	sp|Q16363|LAMA4_HUMAN	__Other	sp|Q16363|LAMA4_HUMAN	18	18	18	1	18	18	18	13.2	13.2	13.2	202.52	1823	1823	0	196.95				3833	0	0	0	LAMA4_HUMAN Q16363	sp|Q16363|LAMA4_HUMAN Laminin subunit alpha-4 OS=Homo sapiens OX=9606 GN=LAMA4 PE=1 SV=4	3910	1	0	LAMA4	CMD1JJ LAMA3 LAMA4*-1	protein-coding	6q21	laminin subunit alpha 4 ||| Laminin subunit alpha-4	.	14.3248	15.2598	15.4649	14.4581	16.6032	14.4158	14.1701	14.5007	14.4455	15.455	0.525752	-0.481087
sp|Q9H9P5|UNKL_HUMAN	sp|Q9H9P5|UNKL_HUMAN	sp|Q9H9P5|UNKL_HUMAN	__Other	sp|Q9H9P5|UNKL_HUMAN	1	1	1	1	1	1	1	1.9	1.9	1.9	73.827	680	680	0.0062605	1.2682				7181	0	0	0	UNKL_HUMAN Q9H9P5	sp|Q9H9P5|UNKL_HUMAN Putative E3 ubiquitin-protein ligase UNKL OS=Homo sapiens OX=9606 GN=UNKL PE=1 SV=3	64718	1	0	UNKL	C16orf28 ZC3H5L ZC3HDC5L	protein-coding	16p13.3	unk like zinc finger ||| Putative E3 ubiquitin-protein ligase UNKL	.		10.6232	10.1369	9.39461	9.26731	10.6977	10.596	11.2661	11.4598	11.1417	-0.35813	-1.1004
sp|Q9BV40|VAMP8_HUMAN	sp|Q9BV40|VAMP8_HUMAN	sp|Q9BV40|VAMP8_HUMAN	__Other	sp|Q9BV40|VAMP8_HUMAN	4	4	4	1	4	4	4	33	33	33	11.438	100	100	0	21.583				6661	0	0	0	VAMP8_HUMAN Q9BV40	sp|Q9BV40|VAMP8_HUMAN Vesicle-associated membrane protein 8 OS=Homo sapiens OX=9606 GN=VAMP8 PE=1 SV=1	8673	1	0	VAMP8	EDB VAMP-8	protein-coding	2p11.2	vesicle associated membrane protein 8 ||| Vesicle-associated membrane protein 8	.	15.4567	14.9683	14.1841	15.9591	15.2025	15.5649	14.3948	15.693	14.3789	13.6696	-0.696723	1.07822
sp|P16157|ANK1_HUMAN	sp|P16157|ANK1_HUMAN	sp|P16157|ANK1_HUMAN	__Other	sp|P16157|ANK1_HUMAN	3	2	2	1	3	2	2	1.5	1.2	1.2	206.26	1881	1881	0	3.6233				1691	0	0	0	ANK1_HUMAN P16157	sp|P16157|ANK1_HUMAN Ankyrin-1 OS=Homo sapiens OX=9606 GN=ANK1 PE=1 SV=3	286	1	0	ANK1	ANK SPH1 SPH2	protein-coding	8p11.21	ankyrin 1 ||| Ankyrin-1	.		11.3405	12.0271	10.2877	12.5199	10.4139	10.4894	10.9958	11.3685	10.4944	0.952511	-0.786904
sp|Q9H299|SH3L3_HUMAN	sp|Q9H299|SH3L3_HUMAN	sp|Q9H299|SH3L3_HUMAN	__Other	sp|Q9H299|SH3L3_HUMAN	8	8	8	1	8	8	8	89.2	89.2	89.2	10.438	93	93	0	162.46				6972	0	0	0	SH3L3_HUMAN Q9H299	sp|Q9H299|SH3L3_HUMAN SH3 domain-binding glutamic acid-rich-like protein 3 OS=Homo sapiens OX=9606 GN=SH3BGRL3 PE=1 SV=1	83442	1	0	SH3BGRL3	HEL-S-297 SH3BP-1 TIP-B1	protein-coding	1p36.11	SH3 domain binding glutamate rich protein like 3 ||| SH3 domain-binding glutamic acid-rich-like protein 3	.	17.2385	17.5644	18.7912	17.1103	17.8277	15.8737	16.8703	17.4117	17.4846	17.5218	1.42982	-0.25116
sp|Q9UL42|PNMA2_HUMAN	sp|Q9UL42|PNMA2_HUMAN	sp|Q9UL42|PNMA2_HUMAN	__Other	sp|Q9UL42|PNMA2_HUMAN	12	12	12	1	12	12	12	43.7	43.7	43.7	41.509	364	364	0	72.532				8060	0	0	0	PNMA2_HUMAN Q9UL42	sp|Q9UL42|PNMA2_HUMAN Paraneoplastic antigen Ma2 OS=Homo sapiens OX=9606 GN=PNMA2 PE=1 SV=2	10687	1	0	PNMA2	MA2 MM2 RGAG2	protein-coding	8p21.2	PNMA family member 2 ||| Paraneoplastic antigen Ma2	.	14.8291	15.4286	16.9893	14.6895	15.1761	14.8258	15.7924	14.6589	14.7295	14.6087	1.8055	-0.494255
sp|P17342|ANPRC_HUMAN	sp|P17342|ANPRC_HUMAN	sp|P17342|ANPRC_HUMAN	__Other	sp|P17342|ANPRC_HUMAN	3	3	3	1	3	3	3	4.8	4.8	4.8	59.807	541	541	0.0013712	2.1163				1729	0	0	0	ANPRC_HUMAN P17342	sp|P17342|ANPRC_HUMAN Atrial natriuretic peptide receptor 3 OS=Homo sapiens OX=9606 GN=NPR3 PE=1 SV=2	4883	1	0	NPR3	ANP-C ANPR-C ANPRC C5orf23 GUCY2B NPR-C NPRC	protein-coding	5p13.3	natriuretic peptide receptor 3 ||| Atrial natriuretic peptide receptor 3	.	13.4592	13.2404	12.6813	12.3506	14.5048	13.6573	12.2019	12.8537	13.6436	12.2754	-0.339731	-0.670473
sp|P52799|EFNB2_HUMAN	sp|P52799|EFNB2_HUMAN	sp|P52799|EFNB2_HUMAN	__Other	sp|P52799|EFNB2_HUMAN	6	6	6	1	6	6	6	22.5	22.5	22.5	36.923	333	333	0	15.69				2584	0	0	0	EFNB2_HUMAN P52799	sp|P52799|EFNB2_HUMAN Ephrin-B2 OS=Homo sapiens OX=9606 GN=EFNB2 PE=1 SV=1	1948	1	0	EFNB2	EPLG5 HTKL Htk-L LERK5	protein-coding	13q33.3	ephrin B2 ||| Ephrin-B2	.	14.7778	15.45	15.9888	15.5961	15.0567	14.5802	13.6429	15.92	15.368	16.0375	0.715072	0.322359
sp|P07305|H10_HUMAN	sp|P07305|H10_HUMAN	sp|P07305|H10_HUMAN	__Other	sp|P07305|H10_HUMAN	7	7	7	1	7	7	7	27.8	27.8	27.8	20.863	194	194	0	31.497				1400	0	0	0	H10_HUMAN P07305	sp|P07305|H10_HUMAN Histone H1.0 OS=Homo sapiens OX=9606 GN=H1F0 PE=1 SV=3	3005	1	0	H1-0	H1.0 H10 H1F0 H1FV	protein-coding	22q13.1	H1.0 linker histone ||| Histone H1.0	.	17.524	16.8448	16.681	17.208	16.2893	16.4245	18.048	17.4457	15.8344	15.6105	-0.0116726	0.515337
sp|P32004|L1CAM_HUMAN	sp|P32004|L1CAM_HUMAN	sp|P32004|L1CAM_HUMAN	__Other	sp|P32004|L1CAM_HUMAN	26	26	26	1	26	26	26	27.4	27.4	27.4	140	1257	1257	0	173.81				2086	0	0	0	L1CAM_HUMAN P32004	sp|P32004|L1CAM_HUMAN Neural cell adhesion molecule L1 OS=Homo sapiens OX=9606 GN=L1CAM PE=1 SV=2	3897	1	0	L1CAM	CAML1 CD171 HSAS HSAS1 MASA MIC5 N-CAM-L1 N-CAML1 NCAM-L1 S10 SPG1	protein-coding	Xq28	L1 cell adhesion molecule ||| Neural cell adhesion molecule L1	.	17.0944	17.4081	18.2553	16.5506	16.2511	17.6228	18.3277	16.4327	16.6592	17.3957	1.06842	-0.636247
sp|Q29963|1C06_HUMAN	sp|Q29963|1C06_HUMAN	sp|Q29963|1C06_HUMAN	__Other	sp|Q29963|1C06_HUMAN	18	2	0	1	18	2	0	51.6	6.8	0	40.968	366	366	0	10.67				3912	0	0	0	---	sp|Q29963|1C06_HUMAN HLA class I histocompatibility antigen, Cw-6 alpha chain OS=Homo sapiens OX=9606 GN=HLA-C PE=1 SV=2	---	0	1	---	---	---	---	---	.	14.5371	13.8624	13.2932	14.094	14.243	14.6049	14.4123	12.5162	12.4947	13.6626	-0.371925	0.428889
sp|Q9H237|PORCN_HUMAN	sp|Q9H237|PORCN_HUMAN	sp|Q9H237|PORCN_HUMAN	__Other	sp|Q9H237|PORCN_HUMAN	1	1	1	1	1	1	1	4.1	4.1	4.1	52.317	461	461	0	27.899				6966	0	0	0	PORCN_HUMAN Q9H237	sp|Q9H237|PORCN_HUMAN Protein-serine O-palmitoleoyltransferase porcupine OS=Homo sapiens OX=9606 GN=PORCN PE=1 SV=2	64840	1	0	PORCN	DHOF FODH MG61 PORC PPN	protein-coding	Xp11.23	porcupine O-acyltransferase ||| Protein-serine O-palmitoleoyltransferase porcupine	.	12.7869	12.5515	13.6735	12.0386	12.6756	11.9447	11.3319	12.9244	11.643	11.359	1.47468	-0.160262
sp|Q16625|OCLN_HUMAN	sp|Q16625|OCLN_HUMAN	sp|Q16625|OCLN_HUMAN	__Other	sp|Q16625|OCLN_HUMAN	9	9	9	1	9	9	9	25.7	25.7	25.7	59.143	522	522	0	127.81				3856	0	0	0	OCLN_HUMAN Q16625	sp|Q16625|OCLN_HUMAN Occludin OS=Homo sapiens OX=9606 GN=OCLN PE=1 SV=1	100506658	1	0	OCLN	BLCPMG PPP1R115 PTORCH1	protein-coding	5q13.2	occludin	.	16.5688	16.1889	16.3677	16.9518	15.0036	17.3087	15.7848	16.4518	15.769	15.1069	0.274622	0.858774
sp|Q8IVF2|AHNK2_HUMAN	sp|Q8IVF2|AHNK2_HUMAN	sp|Q8IVF2|AHNK2_HUMAN	__Other	sp|Q8IVF2|AHNK2_HUMAN	129	128	128	1	129	128	128	49.7	49.7	49.7	616.62	5795	5795	0	323.31				4937	0	0	0	AHNK2_HUMAN Q8IVF2	sp|Q8IVF2|AHNK2_HUMAN Protein AHNAK2 OS=Homo sapiens OX=9606 GN=AHNAK2 PE=1 SV=2	113146	1	0	AHNAK2	C14orf78	protein-coding	14q32.33	AHNAK nucleoprotein 2 ||| Protein AHNAK2	.	19.4261	19.3165	20.424	19.3784	19.4275	18.5262	19.0056	20.282	18.4004	18.2533	1.21179	0.166228
sp|O60331|PI51C_HUMAN	sp|O60331|PI51C_HUMAN	sp|O60331|PI51C_HUMAN	__Other	sp|O60331|PI51C_HUMAN	4	1	1	1	4	1	1	7	2.7	2.7	73.259	668	668	0.0056894	1.3622				731	0	0	0	PI51C_HUMAN O60331	sp|O60331|PI51C_HUMAN Phosphatidylinositol 4-phosphate 5-kinase type-1 gamma OS=Homo sapiens OX=9606 GN=PIP5K1C PE=1 SV=2	23396	1	0	PIP5K1C	LCCS3 PIP5K-GAMMA PIP5K1-gamma PIP5Kgamma	protein-coding	19p13.3	phosphatidylinositol-4-phosphate 5-kinase type 1 gamma ||| Phosphatidylinositol 4-phosphate 5-kinase type-1 gamma	.		10.2008	11.0641	9.76441	10.4219	9.07975	10.1373	8.88385	11.0876	10.464	0.951211	-0.348452
sp|Q7Z7K6|CENPV_HUMAN	sp|Q7Z7K6|CENPV_HUMAN	sp|Q7Z7K6|CENPV_HUMAN	__Other	sp|Q7Z7K6|CENPV_HUMAN	13	13	13	1	13	13	13	61.8	61.8	61.8	29.946	275	275	0	83.782				4761	0	0	0	CENPV_HUMAN Q7Z7K6	sp|Q7Z7K6|CENPV_HUMAN Centromere protein V OS=Homo sapiens OX=9606 GN=CENPV PE=1 SV=1	201161	1	0	CENPV	3110013H01Rik CENP-V PRR6 p30	protein-coding	17p11.2	centromere protein V	.	14.789	15.7724	15.0693	14.7212	15.934	14.5306	16.29	14.7893	16.2833	16.5557	-0.452334	-0.800455
sp|Q9NZR1|TMOD2_HUMAN	sp|Q9NZR1|TMOD2_HUMAN	sp|Q9NZR1|TMOD2_HUMAN	__Other	sp|Q9NZR1|TMOD2_HUMAN	3	2	2	1	3	2	2	14.2	11.7	11.7	39.595	351	351	0	7.7733				7707	0	0	0	TMOD2_HUMAN Q9NZR1	sp|Q9NZR1|TMOD2_HUMAN Tropomodulin-2 OS=Homo sapiens OX=9606 GN=TMOD2 PE=1 SV=1	29767	1	0	TMOD2	N-TMOD NTMOD	protein-coding	15q21.2	tropomodulin 2 ||| Tropomodulin-2	.		7.81686	6.94272	8.94189	6.97316		8.67842	7.78524	6.78335	8.19572	-0.814498	1.18468
sp|P35555|FBN1_HUMAN	sp|P35555|FBN1_HUMAN	sp|P35555|FBN1_HUMAN	__Other	sp|P35555|FBN1_HUMAN	17	17	17	1	17	17	17	8.5	8.5	8.5	312.3	2871	2871	0	115.31				2144	0	0	0	FBN1_HUMAN P35555	sp|P35555|FBN1_HUMAN Fibrillin-1 OS=Homo sapiens OX=9606 GN=FBN1 PE=1 SV=4	2200	1	0	FBN1	ACMICD ECTOL1 FBN GPHYSD2 MASS MFLS MFS1 OCTD SGS SSKS WMS WMS2	protein-coding	15q21.1	fibrillin 1 ||| Fibrillin-1	.	15.0053	15.4905	16.4024	14.8366	16.6357	14.4072	14.6173	14.8145	15.4512	15.5158	1.06734	-0.498498
sp|Q5K651|SAMD9_HUMAN	sp|Q5K651|SAMD9_HUMAN	sp|Q5K651|SAMD9_HUMAN	__Other	sp|Q5K651|SAMD9_HUMAN	44	44	41	1	44	44	41	35.5	35.5	33.9	184.28	1589	1589	0	323.31				4116	0	0	0	SAMD9_HUMAN Q5K651	sp|Q5K651|SAMD9_HUMAN Sterile alpha motif domain-containing protein 9 OS=Homo sapiens OX=9606 GN=SAMD9 PE=1 SV=1	54809	1	0	SAMD9	C7orf5 DRIF1 MIRAGE NFTC OEF1 OEF2	protein-coding	7q21.2	sterile alpha motif domain containing 9 ||| Sterile alpha motif domain-containing protein 9	.	17.4569	17.5875	17.9104	17.3283	18.2797	16.5026	16.4928	17.7351	18.7291	16.8727	0.429055	-0.153041
sp|Q76M96|CCD80_HUMAN	sp|Q76M96|CCD80_HUMAN	sp|Q76M96|CCD80_HUMAN	__Other	sp|Q76M96|CCD80_HUMAN	4	4	4	1	4	4	4	6.7	6.7	6.7	108.17	950	950	0	33.651				4623	0	0	0	CCD80_HUMAN Q76M96	sp|Q76M96|CCD80_HUMAN Coiled-coil domain-containing protein 80 OS=Homo sapiens OX=9606 GN=CCDC80 PE=1 SV=1	151887	1	0	CCDC80	CL2 DRO1 LINC01279 SSG1 URB okuribin	protein-coding	3q13.2	coiled-coil domain containing 80 ||| Coiled-coil domain-containing protein 80	.	11.0973	12.4163	14.106	12.0707	11.7864	11.3849	11.7457	12.2367	11.9403	12.0734	1.93799	-0.0973286
sp|Q96IR7|HPDL_HUMAN	sp|Q96IR7|HPDL_HUMAN	sp|Q96IR7|HPDL_HUMAN	__Other	sp|Q96IR7|HPDL_HUMAN	12	12	12	1	12	12	12	47.2	47.2	47.2	39.385	371	371	0	60.145				6155	0	0	0	HPDL_HUMAN Q96IR7	sp|Q96IR7|HPDL_HUMAN 4-hydroxyphenylpyruvate dioxygenase-like protein OS=Homo sapiens OX=9606 GN=HPDL PE=1 SV=1	84842	1	0	HPDL	4-HPPD-L GLOXD1	protein-coding	1p34.1	4-hydroxyphenylpyruvate dioxygenase like ||| 4-hydroxyphenylpyruvate dioxygenase-like protein	.	15.2524	15.9462	15.0986	15.0136	17.0477	16.4763	15.2284	16.2567	16.5133	15.0223	-0.733505	-0.818519
sp|Q9BUT1|BDH2_HUMAN	sp|Q9BUT1|BDH2_HUMAN	sp|Q9BUT1|BDH2_HUMAN	__Other	sp|Q9BUT1|BDH2_HUMAN	6	6	6	1	6	6	6	24.5	24.5	24.5	26.724	245	245	0	12.703				6651	0	0	0	BDH2_HUMAN Q9BUT1	sp|Q9BUT1|BDH2_HUMAN 3-hydroxybutyrate dehydrogenase type 2 OS=Homo sapiens OX=9606 GN=BDH2 PE=1 SV=2	56898	1	0	BDH2	DHRS6 EFA6R PRO20933 SDR15C1 UCPA-OR UNQ6308	protein-coding	4q24	3-hydroxybutyrate dehydrogenase 2 ||| 3-hydroxybutyrate dehydrogenase type 2	.	15.4924	15.0743	15.435	15.5367	16.1171	13.7974	13.97	15.3605	15.0036	14.3486	0.488847	0.590592
sp|P30512|1A29_HUMAN	sp|P30512|1A29_HUMAN	sp|P30512|1A29_HUMAN	__Other	sp|P30512|1A29_HUMAN	20	3	0	1	20	3	0	53.7	7.7	0	40.862	365	365	0	5.7303				2047	0	0	0	---	sp|P30512|1A29_HUMAN HLA class I histocompatibility antigen, A-29 alpha chain OS=Homo sapiens OX=9606 GN=HLA-A PE=1 SV=2	---	0	1	---	---	---	---	---	.	12.865	12.3902	14.2146	11.7988	11.9052	11.874	12.3182	12.342	11.8876	11.7115	1.95814	-0.457712
sp|P04156|PRIO_HUMAN	sp|P04156|PRIO_HUMAN	sp|P04156|PRIO_HUMAN	__Other	sp|P04156|PRIO_HUMAN	7	7	7	1	7	7	7	28.5	28.5	28.5	27.661	253	253	0	14.954				1310	0	0	0	PRIO_HUMAN P04156	sp|P04156|PRIO_HUMAN Major prion protein OS=Homo sapiens OX=9606 GN=PRNP PE=1 SV=1	5621	1	0	PRNP	ASCR AltPrP CD230 CJD GSS KURU PRIP PrP PrP27-30 PrP33-35C PrPc p27-30	protein-coding	20p13	prion protein ||| Major prion protein	.	14.3942	15.7101	15.9542	14.935	14.1176	15.2912	15.3214	15.285	15.5887	16.9896	0.518826	-0.500337
sp|Q8TBC5|ZSC18_HUMAN	sp|Q8TBC5|ZSC18_HUMAN	sp|Q8TBC5|ZSC18_HUMAN	__Other	sp|Q8TBC5|ZSC18_HUMAN	2	2	2	1	2	2	2	9.6	9.6	9.6	54.803	510	510	0	11.693				5443	0	0	0	ZSC18_HUMAN Q8TBC5	sp|Q8TBC5|ZSC18_HUMAN Zinc finger and SCAN domain-containing protein 18 OS=Homo sapiens OX=9606 GN=ZSCAN18 PE=2 SV=2	65982	1	0	ZSCAN18	ZNF447	protein-coding	19q13.43	zinc finger and SCAN domain containing 18 ||| Zinc finger and SCAN domain-containing protein 18	.	11.2864	10.8201	10.6515	10.9946	9.41161	9.2857	10.5198	11.6916	9.91141	10.8321	0.239214	0.582266
sp|Q9HB09|B2L12_HUMAN	sp|Q9HB09|B2L12_HUMAN	sp|Q9HB09|B2L12_HUMAN	__Other	sp|Q9HB09|B2L12_HUMAN	2	2	2	1	2	2	2	6.6	6.6	6.6	36.821	334	334	0	9.7084				7215	0	0	0	B2L12_HUMAN Q9HB09	sp|Q9HB09|B2L12_HUMAN Bcl-2-like protein 12 OS=Homo sapiens OX=9606 GN=BCL2L12 PE=1 SV=1	83596	1	0	BCL2L12	---	protein-coding	19q13.33	BCL2 like 12 ||| Bcl-2-like protein 12	.		12.5169	12.122	10.6745	12.5575	12.6654	13.6142	12.1122	12.3607	12.6415	-0.221461	-1.66902
sp|Q13835|PKP1_HUMAN	sp|Q13835|PKP1_HUMAN	sp|Q13835|PKP1_HUMAN	__Other	sp|Q13835|PKP1_HUMAN	7	7	7	1	7	7	7	11.8	11.8	11.8	82.86	747	747	0	21.962				3467	0	0	0	PKP1_HUMAN Q13835	sp|Q13835|PKP1_HUMAN Plakophilin-1 OS=Homo sapiens OX=9606 GN=PKP1 PE=1 SV=2	5317	1	0	PKP1	B6P	protein-coding	1q32.1	plakophilin 1 ||| Plakophilin-1	.	13.7507	14.6636	14.4163	13.9473	16.2711	13.7307	13.9244	14.2523	14.0095	13.9139	0.108129	-0.360901
sp|P23497|SP100_HUMAN	sp|P23497|SP100_HUMAN	sp|P23497|SP100_HUMAN	__Other	sp|P23497|SP100_HUMAN	18	15	11	1	18	15	11	24.3	22.3	19.1	100.42	879	879	0	232.62				1881	0	0	0	SP100_HUMAN P23497	sp|P23497|SP100_HUMAN Nuclear autoantigen Sp-100 OS=Homo sapiens OX=9606 GN=SP100 PE=1 SV=3	6672	1	0	SP100	lysp100b	protein-coding	2q37.1	SP100 nuclear antigen ||| Nuclear autoantigen Sp-100	.	17.7492	16.9491	17.1493	18.1962	16.8572	15.9386	15.6358	17.4933	17.1123	16.6737	0.267249	1.31412
sp|Q08380|LG3BP_HUMAN	sp|Q08380|LG3BP_HUMAN	sp|Q08380|LG3BP_HUMAN	__Other	sp|Q08380|LG3BP_HUMAN	21	21	21	1	21	21	21	46	46	46	65.33	585	585	0	230.98				3204	0	0	0	LG3BP_HUMAN Q08380	sp|Q08380|LG3BP_HUMAN Galectin-3-binding protein OS=Homo sapiens OX=9606 GN=LGALS3BP PE=1 SV=1	3959	1	0	LGALS3BP	90K BTBD17B CyCAP M2BP MAC-2-BP TANGO10B gp90	protein-coding	17q25.3	galectin 3 binding protein ||| Galectin-3-binding protein	.	18.5335	18.2917	17.7307	18.5655	18.2031	18.9748	16.83	19.4243	17.769	17.741	-0.424085	0.410714
sp|Q8N584|TT39C_HUMAN	sp|Q8N584|TT39C_HUMAN	sp|Q8N584|TT39C_HUMAN	__Other	sp|Q8N584|TT39C_HUMAN	8	8	8	1	8	8	8	18.9	18.9	18.9	65.869	583	583	0	28.738				5168	0	0	0	TT39C_HUMAN Q8N584	sp|Q8N584|TT39C_HUMAN Tetratricopeptide repeat protein 39C OS=Homo sapiens OX=9606 GN=TTC39C PE=2 SV=2	125488	1	0	TTC39C	C18orf17 HsT2697	protein-coding	18q11.2	tetratricopeptide repeat domain 39C ||| Tetratricopeptide repeat protein 39C	.	14.9406	15.4836	15.229	14.5533	15.6858	15.8901	16.8103	14.3811	15.6572	14.6518	-0.128301	-0.804001
sp|Q9ULZ3|ASC_HUMAN	sp|Q9ULZ3|ASC_HUMAN	sp|Q9ULZ3|ASC_HUMAN	__Other	sp|Q9ULZ3|ASC_HUMAN	9	9	9	1	9	9	9	46.2	46.2	46.2	21.627	195	195	0	14.838				8105	0	0	0	ASC_HUMAN Q9ULZ3	sp|Q9ULZ3|ASC_HUMAN Apoptosis-associated speck-like protein containing a CARD OS=Homo sapiens OX=9606 GN=PYCARD PE=1 SV=2	29108	1	0	PYCARD	ASC CARD5 TMS TMS-1 TMS1	protein-coding	16p11.2	PYD and CARD domain containing ||| Apoptosis-associated speck-like protein containing a CARD	.	14.6903	14.4299	15.5567	14.4798	13.8664	13.6263	15.6666	13.6564	13.8993	14.6438	1.13229	0.055375
sp|Q8IY21|DDX60_HUMAN	sp|Q8IY21|DDX60_HUMAN	sp|Q8IY21|DDX60_HUMAN	__Other	sp|Q8IY21|DDX60_HUMAN	9	9	9	1	9	9	9	7.1	7.1	7.1	197.85	1712	1712	0	22.984				5021	0	0	0	DDX60_HUMAN Q8IY21	sp|Q8IY21|DDX60_HUMAN Probable ATP-dependent RNA helicase DDX60 OS=Homo sapiens OX=9606 GN=DDX60 PE=1 SV=3	55601	1	0	DDX60	---	protein-coding	4q32.3	DExD/H-box helicase 60 ||| Probable ATP-dependent RNA helicase DDX60	.	14.2085	13.6989	13.798	14.5797	13.4024	12.7852	12.6278	14.9627	13.3687	13.241	0.202265	0.984005
sp|P13746|1A11_HUMAN	sp|P13746|1A11_HUMAN	sp|P13746|1A11_HUMAN	__Other	sp|P13746|1A11_HUMAN	23	2	2	1	23	2	2	55.6	3.6	3.6	40.936	365	365	0	4.6833				1615	0	0	0	---	sp|P13746|1A11_HUMAN HLA class I histocompatibility antigen, A-11 alpha chain OS=Homo sapiens OX=9606 GN=HLA-A PE=1 SV=1	---	0	1	---	---	---	---	---	.	12.4551	12.4297	12.1561	12.0624	11.7155	11.5659	12.0544	11.6626	11.987	14.1161	-0.00887249	-0.102559
sp|Q8NF37|PCAT1_HUMAN	sp|Q8NF37|PCAT1_HUMAN	sp|Q8NF37|PCAT1_HUMAN	__Other	sp|Q8NF37|PCAT1_HUMAN	14	14	14	1	14	14	14	29.4	29.4	29.4	59.151	534	534	0	112.05				5358	0	0	0	PCAT1_HUMAN Q8NF37	sp|Q8NF37|PCAT1_HUMAN Lysophosphatidylcholine acyltransferase 1 OS=Homo sapiens OX=9606 GN=LPCAT1 PE=1 SV=2	79888	1	0	LPCAT1	AGPAT10 AGPAT9 AYTL2 LPCAT-1 PFAAP3 lpcat lysoPAFAT	protein-coding	5p15.33	lysophosphatidylcholine acyltransferase 1	.	17.9269	17.0441	16.4831	18.6751	16.8123	16.3111	16.0889	17.202	17.1692	16.4949	-0.421511	1.7705
sp|O94907|DKK1_HUMAN;sp|Q9UBU2|DKK2_HUMAN	sp|O94907|DKK1_HUMAN;sp|Q9UBU2|DKK2_HUMAN	sp|O94907|DKK1_HUMAN;sp|Q9UBU2|DKK2_HUMAN	__Other	sp|O94907|DKK1_HUMAN	6;1	6;1	6;1	2	6	6	6	22.2	22.2	22.2	28.671	266	266;259	0	9.4943				1053	0	0	0	DKK1_HUMAN O94907 DKK2_HUMAN Q9UBU2	sp|O94907|DKK1_HUMAN Dickkopf-related protein 1 OS=Homo sapiens OX=9606 GN=DKK1 PE=1 SV=1	22943 27123	2	5	DKK1 DKK2	DKK-1 SK DKK-2	protein-coding	10q21.1!4q25	dickkopf WNT signaling pathway inhibitor 1 ||| Dickkopf-related protein 1 ||| dickkopf WNT signaling pathway inhibitor 2 ||| Dickkopf-related protein 2	.	13.903	14.3952	15.2625	14.6379	14.5225	12.9084	13.9659	13.6706	13.518	15.0767	1.0672	0.442603
sp|O75570|RF1M_HUMAN	sp|O75570|RF1M_HUMAN	sp|O75570|RF1M_HUMAN	__Other	sp|O75570|RF1M_HUMAN	2	2	2	1	2	2	2	7.6	7.6	7.6	52.305	445	445	0	4.2958				922	0	0	0	RF1M_HUMAN O75570	sp|O75570|RF1M_HUMAN Peptide chain release factor 1, mitochondrial OS=Homo sapiens OX=9606 GN=MTRF1 PE=1 SV=2	9617	1	0	MTRF1	MRF1 MTTRF1 RF1	protein-coding	13q14.11	mitochondrial translation release factor 1 ||| Peptide chain release factor 1, mitochondrial	.	12.4571	12.6402	10.4365	12.7995	11.5676	10.5826	10.4132	11.0935	10.4893	10.9415	-0.60394	1.75901
sp|Q9ULE0|WWC3_HUMAN	sp|Q9ULE0|WWC3_HUMAN	sp|Q9ULE0|WWC3_HUMAN	__Other	sp|Q9ULE0|WWC3_HUMAN	3	3	3	1	3	3	3	3.6	3.6	3.6	122.67	1092	1092	0	7.2696				8071	0	0	0	WWC3_HUMAN Q9ULE0	sp|Q9ULE0|WWC3_HUMAN Protein WWC3 OS=Homo sapiens OX=9606 GN=WWC3 PE=1 SV=3	55841	1	0	WWC3	BM042	protein-coding	Xp22.2	WWC family member 3 ||| Protein WWC3	.		10.0678	10.891	10.0027	11.2181	10.3084	8.56059	9.70365	9.69221	9.87345	0.85972	-0.0285504
sp|Q53GG5|PDLI3_HUMAN	sp|Q53GG5|PDLI3_HUMAN	sp|Q53GG5|PDLI3_HUMAN	__Other	sp|Q53GG5|PDLI3_HUMAN	2	2	2	1	2	2	2	9.1	9.1	9.1	39.232	364	364	0	11.858				4022	0	0	0	PDLI3_HUMAN Q53GG5	sp|Q53GG5|PDLI3_HUMAN PDZ and LIM domain protein 3 OS=Homo sapiens OX=9606 GN=PDLIM3 PE=1 SV=1	27295	1	0	PDLIM3	ALP	protein-coding	4q35.1	PDZ and LIM domain 3 ||| PDZ and LIM domain protein 3	.	13.2361	13.0171	12.497	13.4407	13.9576	11.7974	12.8907	12.361	12.0606	13.8309	-0.357473	0.586251
sp|Q86UX7|URP2_HUMAN	sp|Q86UX7|URP2_HUMAN	sp|Q86UX7|URP2_HUMAN	__Other	sp|Q86UX7|URP2_HUMAN	11	11	11	1	11	11	11	26.5	26.5	26.5	75.952	667	667	0	41.281				4817	0	0	0	URP2_HUMAN Q86UX7	sp|Q86UX7|URP2_HUMAN Fermitin family homolog 3 OS=Homo sapiens OX=9606 GN=FERMT3 PE=1 SV=1	83706	1	0	FERMT3	KIND3 MIG-2 MIG2B UNC112C URP2 URP2SF	protein-coding	11q13.1	fermitin family member 3 ||| Fermitin family homolog 3	.	14.2881	14.8005	14.4198	13.997	14.4283	13.9584	13.5874	14.6467	16.2248	15.0061	-0.113789	-0.536565
sp|O14683|P5I11_HUMAN	sp|O14683|P5I11_HUMAN	sp|O14683|P5I11_HUMAN	__Other	sp|O14683|P5I11_HUMAN	3	3	3	1	3	3	3	13.8	13.8	13.8	21.054	189	189	0	31.226				411	0	0	0	P5I11_HUMAN O14683	sp|O14683|P5I11_HUMAN Tumor protein p53-inducible protein 11 OS=Homo sapiens OX=9606 GN=TP53I11 PE=1 SV=2	9537	1	0	TP53I11	PIG11	protein-coding	11p11.2	tumor protein p53 inducible protein 11 ||| Tumor protein p53-inducible protein 11	.	15.3395	14.5299	15.064	15.8759	13.9523	14.231	14.5819	13.9519	13.1638	14.2838	0.675892	1.4878
sp|O75326|SEM7A_HUMAN	sp|O75326|SEM7A_HUMAN	sp|O75326|SEM7A_HUMAN	__Other	sp|O75326|SEM7A_HUMAN	19	19	19	1	19	19	19	35.9	35.9	35.9	74.823	666	666	0	131.73				864	0	0	0	SEM7A_HUMAN O75326	sp|O75326|SEM7A_HUMAN Semaphorin-7A OS=Homo sapiens OX=9606 GN=SEMA7A PE=1 SV=1	8482	1	0	SEMA7A	CD108 CDw108 H-SEMA-K1 H-Sema-L JMH SEMAK1 SEMAL	protein-coding	15q24.1	semaphorin 7A (John Milton Hagen blood group) ||| Semaphorin-7A	.	16.166	16.7386	18.0757	16.529	15.9486	15.7337	15.7598	17.0262	16.2277	17.0964	1.52607	-0.0206447
sp|P78310|CXAR_HUMAN	sp|P78310|CXAR_HUMAN	sp|P78310|CXAR_HUMAN	__Other	sp|P78310|CXAR_HUMAN	10	10	10	1	10	10	10	37.8	37.8	37.8	40.029	365	365	0	93.73				2936	0	0	0	CXAR_HUMAN P78310	sp|P78310|CXAR_HUMAN Coxsackievirus and adenovirus receptor OS=Homo sapiens OX=9606 GN=CXADR PE=1 SV=1	1525	1	0	CXADR	CAR CAR4/6 HCAR	protein-coding	21q21.1	CXADR Ig-like cell adhesion molecule ||| Coxsackievirus and adenovirus receptor	.	15.768	15.8461	15.8363	15.4188	14.2484	15.2545	17.118	16.0373	15.4199	15.8507	0.188343	-0.229226
sp|P48163|MAOX_HUMAN	sp|P48163|MAOX_HUMAN	sp|P48163|MAOX_HUMAN	__Other	sp|P48163|MAOX_HUMAN	26	26	26	1	26	26	26	55.4	55.4	55.4	64.149	572	572	0	317.55				2364	0	0	0	MAOX_HUMAN P48163	sp|P48163|MAOX_HUMAN NADP-dependent malic enzyme OS=Homo sapiens OX=9606 GN=ME1 PE=1 SV=1	4199	1	0	ME1	HUMNDME MES	protein-coding	6q14.2	malic enzyme 1 ||| NADP-dependent malic enzyme	.	17.7022	17.9099	17.7168	18.0208	18.4265	19.122	16.3066	17.5843	17.6981	17.4567	-0.0746756	0.229356
sp|Q969P6|TOP1M_HUMAN	sp|Q969P6|TOP1M_HUMAN	sp|Q969P6|TOP1M_HUMAN	__Other	sp|Q969P6|TOP1M_HUMAN	5	1	1	1	5	1	1	9	3.3	3.3	69.871	601	601	0.0007516	2.2453				5837	0	0	0	TOP1M_HUMAN Q969P6	sp|Q969P6|TOP1M_HUMAN DNA topoisomerase I, mitochondrial OS=Homo sapiens OX=9606 GN=TOP1MT PE=1 SV=1	116447	1	0	TOP1MT	---	protein-coding	8q24.3	DNA topoisomerase I mitochondrial ||| DNA topoisomerase I, mitochondrial	.		7.95611	8.35378	7.61088	8.31734	8.34944	10.0884	7.45768	7.84864	8.20272	0.0751641	-0.667736
sp|Q14699|RFTN1_HUMAN	sp|Q14699|RFTN1_HUMAN	sp|Q14699|RFTN1_HUMAN	__Other	sp|Q14699|RFTN1_HUMAN	17	17	17	1	17	17	17	33.9	33.9	33.9	63.145	578	578	0	97.835				3605	0	0	0	RFTN1_HUMAN Q14699	sp|Q14699|RFTN1_HUMAN Raftlin OS=Homo sapiens OX=9606 GN=RFTN1 PE=1 SV=4	23180	1	0	RFTN1	MIG2 PIB10 PIG9 RAFTLIN	protein-coding	3p24.3	raftlin, lipid raft linker 1 ||| Raftlin	.	15.5323	16.5881	17.2298	15.651	16.4507	15.9533	15.325	15.4986	17.0047	17.3321	0.924174	-0.65467
sp|P14923|PLAK_HUMAN	sp|P14923|PLAK_HUMAN	sp|P14923|PLAK_HUMAN	__Other	sp|P14923|PLAK_HUMAN	35	35	32	1	35	35	32	63.5	63.5	61.1	81.744	745	745	0	323.31				1652	0	0	0	PLAK_HUMAN P14923	sp|P14923|PLAK_HUMAN Junction plakoglobin OS=Homo sapiens OX=9606 GN=JUP PE=1 SV=3	3728	1	0	JUP	CTNNG DP3 DPIII PDGB PKGB	protein-coding	17q21.2	junction plakoglobin	.	18.9639	18.67	18.4611	19.3416	18.5876	19.164	17.7092	19.8127	17.9419	17.5992	-0.116073	0.764397
sp|Q9NPH2|INO1_HUMAN	sp|Q9NPH2|INO1_HUMAN	sp|Q9NPH2|INO1_HUMAN	__Other	sp|Q9NPH2|INO1_HUMAN	13	13	13	1	13	13	13	28.5	28.5	28.5	61.067	558	558	0	35.113				7322	0	0	0	INO1_HUMAN Q9NPH2	sp|Q9NPH2|INO1_HUMAN Inositol-3-phosphate synthase 1 OS=Homo sapiens OX=9606 GN=ISYNA1 PE=1 SV=1	51477	1	0	ISYNA1	INO1 INOS IPS IPS-1	protein-coding	19p13.11	inositol-3-phosphate synthase 1	.	15.852	16.1889	15.1193	15.7554	15.6639	15.4797	17.7872	16.2477	16.1123	15.7015	-0.864045	-0.228005
sp|Q9ULG6|CCPG1_HUMAN;REV__sp|Q96CN9|GCC1_HUMAN	sp|Q9ULG6|CCPG1_HUMAN;REV__sp|Q96CN9|GCC1_HUMAN	sp|Q9ULG6|CCPG1_HUMAN;REV__sp|Q96CN9|GCC1_HUMAN	__REV	sp|Q9ULG6|CCPG1_HUMAN	6;1	6;1	6;1	2	6	6	6	8.5	8.5	8.5	87.339	757	757;775	0	33.569				8074	0	0	0	CCPG1_HUMAN Q9ULG6 GCC1_HUMAN Q96CN9	sp|Q9ULG6|CCPG1_HUMAN Cell cycle progression protein 1 OS=Homo sapiens OX=9606 GN=CCPG1 PE=1 SV=3	9236 79571	2	5	CCPG1 GCC1	CPR8 GCC1P GCC88	protein-coding	15q21.3!7q32.1	cell cycle progression 1 ||| Cell cycle progression protein 1 ||| GRIP and coiled-coil domain containing 1 ||| GRIP and coiled-coil domain-containing protein 1	.	14.0116	14.0875	14.1614	13.379	15.7089	13.3017	13.2222	13.5446	13.9068	13.7548	0.288947	-0.493401
sp|P62328|TYB4_HUMAN	sp|P62328|TYB4_HUMAN	sp|P62328|TYB4_HUMAN	__Other	sp|P62328|TYB4_HUMAN	6	4	4	1	6	4	4	56.8	54.5	54.5	5.0526	44	44	0	38.468				2855	0	0	0	TYB4_HUMAN P62328	sp|P62328|TYB4_HUMAN Thymosin beta-4 OS=Homo sapiens OX=9606 GN=TMSB4X PE=1 SV=2	7114	1	0	TMSB4X	FX PTMB4 TB4X TMSB4	protein-coding	Xp22.2	thymosin beta 4 X-linked ||| Thymosin beta-4	.	17.1471	16.7774	18.0647	17.06	17.0393	15.9895	16.3661	17.411	15.9028	15.8691	1.35188	0.347163
sp|Q99959|PKP2_HUMAN	sp|Q99959|PKP2_HUMAN	sp|Q99959|PKP2_HUMAN	__Other	sp|Q99959|PKP2_HUMAN	25	25	25	1	25	25	25	30	30	30	97.414	881	881	0	141.71				6470	0	0	0	PKP2_HUMAN Q99959	sp|Q99959|PKP2_HUMAN Plakophilin-2 OS=Homo sapiens OX=9606 GN=PKP2 PE=1 SV=2	5318	1	0	PKP2	ARVD9	protein-coding	12p11.21	plakophilin 2 ||| Plakophilin-2	.	17.8571	17.5388	18.532	17.9524	16.8322	17.9974	16.9848	18.1898	16.3837	16.7274	1.08201	0.502437
sp|O60462|NRP2_HUMAN	sp|O60462|NRP2_HUMAN	sp|O60462|NRP2_HUMAN	__Other	sp|O60462|NRP2_HUMAN	17	17	17	1	17	17	17	23.2	23.2	23.2	104.83	931	931	0	63.184				741	0	0	0	NRP2_HUMAN O60462	sp|O60462|NRP2_HUMAN Neuropilin-2 OS=Homo sapiens OX=9606 GN=NRP2 PE=1 SV=3	8828	1	0	NRP2	NP2 NPN2 PRO2714 VEGF165R2	protein-coding	2q33.3	neuropilin 2 ||| Neuropilin-2	.	17.0909	16.6334	16.297	17.1266	16.734	15.8989	15.265	17.5362	17.2954	15.8367	-0.201723	0.627906
sp|O14832|PAHX_HUMAN	sp|O14832|PAHX_HUMAN	sp|O14832|PAHX_HUMAN	__Other	sp|O14832|PAHX_HUMAN	6	6	6	1	6	6	6	19.5	19.5	19.5	38.538	338	338	0	8.4379				438	0	0	0	PAHX_HUMAN O14832	sp|O14832|PAHX_HUMAN Phytanoyl-CoA dioxygenase, peroxisomal OS=Homo sapiens OX=9606 GN=PHYH PE=1 SV=1	5264	1	0	PHYH	LN1 LNAP1 PAHX PHYH1 RD	protein-coding	10p13	phytanoyl-CoA 2-hydroxylase ||| Phytanoyl-CoA dioxygenase, peroxisomal	.	15.7423	15.2719	15.4146	14.0711	16.5351	14.7529	16.0487	14.6175	14.8726	14.9568	0.255909	-1.08753
sp|P31947|1433S_HUMAN	sp|P31947|1433S_HUMAN	sp|P31947|1433S_HUMAN	__Other	sp|P31947|1433S_HUMAN	23	20	19	1	23	20	19	77	69.8	66.9	27.774	248	248	0	187.81				2083	0	0	0	1433S_HUMAN P31947	sp|P31947|1433S_HUMAN 14-3-3 protein sigma OS=Homo sapiens OX=9606 GN=SFN PE=1 SV=1	2810	1	0	SFN	YWHAS	protein-coding	1p36.11	stratifin ||| 14-3-3 protein sigma	.	19.0659	18.5417	18.6465	19.4526	17.9362	19.5266	18.1647	18.8387	17.7955	17.2785	0.191575	0.997719
sp|P19021|AMD_HUMAN	sp|P19021|AMD_HUMAN	sp|P19021|AMD_HUMAN	__Other	sp|P19021|AMD_HUMAN	11	11	11	1	11	11	11	14.3	14.3	14.3	108.33	973	973	0	52.18				1769	0	0	0	AMD_HUMAN P19021	sp|P19021|AMD_HUMAN Peptidyl-glycine alpha-amidating monooxygenase OS=Homo sapiens OX=9606 GN=PAM PE=1 SV=2	5066	1	0	PAM	PAL PHM	protein-coding	5q21.1	peptidylglycine alpha-amidating monooxygenase ||| Peptidyl-glycine alpha-amidating monooxygenase	.	15.5085	15.6834	17.0554	15.3217	15.9533	14.4295	14.7582	15.7102	15.263	15.269	1.58538	-0.148328
sp|O43516|WIPF1_HUMAN	sp|O43516|WIPF1_HUMAN	sp|O43516|WIPF1_HUMAN	__Other	sp|O43516|WIPF1_HUMAN	1	1	1	1	1	1	1	9.3	9.3	9.3	51.258	503	503	0	6.989				634	0	0	0	WIPF1_HUMAN O43516	sp|O43516|WIPF1_HUMAN WAS/WASL-interacting protein family member 1 OS=Homo sapiens OX=9606 GN=WIPF1 PE=1 SV=3	7456	1	0	WIPF1	PRPL-2 WAS2 WASPIP WIP	protein-coding	2q31.1	WAS/WASL interacting protein family member 1 ||| WAS/WASL-interacting protein family member 1	.		8.41557	9.10718	8.37006	9.45707		7.25628	8.26136	9.12796	9.75514	0.345034	-0.39209
sp|Q13423|NNTM_HUMAN	sp|Q13423|NNTM_HUMAN	sp|Q13423|NNTM_HUMAN	__Other	sp|Q13423|NNTM_HUMAN	40	40	40	1	40	40	40	37.2	37.2	37.2	113.89	1086	1086	0	323.31				3384	0	0	0	NNTM_HUMAN Q13423	sp|Q13423|NNTM_HUMAN NAD(P) transhydrogenase, mitochondrial OS=Homo sapiens OX=9606 GN=NNT PE=1 SV=3	23530	1	0	NNT	GCCD4	protein-coding	5p12	nicotinamide nucleotide transhydrogenase ||| NAD(P) transhydrogenase, mitochondrial	.	19.8057	18.9404	18.8284	19.9965	19.7527	18.8159	17.4871	19.0512	18.6152	18.2221	-0.0177386	1.15039
sp|Q6UW78|UQCC3_HUMAN	sp|Q6UW78|UQCC3_HUMAN	sp|Q6UW78|UQCC3_HUMAN	__Other	sp|Q6UW78|UQCC3_HUMAN	4	4	4	1	4	4	4	47.3	47.3	47.3	10.081	93	93	0	59.862				4509	0	0	0	UQCC3_HUMAN Q6UW78	sp|Q6UW78|UQCC3_HUMAN Ubiquinol-cytochrome-c reductase complex assembly factor 3 OS=Homo sapiens OX=9606 GN=UQCC3 PE=1 SV=2	790955	1	0	UQCC3	C11orf83 CCDS41658.1 MC3DN9 UNQ655	protein-coding	11q12.3	ubiquinol-cytochrome c reductase complex assembly factor 3 ||| Ubiquinol-cytochrome-c reductase complex assembly factor 3	.	14.5329	14.36	13.5473	14.798	14.531	14.6966	13.3279	15.3829	13.2845	13.5973	-0.598344	0.652325
sp|Q9NT68|TEN2_HUMAN;sp|Q9P273|TEN3_HUMAN	sp|Q9P273|TEN3_HUMAN;sp|Q9NT68|TEN2_HUMAN	sp|Q9NT68|TEN2_HUMAN;sp|Q9P273|TEN3_HUMAN	__Other	sp|Q9P273|TEN3_HUMAN	27;1	27;1	27;1	2	27	27	27	14.9	14.9	14.9	300.95	2699	2699;2774	0	79.082				7766	0	0	0	TEN2_HUMAN Q9NT68 TEN3_HUMAN Q9P273	sp|Q9P273|TEN3_HUMAN Teneurin-3 OS=Homo sapiens OX=9606 GN=TENM3 PE=2 SV=3	57451 55714	2	5	TENM2 TENM3	ODZ2 TEN-M2 TEN2 TNM2 ten-2 MCOPCB9 MCOPS15 ODZ3 TEN3 TNM3 Ten-m3 ten-3	protein-coding	5q34!4q34.3-q35.1	teneurin transmembrane protein 2 ||| Teneurin-2 ||| teneurin transmembrane protein 3 ||| Teneurin-3	.	15.7677	16.6521	17.8438	15.9634	15.7933	15.8226	16.2153	16.6847	15.7995	17.419	1.40109	-0.479258
sp|P05362|ICAM1_HUMAN	sp|P05362|ICAM1_HUMAN	sp|P05362|ICAM1_HUMAN	__Other	sp|P05362|ICAM1_HUMAN	18	18	18	1	18	18	18	37.2	37.2	37.2	57.825	532	532	0	152.18				1355	0	0	0	ICAM1_HUMAN P05362	sp|P05362|ICAM1_HUMAN Intercellular adhesion molecule 1 OS=Homo sapiens OX=9606 GN=ICAM1 PE=1 SV=2	3383	1	0	ICAM1	BB2 CD54 P3.58	protein-coding	19p13.2	intercellular adhesion molecule 1	.	16.9541	17.322	17.4808	17.086	15.9975	16.2779	18.4708	16.7163	17.6528	17.4376	0.340804	-0.0539913
sp|P98155|VLDLR_HUMAN	sp|P98155|VLDLR_HUMAN	sp|P98155|VLDLR_HUMAN	__Other	sp|P98155|VLDLR_HUMAN	8	8	8	1	8	8	8	10.4	10.4	10.4	96.098	873	873	0	14.152				3019	0	0	0	VLDLR_HUMAN P98155	sp|P98155|VLDLR_HUMAN Very low-density lipoprotein receptor OS=Homo sapiens OX=9606 GN=VLDLR PE=1 SV=1	7436	1	0	VLDLR	CAMRQ1 CARMQ1 CHRMQ1 VLDL-R VLDLRCH	protein-coding	9p24.2	very low density lipoprotein receptor ||| Very low-density lipoprotein receptor	.	13.6926	13.5345	14.1266	14.2571	13.5609	12.1702	12.5462	14.155	13.9032	13.0139	0.659954	0.790433
sp|P59780|AP3S2_HUMAN	sp|P59780|AP3S2_HUMAN	sp|P59780|AP3S2_HUMAN	__Other	sp|P59780|AP3S2_HUMAN	3	3	3	1	3	3	3	15	15	15	22.017	193	193	0	7.3825				2745	0	0	0	AP3S2_HUMAN P59780	sp|P59780|AP3S2_HUMAN AP-3 complex subunit sigma-2 OS=Homo sapiens OX=9606 GN=AP3S2 PE=2 SV=1	10239	1	0	AP3S2	AP3S3 sigma3b	protein-coding	15q26.1	adaptor related protein complex 3 subunit sigma 2 ||| AP-3 complex subunit sigma-2	.	12.297	12.8308	12.4278	12.5618	11.4529	13.6497	13.7583	11.789	12.7433	12.6552	-0.201927	-0.0679659
sp|P10316|1A69_HUMAN	sp|P10316|1A69_HUMAN	sp|P10316|1A69_HUMAN	__Other	sp|P10316|1A69_HUMAN	27	10	0	1	27	10	0	60.5	27.1	0	40.976	365	365	0	55.085				1524	0	0	0	---	sp|P10316|1A69_HUMAN HLA class I histocompatibility antigen, A-69 alpha chain OS=Homo sapiens OX=9606 GN=HLA-A PE=1 SV=2	---	0	1	---	---	---	---	---	.	17.2367	16.8908	17.1962	17.564	18.0955	16.1482	15.8752	16.709	15.9441	16.6616	0.421986	0.789731
sp|Q6ZVX7|FBX50_HUMAN	sp|Q6ZVX7|FBX50_HUMAN	sp|Q6ZVX7|FBX50_HUMAN	__Other	sp|Q6ZVX7|FBX50_HUMAN	1	1	1	1	1	1	1	6.9	6.9	6.9	30.847	275	275	0.00062949	2.4164				4590	0	0	0	FBX50_HUMAN Q6ZVX7	sp|Q6ZVX7|FBX50_HUMAN F-box only protein 50 OS=Homo sapiens OX=9606 GN=NCCRP1 PE=1 SV=1	342897	1	0	NCCRP1	FBXO50 NCCRP-1	protein-coding	19q13.2	NCCRP1, F-box associated domain containing ||| F-box only protein 50	.		9.21827	8.53447	9.52784	8.63534	9.97277	8.76211	7.46403	8.33791	8.01851	-0.122152	0.871218
sp|P78337|PITX1_HUMAN;sp|Q99697|PITX2_HUMAN	sp|P78337|PITX1_HUMAN;sp|Q99697|PITX2_HUMAN	sp|P78337|PITX1_HUMAN;sp|Q99697|PITX2_HUMAN	__Other	sp|P78337|PITX1_HUMAN	4;1	4;1	4;1	2	4	4	4	22.6	22.6	22.6	34.128	314	314;317	0	10.818				2945	0	0	0	PITX1_HUMAN P78337 PITX2_HUMAN Q99697	sp|P78337|PITX1_HUMAN Pituitary homeobox 1 OS=Homo sapiens OX=9606 GN=PITX1 PE=1 SV=2	5307 5308	2	5	PITX1 PITX2	BFT CCF LBNBG POTX PTX1 ARP1 ASGD4 Brx1 IDG2 IGDS IGDS2 IHG2 IRID2 Otlx2 PTX2 RGS RIEG RIEG1 RS	protein-coding	5q31.1!4q25	paired like homeodomain 1 ||| Pituitary homeobox 1 ||| paired like homeodomain 2 ||| Pituitary homeobox 2	.	13.1396	13.266	12.606	14.0501	13.7509	14.2721	12.0559	12.8243	13.3074	12.5187	-0.567185	0.876975
sp|Q9BZJ4|S2539_HUMAN	sp|Q9BZJ4|S2539_HUMAN	sp|Q9BZJ4|S2539_HUMAN	__Other	sp|Q9BZJ4|S2539_HUMAN	2	2	2	1	2	2	2	6.4	6.4	6.4	39.248	359	359	0.0048561	1.4422				6813	0	0	0	S2539_HUMAN Q9BZJ4	sp|Q9BZJ4|S2539_HUMAN Solute carrier family 25 member 39 OS=Homo sapiens OX=9606 GN=SLC25A39 PE=2 SV=2	51629	1	0	SLC25A39	CGI-69 CGI69	protein-coding	17q21.31	solute carrier family 25 member 39	.	11.0587	12.9141	13.4493	12.3767	13.275	11.3093	13.0637	11.7293	12.9406	13.3146	0.766958	-0.305591
sp|Q9UKA4|AKA11_HUMAN	sp|Q9UKA4|AKA11_HUMAN	sp|Q9UKA4|AKA11_HUMAN	__Other	sp|Q9UKA4|AKA11_HUMAN	6	6	6	1	6	6	6	4.5	4.5	4.5	210.51	1901	1901	0	4.6121				8016	0	0	0	AKA11_HUMAN Q9UKA4	sp|Q9UKA4|AKA11_HUMAN A-kinase anchor protein 11 OS=Homo sapiens OX=9606 GN=AKAP11 PE=1 SV=1	11215	1	0	AKAP11	AKAP-11 AKAP220 PPP1R44 PRKA11	protein-coding	13q14.11	A-kinase anchoring protein 11 ||| A-kinase anchor protein 11	.	13.6973	13.5947	13.7087	13.5116	15.0073	12.4247	12.7647	12.9071	13.1542	13.012	0.397411	0.200302
sp|Q12983|BNIP3_HUMAN	sp|Q12983|BNIP3_HUMAN	sp|Q12983|BNIP3_HUMAN	__Other	sp|Q12983|BNIP3_HUMAN	2	2	2	1	2	2	2	5	5	5	27.832	259	259	0	7.1087				3298	0	0	0	BNIP3_HUMAN Q12983	sp|Q12983|BNIP3_HUMAN BCL2/adenovirus E1B 19 kDa protein-interacting protein 3 OS=Homo sapiens OX=9606 GN=BNIP3 PE=1 SV=3	664	1	0	BNIP3	NIP3	protein-coding	10q26.3	BCL2 interacting protein 3 ||| BCL2/adenovirus E1B 19 kDa protein-interacting protein 3	.	12.0202	12.2153	12.4311	12.8269	12.3825	10.5113	11.6396	12.6237	12.0498	11.1657	0.477263	0.87304
sp|P78559|MAP1A_HUMAN	sp|P78559|MAP1A_HUMAN	sp|P78559|MAP1A_HUMAN	__Other	sp|P78559|MAP1A_HUMAN	23	21	21	1	23	21	21	9.6	8.7	8.7	305.48	2803	2803	0	26.248				2968	0	0	0	MAP1A_HUMAN P78559	sp|P78559|MAP1A_HUMAN Microtubule-associated protein 1A OS=Homo sapiens OX=9606 GN=MAP1A PE=1 SV=6	4130	1	0	MAP1A	MAP1L MTAP1A	protein-coding	15q15.3	microtubule associated protein 1A ||| Microtubule-associated protein 1A	.	16.8196	16.423	16.188	16.5946	17.9118	15.5484	15.7435	15.7149	15.5901	15.8401	0.0466159	0.453133
sp|P51511|MMP15_HUMAN	sp|P51511|MMP15_HUMAN	sp|P51511|MMP15_HUMAN	__Other	sp|P51511|MMP15_HUMAN	2	2	2	1	2	2	2	3	3	3	75.806	669	669	0.0087154	1.0658				2513	0	0	0	MMP15_HUMAN P51511	sp|P51511|MMP15_HUMAN Matrix metalloproteinase-15 OS=Homo sapiens OX=9606 GN=MMP15 PE=1 SV=1	4324	1	0	MMP15	MMP-15 MT2-MMP MT2MMP MTMMP2 SMCP-2	protein-coding	16q21	matrix metallopeptidase 15 ||| Matrix metalloproteinase-15	.	13.5179	13.4204	12.5296	13.2161	13.0276	14.9444	13.1077	13.5334	12.891	12.3715	-0.673027	0.0133962
sp|Q9NVN3|RIC8B_HUMAN	sp|Q9NVN3|RIC8B_HUMAN	sp|Q9NVN3|RIC8B_HUMAN	__Other	sp|Q9NVN3|RIC8B_HUMAN	2	1	1	1	2	1	1	5.6	2.9	2.9	58.824	520	520	0.00087456	2.1586				7526	0	0	0	RIC8B_HUMAN Q9NVN3	sp|Q9NVN3|RIC8B_HUMAN Synembryn-B OS=Homo sapiens OX=9606 GN=RIC8B PE=1 SV=2	55188	1	0	RIC8B	RIC8 hSyn	protein-coding	12q23.3	RIC8 guanine nucleotide exchange factor B ||| Synembryn-B	.		8.97203	9.05875	7.32161	9.74438	9.60407	9.24298	8.17213	8.64438	8.73437	0.243412	-1.49373
sp|Q9UIG8|SO3A1_HUMAN	sp|Q9UIG8|SO3A1_HUMAN	sp|Q9UIG8|SO3A1_HUMAN	__Other	sp|Q9UIG8|SO3A1_HUMAN	2	2	2	1	2	2	2	2.5	2.5	2.5	76.552	710	710	0.0070845	1.2173				7963	0	0	0	SO3A1_HUMAN Q9UIG8	sp|Q9UIG8|SO3A1_HUMAN Solute carrier organic anion transporter family member 3A1 OS=Homo sapiens OX=9606 GN=SLCO3A1 PE=1 SV=3	28232	1	0	SLCO3A1	OATP-D OATP-RP3 OATP3A1 OATPD OATPRP3 SLC21A11	protein-coding	15q26.1	solute carrier organic anion transporter family member 3A1	.	11.9292	12.5914	12.9909	12.949	13.6238	12.0438	12.1233	12.8755	11.2457	11.6863	0.548608	0.506678
sp|P21266|GSTM3_HUMAN	sp|P21266|GSTM3_HUMAN	sp|P21266|GSTM3_HUMAN	__Other	sp|P21266|GSTM3_HUMAN	20	20	19	1	20	20	19	68.4	68.4	64.4	26.559	225	225	0	69.232				1821	0	0	0	GSTM3_HUMAN P21266	sp|P21266|GSTM3_HUMAN Glutathione S-transferase Mu 3 OS=Homo sapiens OX=9606 GN=GSTM3 PE=1 SV=3	2947	1	0	GSTM3	GST5 GSTB GSTM3-3 GTM3	protein-coding	1p13.3	glutathione S-transferase mu 3	.	17.0276	17.4158	17.6187	16.5885	18.0789	18.1993	16.8267	16.1346	17.7465	16.4851	0.408901	-0.62127
sp|Q9UN66|PCDB8_HUMAN;sp|Q9Y5F0|PCDBD_HUMAN	sp|Q9Y5F0|PCDBD_HUMAN;sp|Q9UN66|PCDB8_HUMAN	sp|Q9UN66|PCDB8_HUMAN;sp|Q9Y5F0|PCDBD_HUMAN	__Other	sp|Q9UN66|PCDB8_HUMAN;sp|Q9Y5F0|PCDBD_HUMAN	3;3	3;3	1;1	2	3	3	1	5.1	5.1	1.4	87.551	798	798;801	0	4.9681				8125	0	0	0	PCDBD_HUMAN Q9Y5F0 PCDB8_HUMAN Q9UN66	sp|Q9Y5F0|PCDBD_HUMAN Protocadherin beta-13 OS=Homo sapiens OX=9606 GN=PCDHB13 PE=2 SV=1;sp|Q9UN66|PCDB8_HUMAN Protocadherin beta-8 OS=Homo sapiens OX=9606 GN=PCDHB8 PE=2 SV=3	56123 56128	2	2	PCDHB13 PCDHB8	PCDH-BETA13 PCDH-BETA8 PCDH3I	protein-coding	5q31.3	protocadherin beta 13 ||| Protocadherin beta-13 ||| protocadherin beta 8 ||| Protocadherin beta-8	.	13.1008	13.3468	13.5808	13.0594	12.938	12.4378	12.9219	14.9194	12.5541	12.8158	0.427378	-0.0939462
sp|P10620|MGST1_HUMAN	sp|P10620|MGST1_HUMAN	sp|P10620|MGST1_HUMAN	__Other	sp|P10620|MGST1_HUMAN	7	7	7	1	7	7	7	31	31	31	17.598	155	155	0	80.772				1535	0	0	0	MGST1_HUMAN P10620	sp|P10620|MGST1_HUMAN Microsomal glutathione S-transferase 1 OS=Homo sapiens OX=9606 GN=MGST1 PE=1 SV=1	4257	1	0	MGST1	GST12 MGST MGST-I	protein-coding	12p12.3	microsomal glutathione S-transferase 1	.	17.4051	17.3575	17.8281	17.3376	18.1089	18.0289	15.7633	16.554	17.2046	17.1632	0.579529	0.0890351
sp|Q9H773|DCTP1_HUMAN	sp|Q9H773|DCTP1_HUMAN	sp|Q9H773|DCTP1_HUMAN	__Other	sp|Q9H773|DCTP1_HUMAN	9	9	9	1	9	9	9	59.4	59.4	59.4	18.681	170	170	0	102.7				7110	0	0	0	DCTP1_HUMAN Q9H773	sp|Q9H773|DCTP1_HUMAN dCTP pyrophosphatase 1 OS=Homo sapiens OX=9606 GN=DCTPP1 PE=1 SV=1	79077	1	0	DCTPP1	CDA03 RS21C6 XTP3TPA	protein-coding	16p11.2	dCTP pyrophosphatase 1	.	15.2696	16.2969	16.2115	15.3114	15.6996	16.5783	17.7036	15.8823	16.3592	15.2719	0.0843191	-0.815813
sp|Q15746|MYLK_HUMAN	sp|Q15746|MYLK_HUMAN	sp|Q15746|MYLK_HUMAN	__Other	sp|Q15746|MYLK_HUMAN	49	49	49	1	49	49	49	32.4	32.4	32.4	210.71	1914	1914	0	269.16				3791	0	0	0	MYLK_HUMAN Q15746	sp|Q15746|MYLK_HUMAN Myosin light chain kinase, smooth muscle OS=Homo sapiens OX=9606 GN=MYLK PE=1 SV=4	4638	1	0	MYLK	AAT7 KRP MLCK MLCK1 MLCK108 MLCK210 MMIHS MSTP083 MYLK1 smMLCK	protein-coding	3q21.1	myosin light chain kinase ||| Myosin light chain kinase, smooth muscle	.	16.7029	17.6549	18.7944	16.8783	16.6898	16.6886	17.1491	17.6012	17.4824	18.4415	1.32872	-0.587316
sp|P23508|CRCM_HUMAN	sp|P23508|CRCM_HUMAN	sp|P23508|CRCM_HUMAN	__Other	sp|P23508|CRCM_HUMAN	2	2	2	1	2	2	2	3	3	3	93.026	829	829	0	7.374				1882	0	0	0	CRCM_HUMAN P23508	sp|P23508|CRCM_HUMAN Colorectal mutant cancer protein OS=Homo sapiens OX=9606 GN=MCC PE=1 SV=2	4163	1	0	MCC	MCC1	protein-coding	5q22.2	MCC regulator of WNT signaling pathway ||| Colorectal mutant cancer protein	.	13.0506	11.9556	12.0388	10.8553	13.558	11.6771	11.3689	11.6407	11.9398	11.4822	0.218724	-0.964786
sp|O60635|TSN1_HUMAN	sp|O60635|TSN1_HUMAN	sp|O60635|TSN1_HUMAN	__Other	sp|O60635|TSN1_HUMAN	2	2	2	1	2	2	2	7.5	7.5	7.5	26.301	241	241	0	6.0607				766	0	0	0	TSN1_HUMAN O60635	sp|O60635|TSN1_HUMAN Tetraspanin-1 OS=Homo sapiens OX=9606 GN=TSPAN1 PE=1 SV=2	10103	1	0	TSPAN1	NET1 TM4C TM4SF	protein-coding	1p34.1	tetraspanin 1 ||| Tetraspanin-1	.	14.4978	14.638	14.3229	14.4105	13.7083	15.7109	13.9938	15.7675	14.1726	13.9758	-0.184858	-0.0973272
sp|O95084|PRS23_HUMAN	sp|O95084|PRS23_HUMAN	sp|O95084|PRS23_HUMAN	__Other	sp|O95084|PRS23_HUMAN	10	10	10	1	10	10	10	36	36	36	43.001	383	383	0	65.306				1079	0	0	0	PRS23_HUMAN O95084	sp|O95084|PRS23_HUMAN Serine protease 23 OS=Homo sapiens OX=9606 GN=PRSS23 PE=1 SV=1	11098	1	0	PRSS23	SIG13 SPUVE ZSIG13	protein-coding	11q14.2	serine protease 23	.	16.538	15.5877	15.8107	16.9707	15.4797	15.8478	14.5185	15.7859	14.8469	14.7805	0.305628	1.46557
sp|P40261|NNMT_HUMAN	sp|P40261|NNMT_HUMAN	sp|P40261|NNMT_HUMAN	__Other	sp|P40261|NNMT_HUMAN	11	11	11	1	11	11	11	56.4	56.4	56.4	29.574	264	264	0	130.32				2223	0	0	0	NNMT_HUMAN P40261	sp|P40261|NNMT_HUMAN Nicotinamide N-methyltransferase OS=Homo sapiens OX=9606 GN=NNMT PE=1 SV=1	4837	1	0	NNMT	---	protein-coding	11q23.2	nicotinamide N-methyltransferase	.	15.6241	16.5329	17.6075	15.369	16.4751	16.2918	15.8012	15.4919	17.0172	16.9205	1.23569	-1.00275
sp|Q9H425|CA198_HUMAN	sp|Q9H425|CA198_HUMAN	sp|Q9H425|CA198_HUMAN	__Other	sp|Q9H425|CA198_HUMAN	7	7	7	1	7	7	7	28.4	28.4	28.4	36.346	327	327	0	48.825				7026	0	0	0	CA198_HUMAN Q9H425	sp|Q9H425|CA198_HUMAN Uncharacterized protein C1orf198 OS=Homo sapiens OX=9606 GN=C1orf198 PE=1 SV=1	84886	1	0	C1orf198	---	protein-coding	1q42.2	chromosome 1 open reading frame 198 ||| Uncharacterized protein C1orf198	.	13.7865	14.5194	15.3234	13.9059	14.4559	14.8251	12.7313	14.9188	14.2498	14.4124	0.970594	-0.446882
sp|Q01650|LAT1_HUMAN	sp|Q01650|LAT1_HUMAN	sp|Q01650|LAT1_HUMAN	__Other	sp|Q01650|LAT1_HUMAN	10	10	9	1	10	10	9	17.9	17.9	16.6	55.01	507	507	0	144.91				3069	0	0	0	LAT1_HUMAN Q01650	sp|Q01650|LAT1_HUMAN Large neutral amino acids transporter small subunit 1 OS=Homo sapiens OX=9606 GN=SLC7A5 PE=1 SV=2	8140	1	0	SLC7A5	4F2LC CD98 D16S469E E16 LAT1 MPE16	protein-coding	16q24.2	solute carrier family 7 member 5 ||| Large neutral amino acids transporter small subunit 1	.	16.7021	16.7309	15.247	16.9783	16.7269	17.8989	15.8568	16.7687	16.2958	16.6687	-1.30813	0.423121
sp|Q0ZGT2|NEXN_HUMAN	sp|Q0ZGT2|NEXN_HUMAN	sp|Q0ZGT2|NEXN_HUMAN	__Other	sp|Q0ZGT2|NEXN_HUMAN	27	27	27	1	27	27	27	40.1	40.1	40.1	80.657	675	675	0	188.55				3235	0	0	0	NEXN_HUMAN Q0ZGT2	sp|Q0ZGT2|NEXN_HUMAN Nexilin OS=Homo sapiens OX=9606 GN=NEXN PE=1 SV=1	91624	1	0	NEXN	CMH20 NELIN	protein-coding	1p31.1	nexilin F-actin binding protein ||| Nexilin	.	17.1105	17.2343	18.3944	16.9422	17.3894	15.9153	16.2135	16.9227	17.5325	17.482	1.2954	-0.156811
sp|Q9NRZ5|PLCD_HUMAN	sp|Q9NRZ5|PLCD_HUMAN	sp|Q9NRZ5|PLCD_HUMAN	__Other	sp|Q9NRZ5|PLCD_HUMAN	2	2	2	1	2	2	2	5	5	5	44.021	378	378	0.0036635	1.5966				7425	0	0	0	PLCD_HUMAN Q9NRZ5	sp|Q9NRZ5|PLCD_HUMAN 1-acyl-sn-glycerol-3-phosphate acyltransferase delta OS=Homo sapiens OX=9606 GN=AGPAT4 PE=1 SV=1	56895	1	0	AGPAT4	1-AGPAT4 LPAAT-delta dJ473J16.2	protein-coding	6q26	1-acylglycerol-3-phosphate O-acyltransferase 4 ||| 1-acyl-sn-glycerol-3-phosphate acyltransferase delta	.	11.7362	13.3522	14.1621	13.6395	11.6239	12.7064	12.6566	13.5194	13.3857	13.4803	1.01533	0.492747
sp|A8MT65|ZN891_HUMAN;sp|Q9H0M5|ZN700_HUMAN	sp|A8MT65|ZN891_HUMAN;sp|Q9H0M5|ZN700_HUMAN	sp|A8MT65|ZN891_HUMAN;sp|Q9H0M5|ZN700_HUMAN	__Other	sp|A8MT65|ZN891_HUMAN;sp|Q9H0M5|ZN700_HUMAN	3;2	1;1	0;0	2	3	1	0	9	5.5	0	63.591	544	544;742	0	2.9845				254	0	0	0	ZN700_HUMAN Q9H0M5 ZN891_HUMAN A8MT65	sp|A8MT65|ZN891_HUMAN Zinc finger protein 891 OS=Homo sapiens OX=9606 GN=ZNF891 PE=2 SV=2;sp|Q9H0M5|ZN700_HUMAN Zinc finger protein 700 OS=Homo sapiens OX=9606 GN=ZNF700 PE=2 SV=1	90592 101060200	2	5	ZNF700 ZNF891	---	protein-coding	19p13.2!12q24.33	zinc finger protein 700 ||| zinc finger protein 891	.	10.8687	10.9221	10.1316	10.2745	10.432	10.9471	10.7603	12.6185	10.6768	10.4437	-0.653941	-0.51104
sp|Q96SQ9|CP2S1_HUMAN	sp|Q96SQ9|CP2S1_HUMAN	sp|Q96SQ9|CP2S1_HUMAN	__Other	sp|Q96SQ9|CP2S1_HUMAN	9	9	9	1	9	9	9	22.2	22.2	22.2	55.816	504	504	0	57.562				6359	0	0	0	CP2S1_HUMAN Q96SQ9	sp|Q96SQ9|CP2S1_HUMAN Cytochrome P450 2S1 OS=Homo sapiens OX=9606 GN=CYP2S1 PE=1 SV=2	29785	1	0	CYP2S1	CYPIIS1	protein-coding	19q13.2	cytochrome P450 family 2 subfamily S member 1 ||| Cytochrome P450 2S1	.	14.0934	15.6829	15.4147	14.8239	16.3788	14.2508	14.958	15.5199	15.165	16.604	0.0253256	-0.56545
sp|O15438|MRP3_HUMAN	sp|O15438|MRP3_HUMAN	sp|O15438|MRP3_HUMAN	__Other	sp|O15438|MRP3_HUMAN	24	23	23	1	24	23	23	20.5	19.9	19.9	169.34	1527	1527	0	64.517				548	0	0	0	MRP3_HUMAN O15438	sp|O15438|MRP3_HUMAN Canalicular multispecific organic anion transporter 2 OS=Homo sapiens OX=9606 GN=ABCC3 PE=1 SV=3	8714	1	0	ABCC3	ABC31 EST90757 MLP2 MOAT-D MRP3 cMOAT2	protein-coding	17q21.33	ATP binding cassette subfamily C member 3 ||| Canalicular multispecific organic anion transporter 2	.	16.8301	16.2232	15.488	17.3438	16.243	17.1433	15.449	15.3086	16.3735	15.7071	-0.644027	1.21179
sp|Q7Z7L1|SLN11_HUMAN	sp|Q7Z7L1|SLN11_HUMAN	sp|Q7Z7L1|SLN11_HUMAN	__Other	sp|Q7Z7L1|SLN11_HUMAN	7	5	5	1	7	5	5	13.3	11	11	102.83	901	901	0	12.493				4762	0	0	0	SLN11_HUMAN Q7Z7L1	sp|Q7Z7L1|SLN11_HUMAN Schlafen family member 11 OS=Homo sapiens OX=9606 GN=SLFN11 PE=1 SV=2	91607	1	0	SLFN11	SLFN8/9	protein-coding	17q12	schlafen family member 11	.		12.3323	11.8657	11.4625	11.5524	11.5274	12.6228	11.6087	11.6538	13.7039	-0.13392	-0.537135
sp|Q8N205|SYNE4_HUMAN	sp|Q8N205|SYNE4_HUMAN	sp|Q8N205|SYNE4_HUMAN	__Other	sp|Q8N205|SYNE4_HUMAN	1	1	1	1	1	1	1	3.2	3.2	3.2	43.512	404	404	0.0066106	1.2417				5108	0	0	0	SYNE4_HUMAN Q8N205	sp|Q8N205|SYNE4_HUMAN Nesprin-4 OS=Homo sapiens OX=9606 GN=SYNE4 PE=1 SV=2	163183	1	0	SYNE4	C19orf46 DFNB76 KASH4 Nesp4	protein-coding	19q13.12	spectrin repeat containing nuclear envelope family member 4 ||| Nesprin-4	.	11.9755	11.2553	12.1069	11.0093	10.9798	11.2788	9.48206	11.6959	11.3631	11.5456	0.924238	-0.173342
sp|P11234|RALB_HUMAN	sp|P11234|RALB_HUMAN	sp|P11234|RALB_HUMAN	__Other	sp|P11234|RALB_HUMAN	11	4	4	1	11	4	4	52.4	16	16	23.408	206	206	0	20.473				1556	0	0	0	RALB_HUMAN P11234	sp|P11234|RALB_HUMAN Ras-related protein Ral-B OS=Homo sapiens OX=9606 GN=RALB PE=1 SV=1	5899	1	0	RALB	---	protein-coding	2q14.2	RAS like proto-oncogene B ||| Ras-related protein Ral-B	.	16.0042	15.1767	15.0345	16.4321	14.4261	14.794	14.3709	16.0668	14.4671	14.8185	-0.0167781	1.38084
sp|O75874|IDHC_HUMAN	sp|O75874|IDHC_HUMAN	sp|O75874|IDHC_HUMAN	__Other	sp|O75874|IDHC_HUMAN	34	34	31	1	34	34	31	79.5	79.5	73.9	46.659	414	414	0	323.31				969	0	0	0	IDHC_HUMAN O75874	sp|O75874|IDHC_HUMAN Isocitrate dehydrogenase [NADP] cytoplasmic OS=Homo sapiens OX=9606 GN=IDH1 PE=1 SV=2	3417	1	0	IDH1	HEL-216 HEL-S-26 IDCD IDH IDP IDPC PICD	protein-coding	2q34	isocitrate dehydrogenase (NADP(+)) 1 ||| Isocitrate dehydrogenase [NADP] cytoplasmic	.	19.1612	19.1542	18.8854	19.1194	19.0603	20.7521	18.1859	18.7341	18.6351	18.4642	-0.0941744	0.139836
sp|P00750|TPA_HUMAN	sp|P00750|TPA_HUMAN	sp|P00750|TPA_HUMAN	__Other	sp|P00750|TPA_HUMAN	8	8	8	1	8	8	8	15.8	15.8	15.8	62.916	562	562	0	14.681				1257	0	0	0	TPA_HUMAN P00750	sp|P00750|TPA_HUMAN Tissue-type plasminogen activator OS=Homo sapiens OX=9606 GN=PLAT PE=1 SV=1	5327	1	0	PLAT	T-PA TPA	protein-coding	8p11.21	plasminogen activator, tissue type ||| Tissue-type plasminogen activator	.	15.0808	14.6453	14.7657	14.8992	15.6647	13.6756	13.6665	15.5344	13.9911	14.4242	0.188024	0.321507
sp|P07951|TPM2_HUMAN	sp|P07951|TPM2_HUMAN	sp|P07951|TPM2_HUMAN	__Other	sp|P07951|TPM2_HUMAN	42	42	7	1	42	42	7	82.4	82.4	19.4	32.85	284	284	0	296.04				1421	0	0	0	TPM2_HUMAN P07951	sp|P07951|TPM2_HUMAN Tropomyosin beta chain OS=Homo sapiens OX=9606 GN=TPM2 PE=1 SV=1	7169	1	0	TPM2	AMCD1 DA1 DA2B DA2B4 HEL-S-273 NEM4 TMSB	protein-coding	9p13.3	tropomyosin 2 ||| Tropomyosin beta chain	.	19.0614	20.1656	19.618	19.0669	19.9531	19.8152	21.6065	19.1946	19.6482	19.9577	-0.239544	-0.790664
sp|P43121|MUC18_HUMAN	sp|P43121|MUC18_HUMAN	sp|P43121|MUC18_HUMAN	__Other	sp|P43121|MUC18_HUMAN	24	24	24	1	24	24	24	43.2	43.2	43.2	71.607	646	646	0	172.61				2294	0	0	0	MUC18_HUMAN P43121	sp|P43121|MUC18_HUMAN Cell surface glycoprotein MUC18 OS=Homo sapiens OX=9606 GN=MCAM PE=1 SV=2	4162	1	0	MCAM	CD146 HEMCAM METCAM MUC18 MelCAM	protein-coding	11q23.3	melanoma cell adhesion molecule ||| Cell surface glycoprotein MUC18	.	17.6144	17.6496	18.3491	17.7759	16.7413	16.4864	17.2823	16.8636	18.5839	17.9636	0.843337	0.270149
sp|O43520|AT8B1_HUMAN	sp|O43520|AT8B1_HUMAN	sp|O43520|AT8B1_HUMAN	__Other	sp|O43520|AT8B1_HUMAN	7	7	7	1	7	7	7	5.1	5.1	5.1	143.69	1251	1251	0	9.2495				635	0	0	0	AT8B1_HUMAN O43520	sp|O43520|AT8B1_HUMAN Phospholipid-transporting ATPase IC OS=Homo sapiens OX=9606 GN=ATP8B1 PE=1 SV=3	5205	1	0	ATP8B1	ATPIC BRIC FIC1 ICP1 PFIC PFIC1	protein-coding	18q21.31	ATPase phospholipid transporting 8B1 ||| Phospholipid-transporting ATPase IC	.	14.8393	15.0756	16.3046	15.2684	15.3502	14.8092	13.9827	15.157	14.3092	14.0901	1.39564	0.359462
sp|Q15131|CDK10_HUMAN	sp|Q15131|CDK10_HUMAN	sp|Q15131|CDK10_HUMAN	__Other	sp|Q15131|CDK10_HUMAN	3	3	3	1	3	3	3	7.8	7.8	7.8	41.038	360	360	0.0052134	1.3846				3691	0	0	0	CDK10_HUMAN Q15131	sp|Q15131|CDK10_HUMAN Cyclin-dependent kinase 10 OS=Homo sapiens OX=9606 GN=CDK10 PE=1 SV=1	8558	1	0	CDK10	ALSAS PISSLRE	protein-coding	16q24.3	cyclin dependent kinase 10 ||| Cyclin-dependent kinase 10	.	11.2384	11.7529	11.1196	11.2932	11.6955	11.8454	13.3411	11.2716	11.346	10.8193	-0.471831	-0.298237
sp|Q5VSY0|GKAP1_HUMAN	sp|Q5VSY0|GKAP1_HUMAN	sp|Q5VSY0|GKAP1_HUMAN	__Other	sp|Q5VSY0|GKAP1_HUMAN	2	2	2	1	2	2	2	6.3	6.3	6.3	42.078	366	366	0	3.5462				4224	0	0	0	GKAP1_HUMAN Q5VSY0	sp|Q5VSY0|GKAP1_HUMAN G kinase-anchoring protein 1 OS=Homo sapiens OX=9606 GN=GKAP1 PE=1 SV=2	80318	1	0	GKAP1	FKSG21 GKAP42	protein-coding	9q21.32	G kinase anchoring protein 1 ||| G kinase-anchoring protein 1	.		9.64719	10.2916	8.68712	9.75416	8.87503	10.3739	8.90792	9.21845	10.6576	0.695898	-0.908596
sp|P15407|FOSL1_HUMAN	sp|P15407|FOSL1_HUMAN	sp|P15407|FOSL1_HUMAN	__Other	sp|P15407|FOSL1_HUMAN	10	10	10	1	10	10	10	43.9	43.9	43.9	29.413	271	271	0	78.326				1667	0	0	0	FOSL1_HUMAN P15407	sp|P15407|FOSL1_HUMAN Fos-related antigen 1 OS=Homo sapiens OX=9606 GN=FOSL1 PE=1 SV=1	8061	1	0	FOSL1	FRA FRA1 fra-1	protein-coding	11q13.1	FOS like 1, AP-1 transcription factor subunit ||| Fos-related antigen 1	.	16.5211	16.2162	16.1613	16.9257	16.3955	14.9504	14.9346	16.6144	15.2591	16.1843	0.2331	0.997574
sp|Q96M94|KLH15_HUMAN	sp|Q96M94|KLH15_HUMAN	sp|Q96M94|KLH15_HUMAN	__Other	sp|Q96M94|KLH15_HUMAN	1	1	1	1	1	1	1	1.7	1.7	1.7	69.774	604	604	0.0060416	1.329				6231	0	0	0	KLH15_HUMAN Q96M94	sp|Q96M94|KLH15_HUMAN Kelch-like protein 15 OS=Homo sapiens OX=9606 GN=KLHL15 PE=1 SV=2	80311	1	0	KLHL15	HEL-S-305	protein-coding	Xp22.11	kelch like family member 15 ||| Kelch-like protein 15	.	12.0557	11.8713	13.1798	12.2961	12.3909	11.9044	10.7414	12.5788	11.211	11.8771	1.15734	0.273647
sp|Q9H3R2|MUC13_HUMAN	sp|Q9H3R2|MUC13_HUMAN	sp|Q9H3R2|MUC13_HUMAN	__Other	sp|Q9H3R2|MUC13_HUMAN	1	1	1	1	1	1	1	2	2	2	54.603	512	512	0.0029528	1.7939				7018	0	0	0	MUC13_HUMAN Q9H3R2	sp|Q9H3R2|MUC13_HUMAN Mucin-13 OS=Homo sapiens OX=9606 GN=MUC13 PE=1 SV=3	56667	1	0	MUC13	DRCC1 MUC-13	protein-coding	3q21.2	mucin 13, cell surface associated ||| Mucin-13	.		10.7647	10.3023	10.1226	10.089	12.3865	10.569	10.3842	10.6255	9.97469	-0.254376	-0.43414
sp|P41732|TSN7_HUMAN	sp|P41732|TSN7_HUMAN	sp|P41732|TSN7_HUMAN	__Other	sp|P41732|TSN7_HUMAN	1	1	1	1	1	1	1	6	6	6	27.574	249	249	0	3.0924				2257	0	0	0	TSN7_HUMAN P41732	sp|P41732|TSN7_HUMAN Tetraspanin-7 OS=Homo sapiens OX=9606 GN=TSPAN7 PE=1 SV=2	7102	1	0	TSPAN7	A15 CCG-B7 CD231 DXS1692E MRX58 MXS1 TALLA-1 TM4SF2 TM4SF2b	protein-coding	Xp11.4	tetraspanin 7 ||| Tetraspanin-7	.	11.4407	12.1961	11.9125	12.5298	13.4879	12.278	11.8654	11.0323	11.9484	11.1884	-0.117835	0.499477
sp|P54687|BCAT1_HUMAN	sp|P54687|BCAT1_HUMAN	sp|P54687|BCAT1_HUMAN	__Other	sp|P54687|BCAT1_HUMAN	11	11	11	1	11	11	11	30.3	30.3	30.3	42.966	386	386	0	70.335				2644	0	0	0	BCAT1_HUMAN P54687	sp|P54687|BCAT1_HUMAN Branched-chain-amino-acid aminotransferase, cytosolic OS=Homo sapiens OX=9606 GN=BCAT1 PE=1 SV=3	586	1	0	BCAT1	BCATC BCT1 ECA39 MECA39 PNAS121 PP18	protein-coding	12p12.1	branched chain amino acid transaminase 1 ||| Branched-chain-amino-acid aminotransferase, cytosolic	.	15.6331	16.6453	17.4755	15.942	16.5474	15.5451	15.2325	16.29	16.3805	17.2509	1.1425	-0.390984
sp|O43854|EDIL3_HUMAN	sp|O43854|EDIL3_HUMAN	sp|O43854|EDIL3_HUMAN	__Other	sp|O43854|EDIL3_HUMAN	15	15	15	1	15	15	15	37.3	37.3	37.3	53.764	480	480	0	65.568				697	0	0	0	EDIL3_HUMAN O43854	sp|O43854|EDIL3_HUMAN EGF-like repeat and discoidin I-like domain-containing protein 3 OS=Homo sapiens OX=9606 GN=EDIL3 PE=1 SV=1	10085	1	0	EDIL3	DEL1	protein-coding	5q14.3	EGF like repeats and discoidin domains 3 ||| EGF-like repeat and discoidin I-like domain-containing protein 3	.	16.2731	17.0567	17.4429	15.902	17.3935	16.6961	15.7906	17.0332	16.0983	17.819	0.670955	-0.869941
sp|O14639|ABLM1_HUMAN	sp|O14639|ABLM1_HUMAN	sp|O14639|ABLM1_HUMAN	__Other	sp|O14639|ABLM1_HUMAN	16	16	16	1	16	16	16	21.9	21.9	21.9	87.687	778	778	0	71.861				399	0	0	0	ABLM1_HUMAN O14639	sp|O14639|ABLM1_HUMAN Actin-binding LIM protein 1 OS=Homo sapiens OX=9606 GN=ABLIM1 PE=1 SV=3	3983	1	0	ABLIM1	ABLIM LIMAB1 LIMATIN abLIM-1	protein-coding	10q25.3	actin binding LIM protein 1 ||| Actin-binding LIM protein 1	.	16.5297	16.2354	16.135	16.7876	16.8471	17.3738	15.631	16.3165	15.4726	15.1211	-0.0755823	0.576984
sp|Q6ZUT6|CCD9B_HUMAN	sp|Q6ZUT6|CCD9B_HUMAN	sp|Q6ZUT6|CCD9B_HUMAN	__Other	sp|Q6ZUT6|CCD9B_HUMAN	10	10	10	1	10	10	10	18.2	18.2	18.2	57.324	534	534	0	18.928				4587	0	0	0	CCD9B_HUMAN Q6ZUT6	sp|Q6ZUT6|CCD9B_HUMAN Coiled-coil domain-containing protein 9B OS=Homo sapiens OX=9606 GN=CCDC9B PE=1 SV=1	388115	1	0	CCDC9B	C15orf52	protein-coding	15q15.1	coiled-coil domain containing 9B ||| Coiled-coil domain-containing protein 9B	.	15.274	15.3158	16.3397	15.7795	14.5132	14.1823	14.5947	15.6004	14.6987	15.7071	1.16278	0.602551
sp|Q9P2K5|MYEF2_HUMAN	sp|Q9P2K5|MYEF2_HUMAN	sp|Q9P2K5|MYEF2_HUMAN	__Other	sp|Q9P2K5|MYEF2_HUMAN	14	14	14	1	14	14	14	34.2	34.2	34.2	64.121	600	600	0	38.339				7789	0	0	0	MYEF2_HUMAN Q9P2K5	sp|Q9P2K5|MYEF2_HUMAN Myelin expression factor 2 OS=Homo sapiens OX=9606 GN=MYEF2 PE=1 SV=3	50804	1	0	MYEF2	HsT18564 MEF-2 MST156 MSTP156 myEF-2	protein-coding	15q21.1	myelin expression factor 2	.	14.7956	17.1519	15.8742	15.0314	15.8488	15.4237	16.7548	16.6959	15.1957	17.0735	-0.113101	-0.955865
sp|A2RUB6|CCD66_HUMAN;sp|Q9UKE5|TNIK_HUMAN	sp|Q9UKE5|TNIK_HUMAN;sp|A2RUB6|CCD66_HUMAN	sp|A2RUB6|CCD66_HUMAN;sp|Q9UKE5|TNIK_HUMAN	__Other	sp|Q9UKE5|TNIK_HUMAN	18;1	7;0	7;0	2	18	7	7	13.2	6.3	6.3	154.94	1360	1360;948	0	20.418				8022	0	0	0	CCD66_HUMAN A2RUB6 TNIK_HUMAN Q9UKE5	sp|Q9UKE5|TNIK_HUMAN TRAF2 and NCK-interacting protein kinase OS=Homo sapiens OX=9606 GN=TNIK PE=1 SV=1	285331 23043	2	4	CCDC66 TNIK	MRT54	protein-coding	3p14.3!3q26.2-q26.31	coiled-coil domain containing 66 ||| Coiled-coil domain-containing protein 66 ||| TRAF2 and NCK interacting kinase ||| TRAF2 and NCK-interacting protein kinase	.	12.4902	13.608	14.0196	12.3174	13.5046	11.8285	12.5229	12.8811	13.3546	13.8155	0.989034	-0.713163
sp|Q8N1Q1|CAH13_HUMAN	sp|Q8N1Q1|CAH13_HUMAN	sp|Q8N1Q1|CAH13_HUMAN	__Other	sp|Q8N1Q1|CAH13_HUMAN	2	2	2	1	2	2	2	10.7	10.7	10.7	29.443	262	262	0	5.3261				5104	0	0	0	CAH13_HUMAN Q8N1Q1	sp|Q8N1Q1|CAH13_HUMAN Carbonic anhydrase 13 OS=Homo sapiens OX=9606 GN=CA13 PE=1 SV=1	377677	1	0	CA13	CAXIII	protein-coding	8q21.2	carbonic anhydrase 13	.	14.4617	13.252	12.5185	14.874	13.4794	12.6353	12.5876	12.9907	13.1638	13.4713	-0.696556	1.65892
sp|Q15555|MARE2_HUMAN	sp|Q15555|MARE2_HUMAN	sp|Q15555|MARE2_HUMAN	__Other	sp|Q15555|MARE2_HUMAN	17	16	15	1	17	16	15	45.9	44	41	37.031	327	327	0	81.17				3759	0	0	0	MARE2_HUMAN Q15555	sp|Q15555|MARE2_HUMAN Microtubule-associated protein RP/EB family member 2 OS=Homo sapiens OX=9606 GN=MAPRE2 PE=1 SV=1	10982	1	0	MAPRE2	CSCSC2 EB1 EB2 RP1	protein-coding	18q12.1-q12.2	microtubule associated protein RP/EB family member 2 ||| Microtubule-associated protein RP/EB family member 2	.	15.8305	16.2482	17.3816	15.5528	17.1628	15.217	15.5979	15.8954	16.1988	16.1043	1.2428	-0.58608
sp|Q5T2T1|MPP7_HUMAN	sp|Q5T2T1|MPP7_HUMAN	sp|Q5T2T1|MPP7_HUMAN	__Other	sp|Q5T2T1|MPP7_HUMAN	7	7	7	1	7	7	7	18.9	18.9	18.9	65.523	576	576	0	24.321				4165	0	0	0	MPP7_HUMAN Q5T2T1	sp|Q5T2T1|MPP7_HUMAN MAGUK p55 subfamily member 7 OS=Homo sapiens OX=9606 GN=MPP7 PE=1 SV=1	143098	1	0	MPP7	---	protein-coding	10p12.1	membrane palmitoylated protein 7 ||| MAGUK p55 subfamily member 7	.	15.2562	14.3951	13.6392	15.5268	13.9431	15.2026	14.0059	14.6771	13.463	13.7211	-0.633166	1.25443
sp|Q14435|GALT3_HUMAN	sp|Q14435|GALT3_HUMAN	sp|Q14435|GALT3_HUMAN	__Other	sp|Q14435|GALT3_HUMAN	18	18	14	1	18	18	14	25	25	22	72.609	633	633	0	109.77				3554	0	0	0	GALT3_HUMAN Q14435	sp|Q14435|GALT3_HUMAN Polypeptide N-acetylgalactosaminyltransferase 3 OS=Homo sapiens OX=9606 GN=GALNT3 PE=1 SV=2	2591	1	0	GALNT3	GalNAc-T3 HFTC HFTC1 HHS	protein-coding	2q24.3	polypeptide N-acetylgalactosaminyltransferase 3	.	17.0645	16.2836	15.9929	17.3034	15.9173	17.0955	15.0145	16.6657	15.783	15.758	-0.198395	1.1121
sp|P14543|NID1_HUMAN	sp|P14543|NID1_HUMAN	sp|P14543|NID1_HUMAN	__Other	sp|P14543|NID1_HUMAN	4	4	4	1	4	4	4	4	4	4	136.38	1247	1247	0	6.869				1637	0	0	0	NID1_HUMAN P14543	sp|P14543|NID1_HUMAN Nidogen-1 OS=Homo sapiens OX=9606 GN=NID1 PE=1 SV=3	4811	1	0	NID1	NID	protein-coding	1q42.3	nidogen 1 ||| Nidogen-1	.	12.7191	13.4836	13.7854	12.5808	14.5993	12.7899	12.4957	12.6775	12.9945	13.8868	0.559139	-0.645471
sp|Q5JSL3|DOC11_HUMAN	sp|Q5JSL3|DOC11_HUMAN	sp|Q5JSL3|DOC11_HUMAN	__Other	sp|Q5JSL3|DOC11_HUMAN	1	1	1	1	1	1	1	0.5	0.5	0.5	237.67	2073	2073	0	3.9571				4101	0	0	0	DOC11_HUMAN Q5JSL3	sp|Q5JSL3|DOC11_HUMAN Dedicator of cytokinesis protein 11 OS=Homo sapiens OX=9606 GN=DOCK11 PE=1 SV=2	139818	1	0	DOCK11	ACG ZIZ2 bB128O4.1	protein-coding	Xq24	dedicator of cytokinesis 11 ||| Dedicator of cytokinesis protein 11	.	12.3208	11.4378	11.787	11.5714	12.7843	10.2198	10.7423	11.0438	11.1007	11.1331	0.489198	0.273629
sp|P78364|PHC1_HUMAN	sp|P78364|PHC1_HUMAN	sp|P78364|PHC1_HUMAN	__Other	sp|P78364|PHC1_HUMAN	4	4	4	1	4	4	4	4.5	4.5	4.5	105.53	1004	1004	0	11.698				2953	0	0	0	PHC1_HUMAN P78364	sp|P78364|PHC1_HUMAN Polyhomeotic-like protein 1 OS=Homo sapiens OX=9606 GN=PHC1 PE=1 SV=3	1911	1	0	PHC1	EDR1 HPH1 MCPH11 RAE28	protein-coding	12p13.31	polyhomeotic homolog 1 ||| Polyhomeotic-like protein 1	.	13.3025	13.6864	13.6359	12.6996	14.5302	12.8355	14.7926	13.0615	13.202	13.3912	0.117321	-0.818952
sp|Q13885|TBB2A_HUMAN	sp|Q13885|TBB2A_HUMAN	sp|Q13885|TBB2A_HUMAN	__Other	sp|Q13885|TBB2A_HUMAN	26	6	2	1	26	6	2	62	17.1	3.6	49.906	445	445	0	213.1				3473	0	0	0	TBB2A_HUMAN Q13885	sp|Q13885|TBB2A_HUMAN Tubulin beta-2A chain OS=Homo sapiens OX=9606 GN=TUBB2A PE=1 SV=1	7280	1	0	TUBB2A	CDCBM5 TUBB TUBB2	protein-coding	6p25.2	tubulin beta 2A class IIa ||| Tubulin beta-2A chain	.	14.7591	16.7071	17.6367	15.8011	16.5554	15.5961	16.2081	15.9689	16.5431	17.5639	1.15257	-0.683046
sp|Q9NWS6|F118A_HUMAN	sp|Q9NWS6|F118A_HUMAN	sp|Q9NWS6|F118A_HUMAN	__Other	sp|Q9NWS6|F118A_HUMAN	3	3	3	1	3	3	3	12.6	12.6	12.6	40.269	357	357	0	10.981				7567	0	0	0	F118A_HUMAN Q9NWS6	sp|Q9NWS6|F118A_HUMAN Protein FAM118A OS=Homo sapiens OX=9606 GN=FAM118A PE=1 SV=2	55007	1	0	FAM118A	C22orf8	protein-coding	22q13.31	family with sequence similarity 118 member A ||| Protein FAM118A	.		9.16118	8.87296	7.4098	8.846	9.55573	9.19213	7.98103	9.06859	9.63156	0.0532307	-1.40992
sp|Q9ULI3|HEG1_HUMAN	sp|Q9ULI3|HEG1_HUMAN	sp|Q9ULI3|HEG1_HUMAN	__Other	sp|Q9ULI3|HEG1_HUMAN	11	11	11	1	11	11	11	10.2	10.2	10.2	147.46	1381	1381	0	41.423				8079	0	0	0	HEG1_HUMAN Q9ULI3	sp|Q9ULI3|HEG1_HUMAN Protein HEG homolog 1 OS=Homo sapiens OX=9606 GN=HEG1 PE=1 SV=3	57493	1	0	HEG1	HEG MST112 MSTP112	protein-coding	3q21.2	heart development protein with EGF like domains 1 ||| Protein HEG homolog 1	.	14.7234	15.1896	16.0349	15.0402	14.8176	14.0183	14.2282	14.7336	15.5729	16.0121	0.977645	-0.0169747
sp|P28289|TMOD1_HUMAN	sp|P28289|TMOD1_HUMAN	sp|P28289|TMOD1_HUMAN	__Other	sp|P28289|TMOD1_HUMAN	4	3	3	1	4	3	3	15.9	13.6	13.6	40.569	359	359	0	10.291				1973	0	0	0	TMOD1_HUMAN P28289	sp|P28289|TMOD1_HUMAN Tropomodulin-1 OS=Homo sapiens OX=9606 GN=TMOD1 PE=1 SV=1	7111	1	0	TMOD1	D9S57E ETMOD TMOD	protein-coding	9q22.33	tropomodulin 1 ||| Tropomodulin-1	.	11.663	11.9791	11.6785	11.4713	13.5357	11.4489	11.5963	11.0654	11.5329	11.3462	-0.0308445	-0.238141
sp|P50452|SPB8_HUMAN	sp|P50452|SPB8_HUMAN	sp|P50452|SPB8_HUMAN	__Other	sp|P50452|SPB8_HUMAN	11	8	8	1	11	8	8	33.4	25.4	25.4	42.766	374	374	0	39.62				2479	0	0	0	SPB8_HUMAN P50452	sp|P50452|SPB8_HUMAN Serpin B8 OS=Homo sapiens OX=9606 GN=SERPINB8 PE=1 SV=2	5271	1	0	SERPINB8	C18orf53 CAP2 PI-8 PI8 PSS5	protein-coding	18q22.1	serpin family B member 8 ||| Serpin B8	.	13.3654	15.207	16.5992	14.2697	14.9574	14.2101	14.9846	14.5678	14.912	15.3754	1.61469	-0.714772
sp|Q9BRX8|PXL2A_HUMAN	sp|Q9BRX8|PXL2A_HUMAN	sp|Q9BRX8|PXL2A_HUMAN	__Other	sp|Q9BRX8|PXL2A_HUMAN	10	10	10	1	10	10	10	39.3	39.3	39.3	25.764	229	229	0	21.169				6557	0	0	0	PXL2A_HUMAN Q9BRX8	sp|Q9BRX8|PXL2A_HUMAN Peroxiredoxin-like 2A OS=Homo sapiens OX=9606 GN=PRXL2A PE=1 SV=3	84293	1	0	PRXL2A	Adrx C10orf58 FAM213A PAMM	protein-coding	10q23.1	peroxiredoxin like 2A ||| Peroxiredoxin-like 2A	.	15.733	16.1213	14.8554	16.0041	16.9058	17.1278	15.5732	15.4468	15.8928	16.3706	-1.16664	-0.0179978
sp|P05062|ALDOB_HUMAN	sp|P05062|ALDOB_HUMAN	sp|P05062|ALDOB_HUMAN	__Other	sp|P05062|ALDOB_HUMAN	3	1	1	1	3	1	1	6.3	2.5	2.5	39.473	364	364	0.0043753	1.4759				1338	0	0	0	ALDOB_HUMAN P05062	sp|P05062|ALDOB_HUMAN Fructose-bisphosphate aldolase B OS=Homo sapiens OX=9606 GN=ALDOB PE=1 SV=2	229	1	0	ALDOB	ALDB ALDO2	protein-coding	9q31.1	aldolase, fructose-bisphosphate B ||| Fructose-bisphosphate aldolase B	.	14.8351	14.1311	14.941	14.4557	13.3348	14.6192	13.3769	14.7244	13.0331	13.4832	0.944993	0.45965
sp|P08670|VIME_HUMAN;sp|P17661|DESM_HUMAN;sp|P41219|PERI_HUMAN	sp|P08670|VIME_HUMAN;sp|P17661|DESM_HUMAN;sp|P41219|PERI_HUMAN	sp|P08670|VIME_HUMAN;sp|P17661|DESM_HUMAN;sp|P41219|PERI_HUMAN	__Other	sp|P08670|VIME_HUMAN	70;7;5	70;7;5	63;3;3	3	70	70	63	86.7	86.7	83.5	53.651	466	466;470;470	0	323.31				1450	0	0	0	DESM_HUMAN P17661 PERI_HUMAN P41219 VIME_HUMAN P08670	sp|P08670|VIME_HUMAN Vimentin OS=Homo sapiens OX=9606 GN=VIM PE=1 SV=4	1674 5630 7431	3	5	DES PRPH VIM	CDCD3 CMD1F CSM1 CSM2 LGMD1D LGMD1E LGMD2R NEF4 PRPH1	protein-coding	2q35!12q13.12!10p13	desmin ||| peripherin ||| vimentin	.	22.3955	22.3832	22.9323	21.9664	22.7568	20.8352	22.4264	21.4154	22.3602	22.9589	0.725844	-0.240099
sp|Q6ICH7|ASPH2_HUMAN	sp|Q6ICH7|ASPH2_HUMAN	sp|Q6ICH7|ASPH2_HUMAN	__Other	sp|Q6ICH7|ASPH2_HUMAN	1	1	1	1	1	1	1	2.7	2.7	2.7	41.698	369	369	0	4.2895				4346	0	0	0	ASPH2_HUMAN Q6ICH7	sp|Q6ICH7|ASPH2_HUMAN Aspartate beta-hydroxylase domain-containing protein 2 OS=Homo sapiens OX=9606 GN=ASPHD2 PE=2 SV=1	57168	1	0	ASPHD2	---	protein-coding	22q12.1	aspartate beta-hydroxylase domain containing 2 ||| Aspartate beta-hydroxylase domain-containing protein 2	.		10.2071	10.1554	8.99258	11.0677	9.77853	10.919	9.95077	9.14949	10.5117	0.089715	-1.07306
sp|Q6DKJ4|NXN_HUMAN	sp|Q6DKJ4|NXN_HUMAN	sp|Q6DKJ4|NXN_HUMAN	__Other	sp|Q6DKJ4|NXN_HUMAN	20	20	20	1	20	20	20	58.2	58.2	58.2	48.392	435	435	0	208.27				4324	0	0	0	NXN_HUMAN Q6DKJ4	sp|Q6DKJ4|NXN_HUMAN Nucleoredoxin OS=Homo sapiens OX=9606 GN=NXN PE=1 SV=2	64359	1	0	NXN	NRX RRS2 TRG-4	protein-coding	17p13.3	nucleoredoxin	.	16.6976	17.0943	18.0956	16.2736	16.0853	16.3263	17.7977	16.5152	17.3684	17.1346	1.14603	-0.675988
sp|O00767|ACOD_HUMAN	sp|O00767|ACOD_HUMAN	sp|O00767|ACOD_HUMAN	__Other	sp|O00767|ACOD_HUMAN	7	7	7	1	7	7	7	24.5	24.5	24.5	41.522	359	359	0	101.39				377	0	0	0	ACOD_HUMAN O00767	sp|O00767|ACOD_HUMAN Acyl-CoA desaturase OS=Homo sapiens OX=9606 GN=SCD PE=1 SV=2	6319	1	0	SCD	FADS5 MSTP008 SCD1 SCDOS hSCD1	protein-coding	10q24.31	stearoyl-CoA desaturase ||| Acyl-CoA desaturase	.	16.1909	15.804	14.4957	15.9488	15.5209	17.1785	15.9847	15.3688	15.3859	15.6601	-1.1972	0.255844
sp|Q00013|EM55_HUMAN	sp|Q00013|EM55_HUMAN	sp|Q00013|EM55_HUMAN	__Other	sp|Q00013|EM55_HUMAN	4	4	4	1	4	4	4	11.4	11.4	11.4	52.296	466	466	0	4.978				3031	0	0	0	EM55_HUMAN Q00013	sp|Q00013|EM55_HUMAN 55 kDa erythrocyte membrane protein OS=Homo sapiens OX=9606 GN=MPP1 PE=1 SV=2	4354	1	0	MPP1	AAG12 DXS552E EMP55 MRG1 PEMP	protein-coding	Xq28	membrane palmitoylated protein 1 ||| 55 kDa erythrocyte membrane protein	.	12.7749	13.5063	13.4265	14.2282	12.7687	12.2302	12.926	13.7957	12.5873	14.2097	0.154939	0.956634
sp|O43286|B4GT5_HUMAN	sp|O43286|B4GT5_HUMAN	sp|O43286|B4GT5_HUMAN	__Other	sp|O43286|B4GT5_HUMAN	1	1	1	1	1	1	1	2.1	2.1	2.1	45.118	388	388	0.0056887	1.3611				594	0	0	0	B4GT5_HUMAN O43286	sp|O43286|B4GT5_HUMAN Beta-1,4-galactosyltransferase 5 OS=Homo sapiens OX=9606 GN=B4GALT5 PE=1 SV=1	9334	1	0	B4GALT5	B4Gal-T5 BETA4-GALT-IV beta4Gal-T5 beta4GalT-V gt-V	protein-coding	20q13.13	beta-1,4-galactosyltransferase 5	.	12.3512	12.6792	11.7749	13.0644	11.9427	13.6914	11.4586	12.8818	12.7438	12.0873	-0.680722	0.60877
sp|P11166|GTR1_HUMAN	sp|P11166|GTR1_HUMAN	sp|P11166|GTR1_HUMAN	__Other	sp|P11166|GTR1_HUMAN	9	9	9	1	9	9	9	14.4	14.4	14.4	54.083	492	492	0	104.28				1548	0	0	0	GTR1_HUMAN P11166	sp|P11166|GTR1_HUMAN Solute carrier family 2, facilitated glucose transporter member 1 OS=Homo sapiens OX=9606 GN=SLC2A1 PE=1 SV=2	6513	1	0	SLC2A1	CSE DYT17 DYT18 DYT9 EIG12 GLUT GLUT-1 GLUT1 GLUT1DS HTLVR PED SDCHCN	protein-coding	1p34.2	solute carrier family 2 member 1 ||| Solute carrier family 2, facilitated glucose transporter member 1	.	17.0523	16.7721	16.8603	17.5114	16.1713	16.8312	15.4119	17.811	16.3853	16.5102	0.173739	0.824817
sp|Q9BUL9|RPP25_HUMAN	sp|Q9BUL9|RPP25_HUMAN	sp|Q9BUL9|RPP25_HUMAN	__Other	sp|Q9BUL9|RPP25_HUMAN	10	10	10	1	10	10	10	66.3	66.3	66.3	20.632	199	199	0	66.905				6644	0	0	0	RPP25_HUMAN Q9BUL9	sp|Q9BUL9|RPP25_HUMAN Ribonuclease P protein subunit p25 OS=Homo sapiens OX=9606 GN=RPP25 PE=1 SV=1	54913	1	0	RPP25	---	protein-coding	15q24.2	ribonuclease P and MRP subunit p25 ||| Ribonuclease P protein subunit p25	.	15.0946	15.1991	13.9851	15.3932	15.8707	16.0569	15.111	15.3286	15.2769	14.0545	-1.14952	0.25861
sp|P08842|STS_HUMAN	sp|P08842|STS_HUMAN	sp|P08842|STS_HUMAN	__Other	sp|P08842|STS_HUMAN	3	3	3	1	3	3	3	5.3	5.3	5.3	65.492	583	583	0	6.3595				1455	0	0	0	STS_HUMAN P08842	sp|P08842|STS_HUMAN Steryl-sulfatase OS=Homo sapiens OX=9606 GN=STS PE=1 SV=2	412	1	0	STS	ARSC ARSC1 ASC ES SSDD XLI	protein-coding	Xp22.31	steroid sulfatase ||| Steryl-sulfatase	.	13.7896	14.0151	14.0236	13.8888	13.2299	14.1122	13.1464	15.3599	13.3079	13.1496	0.246277	0.111551
sp|Q9NP74|PALMD_HUMAN	sp|Q9NP74|PALMD_HUMAN	sp|Q9NP74|PALMD_HUMAN	__Other	sp|Q9NP74|PALMD_HUMAN	4	3	3	1	4	3	3	7.8	6.5	6.5	62.757	551	551	0	6.1532				7300	0	0	0	PALMD_HUMAN Q9NP74	sp|Q9NP74|PALMD_HUMAN Palmdelphin OS=Homo sapiens OX=9606 GN=PALMD PE=1 SV=1	54873	1	0	PALMD	C1orf11 PALML	protein-coding	1p21.2	palmdelphin	.	12.9908	12.2645	11.6249	11.8538	12.0189	11.4586	12.0385	11.5476	13.8169	11.8103	-0.396327	-0.167429
sp|P04733|MT1F_HUMAN	sp|P04733|MT1F_HUMAN	sp|P04733|MT1F_HUMAN	__Other	sp|P04733|MT1F_HUMAN	3	2	2	1	3	2	2	34.4	21.3	21.3	6.0863	61	61	0.00087478	2.1595				1328	0	0	0	MT1F_HUMAN P04733	sp|P04733|MT1F_HUMAN Metallothionein-1F OS=Homo sapiens OX=9606 GN=MT1F PE=1 SV=1	4494	1	0	MT1F	MT1	protein-coding	16q13	metallothionein 1F ||| Metallothionein-1F	.	13.9661	12.818	13.2598	13.2081	12.2653	12.0447	11.8033	13.9962	12.2064	12.9554	0.542376	0.490725
sp|P13987|CD59_HUMAN	sp|P13987|CD59_HUMAN	sp|P13987|CD59_HUMAN	__Other	sp|P13987|CD59_HUMAN	7	7	7	1	7	7	7	28.1	28.1	28.1	14.177	128	128	0	27.547				1626	0	0	0	CD59_HUMAN P13987	sp|P13987|CD59_HUMAN CD59 glycoprotein OS=Homo sapiens OX=9606 GN=CD59 PE=1 SV=1	966	1	0	CD59	16.3A5 1F5 EJ16 EJ30 EL32 G344 HRF-20 HRF20 MAC-IP MACIF MEM43 MIC11 MIN1 MIN2 MIN3 MIRL MSK21 p18-20	protein-coding	11p13	CD59 molecule (CD59 blood group) ||| CD59 glycoprotein	.	17.8581	17.3612	17.9425	18.0823	17.7456	16.8919	15.7816	17.1556	16.9236	17.62	0.674626	0.814424
sp|P55211|CASP9_HUMAN	sp|P55211|CASP9_HUMAN	sp|P55211|CASP9_HUMAN	__Other	sp|P55211|CASP9_HUMAN	2	2	2	1	2	2	2	4.1	4.1	4.1	46.28	416	416	0.00038057	2.591				2679	0	0	0	CASP9_HUMAN P55211	sp|P55211|CASP9_HUMAN Caspase-9 OS=Homo sapiens OX=9606 GN=CASP9 PE=1 SV=3	842	1	0	CASP9	APAF-3 APAF3 ICE-LAP6 MCH6 PPP1R56	protein-coding	1p36.21	caspase 9 ||| Caspase-9	.	12.3904	13.6904	13.4112	12.7885	12.6325	14.853	12.6814	13.0837	13.8871	13.5801	0.0465027	-0.576202
sp|Q12980|NPRL3_HUMAN	sp|Q12980|NPRL3_HUMAN	sp|Q12980|NPRL3_HUMAN	__Other	sp|Q12980|NPRL3_HUMAN	2	2	2	1	2	2	2	4.2	4.2	4.2	63.604	569	569	0.0013688	2.0774				3295	0	0	0	NPRL3_HUMAN Q12980	sp|Q12980|NPRL3_HUMAN GATOR complex protein NPRL3 OS=Homo sapiens OX=9606 GN=NPRL3 PE=1 SV=1	8131	1	0	NPRL3	C16orf35 CGTHBA FFEVF3 HS-40 MARE NPR3 RMD11	protein-coding	16p13.3	NPR3 like, GATOR1 complex subunit ||| GATOR complex protein NPRL3	.		9.35493	9.08611	8.34171	7.14939	8.47366	8.84003	9.15852	9.51294	9.26939	0.35714	-0.387257
sp|O60443|GSDME_HUMAN	sp|O60443|GSDME_HUMAN	sp|O60443|GSDME_HUMAN	__Other	sp|O60443|GSDME_HUMAN	13	13	13	1	13	13	13	31.9	31.9	31.9	54.554	496	496	0	47.615				739	0	0	0	GSDME_HUMAN O60443	sp|O60443|GSDME_HUMAN Gasdermin-E OS=Homo sapiens OX=9606 GN=GSDME PE=1 SV=2	1687	1	0	GSDME	DFNA5 ICERE-1	protein-coding	7p15.3	gasdermin E ||| Gasdermin-E	.	15.5771	16.1911	17.4711	15.5692	15.6597	15.2135	15.7672	15.542	16.6824	16.3617	1.43779	-0.464113
sp|Q13015|AF1Q_HUMAN	sp|Q13015|AF1Q_HUMAN	sp|Q13015|AF1Q_HUMAN	__Other	sp|Q13015|AF1Q_HUMAN	3	3	3	1	3	3	3	73.3	73.3	73.3	10.061	90	90	0	80.26				3303	0	0	0	AF1Q_HUMAN Q13015	sp|Q13015|AF1Q_HUMAN Protein AF1q OS=Homo sapiens OX=9606 GN=MLLT11 PE=1 SV=1	10962	1	0	MLLT11	AF1Q	protein-coding	1q21.3	MLLT11 transcription factor 7 cofactor ||| Protein AF1q	.		13.7864	12.9796	13.0656	14.7865	12.9282	14.0134	12.5464	13.7182	14.023	-0.52802	-0.442016
sp|Q9UNN8|EPCR_HUMAN	sp|Q9UNN8|EPCR_HUMAN	sp|Q9UNN8|EPCR_HUMAN	__Other	sp|Q9UNN8|EPCR_HUMAN	5	5	5	1	5	5	5	23.9	23.9	23.9	26.671	238	238	0	35.193				8143	0	0	0	EPCR_HUMAN Q9UNN8	sp|Q9UNN8|EPCR_HUMAN Endothelial protein C receptor OS=Homo sapiens OX=9606 GN=PROCR PE=1 SV=1	10544	1	0	PROCR	CCCA CCD41 EPCR	protein-coding	20q11.22	protein C receptor ||| Endothelial protein C receptor	.	15.424	15.5006	15.5783	14.9069	16.4927	14.8349	16.3833	15.0728	15.3128	14.3665	0.209771	-0.461665
sp|Q03169|TNAP2_HUMAN	sp|Q03169|TNAP2_HUMAN	sp|Q03169|TNAP2_HUMAN	__Other	sp|Q03169|TNAP2_HUMAN	27	27	27	1	27	27	27	44.8	44.8	44.8	72.66	654	654	0	100.84				3116	0	0	0	TNAP2_HUMAN Q03169	sp|Q03169|TNAP2_HUMAN Tumor necrosis factor alpha-induced protein 2 OS=Homo sapiens OX=9606 GN=TNFAIP2 PE=2 SV=2	7127	1	0	TNFAIP2	B94 EXOC3L3	protein-coding	14q32.32	TNF alpha induced protein 2 ||| Tumor necrosis factor alpha-induced protein 2	.	16.6427	17.1496	16.7535	16.8234	16.1791	17.5155	16.1307	18.3924	17.4233	16.8534	-0.255432	-0.185521
sp|O43396|TXNL1_HUMAN	sp|O43396|TXNL1_HUMAN	sp|O43396|TXNL1_HUMAN	__Other	sp|O43396|TXNL1_HUMAN	19	19	19	1	19	19	19	74.4	74.4	74.4	32.251	289	289	0	323.31				614	0	0	0	TXNL1_HUMAN O43396	sp|O43396|TXNL1_HUMAN Thioredoxin-like protein 1 OS=Homo sapiens OX=9606 GN=TXNL1 PE=1 SV=3	9352	1	0	TXNL1	HEL-S-114 TRP32 TXL-1 TXNL Txl	protein-coding	18q21.31	thioredoxin like 1 ||| Thioredoxin-like protein 1	.	17.4245	17.7958	18.653	17.6543	18.7057	17.611	17.5886	16.4069	17.6812	17.1409	0.972816	-0.0259321
sp|P14384|CBPM_HUMAN	sp|P14384|CBPM_HUMAN	sp|P14384|CBPM_HUMAN	__Other	sp|P14384|CBPM_HUMAN	6	6	6	1	6	6	6	21.4	21.4	21.4	50.513	443	443	0	49.242				1635	0	0	0	CBPM_HUMAN P14384	sp|P14384|CBPM_HUMAN Carboxypeptidase M OS=Homo sapiens OX=9606 GN=CPM PE=1 SV=2	1368	1	0	CPM	---	protein-coding	12q15	carboxypeptidase M	.	15.3469	14.4815	14.532	14.0985	16.0546	13.9766	14.0299	14.9392	14.0464	13.8036	0.0969385	-0.336562
sp|Q8WWI1|LMO7_HUMAN	sp|Q8WWI1|LMO7_HUMAN	sp|Q8WWI1|LMO7_HUMAN	__Other	sp|Q8WWI1|LMO7_HUMAN	77	77	77	1	77	77	77	50.7	50.7	50.7	192.69	1683	1683	0	323.31				5622	0	0	0	LMO7_HUMAN Q8WWI1	sp|Q8WWI1|LMO7_HUMAN LIM domain only protein 7 OS=Homo sapiens OX=9606 GN=LMO7 PE=1 SV=3	4008	1	0	LMO7	FBX20 FBXO20 LMO7b LOMP	protein-coding	13q22.2	LIM domain 7 ||| LIM domain only protein 7	.	19.5721	19.0369	19.2995	19.9705	18.5669	19.5244	17.9159	18.8356	17.9391	19.3719	0.37151	1.04256
sp|P84157|MXRA7_HUMAN	sp|P84157|MXRA7_HUMAN	sp|P84157|MXRA7_HUMAN	__Other	sp|P84157|MXRA7_HUMAN	7	7	7	1	7	7	7	34.8	34.8	34.8	21.466	204	204	0	169.03				3010	0	0	0	MXRA7_HUMAN P84157	sp|P84157|MXRA7_HUMAN Matrix-remodeling-associated protein 7 OS=Homo sapiens OX=9606 GN=MXRA7 PE=1 SV=1	439921	1	0	MXRA7	---	protein-coding	17q25.1	matrix remodeling associated 7 ||| Matrix-remodeling-associated protein 7	.	15.2732	15.5256	16.2523	15.5581	15.9972	14.051	14.6744	15.4949	15.0771	15.9828	0.866349	0.172097
sp|Q9NUJ3|T11L1_HUMAN	sp|Q9NUJ3|T11L1_HUMAN	sp|Q9NUJ3|T11L1_HUMAN	__Other	sp|Q9NUJ3|T11L1_HUMAN	2	2	2	1	2	2	2	3.9	3.9	3.9	57.034	509	509	0	3.6239				7474	0	0	0	T11L1_HUMAN Q9NUJ3	sp|Q9NUJ3|T11L1_HUMAN T-complex protein 11-like protein 1 OS=Homo sapiens OX=9606 GN=TCP11L1 PE=1 SV=1	55346	1	0	TCP11L1	dJ85M6.3	protein-coding	11p13	t-complex 11 like 1 ||| T-complex protein 11-like protein 1	.	11.9957	13.1337	14.0324	12.4294	12.5211	12.4638	13.944	12.019	12.5636	13.1831	1.13784	-0.465172
sp|Q9BRF8|CPPED_HUMAN	sp|Q9BRF8|CPPED_HUMAN	sp|Q9BRF8|CPPED_HUMAN	__Other	sp|Q9BRF8|CPPED_HUMAN	7	7	7	1	7	7	7	28.7	28.7	28.7	35.548	314	314	0	59.788				6529	0	0	0	CPPED_HUMAN Q9BRF8	sp|Q9BRF8|CPPED_HUMAN Serine/threonine-protein phosphatase CPPED1 OS=Homo sapiens OX=9606 GN=CPPED1 PE=1 SV=3	55313	1	0	CPPED1	CSTP1	protein-coding	16p13.12	calcineurin like phosphoesterase domain containing 1 ||| Serine/threonine-protein phosphatase CPPED1	.	15.1562	15.2536	16.5672	15.3033	14.481	14.5386	14.6998	15.0582	14.1713	15.29	1.55353	0.289592
sp|P56134|ATPK_HUMAN	sp|P56134|ATPK_HUMAN	sp|P56134|ATPK_HUMAN	__Other	sp|P56134|ATPK_HUMAN	2	2	2	1	2	2	2	25.5	25.5	25.5	10.918	94	94	0	31.899				2699	0	0	0	ATPK_HUMAN P56134	sp|P56134|ATPK_HUMAN ATP synthase subunit f, mitochondrial OS=Homo sapiens OX=9606 GN=ATP5MF PE=1 SV=3	9551	1	0	ATP5MF	ATP5J2 ATP5JL	protein-coding	7q22.1	ATP synthase membrane subunit f ||| ATP synthase subunit f, mitochondrial	.	16.2633	16.588	15.0375	16.8839	17.4095	16.853	17.0194	16.5411	16.5498	15.8801	-1.48427	0.362069
sp|Q7L0J3|SV2A_HUMAN	sp|Q7L0J3|SV2A_HUMAN	sp|Q7L0J3|SV2A_HUMAN	__Other	sp|Q7L0J3|SV2A_HUMAN	4	4	4	1	4	4	4	4.7	4.7	4.7	82.694	742	742	0	6.6337				4632	0	0	0	SV2A_HUMAN Q7L0J3	sp|Q7L0J3|SV2A_HUMAN Synaptic vesicle glycoprotein 2A OS=Homo sapiens OX=9606 GN=SV2A PE=1 SV=1	9900	1	0	SV2A	SV2	protein-coding	1q21.2	synaptic vesicle glycoprotein 2A	.	13.1151	13.3756	13.1782	12.6412	13.682	12.4765	13.4745	12.5446	12.7352	14.6516	0.00526289	-0.531803
sp|Q13077|TRAF1_HUMAN	sp|Q13077|TRAF1_HUMAN	sp|Q13077|TRAF1_HUMAN	__Other	sp|Q13077|TRAF1_HUMAN	4	4	4	1	4	4	4	8.9	8.9	8.9	46.163	416	416	0	5.8056				3313	0	0	0	TRAF1_HUMAN Q13077	sp|Q13077|TRAF1_HUMAN TNF receptor-associated factor 1 OS=Homo sapiens OX=9606 GN=TRAF1 PE=1 SV=1	7185	1	0	TRAF1	EBI6 MGC:10353	protein-coding	9q33.2	TNF receptor associated factor 1 ||| TNF receptor-associated factor 1	.	13.8797	14.4803	15.1505	13.996	13.3874	13.3175	14.3532	14.5055	15.3886	14.0888	0.877099	-0.277407
sp|Q9BQI0|AIF1L_HUMAN	sp|Q9BQI0|AIF1L_HUMAN	sp|Q9BQI0|AIF1L_HUMAN	__Other	sp|Q9BQI0|AIF1L_HUMAN	3	3	3	1	3	3	3	21.3	21.3	21.3	17.068	150	150	0	2.9376				6515	0	0	0	AIF1L_HUMAN Q9BQI0	sp|Q9BQI0|AIF1L_HUMAN Allograft inflammatory factor 1-like OS=Homo sapiens OX=9606 GN=AIF1L PE=1 SV=1	83543	1	0	AIF1L	C9orf58 IBA2	protein-coding	9q34.12-q34.13	allograft inflammatory factor 1 like ||| Allograft inflammatory factor 1-like	.	12.9436	13.901	13.0454	13.8026	13.2386	14.6568	14.8896	14.1094	12.8843	13.4204	-0.710485	0.0467468
sp|G9CGD6|CNIPF_HUMAN;sp|Q6P9H4|CNKR3_HUMAN	sp|Q6P9H4|CNKR3_HUMAN;sp|G9CGD6|CNIPF_HUMAN	sp|G9CGD6|CNIPF_HUMAN;sp|Q6P9H4|CNKR3_HUMAN	__Other	sp|G9CGD6|CNIPF_HUMAN;sp|Q6P9H4|CNKR3_HUMAN	3;3	3;3	3;3	2	3	3	3	7	7	7	61.903	555	555;899	0.0069653	1.2225				271	0	0	0	CNKR3_HUMAN Q6P9H4 CNIPF_HUMAN G9CGD6	sp|Q6P9H4|CNKR3_HUMAN Connector enhancer of kinase suppressor of ras 3 OS=Homo sapiens OX=9606 GN=CNKSR3 PE=1 SV=1;sp|G9CGD6|CNIPF_HUMAN CNK3/IPCEF1 fusion protein OS=Homo sapiens OX=9606 GN=CNK3/IPCEF1 PE=1 SV=1	154043	1	0	CNKSR3	CNK3 CNK3/IPCEF1 MAGI1	protein-coding	6q25.2	CNKSR family member 3 ||| Connector enhancer of kinase suppressor of ras 3 ||| CNK3/IPCEF1 fusion protein	.	12.5092	11.3788	11.8437	10.7451	12.7385	10.8589	10.5082	10.9615	11.194	10.7233	0.647001	-0.451522
sp|Q6PCB8|EMB_HUMAN	sp|Q6PCB8|EMB_HUMAN	sp|Q6PCB8|EMB_HUMAN	__Other	sp|Q6PCB8|EMB_HUMAN	7	7	7	1	7	7	7	29.4	29.4	29.4	36.881	327	327	0	37.795				4448	0	0	0	EMB_HUMAN Q6PCB8	sp|Q6PCB8|EMB_HUMAN Embigin OS=Homo sapiens OX=9606 GN=EMB PE=1 SV=1	133418	1	0	EMB	GP70	protein-coding	5q11.1	embigin	.	15.4243	14.8947	14.8298	15.5829	15.9351	15.0378	14.2131	15.3426	14.2273	13.8085	-0.0423711	0.710721
sp|Q8WX93|PALLD_HUMAN	sp|Q8WX93|PALLD_HUMAN	sp|Q8WX93|PALLD_HUMAN	__Other	sp|Q8WX93|PALLD_HUMAN	34	34	33	1	34	34	33	31.7	31.7	30.9	150.56	1383	1383	0	323.31				5633	0	0	0	PALLD_HUMAN Q8WX93	sp|Q8WX93|PALLD_HUMAN Palladin OS=Homo sapiens OX=9606 GN=PALLD PE=1 SV=3	23022	1	0	PALLD	CGI-151 CGI151 MYN PNCA1 SIH002	protein-coding	4q32.3	palladin, cytoskeletal associated protein ||| Palladin	.	17.5097	18.1945	19.0016	18.1849	17.8015	17.5914	16.7316	17.7373	18.2934	18.9263	0.968117	0.151329
sp|Q9BQ90|KLDC3_HUMAN	sp|Q9BQ90|KLDC3_HUMAN	sp|Q9BQ90|KLDC3_HUMAN	__Other	sp|Q9BQ90|KLDC3_HUMAN	1	1	1	1	1	1	1	3.7	3.7	3.7	43.087	382	382	0	8.3016				6500	0	0	0	KLDC3_HUMAN Q9BQ90	sp|Q9BQ90|KLDC3_HUMAN Kelch domain-containing protein 3 OS=Homo sapiens OX=9606 GN=KLHDC3 PE=2 SV=1	116138	1	0	KLHDC3	PEAS dJ20C7.3	protein-coding	6p21.1	kelch domain containing 3 ||| Kelch domain-containing protein 3	.	11.9345	11.9081	11.6235	12.4414	11.8406	13.6059	11.3302	12.6276	11.9564	11.5648	-0.500311	0.317561
sp|Q6ZU35|CRAD_HUMAN	sp|Q6ZU35|CRAD_HUMAN	sp|Q6ZU35|CRAD_HUMAN	__Other	sp|Q6ZU35|CRAD_HUMAN	4	4	4	1	4	4	4	3.5	3.5	3.5	136.76	1233	1233	0.0036648	1.6065				4582	0	0	0	CRAD_HUMAN Q6ZU35	sp|Q6ZU35|CRAD_HUMAN Cancer-related regulator of actin dynamics OS=Homo sapiens OX=9606 GN=CRAD PE=1 SV=3	57482	1	0	CRACD	CRAD KIAA1211	protein-coding	4q12	capping protein inhibiting regulator of actin dynamics ||| Cancer-related regulator of actin dynamics	.		11.5454	10.5556	10.7798	12.729	11.7352	11.2621	10.9393	10.4813	11.4394	-0.684644	-0.46041
sp|Q13740|CD166_HUMAN	sp|Q13740|CD166_HUMAN	sp|Q13740|CD166_HUMAN	__Other	sp|Q13740|CD166_HUMAN	26	26	26	1	26	26	26	41	41	41	65.102	583	583	0	190.06				3457	0	0	0	CD166_HUMAN Q13740	sp|Q13740|CD166_HUMAN CD166 antigen OS=Homo sapiens OX=9606 GN=ALCAM PE=1 SV=2	214	1	0	ALCAM	CD166 MEMD	protein-coding	3q13.11	activated leukocyte cell adhesion molecule ||| CD166 antigen	.	18.606	18.1655	19.0039	18.725	18.3975	17.9292	16.5458	17.7951	18.186	18.1676	0.91014	0.631233
sp|Q96HH9|GRM2B_HUMAN	sp|Q96HH9|GRM2B_HUMAN	sp|Q96HH9|GRM2B_HUMAN	__Other	sp|Q96HH9|GRM2B_HUMAN	3	3	3	1	3	3	3	10.4	10.4	10.4	47.869	432	432	0	34.776				6119	0	0	0	GRM2B_HUMAN Q96HH9	sp|Q96HH9|GRM2B_HUMAN GRAM domain-containing protein 2B OS=Homo sapiens OX=9606 GN=GRAMD2B PE=1 SV=1	65983	1	0	GRAMD2B	GRAMD3 NS3TP2	protein-coding	5q23.2	GRAM domain containing 2B ||| GRAM domain-containing protein 2B	.	12.1544	12.5705	13.7821	12.3278	11.925	12.3514	11.374	12.5767	11.9637	13.0537	1.36279	-0.0915027
sp|Q93045|STMN2_HUMAN	sp|Q93045|STMN2_HUMAN	sp|Q93045|STMN2_HUMAN	__Other	sp|Q93045|STMN2_HUMAN	5	1	1	1	5	1	1	15.1	5.6	5.6	20.828	179	179	0	5.3298				5805	0	0	0	STMN2_HUMAN Q93045	sp|Q93045|STMN2_HUMAN Stathmin-2 OS=Homo sapiens OX=9606 GN=STMN2 PE=1 SV=3	11075	1	0	STMN2	SCG10 SCGN10	protein-coding	8q21.13	stathmin 2 ||| Stathmin-2	.	14.1236	14.8699	15.8409	14.319	13.7468	13.9309	15.0639	14.4913	15.1969	15.39	1.09345	-0.428429
sp|Q9HBI1|PARVB_HUMAN	sp|Q9HBI1|PARVB_HUMAN	sp|Q9HBI1|PARVB_HUMAN	__Other	sp|Q9HBI1|PARVB_HUMAN	5	4	4	1	5	4	4	14.3	12.1	12.1	41.714	364	364	0	15.395				7232	0	0	0	PARVB_HUMAN Q9HBI1	sp|Q9HBI1|PARVB_HUMAN Beta-parvin OS=Homo sapiens OX=9606 GN=PARVB PE=1 SV=1	29780	1	0	PARVB	CGI-56	protein-coding	22q13.31	parvin beta ||| Beta-parvin	.	13.093	14.075	13.9371	13.371	14.8412	15.1382	14.1272	12.8908	13.7083	13.6866	-0.0254214	-0.591557
sp|Q9BYX2|TBD2A_HUMAN	sp|Q9BYX2|TBD2A_HUMAN	sp|Q9BYX2|TBD2A_HUMAN	__Other	sp|Q9BYX2|TBD2A_HUMAN	19	19	19	1	19	19	19	24	24	24	105.41	928	928	0	68.712				6794	0	0	0	TBD2A_HUMAN Q9BYX2	sp|Q9BYX2|TBD2A_HUMAN TBC1 domain family member 2A OS=Homo sapiens OX=9606 GN=TBC1D2 PE=1 SV=3	55357	1	0	TBC1D2	PARIS-1 PARIS1 TBC1D2A	protein-coding	9q22.33	TBC1 domain family member 2 ||| TBC1 domain family member 2A	.	16.0313	16.0867	17.4435	16.3558	15.4611	15.6085	14.9373	15.7499	15.9986	15.9771	1.50202	0.414364
sp|P28300|LYOX_HUMAN	sp|P28300|LYOX_HUMAN	sp|P28300|LYOX_HUMAN	__Other	sp|P28300|LYOX_HUMAN	8	8	8	1	8	8	8	26.1	26.1	26.1	46.944	417	417	0	67.568				1975	0	0	0	LYOX_HUMAN P28300	sp|P28300|LYOX_HUMAN Protein-lysine 6-oxidase OS=Homo sapiens OX=9606 GN=LOX PE=1 SV=2	4015	1	0	LOX	AAT10	protein-coding	5q23.1	lysyl oxidase ||| Protein-lysine 6-oxidase	.	14.2289	14.7471	15.9536	14.4391	14.7606	13.9749	13.6849	14.2568	14.048	15.1638	1.41844	-0.0961126
sp|Q13572|ITPK1_HUMAN	sp|Q13572|ITPK1_HUMAN	sp|Q13572|ITPK1_HUMAN	__Other	sp|Q13572|ITPK1_HUMAN	9	9	9	1	9	9	9	30.9	30.9	30.9	45.621	414	414	0	102.37				3427	0	0	0	ITPK1_HUMAN Q13572	sp|Q13572|ITPK1_HUMAN Inositol-tetrakisphosphate 1-kinase OS=Homo sapiens OX=9606 GN=ITPK1 PE=1 SV=2	3705	1	0	ITPK1	ITRPK1	protein-coding	14q32.12	inositol-tetrakisphosphate 1-kinase	.	13.7343	14.8162	15.8415	14.0988	15.1906	15.6115	14.162	14.1595	15.1978	14.1406	1.04119	-0.701508
sp|Q68D85|NR3L1_HUMAN	sp|Q68D85|NR3L1_HUMAN	sp|Q68D85|NR3L1_HUMAN	__Other	sp|Q68D85|NR3L1_HUMAN	1	1	1	1	1	1	1	2.2	2.2	2.2	50.827	454	454	0.00075519	2.3974				4299	0	0	0	NR3L1_HUMAN Q68D85	sp|Q68D85|NR3L1_HUMAN Natural cytotoxicity triggering receptor 3 ligand 1 OS=Homo sapiens OX=9606 GN=NCR3LG1 PE=1 SV=1	374383	1	0	NCR3LG1	B7-H6 B7H6 DKFZp686O24166	protein-coding	11p15.1	natural killer cell cytotoxicity receptor 3 ligand 1 ||| Natural cytotoxicity triggering receptor 3 ligand 1	.		11.3832	10.9478	11.0667	12.6144	10.0782	11.7197	10.8671	11.2952	10.9399	-0.243354	-0.124423
sp|P24844|MYL9_HUMAN	sp|P24844|MYL9_HUMAN	sp|P24844|MYL9_HUMAN	__Other	sp|P24844|MYL9_HUMAN	9	3	3	1	9	3	3	56.4	23.3	23.3	19.827	172	172	0	28.693				1905	0	0	0	MYL9_HUMAN P24844	sp|P24844|MYL9_HUMAN Myosin regulatory light polypeptide 9 OS=Homo sapiens OX=9606 GN=MYL9 PE=1 SV=4	10398	1	0	MYL9	LC20 MLC-2C MLC2 MRLC1 MYRL2	protein-coding	20q11.23	myosin light chain 9 ||| Myosin regulatory light polypeptide 9	.	14.2547	14.2685	15.5283	13.7428	13.8851	13.9019	14.9575	13.7207	13.314	13.8858	1.41126	-0.374174
sp|Q9UNQ0|ABCG2_HUMAN	sp|Q9UNQ0|ABCG2_HUMAN	sp|Q9UNQ0|ABCG2_HUMAN	__Other	sp|Q9UNQ0|ABCG2_HUMAN	6	6	6	1	6	6	6	11	11	11	72.313	655	655	0	32.025				8145	0	0	0	ABCG2_HUMAN Q9UNQ0	sp|Q9UNQ0|ABCG2_HUMAN ATP-binding cassette sub-family G member 2 OS=Homo sapiens OX=9606 GN=ABCG2 PE=1 SV=3	9429	1	0	ABCG2	ABC15 ABCP BCRP BCRP1 BMDP CD338 CDw338 EST157481 GOUT1 MRX MXR MXR-1 MXR1 UAQTL1	protein-coding	4q22.1	ATP binding cassette subfamily G member 2 (Junior blood group) ||| Broad substrate specificity ATP-binding cassette transporter ABCG2	.	13.7636	13.8452	13.5539	13.8177	14.8871	14.5656	13.8963	13.4118	13.2013	12.5856	-0.185994	0.0778166
sp|O15061|SYNEM_HUMAN	sp|O15061|SYNEM_HUMAN	sp|O15061|SYNEM_HUMAN	__Other	sp|O15061|SYNEM_HUMAN	50	50	50	1	50	50	50	37.6	37.6	37.6	172.77	1565	1565	0	249.21				480	0	0	0	SYNEM_HUMAN O15061	sp|O15061|SYNEM_HUMAN Synemin OS=Homo sapiens OX=9606 GN=SYNM PE=1 SV=2	23336	1	0	SYNM	DMN SYN	protein-coding	15q26.3	synemin	.	17.6846	17.7425	17.1931	16.9408	19.0085	16.9987	18.0553	17.033	18.1165	17.3713	-0.396541	-0.648837
sp|Q96DC8|ECHD3_HUMAN	sp|Q96DC8|ECHD3_HUMAN	sp|Q96DC8|ECHD3_HUMAN	__Other	sp|Q96DC8|ECHD3_HUMAN	5	5	5	1	5	5	5	25.4	25.4	25.4	32.633	303	303	0	23.98				5979	0	0	0	ECHD3_HUMAN Q96DC8	sp|Q96DC8|ECHD3_HUMAN Enoyl-CoA hydratase domain-containing protein 3, mitochondrial OS=Homo sapiens OX=9606 GN=ECHDC3 PE=1 SV=2	79746	1	0	ECHDC3	---	protein-coding	10p14	enoyl-CoA hydratase domain containing 3 ||| Enoyl-CoA hydratase domain-containing protein 3, mitochondrial	.	12.1202	12.9784	12.2109	12.9577	13.7851	12.335	14.0317	12.5236	12.0285	12.5886	-0.596739	0.150054
sp|Q9UQ16|DYN3_HUMAN	sp|Q9UQ16|DYN3_HUMAN	sp|Q9UQ16|DYN3_HUMAN	__Other	sp|Q9UQ16|DYN3_HUMAN	19	1	1	1	19	1	1	16.7	1.7	1.7	97.745	869	869	0	3.7963				8188	0	0	0	DYN3_HUMAN Q9UQ16	sp|Q9UQ16|DYN3_HUMAN Dynamin-3 OS=Homo sapiens OX=9606 GN=DNM3 PE=1 SV=4	26052	1	0	DNM3	Dyna-III	protein-coding	1q24.3	dynamin 3 ||| Dynamin-3	.		9.56083	10.375	8.90931	8.71314	8.56	8.02059	8.44735	9.60579	8.8792	1.43622	-0.0294926
sp|Q02487|DSC2_HUMAN;sp|Q14574|DSC3_HUMAN	sp|Q02487|DSC2_HUMAN;sp|Q14574|DSC3_HUMAN	sp|Q02487|DSC2_HUMAN;sp|Q14574|DSC3_HUMAN	__Other	sp|Q02487|DSC2_HUMAN	14;1	14;1	14;1	2	14	14	14	20.2	20.2	20.2	99.961	901	901;896	0	47.1				3097	0	0	0	DSC2_HUMAN Q02487 DSC3_HUMAN Q14574	sp|Q02487|DSC2_HUMAN Desmocollin-2 OS=Homo sapiens OX=9606 GN=DSC2 PE=1 SV=1	1824 1825	2	2	DSC2 DSC3	ARVD11 CDHF2 DG2 DGII/III DSC3 CDHF3 DSC DSC1 DSC2 DSC4 HT-CP	protein-coding	18q12.1	desmocollin 2 ||| Desmocollin-2 ||| desmocollin 3 ||| Desmocollin-3	.	16.5752	16.152	15.5501	16.8941	15.4929	16.3251	15.602	17.3669	15.4285	15.7064	-0.495682	0.848356
sp|Q9UM22|EPDR1_HUMAN	sp|Q9UM22|EPDR1_HUMAN	sp|Q9UM22|EPDR1_HUMAN	__Other	sp|Q9UM22|EPDR1_HUMAN	4	4	4	1	4	4	4	16.5	16.5	16.5	25.437	224	224	0	10.188				8108	0	0	0	EPDR1_HUMAN Q9UM22	sp|Q9UM22|EPDR1_HUMAN Mammalian ependymin-related protein 1 OS=Homo sapiens OX=9606 GN=EPDR1 PE=1 SV=2	54749	1	0	EPDR1	EPDR MERP-1 MERP1 UCC1	protein-coding	7p14.1	ependymin related 1 ||| Mammalian ependymin-related protein 1	.	14.3063	14.9412	13.6957	14.5902	15.7573	14.1295	14.5917	14.5536	15.7983	15.0505	-1.07519	-0.180612
sp|A5D8V6|VP37C_HUMAN	sp|A5D8V6|VP37C_HUMAN	sp|A5D8V6|VP37C_HUMAN	__Other	sp|A5D8V6|VP37C_HUMAN	3	3	3	1	3	3	3	20	20	20	38.658	355	355	0	4.7862				227	0	0	0	VP37C_HUMAN A5D8V6	sp|A5D8V6|VP37C_HUMAN Vacuolar protein sorting-associated protein 37C OS=Homo sapiens OX=9606 GN=VPS37C PE=1 SV=2	55048	1	0	VPS37C	---	protein-coding	11q12.2	VPS37C subunit of ESCRT-I ||| Vacuolar protein sorting-associated protein 37C	.		7.64782	7.92745					6.99344	6.56822	9.05334	0.291832	NA
sp|P13611|CSPG2_HUMAN	sp|P13611|CSPG2_HUMAN	sp|P13611|CSPG2_HUMAN	__Other	sp|P13611|CSPG2_HUMAN	4	4	4	1	4	4	4	1.1	1.1	1.1	372.82	3396	3396	0	3.2621				1605	0	0	0	CSPG2_HUMAN P13611	sp|P13611|CSPG2_HUMAN Versican core protein OS=Homo sapiens OX=9606 GN=VCAN PE=1 SV=3	1462	1	0	VCAN	CSPG2 ERVR GHAP PG-M WGN WGN1	protein-coding	5q14.2-q14.3	versican ||| Versican core protein	.	12.2833	14.4671	15.8624	14.3827	14.4623	13.6216	13.9765	14.718	13.5956	14.7272	1.44413	-0.035638
sp|P0DI83|NARR_HUMAN	sp|P0DI83|NARR_HUMAN	sp|P0DI83|NARR_HUMAN	__Other	sp|P0DI83|NARR_HUMAN	1	1	1	1	1	1	1	9.1	9.1	9.1	21.118	198	198	0	3.3038				1505	0	0	0	NARR_HUMAN P0DI83	sp|P0DI83|NARR_HUMAN Ras-related protein Rab-34, isoform NARR OS=Homo sapiens OX=9606 GN=RAB34 PE=1 SV=1	83871	1	0	RAB34	NARR RAB39 RAH	protein-coding	17q11.2	Isoform of Q9BZG1, Ras-related protein Rab-34, isoform NARR	.	11.5315	9.75535	10.1326	9.73653	10.3704	8.79942	9.61134	8.88688	9.39545	10.9563	0.396489	0.000416616
sp|Q9HB19|PKHA2_HUMAN	sp|Q9HB19|PKHA2_HUMAN	sp|Q9HB19|PKHA2_HUMAN	__Other	sp|Q9HB19|PKHA2_HUMAN	10	10	10	1	10	10	10	27.8	27.8	27.8	47.254	425	425	0	13.376				7216	0	0	0	PKHA2_HUMAN Q9HB19	sp|Q9HB19|PKHA2_HUMAN Pleckstrin homology domain-containing family A member 2 OS=Homo sapiens OX=9606 GN=PLEKHA2 PE=1 SV=2	59339	1	0	PLEKHA2	TAPP2	protein-coding	8p11.22	pleckstrin homology domain containing A2 ||| Pleckstrin homology domain-containing family A member 2	.	15.5016	15.6405	16.2923	15.3349	15.7864	15.5335	14.007	15.0248	16.1983	15.8066	0.794331	-0.163036
sp|Q8IW92|GLBL2_HUMAN	sp|Q8IW92|GLBL2_HUMAN	sp|Q8IW92|GLBL2_HUMAN	__Other	sp|Q8IW92|GLBL2_HUMAN	2	2	2	1	2	2	2	5.5	5.5	5.5	72.078	636	636	0	14.683				4959	0	0	0	GLBL2_HUMAN Q8IW92	sp|Q8IW92|GLBL2_HUMAN Beta-galactosidase-1-like protein 2 OS=Homo sapiens OX=9606 GN=GLB1L2 PE=2 SV=1	89944	1	0	GLB1L2	MST114 MSTP114	protein-coding	11q25	galactosidase beta 1 like 2 ||| Beta-galactosidase-1-like protein 2	.		11.3475	10.821	10.9976	12.4384	11.5409	11.8938	10.6974	10.1866	10.7674	-0.346917	-0.170283
sp|P17707|DCAM_HUMAN	sp|P17707|DCAM_HUMAN	sp|P17707|DCAM_HUMAN	__Other	sp|P17707|DCAM_HUMAN	2	2	2	1	2	2	2	9.9	9.9	9.9	38.339	334	334	0	7.4117				1739	0	0	0	DCAM_HUMAN P17707	sp|P17707|DCAM_HUMAN S-adenosylmethionine decarboxylase proenzyme OS=Homo sapiens OX=9606 GN=AMD1 PE=1 SV=2	262	1	0	AMD1	ADOMETDC AMD SAMDC	protein-coding	6q21	adenosylmethionine decarboxylase 1 ||| S-adenosylmethionine decarboxylase proenzyme	.	11.4113	10.1504	10.2831	9.30592	9.93089	10.1369	9.99528	9.40637	11.6537	10.5455	0.125867	-0.85127
sp|Q6NZI2|CAVN1_HUMAN	sp|Q6NZI2|CAVN1_HUMAN	sp|Q6NZI2|CAVN1_HUMAN	__Other	sp|Q6NZI2|CAVN1_HUMAN	21	21	21	1	21	21	21	42.3	42.3	42.3	43.476	390	390	0	320.55				4395	0	0	0	CAVN1_HUMAN Q6NZI2	sp|Q6NZI2|CAVN1_HUMAN Caveolae-associated protein 1 OS=Homo sapiens OX=9606 GN=CAVIN1 PE=1 SV=1	284119	1	0	CAVIN1	CAVIN CGL4 FKSG13 PTRF cavin-1	protein-coding	17q21.2	caveolae associated protein 1 ||| Caveolae-associated protein 1	.	18.5408	18.494	19.7613	18.7418	18.6199	17.3423	18.1566	17.8202	17.9374	18.5812	1.39123	0.371677
sp|P50440|GATM_HUMAN	sp|P50440|GATM_HUMAN	sp|P50440|GATM_HUMAN	__Other	sp|P50440|GATM_HUMAN	7	7	7	1	7	7	7	22.5	22.5	22.5	48.455	423	423	0	72.819				2477	0	0	0	GATM_HUMAN P50440	sp|P50440|GATM_HUMAN Glycine amidinotransferase, mitochondrial OS=Homo sapiens OX=9606 GN=GATM PE=1 SV=1	2628	1	0	GATM	AGAT AT CCDS3	protein-coding	15q21.1	glycine amidinotransferase ||| Glycine amidinotransferase, mitochondrial	.	14.8121	14.9063	14.1701	14.0902	14.3509	14.3266	15.7619	15.9886	14.4528	14.6022	-0.547791	-0.627712
sp|Q14012|KCC1A_HUMAN	sp|Q14012|KCC1A_HUMAN	sp|Q14012|KCC1A_HUMAN	__Other	sp|Q14012|KCC1A_HUMAN	6	6	3	1	6	6	3	18.1	18.1	10.8	41.337	370	370	0	23.875				3490	0	0	0	KCC1A_HUMAN Q14012	sp|Q14012|KCC1A_HUMAN Calcium/calmodulin-dependent protein kinase type 1 OS=Homo sapiens OX=9606 GN=CAMK1 PE=1 SV=1	8536	1	0	CAMK1	CAMKI	protein-coding	3p25.3	calcium/calmodulin dependent protein kinase I ||| Calcium/calmodulin-dependent protein kinase type 1	.	13.8832	14.9239	15.5176	14.4092	16.2925	14.0595	14.5724	14.5159	14.3609	14.8246	0.698535	-0.409889
sp|Q99607|ELF4_HUMAN	sp|Q99607|ELF4_HUMAN	sp|Q99607|ELF4_HUMAN	__Other	sp|Q99607|ELF4_HUMAN	2	1	1	1	2	1	1	3.2	1.4	1.4	70.729	663	663	0.0059286	1.3543				6414	0	0	0	ELF4_HUMAN Q99607	sp|Q99607|ELF4_HUMAN ETS-related transcription factor Elf-4 OS=Homo sapiens OX=9606 GN=ELF4 PE=1 SV=1	2000	1	0	ELF4	ELFR MEF	protein-coding	Xq26.1	E74 like ETS transcription factor 4 ||| ETS-related transcription factor Elf-4	.	10.2868	10.0105	10.1446	10.5896	9.84599	9.70642	9.51685	8.36351	10.4158	10.5431	0.253843	0.698866
sp|Q9UDR5|AASS_HUMAN	sp|Q9UDR5|AASS_HUMAN	sp|Q9UDR5|AASS_HUMAN	__Other	sp|Q9UDR5|AASS_HUMAN	31	31	31	1	31	31	31	39.8	39.8	39.8	102.13	926	926	0	84.126				7857	0	0	0	AASS_HUMAN Q9UDR5	sp|Q9UDR5|AASS_HUMAN Alpha-aminoadipic semialdehyde synthase, mitochondrial OS=Homo sapiens OX=9606 GN=AASS PE=1 SV=1	10157	1	0	AASS	LKR/SDH LKRSDH LORSDH	protein-coding	7q31.32	aminoadipate-semialdehyde synthase ||| Alpha-aminoadipic semialdehyde synthase, mitochondrial	.	15.7037	17.3919	17.9931	16.8398	18.4996	16.5202	16.5798	17.1485	16.6762	17.6472	0.755072	-0.398283
sp|Q5JRX3|PREP_HUMAN	sp|Q5JRX3|PREP_HUMAN	sp|Q5JRX3|PREP_HUMAN	__Other	sp|Q5JRX3|PREP_HUMAN	46	46	46	1	46	46	46	54.8	54.8	54.8	117.41	1037	1037	0	323.31				4098	0	0	0	PREP_HUMAN Q5JRX3	sp|Q5JRX3|PREP_HUMAN Presequence protease, mitochondrial OS=Homo sapiens OX=9606 GN=PITRM1 PE=1 SV=3	10531	1	0	PITRM1	MP1 PreP	protein-coding	10p15.2	pitrilysin metallopeptidase 1 ||| Presequence protease, mitochondrial	.	18.7497	18.8439	18.7397	18.4713	20.3157	18.7633	19.0221	18.5034	18.3009	17.8044	-0.000374596	-0.268794
sp|O15231|ZN185_HUMAN	sp|O15231|ZN185_HUMAN	sp|O15231|ZN185_HUMAN	__Other	sp|O15231|ZN185_HUMAN	48	48	48	1	48	48	48	72	72	72	73.525	689	689	0	323.31				512	0	0	0	ZN185_HUMAN O15231	sp|O15231|ZN185_HUMAN Zinc finger protein 185 OS=Homo sapiens OX=9606 GN=ZNF185 PE=1 SV=3	7739	1	0	ZNF185	SCELL	protein-coding	Xq28	zinc finger protein 185 with LIM domain ||| Zinc finger protein 185	.	19.1594	18.4399	18.9902	19.4634	17.5123	18.0317	17.3248	18.5398	18.0579	18.7196	0.660199	1.13346
sp|Q5SGD2|PPM1L_HUMAN	sp|Q5SGD2|PPM1L_HUMAN	sp|Q5SGD2|PPM1L_HUMAN	__Other	sp|Q5SGD2|PPM1L_HUMAN	2	2	2	1	2	2	2	12.2	12.2	12.2	41.053	360	360	0.0033113	1.7113				4131	0	0	0	PPM1L_HUMAN Q5SGD2	sp|Q5SGD2|PPM1L_HUMAN Protein phosphatase 1L OS=Homo sapiens OX=9606 GN=PPM1L PE=1 SV=1	151742	1	0	PPM1L	PP2C-epsilon PP2CE PPM1-LIKE	protein-coding	3q25.33-q26.1	protein phosphatase, Mg2+/Mn2+ dependent 1L ||| Protein phosphatase 1L	.		10.5031	10.1747	9.61495	10.9012	10.717	11.6712	9.91842	11.0467	9.69084	-0.292218	-0.851934
sp|Q9UIL1|SCOC_HUMAN	sp|Q9UIL1|SCOC_HUMAN	sp|Q9UIL1|SCOC_HUMAN	__Other	sp|Q9UIL1|SCOC_HUMAN	4	4	4	1	4	4	4	35.2	35.2	35.2	18.045	159	159	0	131.42				7967	0	0	0	SCOC_HUMAN Q9UIL1	sp|Q9UIL1|SCOC_HUMAN Short coiled-coil protein OS=Homo sapiens OX=9606 GN=SCOC PE=1 SV=2	60592	1	0	SCOC	HRIHFB2072 SCOCO UNC-69	protein-coding	4q31.1	short coiled-coil protein	.	13.4775	13.319	13.7474	13.7355	13.6369	13.2404	11.5583	13.5638	13.1829	13.6378	0.459535	0.447636
sp|Q96NY8|NECT4_HUMAN	sp|Q96NY8|NECT4_HUMAN	sp|Q96NY8|NECT4_HUMAN	__Other	sp|Q96NY8|NECT4_HUMAN	5	5	5	1	5	5	5	12	12	12	55.454	510	510	0	16.096				6267	0	0	0	NECT4_HUMAN Q96NY8	sp|Q96NY8|NECT4_HUMAN Nectin-4 OS=Homo sapiens OX=9606 GN=NECTIN4 PE=1 SV=1	81607	1	0	NECTIN4	EDSS1 LNIR PRR4 PVRL4 nectin-4	protein-coding	1q23.3	nectin cell adhesion molecule 4 ||| Nectin-4	.	14.4422	14.6594	14.1461	14.1997	13.4114	15.7929	13.9281	14.7142	13.7023	14.1113	-0.104695	-0.0510913
sp|P55287|CAD11_HUMAN	sp|P55287|CAD11_HUMAN	sp|P55287|CAD11_HUMAN	__Other	sp|P55287|CAD11_HUMAN	5	5	5	1	5	5	5	10.7	10.7	10.7	87.964	796	796	0	12.205				2685	0	0	0	CAD11_HUMAN P55287	sp|P55287|CAD11_HUMAN Cadherin-11 OS=Homo sapiens OX=9606 GN=CDH11 PE=1 SV=2	1009	1	0	CDH11	CAD11 CDHOB ESWS OB OSF-4	protein-coding	16q21	cadherin 11 ||| Cadherin-11	.	13.3431	14.3587	14.9378	13.3228	13.3129	13.4841	14.337	15.0784	14.5783	14.6348	0.72704	-0.887958
sp|Q8NAT1|PMGT2_HUMAN	sp|Q8NAT1|PMGT2_HUMAN	sp|Q8NAT1|PMGT2_HUMAN	__Other	sp|Q8NAT1|PMGT2_HUMAN	3	3	3	1	3	3	3	6.6	6.6	6.6	66.615	580	580	0	5.3536				5257	0	0	0	PMGT2_HUMAN Q8NAT1	sp|Q8NAT1|PMGT2_HUMAN Protein O-linked-mannose beta-1,4-N-acetylglucosaminyltransferase 2 OS=Homo sapiens OX=9606 GN=POMGNT2 PE=1 SV=1	84892	1	0	POMGNT2	AGO61 C3orf39 GTDC2 MDDGA8 MDDGC8	protein-coding	3p22.1	protein O-linked mannose N-acetylglucosaminyltransferase 2 (beta 1,4-) ||| Protein O-linked-mannose beta-1,4-N-acetylglucosaminyltransferase 2	.	11.1963	11.5618	11.001	10.2652	12.5667	11.8156	12.2928	11.3403	11.5179	11.8317	-0.577878	-1.31369
sp|Q9UM54|MYO6_HUMAN	sp|Q9UM54|MYO6_HUMAN	sp|Q9UM54|MYO6_HUMAN	__Other	sp|Q9UM54|MYO6_HUMAN	59	59	59	1	59	59	59	49.1	49.1	49.1	149.69	1294	1294	0	323.31				8110	0	0	0	MYO6_HUMAN Q9UM54	sp|Q9UM54|MYO6_HUMAN Unconventional myosin-VI OS=Homo sapiens OX=9606 GN=MYO6 PE=1 SV=4	4646	1	0	MYO6	DFNA22 DFNB37	protein-coding	6q14.1	myosin VI ||| Unconventional myosin-VI	.	18.9169	18.2739	18.6146	19.1909	17.8366	18.2894	17.6165	19.1029	17.1374	17.8296	0.412351	0.988693
sp|P15559|NQO1_HUMAN	sp|P15559|NQO1_HUMAN	sp|P15559|NQO1_HUMAN	__Other	sp|P15559|NQO1_HUMAN	18	18	18	1	18	18	18	50.4	50.4	50.4	30.867	274	274	0	211.63				1673	0	0	0	NQO1_HUMAN P15559	sp|P15559|NQO1_HUMAN NAD(P)H dehydrogenase [quinone] 1 OS=Homo sapiens OX=9606 GN=NQO1 PE=1 SV=1	1728	1	0	NQO1	DHQU DIA4 DTD NMOR1 NMORI QR1	protein-coding	16q22.1	NAD(P)H quinone dehydrogenase 1 ||| NAD(P)H dehydrogenase [quinone] 1	.	19.1668	18.7584	17.9278	19.6131	18.9748	19.5209	17.6723	18.038	18.684	18.9215	-0.741261	0.944084
sp|P40121|CAPG_HUMAN	sp|P40121|CAPG_HUMAN	sp|P40121|CAPG_HUMAN	__Other	sp|P40121|CAPG_HUMAN	12	12	12	1	12	12	12	47.7	47.7	47.7	38.498	348	348	0	103.86				2217	0	0	0	CAPG_HUMAN P40121	sp|P40121|CAPG_HUMAN Macrophage-capping protein OS=Homo sapiens OX=9606 GN=CAPG PE=1 SV=2	822	1	0	CAPG	AFCP HEL-S-66 MCP	protein-coding	2p11.2	capping actin protein, gelsolin like ||| Macrophage-capping protein	.	17.8203	17.3858	18.033	18.2008	17.4659	16.8431	16.0251	17.8597	17.2384	16.864	0.716729	0.884547
sp|Q6UXT9|ABH15_HUMAN	sp|Q6UXT9|ABH15_HUMAN	sp|Q6UXT9|ABH15_HUMAN	__Other	sp|Q6UXT9|ABH15_HUMAN	3	3	3	1	3	3	3	6.6	6.6	6.6	51.771	468	468	0	3.4382				4527	0	0	0	ABH15_HUMAN Q6UXT9	sp|Q6UXT9|ABH15_HUMAN Protein ABHD15 OS=Homo sapiens OX=9606 GN=ABHD15 PE=1 SV=2	116236	1	0	ABHD15	---	protein-coding	17q11.2	abhydrolase domain containing 15 ||| Protein ABHD15	.	13.5561	13.885	13.4473	12.5259	14.4384	13.9971	14.2189	12.73	14.3202	13.9041	-0.250403	-1.17186
sp|O60315|ZEB2_HUMAN;sp|P37275|ZEB1_HUMAN	sp|P37275|ZEB1_HUMAN;sp|O60315|ZEB2_HUMAN	sp|O60315|ZEB2_HUMAN;sp|P37275|ZEB1_HUMAN	__Other	sp|P37275|ZEB1_HUMAN	5;2	5;2	5;2	2	5	5	5	7.2	7.2	7.2	124.07	1124	1124;1214	0	36.73				2193	0	0	0	ZEB1_HUMAN P37275 ZEB2_HUMAN O60315	sp|P37275|ZEB1_HUMAN Zinc finger E-box-binding homeobox 1 OS=Homo sapiens OX=9606 GN=ZEB1 PE=1 SV=2	6935 9839	2	5	ZEB1 ZEB2	AREB6 BZP DELTAEF1 FECD6 NIL2A PPCD3 TCF8 ZFHEP ZFHX1A HSPC082 SIP-1 SIP1 SMADIP1 ZFHX1B	protein-coding	10p11.22!2q22.3	zinc finger E-box binding homeobox 1 ||| Zinc finger E-box-binding homeobox 1 ||| zinc finger E-box binding homeobox 2 ||| Zinc finger E-box-binding homeobox 2	.	13.2021	13.6398	13.8283	12.8568	14.5433	12.5042	13.6939	12.7844	14.0341	14.0283	0.294177	-0.677389
sp|P06396|GELS_HUMAN;CON__Q3SX14;REV__sp|Q6TDU7|CASC1_HUMAN	sp|P06396|GELS_HUMAN;CON__Q3SX14;REV__sp|Q6TDU7|CASC1_HUMAN	sp|P06396|GELS_HUMAN;CON__Q3SX14;REV__sp|Q6TDU7|CASC1_HUMAN	__REV	sp|P06396|GELS_HUMAN;CON__Q3SX14	26;18;1	26;18;1	26;18;1	3	26	26	26	41.4	41.4	41.4	85.696	782	782;781;716	0	169.56			+	1372	2	0	0	CASC1_HUMAN Q6TDU7 GELS_HUMAN P06396	sp|P06396|GELS_HUMAN Gelsolin OS=Homo sapiens OX=9606 GN=GSN PE=1 SV=1;	55259 2934	2	5	CASC1 GSN	LAS1 PPP1R54 ADF AGEL	protein-coding	12p12.1!9q33.2	cancer susceptibility 1 ||| Protein CASC1 ||| gelsolin	.	17.4533	17.5048	18.5377	17.326	16.842	16.9277	18.1869	17.8346	16.4261	17.0607	1.14496	-0.0667062
sp|P07099|HYEP_HUMAN	sp|P07099|HYEP_HUMAN	sp|P07099|HYEP_HUMAN	__Other	sp|P07099|HYEP_HUMAN	29	29	29	1	29	29	29	60.4	60.4	60.4	52.948	455	455	0	323.31				1390	0	0	0	HYEP_HUMAN P07099	sp|P07099|HYEP_HUMAN Epoxide hydrolase 1 OS=Homo sapiens OX=9606 GN=EPHX1 PE=1 SV=1	2052	1	0	EPHX1	EPHX EPOX HYL1 MEH	protein-coding	1q42.12	epoxide hydrolase 1	.	18.7758	18.5646	18.1417	19.1408	18.5465	19.8328	17.5627	18.4748	18.0576	17.9335	-0.319588	0.67948
sp|P10909|CLUS_HUMAN	sp|P10909|CLUS_HUMAN	sp|P10909|CLUS_HUMAN	__Other	sp|P10909|CLUS_HUMAN	8	8	8	1	8	8	8	22	22	22	52.494	449	449	0	23.332				1541	0	0	0	CLUS_HUMAN P10909	sp|P10909|CLUS_HUMAN Clusterin OS=Homo sapiens OX=9606 GN=CLU PE=1 SV=1	1191	1	0	CLU	AAG4 APO-J APOJ CLI CLU1 CLU2 KUB1 NA1/NA2 SGP-2 SGP2 SP-40 TRPM-2 TRPM2	protein-coding	8p21.1	clusterin	.	15.8796	15.9646	15.9101	15.6147	17.347	15.1171	16.0864	15.9802	15.0915	15.3765	0.0947025	-0.200723
sp|P56385|ATP5I_HUMAN	sp|P56385|ATP5I_HUMAN	sp|P56385|ATP5I_HUMAN	__Other	sp|P56385|ATP5I_HUMAN	5	5	5	1	5	5	5	62.3	62.3	62.3	7.9331	69	69	0	13.814				2710	0	0	0	ATP5I_HUMAN P56385	sp|P56385|ATP5I_HUMAN ATP synthase subunit e, mitochondrial OS=Homo sapiens OX=9606 GN=ATP5ME PE=1 SV=2	521	1	0	ATP5ME	ATP5I ATP5K	protein-coding	4p16.3	ATP synthase membrane subunit e ||| ATP synthase subunit e, mitochondrial	.	15.1821	15.5006	14.0329	15.788	16.327	15.7102	16.0305	15.604	15.6081	14.8464	-1.46044	0.294597
sp|P35527|K1C9_HUMAN;CON__P35527	sp|P35527|K1C9_HUMAN;CON__P35527	sp|P35527|K1C9_HUMAN;CON__P35527	__Other	sp|P35527|K1C9_HUMAN;CON__P35527	25;24	24;23	24;23	2	25	24	24	58.1	58.1	58.1	62.064	623	623;623	0	323.31			+	2142	2	0	0	K1C9_HUMAN P35527	sp|P35527|K1C9_HUMAN Keratin, type I cytoskeletal 9 OS=Homo sapiens OX=9606 GN=KRT9 PE=1 SV=3;	3857	1	0	KRT9	CK-9 EPPK K9	protein-coding	17q21.2	keratin 9 ||| Keratin, type I cytoskeletal 9	.	15.99	16.8144	18.2169	16.1055	16.2968	16.9198	17.8128	16.5589	16.9407	17.2231	1.20756	-0.903802
sp|Q6UVK1|CSPG4_HUMAN	sp|Q6UVK1|CSPG4_HUMAN	sp|Q6UVK1|CSPG4_HUMAN	__Other	sp|Q6UVK1|CSPG4_HUMAN	31	31	31	1	31	31	31	19.9	19.9	19.9	250.53	2322	2322	0	214.52				4504	0	0	0	CSPG4_HUMAN Q6UVK1	sp|Q6UVK1|CSPG4_HUMAN Chondroitin sulfate proteoglycan 4 OS=Homo sapiens OX=9606 GN=CSPG4 PE=1 SV=2	1464	1	0	CSPG4	HMW-MAA MCSP MCSPG MEL-CSPG MSK16 NG2	protein-coding	15q24.2	chondroitin sulfate proteoglycan 4	.	16.6279	16.7276	18.2313	16.3604	16.8064	16.0104	16.1463	16.2963	16.1085	16.7994	1.6364	-0.234425
sp|Q9H4G0|E41L1_HUMAN	sp|Q9H4G0|E41L1_HUMAN	sp|Q9H4G0|E41L1_HUMAN	__Other	sp|Q9H4G0|E41L1_HUMAN	27	26	26	1	27	26	26	38	36.7	36.7	98.502	881	881	0	192.17				7045	0	0	0	E41L1_HUMAN Q9H4G0	sp|Q9H4G0|E41L1_HUMAN Band 4.1-like protein 1 OS=Homo sapiens OX=9606 GN=EPB41L1 PE=1 SV=2	2036	1	0	EPB41L1	4.1N MRD11	protein-coding	20q11.23	erythrocyte membrane protein band 4.1 like 1 ||| Band 4.1-like protein 1	.	17.0682	17.0859	16.4526	17.0664	18.0248	17.957	16.3425	16.898	16.9866	16.0091	-0.514517	0.0992528
sp|O00622|CCN1_HUMAN	sp|O00622|CCN1_HUMAN	sp|O00622|CCN1_HUMAN	__Other	sp|O00622|CCN1_HUMAN	23	23	23	1	23	23	23	70.6	70.6	70.6	42.026	381	381	0	145.21				366	0	0	0	CCN1_HUMAN O00622	sp|O00622|CCN1_HUMAN CCN family member 1 OS=Homo sapiens OX=9606 GN=CCN1 PE=1 SV=1	3491	1	0	CCN1	CYR61 GIG1 IGFBP10	protein-coding	1p22.3	cellular communication network factor 1 ||| CCN family member 1	.	17.6911	17.547	19.0261	17.4	17.4786	16.5117	17.0678	17.0427	17.394	17.4912	1.59958	-0.026529
sp|P18065|IBP2_HUMAN	sp|P18065|IBP2_HUMAN	sp|P18065|IBP2_HUMAN	__Other	sp|P18065|IBP2_HUMAN	7	7	7	1	7	7	7	28.3	28.3	28.3	34.814	325	325	0	21.208				1749	0	0	0	IBP2_HUMAN P18065	sp|P18065|IBP2_HUMAN Insulin-like growth factor-binding protein 2 OS=Homo sapiens OX=9606 GN=IGFBP2 PE=1 SV=2	3485	1	0	IGFBP2	IBP2 IGF-BP53	protein-coding	2q35	insulin like growth factor binding protein 2 ||| Insulin-like growth factor-binding protein 2	.	15.2573	15.0275	14.9523	15.2958	14.9762	16.2861	14.9943	14.9431	13.9908	14.0257	0.0192578	0.362772
sp|Q5T0Z8|CF132_HUMAN	sp|Q5T0Z8|CF132_HUMAN	sp|Q5T0Z8|CF132_HUMAN	__Other	sp|Q5T0Z8|CF132_HUMAN	4	4	4	1	4	4	4	3.3	3.3	3.3	124.03	1188	1188	0	3.9819				4155	0	0	0	CF132_HUMAN Q5T0Z8	sp|Q5T0Z8|CF132_HUMAN Uncharacterized protein C6orf132 OS=Homo sapiens OX=9606 GN=C6orf132 PE=1 SV=4	647024	1	0	C6orf132	bA7K24.2	protein-coding	6p21.1	chromosome 6 open reading frame 132 ||| Uncharacterized protein C6orf132	.	11.8696	12.3128	12.7224	12.8417	11.8856	13.3137	11.3678	13.0544	11.9473	11.6211	0.378127	0.497432
sp|P54652|HSP72_HUMAN	sp|P54652|HSP72_HUMAN	sp|P54652|HSP72_HUMAN	__Other	sp|P54652|HSP72_HUMAN	35	18	16	1	35	18	16	47.9	28	25.4	70.02	639	639	0	61.343				2643	0	0	0	HSP72_HUMAN P54652	sp|P54652|HSP72_HUMAN Heat shock-related 70 kDa protein 2 OS=Homo sapiens OX=9606 GN=HSPA2 PE=1 SV=1	3306	1	0	HSPA2	HSP70-2 HSP70-3	protein-coding	14q23.3	heat shock protein family A (Hsp70) member 2 ||| Heat shock-related 70 kDa protein 2	.	16.3603	16.8728	16.5298	15.9197	17.486	16.0232	17.7418	17.1152	16.966	15.9029	-0.180817	-0.790827
sp|P13631|RARG_HUMAN	sp|P13631|RARG_HUMAN	sp|P13631|RARG_HUMAN	__Other	sp|P13631|RARG_HUMAN	4	4	3	1	4	4	3	10.8	10.8	9	50.341	454	454	0	8.0563				1607	0	0	0	RARG_HUMAN P13631	sp|P13631|RARG_HUMAN Retinoic acid receptor gamma OS=Homo sapiens OX=9606 GN=RARG PE=1 SV=1	5916	1	0	RARG	NR1B3 RARC	protein-coding	12q13.13	retinoic acid receptor gamma	.	14.7797	14.2123	13.7821	15.1992	13.7168	14.313	13.2038	15.2544	14.1797	13.8117	-0.40051	1.01659
sp|Q9P1F3|ABRAL_HUMAN	sp|Q9P1F3|ABRAL_HUMAN	sp|Q9P1F3|ABRAL_HUMAN	__Other	sp|Q9P1F3|ABRAL_HUMAN	4	4	4	1	4	4	4	56.8	56.8	56.8	9.0564	81	81	0	25.895				7747	0	0	0	ABRAL_HUMAN Q9P1F3	sp|Q9P1F3|ABRAL_HUMAN Costars family protein ABRACL OS=Homo sapiens OX=9606 GN=ABRACL PE=1 SV=1	58527	1	0	ABRACL	C6orf115 Costars HSPC280 PRO2013	protein-coding	6q24.1	ABRA C-terminal like ||| Costars family protein ABRACL	.	13.9448	14.6603	14.0377	14.9128	14.1898	14.1563	13.2137	14.8263	15.6012	14.8078	-0.430452	0.44462
sp|P21583|SCF_HUMAN	sp|P21583|SCF_HUMAN	sp|P21583|SCF_HUMAN	__Other	sp|P21583|SCF_HUMAN	1	1	1	1	1	1	1	3.3	3.3	3.3	30.898	273	273	0.0027154	1.8847				1830	0	0	0	SCF_HUMAN P21583	sp|P21583|SCF_HUMAN Kit ligand OS=Homo sapiens OX=9606 GN=KITLG PE=1 SV=1	4254	1	0	KITLG	DCUA DFNA69 FPH2 FPHH KL-1 Kitl MGF SCF SF SHEP7 SLF	protein-coding	12q21.32	KIT ligand	.		11.1277	11.1175	10.7088	11.3401	11.5023	9.89015	11.8399	11.7566	10.1695	0.0769217	-0.331799
sp|Q96HR9|REEP6_HUMAN	sp|Q96HR9|REEP6_HUMAN	sp|Q96HR9|REEP6_HUMAN	__Other	sp|Q96HR9|REEP6_HUMAN	3	3	3	1	3	3	3	14.7	14.7	14.7	23.418	211	211	0	22.895				6129	0	0	0	REEP6_HUMAN Q96HR9	sp|Q96HR9|REEP6_HUMAN Receptor expression-enhancing protein 6 OS=Homo sapiens OX=9606 GN=REEP6 PE=1 SV=2	92840	1	0	REEP6	C19orf32 DP1L1 REEP6.1 REEP6.2 RP77 TB2L1 Yip2f	protein-coding	19p13.3	receptor accessory protein 6 ||| Receptor expression-enhancing protein 6	.	13.7709	12.797	12.3295	13.6026	11.6882	12.6725	13.4193	13.1853	12.4219	11.7625	-0.305719	0.967344
sp|Q8IVL6|P3H3_HUMAN	sp|Q8IVL6|P3H3_HUMAN	sp|Q8IVL6|P3H3_HUMAN	__Other	sp|Q8IVL6|P3H3_HUMAN	14	14	14	1	14	14	14	26.8	26.8	26.8	81.836	736	736	0	52.795				4946	0	0	0	P3H3_HUMAN Q8IVL6	sp|Q8IVL6|P3H3_HUMAN Prolyl 3-hydroxylase 3 OS=Homo sapiens OX=9606 GN=P3H3 PE=1 SV=1	10536	1	0	P3H3	GRCB HSU47926 LEPREL2	protein-coding	12p13.31	prolyl 3-hydroxylase 3	.	15.0732	15.4387	14.8365	14.4782	16.2292	14.5179	15.2812	14.6763	16.1567	15.7295	-0.401688	-0.759992
sp|P12109|CO6A1_HUMAN	sp|P12109|CO6A1_HUMAN	sp|P12109|CO6A1_HUMAN	__Other	sp|P12109|CO6A1_HUMAN	24	24	24	1	24	24	24	32	32	32	108.53	1028	1028	0	250.17				1578	0	0	0	CO6A1_HUMAN P12109	sp|P12109|CO6A1_HUMAN Collagen alpha-1(VI) chain OS=Homo sapiens OX=9606 GN=COL6A1 PE=1 SV=3	1291	1	0	COL6A1	BTHLM1 OPLL UCHMD1	protein-coding	21q22.3	collagen type VI alpha 1 chain ||| Collagen alpha-1(VI) chain	.	16.6374	17.2424	18.0777	17.0103	16.5091	16.1435	16.3815	17.2896	17.4479	17.9535	0.976084	-0.0913436
sp|Q9NS15|LTBP3_HUMAN	sp|Q9NS15|LTBP3_HUMAN	sp|Q9NS15|LTBP3_HUMAN	__Other	sp|Q9NS15|LTBP3_HUMAN	4	4	4	1	4	4	4	4.1	4.1	4.1	139.36	1303	1303	0	12.66				7429	0	0	0	LTBP3_HUMAN Q9NS15	sp|Q9NS15|LTBP3_HUMAN Latent-transforming growth factor beta-binding protein 3 OS=Homo sapiens OX=9606 GN=LTBP3 PE=1 SV=4	4054	1	0	LTBP3	DASS GPHYSD3 LTBP-3 LTBP2 STHAG6 pp6425	protein-coding	11q13.1	latent transforming growth factor beta binding protein 3 ||| Latent-transforming growth factor beta-binding protein 3	.	13.4036	12.6057	12.3736	12.6403	13.4918	11.6607	11.765	13.6123	12.1365	12.5046	-0.149458	0.117187
sp|Q96CG8|CTHR1_HUMAN	sp|Q96CG8|CTHR1_HUMAN	sp|Q96CG8|CTHR1_HUMAN	__Other	sp|Q96CG8|CTHR1_HUMAN	5	5	5	1	5	5	5	21	21	21	26.224	243	243	0	11.63				5949	0	0	0	CTHR1_HUMAN Q96CG8	sp|Q96CG8|CTHR1_HUMAN Collagen triple helix repeat-containing protein 1 OS=Homo sapiens OX=9606 GN=CTHRC1 PE=1 SV=1	115908	1	0	CTHRC1	---	protein-coding	8q22.3	collagen triple helix repeat containing 1 ||| Collagen triple helix repeat-containing protein 1	.	15.8649	15.8057	15.4502	15.8246	16.1718	14.7517	14.829	16.9805	15.7149	15.8682	-0.248651	0.125739
sp|P35222|CTNB1_HUMAN	sp|P35222|CTNB1_HUMAN	sp|P35222|CTNB1_HUMAN	__Other	sp|P35222|CTNB1_HUMAN	32	29	29	1	32	29	29	45.6	41.1	41.1	85.496	781	781	0	299.75				2126	0	0	0	CTNB1_HUMAN P35222	sp|P35222|CTNB1_HUMAN Catenin beta-1 OS=Homo sapiens OX=9606 GN=CTNNB1 PE=1 SV=1	1499	1	0	CTNNB1	CTNNB EVR7 MRD19 NEDSDV armadillo	protein-coding	3p22.1	catenin beta 1 ||| Catenin beta-1	.	18.504	18.4781	18.551	18.9052	19.2162	17.7848	18.0389	19.3692	17.3517	18.0436	0.143415	0.497657
sp|P09382|LEG1_HUMAN	sp|P09382|LEG1_HUMAN	sp|P09382|LEG1_HUMAN	__Other	sp|P09382|LEG1_HUMAN	14	14	14	1	14	14	14	94.1	94.1	94.1	14.716	135	135	0	218.63				1466	0	0	0	LEG1_HUMAN P09382	sp|P09382|LEG1_HUMAN Galectin-1 OS=Homo sapiens OX=9606 GN=LGALS1 PE=1 SV=2	3956	1	0	LGALS1	GAL1 GBP	protein-coding	22q13.1	galectin 1 ||| Galectin-1	.	19.9077	19.9178	20.7504	19.841	19.762	18.4724	19.4511	20.3144	19.4879	20.4807	0.930389	0.0210526
sp|O15156|ZBT7B_HUMAN	sp|O15156|ZBT7B_HUMAN	sp|O15156|ZBT7B_HUMAN	__Other	sp|O15156|ZBT7B_HUMAN	7	7	7	1	7	7	7	13.4	13.4	13.4	58.026	539	539	0	17.122				500	0	0	0	ZBT7B_HUMAN O15156	sp|O15156|ZBT7B_HUMAN Zinc finger and BTB domain-containing protein 7B OS=Homo sapiens OX=9606 GN=ZBTB7B PE=1 SV=2	51043	1	0	ZBTB7B	CKROX THPOK ZBTB15 ZFP-67 ZFP67 ZNF857B c-KROX hcKROX	protein-coding	1q21.3	zinc finger and BTB domain containing 7B ||| Zinc finger and BTB domain-containing protein 7B	.	14.5197	14.3064	13.641	14.4859	13.485	15.2255	13.8646	15.0493	13.9363	13.3139	-0.484198	0.360687
sp|Q92485|ASM3B_HUMAN	sp|Q92485|ASM3B_HUMAN	sp|Q92485|ASM3B_HUMAN	__Other	sp|Q92485|ASM3B_HUMAN	9	9	9	1	9	9	9	27.9	27.9	27.9	50.813	455	455	0	20.262				5666	0	0	0	ASM3B_HUMAN Q92485	sp|Q92485|ASM3B_HUMAN Acid sphingomyelinase-like phosphodiesterase 3b OS=Homo sapiens OX=9606 GN=SMPDL3B PE=1 SV=2	27293	1	0	SMPDL3B	ASML3B	protein-coding	1p35.3	sphingomyelin phosphodiesterase acid like 3B ||| Acid sphingomyelinase-like phosphodiesterase 3b	.	15.7825	15.328	14.6946	15.737	15.3568	16.0319	14.775	16.1818	14.4114	14.4453	-0.509606	0.532741
sp|P50895|BCAM_HUMAN	sp|P50895|BCAM_HUMAN	sp|P50895|BCAM_HUMAN	__Other	sp|P50895|BCAM_HUMAN	22	22	22	1	22	22	22	40.9	40.9	40.9	67.404	628	628	0	91.305				2495	0	0	0	BCAM_HUMAN P50895	sp|P50895|BCAM_HUMAN Basal cell adhesion molecule OS=Homo sapiens OX=9606 GN=BCAM PE=1 SV=2	4059	1	0	BCAM	AU CD239 LU MSK19	protein-coding	19q13.32	basal cell adhesion molecule (Lutheran blood group) ||| Basal cell adhesion molecule	.	16.0024	17.1656	17.2631	16.3182	16.9877	16.1959	16.4753	18.0777	16.8671	17.9772	0.242826	-0.702098
sp|Q6P1M3|L2GL2_HUMAN	sp|Q6P1M3|L2GL2_HUMAN	sp|Q6P1M3|L2GL2_HUMAN	__Other	sp|Q6P1M3|L2GL2_HUMAN	10	10	10	1	10	10	10	12.1	12.1	12.1	113.45	1020	1020	0	32.045				4409	0	0	0	L2GL2_HUMAN Q6P1M3	sp|Q6P1M3|L2GL2_HUMAN LLGL scribble cell polarity complex component 2 OS=Homo sapiens OX=9606 GN=LLGL2 PE=1 SV=2	3993	1	0	LLGL2	HGL Hugl-2 LGL2	protein-coding	17q25.1	LLGL scribble cell polarity complex component 2	.	16.0204	15.5964	15.2856	15.9354	14.9642	16.703	15.2228	16.3622	14.9184	14.8201	-0.240828	0.408969
sp|Q9H479|FN3K_HUMAN	sp|Q9H479|FN3K_HUMAN	sp|Q9H479|FN3K_HUMAN	__Other	sp|Q9H479|FN3K_HUMAN	5	5	5	1	5	5	5	23.3	23.3	23.3	35.171	309	309	0	11.924				7032	0	0	0	FN3K_HUMAN Q9H479	sp|Q9H479|FN3K_HUMAN Fructosamine-3-kinase OS=Homo sapiens OX=9606 GN=FN3K PE=1 SV=1	64122	1	0	FN3K	---	protein-coding	17q25.3	fructosamine 3 kinase ||| Fructosamine-3-kinase	.	12.1524	13.6687	13.0751	13.4492	13.2273	14.8235	12.6488	13.4236	12.952	14.229	-0.403445	-0.0293921
sp|P01135|TGFA_HUMAN	sp|P01135|TGFA_HUMAN	sp|P01135|TGFA_HUMAN	__Other	sp|P01135|TGFA_HUMAN	1	1	1	1	1	1	1	6.2	6.2	6.2	17.006	160	160	0.00075254	2.2765				1270	0	0	0	TGFA_HUMAN P01135	sp|P01135|TGFA_HUMAN Protransforming growth factor alpha OS=Homo sapiens OX=9606 GN=TGFA PE=1 SV=1	7039	1	0	TGFA	TFGA	protein-coding	2p13.3	transforming growth factor alpha ||| Protransforming growth factor alpha	.	11.3871	11.041	10.2102	11.8696	10.3495	10.8986	10.288	11.6621	10.3429	9.94595	-0.485663	1.17371
sp|Q8TE68|ES8L1_HUMAN	sp|Q8TE68|ES8L1_HUMAN	sp|Q8TE68|ES8L1_HUMAN	__Other	sp|Q8TE68|ES8L1_HUMAN	2	2	2	1	2	2	2	2.4	2.4	2.4	80.25	723	723	0.0043737	1.4729				5502	0	0	0	ES8L1_HUMAN Q8TE68	sp|Q8TE68|ES8L1_HUMAN Epidermal growth factor receptor kinase substrate 8-like protein 1 OS=Homo sapiens OX=9606 GN=EPS8L1 PE=1 SV=3	54869	1	0	EPS8L1	DRC3 EPS8R1 PP10566	protein-coding	19q13.42	EPS8 like 1 ||| Epidermal growth factor receptor kinase substrate 8-like protein 1	.	13.4008	13.3235	12.7583	14.0326	13.0106	13.7408	12.5014	14.12	12.5183	12.4463	-0.382731	0.891607
sp|O14786|NRP1_HUMAN	sp|O14786|NRP1_HUMAN	sp|O14786|NRP1_HUMAN	__Other	sp|O14786|NRP1_HUMAN	27	27	27	1	27	27	27	37.8	37.8	37.8	103.13	923	923	0	323.31				431	0	0	0	NRP1_HUMAN O14786	sp|O14786|NRP1_HUMAN Neuropilin-1 OS=Homo sapiens OX=9606 GN=NRP1 PE=1 SV=3	8829	1	0	NRP1	BDCA4 CD304 NP1 NRP VEGF165R	protein-coding	10p11.22	neuropilin 1 ||| Neuropilin-1	.	17.8604	17.4084	17.8632	18.1514	17.7949	16.2914	16.2959	17.0893	17.7412	17.4043	0.534284	0.822405
sp|Q99685|MGLL_HUMAN	sp|Q99685|MGLL_HUMAN	sp|Q99685|MGLL_HUMAN	__Other	sp|Q99685|MGLL_HUMAN	7	7	7	1	7	7	7	28.4	28.4	28.4	33.261	303	303	0	37.254				6432	0	0	0	MGLL_HUMAN Q99685	sp|Q99685|MGLL_HUMAN Monoglyceride lipase OS=Homo sapiens OX=9606 GN=MGLL PE=1 SV=2	11343	1	0	MGLL	HU-K5 HUK5 MAGL MGL	protein-coding	3q21.3	monoglyceride lipase	.	15.3027	13.9418	14.4785	15.2663	13.1609	13.8866	13.1455	13.7006	13.705	13.4778	0.625859	1.41361
sp|P14621|ACYP2_HUMAN	sp|P14621|ACYP2_HUMAN	sp|P14621|ACYP2_HUMAN	__Other	sp|P14621|ACYP2_HUMAN	2	2	2	1	2	2	2	17.2	17.2	17.2	11.139	99	99	0.00075103	2.2228				1640	0	0	0	ACYP2_HUMAN P14621	sp|P14621|ACYP2_HUMAN Acylphosphatase-2 OS=Homo sapiens OX=9606 GN=ACYP2 PE=1 SV=2	98	1	0	ACYP2	ACYM ACYP	protein-coding	2p16.2	acylphosphatase 2 ||| Acylphosphatase-2	.	13.3076	12.9441	13.3237	13.0005	11.4811	12.167	13.4406	13.6057	13.0529	12.8601	0.457279	0.134086
sp|Q52LW3|RHG29_HUMAN	sp|Q52LW3|RHG29_HUMAN	sp|Q52LW3|RHG29_HUMAN	__Other	sp|Q52LW3|RHG29_HUMAN	27	27	27	1	27	27	27	25.8	25.8	25.8	142.06	1261	1261	0	122.36				4010	0	0	0	RHG29_HUMAN Q52LW3	sp|Q52LW3|RHG29_HUMAN Rho GTPase-activating protein 29 OS=Homo sapiens OX=9606 GN=ARHGAP29 PE=1 SV=2	9411	1	0	ARHGAP29	PARG1	protein-coding	1p22.1	Rho GTPase activating protein 29 ||| Rho GTPase-activating protein 29	.	17.621	17.1518	18.3004	17.4639	16.3213	16.1171	16.432	17.2106	16.8186	17.071	1.33355	0.497015
sp|P20962|PTMS_HUMAN	sp|P20962|PTMS_HUMAN	sp|P20962|PTMS_HUMAN	__Other	sp|P20962|PTMS_HUMAN	5	5	5	1	5	5	5	23.5	23.5	23.5	11.53	102	102	0	18.915				1819	0	0	0	PTMS_HUMAN P20962	sp|P20962|PTMS_HUMAN Parathymosin OS=Homo sapiens OX=9606 GN=PTMS PE=1 SV=2	5763	1	0	PTMS	ParaT	protein-coding	12p13.31	parathymosin	.	15.4233	16.1691	16.6592	15.704	15.8093	15.0821	17.319	15.9014	15.556	16.4658	0.597064	-0.358125
sp|P15121|ALDR_HUMAN	sp|P15121|ALDR_HUMAN	sp|P15121|ALDR_HUMAN	__Other	sp|P15121|ALDR_HUMAN	17	17	16	1	17	17	16	58.9	58.9	56.3	35.853	316	316	0	174.84				1656	0	0	0	ALDR_HUMAN P15121	sp|P15121|ALDR_HUMAN Aldo-keto reductase family 1 member B1 OS=Homo sapiens OX=9606 GN=AKR1B1 PE=1 SV=3	231	1	0	AKR1B1	ADR ALDR1 ALR2 AR	protein-coding	7q33	aldo-keto reductase family 1 member B ||| Aldo-keto reductase family 1 member B1	.	17.7455	18.3696	18.3	17.502	18.5059	18.6013	17.8666	17.2607	19.5247	18.0282	0.101319	-0.696707
sp|Q96M96|FGD4_HUMAN	sp|Q96M96|FGD4_HUMAN	sp|Q96M96|FGD4_HUMAN	__Other	sp|Q96M96|FGD4_HUMAN	4	4	4	1	4	4	4	7.8	7.8	7.8	86.625	766	766	0	5.8028				6232	0	0	0	FGD4_HUMAN Q96M96	sp|Q96M96|FGD4_HUMAN FYVE, RhoGEF and PH domain-containing protein 4 OS=Homo sapiens OX=9606 GN=FGD4 PE=1 SV=2	121512	1	0	FGD4	CMT4H FRABP ZFYVE6	protein-coding	12p11.21	FYVE, RhoGEF and PH domain containing 4 ||| FYVE, RhoGEF and PH domain-containing protein 4	.	12.1235	11.8732	11.8883	12.3843	12.1388	11.916	11.0409	12.1619	10.2409	11.7147	0.202608	0.698553
sp|Q9H3G5|CPVL_HUMAN	sp|Q9H3G5|CPVL_HUMAN	sp|Q9H3G5|CPVL_HUMAN	__Other	sp|Q9H3G5|CPVL_HUMAN	1	1	1	1	1	1	1	2.9	2.9	2.9	54.163	476	476	0	4.454				7005	0	0	0	CPVL_HUMAN Q9H3G5	sp|Q9H3G5|CPVL_HUMAN Probable serine carboxypeptidase CPVL OS=Homo sapiens OX=9606 GN=CPVL PE=1 SV=2	54504	1	0	CPVL	HVLP	protein-coding	7p14.3	carboxypeptidase vitellogenic like ||| Probable serine carboxypeptidase CPVL	.	12.4614	12.2553	11.5538	11.6291	13.3141	11.833	13.0297	11.7155	11.4461	12.1664	-0.53215	-0.456883
sp|Q14914|PTGR1_HUMAN	sp|Q14914|PTGR1_HUMAN	sp|Q14914|PTGR1_HUMAN	__Other	sp|Q14914|PTGR1_HUMAN	19	19	19	1	19	19	19	66.3	66.3	66.3	35.869	329	329	0	261.05				3625	0	0	0	PTGR1_HUMAN Q14914	sp|Q14914|PTGR1_HUMAN Prostaglandin reductase 1 OS=Homo sapiens OX=9606 GN=PTGR1 PE=1 SV=2	22949	1	0	PTGR1	LTB4DH PGR1 ZADH3	protein-coding	9q31.3	prostaglandin reductase 1	.	19.0824	18.2852	18.5206	19.3269	18.2323	18.3516	17.2064	17.2717	18.7131	18.2473	0.286894	1.09312
sp|Q9NSU2|TREX1_HUMAN	sp|Q9NSU2|TREX1_HUMAN	sp|Q9NSU2|TREX1_HUMAN	__Other	sp|Q9NSU2|TREX1_HUMAN	2	2	2	1	2	2	2	6.7	6.7	6.7	33.212	314	314	0	6.2909				7450	0	0	0	TREX1_HUMAN Q9NSU2	sp|Q9NSU2|TREX1_HUMAN Three-prime repair exonuclease 1 OS=Homo sapiens OX=9606 GN=TREX1 PE=1 SV=2	11277	1	0	TREX1	AGS1 CRV DRN3 HERNS	protein-coding	3p21.31	three prime repair exonuclease 1 ||| Three-prime repair exonuclease 1	.	12.2377	12.6145	12.6332	12.8072	12.9442	13.4928	11.3197	12.7506	12.8383	11.6852	0.0742899	0.248298
sp|O95833|CLIC3_HUMAN	sp|O95833|CLIC3_HUMAN	sp|O95833|CLIC3_HUMAN	__Other	sp|O95833|CLIC3_HUMAN	10	10	10	1	10	10	10	62.3	62.3	62.3	26.648	236	236	0	33.551				1202	0	0	0	CLIC3_HUMAN O95833	sp|O95833|CLIC3_HUMAN Chloride intracellular channel protein 3 OS=Homo sapiens OX=9606 GN=CLIC3 PE=1 SV=2	9022	1	0	CLIC3	---	protein-coding	9q34.3	chloride intracellular channel 3 ||| Chloride intracellular channel protein 3	.	15.2901	15.1264	16.7123	15.012	14.714	14.6116	14.5545	15.0348	14.7403	14.741	1.69721	-0.00307167
sp|Q9Y6N5|SQOR_HUMAN	sp|Q9Y6N5|SQOR_HUMAN	sp|Q9Y6N5|SQOR_HUMAN	__Other	sp|Q9Y6N5|SQOR_HUMAN	29	29	29	1	29	29	29	57.3	57.3	57.3	49.96	450	450	0	186.93				8552	0	0	0	SQOR_HUMAN Q9Y6N5	sp|Q9Y6N5|SQOR_HUMAN Sulfide:quinone oxidoreductase, mitochondrial OS=Homo sapiens OX=9606 GN=SQOR PE=1 SV=1	58472	1	0	SQOR	CGI-44 PRO1975 SQR SQRDL	protein-coding	15q21.1	sulfide quinone oxidoreductase ||| Sulfide:quinone oxidoreductase, mitochondrial	.	18.809	18.0437	17.8544	18.9819	17.7029	19.1574	17.5743	17.2548	17.8388	17.4294	-0.119794	1.00765
sp|Q6ZN28|MACC1_HUMAN	sp|Q6ZN28|MACC1_HUMAN	sp|Q6ZN28|MACC1_HUMAN	__Other	sp|Q6ZN28|MACC1_HUMAN	2	2	2	1	2	2	2	4.5	4.5	4.5	96.638	852	852	0	3.3155				4557	0	0	0	MACC1_HUMAN Q6ZN28	sp|Q6ZN28|MACC1_HUMAN Metastasis-associated in colon cancer protein 1 OS=Homo sapiens OX=9606 GN=MACC1 PE=1 SV=2	346389	1	0	MACC1	7A5 SH3BP4L	protein-coding	7p21.1	MET transcriptional regulator MACC1 ||| Metastasis-associated in colon cancer protein 1	.		9.797	10.0461	8.90761	8.85269	10.3607	9.46643	10.8247	9.40986	9.23288	0.40846	-0.730016
sp|O95832|CLD1_HUMAN	sp|O95832|CLD1_HUMAN	sp|O95832|CLD1_HUMAN	__Other	sp|O95832|CLD1_HUMAN	3	3	3	1	3	3	3	9.5	9.5	9.5	22.744	211	211	0.0062688	1.29				1201	0	0	0	CLD1_HUMAN O95832	sp|O95832|CLD1_HUMAN Claudin-1 OS=Homo sapiens OX=9606 GN=CLDN1 PE=1 SV=1	9076	1	0	CLDN1	CLD1 ILVASC SEMP1	protein-coding	3q28	claudin 1 ||| Claudin-1	.	12.6534	13.878	13.4687	12.9386	13.4915	14.592	14.6128	12.6839	13.6385	14.0879	-0.220543	-0.750626
[truncated: 7,776 more rows]
[truncated: 12 more columns]
