# Supplementary material for: Cell Type–specific Adaptive Signaling Responses to KRASG12C Inhibition
Source: Oxford University Press journal article supplement (doi:10.1158/1078-0432.ccr-20-3872), 2021-02-22
Supplement: 10780432ccr203872-sup-252918_4_supp_6912875_qwcb39.xlsx [file 10780432ccr203872-sup-252918_4_supp_6912875_qwcb39.xlsx]

## Sheet: tgfb-emt_signature_proteins
Supplementary Table S8. The TGFβ-EMT analysis of 8 KRASG12C lung cancer cell lines.
Symbol_TGFB-105	Sign_TGFB-105	GeneID_TGFB-105	RowIdentifier	Accession_Protein	Fasta headers	GeneID	Symbol	Alias	Type	Location	Description
TGFB1I1	1	7041	sp~O43294~TGFI1_HUMAN	TGFI1_HUMAN O43294	sp|O43294|TGFI1_HUMAN Transforming growth factor beta-1-induced transcript 1 protein OS=Homo sapiens OX=9606 GN=TGFB1I1 PE=1 SV=2	7041	TGFB1I1	ARA55 HIC-5 HIC5 TSC-5	protein-coding	16p11.2	transforming growth factor beta 1 induced transcript 1 ||| Transforming growth factor beta-1-induced transcript 1 protein
TRIO	1	7204	sp~O75962~TRIO_HUMAN	TRIO_HUMAN O75962	sp|O75962|TRIO_HUMAN Triple functional domain protein OS=Homo sapiens OX=9606 GN=TRIO PE=1 SV=2	7204	TRIO	ARHGEF23 MEBAS MRD44 tgat	protein-coding	5p15.2	trio Rho guanine nucleotide exchange factor ||| Triple functional domain protein
SERPINE1	1	5054	sp~P05121~PAI1_HUMAN	PAI1_HUMAN P05121	sp|P05121|PAI1_HUMAN Plasminogen activator inhibitor 1 OS=Homo sapiens OX=9606 GN=SERPINE1 PE=1 SV=1	5054	SERPINE1	PAI PAI-1 PAI1 PLANH1	protein-coding	7q22.1	serpin family E member 1 ||| Plasminogen activator inhibitor 1
ITGA5	1	3678	sp~P08648~ITA5_HUMAN	ITA5_HUMAN P08648	sp|P08648|ITA5_HUMAN Integrin alpha-5 OS=Homo sapiens OX=9606 GN=ITGA5 PE=1 SV=2	3678	ITGA5	CD49e FNRA VLA-5 VLA5A	protein-coding	12q13.13	integrin subunit alpha 5 ||| Integrin alpha-5
TPM1	1	7168	sp~P09493~TPM1_HUMAN	TPM1_HUMAN P09493	sp|P09493|TPM1_HUMAN Tropomyosin alpha-1 chain OS=Homo sapiens OX=9606 GN=TPM1 PE=1 SV=2	7168	TPM1	C15orf13 CMD1Y CMH3 HEL-S-265 HTM-alpha LVNC9 TMSA	protein-coding	15q22.2	tropomyosin 1 ||| Tropomyosin alpha-1 chain
SKIL	1	6498	sp~P12757~SKIL_HUMAN	SKIL_HUMAN P12757	sp|P12757|SKIL_HUMAN Ski-like protein OS=Homo sapiens OX=9606 GN=SKIL PE=1 SV=2	6498	SKIL	SNO SnoA SnoI SnoN	protein-coding	3q26.2	SKI like proto-oncogene ||| Ski-like protein
ACTN1	1	87	sp~P12814~ACTN1_HUMAN	ACTN1_HUMAN P12814	sp|P12814|ACTN1_HUMAN Alpha-actinin-1 OS=Homo sapiens OX=9606 GN=ACTN1 PE=1 SV=2	87	ACTN1	BDPLT15	protein-coding	14q24.1|14q22-q24	actinin alpha 1 ||| Alpha-actinin-1
BMP1	1	649	sp~P13497~BMP1_HUMAN	BMP1_HUMAN P13497	sp|P13497|BMP1_HUMAN Bone morphogenetic protein 1 OS=Homo sapiens OX=9606 GN=BMP1 PE=1 SV=2	649	BMP1	OI13 PCOLC PCP PCP2 TLD	protein-coding	8p21.3	bone morphogenetic protein 1
VCAN	1	1462	sp~P13611~CSPG2_HUMAN	CSPG2_HUMAN P13611	sp|P13611|CSPG2_HUMAN Versican core protein OS=Homo sapiens OX=9606 GN=VCAN PE=1 SV=3	1462	VCAN	CSPG2 ERVR GHAP PG-M WGN WGN1	protein-coding	5q14.2-q14.3	versican ||| Versican core protein
TIMP2	1	7077	sp~P16035~TIMP2_HUMAN	TIMP2_HUMAN P16035	sp|P16035|TIMP2_HUMAN Metalloproteinase inhibitor 2 OS=Homo sapiens OX=9606 GN=TIMP2 PE=1 SV=2	7077	TIMP2	CSC-21K DDC8	protein-coding	17q25.3	TIMP metallopeptidase inhibitor 2 ||| Metalloproteinase inhibitor 2
JUNB	1	3726	sp~P17275~JUNB_HUMAN	JUNB_HUMAN P17275	sp|P17275|JUNB_HUMAN Transcription factor jun-B OS=Homo sapiens OX=9606 GN=JUNB PE=1 SV=1	3726	JUNB	AP-1	protein-coding	19p13.13	JunB proto-oncogene, AP-1 transcription factor subunit ||| Transcription factor jun-B
FLNA	1	2316	sp~P21333~FLNA_HUMAN	FLNA_HUMAN P21333	sp|P21333|FLNA_HUMAN Filamin-A OS=Homo sapiens OX=9606 GN=FLNA PE=1 SV=4	2316	FLNA	ABP-280 ABPX CSBS CVD1 FGS2 FLN FLN-A FLN1 FMD MNS NHBP OPD OPD1 OPD2 XLVD XMVD	protein-coding	Xq28	filamin A ||| Filamin-A
TGFBR1	1	7046	sp~P36897~TGFR1_HUMAN	TGFR1_HUMAN P36897	sp|P36897|TGFR1_HUMAN TGF-beta receptor type-1 OS=Homo sapiens OX=9606 GN=TGFBR1 PE=1 SV=1	7046	TGFBR1	AAT5 ACVRLK4 ALK-5 ALK5 ESS1 LDS1 LDS1A LDS2A MSSE SKR4 TBR-i TBRI TGFR-1 tbetaR-I	protein-coding	9q22.33	transforming growth factor beta receptor 1 ||| TGF-beta receptor type-1
MUC5AC	-1	4586	sp~P98088~MUC5A_HUMAN	MUC5A_HUMAN P98088	sp|P98088|MUC5A_HUMAN Mucin-5AC OS=Homo sapiens OX=9606 GN=MUC5AC PE=1 SV=4	4586	MUC5AC	MUC5 TBM leB mucin	protein-coding	11p15.5	mucin 5AC, oligomeric mucus/gel-forming ||| Mucin-5AC
COL7A1	1	1294	sp~Q02388~CO7A1_HUMAN	CO7A1_HUMAN Q02388	sp|Q02388|CO7A1_HUMAN Collagen alpha-1(VII) chain OS=Homo sapiens OX=9606 GN=COL7A1 PE=1 SV=2	1294	COL7A1	EBD1 EBDCT EBR1 NDNC8	protein-coding	3p21.31	collagen type VII alpha 1 chain ||| Collagen alpha-1(VII) chain
PLAUR	1	5329	sp~Q03405~UPAR_HUMAN	UPAR_HUMAN Q03405	sp|Q03405|UPAR_HUMAN Urokinase plasminogen activator surface receptor OS=Homo sapiens OX=9606 GN=PLAUR PE=1 SV=1	5329	PLAUR	CD87 U-PAR UPAR URKR	protein-coding	19q13.31	plasminogen activator, urokinase receptor ||| Urokinase plasminogen activator surface receptor
ZFP36L1	1	677	sp~Q07352~TISB_HUMAN	TISB_HUMAN Q07352	sp|Q07352|TISB_HUMAN mRNA decay activator protein ZFP36L1 OS=Homo sapiens OX=9606 GN=ZFP36L1 PE=1 SV=1	677	ZFP36L1	BRF1 Berg36 ERF-1 ERF1 RNF162B TIS11B cMG1	protein-coding	14q24.1	ZFP36 ring finger protein like 1 ||| mRNA decay activator protein ZFP36L1
GALNT2	1	2590	sp~Q10471~GALT2_HUMAN	GALT2_HUMAN Q10471	sp|Q10471|GALT2_HUMAN Polypeptide N-acetylgalactosaminyltransferase 2 OS=Homo sapiens OX=9606 GN=GALNT2 PE=1 SV=1	2590	GALNT2	GalNAc-T2	protein-coding	1q42.13	polypeptide N-acetylgalactosaminyltransferase 2
LAMC2	1	3918	sp~Q13753~LAMC2_HUMAN	LAMC2_HUMAN Q13753	sp|Q13753|LAMC2_HUMAN Laminin subunit gamma-2 OS=Homo sapiens OX=9606 GN=LAMC2 PE=1 SV=2	3918	LAMC2	B2T BM600 CSF EBR2 EBR2A LAMB2T LAMNB2	protein-coding	1q25.3	laminin subunit gamma 2 ||| Laminin subunit gamma-2
LTBP1	1	4052	sp~Q14766~LTBP1_HUMAN	LTBP1_HUMAN Q14766	sp|Q14766|LTBP1_HUMAN Latent-transforming growth factor beta-binding protein 1 OS=Homo sapiens OX=9606 GN=LTBP1 PE=1 SV=4	4052	LTBP1	---	protein-coding	2p22.3	latent transforming growth factor beta binding protein 1 ||| Latent-transforming growth factor beta-binding protein 1
PEA15	1	8682	sp~Q15121~PEA15_HUMAN	PEA15_HUMAN Q15121	sp|Q15121|PEA15_HUMAN Astrocytic phosphoprotein PEA-15 OS=Homo sapiens OX=9606 GN=PEA15 PE=1 SV=2	8682	PEA15	HMAT1 HUMMAT1H MAT1 MAT1H PEA-15 PED PED-PEA15 PED/PEA15	protein-coding	1q23.2	proliferation and apoptosis adaptor protein 15 ||| Astrocytic phosphoprotein PEA-15
MAPRE2	-1	10982	sp~Q15555~MARE2_HUMAN	MARE2_HUMAN Q15555	sp|Q15555|MARE2_HUMAN Microtubule-associated protein RP/EB family member 2 OS=Homo sapiens OX=9606 GN=MAPRE2 PE=1 SV=1	10982	MAPRE2	CSCSC2 EB1 EB2 RP1	protein-coding	18q12.1-q12.2	microtubule associated protein RP/EB family member 2 ||| Microtubule-associated protein RP/EB family member 2
DBN1	1	1627	sp~Q16643~DREB_HUMAN	DREB_HUMAN Q16643	sp|Q16643|DREB_HUMAN Drebrin OS=Homo sapiens OX=9606 GN=DBN1 PE=1 SV=4	1627	DBN1	D0S117E	protein-coding	5q35.3	drebrin 1 ||| Drebrin
TP53I3	1	9540	sp~Q53FA7~QORX_HUMAN	QORX_HUMAN Q53FA7	sp|Q53FA7|QORX_HUMAN Quinone oxidoreductase PIG3 OS=Homo sapiens OX=9606 GN=TP53I3 PE=1 SV=2	9540	TP53I3	PIG3	protein-coding	2p23.3	tumor protein p53 inducible protein 3 ||| Quinone oxidoreductase PIG3
PPP1R18	1	170954	sp~Q6NYC8~PPR18_HUMAN	PPR18_HUMAN Q6NYC8	sp|Q6NYC8|PPR18_HUMAN Phostensin OS=Homo sapiens OX=9606 GN=PPP1R18 PE=1 SV=1	170954	PPP1R18	HKMT1098 KIAA1949	protein-coding	6p21.33	protein phosphatase 1 regulatory subunit 18 ||| Phostensin
ARHGEF18	1	23370	sp~Q6ZSZ5~ARHGI_HUMAN	ARHGI_HUMAN Q6ZSZ5	sp|Q6ZSZ5|ARHGI_HUMAN Rho guanine nucleotide exchange factor 18 OS=Homo sapiens OX=9606 GN=ARHGEF18 PE=1 SV=4	23370	ARHGEF18	P114-RhoGEF RP78 SA-RhoGEF p114RhoGEF	protein-coding	19p13.2	Rho/Rac guanine nucleotide exchange factor 18 ||| Rho guanine nucleotide exchange factor 18
MBOAT2	1	129642	sp~Q6ZWT7~MBOA2_HUMAN	MBOA2_HUMAN Q6ZWT7	sp|Q6ZWT7|MBOA2_HUMAN Lysophospholipid acyltransferase 2 OS=Homo sapiens OX=9606 GN=MBOAT2 PE=2 SV=2	129642	MBOAT2	LPAAT LPCAT4 LPEAT LPLAT-2 OACT2	protein-coding	2p25.1	membrane bound O-acyltransferase domain containing 2 ||| Lysophospholipid acyltransferase 2
EEPD1	1	80820	sp~Q7L9B9~EEPD1_HUMAN	EEPD1_HUMAN Q7L9B9	sp|Q7L9B9|EEPD1_HUMAN Endonuclease/exonuclease/phosphatase family domain-containing protein 1 OS=Homo sapiens OX=9606 GN=EEPD1 PE=1 SV=2	80820	EEPD1	HSPC107	protein-coding	7p14.2	endonuclease/exonuclease/phosphatase family domain containing 1 ||| Endonuclease/exonuclease/phosphatase family domain-containing protein 1
CHST3	1	9469	sp~Q7LGC8~CHST3_HUMAN	CHST3_HUMAN Q7LGC8	sp|Q7LGC8|CHST3_HUMAN Carbohydrate sulfotransferase 3 OS=Homo sapiens OX=9606 GN=CHST3 PE=1 SV=3	9469	CHST3	C6ST C6ST1 HSD	protein-coding	10q22.1	carbohydrate sulfotransferase 3
ANKLE2	1	23141	sp~Q86XL3~ANKL2_HUMAN	ANKL2_HUMAN Q86XL3	sp|Q86XL3|ANKL2_HUMAN Ankyrin repeat and LEM domain-containing protein 2 OS=Homo sapiens OX=9606 GN=ANKLE2 PE=1 SV=4	23141	ANKLE2	KIAA0692 LEMD7 Lem4 MCPH16	protein-coding	12q24.33	ankyrin repeat and LEM domain containing 2 ||| Ankyrin repeat and LEM domain-containing protein 2
AFAP1L2	1	84632	sp~Q8N4X5~AF1L2_HUMAN	AF1L2_HUMAN Q8N4X5	sp|Q8N4X5|AF1L2_HUMAN Actin filament-associated protein 1-like 2 OS=Homo sapiens OX=9606 GN=AFAP1L2 PE=1 SV=1	84632	AFAP1L2	CTB-1144G6.4 KIAA1914 XB130	protein-coding	10q25.3	actin filament associated protein 1 like 2 ||| Actin filament-associated protein 1-like 2
NAV1	1	89796	sp~Q8NEY1~NAV1_HUMAN	NAV1_HUMAN Q8NEY1	sp|Q8NEY1|NAV1_HUMAN Neuron navigator 1 OS=Homo sapiens OX=9606 GN=NAV1 PE=1 SV=2	89796	NAV1	POMFIL3 STEERIN1 UNC53H1	protein-coding	1q32.1	neuron navigator 1
EXOC6	-1	54536	sp~Q8TAG9~EXOC6_HUMAN	EXOC6_HUMAN Q8TAG9	sp|Q8TAG9|EXOC6_HUMAN Exocyst complex component 6 OS=Homo sapiens OX=9606 GN=EXOC6 PE=1 SV=3	54536	EXOC6	EXOC6A SEC15 SEC15L SEC15L1 SEC15L3 Sec15p	protein-coding	10q23.33	exocyst complex component 6
DEPTOR	-1	64798	sp~Q8TB45~DPTOR_HUMAN	DPTOR_HUMAN Q8TB45	sp|Q8TB45|DPTOR_HUMAN DEP domain-containing mTOR-interacting protein OS=Homo sapiens OX=9606 GN=DEPTOR PE=1 SV=2	64798	DEPTOR	DEP.6 DEPDC6	protein-coding	8q24.12	DEP domain containing MTOR interacting protein ||| DEP domain-containing mTOR-interacting protein
TRMT10A	-1	93587	sp~Q8TBZ6~TM10A_HUMAN	TM10A_HUMAN Q8TBZ6	sp|Q8TBZ6|TM10A_HUMAN tRNA methyltransferase 10 homolog A OS=Homo sapiens OX=9606 GN=TRMT10A PE=1 SV=1	93587	TRMT10A	HEL-S-88 MSSGM MSSGM1 RG9MTD2 TRM10	protein-coding	4q23	tRNA methyltransferase 10A ||| tRNA methyltransferase 10 homolog A
ARHGEF40	1	55701	sp~Q8TER5~ARH40_HUMAN	ARH40_HUMAN Q8TER5	sp|Q8TER5|ARH40_HUMAN Rho guanine nucleotide exchange factor 40 OS=Homo sapiens OX=9606 GN=ARHGEF40 PE=1 SV=3	55701	ARHGEF40	SOLO	protein-coding	14q11.2	Rho guanine nucleotide exchange factor 40
PPP1R13L	1	10848	sp~Q8WUF5~IASPP_HUMAN	IASPP_HUMAN Q8WUF5	sp|Q8WUF5|IASPP_HUMAN RelA-associated inhibitor OS=Homo sapiens OX=9606 GN=PPP1R13L PE=1 SV=4	10848	PPP1R13L	IASPP NKIP1 RAI RAI4	protein-coding	19q13.32	protein phosphatase 1 regulatory subunit 13 like ||| RelA-associated inhibitor
CMTM3	1	123920	sp~Q96MX0~CKLF3_HUMAN	CKLF3_HUMAN Q96MX0	sp|Q96MX0|CKLF3_HUMAN CKLF-like MARVEL transmembrane domain-containing protein 3 OS=Homo sapiens OX=9606 GN=CMTM3 PE=1 SV=1	123920	CMTM3	BNAS2 CKLFSF3	protein-coding	16q22.1	CKLF like MARVEL transmembrane domain containing 3 ||| CKLF-like MARVEL transmembrane domain-containing protein 3
FRMD6	1	122786	sp~Q96NE9~FRMD6_HUMAN	FRMD6_HUMAN Q96NE9	sp|Q96NE9|FRMD6_HUMAN FERM domain-containing protein 6 OS=Homo sapiens OX=9606 GN=FRMD6 PE=1 SV=1	122786	FRMD6	C14orf31 EX1 Willin c14_5320	protein-coding	14q22.1	FERM domain containing 6 ||| FERM domain-containing protein 6
MLXIP	1	22877	sp~Q9HAP2~MLXIP_HUMAN	MLXIP_HUMAN Q9HAP2	sp|Q9HAP2|MLXIP_HUMAN MLX-interacting protein OS=Homo sapiens OX=9606 GN=MLXIP PE=1 SV=2	22877	MLXIP	MIR MONDOA bHLHe36	protein-coding	12q24.31	MLX interacting protein ||| MLX-interacting protein
MUC5B	-1	727897	sp~Q9HC84~MUC5B_HUMAN	MUC5B_HUMAN Q9HC84	sp|Q9HC84|MUC5B_HUMAN Mucin-5B OS=Homo sapiens OX=9606 GN=MUC5B PE=1 SV=3	727897	MUC5B	MG1 MUC-5B MUC5 MUC9	protein-coding	11p15.5	mucin 5B, oligomeric mucus/gel-forming ||| Mucin-5B
EPB41L5	-1	57669	sp~Q9HCM4~E41L5_HUMAN	E41L5_HUMAN Q9HCM4	sp|Q9HCM4|E41L5_HUMAN Band 4.1-like protein 5 OS=Homo sapiens OX=9606 GN=EPB41L5 PE=1 SV=3	57669	EPB41L5	BE37 LULU LULU1 YMO1 YRT	protein-coding	2q14.2	erythrocyte membrane protein band 4.1 like 5 ||| Band 4.1-like protein 5
PDLIM7	1	9260	sp~Q9NR12~PDLI7_HUMAN	PDLI7_HUMAN Q9NR12	sp|Q9NR12|PDLI7_HUMAN PDZ and LIM domain protein 7 OS=Homo sapiens OX=9606 GN=PDLIM7 PE=1 SV=1	9260	PDLIM7	LMP1 LMP3	protein-coding	5q35.3	PDZ and LIM domain 7 ||| PDZ and LIM domain protein 7
LTBP3	1	4054	sp~Q9NS15~LTBP3_HUMAN	LTBP3_HUMAN Q9NS15	sp|Q9NS15|LTBP3_HUMAN Latent-transforming growth factor beta-binding protein 3 OS=Homo sapiens OX=9606 GN=LTBP3 PE=1 SV=4	4054	LTBP3	DASS GPHYSD3 LTBP-3 LTBP2 STHAG6 pp6425	protein-coding	11q13.1	latent transforming growth factor beta binding protein 3 ||| Latent-transforming growth factor beta-binding protein 3
PLEK2	1	26499	sp~Q9NYT0~PLEK2_HUMAN	PLEK2_HUMAN Q9NYT0	sp|Q9NYT0|PLEK2_HUMAN Pleckstrin-2 OS=Homo sapiens OX=9606 GN=PLEK2 PE=1 SV=1	26499	PLEK2	---	protein-coding	14q23.3-q24.1	pleckstrin 2 ||| Pleckstrin-2
SAMD4A	1	23034	sp~Q9UPU9~SMAG1_HUMAN	SMAG1_HUMAN Q9UPU9	sp|Q9UPU9|SMAG1_HUMAN Protein Smaug homolog 1 OS=Homo sapiens OX=9606 GN=SAMD4A PE=1 SV=3	23034	SAMD4A	SAMD4 SMAUG SMAUG1 SMG SMGA	protein-coding	14q22.2	sterile alpha motif domain containing 4A ||| Protein Smaug homolog 1
NCOR2	1	9612	sp~Q9Y618~NCOR2_HUMAN	NCOR2_HUMAN Q9Y618	sp|Q9Y618|NCOR2_HUMAN Nuclear receptor corepressor 2 OS=Homo sapiens OX=9606 GN=NCOR2 PE=1 SV=3	9612	NCOR2	CTG26 N-CoR2 SMAP270 SMRT SMRTE SMRTE-tau TNRC14 TRAC TRAC-1 TRAC1	protein-coding	12q24.31	nuclear receptor corepressor 2

## Sheet: PCA_loadings
Supplementary Table S8. The TGFβ-EMT analysis of 8 KRASG12C lung cancer cell lines.
RowIdentifier	VarID 2	Fasta headers	GeneID	TGFB-105 Sign	Symbol	p[1]	p[2]
sp~Q9HC84~MUC5B_HUMAN	MUC5B_HUMAN Q9HC84	sp|Q9HC84|MUC5B_HUMAN Mucin-5B OS=Homo sapiens OX=9606 GN=MUC5B PE=1 SV=3	727897	-1	MUC5B	-0.200468	0.123824
sp~Q8TBZ6~TM10A_HUMAN	TM10A_HUMAN Q8TBZ6	sp|Q8TBZ6|TM10A_HUMAN tRNA methyltransferase 10 homolog A OS=Homo sapiens OX=9606 GN=TRMT10A PE=1 SV=1	93587	-1	TRMT10A	-0.186453	0.141271
sp~P98088~MUC5A_HUMAN	MUC5A_HUMAN P98088	sp|P98088|MUC5A_HUMAN Mucin-5AC OS=Homo sapiens OX=9606 GN=MUC5AC PE=1 SV=4	4586	-1	MUC5AC	-0.171678	0.0922449
sp~Q9HCM4~E41L5_HUMAN	E41L5_HUMAN Q9HCM4	sp|Q9HCM4|E41L5_HUMAN Band 4.1-like protein 5 OS=Homo sapiens OX=9606 GN=EPB41L5 PE=1 SV=3	57669	-1	EPB41L5	-0.154356	-0.0265773
sp~P17275~JUNB_HUMAN	JUNB_HUMAN P17275	sp|P17275|JUNB_HUMAN Transcription factor jun-B OS=Homo sapiens OX=9606 GN=JUNB PE=1 SV=1	3726	1	JUNB	-0.149379	0.184971
sp~Q9Y618~NCOR2_HUMAN	NCOR2_HUMAN Q9Y618	sp|Q9Y618|NCOR2_HUMAN Nuclear receptor corepressor 2 OS=Homo sapiens OX=9606 GN=NCOR2 PE=1 SV=3	9612	1	NCOR2	-0.123584	0.226016
sp~Q13753~LAMC2_HUMAN	LAMC2_HUMAN Q13753	sp|Q13753|LAMC2_HUMAN Laminin subunit gamma-2 OS=Homo sapiens OX=9606 GN=LAMC2 PE=1 SV=2	3918	1	LAMC2	-0.11902	0.23384
sp~Q9NYT0~PLEK2_HUMAN	PLEK2_HUMAN Q9NYT0	sp|Q9NYT0|PLEK2_HUMAN Pleckstrin-2 OS=Homo sapiens OX=9606 GN=PLEK2 PE=1 SV=1	26499	1	PLEK2	-0.084933	0.15134
sp~Q7LGC8~CHST3_HUMAN	CHST3_HUMAN Q7LGC8	sp|Q7LGC8|CHST3_HUMAN Carbohydrate sulfotransferase 3 OS=Homo sapiens OX=9606 GN=CHST3 PE=1 SV=3	9469	1	CHST3	-0.0632654	-0.0399775
sp~Q14766~LTBP1_HUMAN	LTBP1_HUMAN Q14766	sp|Q14766|LTBP1_HUMAN Latent-transforming growth factor beta-binding protein 1 OS=Homo sapiens OX=9606 GN=LTBP1 PE=1 SV=4	4052	1	LTBP1	-0.0625237	0.0831743
sp~Q6ZWT7~MBOA2_HUMAN	MBOA2_HUMAN Q6ZWT7	sp|Q6ZWT7|MBOA2_HUMAN Lysophospholipid acyltransferase 2 OS=Homo sapiens OX=9606 GN=MBOAT2 PE=2 SV=2	129642	1	MBOAT2	-0.0472439	0.313762
sp~Q8TAG9~EXOC6_HUMAN	EXOC6_HUMAN Q8TAG9	sp|Q8TAG9|EXOC6_HUMAN Exocyst complex component 6 OS=Homo sapiens OX=9606 GN=EXOC6 PE=1 SV=3	54536	-1	EXOC6	-0.045995	0.0221351
sp~Q9HAP2~MLXIP_HUMAN	MLXIP_HUMAN Q9HAP2	sp|Q9HAP2|MLXIP_HUMAN MLX-interacting protein OS=Homo sapiens OX=9606 GN=MLXIP PE=1 SV=2	22877	1	MLXIP	-0.0447186	0.0506412
sp~Q53FA7~QORX_HUMAN	QORX_HUMAN Q53FA7	sp|Q53FA7|QORX_HUMAN Quinone oxidoreductase PIG3 OS=Homo sapiens OX=9606 GN=TP53I3 PE=1 SV=2	9540	1	TP53I3	0.00957839	0.263749
sp~Q8WUF5~IASPP_HUMAN	IASPP_HUMAN Q8WUF5	sp|Q8WUF5|IASPP_HUMAN RelA-associated inhibitor OS=Homo sapiens OX=9606 GN=PPP1R13L PE=1 SV=4	10848	1	PPP1R13L	0.0181958	0.0737002
sp~Q9NS15~LTBP3_HUMAN	LTBP3_HUMAN Q9NS15	sp|Q9NS15|LTBP3_HUMAN Latent-transforming growth factor beta-binding protein 3 OS=Homo sapiens OX=9606 GN=LTBP3 PE=1 SV=4	4054	1	LTBP3	0.0195244	0.21993
sp~P12757~SKIL_HUMAN	SKIL_HUMAN P12757	sp|P12757|SKIL_HUMAN Ski-like protein OS=Homo sapiens OX=9606 GN=SKIL PE=1 SV=2	6498	1	SKIL	0.0209531	0.220753
sp~P16035~TIMP2_HUMAN	TIMP2_HUMAN P16035	sp|P16035|TIMP2_HUMAN Metalloproteinase inhibitor 2 OS=Homo sapiens OX=9606 GN=TIMP2 PE=1 SV=2	7077	1	TIMP2	0.0401463	0.308602
sp~Q7L9B9~EEPD1_HUMAN	EEPD1_HUMAN Q7L9B9	sp|Q7L9B9|EEPD1_HUMAN Endonuclease/exonuclease/phosphatase family domain-containing protein 1 OS=Homo sapiens OX=9606 GN=EEPD1 PE=1 SV=2	80820	1	EEPD1	0.0429228	0.0511239
sp~P36897~TGFR1_HUMAN	TGFR1_HUMAN P36897	sp|P36897|TGFR1_HUMAN TGF-beta receptor type-1 OS=Homo sapiens OX=9606 GN=TGFBR1 PE=1 SV=1	7046	1	TGFBR1	0.0431123	-0.202897
sp~Q02388~CO7A1_HUMAN	CO7A1_HUMAN Q02388	sp|Q02388|CO7A1_HUMAN Collagen alpha-1(VII) chain OS=Homo sapiens OX=9606 GN=COL7A1 PE=1 SV=2	1294	1	COL7A1	0.0542199	0.0751424
sp~Q8N4X5~AF1L2_HUMAN	AF1L2_HUMAN Q8N4X5	sp|Q8N4X5|AF1L2_HUMAN Actin filament-associated protein 1-like 2 OS=Homo sapiens OX=9606 GN=AFAP1L2 PE=1 SV=1	84632	1	AFAP1L2	0.0846485	0.226136
sp~Q96MX0~CKLF3_HUMAN	CKLF3_HUMAN Q96MX0	sp|Q96MX0|CKLF3_HUMAN CKLF-like MARVEL transmembrane domain-containing protein 3 OS=Homo sapiens OX=9606 GN=CMTM3 PE=1 SV=1	123920	1	CMTM3	0.104434	-0.016589
sp~Q03405~UPAR_HUMAN	UPAR_HUMAN Q03405	sp|Q03405|UPAR_HUMAN Urokinase plasminogen activator surface receptor OS=Homo sapiens OX=9606 GN=PLAUR PE=1 SV=1	5329	1	PLAUR	0.115032	0.00895036
sp~Q9NR12~PDLI7_HUMAN	PDLI7_HUMAN Q9NR12	sp|Q9NR12|PDLI7_HUMAN PDZ and LIM domain protein 7 OS=Homo sapiens OX=9606 GN=PDLIM7 PE=1 SV=1	9260	1	PDLIM7	0.117491	0.179071
sp~Q10471~GALT2_HUMAN	GALT2_HUMAN Q10471	sp|Q10471|GALT2_HUMAN Polypeptide N-acetylgalactosaminyltransferase 2 OS=Homo sapiens OX=9606 GN=GALNT2 PE=1 SV=1	2590	1	GALNT2	0.118484	0.179448
sp~Q07352~TISB_HUMAN	TISB_HUMAN Q07352	sp|Q07352|TISB_HUMAN mRNA decay activator protein ZFP36L1 OS=Homo sapiens OX=9606 GN=ZFP36L1 PE=1 SV=1	677	1	ZFP36L1	0.12812	0.260081
sp~Q8NEY1~NAV1_HUMAN	NAV1_HUMAN Q8NEY1	sp|Q8NEY1|NAV1_HUMAN Neuron navigator 1 OS=Homo sapiens OX=9606 GN=NAV1 PE=1 SV=2	89796	1	NAV1	0.13625	0.0363826
sp~Q96NE9~FRMD6_HUMAN	FRMD6_HUMAN Q96NE9	sp|Q96NE9|FRMD6_HUMAN FERM domain-containing protein 6 OS=Homo sapiens OX=9606 GN=FRMD6 PE=1 SV=1	122786	1	FRMD6	0.158492	0.13211
sp~P13497~BMP1_HUMAN	BMP1_HUMAN P13497	sp|P13497|BMP1_HUMAN Bone morphogenetic protein 1 OS=Homo sapiens OX=9606 GN=BMP1 PE=1 SV=2	649	1	BMP1	0.159435	0.222744
sp~O75962~TRIO_HUMAN	TRIO_HUMAN O75962	sp|O75962|TRIO_HUMAN Triple functional domain protein OS=Homo sapiens OX=9606 GN=TRIO PE=1 SV=2	7204	1	TRIO	0.180294	-0.0267431
sp~P13611~CSPG2_HUMAN	CSPG2_HUMAN P13611	sp|P13611|CSPG2_HUMAN Versican core protein OS=Homo sapiens OX=9606 GN=VCAN PE=1 SV=3	1462	1	VCAN	0.180638	0.154573
sp~Q8TER5~ARH40_HUMAN	ARH40_HUMAN Q8TER5	sp|Q8TER5|ARH40_HUMAN Rho guanine nucleotide exchange factor 40 OS=Homo sapiens OX=9606 GN=ARHGEF40 PE=1 SV=3	55701	1	ARHGEF40	0.182664	-0.106074
sp~Q6NYC8~PPR18_HUMAN	PPR18_HUMAN Q6NYC8	sp|Q6NYC8|PPR18_HUMAN Phostensin OS=Homo sapiens OX=9606 GN=PPP1R18 PE=1 SV=1	170954	1	PPP1R18	0.185098	0.0832335
sp~Q15121~PEA15_HUMAN	PEA15_HUMAN Q15121	sp|Q15121|PEA15_HUMAN Astrocytic phosphoprotein PEA-15 OS=Homo sapiens OX=9606 GN=PEA15 PE=1 SV=2	8682	1	PEA15	0.191232	-0.133053
sp~O43294~TGFI1_HUMAN	TGFI1_HUMAN O43294	sp|O43294|TGFI1_HUMAN Transforming growth factor beta-1-induced transcript 1 protein OS=Homo sapiens OX=9606 GN=TGFB1I1 PE=1 SV=2	7041	1	TGFB1I1	0.20348	0.129389
sp~P05121~PAI1_HUMAN	PAI1_HUMAN P05121	sp|P05121|PAI1_HUMAN Plasminogen activator inhibitor 1 OS=Homo sapiens OX=9606 GN=SERPINE1 PE=1 SV=1	5054	1	SERPINE1	0.208775	0.0785371
sp~P09493~TPM1_HUMAN	TPM1_HUMAN P09493	sp|P09493|TPM1_HUMAN Tropomyosin alpha-1 chain OS=Homo sapiens OX=9606 GN=TPM1 PE=1 SV=2	7168	1	TPM1	0.209471	-0.148898
sp~P08648~ITA5_HUMAN	ITA5_HUMAN P08648	sp|P08648|ITA5_HUMAN Integrin alpha-5 OS=Homo sapiens OX=9606 GN=ITGA5 PE=1 SV=2	3678	1	ITGA5	0.211365	-0.00956995
sp~Q9UPU9~SMAG1_HUMAN	SMAG1_HUMAN Q9UPU9	sp|Q9UPU9|SMAG1_HUMAN Protein Smaug homolog 1 OS=Homo sapiens OX=9606 GN=SAMD4A PE=1 SV=3	23034	1	SAMD4A	0.215965	0.0140762
sp~P12814~ACTN1_HUMAN	ACTN1_HUMAN P12814	sp|P12814|ACTN1_HUMAN Alpha-actinin-1 OS=Homo sapiens OX=9606 GN=ACTN1 PE=1 SV=2	87	1	ACTN1	0.219234	-0.0746041
sp~Q16643~DREB_HUMAN	DREB_HUMAN Q16643	sp|Q16643|DREB_HUMAN Drebrin OS=Homo sapiens OX=9606 GN=DBN1 PE=1 SV=4	1627	1	DBN1	0.21936	-0.0126272
sp~Q86XL3~ANKL2_HUMAN	ANKL2_HUMAN Q86XL3	sp|Q86XL3|ANKL2_HUMAN Ankyrin repeat and LEM domain-containing protein 2 OS=Homo sapiens OX=9606 GN=ANKLE2 PE=1 SV=4	23141	1	ANKLE2	0.219749	0.0311069
sp~Q6ZSZ5~ARHGI_HUMAN	ARHGI_HUMAN Q6ZSZ5	sp|Q6ZSZ5|ARHGI_HUMAN Rho guanine nucleotide exchange factor 18 OS=Homo sapiens OX=9606 GN=ARHGEF18 PE=1 SV=4	23370	1	ARHGEF18	0.228522	0.0384073
sp~P21333~FLNA_HUMAN	FLNA_HUMAN P21333	sp|P21333|FLNA_HUMAN Filamin-A OS=Homo sapiens OX=9606 GN=FLNA PE=1 SV=4	2316	1	FLNA	0.241143	-0.00364276

## Sheet: PCA_scores
Supplementary Table S8. The TGFβ-EMT analysis of 8 KRASG12C lung cancer cell lines.
RowIdentifier	t[1]	t[2]
H2122	-6.73002	-1.95385
H358	-2.67047	2.71255
H1373	-1.83255	4.35627
HCC44	-0.393665	-1.12111
H1792	0.492218	0.420898
H23	0.95559	-5.50356
Hop62	3.88038	-0.0858166
Calu1	6.29835	1.11816
