# Supplementary material for: Cell Type–specific Adaptive Signaling Responses to KRASG12C Inhibition
Source: Oxford University Press journal article supplement (doi:10.1158/1078-0432.ccr-20-3872), 2021-02-22
Supplement: 10780432ccr203872-sup-252918_4_supp_6912876_qccb39.xlsx [file 10780432ccr203872-sup-252918_4_supp_6912876_qccb39.xlsx]

## Sheet: S9
Supplementary Table S9. The correlation analysis between genes of interest and EMT score in SPORE 442 KRASG12C lung cancer mutants.
KID															K254	K432	K185	K466	K144	K299	K353	K004	K196	K161	K354	K268	K340	K089	K309	K428	K197	K243	K150	K402	K251	K147	K042	K095	K091	K468	K358	K121	K092	K430	K236	K208	K127	K133	K344
Gender															F	F	F	F	F	F	M	F	M	M	M	M	M	F	F	M	F	M	F	M	F	F	F	M	F	F	M	M	F	F	M	M	F	F	F
KRAS_status															Mut	Mut	Mut	Mut	Mut	Mut	Mut	Mut	Mut	Mut	Mut	Mut	Mut	Mut	Mut	Mut	Mut	Mut	Mut	Mut	Mut	Mut	Mut	Mut	Mut	Mut	Mut	Mut	Mut	Mut	Mut	Mut	Mut	Mut	Mut
KRAS_aa_mut															G12GC	G12GC	G12GC	G12GC	G12GC	G12GC	G12GC	G12GC	G12GC	G12GC	G12GC	G12GC	G12GC	G12GC	G12GC	G12GC	G12GC	G12GC	G12GC	G12GC	G12GC	G12GC	G12GC	G12GC	G12GC	G12GC	G12GC	G12GC	G12GC	G12GC	G12GC	G12GC	G12GC	G12GC	G12C
EGFR_status															WT	WT	WT	WT	WT	WT	WT	WT	WT	WT	WT	WT	WT	WT	WT	WT	WT	WT	WT	WT	WT	WT	WT	WT	WT	WT	WT	WT	WT	WT	WT	WT	WT	WT	WT
EGFR_aa_mut
STK11_status															WT	WT	Mut	WT	WT	Mut	WT	Mut	Mut	WT	Mut	WT	WT	WT	WT	WT	WT	WT	WT	WT	WT	Mut	WT	WT	WT	Mut	WT	WT	WT	WT	Mut	WT	WT	WT	WT
STK11_aa_mut																	L55fs*5			D284fs*4		Q152*	E65*		S216F											D53fs*110				Y261fs*26					D194Y
STK11_aa_inherited															F354L											H168L
TP53_status															WT	WT	WT	WT	WT	WT	WT	WT	WT	Mut	WT	WT	WT	WT	WT	WT	WT	WT	WT	WT	WT	WT	WT	Mut	WT	WT	WT	Mut	WT	WT	WT	WT	Mut	WT	Mut
TP53_aa_mut																								Q136E														G154V|||P190L				MA161_162IS					R249S		S241F
TP53_aa_inherited
Gordian_TGFB-105_PC1												P-values			-14.795	-14.685	-11.79	-11.2719	-9.72906	-8.80419	-6.90777	-6.66922	-6.66488	-6.53995	-6.36641	-5.98569	-5.02208	-4.43292	-3.99821	-2.94713	-2.86402	-2.85166	-1.91336	-1.66819	-1.28003	-1.12759	-1.12159	-0.844936	0.482803	0.723346	0.774385	0.80969	1.44129	1.59886	1.59963	1.6041	1.67435	2.96845	3.27452
ProbeSet	Sense	Accession	GeneID	Symbol	Alias	Type	Location	Description	Average	r TGFB-105	r TGFB-105	Median cut	Tertiles	Quantiles	@52070900784124110609406473387695	@52070900799947052410407590899424	@52070900784438031610407113554135	@52070900905409060711410661721596	@52070900905421060811410662722961	@52070900779940082209406071606684	@52070900797081031210407111628207	@52070900905249050811410472058737	@52070900781746012110406842626844	@52070900786524090510408221043733	@52070900779631091810408278055638	@52070900786387090410408220641604	@52070900905681060611410661318680	@52070900803937090410408220439378	@52070900784470090310408220037357	@52070900780616100509406331655375	@52070900797081031210407111628192	@52070900784457090210408219712526	@52070900797083031210407111929182	@52070900784117110509406473287223	@52070900797083031210407111929172	@52070900784384100309406331554345	@52070900784141110309406472681662	@52070900803937090410408220439375	@52070900784370100309406331554230	@52070900782665072010407829805235	@52070900803937090410408220439351	@52070900810471010711409335692938	@52070900803732091510408276942166	@52070900797084031210407111929261	@52070900784114110609406473387515	@52070900796517030610407095601339	@52070900784370100309406331554209	@52070900905246050811410472058660	@52070900805365120210408936873666
merck-NM_001699_at	Sense	NM_021913 NM_001699 NM_001278599 HI464132 HI464134 X66029	558	AXL	ARK JTK11 Tyro7 UFO	rna_protein-coding|genomic_protein-coding	19q13.2	AXL receptor tyrosine kinase	10.9415	0.748508	9.40306e-12	1.32086e-05	2.30274e-06	1.83937e-06	9.92859	9.61903	9.97355	9.44418	10.7661	9.41069	10.9432	9.67994	11.0565	8.83831	9.26207	11.2596	9.59317	10.5145	11.2385	9.9894	11.4001	11.2055	11.2364	10.8407	11.003	11.0306	11.2006	11.1789	10.8366	11.0968	11.0026	10.2122	11.347	11.4463	11.288	10.496	10.713	11.4252	10.9683
merck-NM_000604_at	Sense	NM_023110 NM_001174063 NM_001174064 NM_001174065 NM_001174066 NM_001174067 NM_015850 NM_023105 NM_023106 XM_017013224 XM_017013225 XM_011544450 XM_017013226 XM_017013227 XM_017013228 XM_017013230 XM_011544446 XM_011544447 XM_017013220 XR_001745495 NG_007729 AB208919 AK222718 BC015035 BC018128 BC091494 BX649167 FJ809917 M34185 M34186 M34641 M37722 M60485 M63887 M63888 X66945	2260	FGFR1	BFGFR CD331 CEK ECCL FGFBR FGFR-1 FLG FLT-2 FLT2 HBGFR HH2 HRTFDS KAL2 N-SAM OGD bFGF-R-1	rna_protein-coding|genomic_protein-coding	8p11.23	fibroblast growth factor receptor 1	8.16088	0.706549	4.03636e-10	2.03273e-05	5.17843e-06	3.06742e-08	6.98496	7.18091	7.17893	6.67708	7.903	8.36224	7.82452	6.48215	7.48995	6.64598	7.05844	7.66044	7.76691	7.41833	8.02056	9.42317	8.02031	8.41217	7.55474	8.85491	8.23437	8.09252	7.34283	7.55844	7.36689	8.10659	8.3333	8.53702	8.72884	8.5898	8.90957	7.4723	8.10412	7.82275	8.59018
merck-NM_003380_a_at	Sense	NM_003380 XM_006717500 NG_012413 EF445046 AF328728 AK056766 AK091813 AK093924 AK097336 AK098444 AK222482 AK222507 AK222602 AK290643 BC000163 BC030573 BC031031 BC066956 CR407690 EU794672 KU178388 KU178389 M25246 X56134 Z19554	7431	VIM	CTRCT30 HEL113	rna_protein-coding|genomic_protein-coding	10p13	vimentin	13.0061	0.603392	4.23035e-07	0.00327588	0.000286758	0.000215896	12.5602	12.8577	12.5356	12.418	13.0454	12.8124	13.0618	12.313	12.8404	12.3624	12.8071	12.91	13.0465	13.0212	13.0637	12.8487	13.0872	13.0874	13.1032	13.2054	13.0555	13.0751	13.1356	13.0214	13.2237	13.1106	12.9037	12.7583	13.084	13.3337	12.9749	12.6851	13.1097	13.2034	12.8981
merck-NM_001792_a_at	Sense	NM_001792 NM_001308176 XM_011525788 NG_011959 AI675151 AW016710 BC021695 BC036470 BX648579 M34064 S42303 X57548	1000	CDH2	CD325 CDHN CDw325 NCAD	rna_protein-coding|genomic_protein-coding	18q12.1	cadherin 2	6.43245	0.550361	6.30693e-06	0.000163932	0.000114372	0.000405343	2.90801	6.44046	3.40732	4.42359	6.064	9.05546	3.51401	6.60011	7.20033	6.25935	3.92442	4.52093	9.18184	5.70901	3.92409	5.08969	5.08324	3.32229	6.79322	5.63698	5.12857	7.13942	3.2708	6.06325	5.15192	6.31288	7.66168	5.71574	5.38025	6.83466	8.02089	3.92161	6.0442	6.12171	11.0061
merck-CR593388_at	Sense	NM_001159920 NG_012003 AK092472	2321	FLT1	FLT FLT-1 VEGFR-1 VEGFR1	rna_protein-coding|genomic_protein-coding	13q12.3	fms related tyrosine kinase 1	8.68233	0.46606	0.000199109	8.50745e-06	2.40323e-05	0.000651309	8.14434	6.91068	8.1239	9.74939	7.6813	7.67197	7.4213	8.93553	8.36833	7.41559	9.27725	8.71039	7.2792	8.42584	7.9378	8.6315	7.01048	8.51698	8.39464	6.85344	8.84197	9.20722	7.60464	7.40315	9.33443	9.43284	9.74943	8.95119	7.68799	6.49582	8.56921	10.0517	9.83721	8.25887	9.4572
merck2-M29644_at	Sense	NM_001111283 NM_001111284 NM_001111285 NM_000618 XM_017019259 XM_017019260 XM_017019261 XM_017019262 XM_017019263 NG_011713 GN335338 AB209184 AK312231 BC148266 BC152321 BC160082 CR541861 M11568 M27544 M29644 M37484 U40870 X00173 X56773 X56774 X57025	3479	IGF1	IGF-I IGFI MGF	rna_protein-coding|genomic_protein-coding	12q23.2	insulin like growth factor 1	8.0315	0.333018	0.00995907	0.00712236	0.0257012	0.0267988	6.10607	6.21412	6.62237	8.62163	7.21926	8.07153	7.85214	6.17733	8.05139	6.19636	5.8799	7.31445	7.51888	7.06823	8.13978	8.02075	8.12182	8.27471	6.99581	9.1186	7.50807	8.66632	8.7493	6.94704	7.56743	8.76365	7.59081	7.53064	9.46212	8.06571	9.81527	8.52093	7.9804	8.10056	10.7122
merck2-NM_000876_at	Sense	NM_000876 J03528 Y00285	3482	IGF2R	CD222 CI-M6PR CIMPR M6P-R M6P/IGF2R MPR-300 MPR1 MPR300 MPRI	rna_protein-coding	6q25.3	insulin like growth factor 2 receptor	10.2876	0.32608	0.0117227	0.0124168	0.0174693	0.0328053	9.96209	9.74365	9.5134	10.0626	10.1941	10.9259	9.96368	9.87934	10.1456	9.12754	10.122	10.2757	10.54	10.417	10.4494	10.629	10.0547	10.3234	10.0419	10.0275	10.1192	10.7171	10.7198	10.6573	10.2194	10.5164	10.0335	10.1494	10.0325	9.39052	10.4337	10.5577	10.2041	9.91579	10.4608
merck-NM_002006_at	Sense	NM_002006 BE439775 J04513	2247	FGF2	BFGF FGF-2 FGFB HBGF-2	rna_protein-coding	4q28.1	fibroblast growth factor 2	6.25103	0.321569	0.0130092	0.40852	0.0922901	0.0256481	4.47609	5.03308	5.89236	4.65603	6.12426	6.58796	6.2296	4.7688	6.53509	6.21793	4.80182	6.10159	7.17281	4.45585	7.30403	5.23273	5.51544	7.05851	6.72253	7.59884	6.1154	6.71478	6.99409	6.00569	6.62601	6.72251	6.34206	5.18881	7.43653	7.997	6.38087	4.87714	6.24584	6.37669	6.55103
merck-BC027302_at	Sense	NM_182925 XM_011534478 XM_017009263 XM_017009268 XM_011534484 XR_001742050 NG_011536 BC027302 CA438330	2324	FLT4	FLT-4 FLT41 LMPH1A PCL VEGFR-3 VEGFR3	rna_protein-coding|genomic_protein-coding	5q35.3	fms related tyrosine kinase 4	7.6731	0.295417	0.0231138	0.028962	0.0681082	0.075766	7.10759	7.56524	7.14277	7.47801	6.82882	7.09508	7.9001	7.30057	7.687	6.75493	8.01082	7.82703	7.31455	6.93476	7.47072	7.82562	8.20183	7.75641	7.78685	7.84168	7.84911	8.1994	7.41822	7.02518	7.32504	7.98103	7.59078	6.90076	8.2232	7.66786	7.74067	8.7967	8.19742	6.93676	7.83014
merck-NM_002253_at	Sense	NM_002253 NG_012004 AB209901 AF035121	3791	KDR	CD309 FLK1 VEGFR VEGFR2	rna_protein-coding|genomic_protein-coding	4q12	kinase insert domain receptor	9.14478	0.272427	0.0368482	0.253021	0.0606334	0.0757428	8.10036	7.09582	7.88734	8.78025	8.12665	8.58736	10.5161	7.64063	8.7254	6.64447	9.38042	8.49556	9.78418	7.15223	8.79316	8.95451	10.595	8.81082	8.87551	9.77313	9.25761	9.52269	9.54719	10.6664	9.92577	9.06131	9.1937	9.27436	10.3276	10.3577	8.44593	9.62449	10.2007	10.3924	9.30701
merck-NM_001004356_at	Sense	NM_001004356 NM_001004358 NM_021923 XM_011513486 AF312678 AJ277437 AK000530 AK022597 AY358303 BC002537 BC013955 BC015228 BC036769	53834	FGFRL1	FGFR5 FHFR	rna_protein-coding	4p16.3	fibroblast growth factor receptor-like 1	7.26961	0.0269516	0.839427	0.099631	0.608308	0.97611	7.96173	7.94676	7.96913	6.85618	6.45026	6.88573	7.08528	7.66024	7.36046	7.52922	6.98578	7.33285	6.64716	7.03439	7.21563	7.06878	6.66909	7.10965	7.49394	7.27856	6.67974	7.42154	7.35461	6.99248	7.02393	7.46172	6.45502	6.61395	7.3457	7.32097	7.02258	8.2281	7.96148	6.76636	8.48904
merck-BC070081_a_at	Sense	NM_005228 CS238505 CS542488 GM619915 HC464560 JA807020 JA807083 JA913745 KT584716 AB209442 AK225422 AK290352 AK294750 BC070081 HQ912715 X00588	1956	EGFR	ERBB ERBB1 HER1 NISBD2 PIG61 mENA	rna_protein-coding|genomic_protein-coding	7p11.2	epidermal growth factor receptor	10.0926	0.0111264	0.933345	0.125919	0.526007	0.940143	9.47587	10.6697	10.0999	8.00958	10.2844	9.75516	10.695	9.91192	10.2641	10.5487	9.2106	9.8716	9.80265	10.7835	10.4944	9.96094	11.9481	11.351	10.0507	10.6668	10.9416	9.43313	10.7797	9.41375	11.0014	9.57644	11.3639	9.83768	10.1158	10.9322	10.2104	9.47663	9.9129	10.3357	7.68776
merck2-NM_022970_at	Sense	NM_000141 NM_023029 NM_001320654 NM_001320658 NM_022970 NM_001144914 NM_001144915 NM_001144916 NM_001144917 NM_001144918 NR_073009 XM_006717708 XM_017015925 XM_006717710 XM_017015920 XM_017015921 XM_006717711 XM_017015922 XM_017015923 XM_006717712 XM_017015924 NG_012449 CS173036 BC037338 CB305736 M87770	2263	FGFR2	BBDS BEK BFR-1 CD332 CEK3 CFD1 ECT1 JWS K-SAM KGFR TK14 TK25	rna_protein-coding|genomic_protein-coding	10q26.13	fibroblast growth factor receptor 2	8.63667	-0.11506	0.385522	0.0990036	0.42352	0.735467	7.11414	10.1766	8.33618	8.67845	9.4725	8.68775	10.1437	6.51902	9.77162	9.61577	7.11801	8.80427	9.63732	8.70305	9.23893	8.76126	8.45787	9.90588	8.27707	9.47851	8.5079	8.62849	8.92918	8.92612	8.43054	9.05369	8.47667	8.17342	9.06722	9.75702	8.36058	8.71792	7.95009	7.03687	8.86841
merck-ENST00000333402_s_at	Sense	NM_000875 NM_001291858 XM_017022136 XM_017022137 XM_017022138 AB425196 BC010607 BC078157 BC088377 BC111046	3480	IGF1R	CD221 IGFIR IGFR JTK13	rna_protein-coding	15q26.3	insulin like growth factor 1 receptor	10.04	-0.119754	0.3663	0.234106	0.546212	0.840929	10.4679	10.3631	11.1116	9.33106	9.65131	10.248	10.4452	10.091	10.4057	10.2679	9.95245	10.5463	10.6656	8.16189	10.0496	10.6237	10.381	9.40453	10.1322	10.6467	10.192	9.94353	10.251	9.54261	9.53294	10.4203	9.99583	10.6313	9.85271	10.5757	9.8831	10.8323	9.51153	9.07847	10.2695
merck-NM_004360_at	Sense	NM_004360 NM_001317184 NM_001317185 NM_001317186 XM_011523488 XM_011523489 NG_008021 Z35415 AI890107 BC013851 BC141838 BC146662 EU709494 Z13009	999	CDH1	Arc-1 CD324 CDHE ECAD LCAM UVO	rna_protein-coding|genomic_protein-coding	16q22.1	cadherin 1	11.9983	-0.151038	0.253502	0.431133	0.494209	0.439872	11.9193	12.6321	12.425	11.2176	12.2601	12.0008	12.0752	11.8687	12.1014	12.8543	11.9366	11.8121	11.57	12.2959	11.5315	11.9072	12.1085	11.7858	12.0587	11.6825	12.3782	11.8396	12.1775	12.1566	12.3292	11.8424	12.268	11.8904	12.2094	12.1028	11.9328	11.8087	12.5346	11.9461	11.4691
merck-NM_001005862_s_at	Sense	NM_004448 NM_001005862 NM_001289936 NM_001289937 NR_110535 JA362572 JA851628 KT583887 BC080193 BM678576 M11730 X03363	2064	ERBB2	CD340 HER-2 HER-2/neu HER2 MLN-19 NEU NGL TKR1	rna_protein-coding|genomic_protein-coding	17q12	erb-b2 receptor tyrosine kinase 2	11.0463	-0.499533	5.63088e-05	0.00197367	0.000439634	0.000642666	11.5774	12.0614	12.1	11.4004	10.5549	11.1752	11.7384	10.9453	11.2256	11.6828	12.2636	11.1885	10.911	10.7647	11.1183	11.3488	11.6837	11.0703	11.2242	11.31	11.5127	10.8899	10.7648	10.6727	11.123	10.6844	10.7289	11.5322	10.6778	11.6125	11.177	11.2102	11.5043	10.8578	10.8309
merck2-NM_001982_at	Sense	NM_001982 NG_011529 AA524528 AK125028 BU674508 BX641868	2065	ERBB3	ErbB-3 HER3 LCCS2 MDA-BF-1 c-erbB-3 c-erbB3 erbB3-S p180-ErbB3 p45-sErbB3 p85-sErbB3	rna_protein-coding|genomic_protein-coding	12q13.2	erb-b2 receptor tyrosine kinase 3	10.969	-0.566252	2.9477e-06	0.000162323	4.25622e-05	0.000209102	11.6194	11.9149	11.0788	11.364	10.7992	11.3438	11.8447	10.787	11.4975	12.0973	11.7717	10.8181	11.2968	10.8032	11.3256	11.6279	11.7325	10.8749	11.5264	10.7731	10.9384	11.065	11.6964	10.9594	10.8005	10.7753	10.4706	11.2424	10.9842	11.5959	11.0823	11.7952	10.6763	11.4265	10.824
[truncated: 24 more columns]
